# Supplementary material for: Syntheses, Structures, and Electrochemical Properties of Metallacyclic Oxidovanadium(V) Complexes with Asymmetric Multidentate Linking Ligands
Source: MDPI journal article supplement (doi:10.3390/molecules29081700), 2024-04-09

## Supplementary Materials

# Syntheses, Structures, and Electrochemical Properties of Metallacyclic Oxovanadium(V) Complexes with Asymmetric Multidentate Linking Ligands

Kyoko Hasegawa, Masahiro Muto, Masanobu Hamada, Yasunori Yamada, Tadashi Tokii, and Masayuki Koikawa\*

Department of Chemistry and Applied Chemistry, Faculty of Science and Engineering, Saga University, Honjo 1, Saga 840-8502, Japan; koikawa@cc.saga-u.ac.jp

\* Correspondence: koikawa@cc.saga-u.ac.jp

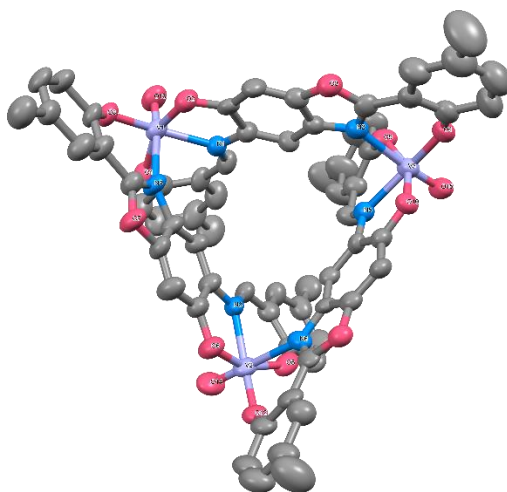

Figure S1. X-ray crystal structure of 2.

Table S1 Crystal data and structure refinement for 2.

|                                             |                                                                               |                                        |                                    |
|---------------------------------------------|-------------------------------------------------------------------------------|----------------------------------------|------------------------------------|
| Empirical formula                           | C <sub>70</sub> H <sub>48</sub> N <sub>8</sub> O <sub>19</sub> V <sub>3</sub> | Formula weight                         | 1458.02                            |
| Temperature / K                             | 296                                                                           |                                        |                                    |
| Crystal system                              | triclinic                                                                     | Space group                            | $P\bar{1}$                         |
| $a$ / Å                                     | 15.307(5)                                                                     | $\alpha$ / °                           | 87.11(2)                           |
| $b$ / Å                                     | 15.582(5)                                                                     | $\beta$ / °                            | 69.06(2)                           |
| $c$ / Å                                     | 18.458(5)                                                                     | $\gamma$ / °                           | 79.74(3)                           |
| Volume / Å <sup>3</sup>                     | 4045(2)                                                                       | $Z$                                    | 2                                  |
| $\rho_{\text{calc}}$ / cm <sup>3</sup>      | 1.197                                                                         | Crystal size/mm <sup>3</sup>           | 0.9 × 0.3 × 0.1                    |
| $\mu$ / mm <sup>-1</sup>                    | 4.056                                                                         | F(000)                                 | 1490.0                             |
| Radiation                                   | MoK $\alpha$ ( $\lambda$ = 0.71069)                                           | 2 $\theta$ range for data collection/° | 6.25 to 54.974                     |
| Reflections collected                       | 11453                                                                         | Independent reflections                | 10895 ( $R_{\text{int}}$ = 0.0983) |
| Data/restraints/parameters                  | 10895/0/863                                                                   | Goodness-of-fit on F <sup>2</sup>      | 0.927                              |
| Final $R$ indexes [ $I \geq 2\sigma(I)$ ]   | $R_1$ = 0.0858<br>$wR_2$ = 0.2336                                             | Final $R$ indexes [all data]           | $R_1$ = 0.2692<br>$wR_2$ = 0.3156  |
| Largest diff. peak/hole / e Å <sup>-3</sup> | 0.73/−0.35                                                                    |                                        |                                    |

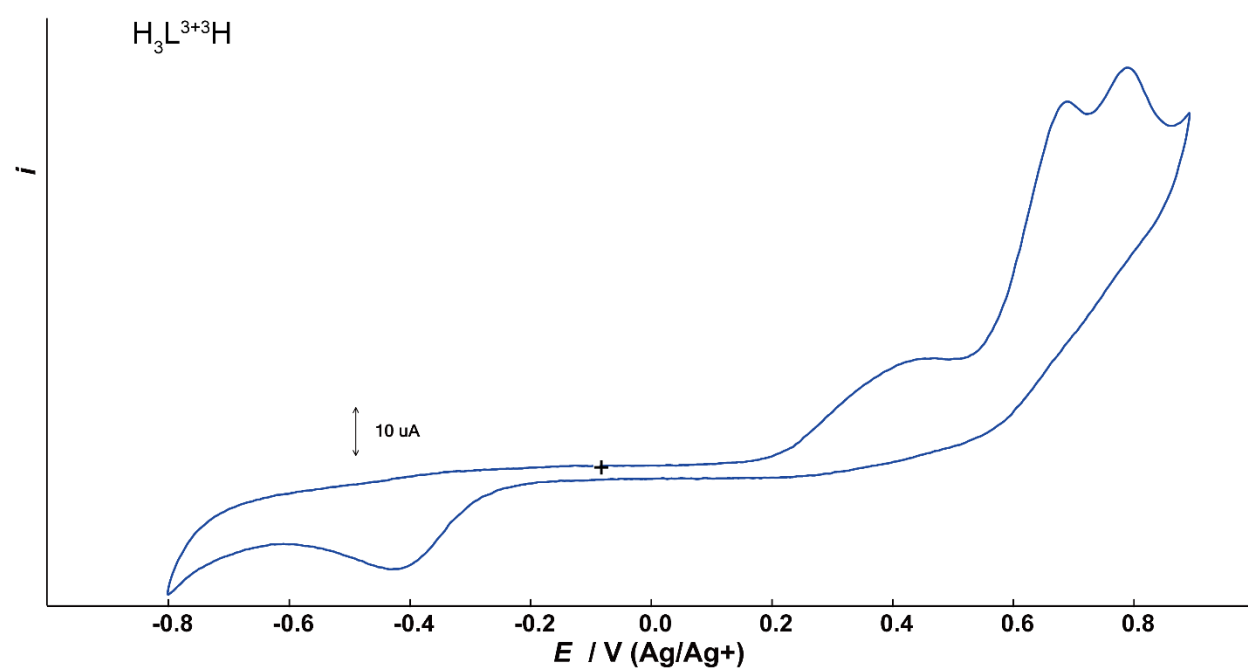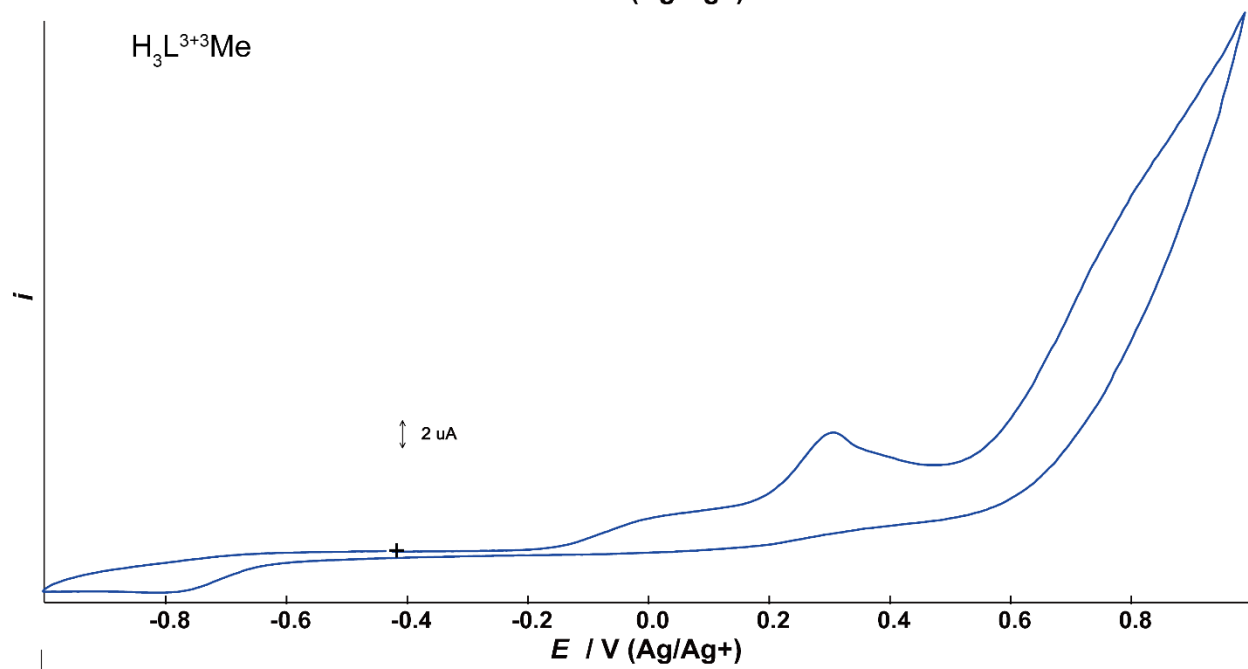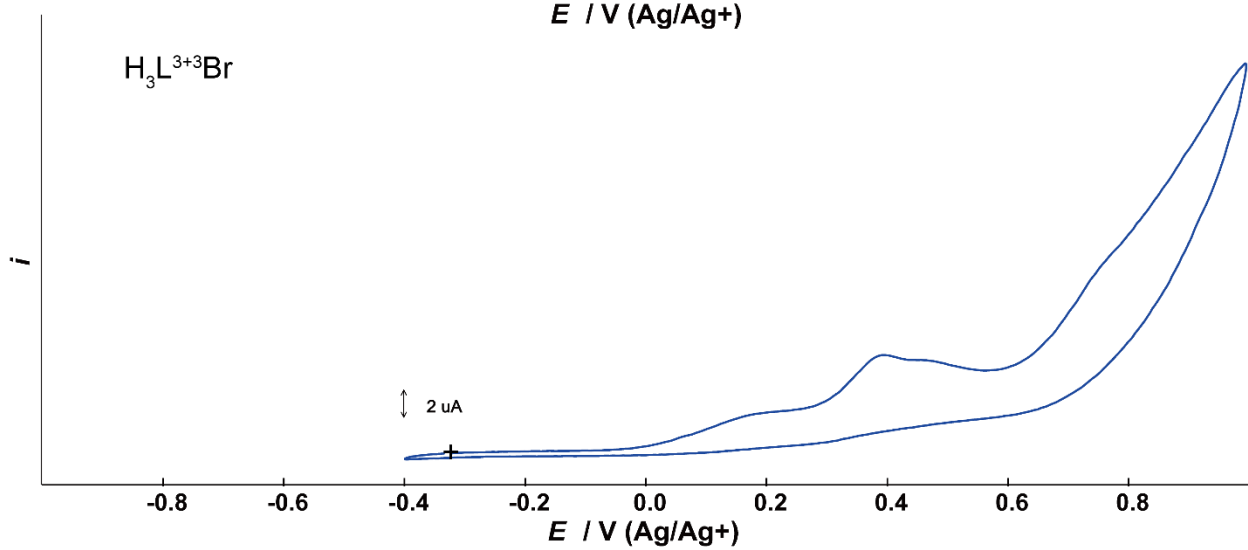

Figure S2. Cyclic voltammograms for the ligands.

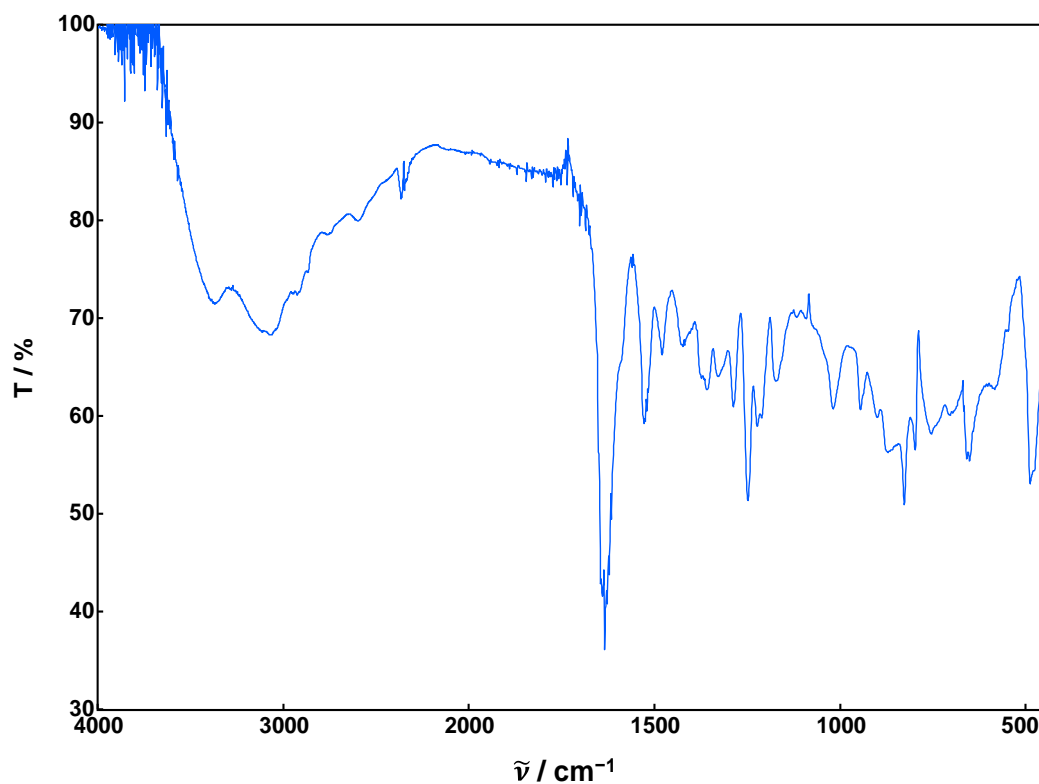

**Figure S3.** IR spectrum of  $\text{H}_4\text{L}^{3+}\text{Me}\cdot\text{HCl}$ .

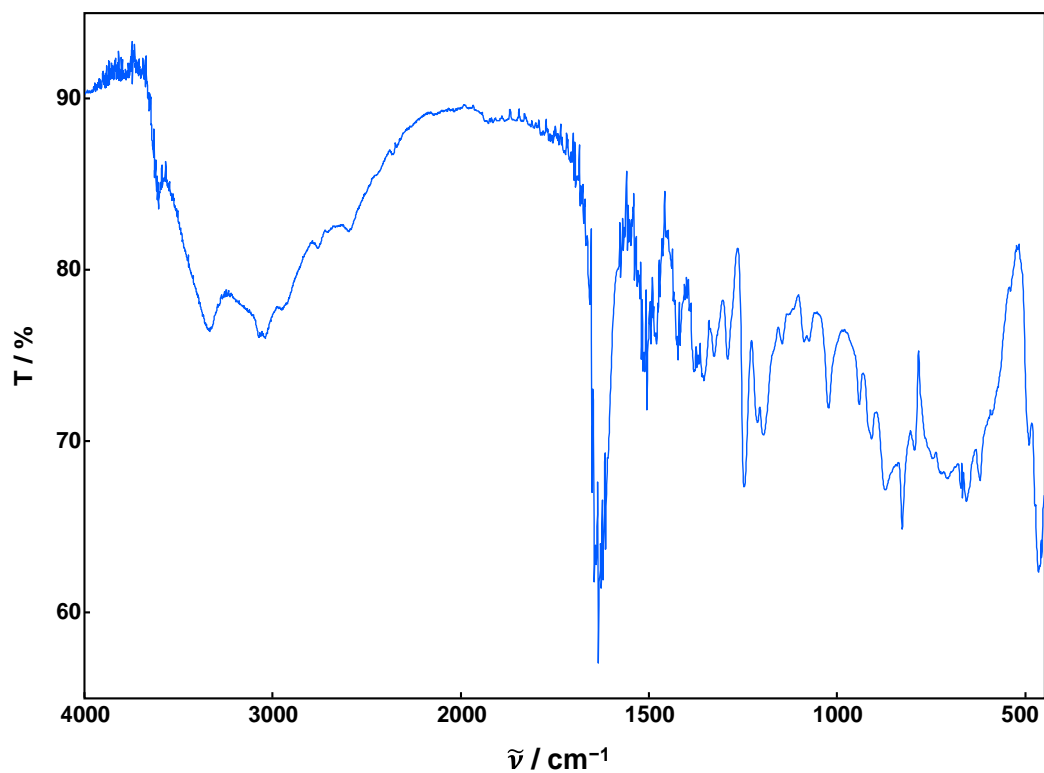

**Figure S4.** IR spectrum of  $\text{H}_4\text{L}^{3+}\text{Br}\cdot\text{HCl}$ .

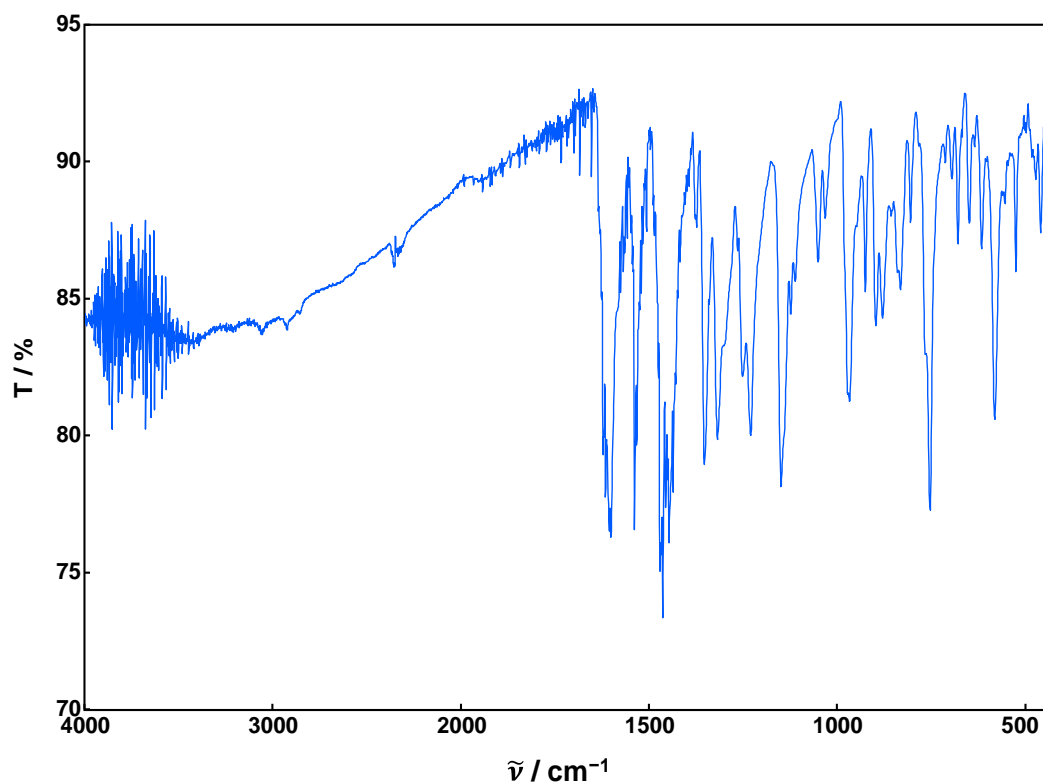

**Figure S5.** IR spectrum of **1**.

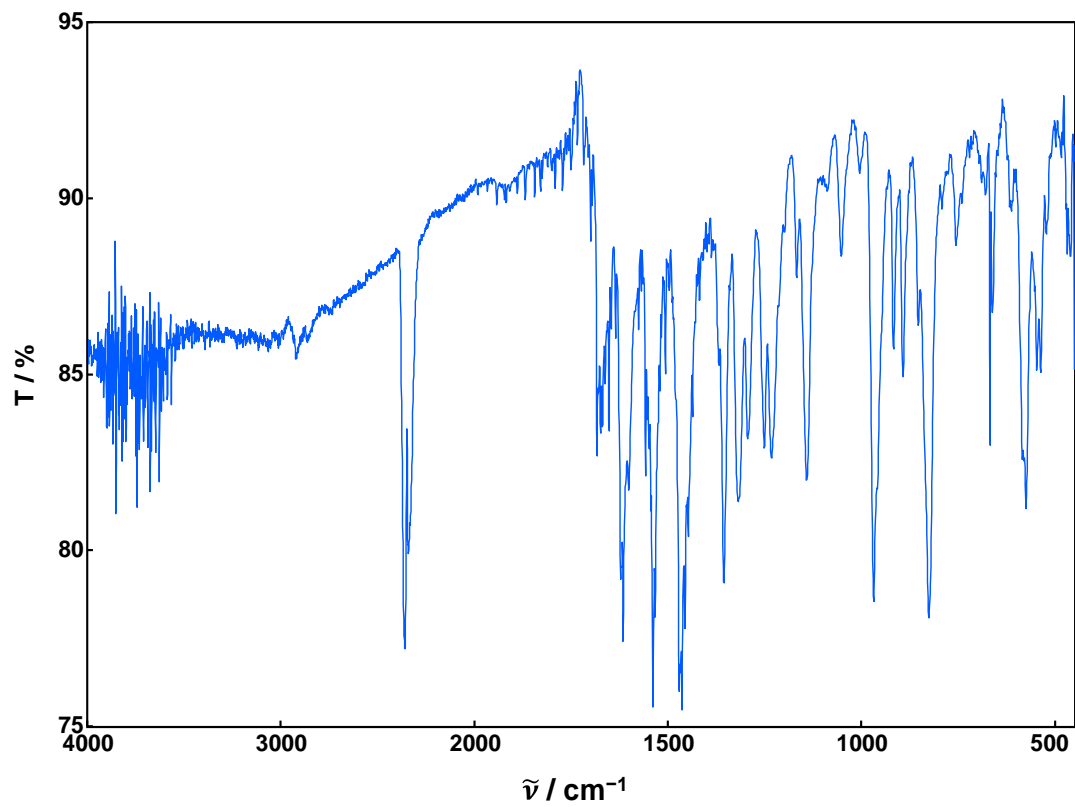

**Figure S6.** IR spectrum of **2**.

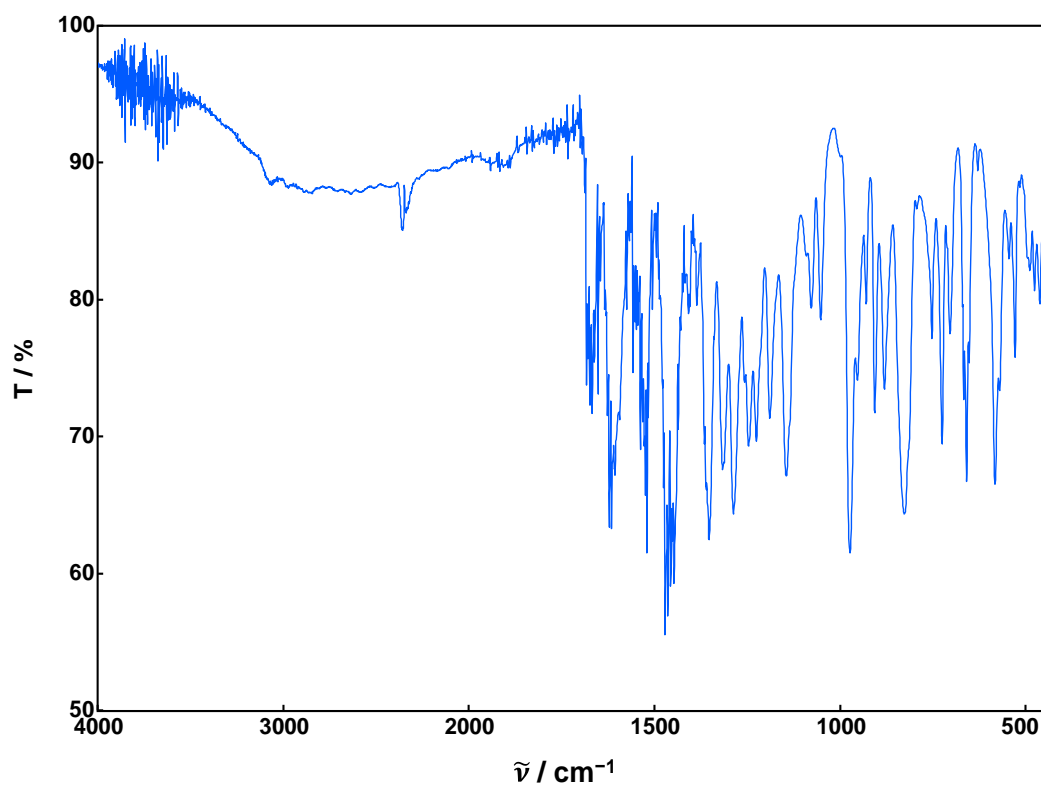

**Figure S7.** IR spectrum of **3**.

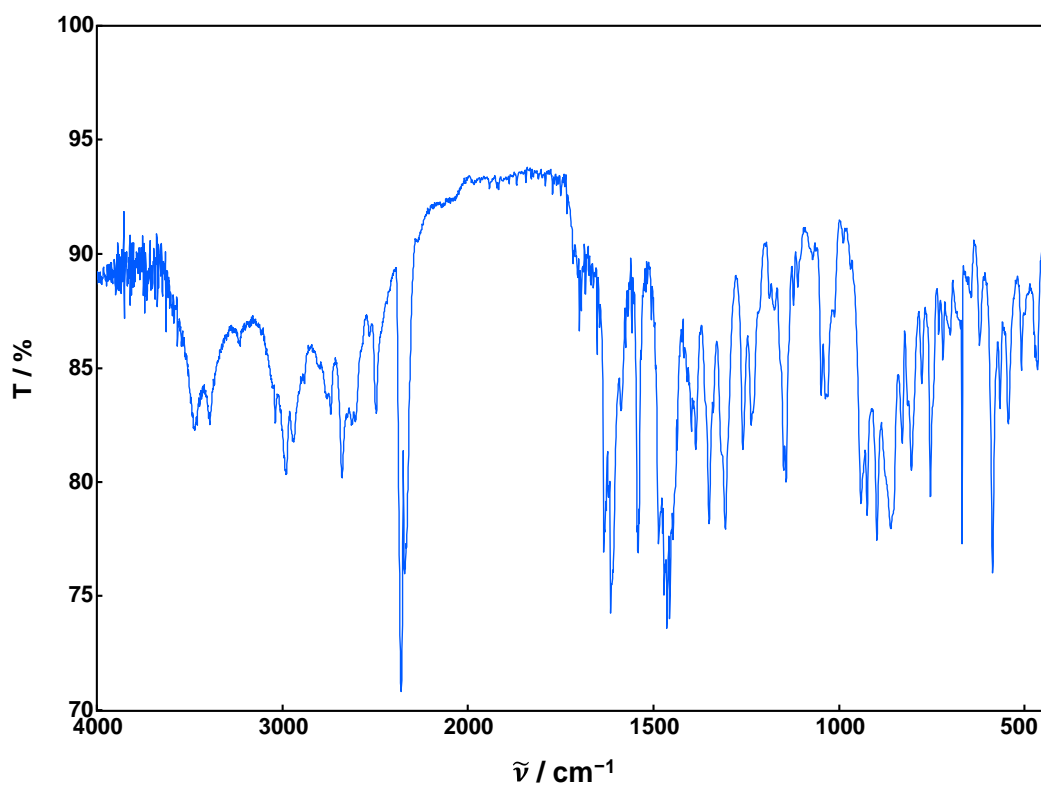

**Figure S8.** IR spectrum of **4**.

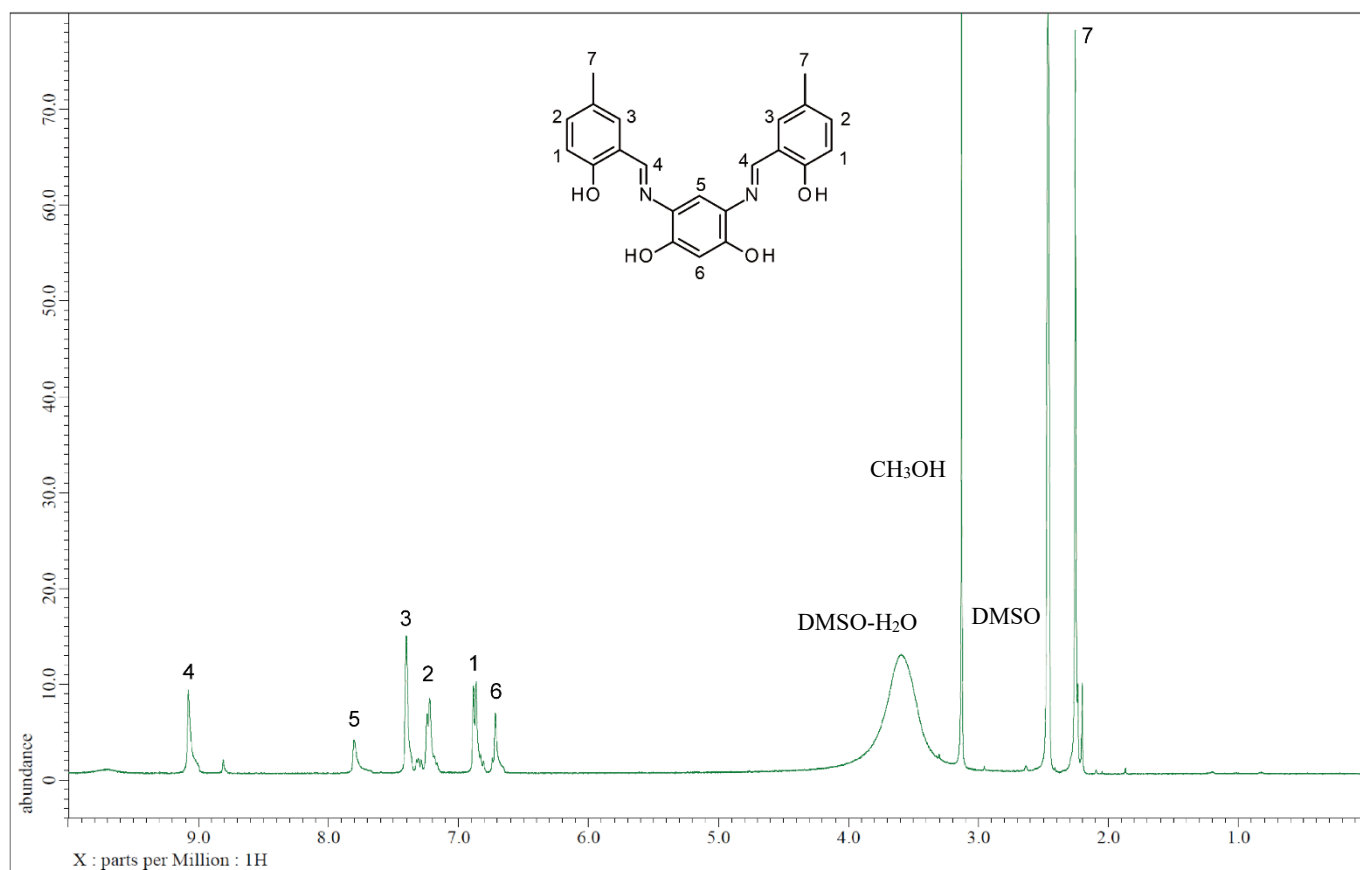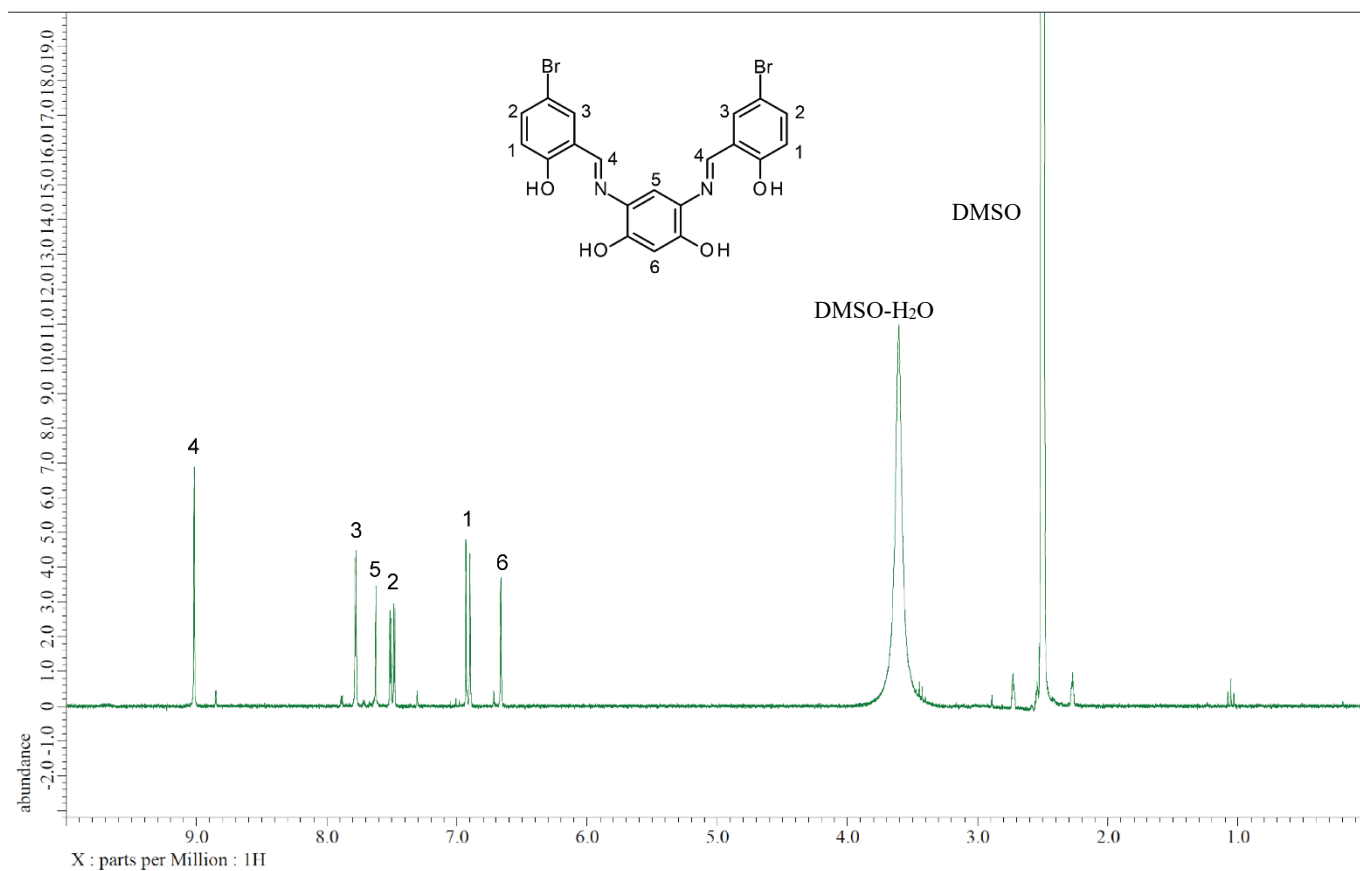

Figure S9.  $^1H$ -NMR Spectra of  $H_4L^{3+3}Me \cdot HCl$  and  $H_4L^{3+3}Br \cdot HCl$  in  $d_6$ -DMSO.

## Complex 1

### checkCIF/PLATON report

Structure factors have been supplied for datablock(s) VO3L5-H3

THIS REPORT IS FOR GUIDANCE ONLY. IF USED AS PART OF A REVIEW PROCEDURE FOR PUBLICATION, IT SHOULD NOT REPLACE THE EXPERTISE OF AN EXPERIENCED CRYSTALLOGRAPHIC REFEREE.

No syntax errors found.      CIF dictionary      Interpreting this report

### Datablock: VO3L5-H3

---

|                        |                                  |                                      |
|------------------------|----------------------------------|--------------------------------------|
| Bond precision:        | C-C = 0.0050 Å                   | Wavelength=0.71075                   |
| Cell:                  | a=12.465 (5)                     | b=16.244 (6)      c=18.285 (8)       |
|                        | alpha=102.99 (3)                 | beta=98.16 (3)      gamma=108.59 (3) |
| Temperature:           | 113 K                            |                                      |
|                        | Calculated                       | Reported                             |
| Volume                 | 3327 (3)                         | 3327 (2)                             |
| Space group            | P -1                             | P -1                                 |
| Hall group             | -P 1                             | -P 1                                 |
| Moiety formula         | C60 H33 N6 O15 V3 [+<br>solvent] | C60 H33 N6 O15 V3, [+<br>solventS]   |
| Sum formula            | C60 H33 N6 O15 V3 [+<br>solvent] | C60 H33 N6 O15 V3                    |
| Mr                     | 1230.75                          | 1230.74                              |
| Dx, g cm <sup>-3</sup> | 1.229                            | 1.229                                |
| Z                      | 2                                | 2                                    |
| Mu (mm <sup>-1</sup> ) | 0.476                            | 0.476                                |
| F000                   | 1248.0                           | 1248.0                               |
| F000'                  | 1250.39                          |                                      |
| h, k, lmax             | 16, 21, 23                       | 16, 20, 23                           |
| Nref                   | 15151                            | 14423                                |
| Tmin, Tmax             | 0.923, 0.963                     | 0.868, 1.000                         |
| Tmin'                  | 0.901                            |                                      |

Correction method= # Reported T Limits: Tmin=0.868 Tmax=1.000  
AbsCorr = MULTI-SCAN

Data completeness= 0.952      Theta (max)= 27.419

R(reflections)= 0.0568( 8693)

wR2(reflections)=  
0.1766( 14423)

S = 0.949

Npar= 758

---

The following ALERTS were generated. Each ALERT has the format

**test-name\_ALERT\_alert-type\_alert-level.**

Click on the hyperlinks for more details of the test.

---

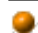

#### Alert level B

PLAT910\_ALERT\_3\_B Missing # of FCF Reflection(s) Below Theta(Min). 22 Note

|   |    |    |    |    |    |    |    |    |    |    |    |    |    |    |    |    |    |
|---|----|----|----|----|----|----|----|----|----|----|----|----|----|----|----|----|----|
| 1 | 0  | 0, | -1 | 1  | 0, | 0  | 1  | 0, | 1  | 1  | 0, | -1 | 2  | 0, | 0  | 2  | 0, |
| 0 | -2 | 1, | 1  | -2 | 1, | -1 | -1 | 1, | 0  | -1 | 1, | 1  | -1 | 1, | -1 | 0  | 1, |
| 0 | 0  | 1, | 1  | 0  | 1, | -1 | 1  | 1, | 0  | 1  | 1, | -1 | -1 | 2, | 0  | -1 | 2, |
| 1 | -1 | 2, | -1 | 0  | 2, | 0  | 0  | 2, | -1 | 1  | 2, |    |    |    |    |    |    |

**Author Response: Low-angle reflections rejected because of beam stop and high background scattering.**

---

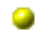

#### Alert level C

ABSTY02\_ALERT\_1\_C An \_exptl\_absorpt\_correction\_type has been given without a literature citation. This should be contained in the \_exptl\_absorpt\_process\_details field.

Absorption correction given as multi-scan

CRYSC01\_ALERT\_1\_C The word below has not been recognised as a standard identifier.  
dull

CRYSC01\_ALERT\_1\_C The word below has not been recognised as a standard identifier.  
greenish

PLAT029\_ALERT\_3\_C \_diffrn\_measured\_fraction\_theta\_full value Low . 0.978 Why?

PLAT230\_ALERT\_2\_C Hirshfeld Test Diff for C59 --C60 . 7.0 s.u.

PLAT911\_ALERT\_3\_C Missing FCF Refl Between Thmin & STh/L= 0.600 240 Report

|     |    |     |     |    |     |     |    |     |     |    |     |     |    |     |     |    |     |
|-----|----|-----|-----|----|-----|-----|----|-----|-----|----|-----|-----|----|-----|-----|----|-----|
| 2   | 1  | 0,  | -3  | 4  | 0,  | 4   | 4  | 0,  | 3   | -6 | 1,  | 3   | -4 | 1,  | -2  | -3 | 1,  |
| -1  | -3 | 1,  | -3  | -2 | 1,  | -1  | -2 | 1,  | -3  | -1 | 1,  | -2  | -1 | 1,  | 3   | 0  | 1,  |
| 5   | 0  | 1,  | 0   | 2  | 1,  | 0   | 3  | 1,  | 5   | -1 | 2,  | -1  | 4  | 2,  | 0   | -4 | 3,  |
| -2  | 0  | 3,  | -1  | 0  | 3,  | -2  | 6  | 3,  | 0   | -2 | 4,  | -4  | -1 | 4,  | -1  | -2 | 5,  |
| 0   | -2 | 5,  | 8   | -2 | 5,  | 6   | -4 | 6,  | -8  | 0  | 6,  | -3  | 3  | 6,  | -6  | 11 | 6,  |
| 1   | -4 | 8,  | -12 | 1  | 8,  | -13 | 1  | 10, | -14 | 4  | 10, | -14 | 5  | 10, | -13 | 1  | 11, |
| -12 | 2  | 11, | -13 | 4  | 11, | -13 | 1  | 12, | -13 | 2  | 12, | -12 | 2  | 12, | -13 | 3  | 12, |
| -12 | 3  | 12, | -13 | 4  | 12, | -13 | 5  | 12, | -13 | 6  | 12, | -13 | 1  | 13, | -13 | 2  | 13, |
| -12 | 2  | 13, | -13 | 3  | 13, | -12 | 3  | 13, | -11 | 3  | 13, | -13 | 4  | 13, | -12 | 4  | 13, |
| -13 | 5  | 13, | -12 | 5  | 13, | -11 | -1 | 14, | -12 | 1  | 14, | -12 | 2  | 14, | -11 | 2  | 14, |
| -12 | 3  | 14, | -11 | 3  | 14, | -10 | 3  | 14, | -12 | 4  | 14, | -11 | 4  | 14, | -12 | 5  | 14, |
| -11 | 5  | 14, | -12 | 6  | 14, | -12 | 7  | 14, | -1  | -7 | 15, | -12 | 0  | 15, | -12 | 1  | 15, |
| -11 | 1  | 15, | -10 | 1  | 15, | -12 | 2  | 15, | -11 | 2  | 15, | -10 | 2  | 15, | -9  | 2  | 15, |
| -12 | 3  | 15, | -11 | 3  | 15, | -10 | 3  | 15, | -9  | 3  | 15, | -12 | 4  | 15, | -11 | 4  | 15, |
| -10 | 4  | 15, | -11 | 5  | 15, | -11 | 6  | 15, | -11 | 7  | 15, | -11 | 0  | 16, | -10 | 0  | 16, |
| -11 | 1  | 16, | -10 | 1  | 16, | -9  | 1  | 16, | -8  | 1  | 16, | -7  | 1  | 16, | -11 | 2  | 16, |

PLAT913\_ALERT\_3\_C Missing # of Very Strong Reflections in FCF .... 6 Note

|    |    |    |    |    |    |    |    |    |   |    |    |    |   |    |   |    |    |
|----|----|----|----|----|----|----|----|----|---|----|----|----|---|----|---|----|----|
| -3 | -2 | 1, | -3 | -1 | 1, | -1 | -1 | 1, | 0 | -1 | 1, | -1 | 4 | 2, | 0 | -2 | 5, |
|----|----|----|----|----|----|----|----|----|---|----|----|----|---|----|---|----|----|



---

### Alert level G

PLAT042\_ALERT\_1\_G Calc. and Reported MoietyFormula Strings Differ Please Check  
Calc: C60 H33 N6 O15 V3  
Rep.: C60 H33 N6 O15 V3,

PLAT154\_ALERT\_1\_G The s.u.'s on the Cell Angles are Equal ..(Note) 0.03 Degree  
PLAT232\_ALERT\_2\_G Hirshfeld Test Diff (M-X) V3 --O10 . 5.7 s.u.  
PLAT398\_ALERT\_2\_G Deviating C-O-C Angle From 120 for O3 . 104.6 Degree  
PLAT398\_ALERT\_2\_G Deviating C-O-C Angle From 120 for O7 . 104.5 Degree  
PLAT398\_ALERT\_2\_G Deviating C-O-C Angle From 120 for O11 . 103.6 Degree  
PLAT606\_ALERT\_4\_G Solvent Accessible VOID(S) in Structure ..... ! Info  
PLAT794\_ALERT\_5\_G Tentative Bond Valency for V1 (V) . 5.01 Info  
PLAT794\_ALERT\_5\_G Tentative Bond Valency for V2 (V) . 5.08 Info  
PLAT794\_ALERT\_5\_G Tentative Bond Valency for V3 (V) . 5.10 Info  
PLAT795\_ALERT\_4\_G C-Atom in CIF Coordinate List Out-of-Sequence .. C52 Note  
PLAT796\_ALERT\_4\_G O-Atom in CIF Coordinate List Out-of-Sequence .. O10 Note  
PLAT797\_ALERT\_4\_G N-Atom in CIF Coordinate List Out-of-Sequence .. N5 Note  
PLAT868\_ALERT\_4\_G ALERTS Due to the Use of \_smtbx\_masks Suppressed ! Info  
PLAT912\_ALERT\_4\_G Missing # of FCF Reflections Above STh/L= 0.600 466 Note  
PLAT933\_ALERT\_2\_G Number of HKL-OMIT Records in Embedded .res File 8 Note  
0 3 1, 5 0 1, -2 -1 1, -1 -3 1, 5 -1 2, -3 4 0,  
3 -6 1, 3 -4 1,

PLAT941\_ALERT\_3\_G Average HKL Measurement Multiplicity ..... 1.9 Low  
PLAT969\_ALERT\_5\_G The 'Henn et al.' R-Factor-gap value ..... 2.92 Note  
Predicted wR2: Based on SigI\*\*2 6.06 or SHELX Weight 19.12

PLAT978\_ALERT\_2\_G Number C-C Bonds with Positive Residual Density. 0 Info

- 
- 0 **ALERT level A** = Most likely a serious problem - resolve or explain  
1 **ALERT level B** = A potentially serious problem, consider carefully  
7 **ALERT level C** = Check. Ensure it is not caused by an omission or oversight  
19 **ALERT level G** = General information/check it is not something unexpected

- 5 ALERT type 1 CIF construction/syntax error, inconsistent or missing data  
7 ALERT type 2 Indicator that the structure model may be wrong or deficient  
5 ALERT type 3 Indicator that the structure quality may be low  
6 ALERT type 4 Improvement, methodology, query or suggestion  
4 ALERT type 5 Informative message, check
- 

## checkCIF publication errors

---

### Alert level A

PUBL002\_ALERT\_1\_A The contact author's address is missing,  
\_publ\_contact\_author\_address.

PUBL006\_ALERT\_1\_A \_publ\_requested\_journal is missing  
e.g. 'Acta Crystallographica Section C'

PUBL008\_ALERT\_1\_A \_publ\_section\_title is missing. Title of paper.

PUBL009\_ALERT\_1\_A \_publ\_author\_name is missing. List of author(s) name(s).

PUBL010\_ALERT\_1\_A \_publ\_author\_address is missing. Author(s) address(es).

PUBL012\_ALERT\_1\_A \_publ\_section\_abstract is missing.  
Abstract of paper in English.

---

6 **ALERT level A** = Data missing that is essential or data in wrong format  
0 **ALERT level G** = General alerts. Data that may be required is missing

---

## Publication of your CIF

You should attempt to resolve as many as possible of the alerts in all categories. Often the minor alerts point to easily fixed oversights, errors and omissions in your CIF or refinement strategy, so attention to these fine details can be worthwhile. In order to resolve some of the more serious problems it may be necessary to carry out additional measurements or structure refinements. However, the nature of your study may justify the reported deviations from journal submission requirements and the more serious of these should be commented upon in the discussion or experimental section of a paper or in the "special\_details" fields of the CIF. *checkCIF* was carefully designed to identify outliers and unusual parameters, but every test has its limitations and alerts that are not important in a particular case may appear. Conversely, the absence of alerts does not guarantee there are no aspects of the results needing attention. It is up to the individual to critically assess their own results and, if necessary, seek expert advice.

If level A alerts remain, which you believe to be justified deviations, and you intend to submit this CIF for publication in a journal, you should additionally insert an explanation in your CIF using the Validation Reply Form (VRF) below. This will allow your explanation to be considered as part of the review process.

## Validation response form

Please find below a validation response form (VRF) that can be filled in and pasted into your CIF.

```
# start Validation Reply Form
_vrf_PUBL002_GLOBAL
;
PROBLEM: The contact author's address is missing,
RESPONSE: ...
;
_vrf_PUBL006_GLOBAL
;
PROBLEM: _publ_requested_journal is missing
RESPONSE: ...
;
_vrf_PUBL008_GLOBAL
;
PROBLEM: _publ_section_title is missing. Title of paper.
RESPONSE: ...
;
_vrf_PUBL009_GLOBAL
;
PROBLEM: _publ_author_name is missing. List of author(s) name(s).
RESPONSE: ...
;
_vrf_PUBL010_GLOBAL
;
PROBLEM: _publ_author_address is missing. Author(s) address(es).
RESPONSE: ...
```

```

;
_vrf_PUBL012_GLOBAL
;
PROBLEM: _publ_section_abstract is missing.
RESPONSE: ...
;
# end Validation Reply Form

```

If you wish to submit your CIF for publication in Acta Crystallographica Section C or E, you should upload your CIF via the web. If you wish to submit your CIF for publication in IUCrData you should upload your CIF via the web. If your CIF is to form part of a submission to another IUCr journal, you will be asked, either during electronic submission or by the Co-editor handling your paper, to upload your CIF via our web site.

---

**PLATON version of 06/01/2024; check.def file version of 05/01/2024**

Datablock VO3L5-H3 - ellipsoid plot

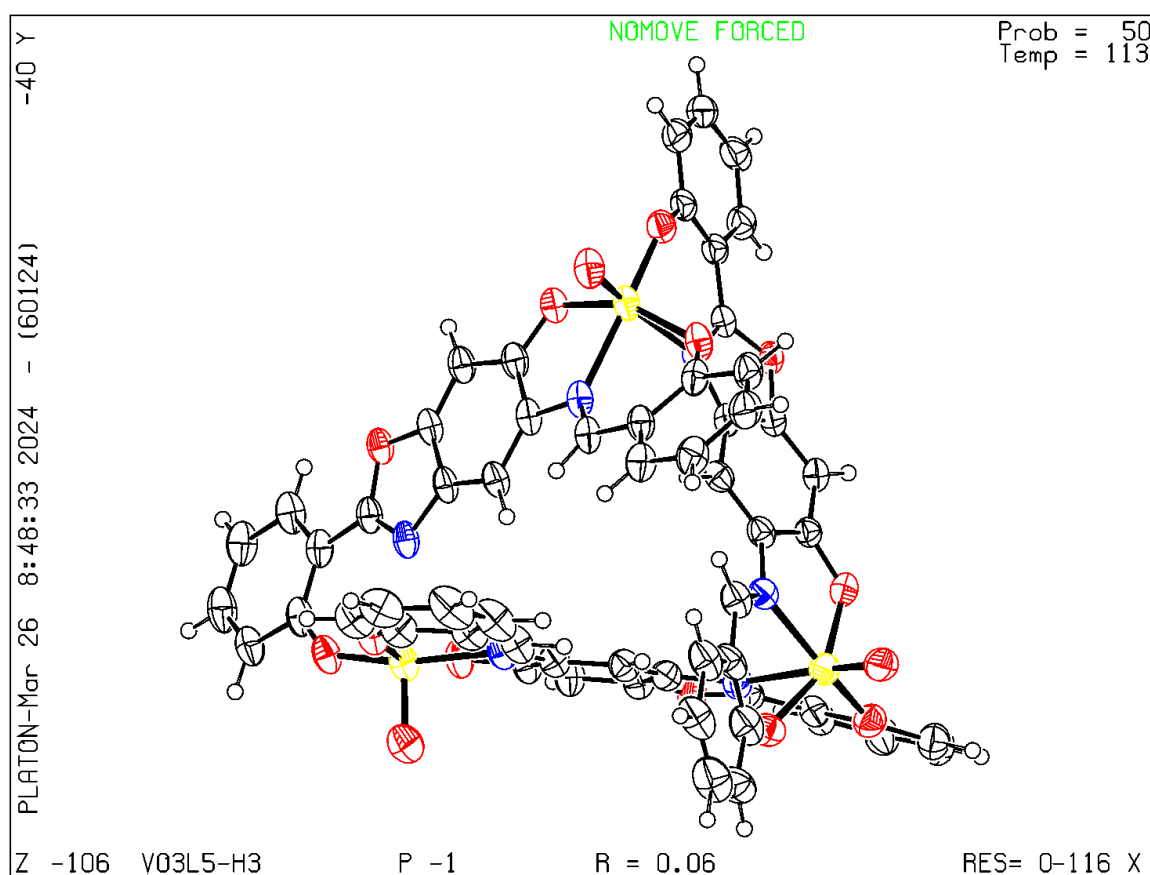

## Complex 2

### checkCIF/PLATON report

Structure factors have been supplied for datablock(s) VO\_L5-Me\_

THIS REPORT IS FOR GUIDANCE ONLY. IF USED AS PART OF A REVIEW PROCEDURE FOR PUBLICATION, IT SHOULD NOT REPLACE THE EXPERTISE OF AN EXPERIENCED CRYSTALLOGRAPHIC REFEREE.

No syntax errors found.      CIF dictionary      Interpreting this report

### Datablock: VO\_L5-Me\_

---

|                        |                                                   |                                |                                 |
|------------------------|---------------------------------------------------|--------------------------------|---------------------------------|
| Bond precision:        | C-C = 0.0189 Å                                    | Wavelength=0.71069             |                                 |
| Cell:                  | a=15.307 (5)<br>alpha=87.11 (2)                   | b=15.582 (5)<br>beta=69.06 (2) | c=18.458 (5)<br>gamma=79.74 (3) |
| Temperature:           | 292 K                                             |                                |                                 |
|                        | Calculated                                        | Reported                       |                                 |
| Volume                 | 4046 (2)                                          | 4045 (2)                       |                                 |
| Space group            | P -1                                              | P -1                           |                                 |
| Hall group             | -P 1                                              | -P 1                           |                                 |
| Moiety formula         | C66 H45 N6 O15 V3, 2 (C2 H3 N), 2 (O) [+ solvent] | C70 H48 N8 O19 V3              |                                 |
| Sum formula            | C70 H51 N8 O17 V3 [+ solvent]                     | C70 H48 N8 O19 V3              |                                 |
| Mr                     | 1429.01                                           | 1458.02                        |                                 |
| Dx, g cm <sup>-3</sup> | 1.173                                             | 1.197                          |                                 |
| Z                      | 2                                                 | 2                              |                                 |
| Mu (mm <sup>-1</sup> ) | 0.403                                             | 0.406                          |                                 |
| F000                   | 1464.0                                            | 1490.0                         |                                 |
| F000'                  | 1466.48                                           |                                |                                 |
| h, k, lmax             | 18, 18, 21                                        | 18, 16, 21                     |                                 |
| Nref                   | 14216                                             | 10895                          |                                 |
| Tmin, Tmax             | 0.864, 0.960                                      | 0.885, 0.960                   |                                 |
| Tmin'                  | 0.694                                             |                                |                                 |

Correction method= # Reported T Limits: Tmin=0.885 Tmax=0.960  
AbsCorr = PSI-SCAN

Data completeness= 0.766      Theta (max)= 24.985

R(reflections)= 0.0858( 3661)

wR2(reflections)=  
0.3156( 10895)

S = 0.927

Npar= 863

---

The following ALERTS were generated. Each ALERT has the format  
**test-name\_ALERT\_alert-type\_alert-level.**  
Click on the hyperlinks for more details of the test.

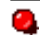

#### Alert level A

PLAT029\_ALERT\_3\_A \_diffn\_measured\_fraction\_theta\_full value Low . 0.766 Why?

**Author Response: Low diffraction was observed for this crystal and was especially low for high angles. Due to the presence of numerous solvent molecules within the crystals, efflorescence of the crystals occurs during the reflection measurements.**

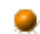

#### Alert level B

PLAT026\_ALERT\_3\_B Ratio Observed / Unique Reflections (too) Low .. 34% Check

**Author Response: Low diffraction was observed for this crystal and was especially low for high angles. Low diffraction is also a consequence of disorder present in some solvent molecules. The final structure was satisfactory for confirming the desired chemical information.**

PLAT341\_ALERT\_3\_B Low Bond Precision on C-C Bonds ..... 0.01891 Ang.

**Author Response: Due to low diffraction and solvent disorder, sufficient refinement could not be achieved, making it impossible to discuss bond distances, etc. However, we utilized this data only to understand the general shape of the molecular structure.**

PLAT910\_ALERT\_3\_B Missing # of FCF Reflection(s) Below Theta(Min). 15 Note

|   |    |    |   |    |    |   |   |    |   |    |    |    |    |    |    |   |    |
|---|----|----|---|----|----|---|---|----|---|----|----|----|----|----|----|---|----|
| 0 | 1  | 0, | 1 | -1 | 0, | 1 | 0 | 0, | 1 | 1  | 0, | -1 | -1 | 1, | -1 | 0 | 1, |
| 0 | -1 | 1, | 0 | 0  | 1, | 0 | 1 | 1, | 1 | -1 | 1, | 1  | 0  | 1, | 1  | 1 | 1, |
| 0 | 0  | 2, | 1 | 0  | 2, | 1 | 1 | 2, |   |    |    |    |    |    |    |   |    |

**Author Response: Low diffraction was observed for this crystal and was especially low for high angles. Due to the presence of numerous solvent molecules within the crystals, efflorescence of the crystals occurs during the reflection measurements.**

PLAT911\_ALERT\_3\_B Missing FCF Refl Between Thmin & STh/L= 0.594 3062 Report

|        |    |        |      |        |      |        |     |        |     |        |      |    |
|--------|----|--------|------|--------|------|--------|-----|--------|-----|--------|------|----|
| 0      | 4  | 0,     | 2-16 | 0,     | 2 -1 | 0,     | 2 4 | 0,     | 2 5 | 0,     | 3-16 | 0, |
| 4-16   | 0, | 5-16   | 0,   | 5-15   | 0,   | 6-15   | 0,  | 7-15   | 0,  | 7-14   | 0,   |    |
| 8-14   | 0, | 8-13   | 0,   | 8 16   | 0,   | 9-13   | 0,  | 9-12   | 0,  | 9 16   | 0,   |    |
| 10-12  | 0, | 10-11  | 0,   | 10 15  | 0,   | 10 16  | 0,  | 11-11  | 0,  | 11-10  | 0,   |    |
| 11 14  | 0, | 11 15  | 0,   | 12-10  | 0,   | 12 -9  | 0,  | 12 13  | 0,  | 12 14  | 0,   |    |
| 12 15  | 0, | 13 -9  | 0,   | 13 -8  | 0,   | 13 -7  | 0,  | 13 12  | 0,  | 13 13  | 0,   |    |
| 13 14  | 0, | 14 -7  | 0,   | 14 -6  | 0,   | 14 -5  | 0,  | 14 10  | 0,  | 14 11  | 0,   |    |
| 14 12  | 0, | 15 -5  | 0,   | 15 -4  | 0,   | 15 -3  | 0,  | 15 -2  | 0,  | 15 7   | 0,   |    |
| 15 8   | 0, | 15 9   | 0,   | 15 10  | 0,   | 15 11  | 0,  | 16 -3  | 0,  | 16 -2  | 0,   |    |
| 16 2   | 0, | 16 3   | 0,   | 16 4   | 0,   | 16 5   | 0,  | 16 6   | 0,  | 16 7   | 0,   |    |
| 16 8   | 0, | 16 9   | 0,   | -16 -8 | 1,   | -16 -7 | 1,  | -16 -6 | 1,  | -16 -5 | 1,   |    |
| -16 -4 | 1, | -16 -3 | 1,   | -16 -2 | 1,   | -16 2  | 1,  | -15-10 | 1,  | -15 -9 | 1,   |    |
| -15 -8 | 1, | -15 -7 | 1,   | -15 -6 | 1,   | -15 -5 | 1,  | -15 2  | 1,  | -15 3  | 1,   |    |
| -15 4  | 1, | -15 5  | 1,   | -14-12 | 1,   | -14-11 | 1,  | -14-10 | 1,  | -14 -9 | 1,   |    |
| -14 4  | 1, | -14 5  | 1,   | -14 6  | 1,   | -14 7  | 1,  | -13-13 | 1,  | -13-12 | 1,   |    |
| -13-11 | 1, | -13 6  | 1,   | -13 7  | 1,   | -13 8  | 1,  | -12-14 | 1,  | -12-13 | 1,   |    |

**Author Response: Low diffraction was observed for this crystal and was especially low for high angles. Due to the presence of numerous solvent molecules within the crystals, efflorescence of the crystals occurs during the reflection measurements.**

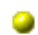

#### Alert level C

|                                                                    |                |
|--------------------------------------------------------------------|----------------|
| PLAT084_ALERT_3_C High wR2 Value (i.e. > 0.25) .....               | 0.32 Report    |
| PLAT094_ALERT_2_C Ratio of Maximum / Minimum Residual Density .... | 2.09 Report    |
| PLAT202_ALERT_3_C Isotropic non-H Atoms in Anion/Solvent .....     | 7 Check        |
| N7 C67 C68 N8 C69 C70 O17B                                         |                |
| PLAT220_ALERT_2_C NonSolvent Resd 1 C Ueq(max)/Ueq(min) Range      | 3.3 Ratio      |
| PLAT241_ALERT_2_C High 'MainMol' Ueq as Compared to Neighbors of   | C25 Check      |
| PLAT241_ALERT_2_C High 'MainMol' Ueq as Compared to Neighbors of   | C62 Check      |
| PLAT242_ALERT_2_C Low 'MainMol' Ueq as Compared to Neighbors of    | C61 Check      |
| PLAT244_ALERT_4_C Low 'Solvent' Ueq as Compared to Neighbors of    | C68 Check      |
| PLAT244_ALERT_4_C Low 'Solvent' Ueq as Compared to Neighbors of    | C70 Check      |
| PLAT905_ALERT_3_C Negative K value in the Analysis of Variance ... | -30.630 Report |
| PLAT905_ALERT_3_C Negative K value in the Analysis of Variance ... | -1.696 Report  |
| PLAT918_ALERT_3_C Reflection(s) with I(obs) much Smaller I(calc) . | 2 Check        |
| PLAT975_ALERT_2_C Check Calcd Resid. Dens. 0.88Ang From O16B .     | 0.67 eA-3      |
| PLAT975_ALERT_2_C Check Calcd Resid. Dens. 1.05Ang From O16A .     | 0.66 eA-3      |
| PLAT975_ALERT_2_C Check Calcd Resid. Dens. 0.96Ang From O16B .     | 0.65 eA-3      |
| PLAT975_ALERT_2_C Check Calcd Resid. Dens. 0.85Ang From O16B .     | 0.64 eA-3      |
| PLAT975_ALERT_2_C Check Calcd Resid. Dens. 1.00Ang From O16C .     | 0.56 eA-3      |
| PLAT975_ALERT_2_C Check Calcd Resid. Dens. 1.08Ang From O16C .     | 0.54 eA-3      |
| PLAT975_ALERT_2_C Check Calcd Resid. Dens. 0.73Ang From O16A .     | 0.54 eA-3      |
| PLAT975_ALERT_2_C Check Calcd Resid. Dens. 1.07Ang From O16C .     | 0.53 eA-3      |
| PLAT975_ALERT_2_C Check Calcd Resid. Dens. 0.65Ang From O16C .     | 0.49 eA-3      |
| PLAT975_ALERT_2_C Check Calcd Resid. Dens. 0.83Ang From O16C .     | 0.48 eA-3      |

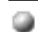

#### Alert level G

FORMU01\_ALERT\_2\_G There is a discrepancy between the atom counts in the  
\_chemical\_formula\_sum and the formula from the \_atom\_site\* data.

Atom count from \_chemical\_formula\_sum: C70 H48 N8 O19 V3  
 Atom count from the \_atom\_site data: C70 H51 N8 O17 V3  
 CELLZ01\_ALERT\_1\_G Difference between formula and atom\_site contents detected.  
 CELLZ01\_ALERT\_1\_G ALERT: Large difference may be due to a  
 symmetry error - see SYMMG tests  
 From the CIF: \_cell\_formula\_units\_Z 2  
 From the CIF: \_chemical\_formula\_sum C70 H48 N8 O19 V3  
 TEST: Compare cell contents of formula and atom\_site data

| atom | Z*formula | cif sites | diff  |
|------|-----------|-----------|-------|
| C    | 140.00    | 140.00    | 0.00  |
| H    | 96.00     | 102.00    | -6.00 |
| N    | 16.00     | 16.00     | 0.00  |
| O    | 38.00     | 34.00     | 4.00  |
| V    | 6.00      | 6.00      | 0.00  |

CHEMS02\_ALERT\_1\_G Please check that you have entered the correct  
 \_publ\_requested\_category classification of your compound;  
 FI or CI or EI for inorganic; FM or CM or EM for metal-organic;  
 FO or CO or EO for organic.  
 From the CIF: \_publ\_requested\_category CHOOSE FI FM FO CI CM CO or A  
 From the CIF: \_chemical\_formula\_sum :C70 H48 N8 O19 V3

PLAT002\_ALERT\_2\_G Number of Distance or Angle Restraints on AtSite 6 Note  
 PLAT041\_ALERT\_1\_G Calc. and Reported SumFormula Strings Differ Please Check  
 Calc: C70 H51 N8 O17 V3  
 Rep.: C70 H48 N8 O19 V3

PLAT042\_ALERT\_1\_G Calc. and Reported MoietyFormula Strings Differ Please Check  
 Calc: C66 H45 N6 O15 V3, 2(C2 H3 N), 2(O)  
 Rep.: C70 H48 N8 O19 V3

PLAT063\_ALERT\_4\_G Crystal Size Possibly too Large for Beam Size .. 0.90 mm  
 PLAT072\_ALERT\_2\_G SHELXL First Parameter in WGHT Unusually Large 0.17 Report  
 PLAT172\_ALERT\_4\_G The CIF-Embedded .res File Contains DFIX Records 4 Report  
 PLAT173\_ALERT\_4\_G The CIF-Embedded .res File Contains DANG Records 2 Report  
 PLAT187\_ALERT\_4\_G The CIF-Embedded .res File Contains RIGU Records 1 Report  
 PLAT300\_ALERT\_4\_G Atom Site Occupancy of O17B Constrained at 0.55 Check  
 PLAT300\_ALERT\_4\_G Atom Site Occupancy of O16A Constrained at 0.4 Check  
 PLAT300\_ALERT\_4\_G Atom Site Occupancy of O16B Constrained at 0.4 Check  
 PLAT300\_ALERT\_4\_G Atom Site Occupancy of O16C Constrained at 0.2 Check  
 PLAT300\_ALERT\_4\_G Atom Site Occupancy of O17A Constrained at 0.45 Check  
 PLAT302\_ALERT\_4\_G Anion/Solvent/Minor-Residue Disorder (Resd 4) 100% Note  
 PLAT302\_ALERT\_4\_G Anion/Solvent/Minor-Residue Disorder (Resd 5) 100% Note  
 PLAT302\_ALERT\_4\_G Anion/Solvent/Minor-Residue Disorder (Resd 6) 100% Note  
 PLAT302\_ALERT\_4\_G Anion/Solvent/Minor-Residue Disorder (Resd 7) 100% Note  
 PLAT302\_ALERT\_4\_G Anion/Solvent/Minor-Residue Disorder (Resd 8) 100% Note  
 PLAT304\_ALERT\_4\_G Non-Integer Number of Atoms in ..... (Resd 4) 0.55 Check  
 PLAT304\_ALERT\_4\_G Non-Integer Number of Atoms in ..... (Resd 5) 0.40 Check  
 PLAT304\_ALERT\_4\_G Non-Integer Number of Atoms in ..... (Resd 6) 0.40 Check  
 PLAT304\_ALERT\_4\_G Non-Integer Number of Atoms in ..... (Resd 7) 0.20 Check  
 PLAT304\_ALERT\_4\_G Non-Integer Number of Atoms in ..... (Resd 8) 0.45 Check  
 PLAT311\_ALERT\_2\_G Isolated Disordered Oxygen Atom (No H's ?) ..... 017B Check  
 PLAT311\_ALERT\_2\_G Isolated Disordered Oxygen Atom (No H's ?) ..... 016A Check  
 PLAT311\_ALERT\_2\_G Isolated Disordered Oxygen Atom (No H's ?) ..... 016B Check  
 PLAT311\_ALERT\_2\_G Isolated Disordered Oxygen Atom (No H's ?) ..... 016C Check  
 PLAT311\_ALERT\_2\_G Isolated Disordered Oxygen Atom (No H's ?) ..... 017A Check  
 PLAT344\_ALERT\_2\_G Unusual sp? Angle Range in Solvent/Ion for C70 Check  
 PLAT367\_ALERT\_2\_G Long? C(sp?)-C(sp?) Bond C69 - C70 . 1.53 Ang.  
 PLAT398\_ALERT\_2\_G Deviating C-O-C Angle From 120 for O3 . 105.1 Degree  
 PLAT398\_ALERT\_2\_G Deviating C-O-C Angle From 120 for O7 . 104.3 Degree

PLAT398\_ALERT\_2\_G Deviating C-O-C Angle From 120 for O11 . 103.6 Degree  
 PLAT606\_ALERT\_4\_G Solvent Accessible VOID(S) in Structure ..... ! Info  
 PLAT790\_ALERT\_4\_G Centre of Gravity not Within Unit Cell: Resd. # 3 Note  
                   C2 H3 N  
 PLAT794\_ALERT\_5\_G Tentative Bond Valency for V1 (V) . 5.28 Info  
 PLAT794\_ALERT\_5\_G Tentative Bond Valency for V2 (V) . 5.09 Info  
 PLAT794\_ALERT\_5\_G Tentative Bond Valency for V3 (V) . 5.21 Info  
 PLAT860\_ALERT\_3\_G Number of Least-Squares Restraints ..... 942 Note  
 PLAT869\_ALERT\_4\_G ALERTS Related to the Use of SQUEEZE Suppressed ! Info  
 PLAT908\_ALERT\_2\_G Max. Perc. Data with I > 2\*s(I) per Res.Shell . 71.97% Note  
 PLAT933\_ALERT\_2\_G Number of HKL-OMIT Records in Embedded .res File 28 Note  
                   0 -2 1, -3 -1 1, -3 0 1, 3 1 2, -1 -1 4, 4 0 1,  
                   3 0 2, 0 0 3, -4 2 2, -2 1 0, 2 -1 2, 0 4 0,  
                   -4 0 1, -2 1 2, 4 1 4, 2 4 0, -2 0 1, 0 1 3,  
                   1 1 2, 4 3 3, 2 0 2, 2 5 0, 3 2 2, 2 5 3,  
                   -1 -1 6, -1 1 4, -1 -5 1, -1 -2 1,  
 PLAT941\_ALERT\_3\_G Average HKL Measurement Multiplicity ..... 1.1 Low  
 PLAT951\_ALERT\_5\_G Calculated (ThMax) and CIF-Reported Kmax Differ 2 Units  
 PLAT957\_ALERT\_1\_G Calculated (ThMax) and Actual (FCF) Kmax Differ 2 Units  
 PLAT969\_ALERT\_5\_G The 'Henn et al.' R-Factor-gap value ..... 4.18 Note  
                   Predicted wR2: Based on SigI\*\*2 7.54 or SHELX Weight 35.48  
 PLAT978\_ALERT\_2\_G Number C-C Bonds with Positive Residual Density. 0 Info

- 
- 1 **ALERT level A** = Most likely a serious problem - resolve or explain  
 4 **ALERT level B** = A potentially serious problem, consider carefully  
 22 **ALERT level C** = Check. Ensure it is not caused by an omission or oversight  
 51 **ALERT level G** = General information/check it is not something unexpected
- 6 ALERT type 1 CIF construction/syntax error, inconsistent or missing data  
 31 ALERT type 2 Indicator that the structure model may be wrong or deficient  
 12 ALERT type 3 Indicator that the structure quality may be low  
 24 ALERT type 4 Improvement, methodology, query or suggestion  
 5 ALERT type 5 Informative message, check
- 

## checkCIF publication errors

---

### Alert level A

PUBL002\_ALERT\_1\_A The contact author's address is missing,  
                   \_publ\_contact\_author\_address.

- 
- 1 **ALERT level A** = Data missing that is essential or data in wrong format  
 0 **ALERT level G** = General alerts. Data that may be required is missing
-



## Publication of your CIF

You should attempt to resolve as many as possible of the alerts in all categories. Often the minor alerts point to easily fixed oversights, errors and omissions in your CIF or refinement strategy, so attention to these fine details can be worthwhile. In order to resolve some of the more serious problems it may be necessary to carry out additional measurements or structure refinements. However, the nature of your study may justify the reported deviations from journal submission requirements and the more serious of these should be commented upon in the discussion or experimental section of a paper or in the "special\_details" fields of the CIF. *checkCIF* was carefully designed to identify outliers and unusual parameters, but every test has its limitations and alerts that are not important in a particular case may appear. Conversely, the absence of alerts does not guarantee there are no aspects of the results needing attention. It is up to the individual to critically assess their own results and, if necessary, seek expert advice.

If level A alerts remain, which you believe to be justified deviations, and you intend to submit this CIF for publication in a journal, you should additionally insert an explanation in your CIF using the Validation Reply Form (VRF) below. This will allow your explanation to be considered as part of the review process.

## Validation response form

Please find below a validation response form (VRF) that can be filled in and pasted into your CIF.

```
# start Validation Reply Form
_vrf_PUBL002_GLOBAL
;
PROBLEM: The contact author's address is missing,
RESPONSE: ...
;
# end Validation Reply Form
```

If you wish to submit your CIF for publication in Acta Crystallographica Section C or E, you should upload your CIF via the web. If you wish to submit your CIF for publication in IUCrData you should upload your CIF via the web. If your CIF is to form part of a submission to another IUCr journal, you will be asked, either during electronic submission or by the Co-editor handling your paper, to upload your CIF via our web site.

Datablock VO\_L5-Me\_ - ellipsoid plot

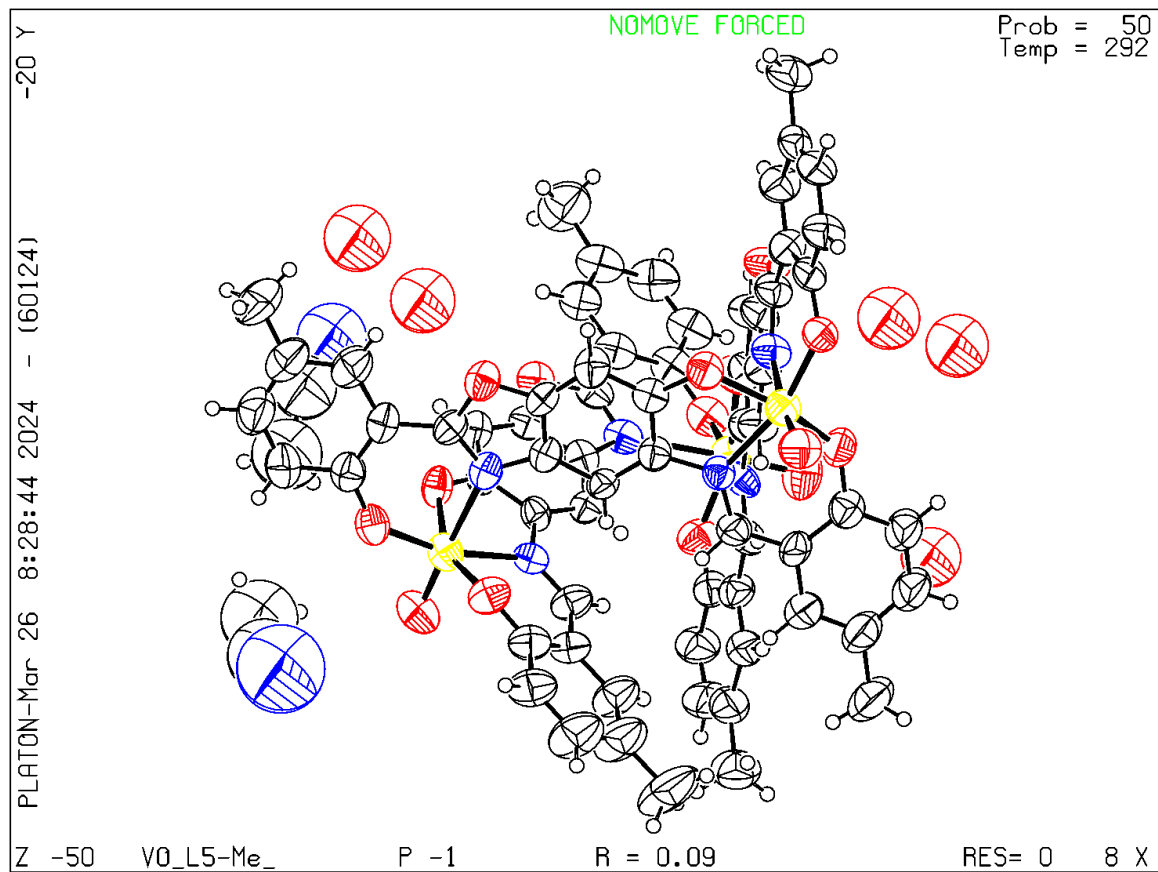

## Complex 4

### checkCIF/PLATON report

Structure factors have been supplied for datablock(s) HNet3VO2L5-H

THIS REPORT IS FOR GUIDANCE ONLY. IF USED AS PART OF A REVIEW PROCEDURE FOR PUBLICATION, IT SHOULD NOT REPLACE THE EXPERTISE OF AN EXPERIENCED CRYSTALLOGRAPHIC REFEREE.

No syntax errors found.      CIF dictionary      Interpreting this report

### Datablock: HNet3VO2L5-H

---

Bond precision:      C-C = 0.0124 Å      Wavelength=0.71069

Cell:                      a=11.978 (3)      b=7.5880 (14)      c=28.042 (5)  
                                alpha=90      beta=101.705 (18)      gamma=90

Temperature:      301 K

|                        | Calculated                | Reported        |
|------------------------|---------------------------|-----------------|
| Volume                 | 2495.7 (9)                | 2495.7 (8)      |
| Space group            | P 21/n                    | P 1 21/n 1      |
| Hall group             | -P 2yn                    | -P 2yn          |
| Moiety formula         | C20 H12 N2 O6 V, C6 H16 N | C26 H28 N3 O6 V |
| Sum formula            | C26 H28 N3 O6 V           | C26 H28 N3 O6 V |
| Mr                     | 529.45                    | 529.47          |
| Dx, g cm <sup>-3</sup> | 1.409                     | 1.409           |
| Z                      | 4                         | 4               |
| Mu (mm <sup>-1</sup> ) | 0.444                     | 0.444           |
| F000                   | 1104.0                    | 1104.0          |
| F000'                  | 1105.69                   |                 |
| h, k, lmax             | 15, 9, 36                 | 15, 9, 36       |
| Nref                   | 5734                      | 5478            |
| Tmin, Tmax             | 0.899, 0.957              |                 |
| Tmin'                  | 0.837                     |                 |

Correction method= Not given

Data completeness= 0.955      Theta (max)= 27.499

R(reflections)= 0.0790 ( 1828)

wR2(reflections)=  
0.3181 ( 5478)

S = 0.947

Npar= 329

---

The following ALERTS were generated. Each ALERT has the format

**test-name\_ALERT\_alert-type\_alert-level.**

Click on the hyperlinks for more details of the test.

---

### Alert level B

PLAT026\_ALERT\_3\_B Ratio Observed / Unique Reflections (too) Low .. 33% Check

**Author Response: Low diffraction was observed for this crystal and was especially low for high angles.**

---

### Alert level C

PLAT042\_ALERT\_1\_C Calc. and Reported MoietyFormula Strings Differ Please Check  
Calc: C20 H12 N2 O6 V, C6 H16 N  
Rep.: C26 H28 N3 O6 V

PLAT084\_ALERT\_3\_C High wr2 Value (i.e. > 0.25) ..... 0.32 Report  
PLAT234\_ALERT\_4\_C Large Hirshfeld Difference C25 --C26 . 0.24 Ang.

PLAT243\_ALERT\_4\_C High 'Solvent' Ueq as Compared to Neighbors of C25 Check  
PLAT244\_ALERT\_4\_C Low 'Solvent' Ueq as Compared to Neighbors of N3 Check  
PLAT244\_ALERT\_4\_C Low 'Solvent' Ueq as Compared to Neighbors of C21 Check  
PLAT245\_ALERT\_2\_C U(iso) H12 Smaller than U(eq) O4 by 0.028 Ang\*\*2  
PLAT260\_ALERT\_2\_C Large Average Ueq of Residue Including N3 0.137 Check  
PLAT341\_ALERT\_3\_C Low Bond Precision on C-C Bonds ..... 0.01243 Ang.  
PLAT360\_ALERT\_2\_C Short C(sp3)-C(sp3) Bond C21 - C22 . 1.42 Ang.  
PLAT360\_ALERT\_2\_C Short C(sp3)-C(sp3) Bond C25 - C26 . 1.39 Ang.

PLAT745\_ALERT\_1\_C D-H Calc 0.77(8), Rep 0.77100 ..... Missing s.u.  
O4 -H12 1\_555 1\_555 ..... # 1 Check

PLAT746\_ALERT\_1\_C H...A Calc 1.98(8), Rep 1.97600 ..... Missing s.u.  
H12 -N2 1\_555 1\_555 ..... # 1 Check

PLAT748\_ALERT\_1\_C D-H..A Calc 148(7), Rep 148.20 ..... Missing s.u.  
O4 -H12 -N2 1\_555 1\_555 1\_555 # 1 Check

PLAT905\_ALERT\_3\_C Negative K value in the Analysis of Variance ... -0.125 Report  
PLAT906\_ALERT\_3\_C Large K Value in the Analysis of Variance ..... 6.440 Check  
PLAT911\_ALERT\_3\_C Missing FCF Refl Between Thmin & STh/L= 0.600 50 Report

0 2 0, 2 0 0, 2 1 0, 2 2 0, -14 1 1, 0 2 1,  
1 1 1, 3 2 1, 5 0 1, -2 0 2, -1 1 2, -1 2 2,  
0 1 2, 2 1 2, 2 3 2, -5 0 3, -3 0 3, -2 1 3,  
-1 1 3, -1 2 3, 2 1 3, 3 0 3, -2 2 4, -1 1 4,  
-1 2 4, 0 2 4, -14 2 5, -12 5 5, -5 0 5, -1 0 5,  
-1 1 5, -14 2 6, -12 5 6, -14 2 7, -14 2 8, -6 4 9,  
-2 2 9, -3 3 11, -14 1 12, -14 1 13, -3 0 13, -14 0 14,  
-13 3 14, -13 3 15, -1 0 15, -12 4 16, -13 2 18, -12 3 20,  
-12 2 22, -12 1 23,

PLAT913\_ALERT\_3\_C Missing # of Very Strong Reflections in FCF .... 4 Note  
2 0 0, -1 2 2, -1 2 3, -1 2 4,

---

### Alert level G

CHEMS02\_ALERT\_1\_G Please check that you have entered the correct  
\_publ\_requested\_category classification of your compound;  
FI or CI or EI for inorganic; FM or CM or EM for metal-organic;  
FO or CO or EO for organic.

From the CIF: `_publ_requested_category` CHOOSE FI FM FO CI CM CO or A  
 From the CIF: `_chemical_formula_sum` :C26 H28 N3 O6 V1

|                   |                                                                                                                                                                                                                                                                                                                                              |              |
|-------------------|----------------------------------------------------------------------------------------------------------------------------------------------------------------------------------------------------------------------------------------------------------------------------------------------------------------------------------------------|--------------|
| PLAT003_ALERT_2_G | Number of Uiso or Uij Restrained non-H Atoms ...                                                                                                                                                                                                                                                                                             | 36 Report    |
| PLAT007_ALERT_5_G | Number of Unrefined Donor-H Atoms .....                                                                                                                                                                                                                                                                                                      | 1 Report     |
|                   | H28                                                                                                                                                                                                                                                                                                                                          |              |
| PLAT072_ALERT_2_G | SHELXL First Parameter in WGHT Unusually Large                                                                                                                                                                                                                                                                                               | 0.16 Report  |
| PLAT177_ALERT_4_G | The CIF-Embedded .res File Contains DELU Records                                                                                                                                                                                                                                                                                             | 1 Report     |
| PLAT398_ALERT_2_G | Deviating C-O-C Angle From 120 for O3 .                                                                                                                                                                                                                                                                                                      | 105.2 Degree |
| PLAT484_ALERT_4_G | Round D-H..A Angle Rep for O4 ..N2 .                                                                                                                                                                                                                                                                                                         | 148 Degree   |
| PLAT484_ALERT_4_G | Round D-H..A Angle Rep for N3 ..O5 .                                                                                                                                                                                                                                                                                                         | 156 Degree   |
| PLAT484_ALERT_4_G | Round D-H..A Angle Rep for N3 ..O6 .                                                                                                                                                                                                                                                                                                         | 128 Degree   |
| PLAT794_ALERT_5_G | Tentative Bond Valency for V1 (V) .                                                                                                                                                                                                                                                                                                          | 5.12 Info    |
| PLAT860_ALERT_3_G | Number of Least-Squares Restraints .....                                                                                                                                                                                                                                                                                                     | 101 Note     |
| PLAT910_ALERT_3_G | Missing # of FCF Reflection(s) Below Theta(Min).<br>-1 0 1, 1 0 1, 0 0 2,                                                                                                                                                                                                                                                                    | 3 Note       |
| PLAT912_ALERT_4_G | Missing # of FCF Reflections Above STh/L= 0.600                                                                                                                                                                                                                                                                                              | 203 Note     |
| PLAT933_ALERT_2_G | Number of HKL-OMIT Records in Embedded .res File<br>-1 2 3, -1 2 2, -1 0 5, -5 0 3, 2 2 0, 0 1 2,<br>-1 1 2, 3 0 3, -1 2 4, 2 1 2, 2 1 0, 2 2 0,<br>-1 1 4, -1 1 5, -2 1 3, 2 3 2, 2 1 3, -1 0 15,<br>0 2 0, -3 0 13, -2 2 4, -2 0 2, 2 1 0, 5 0 1,<br>-3 3 11, -5 0 5, 3 2 1, 0 2 1, -1 1 3, -3 0 3,<br>0 2 4, 1 1 1, 2 0 0, 2 0 0, -2 2 9, | 35 Note      |
| PLAT941_ALERT_3_G | Average HKL Measurement Multiplicity .....                                                                                                                                                                                                                                                                                                   | 1.0 Low      |
| PLAT969_ALERT_5_G | The 'Henn et al.' R-Factor-gap value .....                                                                                                                                                                                                                                                                                                   | 2.34 Note    |
|                   | Predicted wR2: Based on SigI**2 13.58 or SHELX Weight 34.65                                                                                                                                                                                                                                                                                  |              |
| PLAT978_ALERT_2_G | Number C-C Bonds with Positive Residual Density.                                                                                                                                                                                                                                                                                             | 0 Info       |

- 
- 0 **ALERT level A** = Most likely a serious problem - resolve or explain  
 1 **ALERT level B** = A potentially serious problem, consider carefully  
 18 **ALERT level C** = Check. Ensure it is not caused by an omission or oversight  
 17 **ALERT level G** = General information/check it is not something unexpected
- 5 ALERT type 1 CIF construction/syntax error, inconsistent or missing data  
 9 ALERT type 2 Indicator that the structure model may be wrong or deficient  
 10 ALERT type 3 Indicator that the structure quality may be low  
 9 ALERT type 4 Improvement, methodology, query or suggestion  
 3 ALERT type 5 Informative message, check
- 

## checkCIF publication errors

---

### Alert level A

PUBL002\_ALERT\_1\_A The contact author's address is missing,  
`_publ_contact_author_address`.

- 
- 1 **ALERT level A** = Data missing that is essential or data in wrong format  
 0 **ALERT level G** = General alerts. Data that may be required is missing
-

## Publication of your CIF

You should attempt to resolve as many as possible of the alerts in all categories. Often the minor alerts point to easily fixed oversights, errors and omissions in your CIF or refinement strategy, so attention to these fine details can be worthwhile. In order to resolve some of the more serious problems it may be necessary to carry out additional measurements or structure refinements. However, the nature of your study may justify the reported deviations from journal submission requirements and the more serious of these should be commented upon in the discussion or experimental section of a paper or in the "special\_details" fields of the CIF. *checkCIF* was carefully designed to identify outliers and unusual parameters, but every test has its limitations and alerts that are not important in a particular case may appear. Conversely, the absence of alerts does not guarantee there are no aspects of the results needing attention. It is up to the individual to critically assess their own results and, if necessary, seek expert advice.

If level A alerts remain, which you believe to be justified deviations, and you intend to submit this CIF for publication in a journal, you should additionally insert an explanation in your CIF using the Validation Reply Form (VRF) below. This will allow your explanation to be considered as part of the review process.

## Validation response form

Please find below a validation response form (VRF) that can be filled in and pasted into your CIF.

```
# start Validation Reply Form
_vrf_PUBL002_GLOBAL
;
PROBLEM: The contact author's address is missing,
RESPONSE: ...
;
# end Validation Reply Form
```

If you wish to submit your CIF for publication in Acta Crystallographica Section C or E, you should upload your CIF via the web. If you wish to submit your CIF for publication in IUCrData you should upload your CIF via the web. If your CIF is to form part of a submission to another IUCr journal, you will be asked, either during electronic submission or by the Co-editor handling your paper, to upload your CIF via our web site.

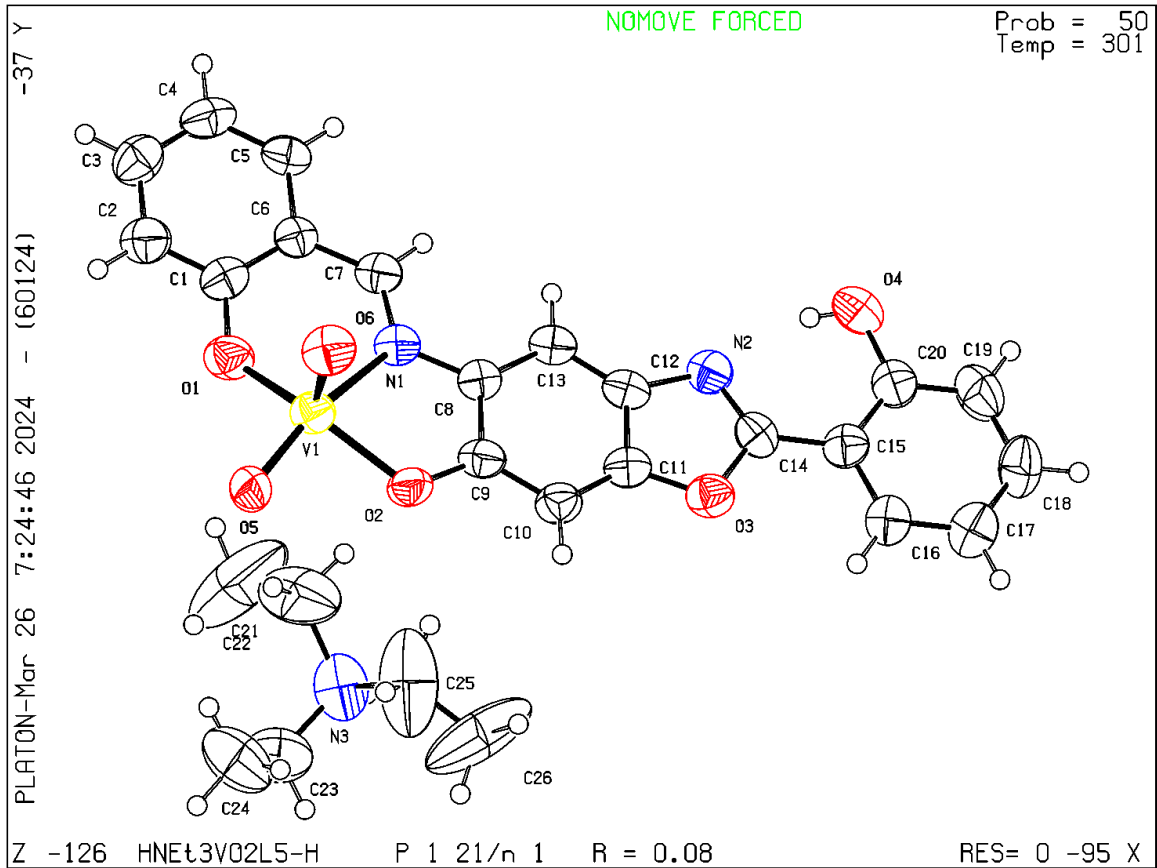

Supplement: s1 [file s1]
