# Supplementary material for: Syntheses, Structures, and Electrochemical Properties of Metallacyclic Oxidovanadium(V) Complexes with Asymmetric Multidentate Linking Ligands
Source: Molecules. 2024 Apr 9;29(8):1700. doi: 10.3390/molecules29081700 (PMC11052122; doi:10.3390/molecules29081700)
Supplement: Supplementary file 1 [file molecules-29-01700-s001.zip]

Archive with 4 entries (4 files):
- Complex1.cif
- Complex2.cif
- Complex4.cif
- SupplementaryMaterials_Rev1.pdf
