# Supplementary material for: Syntheses, Structures, and Electrochemical Properties of Metallacyclic Oxidovanadium(V) Complexes with Asymmetric Multidentate Linking Ligands
Source: Molecules. 2024 Apr 9;29(8):1700. doi: 10.3390/molecules29081700 (PMC11052122; doi:10.3390/molecules29081700)
Supplement: Supplementary file 1 [file molecules-29-01700-s001.zip › Complex1.cif]

data_(VO)3(L5-H)3
_audit_creation_date               2023-08-01
_audit_creation_method
;
Olex2 1.5
(compiled 2023.03.06 svn.rbb2c1857 for OlexSys, GUI svn.r6748)
;
_shelx_SHELXL_version_number       '2016/6'
loop_
  _audit_author_name
  _audit_author_email
  _audit_author_address
 'Koikawa, M.' koikawa@cc.saga-u.ac.jp
;
Saga University
Department of Chemistry
1 Honjo, Saga
Saga
840-8502
Japan
;

_audit_contact_author_address
;
Saga University
Department of Chemistry
1 Honjo, Saga
Saga
840-8502
Japan
;
_audit_contact_author_name                         'Masayuki Koikawa'
_audit_contact_author_email                        'koikawa@cc.saga-u.ac.jp'
_audit_contact_author_phone                        '81-952-28-8549'
_publ_contact_author_id_orcid      ?
_publ_contact_author_name                         'Masayuki Koikawa'
_publ_contact_author_email                        'koikawa@cc.saga-u.ac.jp'
_publ_contact_author_fax                          '81-952-28-8548'
_publ_contact_author_phone                        '81-952-28-8549'
_publ_section_references
;
D. Kratzert, I. Krossing, (2018), J. Appl. Cryst. 51, 928-934. 

Dolomanov, O.V., Bourhis, L.J., Gildea, R.J, Howard, J.A.K. & Puschmann, H.
 (2009), J. Appl. Cryst. 42, 339-341.

Kratzert, D., Holstein, J.J. & Krossing, I. (2015). J. Appl. Cryst. 48, 933-938.

Sheldrick, G.M. (2015). Acta Cryst. A71, 3-8.

Sheldrick, G.M. (2015). Acta Cryst. C71, 3-8.
;
_chemical_name_common              ?
_chemical_name_systematic          ?
_chemical_formula_moiety           'C60 H33 N6 O15 V3, [+ solvents]'
_chemical_formula_sum              'C60 H33 N6 O15 V3'
_chemical_formula_weight           1230.74
_chemical_melting_point            ?
loop_
  _atom_type_symbol
  _atom_type_description
  _atom_type_scat_dispersion_real
  _atom_type_scat_dispersion_imag
  _atom_type_scat_source
 'C' 'C' 0.0033 0.0016 'International Tables Vol C Tables 4.2.6.8 and 6.1.1.4'
 'H' 'H' 0.0000 0.0000 'International Tables Vol C Tables 4.2.6.8 and 6.1.1.4'
 'N' 'N' 0.0061 0.0033 'International Tables Vol C Tables 4.2.6.8 and 6.1.1.4'
 'O' 'O' 0.0106 0.0060 'International Tables Vol C Tables 4.2.6.8 and 6.1.1.4'
 'V' 'V' 0.3005 0.5294 'International Tables Vol C Tables 4.2.6.8 and 6.1.1.4'

_shelx_space_group_comment
;
The symmetry employed for this shelxl refinement is uniquely defined
by the following loop, which should always be used as a source of
symmetry information in preference to the above space-group names.
They are only intended as comments.
;
_space_group_crystal_system        'triclinic'
_space_group_IT_number             2
_space_group_name_H-M_alt          'P -1'
_space_group_name_Hall             '-P 1'
loop_
  _space_group_symop_operation_xyz
 'x, y, z'
 '-x, -y, -z'

_cell_length_a                     12.465(5)
_cell_length_b                     16.244(6)
_cell_length_c                     18.285(8)
_cell_angle_alpha                  102.99(3)
_cell_angle_beta                   98.16(3)
_cell_angle_gamma                  108.59(3)
_cell_volume                       3327(2)
_cell_formula_units_Z              2
_cell_measurement_reflns_used      8270
_cell_measurement_temperature      113
_cell_measurement_theta_max        27.5
_cell_measurement_theta_min        3.1
_shelx_estimated_absorpt_T_max     0.963
_shelx_estimated_absorpt_T_min     0.903
_exptl_absorpt_coefficient_mu      0.476
_exptl_absorpt_correction_T_max    1.000
_exptl_absorpt_correction_T_min    0.868
_exptl_absorpt_correction_type     multi-scan
_exptl_absorpt_process_details     'REQAB'
_exptl_absorpt_special_details     ?
_exptl_crystal_colour              'dull greenish brown'
_exptl_crystal_colour_lustre       dull
_exptl_crystal_colour_modifier     greenish
_exptl_crystal_colour_primary      brown
_exptl_crystal_density_diffrn      1.229
_exptl_crystal_density_meas        ?
_exptl_crystal_density_method      ?
_exptl_crystal_description         Prism
_exptl_crystal_F_000               1248
_exptl_crystal_size_max            0.22
_exptl_crystal_size_mid            0.14
_exptl_crystal_size_min            0.08
_exptl_transmission_factor_max     ?
_exptl_transmission_factor_min     ?
_diffrn_reflns_av_R_equivalents    0.0499
_diffrn_reflns_av_unetI/netI       0.0878
_diffrn_reflns_Laue_measured_fraction_full  0.978
_diffrn_reflns_Laue_measured_fraction_max  0.952
_diffrn_reflns_limit_h_max         16
_diffrn_reflns_limit_h_min         -16
_diffrn_reflns_limit_k_max         15
_diffrn_reflns_limit_k_min         -20
_diffrn_reflns_limit_l_max         23
_diffrn_reflns_limit_l_min         -22
_diffrn_reflns_number              26785
_diffrn_reflns_point_group_measured_fraction_full  0.978
_diffrn_reflns_point_group_measured_fraction_max  0.952
_diffrn_reflns_theta_full          25.242
_diffrn_reflns_theta_max           27.419
_diffrn_reflns_theta_min           3.050
_diffrn_ambient_temperature        113
_diffrn_detector                   CCD
_diffrn_detector_area_resol_mean   28.5714
_diffrn_detector_type              'Rigaku Saturn724+'
_diffrn_measured_fraction_theta_full  0.978
_diffrn_measured_fraction_theta_max  0.952
_diffrn_measurement_device
;
AFC11 (Right): Eulerian 3 circle
;
_diffrn_measurement_device_type    'Rigaku Saturn724+ (4x4 bin mode)'
_diffrn_measurement_method         'profile data from \w-scans'
_diffrn_measurement_specimen_support  'Mitegen 50um'
_diffrn_radiation_collimation      0.3
_diffrn_radiation_monochromator    Confocal
_diffrn_radiation_probe            x-ray
_diffrn_radiation_type             MoK\a
_diffrn_radiation_wavelength       0.71075
_diffrn_source                     'Rotating Anode'
_diffrn_source_current             24.0
_diffrn_source_power               1.2
_diffrn_source_target              Mo
_diffrn_source_type                'Rotating Anode'
_diffrn_source_voltage             50.0
_reflns_Friedel_coverage           0.000
_reflns_Friedel_fraction_full      .
_reflns_Friedel_fraction_max       .
_reflns_number_gt                  8693
_reflns_number_total               14423
_reflns_special_details
;
 Reflections were merged by SHELXL according to the crystal
 class for the calculation of statistics and refinement.
 
 Structure factors included contributions from the .fab file.
 
 _reflns_Friedel_fraction is defined as the number of unique
 Friedel pairs measured divided by the number that would be
 possible theoretically, ignoring centric projections and
 systematic absences.
;
_reflns_threshold_expression       'I > 2\s(I)'
_computing_cell_refinement        
 'CrystalClear-SM Expert 2.0 r16 (Rigaku, 2014)'
_computing_data_collection        
 'CrystalClear-SM Expert 2.0 r16 (Rigaku, 2014)'
_computing_data_reduction         
 'CrystalClear-SM Expert 2.0 r16 (Rigaku, 2014)'
_computing_molecular_graphics      'Olex2 1.5 (Dolomanov et al., 2009)'
_computing_publication_material    'Olex2 1.5 (Dolomanov et al., 2009)'
_computing_structure_refinement    'SHELXL 2016/6 (Sheldrick, 2015)'
_computing_structure_solution      'SHELXT 2014/5 (Sheldrick, 2014)'
_refine_diff_density_max           0.410
_refine_diff_density_min           -0.607
_refine_diff_density_rms           0.067
_refine_ls_extinction_coef         0.0074(10)
_refine_ls_extinction_expression  
 'Fc^*^=kFc[1+0.001xFc^2^\l^3^/sin(2\q)]^-1/4^'
_refine_ls_extinction_method       'SHELXL-2016/6 (Sheldrick 2016)'
_refine_ls_goodness_of_fit_ref     0.949
_refine_ls_hydrogen_treatment      constr
_refine_ls_matrix_type             full
_refine_ls_number_parameters       758
_refine_ls_number_reflns           14423
_refine_ls_number_restraints       0
_refine_ls_R_factor_all            0.0852
_refine_ls_R_factor_gt             0.0568
_refine_ls_restrained_S_all        0.949
_refine_ls_shift/su_max            0.001
_refine_ls_shift/su_mean           0.000
_refine_ls_structure_factor_coef   Fsqd
_refine_ls_weighting_details      
 'w=1/[\s^2^(Fo^2^)+(0.0919P)^2^] where P=(Fo^2^+2Fc^2^)/3'
_refine_ls_weighting_scheme        calc
_refine_ls_wR_factor_gt            0.1509
_refine_ls_wR_factor_ref           0.1766
_refine_special_details            ?
_olex2_refinement_description
;
1. Fixed Uiso
 At 1.2 times of:
  All C(H) groups
2.a Aromatic/amide H refined with riding coordinates:
 C52(H52), C9(H9), C49(H49), C7(H7), C36(H36), C12(H12), C56(H56), C29(H29),
 C47(H47), C32(H32), C5(H5), C58(H58), C16(H16), C27(H27), C59(H59), C19(H19),
 C17(H17), C4(H4), C23(H23), C3(H3), C57(H57), C37(H37), C38(H38), C39(H39),
 C2(H2), C18(H18), C22(H22), C44(H44), C45(H45), C24(H24), C42(H42), C43(H43),
 C25(H25)
;
_atom_sites_solution_hydrogens     geom
_atom_sites_solution_primary       dual
_atom_sites_solution_secondary     ?
loop_
  _atom_site_label
  _atom_site_type_symbol
  _atom_site_fract_x
  _atom_site_fract_y
  _atom_site_fract_z
  _atom_site_U_iso_or_equiv
  _atom_site_adp_type
  _atom_site_occupancy
  _atom_site_site_symmetry_order
  _atom_site_calc_flag
  _atom_site_refinement_flags_posn
  _atom_site_refinement_flags_adp
  _atom_site_refinement_flags_occupancy
  _atom_site_disorder_assembly
  _atom_site_disorder_group
 V1 V 0.74415(5) 0.90235(3) 0.27417(3) 0.03836(15) Uani 1 1 d . . . . .
 V3 V 0.27861(5) 0.67473(3) 0.51720(3) 0.04023(16) Uani 1 1 d . . . . .
 V2 V 0.23462(5) 0.37503(4) 0.07681(3) 0.04131(16) Uani 1 1 d . . . . .
 O3 O 0.62089(18) 0.48170(13) 0.07915(11) 0.0360(5) Uani 1 1 d . . . . .
 O11 O 0.81970(18) 0.82559(13) 0.49337(10) 0.0349(5) Uani 1 1 d . . . . .
 O10 O 0.44520(19) 0.71409(13) 0.55786(11) 0.0395(5) Uani 1 1 d . . . . .
 O7 O 0.36038(19) 0.42417(13) 0.44594(11) 0.0385(5) Uani 1 1 d . . . . .
 O1 O 0.6583(2) 0.95801(13) 0.33229(12) 0.0424(5) Uani 1 1 d . . . . .
 O2 O 0.78145(19) 0.80016(13) 0.22239(11) 0.0391(5) Uani 1 1 d . . . . .
 O4 O 0.2730(2) 0.29045(14) 0.01369(12) 0.0425(5) Uani 1 1 d . . . . .
 O8 O 0.2578(2) 0.61389(14) 0.59063(13) 0.0447(5) Uani 1 1 d . . . . .
 O12 O 0.8985(2) 0.96037(13) 0.32575(12) 0.0416(5) Uani 1 1 d . . . . .
 O6 O 0.3129(2) 0.35512(14) 0.16713(12) 0.0423(5) Uani 1 1 d . . . . .
 O9 O 0.1399(2) 0.61905(14) 0.43864(14) 0.0476(6) Uani 1 1 d . . . . .
 O5 O 0.2046(2) 0.44217(15) 0.01165(12) 0.0461(5) Uani 1 1 d . . . . .
 O13 O 0.7408(2) 0.95438(14) 0.20966(12) 0.0479(6) Uani 1 1 d . . . . .
 O15 O 0.2491(2) 0.76181(14) 0.55514(14) 0.0488(6) Uani 1 1 d . . . . .
 O14 O 0.1033(2) 0.31528(15) 0.07573(13) 0.0524(6) Uani 1 1 d . . . . .
 N6 N 0.7434(2) 0.84194(15) 0.37983(13) 0.0331(5) Uani 1 1 d . . . . .
 N5 N 0.3466(2) 0.73117(16) 0.43350(14) 0.0359(6) Uani 1 1 d . . . . .
 N1 N 0.5776(2) 0.80154(16) 0.21938(13) 0.0368(6) Uani 1 1 d . . . . .
 N2 N 0.4355(2) 0.46655(16) 0.08456(13) 0.0363(6) Uani 1 1 d . . . . .
 N3 N 0.2353(2) 0.48320(16) 0.16617(14) 0.0401(6) Uani 1 1 d . . . . .
 N4 N 0.3044(2) 0.54451(16) 0.45438(14) 0.0392(6) Uani 1 1 d . . . . .
 C54 C 0.8370(3) 0.85388(19) 0.42815(16) 0.0344(6) Uani 1 1 d . . . . .
 C52 C 0.6384(3) 0.76873(18) 0.53803(16) 0.0345(6) Uani 1 1 d . . . . .
 H52 H 0.675081 0.765300 0.585905 0.041 Uiso 1 1 calc R U . . .
 C11 C 0.6221(3) 0.56709(19) 0.11417(16) 0.0359(7) Uani 1 1 d . . . . .
 C53 C 0.5189(3) 0.74512(18) 0.51543(16) 0.0326(6) Uani 1 1 d . . . . .
 C8 C 0.5806(3) 0.71508(19) 0.18356(15) 0.0345(6) Uani 1 1 d . . . . .
 C51 C 0.7007(3) 0.79789(19) 0.48513(16) 0.0340(6) Uani 1 1 d . . . . .
 C48 C 0.4676(3) 0.75474(19) 0.44410(17) 0.0352(6) Uani 1 1 d . . . . .
 C50 C 0.6518(3) 0.80688(18) 0.41539(16) 0.0350(6) Uani 1 1 d . . . . .
 C31 C 0.3339(3) 0.4314(2) 0.37149(17) 0.0378(7) Uani 1 1 d . . . . .
 C55 C 0.9577(3) 0.89600(19) 0.42448(17) 0.0359(7) Uani 1 1 d . . . . .
 C13 C 0.6966(3) 0.72078(19) 0.18425(16) 0.0370(7) Uani 1 1 d . . . . .
 C9 C 0.4840(3) 0.63495(19) 0.15127(16) 0.0369(7) Uani 1 1 d . . . . .
 H9 H 0.407186 0.632618 0.152561 0.044 Uiso 1 1 calc R U . . .
 C14 C 0.5052(3) 0.4249(2) 0.06391(16) 0.0364(7) Uani 1 1 d . . . . .
 C35 C 0.3485(3) 0.5004(2) 0.57277(17) 0.0400(7) Uani 1 1 d . . . . .
 C40 C 0.3075(3) 0.5611(2) 0.61843(19) 0.0431(8) Uani 1 1 d . . . . .
 C49 C 0.5331(3) 0.78445(18) 0.39264(16) 0.0353(6) Uani 1 1 d . . . . .
 H49 H 0.497991 0.788936 0.344794 0.042 Uiso 1 1 calc R U . . .
 C30 C 0.2988(3) 0.50541(19) 0.37634(18) 0.0363(7) Uani 1 1 d . . . . .
 C6 C 0.4699(3) 0.90193(19) 0.24490(16) 0.0377(7) Uani 1 1 d . . . . .
 C7 C 0.4816(3) 0.8188(2) 0.20712(16) 0.0377(7) Uani 1 1 d . . . . .
 H7 H 0.415577 0.773183 0.170809 0.045 Uiso 1 1 calc R U . . .
 C36 C 0.3940(3) 0.4452(2) 0.60581(18) 0.0426(7) Uani 1 1 d . . . . .
 H36 H 0.420207 0.403663 0.574904 0.051 Uiso 1 1 calc R U . . .
 C15 C 0.4806(3) 0.3293(2) 0.02807(16) 0.0387(7) Uani 1 1 d . . . . .
 C10 C 0.5070(3) 0.55810(19) 0.11683(15) 0.0360(6) Uani 1 1 d . . . . .
 C12 C 0.7182(3) 0.6451(2) 0.14546(16) 0.0382(7) Uani 1 1 d . . . . .
 H12 H 0.794174 0.647592 0.141109 0.046 Uiso 1 1 calc R U . . .
 C28 C 0.2681(3) 0.47366(19) 0.24046(17) 0.0366(7) Uani 1 1 d . . . . .
 C56 C 1.0499(3) 0.8910(2) 0.47530(18) 0.0418(7) Uani 1 1 d . . . . .
 H56 H 1.033013 0.857594 0.511383 0.050 Uiso 1 1 calc R U . . .
 C60 C 0.9824(3) 0.94782(19) 0.37222(17) 0.0370(7) Uani 1 1 d . . . . .
 C29 C 0.2637(3) 0.5272(2) 0.31011(17) 0.0392(7) Uani 1 1 d . . . . .
 H29 H 0.237867 0.576556 0.312241 0.047 Uiso 1 1 calc R U . . .
 C1 C 0.5588(3) 0.9682(2) 0.30703(17) 0.0402(7) Uani 1 1 d . . . . .
 C33 C 0.3092(3) 0.3996(2) 0.23711(17) 0.0382(7) Uani 1 1 d . . . . .
 C47 C 0.2857(3) 0.7535(2) 0.38167(18) 0.0424(7) Uani 1 1 d . . . . .
 H47 H 0.327436 0.791875 0.354836 0.051 Uiso 1 1 calc R U . . .
 C34 C 0.3385(3) 0.49399(18) 0.49202(17) 0.0360(7) Uani 1 1 d . . . . .
 C20 C 0.3643(3) 0.2665(2) 0.00354(16) 0.0416(7) Uani 1 1 d . . . . .
 C32 C 0.3425(3) 0.3767(2) 0.30411(17) 0.0410(7) Uani 1 1 d . . . . .
 H32 H 0.368790 0.327729 0.303386 0.049 Uiso 1 1 calc R U . . .
 C5 C 0.3640(3) 0.9141(2) 0.22278(18) 0.0432(7) Uani 1 1 d . . . . .
 H5 H 0.304372 0.868813 0.181677 0.052 Uiso 1 1 calc R U . . .
 C21 C 0.1685(3) 0.5117(2) 0.0148(2) 0.0471(8) Uani 1 1 d . . . . .
 C58 C 1.1871(3) 0.9820(2) 0.4200(2) 0.0483(9) Uani 1 1 d . . . . .
 H58 H 1.265379 1.010100 0.417327 0.058 Uiso 1 1 calc R U . . .
 C16 C 0.5718(3) 0.2986(2) 0.01708(17) 0.0449(8) Uani 1 1 d . . . . .
 H16 H 0.649827 0.340365 0.034089 0.054 Uiso 1 1 calc R U . . .
 C27 C 0.1990(3) 0.5484(2) 0.1573(2) 0.0461(8) Uani 1 1 d . . . . .
 H27 H 0.193579 0.587532 0.202684 0.055 Uiso 1 1 calc R U . . .
 C59 C 1.0990(3) 0.9900(2) 0.3703(2) 0.0491(9) Uani 1 1 d . . . . .
 H59 H 1.117346 1.024002 0.334778 0.059 Uiso 1 1 calc R U . . .
 C19 C 0.3451(3) 0.1748(2) -0.03313(18) 0.0464(8) Uani 1 1 d . . . . .
 H19 H 0.267793 0.131702 -0.050875 0.056 Uiso 1 1 calc R U . . .
 C46 C 0.1619(3) 0.7247(2) 0.36267(19) 0.0440(8) Uani 1 1 d . . . . .
 C41 C 0.0927(3) 0.6580(2) 0.3921(2) 0.0516(9) Uani 1 1 d . . . . .
 C17 C 0.5496(3) 0.2076(2) -0.01839(19) 0.0490(9) Uani 1 1 d . . . . .
 H17 H 0.611915 0.187275 -0.025362 0.059 Uiso 1 1 calc R U . . .
 C4 C 0.3455(3) 0.9905(2) 0.25974(19) 0.0484(8) Uani 1 1 d . . . . .
 H4 H 0.274082 0.998315 0.244542 0.058 Uiso 1 1 calc R U . . .
 C23 C 0.1037(3) 0.6081(2) -0.0499(2) 0.0592(10) Uani 1 1 d . . . . .
 H23 H 0.080687 0.621219 -0.096418 0.071 Uiso 1 1 calc R U . . .
 C26 C 0.1668(3) 0.5664(2) 0.0861(2) 0.0470(8) Uani 1 1 d . . . . .
 C3 C 0.4345(3) 1.0565(2) 0.3203(2) 0.0526(9) Uani 1 1 d . . . . .
 H3 H 0.422773 1.109832 0.345248 0.063 Uiso 1 1 calc R U . . .
 C57 C 1.1647(3) 0.9339(2) 0.4738(2) 0.0473(8) Uani 1 1 d . . . . .
 H57 H 1.226546 0.930607 0.508555 0.057 Uiso 1 1 calc R U . . .
 C37 C 0.4011(3) 0.4506(2) 0.6833(2) 0.0531(9) Uani 1 1 d . . . . .
 H37 H 0.431874 0.412882 0.705472 0.064 Uiso 1 1 calc R U . . .
 C38 C 0.3629(4) 0.5116(2) 0.7282(2) 0.0575(10) Uani 1 1 d . . . . .
 H38 H 0.370017 0.516673 0.781561 0.069 Uiso 1 1 calc R U . . .
 C39 C 0.3146(3) 0.5653(2) 0.6966(2) 0.0524(9) Uani 1 1 d . . . . .
 H39 H 0.286267 0.604993 0.727827 0.063 Uiso 1 1 calc R U . . .
 C2 C 0.5392(3) 1.0468(2) 0.34511(19) 0.0477(8) Uani 1 1 d . . . . .
 H2 H 0.597021 1.092193 0.387095 0.057 Uiso 1 1 calc R U . . .
 C18 C 0.4360(4) 0.1475(2) -0.04331(19) 0.0537(9) Uani 1 1 d . . . . .
 H18 H 0.420793 0.085559 -0.068147 0.064 Uiso 1 1 calc R U . . .
 C22 C 0.1338(3) 0.5321(3) -0.0532(2) 0.0541(9) Uani 1 1 d . . . . .
 H22 H 0.130855 0.493899 -0.101686 0.065 Uiso 1 1 calc R U . . .
 C44 C -0.0105(3) 0.7322(2) 0.2876(2) 0.0578(10) Uani 1 1 d . . . . .
 H44 H -0.045317 0.757082 0.252864 0.069 Uiso 1 1 calc R U . . .
 C45 C 0.1081(3) 0.7592(2) 0.3102(2) 0.0498(8) Uani 1 1 d . . . . .
 H45 H 0.155595 0.802671 0.289715 0.060 Uiso 1 1 calc R U . . .
 C24 C 0.1069(3) 0.6652(3) 0.0205(2) 0.0639(11) Uani 1 1 d . . . . .
 H24 H 0.088236 0.717876 0.022172 0.077 Uiso 1 1 calc R U . . .
 C42 C -0.0294(3) 0.6286(3) 0.3673(2) 0.0602(10) Uani 1 1 d . . . . .
 H42 H -0.078653 0.582700 0.384641 0.072 Uiso 1 1 calc R U . . .
 C43 C -0.0772(4) 0.6682(3) 0.3167(2) 0.0670(11) Uani 1 1 d . . . . .
 H43 H -0.159441 0.649742 0.301968 0.080 Uiso 1 1 calc R U . . .
 C25 C 0.1372(3) 0.6444(2) 0.0873(2) 0.0597(10) Uani 1 1 d . . . . .
 H25 H 0.138444 0.682842 0.135305 0.072 Uiso 1 1 calc R U . . .

loop_
  _atom_site_aniso_label
  _atom_site_aniso_U_11
  _atom_site_aniso_U_22
  _atom_site_aniso_U_33
  _atom_site_aniso_U_23
  _atom_site_aniso_U_13
  _atom_site_aniso_U_12
 V1 0.0489(4) 0.0332(3) 0.0296(3) 0.0038(2) 0.0050(2) 0.0158(2)
 V3 0.0385(3) 0.0377(3) 0.0444(3) 0.0060(2) 0.0130(3) 0.0164(2)
 V2 0.0467(3) 0.0396(3) 0.0359(3) 0.0038(2) -0.0008(2) 0.0227(2)
 O3 0.0434(13) 0.0343(10) 0.0310(10) 0.0024(8) 0.0019(9) 0.0226(9)
 O11 0.0353(12) 0.0411(10) 0.0264(10) 0.0046(8) 0.0030(9) 0.0167(9)
 O10 0.0465(13) 0.0420(11) 0.0327(11) 0.0094(9) 0.0131(10) 0.0189(10)
 O7 0.0434(13) 0.0414(11) 0.0359(11) 0.0090(9) 0.0108(10) 0.0231(10)
 O1 0.0566(15) 0.0344(10) 0.0329(11) 0.0016(9) 0.0034(10) 0.0207(10)
 O2 0.0442(13) 0.0394(10) 0.0308(10) 0.0038(9) 0.0039(9) 0.0178(9)
 O4 0.0471(14) 0.0408(11) 0.0348(11) 0.0015(9) -0.0039(10) 0.0219(10)
 O8 0.0476(14) 0.0425(11) 0.0470(13) 0.0117(10) 0.0181(11) 0.0179(10)
 O12 0.0489(14) 0.0353(10) 0.0364(11) 0.0066(9) 0.0109(10) 0.0119(10)
 O6 0.0506(14) 0.0413(11) 0.0347(11) 0.0017(9) 0.0037(10) 0.0254(10)
 O9 0.0381(13) 0.0429(12) 0.0611(15) 0.0117(11) 0.0104(11) 0.0166(10)
 O5 0.0512(15) 0.0496(12) 0.0420(12) 0.0089(10) 0.0024(11) 0.0307(11)
 O13 0.0666(17) 0.0417(11) 0.0367(11) 0.0092(10) 0.0089(11) 0.0242(11)
 O15 0.0434(14) 0.0425(12) 0.0607(15) 0.0056(11) 0.0209(12) 0.0187(10)
 O14 0.0503(15) 0.0503(13) 0.0535(14) 0.0101(11) 0.0016(12) 0.0219(11)
 N6 0.0342(14) 0.0335(11) 0.0281(12) 0.0033(10) 0.0051(10) 0.0124(10)
 N5 0.0321(14) 0.0342(12) 0.0404(13) 0.0039(11) 0.0070(11) 0.0161(10)
 N1 0.0516(17) 0.0351(12) 0.0270(12) 0.0065(10) 0.0053(11) 0.0235(12)
 N2 0.0479(16) 0.0347(12) 0.0284(12) 0.0036(10) 0.0022(11) 0.0244(11)
 N3 0.0425(16) 0.0397(13) 0.0376(14) 0.0052(11) 0.0036(12) 0.0207(12)
 N4 0.0434(16) 0.0365(12) 0.0370(13) 0.0055(11) 0.0104(12) 0.0165(11)
 C54 0.0381(17) 0.0334(13) 0.0264(14) 0.0010(11) 0.0029(12) 0.0129(12)
 C52 0.0402(17) 0.0371(14) 0.0271(13) 0.0057(12) 0.0048(13) 0.0188(13)
 C11 0.0473(18) 0.0332(13) 0.0259(13) 0.0028(11) -0.0012(13) 0.0210(13)
 C53 0.0332(16) 0.0312(13) 0.0309(14) 0.0039(12) 0.0060(13) 0.0125(12)
 C8 0.0462(18) 0.0342(14) 0.0256(13) 0.0042(11) 0.0008(13) 0.0243(13)
 C51 0.0345(16) 0.0349(14) 0.0295(14) 0.0027(12) 0.0039(12) 0.0146(12)
 C48 0.0316(16) 0.0348(14) 0.0349(15) 0.0023(12) 0.0017(13) 0.0145(12)
 C50 0.0439(18) 0.0314(13) 0.0274(14) 0.0036(11) 0.0062(13) 0.0150(12)
 C31 0.0386(18) 0.0384(15) 0.0384(16) 0.0099(13) 0.0077(14) 0.0181(13)
 C55 0.0347(17) 0.0344(14) 0.0335(15) 0.0000(12) 0.0074(13) 0.0126(12)
 C13 0.0475(19) 0.0368(14) 0.0268(14) 0.0070(12) 0.0008(13) 0.0200(13)
 C9 0.0409(18) 0.0362(14) 0.0305(14) 0.0014(12) -0.0020(13) 0.0201(13)
 C14 0.0435(18) 0.0414(15) 0.0249(13) 0.0053(12) -0.0001(13) 0.0227(14)
 C35 0.0398(18) 0.0353(14) 0.0376(16) 0.0034(13) 0.0070(14) 0.0099(13)
 C40 0.0384(18) 0.0398(16) 0.0453(18) 0.0093(14) 0.0132(15) 0.0071(13)
 C49 0.0346(16) 0.0355(14) 0.0316(14) 0.0088(12) -0.0010(13) 0.0116(12)
 C30 0.0323(16) 0.0342(14) 0.0417(16) 0.0068(13) 0.0081(13) 0.0141(12)
 C6 0.051(2) 0.0336(14) 0.0308(14) 0.0073(12) 0.0070(14) 0.0218(13)
 C7 0.051(2) 0.0369(14) 0.0262(14) 0.0054(12) 0.0043(13) 0.0226(14)
 C36 0.0443(19) 0.0389(15) 0.0399(17) 0.0060(14) 0.0073(15) 0.0139(14)
 C15 0.053(2) 0.0397(15) 0.0287(14) 0.0088(12) 0.0055(14) 0.0267(14)
 C10 0.0412(17) 0.0386(15) 0.0249(13) 0.0005(12) -0.0033(12) 0.0209(13)
 C12 0.0436(18) 0.0419(15) 0.0288(14) 0.0045(12) -0.0007(13) 0.0230(14)
 C28 0.0357(17) 0.0359(14) 0.0395(16) 0.0080(13) 0.0057(14) 0.0180(12)
 C56 0.0377(18) 0.0452(16) 0.0397(16) 0.0021(14) 0.0086(14) 0.0186(14)
 C60 0.0378(17) 0.0322(14) 0.0345(15) -0.0021(12) 0.0071(14) 0.0129(12)
 C29 0.0380(18) 0.0376(15) 0.0414(16) 0.0076(13) 0.0078(14) 0.0162(13)
 C1 0.060(2) 0.0355(14) 0.0312(15) 0.0101(12) 0.0151(15) 0.0231(14)
 C33 0.0422(18) 0.0373(14) 0.0358(15) 0.0045(13) 0.0042(14) 0.0219(13)
 C47 0.0442(19) 0.0397(15) 0.0425(17) 0.0043(14) 0.0023(15) 0.0227(14)
 C34 0.0345(17) 0.0315(13) 0.0384(16) 0.0033(12) 0.0076(13) 0.0120(12)
 C20 0.059(2) 0.0386(15) 0.0275(14) 0.0062(12) 0.0013(14) 0.0241(15)
 C32 0.052(2) 0.0381(15) 0.0397(16) 0.0088(13) 0.0099(15) 0.0267(14)
 C5 0.057(2) 0.0423(16) 0.0378(16) 0.0118(14) 0.0104(16) 0.0284(15)
 C21 0.043(2) 0.0465(17) 0.055(2) 0.0148(16) 0.0029(16) 0.0243(15)
 C58 0.047(2) 0.0375(16) 0.053(2) -0.0016(15) 0.0190(17) 0.0116(14)
 C16 0.063(2) 0.0403(16) 0.0363(16) 0.0069(14) 0.0027(16) 0.0312(16)
 C27 0.046(2) 0.0418(16) 0.0472(18) 0.0035(15) -0.0032(15) 0.0232(15)
 C59 0.063(2) 0.0317(15) 0.0458(19) 0.0024(14) 0.0218(18) 0.0102(15)
 C19 0.063(2) 0.0357(15) 0.0356(16) 0.0031(13) 0.0035(16) 0.0201(15)
 C46 0.0380(18) 0.0351(15) 0.0495(18) -0.0052(14) -0.0021(15) 0.0182(13)
 C41 0.045(2) 0.0479(18) 0.058(2) -0.0030(17) 0.0027(17) 0.0286(16)
 C17 0.072(3) 0.0471(18) 0.0423(18) 0.0105(15) 0.0127(18) 0.0415(18)
 C4 0.064(2) 0.0426(17) 0.0489(19) 0.0124(15) 0.0202(18) 0.0309(16)
 C23 0.049(2) 0.058(2) 0.072(3) 0.023(2) -0.0006(19) 0.0238(18)
 C26 0.0399(19) 0.0493(18) 0.0515(19) 0.0131(16) -0.0003(16) 0.0216(15)
 C3 0.061(2) 0.0433(17) 0.056(2) 0.0052(16) 0.0223(19) 0.0256(17)
 C57 0.0372(19) 0.0436(17) 0.0494(19) -0.0053(15) 0.0041(16) 0.0148(14)
 C37 0.059(2) 0.0513(19) 0.0458(19) 0.0128(16) 0.0051(17) 0.0204(17)
 C38 0.070(3) 0.055(2) 0.0407(18) 0.0121(17) 0.0153(19) 0.0141(19)
 C39 0.063(2) 0.0460(18) 0.0460(19) 0.0095(16) 0.0196(18) 0.0163(17)
 C2 0.060(2) 0.0373(16) 0.0447(18) 0.0015(14) 0.0178(17) 0.0213(15)
 C18 0.084(3) 0.0398(17) 0.0413(18) 0.0031(15) 0.0096(19) 0.0353(19)
 C22 0.046(2) 0.061(2) 0.057(2) 0.0176(18) -0.0035(17) 0.0272(17)
 C44 0.049(2) 0.053(2) 0.062(2) -0.0045(18) -0.0073(19) 0.0293(18)
 C45 0.048(2) 0.0451(17) 0.0523(19) -0.0019(15) -0.0015(17) 0.0278(15)
 C24 0.056(2) 0.053(2) 0.077(3) 0.015(2) -0.013(2) 0.0275(18)
 C42 0.038(2) 0.057(2) 0.074(3) 0.002(2) 0.0040(19) 0.0172(17)
 C43 0.049(2) 0.077(3) 0.068(3) -0.001(2) -0.005(2) 0.036(2)
 C25 0.052(2) 0.0462(18) 0.073(3) 0.0059(18) -0.008(2) 0.0252(17)

_geom_special_details
;
 All esds (except the esd in the dihedral angle between two l.s. planes)
 are estimated using the full covariance matrix.  The cell esds are taken
 into account individually in the estimation of esds in distances, angles
 and torsion angles; correlations between esds in cell parameters are only
 used when they are defined by crystal symmetry.  An approximate (isotropic)
 treatment of cell esds is used for estimating esds involving l.s. planes.
;
loop_
  _geom_bond_atom_site_label_1
  _geom_bond_atom_site_label_2
  _geom_bond_distance
  _geom_bond_site_symmetry_2
  _geom_bond_publ_flag
 V1 O1 1.897(2) . ?
 V1 O2 1.944(2) . ?
 V1 O12 1.847(3) . ?
 V1 O13 1.601(2) . ?
 V1 N6 2.355(3) . ?
 V1 N1 2.121(3) . ?
 V3 O10 1.943(2) . ?
 V3 O8 1.838(2) . ?
 V3 O9 1.893(3) . ?
 V3 O15 1.606(2) . ?
 V3 N5 2.099(3) . ?
 V3 N4 2.312(3) . ?
 V2 O4 1.820(2) . ?
 V2 O6 1.941(2) . ?
 V2 O5 1.862(2) . ?
 V2 O14 1.609(3) . ?
 V2 N2 2.436(3) . ?
 V2 N3 2.110(3) . ?
 O3 C11 1.385(3) . ?
 O3 C14 1.390(4) . ?
 O11 C54 1.391(3) . ?
 O11 C51 1.380(4) . ?
 O10 C53 1.336(3) . ?
 O7 C31 1.395(4) . ?
 O7 C34 1.380(3) . ?
 O1 C1 1.335(4) . ?
 O2 C13 1.336(4) . ?
 O4 C20 1.338(4) . ?
 O8 C40 1.350(4) . ?
 O12 C60 1.349(4) . ?
 O6 C33 1.336(3) . ?
 O9 C41 1.344(4) . ?
 O5 C21 1.336(4) . ?
 N6 C54 1.290(4) . ?
 N6 C50 1.420(4) . ?
 N5 C48 1.406(4) . ?
 N5 C47 1.316(4) . ?
 N1 C8 1.424(3) . ?
 N1 C7 1.314(4) . ?
 N2 C14 1.307(4) . ?
 N2 C10 1.402(4) . ?
 N3 C28 1.419(4) . ?
 N3 C27 1.309(4) . ?
 N4 C30 1.407(4) . ?
 N4 C34 1.312(4) . ?
 C54 C55 1.459(4) . ?
 C52 H52 0.9500 . ?
 C52 C53 1.388(4) . ?
 C52 C51 1.395(4) . ?
 C11 C10 1.404(4) . ?
 C11 C12 1.371(4) . ?
 C53 C48 1.433(4) . ?
 C8 C13 1.418(4) . ?
 C8 C9 1.395(4) . ?
 C51 C50 1.393(4) . ?
 C48 C49 1.399(4) . ?
 C50 C49 1.381(4) . ?
 C31 C30 1.393(4) . ?
 C31 C32 1.388(4) . ?
 C55 C56 1.407(5) . ?
 C55 C60 1.413(4) . ?
 C13 C12 1.400(4) . ?
 C9 H9 0.9500 . ?
 C9 C10 1.401(4) . ?
 C14 C15 1.454(4) . ?
 C35 C40 1.416(4) . ?
 C35 C36 1.400(5) . ?
 C35 C34 1.441(4) . ?
 C40 C39 1.404(5) . ?
 C49 H49 0.9500 . ?
 C30 C29 1.387(4) . ?
 C6 C7 1.434(4) . ?
 C6 C1 1.417(4) . ?
 C6 C5 1.414(5) . ?
 C7 H7 0.9500 . ?
 C36 H36 0.9500 . ?
 C36 C37 1.389(4) . ?
 C15 C20 1.417(5) . ?
 C15 C16 1.401(5) . ?
 C12 H12 0.9500 . ?
 C28 C29 1.390(4) . ?
 C28 C33 1.442(4) . ?
 C56 H56 0.9500 . ?
 C56 C57 1.385(4) . ?
 C60 C59 1.405(4) . ?
 C29 H29 0.9500 . ?
 C1 C2 1.423(4) . ?
 C33 C32 1.404(4) . ?
 C47 H47 0.9500 . ?
 C47 C46 1.427(5) . ?
 C20 C19 1.416(4) . ?
 C32 H32 0.9500 . ?
 C5 H5 0.9500 . ?
 C5 C4 1.378(4) . ?
 C21 C26 1.410(5) . ?
 C21 C22 1.402(5) . ?
 C58 H58 0.9500 . ?
 C58 C59 1.381(5) . ?
 C58 C57 1.393(5) . ?
 C16 H16 0.9500 . ?
 C16 C17 1.391(4) . ?
 C27 H27 0.9500 . ?
 C27 C26 1.428(5) . ?
 C59 H59 0.9500 . ?
 C19 H19 0.9500 . ?
 C19 C18 1.364(5) . ?
 C46 C41 1.417(5) . ?
 C46 C45 1.409(5) . ?
 C41 C42 1.412(5) . ?
 C17 H17 0.9500 . ?
 C17 C18 1.379(5) . ?
 C4 H4 0.9500 . ?
 C4 C3 1.401(5) . ?
 C23 H23 0.9500 . ?
 C23 C22 1.390(5) . ?
 C23 C24 1.395(5) . ?
 C26 C25 1.426(5) . ?
 C3 H3 0.9500 . ?
 C3 C2 1.389(5) . ?
 C57 H57 0.9500 . ?
 C37 H37 0.9500 . ?
 C37 C38 1.389(5) . ?
 C38 H38 0.9500 . ?
 C38 C39 1.385(5) . ?
 C39 H39 0.9500 . ?
 C2 H2 0.9500 . ?
 C18 H18 0.9500 . ?
 C22 H22 0.9500 . ?
 C44 H44 0.9500 . ?
 C44 C45 1.372(5) . ?
 C44 C43 1.370(6) . ?
 C45 H45 0.9500 . ?
 C24 H24 0.9500 . ?
 C24 C25 1.374(5) . ?
 C42 H42 0.9500 . ?
 C42 C43 1.409(6) . ?
 C43 H43 0.9500 . ?
 C25 H25 0.9500 . ?

loop_
  _geom_angle_atom_site_label_1
  _geom_angle_atom_site_label_2
  _geom_angle_atom_site_label_3
  _geom_angle
  _geom_angle_site_symmetry_1
  _geom_angle_site_symmetry_3
  _geom_angle_publ_flag
 O1 V1 O2 154.53(9) . . ?
 O1 V1 N6 77.32(9) . . ?
 O1 V1 N1 83.27(10) . . ?
 O2 V1 N6 85.99(9) . . ?
 O2 V1 N1 77.24(10) . . ?
 O12 V1 O1 106.60(10) . . ?
 O12 V1 O2 88.97(10) . . ?
 O12 V1 N6 79.98(9) . . ?
 O12 V1 N1 162.90(10) . . ?
 O13 V1 O1 95.29(11) . . ?
 O13 V1 O2 101.89(10) . . ?
 O13 V1 O12 99.81(12) . . ?
 O13 V1 N6 172.12(10) . . ?
 O13 V1 N1 92.97(11) . . ?
 N1 V1 N6 88.91(9) . . ?
 O10 V3 N5 77.88(10) . . ?
 O10 V3 N4 82.06(10) . . ?
 O8 V3 O10 87.77(10) . . ?
 O8 V3 O9 106.28(11) . . ?
 O8 V3 N5 162.18(11) . . ?
 O8 V3 N4 80.91(10) . . ?
 O9 V3 O10 154.56(9) . . ?
 O9 V3 N5 83.70(10) . . ?
 O9 V3 N4 79.46(10) . . ?
 O15 V3 O10 103.09(11) . . ?
 O15 V3 O8 100.68(11) . . ?
 O15 V3 O9 95.16(12) . . ?
 O15 V3 N5 92.91(11) . . ?
 O15 V3 N4 174.62(12) . . ?
 N5 V3 N4 86.63(9) . . ?
 O4 V2 O6 90.71(10) . . ?
 O4 V2 O5 101.89(10) . . ?
 O4 V2 N2 81.01(10) . . ?
 O4 V2 N3 164.98(11) . . ?
 O6 V2 N2 79.71(10) . . ?
 O6 V2 N3 78.29(10) . . ?
 O5 V2 O6 156.00(10) . . ?
 O5 V2 N2 82.17(10) . . ?
 O5 V2 N3 85.17(10) . . ?
 O14 V2 O4 100.24(12) . . ?
 O14 V2 O6 98.05(12) . . ?
 O14 V2 O5 99.66(12) . . ?
 O14 V2 N2 177.48(10) . . ?
 O14 V2 N3 91.50(12) . . ?
 N3 V2 N2 86.92(10) . . ?
 C11 O3 C14 104.6(2) . . ?
 C51 O11 C54 103.6(2) . . ?
 C53 O10 V3 119.86(19) . . ?
 C34 O7 C31 104.5(2) . . ?
 C1 O1 V1 128.32(19) . . ?
 C13 O2 V1 120.3(2) . . ?
 C20 O4 V2 141.0(2) . . ?
 C40 O8 V3 135.4(2) . . ?
 C60 O12 V1 140.58(19) . . ?
 C33 O6 V2 119.15(19) . . ?
 C41 O9 V3 127.5(2) . . ?
 C21 O5 V2 137.6(2) . . ?
 C54 N6 V1 123.19(19) . . ?
 C54 N6 C50 104.7(2) . . ?
 C50 N6 V1 130.5(2) . . ?
 C48 N5 V3 113.7(2) . . ?
 C47 N5 V3 123.7(2) . . ?
 C47 N5 C48 122.1(3) . . ?
 C8 N1 V1 113.9(2) . . ?
 C7 N1 V1 123.9(2) . . ?
 C7 N1 C8 121.2(3) . . ?
 C14 N2 V2 118.3(2) . . ?
 C14 N2 C10 105.3(3) . . ?
 C10 N2 V2 135.7(2) . . ?
 C28 N3 V2 112.50(19) . . ?
 C27 N3 V2 126.0(2) . . ?
 C27 N3 C28 121.2(3) . . ?
 C30 N4 V3 132.3(2) . . ?
 C34 N4 V3 122.0(2) . . ?
 C34 N4 C30 105.6(2) . . ?
 O11 C54 C55 116.3(3) . . ?
 N6 C54 O11 115.3(3) . . ?
 N6 C54 C55 128.4(3) . . ?
 C53 C52 H52 122.5 . . ?
 C53 C52 C51 114.9(3) . . ?
 C51 C52 H52 122.5 . . ?
 O3 C11 C10 107.3(3) . . ?
 C12 C11 O3 126.7(3) . . ?
 C12 C11 C10 125.9(3) . . ?
 O10 C53 C52 123.4(3) . . ?
 O10 C53 C48 115.9(3) . . ?
 C52 C53 C48 120.7(3) . . ?
 C13 C8 N1 110.7(3) . . ?
 C9 C8 N1 125.7(3) . . ?
 C9 C8 C13 123.6(3) . . ?
 O11 C51 C52 126.7(3) . . ?
 O11 C51 C50 108.4(2) . . ?
 C50 C51 C52 124.8(3) . . ?
 N5 C48 C53 111.9(3) . . ?
 C49 C48 N5 125.5(3) . . ?
 C49 C48 C53 122.6(3) . . ?
 C51 C50 N6 107.9(3) . . ?
 C49 C50 N6 131.3(3) . . ?
 C49 C50 C51 120.8(3) . . ?
 C30 C31 O7 107.8(3) . . ?
 C32 C31 O7 126.9(3) . . ?
 C32 C31 C30 125.3(3) . . ?
 C56 C55 C54 121.3(3) . . ?
 C56 C55 C60 119.5(3) . . ?
 C60 C55 C54 119.0(3) . . ?
 O2 C13 C8 117.3(3) . . ?
 O2 C13 C12 122.8(3) . . ?
 C12 C13 C8 119.9(3) . . ?
 C8 C9 H9 122.0 . . ?
 C8 C9 C10 116.0(3) . . ?
 C10 C9 H9 122.0 . . ?
 O3 C14 C15 115.6(3) . . ?
 N2 C14 O3 114.1(2) . . ?
 N2 C14 C15 130.3(3) . . ?
 C40 C35 C34 119.2(3) . . ?
 C36 C35 C40 119.7(3) . . ?
 C36 C35 C34 121.1(3) . . ?
 O8 C40 C35 123.7(3) . . ?
 O8 C40 C39 117.3(3) . . ?
 C39 C40 C35 119.0(3) . . ?
 C48 C49 H49 121.9 . . ?
 C50 C49 C48 116.1(3) . . ?
 C50 C49 H49 121.9 . . ?
 C31 C30 N4 108.1(3) . . ?
 C29 C30 N4 131.5(3) . . ?
 C29 C30 C31 120.3(3) . . ?
 C1 C6 C7 121.2(3) . . ?
 C5 C6 C7 118.6(3) . . ?
 C5 C6 C1 120.0(3) . . ?
 N1 C7 C6 124.4(3) . . ?
 N1 C7 H7 117.8 . . ?
 C6 C7 H7 117.8 . . ?
 C35 C36 H36 119.7 . . ?
 C37 C36 C35 120.6(3) . . ?
 C37 C36 H36 119.7 . . ?
 C20 C15 C14 120.4(3) . . ?
 C16 C15 C14 120.2(3) . . ?
 C16 C15 C20 119.4(3) . . ?
 N2 C10 C11 108.6(3) . . ?
 N2 C10 C9 132.3(3) . . ?
 C9 C10 C11 119.0(3) . . ?
 C11 C12 C13 115.3(3) . . ?
 C11 C12 H12 122.3 . . ?
 C13 C12 H12 122.3 . . ?
 N3 C28 C33 111.9(3) . . ?
 C29 C28 N3 126.4(3) . . ?
 C29 C28 C33 121.6(3) . . ?
 C55 C56 H56 119.3 . . ?
 C57 C56 C55 121.4(3) . . ?
 C57 C56 H56 119.3 . . ?
 O12 C60 C55 122.4(3) . . ?
 O12 C60 C59 118.9(3) . . ?
 C59 C60 C55 118.7(3) . . ?
 C30 C29 C28 117.1(3) . . ?
 C30 C29 H29 121.5 . . ?
 C28 C29 H29 121.5 . . ?
 O1 C1 C6 122.4(3) . . ?
 O1 C1 C2 119.1(3) . . ?
 C6 C1 C2 118.5(3) . . ?
 O6 C33 C28 116.0(3) . . ?
 O6 C33 C32 122.9(3) . . ?
 C32 C33 C28 121.1(3) . . ?
 N5 C47 H47 117.5 . . ?
 N5 C47 C46 125.1(3) . . ?
 C46 C47 H47 117.5 . . ?
 O7 C34 C35 118.1(3) . . ?
 N4 C34 O7 114.0(3) . . ?
 N4 C34 C35 127.8(3) . . ?
 O4 C20 C15 122.8(3) . . ?
 O4 C20 C19 119.1(3) . . ?
 C19 C20 C15 118.1(3) . . ?
 C31 C32 C33 114.5(3) . . ?
 C31 C32 H32 122.8 . . ?
 C33 C32 H32 122.8 . . ?
 C6 C5 H5 119.4 . . ?
 C4 C5 C6 121.2(3) . . ?
 C4 C5 H5 119.4 . . ?
 O5 C21 C26 120.7(3) . . ?
 O5 C21 C22 120.0(3) . . ?
 C22 C21 C26 119.3(3) . . ?
 C59 C58 H58 119.0 . . ?
 C59 C58 C57 122.1(3) . . ?
 C57 C58 H58 119.0 . . ?
 C15 C16 H16 119.5 . . ?
 C17 C16 C15 120.9(3) . . ?
 C17 C16 H16 119.5 . . ?
 N3 C27 H27 116.9 . . ?
 N3 C27 C26 126.3(3) . . ?
 C26 C27 H27 116.9 . . ?
 C60 C59 H59 120.0 . . ?
 C58 C59 C60 120.1(3) . . ?
 C58 C59 H59 120.0 . . ?
 C20 C19 H19 119.6 . . ?
 C18 C19 C20 120.9(3) . . ?
 C18 C19 H19 119.6 . . ?
 C41 C46 C47 120.9(3) . . ?
 C45 C46 C47 119.2(3) . . ?
 C45 C46 C41 119.8(3) . . ?
 O9 C41 C46 122.0(3) . . ?
 O9 C41 C42 120.0(4) . . ?
 C42 C41 C46 118.0(4) . . ?
 C16 C17 H17 120.4 . . ?
 C18 C17 C16 119.2(3) . . ?
 C18 C17 H17 120.4 . . ?
 C5 C4 H4 120.8 . . ?
 C5 C4 C3 118.4(4) . . ?
 C3 C4 H4 120.8 . . ?
 C22 C23 H23 119.5 . . ?
 C22 C23 C24 121.1(4) . . ?
 C24 C23 H23 119.5 . . ?
 C21 C26 C27 122.1(3) . . ?
 C21 C26 C25 118.7(3) . . ?
 C27 C26 C25 119.1(3) . . ?
 C4 C3 H3 118.8 . . ?
 C2 C3 C4 122.5(3) . . ?
 C2 C3 H3 118.8 . . ?
 C56 C57 C58 118.2(3) . . ?
 C56 C57 H57 120.9 . . ?
 C58 C57 H57 120.9 . . ?
 C36 C37 H37 120.3 . . ?
 C36 C37 C38 119.3(4) . . ?
 C38 C37 H37 120.3 . . ?
 C37 C38 H38 119.3 . . ?
 C39 C38 C37 121.3(3) . . ?
 C39 C38 H38 119.3 . . ?
 C40 C39 H39 120.0 . . ?
 C38 C39 C40 120.0(3) . . ?
 C38 C39 H39 120.0 . . ?
 C1 C2 H2 120.3 . . ?
 C3 C2 C1 119.3(3) . . ?
 C3 C2 H2 120.3 . . ?
 C19 C18 C17 121.5(3) . . ?
 C19 C18 H18 119.2 . . ?
 C17 C18 H18 119.2 . . ?
 C21 C22 H22 119.8 . . ?
 C23 C22 C21 120.3(4) . . ?
 C23 C22 H22 119.8 . . ?
 C45 C44 H44 121.1 . . ?
 C45 C44 C43 117.9(4) . . ?
 C43 C44 H44 121.1 . . ?
 C46 C45 H45 118.9 . . ?
 C44 C45 C46 122.2(4) . . ?
 C44 C45 H45 118.9 . . ?
 C23 C24 H24 120.4 . . ?
 C25 C24 C23 119.1(4) . . ?
 C25 C24 H24 120.4 . . ?
 C41 C42 H42 120.4 . . ?
 C41 C42 C43 119.1(4) . . ?
 C43 C42 H42 120.4 . . ?
 C44 C43 C42 123.0(4) . . ?
 C44 C43 H43 118.5 . . ?
 C42 C43 H43 118.5 . . ?
 C26 C25 H25 119.3 . . ?
 C24 C25 C26 121.3(4) . . ?
 C24 C25 H25 119.3 . . ?

loop_
  _geom_torsion_atom_site_label_1
  _geom_torsion_atom_site_label_2
  _geom_torsion_atom_site_label_3
  _geom_torsion_atom_site_label_4
  _geom_torsion
  _geom_torsion_site_symmetry_1
  _geom_torsion_site_symmetry_2
  _geom_torsion_site_symmetry_3
  _geom_torsion_site_symmetry_4
  _geom_torsion_publ_flag
 V1 O1 C1 C6 35.4(4) . . . . ?
 V1 O1 C1 C2 -146.6(2) . . . . ?
 V1 O2 C13 C8 0.0(3) . . . . ?
 V1 O2 C13 C12 179.5(2) . . . . ?
 V1 O12 C60 C55 -30.9(4) . . . . ?
 V1 O12 C60 C59 151.1(2) . . . . ?
 V1 N6 C54 O11 170.44(16) . . . . ?
 V1 N6 C54 C55 -7.1(4) . . . . ?
 V1 N6 C50 C51 -167.38(18) . . . . ?
 V1 N6 C50 C49 11.5(4) . . . . ?
 V1 N1 C8 C13 -8.1(3) . . . . ?
 V1 N1 C8 C9 172.4(2) . . . . ?
 V1 N1 C7 C6 -16.4(4) . . . . ?
 V3 O10 C53 C52 -175.5(2) . . . . ?
 V3 O10 C53 C48 5.6(3) . . . . ?
 V3 O8 C40 C35 -35.2(5) . . . . ?
 V3 O8 C40 C39 147.1(3) . . . . ?
 V3 O9 C41 C46 37.5(4) . . . . ?
 V3 O9 C41 C42 -146.5(3) . . . . ?
 V3 N5 C48 C53 -7.3(3) . . . . ?
 V3 N5 C48 C49 172.9(2) . . . . ?
 V3 N5 C47 C46 -15.3(4) . . . . ?
 V3 N4 C30 C31 173.8(2) . . . . ?
 V3 N4 C30 C29 -7.8(5) . . . . ?
 V3 N4 C34 O7 -173.90(17) . . . . ?
 V3 N4 C34 C35 9.9(4) . . . . ?
 V2 O4 C20 C15 -26.6(5) . . . . ?
 V2 O4 C20 C19 153.3(2) . . . . ?
 V2 O6 C33 C28 -12.8(4) . . . . ?
 V2 O6 C33 C32 166.9(2) . . . . ?
 V2 O5 C21 C26 14.3(5) . . . . ?
 V2 O5 C21 C22 -167.0(3) . . . . ?
 V2 N2 C14 O3 -172.50(16) . . . . ?
 V2 N2 C14 C15 7.3(4) . . . . ?
 V2 N2 C10 C11 169.52(19) . . . . ?
 V2 N2 C10 C9 -7.7(5) . . . . ?
 V2 N3 C28 C29 -171.8(2) . . . . ?
 V2 N3 C28 C33 8.5(3) . . . . ?
 V2 N3 C27 C26 -9.1(5) . . . . ?
 O3 C11 C10 N2 1.1(3) . . . . ?
 O3 C11 C10 C9 178.7(2) . . . . ?
 O3 C11 C12 C13 -173.9(3) . . . . ?
 O3 C14 C15 C20 -174.2(2) . . . . ?
 O3 C14 C15 C16 5.4(4) . . . . ?
 O11 C54 C55 C56 12.8(4) . . . . ?
 O11 C54 C55 C60 -162.9(2) . . . . ?
 O11 C51 C50 N6 -0.5(3) . . . . ?
 O11 C51 C50 C49 -179.5(2) . . . . ?
 O10 V3 O8 C40 -43.3(3) . . . . ?
 O10 V3 O9 C41 -89.0(3) . . . . ?
 O10 C53 C48 N5 1.6(3) . . . . ?
 O10 C53 C48 C49 -178.5(2) . . . . ?
 O7 C31 C30 N4 0.4(3) . . . . ?
 O7 C31 C30 C29 -178.2(3) . . . . ?
 O7 C31 C32 C33 179.7(3) . . . . ?
 O1 V1 O12 C60 103.3(3) . . . . ?
 O1 C1 C2 C3 -178.3(3) . . . . ?
 O2 V1 O1 C1 -84.4(3) . . . . ?
 O2 V1 O12 C60 -56.2(3) . . . . ?
 O2 C13 C12 C11 175.3(3) . . . . ?
 O4 V2 O5 C21 177.0(3) . . . . ?
 O4 C20 C19 C18 -178.8(3) . . . . ?
 O8 V3 O9 C41 149.7(3) . . . . ?
 O8 C40 C39 C38 178.9(3) . . . . ?
 O12 V1 O1 C1 150.0(2) . . . . ?
 O12 C60 C59 C58 176.8(3) . . . . ?
 O6 V2 O4 C20 -48.5(3) . . . . ?
 O6 V2 O5 C21 -62.7(5) . . . . ?
 O6 C33 C32 C31 179.3(3) . . . . ?
 O9 V3 O8 C40 115.1(3) . . . . ?
 O9 C41 C42 C43 -178.0(3) . . . . ?
 O5 V2 O4 C20 110.9(3) . . . . ?
 O5 C21 C26 C27 -2.4(5) . . . . ?
 O5 C21 C26 C25 174.7(3) . . . . ?
 O5 C21 C22 C23 -175.6(3) . . . . ?
 O13 V1 O1 C1 48.1(2) . . . . ?
 O13 V1 O12 C60 -158.1(3) . . . . ?
 O15 V3 O8 C40 -146.2(3) . . . . ?
 O15 V3 O9 C41 47.0(3) . . . . ?
 O14 V2 O4 C20 -146.9(3) . . . . ?
 O14 V2 O5 C21 74.3(3) . . . . ?
 N6 V1 O1 C1 -134.7(2) . . . . ?
 N6 V1 O12 C60 29.9(3) . . . . ?
 N6 C54 C55 C56 -169.7(3) . . . . ?
 N6 C54 C55 C60 14.6(4) . . . . ?
 N6 C50 C49 C48 -177.4(3) . . . . ?
 N5 V3 O8 C40 -7.2(5) . . . . ?
 N5 V3 O9 C41 -45.4(3) . . . . ?
 N5 C48 C49 C50 178.0(3) . . . . ?
 N5 C47 C46 C41 -8.7(5) . . . . ?
 N5 C47 C46 C45 175.2(3) . . . . ?
 N1 V1 O1 C1 -44.3(2) . . . . ?
 N1 V1 O12 C60 -20.3(5) . . . . ?
 N1 C8 C13 O2 5.6(4) . . . . ?
 N1 C8 C13 C12 -174.0(2) . . . . ?
 N1 C8 C9 C10 178.0(3) . . . . ?
 N2 V2 O4 C20 30.9(3) . . . . ?
 N2 V2 O5 C21 -103.9(3) . . . . ?
 N2 C14 C15 C20 6.0(5) . . . . ?
 N2 C14 C15 C16 -174.4(3) . . . . ?
 N3 V2 O4 C20 -6.0(6) . . . . ?
 N3 V2 O5 C21 -16.4(3) . . . . ?
 N3 C28 C29 C30 179.2(3) . . . . ?
 N3 C28 C33 O6 1.8(4) . . . . ?
 N3 C28 C33 C32 -177.9(3) . . . . ?
 N3 C27 C26 C21 1.6(6) . . . . ?
 N3 C27 C26 C25 -175.4(3) . . . . ?
 N4 V3 O8 C40 39.0(3) . . . . ?
 N4 V3 O9 C41 -133.1(3) . . . . ?
 N4 C30 C29 C28 -179.7(3) . . . . ?
 C54 O11 C51 C52 -175.5(3) . . . . ?
 C54 O11 C51 C50 2.3(3) . . . . ?
 C54 N6 C50 C51 -1.7(3) . . . . ?
 C54 N6 C50 C49 177.1(3) . . . . ?
 C54 C55 C56 C57 -177.5(3) . . . . ?
 C54 C55 C60 O12 0.4(4) . . . . ?
 C54 C55 C60 C59 178.5(3) . . . . ?
 C52 C53 C48 N5 -177.3(2) . . . . ?
 C52 C53 C48 C49 2.6(4) . . . . ?
 C52 C51 C50 N6 177.4(3) . . . . ?
 C52 C51 C50 C49 -1.6(4) . . . . ?
 C11 O3 C14 N2 1.2(3) . . . . ?
 C11 O3 C14 C15 -178.7(2) . . . . ?
 C53 C52 C51 O11 179.6(2) . . . . ?
 C53 C52 C51 C50 2.1(4) . . . . ?
 C53 C48 C49 C50 -1.9(4) . . . . ?
 C8 N1 C7 C6 175.7(2) . . . . ?
 C8 C13 C12 C11 -5.1(4) . . . . ?
 C8 C9 C10 N2 174.4(3) . . . . ?
 C8 C9 C10 C11 -2.6(4) . . . . ?
 C51 O11 C54 N6 -3.8(3) . . . . ?
 C51 O11 C54 C55 174.1(2) . . . . ?
 C51 C52 C53 O10 178.7(2) . . . . ?
 C51 C52 C53 C48 -2.5(4) . . . . ?
 C51 C50 C49 C48 1.3(4) . . . . ?
 C48 N5 C47 C46 173.7(3) . . . . ?
 C50 N6 C54 O11 3.4(3) . . . . ?
 C50 N6 C54 C55 -174.1(3) . . . . ?
 C31 O7 C34 N4 -1.6(3) . . . . ?
 C31 O7 C34 C35 174.9(3) . . . . ?
 C31 C30 C29 C28 -1.4(4) . . . . ?
 C55 C56 C57 C58 -0.5(4) . . . . ?
 C55 C60 C59 C58 -1.3(4) . . . . ?
 C13 C8 C9 C10 -1.4(4) . . . . ?
 C9 C8 C13 O2 -174.9(3) . . . . ?
 C9 C8 C13 C12 5.5(4) . . . . ?
 C14 O3 C11 C10 -1.3(3) . . . . ?
 C14 O3 C11 C12 174.5(3) . . . . ?
 C14 N2 C10 C11 -0.4(3) . . . . ?
 C14 N2 C10 C9 -177.5(3) . . . . ?
 C14 C15 C20 O4 -2.0(4) . . . . ?
 C14 C15 C20 C19 178.1(3) . . . . ?
 C14 C15 C16 C17 -178.8(3) . . . . ?
 C35 C40 C39 C38 1.0(5) . . . . ?
 C35 C36 C37 C38 -0.2(5) . . . . ?
 C40 C35 C36 C37 -1.1(5) . . . . ?
 C40 C35 C34 O7 -169.2(3) . . . . ?
 C40 C35 C34 N4 6.9(5) . . . . ?
 C30 N4 C34 O7 1.9(3) . . . . ?
 C30 N4 C34 C35 -174.3(3) . . . . ?
 C30 C31 C32 C33 -1.7(5) . . . . ?
 C6 C1 C2 C3 -0.3(4) . . . . ?
 C6 C5 C4 C3 -0.1(4) . . . . ?
 C7 N1 C8 C13 160.9(3) . . . . ?
 C7 N1 C8 C9 -18.6(4) . . . . ?
 C7 C6 C1 O1 1.7(4) . . . . ?
 C7 C6 C1 C2 -176.3(3) . . . . ?
 C7 C6 C5 C4 176.6(3) . . . . ?
 C36 C35 C40 O8 -177.0(3) . . . . ?
 C36 C35 C40 C39 0.7(5) . . . . ?
 C36 C35 C34 O7 8.4(4) . . . . ?
 C36 C35 C34 N4 -175.6(3) . . . . ?
 C36 C37 C38 C39 1.9(6) . . . . ?
 C15 C20 C19 C18 1.1(5) . . . . ?
 C15 C16 C17 C18 0.4(5) . . . . ?
 C10 N2 C14 O3 -0.5(3) . . . . ?
 C10 N2 C14 C15 179.3(3) . . . . ?
 C10 C11 C12 C13 1.2(4) . . . . ?
 C12 C11 C10 N2 -174.8(3) . . . . ?
 C12 C11 C10 C9 2.8(5) . . . . ?
 C28 N3 C27 C26 178.2(3) . . . . ?
 C28 C33 C32 C31 -0.9(5) . . . . ?
 C56 C55 C60 O12 -175.4(3) . . . . ?
 C56 C55 C60 C59 2.7(4) . . . . ?
 C60 C55 C56 C57 -1.8(4) . . . . ?
 C29 C28 C33 O6 -177.9(3) . . . . ?
 C29 C28 C33 C32 2.4(5) . . . . ?
 C1 C6 C7 N1 -8.6(4) . . . . ?
 C1 C6 C5 C4 1.1(4) . . . . ?
 C33 C28 C29 C30 -1.1(4) . . . . ?
 C47 N5 C48 C53 164.6(3) . . . . ?
 C47 N5 C48 C49 -15.3(4) . . . . ?
 C47 C46 C41 O9 -0.1(5) . . . . ?
 C47 C46 C41 C42 -176.3(3) . . . . ?
 C47 C46 C45 C44 177.9(3) . . . . ?
 C34 O7 C31 C30 0.6(3) . . . . ?
 C34 O7 C31 C32 179.5(3) . . . . ?
 C34 N4 C30 C31 -1.4(3) . . . . ?
 C34 N4 C30 C29 177.0(3) . . . . ?
 C34 C35 C40 O8 0.6(5) . . . . ?
 C34 C35 C40 C39 178.3(3) . . . . ?
 C34 C35 C36 C37 -178.7(3) . . . . ?
 C20 C15 C16 C17 0.8(5) . . . . ?
 C20 C19 C18 C17 0.1(5) . . . . ?
 C32 C31 C30 N4 -178.4(3) . . . . ?
 C32 C31 C30 C29 3.0(5) . . . . ?
 C5 C6 C7 N1 176.0(3) . . . . ?
 C5 C6 C1 O1 177.0(3) . . . . ?
 C5 C6 C1 C2 -0.9(4) . . . . ?
 C5 C4 C3 C2 -1.2(5) . . . . ?
 C21 C26 C25 C24 2.2(6) . . . . ?
 C16 C15 C20 O4 178.4(3) . . . . ?
 C16 C15 C20 C19 -1.5(4) . . . . ?
 C16 C17 C18 C19 -0.8(5) . . . . ?
 C27 N3 C28 C29 1.8(5) . . . . ?
 C27 N3 C28 C33 -177.9(3) . . . . ?
 C27 C26 C25 C24 179.3(4) . . . . ?
 C59 C58 C57 C56 1.9(5) . . . . ?
 C46 C41 C42 C43 -1.8(5) . . . . ?
 C41 C46 C45 C44 1.8(5) . . . . ?
 C41 C42 C43 C44 2.5(6) . . . . ?
 C4 C3 C2 C1 1.4(5) . . . . ?
 C23 C24 C25 C26 0.8(6) . . . . ?
 C26 C21 C22 C23 3.2(6) . . . . ?
 C57 C58 C59 C60 -1.0(5) . . . . ?
 C37 C38 C39 C40 -2.4(6) . . . . ?
 C22 C21 C26 C27 178.9(3) . . . . ?
 C22 C21 C26 C25 -4.1(5) . . . . ?
 C22 C23 C24 C25 -1.8(6) . . . . ?
 C45 C46 C41 O9 175.9(3) . . . . ?
 C45 C46 C41 C42 -0.2(5) . . . . ?
 C45 C44 C43 C42 -0.9(6) . . . . ?
 C24 C23 C22 C21 -0.2(6) . . . . ?
 C43 C44 C45 C46 -1.2(5) . . . . ?

_smtbx_masks_special_details
;
A solvent mask was calculated and 252 electrons were 
found in a volume of 1107\%A^3^ in 2 voids per unit cell. 
This is consistent with the presence of 
3[C3H7NO], 0.5[H2O] per Asymmetric Unit 
which account for 250 electrons 
per unit cell.
;
loop_
  _smtbx_masks_void_nr
  _smtbx_masks_void_average_x
  _smtbx_masks_void_average_y
  _smtbx_masks_void_average_z
  _smtbx_masks_void_volume
  _smtbx_masks_void_count_electrons
  _smtbx_masks_void_content
 1 -0.238 -0.667 -0.667 1066.9 244.1 '6 DMF'
 2 0.500 1.000 0.500 40.4 7.9 '1 H2O'

_smtbx_masks_void_probe_radius     1.2
_smtbx_masks_void_truncation_radius  1.2
_shelx_res_file
;
TITL shelx_trans_a.res in P-1
    shelx_trans.res
    created by SHELXL-2016/6 at 16:27:23 on 01-Aug-2023
REM Old TITL shelx_trans in P-1 #2
REM SHELXT solution in P-1
REM R1 0.232, Rweak 0.012, Alpha 0.049, Orientation as input
REM Formula found by SHELXT: C66 N7 O16 V3
CELL 0.71075 12.465 16.2435 18.285 102.995 98.16 108.586
ZERR 2 0.005 0.0062 0.008 0.032 0.03 0.027
LATT 1
SFAC C H N O V
UNIT 120 66 12 30 6

L.S. 20
PLAN  20
SIZE 0.22 0.14 0.08
TEMP -160.15
CONF
BOND $H
list 4
MORE -1
fmap 2
acta
ABIN
OMIT 0 3 1
OMIT 5 0 1
OMIT -2 -1 1
OMIT -1 -3 1
OMIT 5 -1 2
OMIT -3 4 0
OMIT 3 -6 1
OMIT 3 -4 1
REM <olex2.extras>
REM <HklSrc "%.\\shelx_trans.hkl">
REM </olex2.extras>

WGHT    0.091900
EXTI    0.007436
FVAR       0.43625
V1    5    0.744147    0.902352    0.274165    11.00000    0.04889    0.03323 =
         0.02959    0.00380    0.00502    0.01583
V3    5    0.278613    0.674733    0.517196    11.00000    0.03851    0.03771 =
         0.04445    0.00600    0.01298    0.01639
V2    5    0.234615    0.375031    0.076809    11.00000    0.04672    0.03962 =
         0.03585    0.00380   -0.00081    0.02267
O3    4    0.620886    0.481701    0.079146    11.00000    0.04336    0.03425 =
         0.03096    0.00242    0.00192    0.02258
O11   4    0.819699    0.825595    0.493374    11.00000    0.03528    0.04107 =
         0.02638    0.00457    0.00296    0.01666
O10   4    0.445196    0.714087    0.557860    11.00000    0.04647    0.04196 =
         0.03268    0.00939    0.01305    0.01893
O7    4    0.360375    0.424167    0.445940    11.00000    0.04342    0.04138 =
         0.03593    0.00900    0.01078    0.02306
O1    4    0.658346    0.958006    0.332293    11.00000    0.05658    0.03438 =
         0.03293    0.00164    0.00343    0.02073
O2    4    0.781448    0.800159    0.222393    11.00000    0.04422    0.03936 =
         0.03082    0.00379    0.00388    0.01778
O4    4    0.273023    0.290453    0.013692    11.00000    0.04712    0.04077 =
         0.03477    0.00147   -0.00394    0.02190
O8    4    0.257813    0.613891    0.590630    11.00000    0.04758    0.04252 =
         0.04700    0.01170    0.01809    0.01795
O12   4    0.898531    0.960375    0.325751    11.00000    0.04887    0.03530 =
         0.03642    0.00662    0.01087    0.01188
O6    4    0.312899    0.355125    0.167127    11.00000    0.05064    0.04132 =
         0.03469    0.00170    0.00370    0.02540
O9    4    0.139928    0.619052    0.438640    11.00000    0.03807    0.04295 =
         0.06106    0.01168    0.01038    0.01664
O5    4    0.204622    0.442173    0.011655    11.00000    0.05123    0.04958 =
         0.04204    0.00889    0.00242    0.03073
O13   4    0.740798    0.954379    0.209664    11.00000    0.06658    0.04170 =
         0.03665    0.00923    0.00888    0.02421
O15   4    0.249106    0.761807    0.555143    11.00000    0.04345    0.04251 =
         0.06069    0.00563    0.02088    0.01870
O14   4    0.103326    0.315280    0.075725    11.00000    0.05034    0.05030 =
         0.05347    0.01009    0.00158    0.02193
N6    3    0.743422    0.841940    0.379831    11.00000    0.03420    0.03355 =
         0.02807    0.00334    0.00510    0.01237
N5    3    0.346563    0.731167    0.433496    11.00000    0.03206    0.03417 =
         0.04045    0.00387    0.00697    0.01610
N1    3    0.577601    0.801535    0.219378    11.00000    0.05157    0.03510 =
         0.02701    0.00648    0.00526    0.02350
N2    3    0.435498    0.466545    0.084555    11.00000    0.04794    0.03473 =
         0.02845    0.00357    0.00223    0.02442
N3    3    0.235314    0.483199    0.166167    11.00000    0.04247    0.03968 =
         0.03764    0.00522    0.00358    0.02070
N4    3    0.304448    0.544514    0.454379    11.00000    0.04342    0.03653 =
         0.03700    0.00546    0.01044    0.01655
C54   1    0.836980    0.853880    0.428150    11.00000    0.03806    0.03335 =
         0.02637    0.00097    0.00293    0.01286
C52   1    0.638444    0.768730    0.538035    11.00000    0.04019    0.03710 =
         0.02708    0.00567    0.00478    0.01883
AFIX  43
H52   2    0.675081    0.765300    0.585905    11.00000   -1.20000
AFIX   0
C11   1    0.622063    0.567093    0.114165    11.00000    0.04732    0.03319 =
         0.02587    0.00280   -0.00124    0.02099
C53   1    0.518927    0.745115    0.515430    11.00000    0.03318    0.03122 =
         0.03088    0.00387    0.00599    0.01253
C8    1    0.580571    0.715075    0.183564    11.00000    0.04624    0.03422 =
         0.02560    0.00425    0.00079    0.02434
C51   1    0.700708    0.797886    0.485132    11.00000    0.03450    0.03494 =
         0.02950    0.00270    0.00389    0.01459
C48   1    0.467625    0.754736    0.444103    11.00000    0.03160    0.03482 =
         0.03490    0.00226    0.00174    0.01448
C50   1    0.651754    0.806878    0.415393    11.00000    0.04388    0.03140 =
         0.02736    0.00356    0.00617    0.01501
C31   1    0.333856    0.431448    0.371487    11.00000    0.03864    0.03836 =
         0.03842    0.00989    0.00769    0.01811
C55   1    0.957676    0.896003    0.424478    11.00000    0.03468    0.03435 =
         0.03351    0.00003    0.00744    0.01261
C13   1    0.696634    0.720776    0.184252    11.00000    0.04745    0.03676 =
         0.02676    0.00701    0.00084    0.01996
C9    1    0.484001    0.634948    0.151273    11.00000    0.04091    0.03624 =
         0.03052    0.00145   -0.00204    0.02015
AFIX  43
H9    2    0.407186    0.632618    0.152561    11.00000   -1.20000
AFIX   0
C14   1    0.505178    0.424865    0.063910    11.00000    0.04353    0.04143 =
         0.02489    0.00525   -0.00007    0.02266
C35   1    0.348536    0.500375    0.572771    11.00000    0.03980    0.03535 =
         0.03758    0.00344    0.00701    0.00986
C40   1    0.307500    0.561118    0.618434    11.00000    0.03839    0.03980 =
         0.04527    0.00933    0.01318    0.00715
C49   1    0.533103    0.784447    0.392637    11.00000    0.03465    0.03548 =
         0.03163    0.00875   -0.00098    0.01162
AFIX  43
H49   2    0.497991    0.788936    0.344794    11.00000   -1.20000
AFIX   0
C30   1    0.298767    0.505407    0.376345    11.00000    0.03232    0.03424 =
         0.04167    0.00680    0.00811    0.01414
C6    1    0.469945    0.901926    0.244903    11.00000    0.05149    0.03361 =
         0.03084    0.00725    0.00702    0.02177
C7    1    0.481628    0.818805    0.207121    11.00000    0.05146    0.03692 =
         0.02622    0.00543    0.00426    0.02256
AFIX  43
H7    2    0.415577    0.773183    0.170809    11.00000   -1.20000
AFIX   0
C36   1    0.393998    0.445188    0.605810    11.00000    0.04430    0.03891 =
         0.03993    0.00599    0.00729    0.01385
AFIX  43
H36   2    0.420207    0.403663    0.574904    11.00000   -1.20000
AFIX   0
C15   1    0.480601    0.329302    0.028068    11.00000    0.05321    0.03970 =
         0.02873    0.00878    0.00547    0.02670
C10   1    0.507008    0.558102    0.116826    11.00000    0.04121    0.03857 =
         0.02491    0.00051   -0.00328    0.02089
C12   1    0.718226    0.645091    0.145455    11.00000    0.04360    0.04186 =
         0.02882    0.00449   -0.00068    0.02296
AFIX  43
H12   2    0.794174    0.647592    0.141109    11.00000   -1.20000
AFIX   0
C28   1    0.268134    0.473661    0.240463    11.00000    0.03572    0.03587 =
         0.03954    0.00799    0.00568    0.01795
C56   1    1.049888    0.891040    0.475299    11.00000    0.03773    0.04518 =
         0.03966    0.00212    0.00857    0.01857
AFIX  43
H56   2    1.033013    0.857594    0.511383    11.00000   -1.20000
AFIX   0
C60   1    0.982446    0.947819    0.372218    11.00000    0.03781    0.03217 =
         0.03453   -0.00211    0.00707    0.01287
C29   1    0.263736    0.527202    0.310111    11.00000    0.03804    0.03759 =
         0.04140    0.00762    0.00780    0.01622
AFIX  43
H29   2    0.237867    0.576556    0.312241    11.00000   -1.20000
AFIX   0
C1    1    0.558837    0.968154    0.307026    11.00000    0.06011    0.03554 =
         0.03117    0.01010    0.01507    0.02315
C33   1    0.309224    0.399649    0.237107    11.00000    0.04223    0.03734 =
         0.03584    0.00450    0.00421    0.02191
C47   1    0.285689    0.753547    0.381671    11.00000    0.04422    0.03974 =
         0.04247    0.00432    0.00228    0.02275
AFIX  43
H47   2    0.327436    0.791875    0.354836    11.00000   -1.20000
AFIX   0
C34   1    0.338499    0.493992    0.492016    11.00000    0.03446    0.03147 =
         0.03836    0.00328    0.00759    0.01203
C20   1    0.364330    0.266537    0.003537    11.00000    0.05901    0.03863 =
         0.02753    0.00624    0.00132    0.02412
C32   1    0.342514    0.376691    0.304112    11.00000    0.05156    0.03809 =
         0.03971    0.00882    0.00986    0.02666
AFIX  43
H32   2    0.368790    0.327729    0.303386    11.00000   -1.20000
AFIX   0
C5    1    0.363951    0.914129    0.222781    11.00000    0.05720    0.04230 =
         0.03781    0.01181    0.01042    0.02839
AFIX  43
H5    2    0.304372    0.868813    0.181677    11.00000   -1.20000
AFIX   0
C21   1    0.168476    0.511749    0.014834    11.00000    0.04269    0.04647 =
         0.05549    0.01481    0.00286    0.02425
C58   1    1.187091    0.981951    0.419960    11.00000    0.04684    0.03745 =
         0.05266   -0.00157    0.01904    0.01162
AFIX  43
H58   2    1.265379    1.010100    0.417327    11.00000   -1.20000
AFIX   0
C16   1    0.571770    0.298559    0.017082    11.00000    0.06272    0.04029 =
         0.03626    0.00689    0.00269    0.03124
AFIX  43
H16   2    0.649827    0.340365    0.034089    11.00000   -1.20000
AFIX   0
C27   1    0.199021    0.548401    0.157339    11.00000    0.04554    0.04178 =
         0.04716    0.00347   -0.00317    0.02317
AFIX  43
H27   2    0.193579    0.587532    0.202684    11.00000   -1.20000
AFIX   0
C59   1    1.099040    0.989959    0.370287    11.00000    0.06282    0.03169 =
         0.04578    0.00237    0.02180    0.01018
AFIX  43
H59   2    1.117346    1.024002    0.334778    11.00000   -1.20000
AFIX   0
C19   1    0.345073    0.174795   -0.033130    11.00000    0.06323    0.03573 =
         0.03562    0.00311    0.00352    0.02008
AFIX  43
H19   2    0.267793    0.131702   -0.050875    11.00000   -1.20000
AFIX   0
C46   1    0.161898    0.724720    0.362666    11.00000    0.03798    0.03512 =
         0.04954   -0.00518   -0.00205    0.01820
C41   1    0.092695    0.657984    0.392105    11.00000    0.04518    0.04791 =
         0.05817   -0.00303    0.00272    0.02858
C17   1    0.549581    0.207647   -0.018393    11.00000    0.07152    0.04707 =
         0.04231    0.01050    0.01270    0.04147
AFIX  43
H17   2    0.611915    0.187275   -0.025362    11.00000   -1.20000
AFIX   0
C4    1    0.345477    0.990532    0.259739    11.00000    0.06430    0.04261 =
         0.04894    0.01239    0.02017    0.03092
AFIX  43
H4    2    0.274082    0.998315    0.244542    11.00000   -1.20000
AFIX   0
C23   1    0.103738    0.608057   -0.049926    11.00000    0.04871    0.05772 =
         0.07218    0.02335   -0.00060    0.02382
AFIX  43
H23   2    0.080687    0.621219   -0.096418    11.00000   -1.20000
AFIX   0
C26   1    0.166834    0.566368    0.086148    11.00000    0.03991    0.04927 =
         0.05153    0.01314   -0.00030    0.02160
C3    1    0.434490    1.056482    0.320269    11.00000    0.06110    0.04331 =
         0.05639    0.00522    0.02225    0.02560
AFIX  43
H3    2    0.422773    1.109832    0.345248    11.00000   -1.20000
AFIX   0
C57   1    1.164735    0.933893    0.473816    11.00000    0.03722    0.04363 =
         0.04943   -0.00532    0.00408    0.01481
AFIX  43
H57   2    1.226546    0.930607    0.508555    11.00000   -1.20000
AFIX   0
C37   1    0.401143    0.450573    0.683325    11.00000    0.05947    0.05135 =
         0.04583    0.01284    0.00509    0.02036
AFIX  43
H37   2    0.431874    0.412882    0.705472    11.00000   -1.20000
AFIX   0
C38   1    0.362897    0.511638    0.728170    11.00000    0.07011    0.05504 =
         0.04069    0.01211    0.01529    0.01412
AFIX  43
H38   2    0.370017    0.516673    0.781561    11.00000   -1.20000
AFIX   0
C39   1    0.314590    0.565331    0.696600    11.00000    0.06291    0.04600 =
         0.04603    0.00945    0.01956    0.01635
AFIX  43
H39   2    0.286267    0.604993    0.727827    11.00000   -1.20000
AFIX   0
C2    1    0.539155    1.046796    0.345112    11.00000    0.06044    0.03726 =
         0.04470    0.00155    0.01784    0.02128
AFIX  43
H2    2    0.597021    1.092193    0.387095    11.00000   -1.20000
AFIX   0
C18   1    0.436036    0.147488   -0.043307    11.00000    0.08357    0.03979 =
         0.04133    0.00312    0.00956    0.03527
AFIX  43
H18   2    0.420793    0.085559   -0.068147    11.00000   -1.20000
AFIX   0
C22   1    0.133807    0.532142   -0.053172    11.00000    0.04589    0.06126 =
         0.05655    0.01757   -0.00350    0.02723
AFIX  43
H22   2    0.130855    0.493899   -0.101686    11.00000   -1.20000
AFIX   0
C44   1   -0.010503    0.732230    0.287562    11.00000    0.04935    0.05263 =
         0.06214   -0.00454   -0.00733    0.02931
AFIX  43
H44   2   -0.045317    0.757082    0.252864    11.00000   -1.20000
AFIX   0
C45   1    0.108126    0.759249    0.310151    11.00000    0.04780    0.04514 =
         0.05230   -0.00194   -0.00148    0.02779
AFIX  43
H45   2    0.155595    0.802671    0.289715    11.00000   -1.20000
AFIX   0
C24   1    0.106854    0.665240    0.020485    11.00000    0.05615    0.05300 =
         0.07727    0.01512   -0.01301    0.02753
AFIX  43
H24   2    0.088236    0.717876    0.022172    11.00000   -1.20000
AFIX   0
C42   1   -0.029377    0.628604    0.367346    11.00000    0.03774    0.05728 =
         0.07374    0.00173    0.00400    0.01717
AFIX  43
H42   2   -0.078653    0.582700    0.384641    11.00000   -1.20000
AFIX   0
C43   1   -0.077202    0.668230    0.316654    11.00000    0.04872    0.07660 =
         0.06797   -0.00109   -0.00523    0.03556
AFIX  43
H43   2   -0.159441    0.649742    0.301968    11.00000   -1.20000
AFIX   0
C25   1    0.137187    0.644450    0.087331    11.00000    0.05216    0.04622 =
         0.07297    0.00589   -0.00806    0.02518
AFIX  43
H25   2    0.138444    0.682842    0.135305    11.00000   -1.20000
AFIX   0
HKLF 4


REM  shelx_trans_a.res in P-1
REM R1 =  0.0568 for    8693 Fo > 4sig(Fo)  and  0.0852 for all   14423 data
REM    758 parameters refined using      0 restraints

END

WGHT      0.0892      0.0000

REM Highest difference peak  0.410,  deepest hole -0.607,  1-sigma level  0.067
Q1    1  -0.0922  0.6559  0.3597  11.00000  0.05    0.41
Q2    1   0.2798  0.3114  0.0900  11.00000  0.05    0.40
Q3    1   0.1468  0.6213  0.4870  11.00000  0.05    0.39
Q4    1   0.2946  0.3970  0.1609  11.00000  0.05    0.36
Q5    1   0.2140  0.5804  0.4995  11.00000  0.05    0.34
Q6    1   0.2500  0.6601  0.4396  11.00000  0.05    0.32
Q7    1   0.2199  0.7324  0.4953  11.00000  0.05    0.31
Q8    1   0.2785  0.7076  0.5867  11.00000  0.05    0.30
Q9    1  -0.0445  0.6130  0.4134  11.00000  0.05    0.30
Q10   1   0.8176  0.9954  0.2808  11.00000  0.05    0.30
Q11   1   0.7978  0.9279  0.3578  11.00000  0.05    0.30
Q12   1   0.3040  0.7243  0.5903  11.00000  0.05    0.29
Q13   1   0.0708  0.7410  0.3440  11.00000  0.05    0.29
Q14   1   0.3422  0.5174  0.5819  11.00000  0.05    0.28
Q15   1   0.6583  0.8318  0.4308  11.00000  0.05    0.28
Q16   1   0.6544  0.9096  0.3118  11.00000  0.05    0.28
Q17   1   0.3809  0.6606  0.4897  11.00000  0.05    0.28
Q18   1   1.1026  0.9821  0.3531  11.00000  0.05    0.27
Q19   1   0.2076  0.8007  0.2811  11.00000  0.05    0.27
Q20   1   0.4032  0.7124  0.5154  11.00000  0.05    0.27
;
_shelx_res_checksum                77668
_shelx_hkl_file
;
   0   1   2 6867.26 2170.39
   0  -2   2   55.31    4.60
   0  -2   2   51.24    7.78
   0   2  -2   55.04    6.13
  -1   2   1 2091.57   25.79
  -1   2   1 2038.12   25.60
   1  -2  -1 1954.94   24.05
  -1  -1  -1  681.99   22.61
   1   1   1  687.28   22.77
  -1  -1  -1  710.87   23.52
   1   1   1  688.95   22.73
  -1   0  -2 1335.52   16.15
   1   0   2 1353.38   17.02
  -1   0  -2 1309.80   22.58
   1   0   2 1292.19   25.11
   2  -1   0  134.18    7.22
   2  -1   0  116.06   11.03
  -2   1   0  124.14    7.25
   1  -2   2  252.58   15.08
  -1   2  -2  239.92   15.35
   1  -2   2  273.12   14.03
  -1   2  -2  270.14   13.89
  -2   1   1  488.33   16.52
   2  -1  -1  488.79   16.20
  -2   1   1  499.62   16.77
   2  -1  -1  509.44   16.95
   0   1  -3  166.96   10.08
   0  -1   3  183.56   11.34
   0  -1   3  178.92    9.13
   0   1  -3  178.34    9.41
   2   0  -1 1853.47   22.15
   2   0  -1 1867.42   22.39
   0   0   3  138.26    7.22
   0   0   3  156.40   11.80
   0   0  -3  156.01   11.64
   0   0  -3  135.55    7.33
  -2   0   0 2255.59   26.98
   2   0   0 2280.62   27.20
   2   0   0 2275.96   27.40
  -2   2   0   30.57    6.53
   2  -2   0   38.13   10.28
   2  -2   0   29.05    9.67
  -2   2   0    0.91    4.60
  -2   1  -1  126.80   17.33
   2  -1   1  126.03    7.07
  -2   1  -1  127.22    9.41
   2  -1   1  146.30   21.45
   1   1  -3 1733.04   21.50
  -1  -2   2 1593.38   19.19
  -1  -2   2 1600.25   19.96
   2   0  -2   78.38    6.34
  -2   0   2   82.36    6.72
   2   0  -2   88.18    6.14
   1   2   0 1671.81   20.75
  -2   2   1  817.52   14.68
   2  -2  -1  811.56   14.58
   2  -2  -1  816.67   11.74
   2  -2  -1  813.79   13.81
   2  -1  -2  347.44   13.10
  -2   1   2  299.32   15.25
   2  -1  -2  303.42   15.90
   2  -1  -2  317.15  100.25
   0  -2   3  474.79   15.76
   0   2  -3  483.57   16.91
   0  -2   3  491.87   17.06
  -2   2  -1 1101.16   14.35
   2  -2   1 1089.19   13.81
   2  -2   1 1129.69   20.96
  -2   2  -1 1078.53   21.22
  -1   3  -1 2033.70   25.20
   1  -3   1 1895.29   25.65
   1  -3   1 1966.34   24.18
  -1   2   2 3818.73   45.79
   1  -3   0 4184.23   50.87
  -1   3   0 4355.47 1376.58
  -1   3   0 3951.94   47.31
   1  -1  -3    0.02    1.13
  -1   1   3    0.54    0.71
   0  -3   1  107.93    8.93
   0   3  -1   87.30    7.51
   0   3  -1  100.74    7.23
   0  -3   1  101.05    7.56
  -1   1  -3 1004.70   21.14
   1  -1   3  973.62   12.09
  -1   1  -3  986.12   12.45
   1  -1   3  956.58   22.13
   2   0   1    8.98    2.84
  -2   0  -1    2.88    2.47
   2   0   1   11.11    3.54
  -2   0  -1   12.81    3.22
  -1  -1  -2 1302.50   17.64
   1   1   2 1284.74   16.10
  -1  -1  -2 1279.75   15.88
   1   1   2 1238.30   15.10
   2   1  -1   33.82    4.50
  -2  -1   1   43.30    8.77
  -2  -1   1   33.67    3.76
   2   1  -1   35.89    5.34
  -1   3  -2  204.23   12.06
   1  -3   2  223.88   12.90
   1  -3   2  207.65   11.23
  -1   3  -2  217.29   12.22
   0  -2  -2 2689.73   32.45
   0   2   2 2845.51   35.53
  -1   2  -3 1766.63   25.46
   1  -2   3 1900.43   28.89
   1  -2   3 1836.82   22.11
  -1   2  -3 1810.83   21.88
   0  -3   2 1127.27   15.72
   0   3  -2 1119.03   14.68
   0  -3   2 1103.44   14.36
   0   3  -2 1092.34   15.50
   0   1   3  203.99   16.03
   0  -1  -3  229.62   17.69
   0   1   3  215.17   11.35
   0  -1  -3  207.23   11.21
   0   3   0   24.19    5.32
   0   3   0   23.58    5.67
   0  -3   0   23.55    5.54
   0  -3   0   25.05    6.51
   2   1  -2   58.18    4.83
   2   1  -2   55.33    4.97
  -2  -1   2   55.87    5.68
  -2  -1   2   62.67    4.98
   1  -3  -1   82.44    9.19
  -1   3   1   87.20    9.61
   1  -3  -1   87.26    6.22
  -1   3   1   88.08    6.25
  -1  -2   3  971.34   12.76
   1   2  -3  942.89   12.22
  -2   1  -2  319.89  102.50
  -1   0  -3  118.49    7.00
   1   0   3  125.70    7.18
   1   0   3  116.46   19.46
  -1   0  -3   99.40   18.09
   2  -2  -2   12.96    6.31
   2  -2  -2   12.54    4.96
  -2   2   2    5.55    4.39
  -1  -2  -1 1645.58   21.63
  -1  -2  -1 1573.47   19.34
  -2   2  -2   34.93    7.15
   2  -2   2   37.57    7.10
  -2   2  -2   43.20   15.78
   2  -2   2   33.80   12.05
  -2   3   0   30.15    7.22
   2  -3   0   52.08    7.73
   2  -3   0   66.56   11.51
   2  -3   0   70.78    7.16
  -2   3  -1   61.73    7.56
  -2   3  -1   41.35   10.72
   2  -3   1   45.69    9.26
   2  -3   1   55.20    6.09
   0   1  -4 1461.57   21.40
   0  -1   4 1423.14   17.19
  -2   1   3   80.90    5.72
  -2   1   3   84.26    8.30
   2  -1  -3   84.90    7.56
   2  -1  -3   68.42    4.78
   0  -3   3 1565.54   20.34
   2  -3  -1 1041.95   14.33
  -2   3   1  994.35   15.22
   2  -3  -1  962.09   16.36
  -2   3   1 1078.40   18.19
   1   1  -4 1024.85   13.64
  -1  -1   4 1066.66   14.21
  -1  -1   4 1068.21   13.19
   1   1  -4 1071.27   12.96
   0   3   1   74.90    7.09
   0  -3  -1   85.69    9.52
   0  -3  -1   73.69    5.59
   0   3   1   77.95    5.83
   1   0  -4   84.88    7.21
   1   0  -4   86.58    7.03
  -1   0   4   82.16    5.84
  -1   0   4   90.06    7.39
   2   1  -3  752.74   24.78
  -2  -1   3  728.06   26.03
   2   1  -3  730.67   24.37
  -1   3  -3  705.30   23.74
   1  -3   3  664.27   22.16
   1  -3   3  752.07   26.62
  -1   3  -3  738.73   26.86
   2   0   2  337.06   12.16
   2   0   2  361.98   13.80
   2   0   2  410.68   24.12
  -2   0  -2  340.26   12.35
   0   0  -4  228.50   12.25
   0   0  -4  262.85   18.87
   0   0   4  233.17   15.09
   0   0   4  231.09   12.04
  -2  -1  -1  735.02   26.39
   2   1   1  711.63   23.95
   2   1   1  732.66   24.53
  -2  -1  -1  738.28   24.88
   1  -2  -3   88.29    7.89
  -1   2   3   85.06    7.58
  -1   2   3  100.44    8.68
  -2   3  -2  653.10   26.84
   2  -3   2  728.96   28.43
   2  -3   2  698.49   23.59
  -2   3  -2  694.82   23.72
   1   3  -1   36.00    4.49
  -1  -3   1   47.36    7.37
   1   3  -1   44.07    6.06
  -1  -3   1   48.46    6.95
  -1  -3   2 1464.92   19.22
  -1  -3   2 1479.97   20.59
  -1   3   2 1553.93   19.01
  -1   3   2 1531.79   21.59
   1  -3  -2 1591.49   19.05
   1  -3  -2 1552.17   20.90
  -3   1   1 3133.36   37.72
  -3   1   1 3350.86   40.55
  -3   1   0 2099.44   26.23
   2   2  -1  555.18   18.61
  -2  -2   1  553.05   18.60
  -2  -2   1  557.05   19.22
   2   2  -1  572.14   19.65
   1   1   3  424.10   22.29
   1   1   3  507.90   17.65
   1   1   3  510.17   18.78
  -1  -1  -3  516.68   18.06
  -1  -2   4  967.07   13.19
   1   2  -4 1001.60   13.56
  -1  -2   4 1004.25   12.76
   1   2  -4 1045.26   12.59
  -1   4  -1 1791.98   23.00
   1  -4   1 1743.64   24.11
  -1   4  -1 1757.15   25.02
   1  -4   1 1748.44   22.27
   3  -2   0    1.29    9.00
  -3   2   0    6.34    8.56
  -3   2   0    6.91    4.04
   2   2  -2  418.17   15.38
  -2  -2   2  413.74   15.47
   2   2  -2  446.59   15.11
  -2  -2   2  404.58   13.58
   1  -1  -4  182.65   11.01
  -1   1   4  186.80   10.29
  -1   1   4  206.51   11.80
   1  -1  -4  193.27   12.53
   2  -2  -3  262.10   14.91
  -2   2   3  270.95   16.19
   2  -2  -3  251.99   14.03
  -1   1  -4   10.08   10.77
   1  -1   4   11.52    8.87
   1  -1   4   11.33    3.26
  -1   1  -4    5.51    2.77
   1   2   2  936.12   12.58
  -1  -2  -2  939.27   12.90
  -1  -2  -2  952.14   12.36
   1   2   2  969.44   12.49
   3  -2  -1 1914.31   23.23
   3  -2  -1 1878.99   23.39
   1   3   0   21.57    3.95
  -1  -3   0   27.56    3.11
   1   3   0   30.53    6.45
  -1  -3   0   32.58    8.56
   0   2   3 2420.75   28.78
   0   2   3 2465.59   30.38
  -2   2  -3  460.33   23.64
   2  -2   3  474.03   23.78
   2  -2   3  435.09   16.12
  -2   2  -3  445.89   15.46
   1  -2   4 9999.00 3160.25
   2  -1   3  589.41   20.71
  -2   1  -3  590.25   29.97
  -2   1  -3  562.22   19.17
   2  -1   3  630.38   30.69
   2  -3  -2 2406.44   28.93
  -2   3   2 2363.77   31.34
   2  -3  -2 2387.72   30.30
  -2   3   2 2383.58   30.50
  -3   1   2 3789.37   45.81
  -3   1   2 3889.28   47.16
   3  -1  -2 3857.96   46.15
   1  -4   2  386.39   15.07
   1  -4   2  396.89   16.60
  -1   4  -2  407.09   16.24
   1  -4   2  425.34   17.92
   1  -4   0 3953.00   47.69
   1  -4   0 3805.38   47.12
  -1   4   0 4099.15   49.03
  -3   0   1 4515.07 1426.96
   3   0  -1 4403.60 1391.73
  -1  -3   3    3.39    1.36
   1   3  -3    2.44    2.10
  -1  -3   3    2.21    2.33
   1   3  -3    1.85    1.95
  -2   0   4 1140.82   14.92
   2   0  -4 1166.18   14.46
  -2   0   4 1165.39   15.24
   2   0  -4 1151.02   14.38
   2   2   0 2269.14   27.75
  -2  -2   0 2216.74   27.35
   3  -2   1   89.90    7.01
  -3   2  -1   94.45    7.69
  -3   2  -1   48.24   19.00
   0   1   4   -0.16    1.34
   0  -1  -4    1.39    0.97
   0  -1  -4   -1.94    5.04
   0   1   4   -3.20    5.41
   3   0  -2 1220.22   15.33
  -3   0   2 1230.23   16.26
   3   0  -2 1173.69   14.66
  -3   0   2 1162.30   15.28
   0   3  -4   23.41    9.82
   0  -3   4   19.11    3.88
   0  -3   4   13.88    2.24
   0   3  -4   15.21    4.33
   3  -1   1  340.42   12.13
  -3   1  -1  334.08   12.17
   3  -1   1  335.11   27.45
   3  -1   1  323.66  102.64
   0  -4   1 3040.35   37.71
   0  -4   1 3191.10   38.95
   3   0   0  382.79   13.26
  -3   0   0  406.70   14.76
   3   0   0  382.43   14.47
  -3   0   0  380.02   14.51
   0   3   2    5.70    1.61
   0  -3  -2    8.99    2.55
   0   3   2    3.98    3.49
   0  -3  -2    2.83    3.57
   2   2  -3   30.03    3.62
  -2  -2   3   21.93    2.00
  -2  -2   3   20.93    2.62
  -2   4  -1  132.76   11.61
   2  -4   1  139.75   10.02
   2  -4   1  121.59    7.56
   2  -4   1  137.55   11.85
   0   4  -2  295.50   17.03
   0  -4   2  289.91   15.85
   0   4  -2  292.73   16.36
   0  -4   2  303.97   16.08
   2   1  -4  682.05   22.75
  -2  -1   4  679.92   22.85
   2   1  -4  671.34   22.10
   3  -2  -2   34.43    8.27
   3  -2  -2   12.26    8.72
   3  -2  -2   25.07    2.42
  -2   3  -3  133.46   16.11
   2  -3   3  132.66   15.84
   2  -3   3  120.23   10.33
  -2   3  -3  120.54    7.39
  -2   4   0 1183.43   16.63
   2  -1  -4  365.76   12.97
  -2   1   4  359.21   13.12
   2  -1  -4  341.25   11.35
  -1   0  -4  983.03   12.57
  -1   0  -4 1014.25   23.38
   1   0   4 1085.56   24.05
   1   0   4 1055.59   14.83
  -2  -1  -2 1217.74   16.11
   2   1   2 1160.00   16.22
  -2  -1  -2 1167.84   15.25
   2   1   2 1139.31   14.69
   3  -3   0   37.90    5.12
  -3   3   0   33.90    8.44
   3  -3   0   18.70   10.58
  -3   3   0    8.38    6.92
   1  -3   4 1194.87   15.84
  -1   3  -4 1158.09   20.68
  -1   3  -4 1167.57   15.01
   1  -3   4 1160.86   20.59
   0  -4   0   25.70    8.09
   0   4   0   27.47    5.18
   0  -4   0   27.55    5.00
   0   4   0   27.97    6.35
  -1   4  -3  410.10   17.30
   1  -4   3  453.31   15.71
   1  -4   3  427.16   16.13
  -1   4  -3  468.23   17.86
  -1   4   1 4585.36 1449.19
  -1   4   1 4792.93 1514.90
   1  -4  -1 5531.58 1748.26
  -3   3   1   26.70   11.18
   3  -3  -1    9.36    6.28
   2  -4   2  439.20   15.24
  -2   4  -2  443.57   16.38
  -2   4  -2  475.15   19.50
   2  -4   2  433.98   16.60
   2   0   3  104.78   21.46
  -2   0  -3  110.63    8.50
   2   0   3  120.23    7.47
  -1  -3  -1   16.30    4.66
   1   3   1   16.66    3.95
  -1  -3  -1   16.83    5.43
   1   3   1   12.39    2.68
   3  -3   1   93.10   14.84
  -3   3  -1   78.25   15.81
  -3   3  -1   83.91    7.32
   3  -3   1   83.49    7.31
   3  -1  -3  380.24   15.05
  -3   1   3  407.88   13.75
   3  -1  -3  439.59   14.94
   3  -1  -3  400.72   13.46
   0   1  -5  495.83   19.62
   0   1  -5  502.01   17.40
   0  -1   5  472.18   16.51
   0  -1   5  576.53   20.98
   1   1  -5  171.31    9.44
  -1  -1   5  183.81    9.50
  -1  -1   5  198.90   12.84
   1   1  -5  195.80   13.61
  -3   0   3    0.35    1.28
   3   0  -3    0.78    0.91
  -3   0   3    2.21    1.93
   3   0  -3    1.96    1.24
   2  -4  -1  151.14   12.72
  -2   4   1  107.40   11.22
  -2   4   1  151.79    9.64
   2  -4  -1  153.65    8.67
  -2  -2  -1 1309.16   16.68
   2   2   1 1325.60   16.53
  -2  -2  -1 1306.30   17.00
   2   2   1 1307.99   16.62
   1   3  -4  437.54   15.28
  -1  -3   4  442.87   17.67
  -1  -3   4  448.48   15.75
  -1  -3   4  450.22   14.97
  -3   2  -2   28.24   15.92
   3  -2   2   21.42   15.49
   3  -2   2   51.43    4.68
  -3   2  -2   35.14    5.31
   1   0  -5  181.57   11.02
   1   0  -5  168.24    9.01
  -1   0   5  179.81   10.70
  -1   0   5  160.34    8.44
  -1   3   3 8847.37 2796.14
  -1   2   4   10.83    6.14
   1  -2  -4   11.06    3.50
  -1   2   4   22.51    6.43
  -1   2   4   18.64    1.72
  -3  -1   2   11.30    3.19
  -3  -1   2   10.82    4.19
   3   1  -2   10.27    2.53
   3   1  -2   18.63    4.02
  -2   3   3 7257.81 2293.80
  -2   3   3 7047.75 2227.40
  -2  -2   4  119.92    7.14
   2   2  -4  124.91    7.88
   3  -1   2   73.57   23.42
  -3   1  -2   94.28   32.94
  -3   1  -2  117.81    7.83
   3  -1   2  111.77   35.49
   0   0  -5   68.42    7.40
   0   0   5   72.82    5.69
   0   0   5   66.32   10.01
   0   0  -5   78.35   12.53
   3  -2  -3   79.45    5.61
   3  -2  -3   66.44    9.58
  -3   3   2    6.43    4.17
   3  -3  -2   25.94    5.70
   2  -2  -4  847.01   12.59
  -2   2   4  802.84   12.30
  -3   3  -2  177.86   18.48
   3  -3   2  183.92   17.22
  -3   3  -2  152.60    9.68
   3  -3   2  185.51   10.29
   1   2   3  366.06   13.68
   1   2   3  331.07   11.87
  -1  -2  -3  368.67   13.52
  -1  -2  -3  378.69   13.43
  -2   2  -4  105.60    7.55
   2  -2   4  117.08    8.27
   2  -2   4  106.76   20.61
  -2   2  -4   97.55   16.34
   3   1   0   94.19    7.24
  -3  -1   0  104.49    9.94
   3   1   0  110.86   10.35
  -3  -1   0  101.65    8.26
   0   4   1  157.81    9.31
   0  -4  -1  158.18    8.54
   0  -4  -1  173.56   10.02
   0   4   1  166.13    9.33
  -2   4  -3  180.28   14.97
   2  -4   3  183.89   14.52
   2  -4   3  154.57    9.67
  -2   4  -3  152.36    9.68
   3   1  -3   46.30    4.91
  -3  -1   3   41.11    3.64
   3   1  -3   43.92    3.51
  -3  -1   3   44.69    4.01
  -2  -3   2   54.10    5.69
   1   1   4  217.36   20.13
   1   1   4  223.56   12.82
   1   1   4  223.12   11.76
  -1  -1  -4  223.84   12.16
  -1  -4   2   63.96    5.40
   1   4  -2   62.51    5.63
  -1  -4   2   62.00    5.66
   1   4  -2   61.23    6.33
   2  -1   4    5.32   10.67
  -2   1  -4    4.38    8.82
  -2   1  -4    1.48    1.99
   2  -1   4    1.09    1.73
   0  -2  -4  279.12   14.65
   0   2   4  292.91   15.42
   0   2   4  260.93   13.80
   0   2   4  263.23   18.80
  -1   2  -5 3470.43   41.64
   1  -2   5 3348.60   44.76
  -1   2  -5 3377.22   45.56
   1  -2   5 3387.51   40.46
  -3   4   0   66.66   11.44
   3  -4   0   65.60    6.16
   3  -4   0   74.84   10.88
   2   0  -5   13.52    2.26
  -2   0   5    9.71    2.53
  -2   0   5    2.59    2.21
   2   0  -5   11.92    3.27
   1   4  -1  430.19   14.84
  -1  -4   1  422.63   15.38
   1   4  -1  429.53   14.94
  -1  -4   1  435.41   14.86
  -1   4  -4 1140.63   17.68
   1  -4   4 1079.98   13.85
  -1   4  -4 1138.21   17.54
   2  -3   4  895.34   12.38
  -2   3  -4  885.42   13.38
  -2   3  -4  891.19   20.41
   2  -3   4  973.40   21.45
   1  -1  -5  252.10   15.35
  -1   1   5  227.06   12.44
  -1   1   5  255.91   13.50
   1  -1  -5  250.13   12.95
   0   4  -4    4.82    3.38
   0  -4   4    3.62    2.15
   0  -4   4    5.49    4.90
   0  -4   4    2.96    4.16
   0  -3   5  500.07   16.82
   0   3  -5  543.93   19.70
   0  -3   5  525.50   19.02
   0   3  -5  508.69   17.11
   1  -1   5   18.05   10.28
   1  -1   5   24.71    7.85
  -1   1  -5   21.70    5.72
  -1   1  -5   18.12   13.75
  -3   4  -1   31.94   12.45
  -3   4  -1   34.96    6.82
   3  -4   1   31.97    5.04
   3  -4   1   22.00    7.58
  -2   4   2   53.67    5.42
   2  -4  -2   44.83    7.59
   2  -4  -2   62.22    6.54
  -2   4   2   50.28    8.15
   0   3   3  128.99    7.96
   0  -3  -3  132.44    7.94
   0   3   3  144.66    8.59
   0  -3  -3  133.70    8.91
   2   1  -5   98.37    8.46
  -2  -1   5  103.84    8.40
   2   1  -5   94.54    6.33
  -2  -1   5   98.01    8.42
  -2  -3   3 1490.21   21.09
   2   3  -3 1429.66   18.19
  -2  -3   3 1444.98   17.48
  -1  -3  -2   28.57   12.18
   1   3   2   23.03    3.38
  -1  -3  -2   22.14    2.34
   1   3   2   26.03    2.92
   3   0  -4 1308.43   17.95
   3   0  -4 1343.96   16.74
  -3   0   4 1399.95   17.21
   3   0  -4 1328.07   16.32
   2   1   3  510.07   17.27
   2   1   3  519.70   43.15
   2   1   3  508.09   18.16
  -3   1   4  125.09    6.77
   3  -1  -4  109.35    9.40
   3  -1  -4  114.74    7.81
   3  -1  -4  116.85    6.21
   1   4  -3 1592.54   20.19
  -1  -4   3 1640.29   20.71
   3   0   2   94.87   29.35
   3   0   2   76.98    7.28
  -3   0  -2   79.33    7.26
   3   0   2   82.05    6.62
   1  -5   1  288.18   16.55
   1  -5   1  285.69   15.65
  -1   5  -1  295.75   16.97
  -1   5  -1  276.87   15.85
   3  -4  -1    9.99    4.18
   3  -4  -1   20.31    9.36
   3  -4  -1    2.60    3.09
  -3   4   1    6.73    4.19
   1  -5   2   11.21    5.01
  -1   5  -2    6.10    3.29
  -1   5  -2    6.74    5.69
   1  -5   2    8.84    5.09
  -1   3  -5  905.88   18.07
   1  -3   5  960.89   20.70
  -1   3  -5  970.55   12.61
   1  -3   5  955.09   12.24
   2   3   0 1061.38   14.11
   2   3   0 1004.50   13.07
  -2  -3   0 1061.31   14.29
  -2  -3   0 1057.13   15.27
  -2  -2  -2 2309.38   28.68
   2   2   2 2283.06   27.76
   2   2   2 2242.15   27.42
  -2   1   5    2.78    2.47
  -2   1   5    1.76    0.77
   2  -1  -5    0.48    0.61
   2  -1  -5    1.15    1.53
  -3   2  -3  735.98   31.67
   3  -2   3  695.69   24.45
  -3   2  -3  664.68   22.76
   3  -2   3  657.63   34.63
   3   1   1 1362.53   17.12
   3   1   1 1361.97   17.32
  -3  -1  -1 1322.99   18.20
   1   4   0  984.62   12.95
  -1  -4   0  967.79   13.15
   1   4   0  967.85   15.23
  -1  -4   0  984.82   13.60
   0  -1  -5  239.92   12.74
   0   1   5  216.97   16.67
   0   1   5  244.08   12.80
   0  -1  -5  247.33   17.48
   2  -5   1 1472.59   23.19
   2  -5   1 1417.12   18.79
  -2   5  -1 1502.66   21.13
  -3   4  -2   84.80   12.86
   3  -4   2   69.50   12.40
  -3   4  -2   70.38   12.69
   3  -4   2   80.16    6.95
  -1  -3   5 4289.53 1355.65
   1   3  -5 4287.37 1355.04
  -1  -3   5 4227.23   51.98
  -3   3   3  653.38   23.62
   3  -3  -3  661.72   23.29
   3  -3  -3  623.02   20.52
   3  -3  -3  698.11   25.10
  -1   5   0  706.14   24.60
   1  -5   0  661.42   23.40
   1  -5   0  675.02   22.64
  -1   5   0  734.12   25.90
  -3   3  -3   17.53    4.26
   3  -3   3   23.00    4.90
   3  -3   3   16.19   13.46
  -3   3  -3    8.16    8.01
   3   1  -4  228.37   11.60
  -3  -1   4  209.60   11.30
  -3  -1   4  194.14   11.42
   3   1  -4  212.19   11.24
   2   0   4 2389.73   42.10
  -2   0  -4 2214.38   27.39
   2   0   4 2253.52   27.29
  -2   0  -4 2414.93   38.92
   2  -5   0  257.09   13.63
  -2   5   0  257.75   15.82
   2  -5   0  278.44   17.63
  -2   5   0  273.59   15.31
   1   0   5  340.21   20.25
   1   0   5  324.68  102.75
  -1   0  -5  327.77  103.68
  -1   0  -5  327.78  104.62
   2  -5   2  269.46   14.94
   2  -5   2  284.13   18.40
   2  -5   2  241.77   13.22
  -2   5  -2  288.76   17.33
   3   2  -2  571.39   19.38
  -3  -2   2  554.52   18.80
   3   2  -2  568.97   19.17
  -3  -2   2  566.05   19.68
  -2  -2   5 1696.19   21.25
   2   2  -5 1708.35   21.24
   4  -2  -1 1241.93   25.46
   4  -2  -1 1156.12   14.62
   4  -2  -1 1184.71   15.09
  -4   2   1 1185.01   15.71
  -3   1  -3   49.71   11.37
   3  -1   3   45.99    6.07
  -3   1  -3   66.58   28.70
   3  -1   3   27.10   13.78
   3  -2  -4  426.59   15.75
   3  -2  -4  394.01   13.17
  -3   2   4  391.08   13.11
  -3   2   4  419.78   16.65
  -1   5  -3    7.36    3.19
   1  -5   3    5.78    3.91
   1  -5   3   10.35    4.35
   1  -5   3   10.66    4.35
   4  -1  -1   70.71    6.33
  -4   1   1   69.53    6.21
  -4   1   1   71.14    7.58
   4  -1  -1   76.27    5.87
   0  -4  -2  121.53    8.46
   0   4   2  114.20    7.35
   0  -4  -2  106.93    7.90
   0   4   2  107.58    8.46
   2   3  -4  360.05   12.65
  -2  -3   4  343.33   13.31
  -2  -3   4  371.44   12.57
   4  -2   0  698.74   23.40
  -4   2   0  722.88   24.34
   4  -2   0  699.82   29.47
   4  -2   0  692.07   23.40
  -2   4  -4    7.65    6.51
   2  -4   4   -2.39    5.55
   2  -4   4    5.52    2.86
  -2   4  -4    2.90    1.76
   0  -5   2    3.98    2.94
   0   5  -2   14.41    4.75
   0  -5   2    7.71    2.59
   0   5  -2   14.21    3.94
  -1  -4   4   27.54    4.41
   1   4  -4   38.34    4.61
  -1  -4   4   32.91    4.84
   1   4  -4   33.05    4.59
   0  -5   1 1350.36   18.38
   0   5  -1 1399.26   18.66
   0  -5   1 1399.47   19.24
   0   5  -1 1384.49   19.25
   1  -3  -4  324.67  102.79
  -1   3   4  314.37   16.77
  -1   3   4  305.48   15.85
  -3   4   2 1087.75   17.48
  -3   4   2 1082.41   18.32
  -2   3   4  278.16   15.91
   2  -3  -4  280.39   15.15
  -4   1   2  676.98   22.77
   4  -1  -2  662.14   22.45
  -4   1   2  674.37   23.09
   4  -1  -2  675.42   22.80
   3   2  -3 1087.86   14.90
   3   2  -3 1059.63   13.15
  -3  -2   3 1055.18   14.39
  -3  -2   3 1064.51   13.69
  -4   1   0  159.33    9.08
   4  -1   0  162.64    8.98
   4  -1   0  152.52   10.78
   4  -1   0  139.12   43.41
  -1  -1   6  498.71   16.59
  -1  -1   6  502.47   17.45
   1   1  -6  527.90   17.99
   1   1  -6  499.42   17.79
  -4   2   2  191.95   11.59
   4  -2  -2  189.79   10.38
   4  -2  -2  178.66    9.34
   4  -2  -2  149.72   16.65
   0  -1   6    9.05    5.09
   0   1  -6   19.06    2.82
   0   1  -6    9.39    6.40
   0  -1   6   18.90    2.04
   4  -3   0   76.30   17.73
  -4   3   0   53.76   18.15
  -4   3   0   40.05    5.91
   4  -3   0   34.95    6.97
   0   5  -3  568.49   19.51
   0  -5   3  551.82   20.61
   0  -5   3  620.34   21.63
   0   5  -3  604.22   21.31
   0   2  -6 2881.34   34.99
   0   2  -6 3056.22   39.08
   0  -2   6 2796.14   45.33
   0  -2   6 2978.31   35.68
  -1   2   5 1047.19   13.81
   1  -2  -5 1050.23   14.04
   0   4  -5  718.03   24.59
   0   4  -5  699.03   24.14
   0  -4   5  692.48   26.98
   0  -4   5  721.17   24.01
  -4   3   1   18.39   12.52
   4  -3  -1   26.88    8.97
   4  -3  -1   39.17    7.55
  -4   3   1   45.34   11.42
   2   3   1   95.77    8.96
  -2  -3  -1   86.87    6.89
   2   3   1   92.85    6.74
  -2  -3  -1   95.62    7.28
  -3  -2   0  718.22   24.56
   3   2   0  727.01   24.28
  -3  -2   0  714.55   24.54
   2  -5  -1  119.15    7.14
  -2   5   1  127.46    8.02
  -2   5   1  121.88   10.00
   2  -5  -1  106.26   12.37
  -2   5  -3  643.58   23.06
   2  -5   3  688.06   24.61
   2  -5   3  645.21   23.24
  -2   5  -3  633.39   23.40
  -2   4   3    7.64    2.21
   2  -4  -3    7.86    5.35
  -2   4   3    7.10    3.84
   2  -4  -3   15.35    2.61
   1   4   1   34.25    6.91
  -1  -4  -1   36.09    6.79
   1   4   1   29.33   10.03
  -1  -4  -1   28.14    9.59
   4  -2   1    7.22   12.56
   4  -2   1    8.03    3.12
  -4   2  -1    4.48    4.13
   1  -5  -1  112.80    9.04
  -1   5   1  104.87    9.37
   1  -5  -1  111.68    8.21
  -1   5   1  104.08    7.74
   1   2  -6 2387.73   30.09
  -1  -2   6 2335.57   29.59
  -1  -2   6 2456.10   29.19
   1   0  -6  127.52    8.02
  -1   0   6  123.21    7.85
  -1   0   6  133.24   10.00
   1   0  -6  128.33   10.11
  -1   4  -5   14.65    4.72
   1  -4   5   16.88    6.35
   1  -4   5    7.25    5.03
  -1   4  -5    9.51    2.75
  -1   4   3 2586.92   30.94
   1  -4  -3 2733.37   32.58
   1  -4  -3 2565.61   32.36
   2  -2  -5  124.89    8.92
   2  -2  -5  103.51    7.89
  -2   2   5  106.88    8.96
   3  -4   3  134.54    7.66
  -3   4  -3  132.41    8.86
  -3   4  -3  106.55   13.00
   3  -4   3  108.42   16.42
   0  -5   0  109.01   10.46
   0  -5   0  105.58    8.89
   0   5   0  106.27    8.28
   0   5   0  102.34    8.55
   1   2   4  549.54   34.95
   1   2   4  569.27   19.10
  -1  -2  -4  546.11   18.76
  -4   0   1  199.73   10.95
  -4   0   1  217.99   12.19
   4   0  -1  207.25   11.07
   4   0  -1  213.10   11.32
   2  -2   5  121.31   16.14
   2  -2   5  134.96    7.88
  -2   2  -5  149.94   11.54
  -2   2  -5  152.66   21.30
   4   0  -2  679.01   22.55
   4   0  -2  696.79   23.72
  -4   0   2  675.66   22.95
  -4   0   2  672.48   22.51
   3   0  -5  411.72   13.95
   3   0  -5  384.12   13.62
  -3   0   5  378.41   12.72
   3   0  -5  388.54   13.08
   4  -3   1  358.46   25.34
   4  -3   1  379.35   13.44
  -4   3  -1  354.11   13.15
  -4   3  -1  346.05   22.65
   3   1   2   50.73    6.10
  -3  -1  -2   43.02    7.62
   3   1   2   44.36    4.27
  -3  -1  -2   49.26    5.92
  -4   1   3  200.76   11.95
   4  -1  -3  203.15   10.78
  -4   1   3  206.30   10.83
   3  -5   1   67.61   15.88
  -3   5  -1   49.66   12.03
   3  -5   1   44.59    7.12
   2  -3   5 1062.37   13.78
  -2   3  -5 1086.89   21.75
  -2   3  -5 1061.57   14.01
   1  -5   4   40.53    4.06
   1  -5   4   53.78   12.62
   3  -5   0  161.41   12.97
  -3   5   0  151.25   13.14
   3  -5   0  150.53   11.17
   3  -5   0  108.44   13.00
   4  -1   1   33.78    3.73
  -4   1  -1   37.72   10.53
   4  -1   1    6.15   12.62
   4  -1   1   37.20    5.37
  -3   0  -3  144.43   11.54
   3   0   3  141.38    8.11
   3   0   3  128.40    9.23
   3   0   3  133.41   26.72
   1   3   3    1.24    1.48
   1   3   3    1.99    2.61
  -1  -3  -3    3.67    1.46
  -1  -3  -3    6.39    3.77
   4  -3  -2  244.99   21.63
   4  -3  -2  232.87   12.74
   4  -3  -2  233.49   12.31
   3  -1  -5  239.74   13.32
   3  -1  -5  249.59   12.69
  -3   1   5  226.83   12.03
  -3   1   5  224.87   13.11
  -3  -2   4  445.93   14.83
   3   2  -4  439.64   14.54
  -3  -2   4  423.78   14.64
   3   2  -4  457.08   15.66
   0   0   6   13.72    4.65
   0   0  -6    5.41    4.69
   0   0  -6   18.62    2.36
   0   0   6   17.23    2.56
   0   3  -6 3105.60   40.69
   0   3  -6 3238.55   39.97
   0  -3   6 3051.70   36.38
   0  -3   6 3099.15   39.07
   4  -2  -3  449.51   15.03
  -4   2   3  430.15   14.71
  -4   0   0  930.59   15.45
  -4   0   0  912.67   13.93
   4   0   0  940.89   12.59
  -2   1  -5   64.93    7.60
  -2   1  -5   56.76   15.99
   2  -1   5   60.31   15.95
   2  -1   5   64.55    5.33
   0  -3  -4  884.65   12.14
  -2  -1   6 2045.41   26.62
   2   0  -6  370.22   12.62
   2   0  -6  394.80   13.66
  -2   0   6  359.22   13.10
  -2   0   6  384.07   13.17
   1   1   5   51.95   14.56
   1   1   5   66.93    6.92
  -1  -1  -5   66.95   11.35
   3   1  -5  513.58   17.39
  -3  -1   5  470.86   15.92
   3   1  -5  504.60   16.64
   0  -5   4 1266.18   16.49
   0  -5   4 1257.20   17.10
   0  -5   4 1313.21   18.71
  -4   0   3  745.59   25.31
   4   0  -3  753.60   25.11
   4   0  -3  783.63   10.22
  -4   0   3  785.97   10.70
   2   2   3   25.46    6.09
   2   2   3   25.57    7.69
  -2  -2  -3   18.30    3.74
  -2  -2  -3   31.38    7.93
   3  -3  -4   14.52    0.65
  -3   3   4    8.66    5.04
   3  -3  -4   16.86    4.79
  -3   5  -2   55.28    7.48
   3  -5   2   58.97    5.64
   3  -5   2   56.84    9.70
  -3   5  -2   70.47   12.74
  -2  -3   5   34.87    6.39
   2   3  -5   32.97    6.61
  -3   2  -4   49.03    5.95
   3  -2   4   50.16    4.65
  -3   2  -4    9.41   10.16
   3  -2   4   11.47   10.86
  -1   2  -6 1413.71   19.09
   1  -2   6 1423.04   23.15
  -1   2  -6 1475.11   25.79
   1  -2   6 1369.85   17.04
   0  -2  -5 1824.90   23.67
   2   4  -2  800.09   11.15
  -2  -4   2  782.06   11.92
  -2  -4   2  792.07   10.75
  -2  -1  -4  415.85   17.34
   2   1   4  404.14   14.43
   2   1   4  381.00   26.96
  -1  -4   5  148.46    8.18
  -1  -4   5  173.42    9.63
  -1  -4   5  157.03    9.26
   1   4  -5  162.97   10.29
  -3   3  -4   12.14    8.55
   3  -3   4   11.14   10.27
   3  -3   4   29.40   11.50
  -3   3  -4   37.33   14.15
   4  -4   0    8.37    3.07
  -4   4   0    4.93    4.02
  -4   4   0    3.49    8.77
   4  -4   0   -0.38    5.15
   3  -4  -3    0.75    1.45
  -3   4   3    1.03    3.86
  -3   4   3   -1.27    3.13
   3  -4  -3    3.87    5.31
   3  -5  -1   15.70    4.48
   3  -5  -1   24.87    9.92
  -3   5   1   12.13    5.49
  -3   5   1   28.75   11.18
  -3  -2  -1  492.02   18.28
   3   2   1  483.19   16.89
   3   2   1  498.41   17.13
  -3  -2  -1  478.53   17.59
   1   3  -6    2.15    1.14
  -1  -3   6   -0.85    2.65
  -1  -3   6    2.03    1.17
   1   3  -6    2.70    1.97
  -2  -4   3  337.02   11.90
   2   4  -3  357.68   12.22
   2   4  -3  354.10   14.32
   1  -1  -6  805.96   12.28
  -1   1   6  778.41   10.94
  -1   1   6  851.58   12.56
   1  -1  -6  835.95   15.61
   2   4  -1 1722.32   21.67
  -2  -4   1 1791.06   23.51
  -2  -4   1 1733.32   22.78
  -4   2  -2  255.96   26.32
   4  -2   2  225.25   30.57
   4  -2   2  261.22   14.33
  -4   2  -2  237.91   13.34
  -1   1  -6  246.46   13.16
  -1   1  -6  219.91   18.50
   1  -1   6  246.81   18.78
   1  -1   6  251.72   13.24
  -2   5   2 2651.68   34.57
   2  -5  -2 2658.13   34.89
  -2   5   2 2672.31   32.41
   2  -5  -2 2579.96   31.25
  -4   4   1    3.45    6.06
   4  -4  -1    4.06    6.96
   4  -4  -1   -1.62    1.96
  -2   5  -4  567.57   19.87
   2  -5   4  611.16   22.03
   2  -5   4  632.08   24.34
   1  -3   6 3246.62   39.07
   1  -3   6 3319.51   42.73
  -1   3  -6 3310.26   43.76
  -4   3  -2   96.28   16.09
   4  -3   2  139.91   10.26
  -4   3  -2  131.44    8.48
   4  -3   2  127.34   24.47
   0  -5  -1  310.13   15.95
   0   5   1  340.97   14.03
   0  -5  -1  328.93  104.13
   0   5   1  341.77   13.00
  -4   4  -1  455.19   17.94
   4  -4   1  455.26   22.46
  -4   4  -1  470.46   23.17
   4  -4   1  449.56   15.59
  -1  -5   2   64.05    8.78
   1   5  -2   54.16    5.09
  -1  -5   2   59.79    5.38
   1   5  -2   58.88    7.47
   0   4   3  192.35    9.98
   0  -4  -3  179.42    9.61
   0   4   3  189.55   10.63
   0  -4  -3  181.32   10.57
  -2  -2   6    3.38    1.88
   2   2  -6    9.52    2.84
  -2   4  -5  304.26   16.03
   2  -4   5  323.65  103.15
  -2   4  -5  317.60  101.27
   2  -4   5  317.89  100.57
  -3   2   5    1.39    3.40
   3  -2  -5    0.70    0.30
   3  -2  -5    1.20    2.08
   2  -1  -6  100.84    7.71
   2  -1  -6  111.54    7.69
  -2   1   6  114.81    6.32
  -2   1   6  113.47    7.23
   3  -1   4 1748.80   37.15
   3  -1   4 1737.40   22.28
  -3   1  -4 1734.43   22.12
   1  -5  -2    6.48    4.52
  -1   5   2   14.20    3.56
   1  -5  -2   21.18    4.83
  -1   5   2    8.57    4.27
  -4  -1   2  134.66    8.69
   4   1  -2  132.72    7.98
  -4  -1   2  146.53    9.05
   4   1  -2  148.05    8.57
   1   5  -3   -0.23    1.78
  -1  -5   3    0.44    2.19
   1   5  -3   -0.40    1.93
  -1  -5   3    1.14    1.75
   4  -3  -3 2499.73   29.78
  -2  -3  -2  101.45    7.92
   2   3   2  116.12    9.05
  -2  -3  -2  108.96    8.33
   2   3   2  102.84    7.48
  -4   1   4  129.82    7.19
   4  -1  -4  126.02    9.61
   4  -1  -4  122.18    6.82
   4  -1  -4  132.92    7.39
   4   0   1   10.73    2.63
   4   0   1   10.51    2.69
  -4   0  -1   15.96    5.45
  -4   0  -1   13.66    3.68
   1   5  -1    1.63    1.99
  -1  -5   1    2.74    1.92
  -1  -5   1    3.83    2.78
   1   5  -1    4.31    2.88
  -3  -3   2  761.69   25.88
   3   3  -2  718.27   23.83
  -3  -3   2  688.20   22.83
   1   4   2  511.44   17.51
  -1  -4  -2  492.02   16.63
   1   4   2  515.92   17.53
  -1  -4  -2  518.93   17.91
  -4  -1   1  540.61   18.43
   4   1  -1  531.45   17.98
  -4  -1   1  507.99   19.60
   4   1  -1  537.02   20.05
  -3   4  -4   42.26   12.28
   3  -4   4   60.49   16.64
   3  -4   4   58.35    4.94
  -3   4  -4   59.74    6.41
  -3   5  -3  324.35  102.82
  -3   5  -3  318.30  101.56
   3  -5   3  332.05   16.86
   3  -5   3  313.17   16.28
   4  -1   2  893.76   31.40
   4  -1   2  866.63   14.54
   4  -1   2  879.50   11.63
  -4   1  -2  885.44   12.59
   2   0   5   -0.72    8.84
  -2   0  -5    2.47    1.25
   2   0   5    2.14    2.21
  -2   0  -5    4.01    7.69
  -2  -4   4  373.65   12.80
  -2  -4   4  362.65   13.58
   2   4  -4  375.26   12.91
   2   4  -4  374.41   13.08
   3   3  -3  174.41    9.54
  -3  -3   3  177.90   11.59
  -3  -3   3  175.17    9.22
   3   3  -3  171.38    8.93
   4   0  -4  114.61    6.26
  -4   0   4  118.98    9.49
   4   0  -4  119.63    6.48
  -4   0   4  124.37    7.73
   3   3  -1 1438.41   18.54
  -3  -3   1 1380.71   19.34
   3   3  -1 1439.63   18.48
   0   1   6  742.07   24.77
   0   1   6  808.73   17.84
   0  -1  -6  755.06   29.38
   0  -1  -6  757.82   26.12
   3   2  -5   16.25    4.99
  -3  -2   5   15.25    4.64
   3   2  -5   16.35    1.65
  -2  -4   0   13.92    3.40
   2   4   0   14.85    2.95
  -2  -4   0   12.50    3.04
   2   4   0   17.41    3.59
   4   1  -3  770.98   11.43
  -4  -1   3  781.65   10.65
   4   1  -3  768.86  243.02
  -4  -1   3  760.31   25.67
  -1   6  -2    0.47    1.04
   1  -6   2    1.77    1.37
  -1   6  -2    4.72    3.42
   1  -6   2   -0.73    3.35
  -4   4   2   84.33   12.25
   4  -4  -2   96.67   13.17
   4  -4  -2  100.13    8.81
   4  -4  -2   76.21   13.53
  -2   6  -1  810.68   12.66
   2  -6   1  872.38   15.27
  -2   6  -1  882.84   15.71
   2  -6   1  829.37   14.31
   4  -2  -4  174.69   10.72
   4  -2  -4  177.09   11.56
   4  -2  -4  209.64   15.58
  -4   2   4  178.51   11.54
   0   4  -6  481.80   17.64
   0  -4   6  463.02   20.53
   0  -4   6  452.57   15.55
  -1   6  -1  546.08    6.15
   1  -6   1  580.78   12.59
   1  -6   1  579.38   10.51
  -1   6  -1  541.53    8.35
  -1   5  -5  688.26   12.46
   1  -5   5  690.11   11.56
  -1   5  -5  710.97   14.04
   2  -3  -5  300.96   11.59
  -2   3   5  309.72   12.26
  -4   4  -2  112.93    8.74
   4  -4   2  107.61    3.78
  -4   4  -2   98.77   14.50
   4  -4   2  101.05   17.45
  -2   6  -2  179.60   13.29
   2  -6   2  182.14   14.35
   2  -6   2  174.10   15.21
   2  -6   2  200.13   13.08
   2  -4  -4   41.54    6.68
  -2   4   4   37.15    6.00
   2  -4  -4   33.07    2.08
  -2   4   4   36.15    3.13
  -3   5   2  752.58   15.89
   1   0   6  125.14   16.95
   1   0   6  144.42    9.29
  -1   0  -6  123.87    8.29
  -1   0  -6  180.10   19.90
   1  -3  -5  159.57   10.89
  -1   3   5  162.87   10.00
  -1   3   5  174.64   11.73
  -1   3   5  185.39   15.56
   0   5  -5  415.00   15.23
   0  -5   5  421.88   16.76
   0  -5   5  433.41   17.32
   0  -5   5  441.40   15.51
   4   1   0   42.03    3.54
   4   1   0   43.08    3.74
  -4  -1   0   47.44    7.75
  -4  -1   0   55.75    9.39
   1   5  -4  550.75    5.54
  -1  -5   4  566.51   13.89
   1   5  -4  570.77   10.88
  -1  -5   4  590.24   13.70
  -3  -1  -3  736.37   14.06
   3   1   3  779.98   30.40
   3   1   3  743.55   12.37
   3   1   3  761.95   12.64
   1  -4   6  295.76   10.94
  -1   4  -6  290.60   12.24
  -1   4  -6  286.20   13.50
   1  -4   6  290.47   13.59
   1  -6   3  221.95   16.15
   1  -6   3  218.54   15.35
  -1   6  -3  202.28   14.45
   1   5   0   45.64    6.63
  -1  -5   0   43.89    4.09
   1   5   0   43.10    4.74
  -1  -5   0   50.97    9.05
   1  -4  -4  465.35   16.62
  -1   4   4  466.38   16.28
   1  -4  -4  474.09   16.10
  -1   4   4  480.34   17.14
  -2   6   0 1076.29   18.26
   2  -6   0 1056.35   18.51
   2  -6   0 1036.95   19.24
   3   0  -6  336.81   11.90
  -3   0   6  346.47   12.90
   3   0  -6  333.54   11.51
  -3   0   6  330.06   11.99
   3   3  -4   10.52    3.77
  -3  -3   4    3.45    2.74
   3   3  -4    7.69    3.39
   1  -6   0 1421.53   25.43
  -1   6   0 1312.95   22.38
   1  -6   0 1345.90   21.40
  -1   6   0 1333.60   21.79
   1   1  -7  137.42   10.36
   1   1  -7  171.14   10.85
  -1  -1   7  167.15   10.60
  -1  -1   7  164.10   12.66
   2  -6   3   60.07    9.87
   2  -6   3   66.68   10.29
  -2   6  -3   49.68    6.29
   2  -6   3   79.42    7.05
  -3  -3   0  335.61   12.34
  -3  -3   0  324.43   12.42
   3   3   0  323.64   13.93
   3   3   0  334.59   12.19
  -3  -2  -2 2569.88   42.16
   3   2   2 2632.56   40.88
  -4   3  -3    4.33    8.29
   4  -3   3    1.80   11.74
   4  -3   3    2.18    1.77
  -4   3  -3    1.02    2.31
   2   3  -6  523.90   18.27
  -2  -3   6  525.82   18.59
  -3   0  -4  769.80   14.69
   3   0   4  738.65   25.66
   3   0   4  716.17   11.86
   3   0   4  779.53   13.12
   4  -2   3  297.64   26.69
  -4   2  -3  303.78   12.57
   4  -2   3  307.66   11.14
  -1  -2   7  297.02   15.32
  -1  -2   7  301.25   10.57
   1   2  -7  304.89   10.76
   1   2  -7  311.40   12.25
   0  -2   7  373.93   13.85
   0   2  -7  391.85   13.85
   0  -2   7  403.62   18.82
   0   2  -7  384.18   17.68
  -3  -1   6  151.84   10.48
   3   1  -6  136.40    8.41
   3   1  -6  135.41    8.41
   3   1  -6  144.39    9.25
  -1  -4   6  194.70   12.89
  -1  -4   6  187.46   14.65
   1   4  -6  173.64   11.55
   4  -5   0   19.38    8.71
  -4   5   0   13.00   10.58
   4  -5   0    1.60    4.34
   1  -2  -6  139.08    9.24
  -1   2   6  109.73    7.89
  -1   2   6  126.52    9.65
   2  -2  -6  224.31   14.72
  -2   2   6  224.79   14.29
  -2   2   6  227.18   15.28
   2  -2  -6  210.91   13.33
   0   5   2  213.84   13.26
   0  -5  -2  209.34   13.13
   0   5   2  203.85   13.50
   0  -5  -2  224.68   14.71
   3  -1  -6  295.18   10.93
   3  -1  -6  307.45   10.54
  -3   1   6  297.93   14.68
  -3   1   6  290.35   10.05
  -1  -3  -4 1057.72   16.85
   1   3   4 1012.13   16.20
  -1  -3  -4 1007.85   18.40
   1   3   4  962.60   15.39
   4  -5   1  132.23    8.83
  -4   5  -1  148.08   18.11
   4  -5   1  121.06   14.14
  -4   5  -1  106.16    5.83
   3  -4  -4  688.15   13.73
  -3   4   4  709.95   13.71
   0  -6   2  449.37   16.87
   0   6  -2  458.50   17.61
   0  -6   2  441.75   15.77
   0   6  -2  456.69   16.82
   1   2   5  269.75   21.64
   1   2   5  244.01   15.90
  -1  -2  -5  245.83   15.60
   1   2   5  230.29   14.66
   0  -1   7  280.06   13.44
   0   1  -7  255.09    5.77
   0  -1   7  246.33   15.16
   0   1  -7  270.78   14.81
  -2   2  -6   10.28    4.96
   2  -2   6    9.83    3.79
   2  -2   6   11.98   10.54
  -2   2  -6    1.84    7.01
   2  -5  -3   42.33    5.92
  -2   5   3   39.75    6.93
   2  -5  -3   49.07    3.53
  -2   5   3   49.08    6.72
   2  -5   5 1161.60   23.12
  -2   5  -5 1190.17   19.31
   2  -5   5 1197.14   19.11
   4   0   2   20.35   16.23
   4   0   2   50.93    7.21
  -4   0  -2   57.09    4.70
   4   0   2   57.17    4.34
  -2   3  -6   -3.03    6.94
   2  -3   6    5.60    5.83
   2  -3   6    2.92    2.25
  -2   3  -6    0.35    1.26
   3  -3  -5   89.64    7.16
  -3   3   5   73.23    7.30
   2   4  -5 1626.41   25.74
   3  -6   1   44.69   10.97
   3  -6   1   36.49    6.68
   3  -6   1   33.13    7.88
  -3   6  -1   40.35    8.41
   4  -3  -4   95.84    9.83
   4  -3  -4  115.81    9.05
   4  -3  -4  115.66   10.80
   4  -3  -4  115.36    7.14
  -1   0   7   28.90    5.12
  -1   0   7   27.99    3.04
   1   0  -7   31.72    2.80
   1   0  -7   12.81    9.59
   3  -5   4    1.85    5.88
   3  -5   4   -0.17    0.68
  -3   5  -4    1.82    2.08
  -3   5  -4   -0.55    5.82
   0   6  -3  105.98    9.10
   0  -6   3  107.99    7.72
   0   6  -3  103.92    8.46
   0  -6   3  104.57    8.22
   3  -3   5  176.33   11.82
   3  -3   5  204.95   19.88
  -3   3  -5  174.30   11.79
  -3   3  -5  224.77   21.63
   2   4   1  366.21   13.03
  -2  -4  -1  353.38   13.61
   2   4   1  364.83   12.92
  -2  -4  -1  370.74   13.11
   4  -4  -3  249.65   16.29
   4  -4  -3  229.29   16.59
   4  -4  -3  260.18    9.45
   0  -6   1   80.75    6.73
   0   6  -1   77.19    6.18
   0  -6   1   92.45    8.61
   0   6  -1   82.62    5.50
  -4   5   1  416.47   20.28
   4  -5  -1  453.71   21.06
   4  -5  -1  435.69   18.80
   4  -5  -1  469.32   16.48
   2   2   4  273.68   11.02
  -2  -2  -4  281.45   10.92
   2   2   4  266.99   10.27
  -1   6  -4 1015.43   17.90
   1  -6   4 1004.54   18.11
   1  -6   4 1026.26   20.39
   1  -6   4 1023.43   17.21
  -3   2  -5  905.06   25.42
   3  -2   5  854.03   25.64
   3  -2   5  819.44   13.27
  -3   2  -5  763.10   17.16
   3  -6   0  199.61   14.83
   3  -6   0  193.61   15.71
  -3   6   0  228.01   18.44
   4  -1  -5   36.90    3.07
  -4   1   5   36.48    3.03
   4  -1  -5   34.74    5.82
   4  -1  -5   33.19    4.16
   2  -6  -1 2887.82   45.47
  -2   6   1 2919.46   44.77
  -2   6   1 2926.96   46.27
   2  -6  -1 2896.39   45.93
   3  -6   2   76.94    6.10
   3  -6   2   71.33   11.29
   3  -6   2   61.84    7.70
  -3   6  -2   62.47   10.57
   4  -4   3  146.25   18.98
   4  -4   3  160.32   11.62
  -4   4  -3  154.69   19.32
  -4   4  -3  156.87   10.99
   0   3  -7  289.33   13.21
   0  -3   7  241.88   15.06
   0   3  -7  233.42   15.75
   0  -3   7  248.11   17.43
  -4  -1  -1   97.99    7.37
   4   1   1  110.43    6.46
  -4  -1  -1   92.64   12.93
   4   1   1   87.71    5.84
   4   0  -5    4.19    2.90
   4   0  -5   14.64    5.62
   4   0  -5   14.66    5.64
  -4   0   5   11.96    4.46
   1  -5  -3   62.37    8.51
  -1   5   3   50.96   11.13
  -1   5   3   57.06    3.99
   1  -5  -3   58.12    4.01
   2   1  -7  146.76    9.21
  -2  -1   7  134.38    9.62
  -2  -1   7  141.18    8.96
   2   1  -7  135.68    9.90
   0   3   5   35.98    4.53
   0   3   5   39.00    3.18
   0  -3  -5   41.61    9.23
  -1  -5   5   16.60    6.23
  -1  -5   5   16.27    6.23
  -1  -5   5   18.01    8.33
   1   5  -5    8.72    3.79
   4   2  -2 1352.48   21.15
  -4  -2   2 1361.65   21.73
  -4  -2   2 1358.60   22.45
   4   2  -2 1376.04   21.86
   4  -1   3 1225.03   19.32
  -4   1  -3 1225.64   19.95
   4  -1   3 1245.67   36.91
   4  -1   3 1236.35   19.94
   4  -5   2  912.87   14.98
  -4   5  -2  936.55   22.94
   4  -5   2  958.13   22.28
  -4   5  -2  949.22   17.42
  -2   1  -6   17.22   13.62
   2  -1   6   27.33   12.07
   2  -1   6   28.06    4.53
  -2   1  -6   32.04    3.67
   2   0  -7    9.07    4.01
  -2   0   7    7.59    3.23
  -2   0   7   10.35    4.30
   2   0  -7    3.16    2.58
   1   5   1   31.97    3.57
   1   5   1   29.35    5.15
  -1  -5  -1   28.47    3.40
  -1  -5  -1   31.24    4.33
   5  -2  -1  184.44   12.20
  -5   2   1  193.50   13.04
   5  -2  -1  194.03   12.60
   5  -2  -1  146.07   20.09
   2   1   5  530.23   25.59
   2   1   5  538.62    4.89
   2   1   5  552.88    5.86
   1   3  -7 2523.36   39.43
  -1  -3   7 2571.85   38.95
  -1  -3   7 2453.41   38.42
  -2  -3  -3  488.92   17.18
   2   3   3  512.45   17.76
  -2  -3  -3  482.08   18.52
   2   3   3  484.93   17.73
  -3   5   3  777.82   15.86
   3  -5  -3  790.82   12.32
  -3   5   3  838.16   16.02
   3  -5  -3  767.29   14.95
  -1   6   1    9.23    5.43
  -1   6   1   12.99    5.47
   1  -6  -1   16.19    6.08
   1  -6  -1   10.64    5.13
  -2   6  -4   64.19    8.49
   2  -6   4   70.63    8.28
   2  -6   4   61.27    7.83
  -1  -4  -3    1.62    2.62
   1   4   3    4.62    3.76
  -1  -4  -3    3.58    2.23
   1   4   3    3.74    2.15
   4   2  -3 1122.36   17.41
   4   2  -3 1146.92   18.39
  -4  -2   3 1117.82   17.83
  -4  -2   3 1113.07   20.79
  -3  -3   5   20.52    7.06
  -3  -3   5   16.12    5.73
   3   3  -5   19.80    8.29
   0  -4  -4  350.92   13.16
   0   4   4  352.28   12.83
   0  -4  -4  341.08   12.08
   0   4   4  356.44   12.96
   0   0   7   -0.29    3.55
   0   0  -7   -1.09    5.16
   0   0   7    0.25    1.41
   0   0  -7    1.94    2.22
  -2   4  -6 1599.12   29.72
   2  -4   6 1600.09   24.90
   2  -4   6 1621.69   29.87
   3  -4   5  754.22   13.19
  -3   4  -5  715.91   20.48
  -3   4  -5  732.28   15.80
   3  -4   5  745.68   20.46
   3   2  -6  380.14   13.40
  -3  -2   6  385.85   14.90
  -4  -2   1  176.63   11.99
  -4  -2   1  174.25   12.53
   4   2  -1  181.92   11.55
   4   2  -1  176.73   11.23
  -1  -1  -6  124.43    9.56
  -1  -1  -6  138.12   27.87
   1   1   6  110.94   18.53
   1   1   6  118.42    7.88
   5  -2  -2   10.43    4.33
   5  -2  -2    8.00    3.65
   5  -2  -2    0.47    5.04
  -5   2   2    2.95    3.31
  -4   2   5  641.36   10.35
   4  -2  -5  643.95   13.15
   4  -2  -5  668.36   11.83
   4  -2  -5  657.68   10.36
   5  -2   0  505.89   17.53
  -5   2   0  482.74   16.99
   5  -2   0  493.86   17.53
   5  -2   0  566.09   29.62
  -5   3   1  255.12    5.64
   5  -3  -1  250.21   26.14
   5  -3  -1  255.53    6.18
   5  -3  -1  247.77   15.45
   0  -6   4  264.77   11.91
   0  -6   4  275.31   11.82
   0   6  -4  278.98   10.91
  -2  -2   7  783.68   13.51
   2   2  -7  775.50   11.93
  -2  -2   7  772.21   12.11
   2   2  -7  786.70   13.28
   3   3   1   69.22    6.93
  -3  -3  -1   64.71    7.82
  -3  -3  -1   60.03    5.18
   3   3   1   64.77    4.59
  -1   2  -7   55.38    4.46
   1  -2   7   61.41    4.28
  -1   2  -7   43.36   10.70
   1  -2   7   49.91    9.31
   0  -2  -6    1.52    2.30
   0   2   6    2.54    2.62
   0   2   6    5.00    5.42
   0  -6   0  108.19    7.35
   0   6   0  101.75    7.58
   0   6   0  104.33    6.74
   0  -6   0  106.50    3.71
   3  -2  -6  394.39   13.34
  -3   2   6  383.84   13.00
  -3   2   6  398.85   15.01
   3  -2  -6  399.79   14.28
   5  -3   0   -2.35    9.86
   5  -3   0    7.86    3.52
   5  -3   0   12.97    5.31
  -5   3   0    6.29    3.41
  -5   1   1  111.73    7.49
   5  -1  -1  111.12    7.32
  -5   1   1  115.98   10.45
   5  -1  -1  112.04    8.01
  -3   6   1 2244.40   36.28
   3  -6  -1 2171.10   36.83
  -3   6   1 2155.37   35.61
   3  -6  -1 2043.11   33.24
  -3   1  -5  314.13   20.72
   3  -1   5  300.91   10.74
  -3   1  -5  291.22   11.46
   3  -1   5  326.00   24.72
   3  -6   3  575.51   13.93
  -3   6  -3  612.63   15.74
   3  -6   3  568.80    9.95
  -3   6  -3  543.49    9.98
  -5   1   2  280.46   11.06
  -5   1   2  278.46   10.84
   5  -1  -2  277.51   10.03
   5  -1  -2  278.14   10.04
   0  -5   6   54.64   11.42
   0   5  -6   42.40    5.03
   0  -5   6   41.29    3.75
   1  -5   6 1906.53   32.70
   4  -5  -2  693.94   11.80
  -4   5   2  681.76   16.78
   4  -5  -2  695.29   17.17
   4  -5  -2  723.88   15.46
  -1   3  -7  238.57   20.17
   1  -3   7  264.32    9.97
  -1   3  -7  257.26    4.32
   4   1  -5    1.34    0.85
  -4  -1   5    2.44    1.87
  -4  -1   5    2.55    2.01
   4   1  -5    5.61    2.82
   2   5  -2   41.87    3.85
   2   5  -2   39.82    5.29
  -2  -5   2   39.03    4.25
  -2  -5   2   37.16    4.15
  -5   3   2    1.23    1.23
   5  -3  -2   -0.21    1.04
   5  -3  -2    1.93    1.77
   5  -3  -2   -5.75    6.89
  -2  -5   3    0.90    1.07
   2   5  -3    1.11    2.09
  -2  -5   3    0.07    1.66
   2   5  -3   -0.81    1.66
  -1   1   7    7.65    4.09
  -1   1   7   16.03    5.98
   1  -1  -7   11.44    5.87
   1  -1  -7   16.82    6.18
   1  -1   7   27.07   10.99
  -1   1  -7   26.87    4.51
   1  -1   7   27.31    3.85
  -1   1  -7   14.03    8.81
   4   2  -4  117.07    9.43
   4   2  -4  118.62    7.88
  -4  -2   4  123.88    8.21
  -4  -2   4  123.66    8.43
   5  -1   0  367.20   25.77
  -5   1   0  394.77   14.03
   5  -1   0  392.28   14.43
   5  -1   0  389.04   13.72
   2  -1  -7    5.00    3.39
  -2   1   7   25.61    5.41
   2  -1  -7   24.70    3.76
  -2   1   7   22.13    7.41
   5  -2  -3  212.09   13.22
   5  -2  -3  227.16   13.97
  -5   2   3  239.01   15.84
  -5   2   3  233.90   15.86
   0   4  -7   10.83    4.32
   0   4  -7   20.00    6.92
   0  -4   7   23.45    3.48
   0  -4   7   21.21   10.93
   4   2   0  260.08    5.12
  -4  -2   0  258.75    6.97
  -4  -2   0  263.32   13.16
   4   2   0  250.85   15.70
  -5   1   3  140.75   10.06
   5  -1  -3  165.05   10.36
  -5   1   3  160.38   10.41
   5  -1  -3  158.16    9.98
   4  -5   3   -3.77    6.54
  -4   5  -3    8.32   10.10
   4  -5   3    3.87    3.44
  -4   5  -3    2.62    2.57
  -4   3  -4    8.09    9.70
   4  -3   4   -3.00    9.75
   4  -3   4    2.38    2.26
  -4   3  -4    6.28    3.34
  -5   3  -1  388.18   14.18
   5  -3   1  389.71   13.98
  -5   3  -1  372.94   20.09
   3   4  -2  363.30   12.76
  -3  -4   2  379.85   15.08
   3   4  -2  369.03   13.08
  -3  -4   2  373.58   14.14
   2  -4  -5 2672.86   43.65
  -2   4   5 2508.36   39.31
  -2   4   5 2512.21   37.91
   1  -6   5    0.87    4.45
   1  -6   5   -0.82    2.99
  -1   6  -5   -2.42    2.54
   1  -6   5    1.07    0.80
   5  -2   1  406.94   15.74
   5  -2   1  433.52   30.11
   5  -2   1  395.88   13.87
  -5   2  -1  399.89   14.52
   3   4  -3  355.05   14.50
  -3  -4   3  355.96   17.43
   3   4  -3  340.45   11.89
  -3  -4   3  349.24   14.53
   2  -6  -2  678.65   11.22
  -2   6   2  682.73   11.76
  -2  -5   1   -0.83    1.84
   2   5  -1    0.37    0.89
  -2  -5   1    1.55    1.13
   2   5  -1    0.39    1.66
   3   1   4   14.48   10.07
   3   1   4    8.57    4.04
   3   1   4    8.45    4.13
  -3  -1  -4   12.34    6.05
   2   4  -6  112.44    8.39
  -2  -4   6  107.84    5.39
   3   2   3    1.82    1.17
   3   2   3    2.93    2.02
  -3  -2  -3    0.83    1.82
  -3  -2  -3    0.96    2.36
   5  -4   0  403.33   23.52
  -5   4   0  392.92   21.75
  -5   4   0  391.40   14.18
   5  -4   0  399.35   13.97
  -4   2  -4   32.30    5.22
   4  -2   4   40.19    5.79
   4  -2   4   -3.55   10.90
  -4   2  -4   17.39   13.66
  -5   4   1  204.27   13.65
   5  -4  -1  192.08   12.21
   5  -4  -1  186.73   20.88
  -5   4   1  188.04   19.57
  -2  -5   4   97.68    7.01
  -2  -5   4   97.66    5.92
   2   5  -4   92.09    6.17
   2   5  -4   88.95    7.80
  -2   0  -6    2.58    6.90
   2   0   6    5.44    2.64
  -2   0  -6    8.92    4.79
   2   0   6    3.38    7.95
   4  -4  -4   44.62    9.16
   4  -4  -4   44.59    5.55
  -4   4   4   47.61    8.13
   4  -4  -4   46.33    3.70
   2  -3  -6 1561.20   25.12
  -2   3   6 1623.36   26.18
  -2   3   6 1548.63   23.39
   0   5   3  144.83    9.20
   0  -5  -3  142.75    9.94
   0   5   3  143.63   10.09
   0  -5  -3  138.09    9.11
   2   4   2    5.92    3.47
   2   4   2    5.33    2.55
  -2  -4  -2    4.02    2.88
  -2  -4  -2    8.35    3.72
   4   0   3  124.12   19.22
   4   1   2  287.32   10.55
  -4  -1  -2  276.55   11.88
   4   1   2  287.02   10.41
  -4  -1  -2  286.50   10.63
   5   0  -2 1256.90   19.68
  -5   0   2 1261.56   20.55
   5   0  -2 1280.48   21.00
  -5   0   2 1205.24   22.99
   1  -4   7  500.07   24.54
   1  -4   7  431.89   15.42
  -1   4  -7  430.02   17.52
  -1   4  -7  440.74   16.88
  -4   4  -4  183.64   12.38
   4  -4   4  184.61   11.72
  -4   4  -4  165.64   18.47
   4  -4   4  153.97   20.11
  -3   5  -5    3.23    6.09
   3  -5   5    8.92    9.00
   3  -5   5   15.11    5.44
  -3   5  -5   15.96    6.40
   1   6  -2  247.84   15.58
  -1  -6   2  241.28   17.30
   1   6  -2  245.12   15.67
  -1  -6   2  242.86   16.09
  -3  -4   1  899.15   16.48
  -3  -4   1  889.80   16.58
   3   4  -1  925.68   15.73
   3   4  -1  938.59   15.36
   1  -4  -5  304.49   11.77
  -1   4   5  306.13   10.54
  -1   4   5  282.39   10.88
  -2  -3   7 1459.25   23.70
   2   3  -7 1450.25   23.24
   5   0  -1   64.58    6.46
   5   0  -1   62.50    4.43
  -5   0   1   69.14    4.90
  -5   0   1   60.97    5.47
   0   6  -5    1.88    3.13
   0  -6   5    2.04    2.24
   0  -6   5    1.57    3.26
   0  -6   5    1.47    1.62
   1   6  -3    1.00    1.27
  -1  -6   3    2.32    3.34
   1   6  -3    0.16    2.11
  -1  -6   3    0.00    2.08
   4  -3  -5    0.87    0.66
  -4   3   5    2.16    3.66
   4  -3  -5   -1.04    3.12
   4  -3  -5    1.09    2.52
   5  -3  -3  208.21   12.81
   5  -3  -3  215.44   13.60
   5  -3  -3  208.11   18.91
   1   4  -7 1085.35   17.64
  -1  -4   7 1099.25   18.77
  -1  -4   7 1084.99   16.89
   1   4  -7 1097.26   18.16
   2  -5  -4  205.01   14.10
  -2   5   4  194.15   13.28
   2  -5  -4  216.02   13.17
  -2   5   4  209.06   12.90
   1   5  -6 1996.45   31.70
  -1  -5   6 1883.63   34.80
  -1  -5   6 1929.04   29.69
   0   6   1  266.76   10.62
   0   6   1  281.77   10.97
   0  -6  -1  277.90   13.19
   0  -6  -1  265.44    9.93
  -3   0   7    0.82    1.12
   3   0  -7    1.70    1.48
   3   0  -7    6.65    2.96
  -3   0   7    3.33    2.45
   2  -5   6  302.60   11.02
  -2   5  -6  293.53   16.17
   2  -5   6  280.35   15.57
  -2   5  -6  297.45   11.43
  -1   3   6  207.66   12.72
   1  -3  -6  225.47   14.76
  -1   3   6  163.40   15.36
  -1   3   6  210.74   13.46
  -3  -4   4  225.55   14.50
   3   4  -4  239.44   14.88
   3   4  -4  238.19   15.07
  -3  -4   4  240.65   15.33
  -4   6  -1  290.24   15.33
   4  -6   1  301.46   13.65
   4  -6   1  334.24   12.24
   3  -6  -2    7.14    2.83
  -3   6   2    4.00    4.37
   3  -6  -2    7.98    7.68
  -3   6   2   -1.14    2.60
  -5   4  -1  109.71   15.48
   5  -4   1  121.18    8.13
  -5   4  -1  131.14   12.74
   5  -4   1  108.73   17.51
   1  -6  -2    5.36    4.33
  -1   6   2    3.55    3.81
   1  -6  -2    5.95    2.73
  -1   6   2    4.94    2.63
   2  -6   5  152.20   22.75
  -2   6  -5  144.51   11.60
   2  -6   5  141.18    9.68
  -2   6  -5  102.89    8.99
   0   1   7  414.36   19.74
   0   1   7  377.72   13.20
   0  -1  -7  367.11   13.57
   0  -1  -7  343.59   16.95
   3  -6   4    0.98    1.57
  -3   6  -4    2.34    2.28
  -3   6  -4   -2.38    4.73
   3  -6   4    7.83    6.75
   3  -4  -5  337.17   12.81
  -3   4   5  336.60   13.25
   4  -6   0   -0.49    1.74
   4  -6   0   -0.16    6.39
   4  -6   0    0.35    2.99
  -4   6   0    0.68    4.91
  -3  -1   7   28.02    7.36
   3   1  -7   23.11    4.66
  -3  -1   7   21.09    7.50
   3   1  -7   21.13    7.07
   5   0  -3  189.28   12.02
  -5   0   3  188.33   12.48
  -5   0   3  187.73   12.23
   5   0  -3  183.96   11.98
  -1  -5  -2   11.61    4.34
   1   5   2   11.84    5.42
  -1  -5  -2   16.85    6.30
   1   5   2   14.18    5.07
   5  -1   1  959.55   15.70
   5  -1   1  962.60   33.07
   5  -1   1  953.30   15.54
  -5   1  -1  961.20   16.06
   5  -4  -2  215.56   13.57
   5  -4  -2  217.72   13.63
   5  -4  -2  188.21   18.60
   4   0  -6  187.72   11.62
   4   0  -6  197.68   12.85
  -4   0   6  178.52   11.52
   4   0  -6  193.39   11.97
  -3  -3   6  253.12   16.32
   3   3  -6  244.52   15.26
  -3   0  -5  256.84    5.82
   3   0   5  254.62    3.67
   3   0   5  280.07   22.36
   3   0   5  263.89   11.28
   4  -1  -6  162.74   11.29
   4  -1  -6  168.81   11.51
  -4   1   6  128.99    8.12
   4  -1  -6  182.43   11.33
   4  -5  -3  742.60   15.28
  -4   5   3  820.65   16.97
   4  -5  -3  744.27   13.42
  -4   5   3  764.72   17.25
  -1  -6   1   36.03    4.31
  -1  -6   1   34.02    3.99
   1   6  -1   34.18    4.92
   1   6  -1   30.76    5.82
   2  -7   2   42.39    8.93
  -2   7  -2   30.68    4.40
   2  -7   2   41.25   10.96
  -1   0  -7   38.56   14.60
   1   0   7   38.79    4.43
  -1   0  -7   42.62    4.32
   1   0   7   34.52   13.81
   2  -7   1  156.97   12.41
  -2   7  -1  122.55   10.39
  -2   7  -1  138.97   11.69
   2  -7   1  121.02    9.91
  -4  -2   5  270.18   11.81
   4   2  -5  292.88   11.95
  -4  -2   5  285.57   10.22
   4   2  -5  287.05   10.05
  -2  -5   0  333.45   12.26
   2   5   0  347.23   13.05
  -2  -5   0  325.02   12.60
   2   5   0  323.88   11.77
  -5   1   4  580.72   13.38
   5  -1  -4  569.98   11.14
  -5   1   4  565.32   10.15
   5  -1  -4  579.31    9.67
  -4   6  -2   86.38   14.51
   4  -6   2   88.08   11.55
   4  -6   2   76.04    5.60
  -4   6  -2   77.25   10.39
  -1  -6   4   46.74    8.56
   1   6  -4   38.21    4.28
  -1  -6   4   45.24    4.99
   1   6  -4   32.30    5.11
   3   3   2  669.30   11.23
  -3  -3  -2  663.95   12.02
  -3  -3  -2  658.47   11.56
   3   3   2  691.31   11.72
  -3   5   4 4283.06   66.63
   3  -5  -4 4371.77   16.16
   5   0   0  805.59   13.81
  -5   0   0  799.23   15.20
   5   0   0  801.10   14.81
  -5   0   0  811.84   14.32
  -5   3  -2   43.73    9.08
   5  -3   2   42.95    7.22
   5  -3   2   20.23   15.87
  -5   3  -2   19.24   13.04
  -1   7  -2  128.43   11.42
   1  -7   2  126.75   11.43
  -1   7  -2  108.63    4.35
   1  -7   2  128.62   10.49
   5  -2  -4   86.33    7.53
   5  -2  -4   69.42    8.03
  -5   2   4   90.72    5.82
   5  -2  -4   95.50    5.45
   4  -1   4   35.27   18.40
   4  -1   4   56.24    5.14
  -4   1  -4   49.44    8.94
   3  -1  -7  459.93   15.75
  -3   1   7  469.01   16.33
  -3   1   7  428.48   15.44
   3  -1  -7  428.46   14.90
  -1   5   4 2098.27   32.92
   1  -5  -4 1945.44   29.75
   1  -5  -4 1960.53   31.50
  -1   5   4 2071.95   31.61
   1   3   5   20.20    6.91
   1   3   5    8.21   13.51
   1   3   5   26.19    4.70
  -1  -3  -5   30.50    6.61
  -4  -2  -1 2775.30   45.04
   4   2   1 2853.85   44.17
   4   2   1 2780.96   44.08
   4  -6  -1 1093.79   23.53
   4  -6  -1 1055.06   22.64
   4  -6  -1 1086.54   19.19
  -4   6   1 1146.22   23.12
  -2  -5   5  385.97   17.07
   2   5  -5  383.23   13.70
  -2  -5   5  398.63   14.16
   2   5  -5  395.31   14.26
   3  -3   6  634.93   12.95
  -3   3  -6  633.50   20.42
   3  -3   6  729.24   25.04
  -3   3  -6  641.60   12.41
   2  -7   3  111.98   10.44
   2  -7   3  118.71    8.34
  -2   7  -3  110.87    9.14
   2  -7   3  107.09    4.82
  -5   2  -2   59.19    6.44
   5  -2   2   61.77    5.51
   5  -2   2   63.95    5.47
   5  -2   2   68.10   23.16
   1  -7   3   57.47    5.22
   1  -7   3   60.46    8.17
  -1   7  -3   47.61    7.12
  -1   7  -3   57.68    5.49
   1  -7   1  101.59    7.31
   1  -7   1   95.76    8.17
  -1   7  -1   81.74    7.55
  -1   7  -1   97.06    6.27
  -1  -1   8   91.12    5.33
   1   1  -8  104.97    9.79
   1   1  -8   92.49    6.47
  -1  -1   8   95.20    7.69
  -1  -2   8  273.06   11.75
   1   2  -8  294.21   12.94
  -1  -2   8  267.04    9.63
   1   2  -8  264.73    9.48
   3   4   0  204.96   13.59
  -3  -4   0  220.49   14.20
  -3  -4   0  223.00   14.90
   3   4   0  215.00   13.62
  -4  -1   6  488.30   18.12
   4   1  -6  487.07   18.08
  -2   2   7   73.33    5.37
  -2   2   7   62.77    5.29
   2  -2  -7   71.09    8.51
   2  -2  -7   97.32    8.80
  -2   3  -7  520.82   18.22
   2  -3   7  539.15    5.08
  -2   3  -7  527.60   24.20
   2  -3   7  531.68   13.98
  -2  -2  -5  644.70   12.13
   2   2   5  675.70   11.37
   2   2   5  692.68   28.09
   2   2   5  668.62   11.68
   3   2  -7  997.82   16.11
  -3  -2   7  977.40   16.19
   4   3  -2 2893.06   45.09
  -4  -3   2 3065.02   51.23
   1   2   6   41.92   14.03
  -1  -2  -6   53.47    6.31
   1   2   6   45.28    4.08
   1   2   6   42.91    6.12
   3  -2   6  317.25   20.83
  -3   2  -6  316.96   19.25
   3  -2   6  337.83   12.43
  -3   2  -6  339.54   12.47
   0   2  -8    2.54    1.54
   0  -2   8    0.91    1.15
   0  -2   8    0.08    3.03
   0   2  -8   -0.16    4.49
   5  -4   2   52.20   16.88
  -5   4  -2   40.73    5.46
   5  -4   2   38.82    3.77
  -5   4  -2   37.38   12.01
  -2   2  -7  331.95   13.00
   2  -2   7  326.91   11.53
   2  -2   7  313.44   18.36
  -2   2  -7  288.65   17.69
  -2   7   0  354.24   14.93
   2  -7   0  363.70   15.41
  -2   7   0  349.94   15.00
   2  -7   0  345.32   14.52
  -4   5  -4    1.86    6.93
   4  -5   4    3.21    7.26
  -4   5  -4    1.43    1.42
   4  -5   4    0.96    2.64
  -1   2   7  433.91   15.33
  -1   2   7  458.71   18.29
   1  -2  -7  426.50   18.29
   1  -2  -7  402.83   14.18
   4   3  -3   32.54    3.97
  -4  -3   3   36.60    5.73
   4   3  -3   38.82    5.87
  -4  -3   3   38.45    7.32
  -5   0   4  907.20   15.30
  -5   0   4  896.19   16.84
   5   0  -4  913.75   15.41
   5   0  -4  886.27   14.33
   2   3   4    7.16    3.05
   2   3   4    1.38    1.64
  -2  -3  -4    7.24    4.04
   4  -2  -6   68.21    6.65
  -4   2   6   69.10    8.02
  -4   2   6   72.43    5.39
   4  -2  -6   74.45    4.37
  -3  -4   5  562.36    9.19
   3   4  -5  565.37    9.27
  -3  -4   5  554.08    6.39
   3   4  -5  580.92   12.00
  -1  -4  -4  767.05   13.64
   1   4   4  755.01   12.54
  -1  -4  -4  730.13   13.36
   1   4   4  762.10   12.56
   5  -5   0  143.69   18.82
  -5   5   0  126.34   16.89
   5  -5   0  154.44   10.18
  -5   5   0  159.59   14.07
  -3   4  -6  160.45   17.37
  -3   4  -6  172.53   11.49
   3  -4   6  187.29   11.88
   3  -4   6  189.52   21.66
   3  -7   1   26.19    6.84
   3  -7   1   18.02   10.11
   3  -7   1   25.16    5.30
  -3   7  -1   21.13    8.98
  -1  -6   0   31.03    6.74
   1   6   0   21.97    3.93
  -1  -6   0   33.91    5.33
   1   6   0   24.65    5.45
   3  -7   2    4.41    3.62
  -3   7  -2   -2.50    3.19
   3  -7   2    4.03    5.45
   3  -7   2   -0.52    1.22
   5  -4  -3    0.60    0.65
   5  -4  -3   -0.73    4.96
   5  -4  -3    0.22    0.79
   5  -4  -3    3.86    5.05
   0   5  -7  808.17   15.18
   0  -5   7  810.39   12.81
   0  -5   7  806.91   20.94
   0   5  -7  775.23   14.20
   0  -1   8   29.99    3.12
   0   1  -8   20.30    9.48
   0  -1   8   24.33    6.04
   0   1  -8   32.63    3.52
   5  -5  -1    3.55    6.35
  -5   5   1    6.80    9.31
   5  -5  -1    6.65    2.92
  -1   6  -6    5.18    5.49
   1  -6   6    5.16    4.54
   1  -6   6    2.53    1.97
  -1   6  -6   -0.32    2.01
   5  -3  -4   96.53   14.81
   5  -3  -4  100.95    5.59
   5  -3  -4   93.78    6.71
   5  -3  -4   82.26    9.51
   0   3  -8  313.09   11.70
   0   3  -8  289.78   12.91
   0  -3   8  295.03   10.70
   0  -3   8  326.50   20.75
  -5   5  -1   53.77   11.60
   5  -5   1   65.38   13.61
   5  -5   1   54.37    4.76
  -5   5  -1   56.38    6.36
   5   1  -2  141.69    9.48
  -5  -1   2  134.04   10.49
   5   1  -2  120.57    9.57
  -5  -1   2  123.00   11.40
   4  -6   3   42.50    7.34
  -4   6  -3   41.05    9.66
  -4   6  -3   36.78    9.91
   4  -6   3   41.10   10.71
   4   3  -1    0.57    0.78
  -4  -3   1   -1.08    2.72
   4   3  -1    0.68    0.89
  -4  -3   1   -0.99    1.91
   2   1  -8    3.99    3.17
  -2  -1   8    2.72    2.97
   2   1  -8    7.21    2.90
  -2  -1   8    5.84    2.84
   1  -5   7    0.95    1.31
   1  -5   7    2.27    1.46
  -1   5  -7   -0.03    3.75
  -1   5  -7    0.79    1.34
   0   3   6  309.52   11.35
   0   3   6  306.03   11.14
   0   3   6  312.94   20.90
   0  -3  -6  305.27   12.25
   0  -4  -5  252.19   17.45
   0   4   5  244.89   15.42
   0   4   5  263.80    9.58
  -1   0   8    2.13    2.89
  -1   0   8   14.12    4.91
   1   0  -8   15.40    7.17
   1   0  -8    4.26    5.12
  -2   4  -7  675.09   17.56
  -2   4  -7  736.21   13.22
   2  -4   7  754.05   12.77
   2  -4   7  692.16   18.35
  -1  -3   8  357.20   18.68
   1   3  -8  339.43   11.80
  -1  -3   8  334.35   11.66
   1   3  -8  323.84   13.08
   1  -7   4  243.57   19.37
  -1   7  -4  240.24   16.54
   1  -7   4  251.74   16.24
   1  -7   4  273.95   15.57
  -1  -6   5  451.03   19.62
  -1  -6   5  473.26   17.01
   1   6  -5  426.05   15.58
   1  -7   0   23.35    5.85
  -1   7   0   20.26    8.37
   1  -7   0   26.77    3.94
  -1   7   0   24.41    5.28
   4   3  -4  321.04   13.15
  -4  -3   4  345.67   15.81
  -4  -3   4  334.53   12.16
   4   3  -4  335.05   11.74
   3  -7   0  583.72   11.43
   3  -7   0  575.20   14.98
  -3   7   0  558.99   10.40
  -3   7   0  519.12   19.31
   5   1  -3  141.55    9.59
  -5  -1   3  148.67   10.02
   5   1  -3  143.66   11.93
  -5  -1   3  146.08   12.65
  -5   0  -1    0.19    0.26
   0   6  -6    3.79    3.30
   0  -6   6    2.30    3.13
   0  -6   6    4.92    2.50
   0  -6   6    2.52    2.17
   2  -7   4  169.78   11.21
   2  -7   4  200.66   13.78
  -2   7  -4  201.15   13.96
   2  -7   4  205.64   16.46
   5  -1   2   22.22    5.32
  -5   1  -2   24.74    4.45
   5  -1   2   26.79    3.04
   5  -1   2   28.05   21.14
  -2  -1  -6  339.90   12.84
   2   1   6  319.22   11.49
   2   1   6  344.21   13.12
   2   1   6  326.41   28.95
   5   1  -1 3207.86   49.43
  -5  -1   1 3003.09   46.88
   5   1  -1 3217.66   49.55
   4  -6  -2  220.42   17.54
  -4   6   2  199.79   15.96
   4  -6  -2  236.81   15.47
   2   2  -8  419.74   15.19
  -2  -2   8  435.19   15.88
   2   2  -8  416.55   14.13
  -2  -2   8  424.20   15.71
  -2  -4   7  148.45   12.32
   2   4  -7  110.63   10.00
   0  -6  -2   20.82    7.31
   0  -6  -2   18.11    7.14
   0   6   2   17.85    6.73
   0   6   2   15.56    6.20
   3  -6  -3 1187.33   21.10
   3  -6  -3 1197.82   18.95
  -3   6   3 1229.44   20.29
  -2   1  -7  884.33   17.30
   2  -1   7  857.78   13.89
  -2   1  -7  771.75   22.50
   2  -1   7  809.25   24.66
   2   0  -8   12.30    5.45
   2   0  -8   27.91    6.09
  -2   0   8   22.03    6.57
  -2   0   8   28.40    4.96
   3  -2  -7  976.52   15.42
  -3   2   7  925.11   14.60
  -3   2   7  946.05   16.29
   3  -2  -7  948.32   16.46
   4  -3   5   80.48   18.09
  -4   3  -5   93.15    8.41
   4  -3   5   91.19    8.27
   3  -6   5  720.05   20.20
   3  -6   5  739.75   12.37
  -3   6  -5  736.95   16.00
  -3   7  -3    1.98    3.68
   3  -7   3    3.18    3.93
   3  -7   3    0.34    5.72
   3  -7   3    0.40    0.80
   0   7  -2  280.94   10.42
   0  -7   2  308.64   15.09
   0   7  -2  293.10   12.72
   0  -7   2  301.60   13.22
   2   5   1  212.22   13.21
  -2  -5  -1  236.56   15.47
   2   5   1  219.38   13.99
  -2  -5  -1  214.18   13.71
   4   1   3 1101.39   17.78
  -4  -1  -3 1103.23   19.27
   4   1   3 1083.40   18.08
   4   1   3 1130.23   40.05
   4  -4  -5 1360.02   22.81
  -4   4   5 1316.70   22.27
   4  -4  -5 1265.45   19.15
  -3   1  -6   37.75   12.94
   3  -1   6   42.42   17.66
   3  -1   6   66.37    4.48
  -3   1  -6   71.57    6.25
   0   7  -3   14.38    5.34
   0  -7   3    3.51    3.25
   0  -7   3   10.70    5.72
   0   7  -3    9.61    5.71
   5  -1  -5   -0.01    0.99
  -5   1   5   -0.56    1.38
   5  -1  -5   -1.22    2.52
   5  -1  -5   -0.26    0.98
   2   4   3  926.17   15.01
  -2  -4  -3  932.16   15.77
   2   4   3  913.68   14.65
  -2  -4  -3  915.18   16.54
  -5   5   2   36.25   10.09
   5  -5  -2   57.83   14.29
   5  -5  -2   39.64    9.66
   5  -5  -2   50.95    9.47
   2  -7  -1   58.13    9.15
   2  -7  -1   60.47    8.26
  -2   7   1   48.46    8.90
   4  -4   5  241.29   12.88
  -4   4  -5  245.41   14.68
   4  -4   5  213.05   22.11
  -5   3  -3   23.17    5.45
   5  -3   3   -2.01   11.85
   4   2  -6  116.29   11.75
   4   2  -6  133.71   12.37
  -4  -2   6  111.56   11.18
  -5   5  -2  156.84   20.02
  -5   5  -2  140.28   13.89
   5  -5   2  183.83   23.03
   1  -6  -3 1191.50   29.31
  -1   6   3 1185.02   26.68
   1  -6  -3 1205.64   27.01
   2  -6   6   14.63    2.84
  -2   6  -6   16.66    5.15
   2  -6   6   28.14    8.92
  -3  -2  -4   24.65    5.12
   3   2   4   23.97    2.84
   4  -5  -4  167.35   15.64
  -4   5   4  141.30   15.39
   4  -5  -4  142.59   15.33
  -4   5   4  219.87   22.73
   4   0   4 1204.50   28.41
  -4   0  -4 1154.32   26.88
   4   0   4 1145.23   37.99
  -1  -1  -7 1013.14   23.14
  -1  -1  -7 1036.09   29.99
   1   1   7 1044.32   32.27
   1   1   7  996.36   22.75
  -1  -5   7   18.82    2.44
   1   5  -7   24.96    5.72
  -1  -5   7    7.63    4.59
  -1  -5   7   22.28   10.99
   4  -2   5  196.71   26.23
  -4   2  -5  235.32   13.47
   5  -2  -5    0.09    0.99
   5  -2  -5   -0.44    3.46
  -5   2   5    0.80    1.06
   5  -2  -5    1.04    1.06
   3   4   1 1567.84   35.64
  -3  -4  -1 1454.01   33.69
   3   4   1 1571.05   36.97
  -3  -4  -1 1476.58   33.99
  -2  -5   6 1045.13   23.89
  -2  -5   6 1041.79   28.73
   3  -5   6  109.46   17.77
  -3   5  -6  113.76   11.21
   3  -5   6  113.24   12.14
  -1   2  -8  707.64   24.25
  -1   2  -8  694.90   27.64
   1  -2   8  751.96   21.45
   1  -2   8  722.23   16.53
   0  -7   1    5.20    2.22
   0   7  -1    1.58    2.02
   0  -7   1    7.40    4.89
   0   7  -1    1.86    2.58
   0   0  -8  142.38   13.94
   0   0   8  138.44   13.70
   0   0   8  136.69   16.43
   0   0  -8  130.54   16.92
   0   2   7    0.03    5.29
   0   2   7    2.31    2.18
   0  -2  -7    5.93    1.96
  -5  -1   4   75.35    8.22
   5   1  -4   71.44    7.66
  -5  -1   4   77.74    8.88
   5   1  -4   82.00    8.63
   0   5   4  547.13   18.19
   0  -5  -4  503.11   16.87
   0  -5  -4  505.82   18.45
  -1   3  -8   50.69    6.73
  -1   3  -8   47.86    9.31
   1  -3   8   43.38    4.77
   1  -3   8   45.08    9.53
   4   3   0   96.16    9.81
  -4  -3   0  104.79   12.70
  -4  -3   0  101.24   14.42
   5   0  -5   33.08    4.97
  -5   0   5   36.14    4.52
   5   0  -5   31.96    3.23
  -5   0   5   35.79    6.78
   0  -4   8  302.08   20.23
   0  -4   8  300.77   16.02
   0   4  -8  292.14   15.47
   0   4  -8  301.58   17.27
  -4  -2  -2  790.32   21.98
   4   2   2  793.10   20.68
  -4  -2  -2  771.83   21.70
  -1  -5  -3   11.35    4.56
  -1  -5  -3   12.32    3.11
   1   5   3    7.73    1.81
   5  -4   3  140.50   27.08
  -5   4  -3   95.39   11.53
   3   1   5   21.77    5.26
  -3  -1  -5   26.06    9.83
   3   1   5   13.99   10.01
  -3  -3   7  341.76   20.03
   3   3  -7  423.14   15.29
  -5  -1   0   24.65    3.74
  -5  -1   0   37.40    7.49
   5   1   0   28.78    3.67
   3  -7  -1    7.12    6.80
   3  -7  -1    2.81    1.80
  -3   7   1   -0.34    2.25
   0  -7   4   10.64    3.28
   0   7  -4    9.56    5.11
   0  -7   4    7.79    4.24
  -2   4   6 1104.80   25.32
   2  -4  -6 1094.29   24.92
   4  -3  -6  161.18   16.14
  -4   3   6  147.61   15.12
   4  -3  -6  155.45   14.20
   4  -3  -6  129.34   13.22
  -5   2  -3  874.15   21.68
   5  -2   3  929.95   41.79
  -4  -3   5  463.70   15.43
   4   3  -5  472.98   15.64
   4   3  -5  478.78   16.86
  -4  -3   5  476.11   19.81
   3   4  -6  823.20   19.16
  -3  -4   6  849.24   21.86
  -1  -6  -1  310.56   18.91
   1   6   1  319.35   17.15
  -1  -6  -1  311.83   17.01
   1   6   1  278.69   15.17
   2  -5  -5   15.13    4.38
  -2   5   5    5.66    1.77
  -2   5   5   12.08    4.42
   2  -5  -5   10.03    2.01
   1  -7   5  313.33   21.58
   1  -7   5  305.42   16.86
   1  -7   5  325.22   19.59
   2  -5   7 1796.85   39.87
   2  -5   7 1843.97   43.99
  -2   5  -7 1943.65   43.77
   4   0  -7  116.15   10.85
  -4   0   7  128.11   12.17
   4   0  -7  120.20   11.40
   4   0  -7  118.75   12.15
   2   3  -8   83.90   10.28
  -2  -3   8  103.60   12.16
   2   3  -8   71.17    7.48
   3   3   3  783.66   18.21
  -3  -3  -3  773.92   18.47
  -3  -3  -3  775.73   18.67
   1  -7  -1   26.07    6.31
   1  -7  -1   30.94    5.34
  -1   7   1   26.91    6.43
   5  -4  -4   24.22    4.43
   5  -4  -4   14.52    6.56
   5  -4  -4   17.57    5.66
   5  -4  -4    8.69    6.72
  -4   6  -4  204.26   14.05
   4  -6   4  187.02   21.21
   2  -1  -8  114.96   11.46
   2  -1  -8  122.37   13.56
  -2   1   8  132.44   13.99
  -2   1   8  102.56   10.62
  -1   1   8   22.37    3.31
   1  -1  -8   27.22    4.63
   1  -1  -8   20.51    6.31
  -1   1   8   12.77    3.96
  -1  -4   8 3528.54    6.99
  -1   1  -8    2.38    2.01
   1  -1   8    3.49    1.57
   1  -1   8   -1.69    5.42
  -1   1  -8    0.42    6.38
   3  -7   4   65.70    7.29
   3  -7   4   60.76    9.82
  -3   7  -4   65.75    9.99
  -3   4   6  407.41   14.67
   3  -4  -6  452.70   15.99
  -4   1   7  237.23   14.11
   4  -1  -7  223.59   11.68
  -4   1   7  219.73   11.94
   4  -1  -7  228.57   12.73
  -3  -5   3  126.43   13.45
   3   5  -3  109.31   10.67
  -3  -5   3  123.52   11.94
  -2  -6   3  135.27   13.05
  -2  -6   3  126.66   13.81
   2   6  -3  129.39   12.47
   2  -7   5   81.37   16.51
   2  -7   5  138.52   19.00
   2  -7   5  104.65   10.66
  -4   7  -1  433.00   18.65
   4  -7   1  413.97   16.47
   4  -7   1  408.21   19.67
  -3   5   5  351.65   19.39
   3  -5  -5  397.42   14.64
   4  -5   5  119.38   20.07
  -4   5  -5  110.41   11.24
  -1  -6   6  258.88   14.10
  -1  -6   6  270.50   16.72
  -1  -6   6  284.84   15.40
  -2   3   7    0.34    0.76
   2  -3  -7    4.68    2.41
  -2   3   7   -0.71    1.98
  -1   4   6  126.21   16.01
  -1   4   6  173.11   16.07
   1  -4  -6  180.54   17.02
   3   5  -2   76.55    8.14
  -3  -5   2   88.39   10.55
  -3  -5   2   87.77   10.35
   2   6  -2  162.25   15.94
  -2  -6   2  177.16   17.11
  -2  -6   2  170.51   16.14
   3   1  -8   38.22    4.17
  -3  -1   8   46.51    7.05
  -3  -1   8   33.15    4.38
   3   1  -8   37.00    4.22
   4   1  -7   21.26    2.37
   4   1  -7   16.93    2.08
  -4  -1   7   18.18    3.37
   4   1  -7   15.35    2.99
   5  -3  -5  456.52   20.78
   5  -3  -5  437.98   17.59
   5  -3  -5  417.20   13.89
   5  -3  -5  440.67   15.24
   0   7   0  381.36   13.74
   0  -7   0  381.94   15.48
   0  -7   0  376.51   13.92
   0   7   0  344.28   18.91
  -3   0   8   24.00    5.24
   3   0  -8   22.85    4.71
   3   0  -8   26.41    4.69
  -3   0   8   22.13    3.58
  -5   0  -2 1537.38   36.80
   5   0   2 1676.00   60.40
  -2   0  -7   -2.32    6.36
  -2   0  -7    0.64    0.72
   2   0   7    0.97    0.68
   2   0   7    0.90    8.68
   5  -5  -3  746.92   20.93
   5  -5  -3  734.08   17.30
   5  -5  -3  782.06   20.63
  -5   6   0  229.36   18.97
   5  -6   0  235.34   18.39
   4  -7   0 1078.94   26.11
   4  -7   0 1119.33   31.25
  -4   7   0 1139.04   28.97
   4  -6  -3 1882.77   44.46
   4  -6  -3 1966.90   43.89
  -4   6   3 1940.27   44.80
  -4   7  -2   50.86   10.23
   4  -7   2   63.16   12.12
   4  -7   2   65.41    9.91
   4  -1   5  868.74   37.85
  -4   1  -5  782.45   20.24
  -5   6  -1  365.97   22.06
   5  -6   1  360.39   23.40
  -5   6  -1  349.26   22.41
  -3  -5   4   21.98    5.02
  -3  -5   4   26.36    5.44
   3   5  -4   28.30    3.82
   5  -5   3  546.48   25.79
  -5   5  -3  545.64   19.37
  -2  -6   4  285.70   15.52
   2   6  -4  288.41   15.82
  -2  -6   4  276.98   16.57
   1  -5  -5  781.04   17.76
   1  -5  -5  740.64   18.17
  -1   5   5  748.94   17.07
  -5  -1   5  263.68   15.06
  -5  -1   5  253.87   13.50
   5   1  -5  242.12   12.74
   3   0   6  735.10   31.84
  -3   0  -6  735.02   20.43
   0  -7   5  898.75   20.99
   0  -7   5  908.10   22.20
   0  -7   5  907.70   25.42
  -1   3   7 1248.13   27.62
  -1   3   7 1263.60   28.51
   1  -3  -7 1251.08   28.31
  -1   3   7 1293.51   31.92
   5  -1   3   -4.42   13.42
  -5   1  -3    8.89    3.41
   2  -7  -2  450.13   17.04
   2  -7  -2  452.54   15.65
  -2   7   2  473.26   16.26
   5  -6  -1  295.62   19.56
  -5   6   1  244.16   17.40
   5  -6  -1  273.71   19.62
  -5  -2   2 1092.86   31.07
  -5  -2   2 1070.08   25.98
   5   2  -2 1051.61   24.00
  -5  -2   3   14.50    3.25
   5   2  -3   20.69    3.29
  -5  -2   3   22.44    3.87
   1  -6   7  201.56   13.76
   1  -6   7  201.03   11.15
  -1   6  -7  223.22   14.28
  -5  -1  -1  216.61   14.26
  -5  -1  -1  211.05   12.11
   5   1   1  224.60   12.20
  -2  -6   1   32.70    7.65
  -2  -6   1   28.56    3.53
   2   6  -1   30.41    7.08
  -3   3   7  203.89   11.61
   3  -3  -7  223.76   12.74
   3   5  -1   32.96    3.77
  -3  -5   1   22.34    5.41
  -3  -5   1   26.66    4.54
   6  -3  -1    3.60    2.59
   6  -3  -1    6.33   12.81
   6  -3  -1    4.27    1.81
  -6   3   1    3.03    2.46
   2  -6  -4   27.99    6.68
   2  -6  -4   26.95    3.90
  -2   6   4   22.76    4.69
   6  -2  -1  119.67   12.47
  -6   2   1  123.93   12.48
   6  -2  -1   86.36   17.87
   6  -2  -1  119.31   11.77
  -2  -5  -2  163.05   15.51
  -2  -5  -2  168.53   16.42
   2   5   2  163.45   15.24
   4   3   1  294.46   15.91
  -4  -3  -1  313.83   19.54
  -4  -3  -1  318.77   17.40
   3   2  -8  702.16   22.83
   3   2  -8  693.40   23.12
  -3  -2   8  697.07   23.40
   6  -2  -2  661.27   21.98
   6  -2  -2  655.67   21.84
  -6   2   2  635.52   24.12
   6  -2  -2  667.76   32.29
   0  -6   7  873.33   19.87
   0  -6   7  871.47   21.50
   0  -6   7  864.17   20.95
   3  -7  -2  221.04   12.63
   3  -7  -2  201.17   14.25
  -3   7   2  192.79    5.65
  -4   2   7   32.59    6.83
   4  -2  -7   26.37    6.67
   4  -2  -7   29.96    3.97
  -4   2   7   29.54    2.84
  -3   1   8    3.60    1.06
  -3   1   8    4.57    2.96
   3  -1  -8   10.23    2.77
   3  -1  -8   -0.01    1.19
   3  -3   7  104.63   17.90
   3  -3   7  103.32   11.13
  -3   3  -7  121.23   11.80
   5  -6   2    5.42    5.72
  -5   6  -2    1.38    2.42
  -5   6  -2   -0.20    6.55
  -6   3   2    6.77    3.19
   6  -3  -2    2.17    1.85
   6  -3  -2    3.05    1.38
   6  -3  -2    5.77    9.84
   0  -1  -8  851.98   21.33
   0  -1  -8  883.72   25.68
   0   1   8  908.10   24.56
   0   1   8  864.60   19.58
   3  -6  -4  991.88   25.22
   5  -1  -6  463.59   16.85
   5  -1  -6  453.33   15.20
  -5   1   6  462.16   15.88
   5  -1  -6  466.20   15.52
   0  -6  -3  165.57   17.64
   0  -6  -3  166.03   16.36
   0   6   3  170.10   16.27
   1   3   6  202.66   11.61
   1   3   6  213.76   22.60
  -1  -3  -6  213.79   12.38
   4  -7  -1  117.94   16.86
   4  -7  -1  112.67   13.93
  -4   7   1  113.12   14.92
  -6   3   0  276.31   15.62
   6  -3   0  274.41   15.17
   6  -3   0  277.14   25.94
  -4   7  -3  213.69   15.43
  -4   7  -3  233.12   13.89
   4  -7   3  238.32   14.58
  -3   6  -6  463.23   16.27
   3  -6   6  408.35   18.64
   3  -6   6  465.17   15.88
   4   3  -6  187.67   17.58
  -4  -3   6  182.13   17.30
  -4  -3   6  189.51    2.82
   4   3  -6  198.06   10.34
  -2  -3  -5  278.77   15.44
   2   3   5  272.23   14.75
  -5  -2   1 2105.88   55.70
  -5  -2   1 2065.24   46.96
   5   2  -1 2181.77   50.03
   0  -5   8   42.64    7.05
   0  -5   8   44.85    5.66
   0   5  -8   38.02    3.94
   1   4   5  104.48   11.96
  -1  -4  -5  118.83   12.24
  -1  -4  -5  112.74   11.90
  -4  -4   3  183.12   18.02
   4   4  -3  190.57    3.37
  -4  -4   3  181.38   17.09
  -3  -4  -2  691.83   23.86
  -3  -4  -2  770.28   18.53
  -1  -7   3  455.90   16.29
  -1  -7   3  441.09   16.13
   1   7  -3  440.51   15.89
  -5   3  -4  254.97   14.44
   5  -3   4  221.28   27.50
  -3   4  -7  361.51   19.43
   3  -4   7  387.55   13.41
   3  -4   7  399.02   22.41
  -1   0  -8  158.22   19.33
   1   0   8  189.53    3.03
  -1   0  -8  205.93   11.36
   1   0   8  172.47   20.52
  -5  -2   4   21.38    3.70
   5   2  -4   30.85    4.18
  -5  -2   4   27.78    5.23
   5   0  -6    9.67    4.10
  -5   0   6    3.83    1.30
   5   0  -6   10.67    2.34
   5   0  -6   11.18    2.27
   6  -2   0  606.80   32.50
   6  -2   0  580.35   19.79
  -6   2   0  582.78   20.10
   3   5  -5    8.87    2.21
  -3  -5   5   10.96    2.71
  -3  -5   5    9.41    2.67
   2   6  -5  478.94   16.88
  -2  -6   5  465.24   17.03
  -2  -6   5  500.83   17.76
  -2  -5   7   51.91    6.41
  -2  -5   7   52.42    7.45
  -2  -5   7   42.58    4.42
   4   4  -2  118.26   11.66
  -4  -4   2  129.14   16.03
  -4  -4   2  132.64   12.76
  -1  -7   2  514.23   19.77
   1   7  -2  587.55   20.80
  -1  -7   2  549.39   20.52
   4   2  -7  669.29   21.76
  -4  -2   7  671.20   22.88
   4   2  -7  697.15   23.19
   2   2   6  496.55   29.10
  -2  -2  -6  514.53   18.05
   2   2   6  544.17   19.43
  -5   4  -4  220.78   14.82
   5  -4   4  164.90   27.90
   6  -2  -3  389.11   13.51
   6  -2  -3  413.83   13.98
  -6   2   3  379.18   15.17
  -3   2  -7    8.46    2.92
   3  -2   7   -7.51    8.88
   6  -1  -2  556.35   18.75
  -6   1   2  553.37   19.10
  -6   1   2  548.56   20.66
   6  -1  -2  556.66   18.76
   6  -4  -1  740.36   29.20
   6  -4  -1  736.65   17.43
  -6   4   1  747.04   18.93
  -5   2   6    0.55    0.61
   5  -2  -6    1.06    0.68
   5  -2  -6   -1.04    2.72
   5  -2  -6    0.74    1.39
   2   4  -8  499.28   17.23
  -2  -4   8  511.89   19.61
  -2   3  -8 1865.84   42.04
   2  -3   8 1903.44   47.03
   2  -3   8 1944.01   43.16
   1  -7   6  120.85   14.58
   1  -7   6  112.86   13.69
   1  -7   6  101.96   10.43
   4   1   4  111.03   26.11
  -4  -1  -4  140.93   15.33
   2  -8   2   94.34   10.27
   2  -8   2   85.33   12.71
  -2   8  -2   89.85    9.99
  -2   8  -2   86.64   10.78
   1  -5   8  887.67   20.56
  -1   5  -8  883.29   20.87
   1  -5   8  925.24   24.52
   3  -7   5  888.90   21.07
   3  -7   5  967.00   25.67
  -3   7  -5  919.28   25.64
   1   2  -9 1240.68   27.77
  -1  -2   9 1247.78   27.96
  -1  -2   9 1259.35   29.49
   1   2  -9 1218.92   29.23
   6  -1  -1  109.11   12.35
  -6   1   1  115.26   13.95
  -6   1   1  121.85   14.16
  -6   4   0   10.18    3.76
   6  -4   0    0.25   10.83
   1  -7  -2  307.49   16.13
  -1   7   2  300.55   16.09
   1  -7  -2  314.18   17.89
  -5   6   2   97.64   13.42
   5  -6  -2  109.91   12.48
   5  -6  -2  118.52   16.77
   4  -5  -5  854.94   18.82
  -4   5   5  842.84   21.03
   4  -5  -5  830.51   20.44
   4   4  -4   29.06    4.01
  -4  -4   4   28.53    5.38
  -4  -4   4   28.97    8.66
  -2   2   8  131.08   13.46
  -2   2   8  124.08   11.99
   2  -2  -8  110.04   12.81
   2  -2  -8  120.49   11.59
   1   7  -4   33.88    5.92
  -1  -7   4   44.23    8.10
  -1  -7   4   34.21    4.59
  -1  -6  -2  145.20   14.62
   1   6   2  146.96   14.01
  -1  -6  -2  155.71   15.14
  -4   4   6  145.92   14.89
   4  -4  -6  187.81   18.81
  -3  -4   7 1201.52   28.45
   0   7   1   18.73    3.73
   0  -7  -1   19.30    5.35
   0  -7  -1   21.16    3.83
  -1  -1   9    2.37    2.85
  -1  -1   9    5.87    2.21
   1   1  -9    3.58    1.36
   1   1  -9    8.60    5.60
   6  -3  -3  648.08   21.54
   6  -3  -3  679.99   22.44
   6  -3  -3  687.29   32.73
  -6   3   3  675.50   24.16
  -4  -2  -3  148.58   14.77
  -4  -2  -3  162.62   16.50
  -2   6  -7   39.11    5.66
   2  -6   7   42.51    5.32
   2  -6   7   39.50    6.53
   1   2   7   91.10   19.61
  -1  -2  -7  101.64   12.95
   1   2   7   89.94   10.33
   1  -6  -4    0.23    0.66
   1  -6  -4   -1.51    3.52
  -1   6   4    0.05    0.87
   2  -2   8   11.90   11.20
  -2   2  -8   11.28    7.96
   2  -2   8   15.00    2.44
  -2   2  -8   21.86    6.50
  -4   6  -5  653.63   22.58
   4  -6   5  697.95   28.99
   2  -8   3    8.93    7.43
  -2   8  -3    1.05    2.22
   2  -8   3    9.57    3.17
   2  -8   3    2.83    3.32
  -2   8  -1  611.84   22.28
   2  -8   1  583.64   21.59
   2  -8   1  543.30   20.35
   4  -3   6   74.16   18.75
  -4   3  -6   83.69   14.05
  -2  -4  -4   55.30   10.10
  -2  -4  -4   49.92    8.73
   2   4   4   49.16    5.44
  -6   1   3  267.31   15.20
   6  -1  -3  270.13   14.26
   6  -1  -3  267.35   14.42
  -6   1   3  276.73   15.01
  -5   2  -4  174.53   17.03
   5  -2   4  183.69   30.26
   6  -4  -2   48.03    5.50
   6  -4  -2   48.90   15.25
   6  -4  -2   51.67    7.17
  -6   4   2   58.94    9.77
  -6   3  -1    5.07    3.53
   6  -3   1   -2.23   10.61
   5  -4  -5  500.09   20.59
   5  -4  -5  493.04   16.21
   5  -4  -5  527.31   20.63
   5  -4  -5  518.38   17.53
  -2  -6   0   38.54   12.14
  -2  -6   0   36.02    7.78
   2   6   0   26.34    7.02
   0   2  -9   32.14    4.31
   0  -2   9   30.85    5.09
   0  -2   9   33.41    7.31
   0   2  -9   25.69    7.22
   3   5   0 1324.49   30.04
  -3  -5   0 1276.40   30.00
  -3  -5   0 1185.05   29.06
   0  -4  -6  415.23   14.65
   0   4   6  452.47   15.41
   0   4   6  513.77   26.43
   4  -4   6  169.13   25.96
  -4   4  -6  238.90   14.13
   2  -4   8   81.96    8.38
  -2   4  -8   85.95   11.87
   2  -4   8   94.18   14.68
   1  -2  -8    3.90    2.54
  -1   2   8   -1.24    1.46
  -1   2   8    0.79    2.08
   1  -2  -8   -1.25    5.76
  -1  -7   1   92.85   10.38
   1   7  -1   92.66   10.14
  -1  -7   1   88.70   10.18
   1   7  -1   79.18    9.93
  -1  -5   8   16.50    5.45
  -1  -5   8   33.90    5.22
  -4  -4   1    2.44    3.93
  -4  -4   1   -0.48    2.22
   4   4  -1    0.60    1.06
   2  -7   6    6.02    2.02
  -2   7  -6    0.62    2.41
   2  -7   6    1.78    4.03
   5  -5  -4 2106.49   49.92
  -1   8  -2 1209.38   27.79
  -1   8  -2 1224.50   30.07
   1  -8   2 1144.39   32.03
   1  -8   2 1191.25   27.76
   1   3  -9  177.19   16.39
  -1  -3   9  191.89   14.18
  -1  -3   9  170.11   15.75
   1   3  -9  176.23   17.40
   0  -3   9  285.21   15.54
   0  -3   9  335.49   24.06
   0   3  -9  324.56   19.56
   0   3  -9  303.66   16.25
  -5   6  -3   58.10   15.13
   5  -6   3   56.04   13.66
   1  -8   3   96.52   13.24
   1  -8   3   84.65    9.82
  -1   8  -3   85.43   10.35
  -5  -2   0  134.20   13.56
   5   2   0  129.47   18.19
  -5  -2   0  103.46   11.96
   0  -7   6  163.55   17.96
   0  -7   6  177.05   17.01
   0  -7   6  170.01   17.29
  -4   0  -5    2.91    2.03
   4   0   5   -2.56   13.33
   3  -8   2  628.45   21.97
   3  -8   2  645.97   25.22
  -3   8  -2  657.15   23.84
   2   1  -9  336.01   17.71
  -2  -1   9  334.60   17.43
  -2  -1   9  298.10   18.26
   2   1  -9  346.28   18.93
  -1  -6   7  360.96   20.07
  -1  -6   7  353.91   18.85
   6  -1   0  410.77   13.98
  -6   1   0  414.07   15.21
   6  -1   0  440.54   54.95
  -3  -3   8  934.55   22.63
   3   3  -8  917.06   21.00
  -6   4  -1  226.76   13.57
   6  -4   1  257.77   24.06
  -5   5  -4  104.23   11.20
   5  -5   4  112.07   21.67
  -1  -5  -4  135.63   14.38
  -1  -5  -4  125.84   13.37
   1   5   4  129.92   12.49
   3  -5   7  167.74   20.23
   3  -5   7  156.40   14.86
  -3   5  -7  157.13   15.10
   0   3   7    2.57    1.19
   0  -3  -7    5.95    2.59
   0   3   7    2.67    5.59
  -3   8  -1  350.53   19.76
   3  -8   1  417.24   16.58
   3  -8   1  386.15   16.91
   5   1  -6   44.61    6.10
  -5  -1   6   38.37    5.51
   5   1  -6   48.48    5.86
   6  -2   1  527.98   28.95
  -6   2  -1  634.85   22.34
   4  -7  -2  422.58   17.66
   4  -7  -2  468.34   16.15
  -4   7   2  472.21   19.03
   3   2   5  327.89   30.48
  -3  -2  -5  275.77   15.31
   3   2   5  365.10   19.39
  -2  -2   9   68.31    7.09
   2   2  -9   72.43    8.00
   2   2  -9   74.50    8.36
  -2  -2   9   71.70    8.24
  -5  -2   5    0.53    0.83
   5   2  -5    2.16    1.41
  -5  -2   5    0.72    1.16
   5   2  -5    0.86    1.01
   4  -2   6   -5.70   10.04
  -4   2  -6   -0.47    2.92
  -4   7  -4    3.67    3.20
   4  -7   4    8.62    7.77
  -4   6   4  912.49   23.76
   4  -6  -4  890.15   22.66
   4  -6  -4  877.88   19.71
   0   1  -9  114.46   11.46
   0  -1   9  116.17   10.91
   0  -1   9   96.09   11.27
   0   1  -9  101.89   13.34
  -5   0  -3   31.17    7.54
   5   0   3    2.51   13.46
  -3   2   8   63.45    8.11
  -3   2   8   58.72    6.79
   3  -2  -8   92.86   11.77
   3  -2  -8   55.43    6.51
   0  -5  -5   28.43    4.75
   0   5   5   28.24    2.90
   0  -5  -5   35.79    9.22
   2   1   7  131.66   25.87
   2   1   7  104.63   10.78
  -2  -1  -7   86.85    9.67
  -6   2   4    3.86    1.93
   6  -2  -4    9.67    2.35
   6  -2  -4    2.00    1.90
  -6   2   4    9.81    3.23
  -4  -4   5  149.59   16.33
   4   4  -5  135.77   12.57
  -4  -4   5  143.91   13.82
   1  -8   1  668.89   24.61
   1  -8   1  676.89   26.62
  -1   8  -1  697.36   23.77
  -1  -7   5  128.77   15.03
  -1  -7   5  111.89   11.19
   1   7  -5   96.71   10.92
   2  -8   4    0.20    5.00
   2  -8   4   -1.72    2.42
   2  -8   4    1.53    1.13
  -3   1  -7    8.28    3.03
   3  -1   7   12.98   10.18
  -2   8   0  135.52   13.06
   2  -8   0  179.94   17.39
   2  -8   0  174.35   17.84
   1   0  -9   44.83    9.59
  -1   0   9   61.91   11.29
  -1   0   9   55.93    5.87
   1   0  -9   66.47    7.64
  -3  -3  -4 2980.72   66.68
   3   3   4 3015.61   11.15
  -5  -1  -2 2326.26   53.44
  -5  -1  -2 2299.97   52.59
   3  -8   3  210.01   16.73
   3  -8   3  201.91   14.66
   4  -3  -7  314.38   16.19
   4  -3  -7  335.58   18.65
  -4   3   7  299.09   16.72
   5  -3  -6   53.17    8.37
   5  -3  -6   61.81    9.54
   5  -3  -6   66.48    7.07
   6  -1  -4    2.65    1.37
  -6   1   4    0.97    1.49
  -6   1   4    2.17    2.53
   6  -1  -4   -0.35    0.95
  -3  -5   6  389.72   13.01
  -3  -5   6  367.90   19.99
  -6   0   2  197.58   12.61
   6   0  -2  210.02   11.75
  -6   0   2  204.43   11.75
   2   0  -9  247.94   13.50
  -2   0   9  259.36   15.77
   2   0  -9  249.01   15.06
  -2   0   9  257.01   14.06
   1  -8   4   37.98    7.90
   1  -8   4   36.88    7.31
  -2  -6   6  356.63   25.23
  -2  -6   6  362.35   19.01
  -4   5  -6   88.78    9.42
   4  -5   6   67.41   13.04
   6  -4  -3    2.05    6.63
   6  -4  -3    8.78    1.94
   6  -4  -3    6.66    2.62
  -2   1  -8   -3.90    7.30
  -2   1  -8    4.16    2.12
   2  -1   8    4.78    7.91
   6  -5   0  192.00   17.29
  -6   5   0  214.08   12.57
  -6   5   0  204.74   16.77
   2  -7  -3 2871.49   63.51
   2  -7  -3 2596.51   59.10
  -2   7   3 2849.44   63.09
  -4  -3  -2  775.11   18.40
  -4  -3  -2  781.89   22.43
  -6   5   1   -2.22    2.66
  -6   5   1    4.36    5.76
   6  -5  -1   -6.41    7.43
  -3   8   0   77.35    9.48
   3  -8   0   99.87   12.91
   3  -8   0  100.36   11.96
   3  -7  -3  401.60   13.89
   3  -7  -3  406.81   16.72
  -3   7   3  408.78   14.57
   4   0  -8  491.33   16.40
  -4   0   8  474.10   16.58
  -4   0   8  495.80   17.30
   4   0  -8  496.29   16.62
  -6   0   3  185.66   18.77
  -6   0   3  183.31   17.48
   6   0  -3   95.06    9.34
  -3  -1  -6   70.63    8.83
   3   1   6   70.27    8.10
   3   1   6   97.56   27.21
   6  -3  -4  951.32   21.37
   6  -3  -4  930.85   24.51
   5  -6  -3  295.26   16.71
   5  -6  -3  287.08   18.65
  -5   6   3  272.20   17.79
  -6   0   1  706.51   24.35
   6   0  -1  706.81   23.44
  -6   0   1  676.18   23.97
   2  -5  -6  363.03   20.21
  -2   5   6  356.84   18.34
  -2   5   6  392.22   17.24
   0  -4   9 1219.43   27.19
   0  -4   9 1268.90   31.05
   0   4  -9 1252.06   28.42
   2  -5   8   55.84    7.42
  -2   5  -8   54.09    7.11
   2  -5   8   31.82    6.16
   1   7   0    8.31    2.55
  -1  -7   0    8.35    3.54
  -1  -7   0   10.88    2.94
  -5   1  -4  276.44   15.22
   5  -1   4  251.91   34.26
   2  -4  -7    2.24    3.01
   4   1  -8    0.18    0.50
  -4  -1   8    0.66    1.56
   4   1  -8    3.00    1.25
   4   1  -8    3.69    2.36
   5  -7   1   28.01   10.85
  -5   7  -1   29.09    9.61
   5  -7   1   22.19    9.08
  -6   3  -2 1085.39   25.73
   6  -3   2 1085.38   37.82
   3  -5  -6   24.13    4.77
  -2  -3   9   98.44   13.58
   2   3  -9   91.58   10.95
   5  -7   0  113.60   16.75
   5  -7   0   96.88   13.40
  -5   7   0  110.09   14.40
  -4  -3   7   86.59   10.22
   4   3  -7   78.68   10.25
  -6   5  -1   85.85   12.05
   6  -5   1   74.32   14.67
  -4   1   8    9.96    4.00
  -4   1   8    2.77    1.10
   4  -1  -8   12.55    4.06
  -1   3  -9  630.92   21.70
   1  -3   9  730.78   25.96
   1  -3   9  690.87   23.39
  -2  -5  -3   32.53    4.62
   2   5   3   26.08    3.99
  -2  -5  -3   30.75    9.09
  -1  -4   9   45.03    5.12
   1   4  -9   39.32    3.60
  -1  -4   9   47.41   16.69
  -1  -1  -8   13.96   10.25
  -1  -1  -8    9.22    2.99
   1   1   8    6.02    5.96
   6  -4   2  890.89   31.31
  -6   4  -2  855.64   20.45
   6  -1   1  377.53   33.70
  -6   1  -1  402.39   14.61
   6  -5  -2   61.25   14.80
   6  -5  -2   67.86    8.33
   1  -2   9  708.56   23.72
  -1   2  -9  721.86   17.40
  -1   2  -9  766.44   22.87
   1  -2   9  757.71   22.60
   0   2   8   53.63    7.01
   0  -2  -8   41.72    3.44
   0   2   8   46.54   10.85
   1  -8   0  866.56   20.56
  -1   8   0  897.40   20.56
   1  -8   0  879.91   22.57
  -3   4   7  482.85   17.01
   3  -4  -7  509.43   17.63
   3  -8   4  433.18   20.84
   3  -8   4  448.38   18.52
  -2  -6  -1   22.06    5.47
  -2  -6  -1   19.47    5.73
  -3  -5  -1  321.68   17.58
  -3  -5  -1  309.39   16.98
  -5   7  -2    1.36    2.18
   5  -7   2   -3.36    3.88
  -5   7  -2   -3.81    5.46
   0   0  -9   34.98    9.89
   0   0   9   26.88    5.16
   0   0   9   31.21    6.64
   0   0  -9   35.27    4.84
  -5  -3   3   18.25    4.25
   5   3  -3   26.02    4.58
  -5  -3   3   25.65    4.40
  -5  -2  -1   18.27    4.17
  -5  -2  -1   18.49    5.51
   5  -1  -7   46.56    6.59
  -5   1   7   53.22    5.90
   5  -1  -7   41.32    3.70
   5  -1  -7   41.30    5.03
   6   0  -4  113.86   10.89
  -6   0   4  110.40   11.75
   6   0  -4  110.54   10.51
  -6   0   4  114.78   12.27
   0   7   2   91.00    9.65
   0  -7  -2   94.59   11.03
   0  -7  -2  101.32   11.17
   0  -8   3  235.10   17.34
   0  -8   3  243.14   17.30
   0   8  -3  225.15   13.35
   3  -7   6  337.71   17.83
   3  -7   6  363.69   23.19
  -3   7  -6  349.58   19.34
   0   6  -8  249.41   14.84
   0  -6   8  254.89   13.56
   0  -6   8  279.91   22.47
   4  -1   6  285.59   28.97
  -4   1  -6  311.37   18.26
   1  -6   8  892.26   31.83
   1  -6   8  933.33   21.34
  -1   6  -8  917.44   21.27
   5   0  -7   46.20    6.81
   5   0  -7   42.10    5.67
  -5   0   7   41.94    4.87
   5   0  -7   37.06    5.28
  -3  -4  -3  112.55   11.91
  -3  -4  -3   96.76   10.74
   5   3  -2    8.46    1.97
  -5  -3   2    9.18    2.70
  -5  -3   2   18.14    4.66
   6  -2   2   17.32   20.25
  -6   2  -2    5.14    2.58
   0  -8   2  120.53   13.11
   0  -8   2   98.23   10.77
   0   8  -2   96.88   11.04
   5  -6   4  456.44   24.37
  -5   6  -4  475.36   18.53
   1  -7   7   54.94    8.10
   1  -7   7   43.19    5.40
   5  -7  -1   -0.75    2.59
  -5   7   1    1.03    4.92
   5  -7  -1   -0.72    6.90
   2  -6  -5 1407.08   34.81
  -2   6   5 1418.29   31.36
   3   1  -9   98.38   11.33
  -3  -1   9  112.19   10.77
   3   1  -9  128.15   12.06
  -3  -1   9  118.84   12.56
   2  -8   5  155.98   14.70
   2  -8   5  175.77   19.70
   2  -8   5  154.63   15.85
   1  -8   5   85.18   10.17
   1  -8   5   97.34   12.17
   1  -8   5   85.55   10.28
   3  -6  -5  809.41   18.08
   3  -6  -5  800.70   19.93
  -6   0   0   64.32    8.35
  -6   0   0   69.57    8.61
  -2   8   1  564.94   20.00
   2  -8  -1  522.01   20.06
   2  -8  -1  567.40   20.64
   4  -8   1   45.96    9.85
   4  -8   1   35.82    8.86
  -4   8  -1   33.41    6.90
   0   6   4   33.43    5.59
   0  -6  -4   39.09    3.92
   0  -6  -4   38.25   10.70
   5  -4   5   -3.45    9.49
  -5   4  -5    1.00    1.19
  -1   7   3   72.69    7.86
   1  -7  -3   77.34    8.54
   1  -7  -3   71.26   12.94
  -4  -4   6   88.42   10.01
   4   4  -6   87.28    9.00
  -4  -4   6   84.29    9.28
   1  -4   9 2302.72   54.12
   1  -4   9 2442.83   54.16
  -1   4  -9 2329.47   52.58
  -5  -2   6   27.26    4.08
  -5  -2   6   34.64    3.99
   5   2  -6   31.37    2.89
   3  -6   7 1121.77   25.23
   3  -6   7 1041.74   27.30
  -3   6  -7 1102.48   26.95
   5  -3   5   39.26   16.07
  -5   3  -5   24.12    8.48
   1  -4  -7  531.60   18.20
  -1   4   7  522.89   17.20
  -1   4   7  545.22   22.27
  -2  -5   8   15.08    3.65
  -2  -5   8   18.57    2.35
   3  -8  -1 1043.28   24.45
  -3   8   1  991.07   23.35
   3  -8  -1  980.39   24.28
   4  -8   2   54.67   14.37
   4  -8   2   36.50    9.56
  -4   8  -2   27.17    6.15
  -1  -7   6  228.78   17.13
  -1  -7   6  275.54   15.11
  -1  -7   6  271.63   14.50
  -2   1   9  249.15   13.43
   2  -1  -9  200.68   13.74
   2  -1  -9  237.80   14.09
  -2   1   9  233.31   14.29
  -1   5   6    4.40    1.09
   1  -5  -6    1.49    2.13
   5   3  -4   53.62    5.74
  -5  -3   4   56.16    8.76
  -5  -3   4   60.65    7.39
  -3   0   9  176.41   17.10
  -3   0   9  166.09   15.63
   3   0  -9  188.84   17.57
   3   0  -9  136.06   12.91
   6  -2  -5   56.24    6.03
  -6   2   5   59.89    7.55
   6  -2  -5   44.39    8.94
   6  -2  -5   48.25    6.28
   0  -8   4   95.10   11.10
   0  -8   4   98.81   11.98
   0   8  -4   84.54   10.16
  -4   7   3 1839.84   42.11
   4  -7  -3 1801.73   42.19
   4  -7  -3 1869.33   41.45
  -2   3   8  206.41   10.93
  -2   3   8  159.79   15.14
   2  -3  -8  195.88   11.07
  -2   3   8  179.02   16.86
   6  -1  -5  314.49   16.50
  -6   1   5  318.86   17.61
  -6   1   5  309.83   16.36
   6  -1  -5  305.70   15.95
  -1  -6  -3  367.69   20.06
  -1  -6  -3  350.69   18.77
   1   6   3  400.34   14.28
   4   2  -8  167.96   15.58
  -4  -2   8  135.05   12.87
   6  -4  -4  189.92    2.76
   6  -4  -4  182.24   20.55
   6  -4  -4  179.57   19.36
   6  -4  -4  178.05   16.61
   1  -1  -9   -1.36    3.46
   1  -1  -9    5.23    2.89
  -1   1   9    3.80    2.11
  -1   1   9    1.63    2.74
   4  -7   5  255.91   16.67
  -4   7  -5  279.44   17.61
   6  -5   2    3.41    8.12
  -6   5  -2    4.16    3.38
   5  -2  -7  512.18   17.32
   5  -2  -7  501.41   16.57
   5  -2  -7  496.54   17.43
  -5   2   7  523.50   17.64
   0  -7   7  114.13   12.32
   0  -7   7  154.96   16.30
   0  -7   7  126.64   11.98
  -1   1  -9  477.55   17.41
   1  -1   9  480.42   20.05
  -1   1  -9  491.83   21.99
   1  -1   9  473.02   15.83
  -4   6  -6  574.89   20.17
   4  -6   6  556.94   23.46
  -4   8   0  216.28   13.30
   4  -8   0  286.76   19.62
  -3  -4   8  223.49   13.01
   5  -5  -5   65.44    7.34
   5  -5  -5  109.21   12.27
  -3  -2   9  437.91   15.83
  -3  -2   9  475.10   16.41
   3   2  -9  461.90   15.85
   3   2  -9  483.94   15.88
  -3  -6   3    7.96    3.34
   3   6  -3   14.68    3.76
  -3  -6   3   25.32    6.69
   0  -8   1   32.57    5.81
   0  -8   1   41.09    3.56
  -5  -3   1  722.14   26.85
   5   3  -1  790.98   18.13
  -5  -3   1  812.89   19.29
  -4   2   8   42.08    6.31
   4  -2  -8   49.58    9.48
  -4   2   8   43.91    4.69
   4  -2  -8   46.97    6.40
   3   0   7  122.71   21.30
  -3   0  -7  153.18   14.81
  -2   0  -8  274.18   18.48
   2   0   8  369.89   27.60
  -2   0  -8  311.42   16.61
   6  -5  -3  722.23   16.87
   6  -5  -3  725.16   20.00
   6  -5  -3  702.39   25.83
   2  -7   7  226.48   15.19
   2  -7   7  224.27   12.03
  -2   7  -7  240.10   14.60
   5  -4  -6  435.01   16.19
  -5   4   6  376.24   14.29
   5  -4  -6  426.25   14.18
   5  -4  -6  466.07   18.55
   5   1  -7  422.67   14.29
  -5  -1   7  408.06   14.05
   5   1  -7  409.88   13.77
   5  -5   5   74.73   15.06
  -5   5  -5   93.91   11.74
  -5   7  -3   77.51   10.13
   5  -7   3   70.79   10.97
   4  -8   3  190.83   12.10
   4  -8   3  198.47   12.04
   4  -5  -6  333.08   18.53
  -4  -2  -4   21.21    7.57
   4   2   4   18.98   12.91
  -3  -6   4  741.92   17.27
  -3  -6   4  723.47   18.45
   3   6  -4  705.59   23.65
  -3   3   8   27.47    4.52
   3  -3  -8   36.37    4.94
  -3  -5   7    0.07    0.14
  -3  -5   7    4.50    3.27
  -3  -5   7    3.51    1.21
   0  -5   9  743.19   27.23
   0  -5   9  734.86   16.75
   0   5  -9  728.60   16.94
  -3  -6   2  535.19   18.87
   3   6  -2  562.24   19.07
  -3  -6   2  544.40   18.57
  -2  -6   7  868.29   19.48
  -2  -6   7  836.15   20.06
  -2  -6   7  871.63   19.84
   5  -2   5    7.44   10.38
  -5   2  -5   28.27   10.02
  -6   6   0    1.74    1.77
  -6   6   0   -1.44    6.55
   6  -6   0    5.16    6.77
  -6  -1   2  156.79   15.61
   6   1  -2  164.13   15.73
  -6  -1   2  172.76   17.80
  -4  -1  -5  347.76   19.49
   4   1   5  300.38   29.32
   6  -3  -5  254.36   14.85
   6  -3  -5  280.03   19.34
   6  -3  -5  246.45   12.85
   6  -3  -5  277.93   20.59
   6   1  -3 1773.95   39.48
  -6  -1   3 1810.55   40.99
  -6  -1   3 1774.69   42.70
   1   7   1   13.93    2.52
  -1  -7  -1   22.29    6.21
  -1  -7  -1   13.66    4.19
   2   7  -3    5.66    2.93
  -2  -7   3    9.82    4.19
  -2  -7   3   12.64    3.53
   1  -3  -8    0.11    2.01
  -1   3   8   -0.13    0.52
  -1   3   8    3.35    3.87
  -2  -4   9  943.11   20.92
  -2  -4   9  920.08   22.68
  -4  -4  -1  175.20   20.34
  -4  -4  -1  109.76   12.06
  -1  -6   8 2909.72   72.94
  -1  -6   8 2625.54   58.19
  -1  -6   8 2918.17   65.00
   3  -3   8   -0.66    6.35
  -3   3  -8    3.32    2.30
  -2  -3  -6  124.52   13.22
   2   3   6   61.95   13.37
   2   3   6  107.96    5.95
   6   0  -5  299.60   16.46
  -6   0   5  345.27   19.16
   6   0  -5  353.63   18.48
  -6   0   5  344.29   18.38
  -5   7   2   35.10    7.19
   5  -7  -2   17.59    3.34
   5  -7  -2   50.25   13.85
  -1  -4  -6  378.83   13.76
   1   4   6  395.89   13.40
   1   4   6  426.30   26.15
   5   3  -5  189.88    2.54
  -5  -3   5  185.56   17.92
  -5  -3   5  192.43    3.44
   2  -6   8   13.11    2.34
  -2   6  -8   17.07    4.58
   2  -6   8   12.27    4.89
  -6   6   1  378.10   19.60
   6  -6  -1  335.34   22.39
   1  -6  -5 1289.31   28.72
  -1   6   5 1264.13   28.06
   1  -6  -5 1246.27   29.53
  -1   8   1  716.15    5.91
   1  -8  -1  684.60   24.28
   1  -8  -1  706.80   25.16
  -5  -1  -3 1381.74   34.25
  -3   4  -8  596.17   23.18
   3  -4   8  640.04   28.64
   5  -6  -4  396.29   14.06
   5  -6  -4  374.80   15.49
   3  -1  -9    8.80    2.75
   3  -1  -9    2.61    2.23
  -3   1   9    6.50    2.50
  -3   1   9    9.10    2.66
   4  -4  -7  445.64   16.20
  -4   4   7  410.29   17.80
  -2  -7   4   23.92    5.92
  -2  -7   4   31.65    6.35
   2   7  -4   26.78    4.10
   6  -6   1  324.12   24.14
  -6   6  -1  383.49   25.14
   3  -8   5   22.14    8.18
   0  -8   5  142.22   14.09
   0  -8   5  147.10   19.01
  -6   4  -3    6.74    4.07
   6  -4   3    5.21   14.23
   6  -1   2  961.90   41.38
  -6   1  -2  954.19   24.74
   4  -6  -5  361.85   25.24
  -4   6   5  306.29   19.63
   6  -3   3   33.10   16.96
  -6   3  -3   39.09    9.49
  -2  -7   2   25.32    4.35
  -2  -7   2   30.26    6.93
   2   7  -2   22.13    3.30
  -1  -3  -7    6.09    3.93
   1   3   7    1.58    1.36
   1   3   7   -1.00    7.47
   5   0   4  588.94   32.07
  -5   0  -4  655.29   24.51
   2   4   5   43.53   10.78
  -2  -4  -5   55.88    9.53
  -6   0  -1  150.38   14.67
   6   1  -1  925.88   28.62
  -6  -1   1  928.34   29.80
  -6  -1   1  884.81   31.68
  -4  -5   3  705.48   25.75
   4   5  -3  682.16   24.70
  -4  -5   3  604.29   22.98
  -1   5  -9  789.01    6.85
   1  -5   9  796.77   24.73
   1  -5   9  812.23   32.52
   4  -8  -1  339.05   24.11
   4  -8  -1  338.55   21.34
  -4   8   1  247.14   16.84
   4  -4   7 1571.12   53.12
  -4   4  -7 1629.22   52.57
  -6  -1   4   -0.98    2.45
  -6  -1   4    0.93    1.25
   6   1  -4    1.40    1.17
   1   5  -9  427.38   15.99
  -1  -5   9  418.04   22.59
  -1  -5   9  405.18   14.84
   3   6  -5  429.31   16.14
  -3  -6   5  440.52   16.38
  -4   3  -7  286.44   18.95
   4  -3   7  272.54   25.16
   3  -7  -4  785.87    3.22
   3  -7  -4  820.96   26.57
  -4  -3  -3   84.32   11.20
  -4  -3  -3  111.61   14.51
  -4  -5   4 1253.57   43.36
   4   5  -4 1270.66   38.87
  -4  -5   4 1244.05   38.17
   2   2   7  196.66   24.69
  -2  -2  -7  191.98   17.17
   2   2   7  207.60   14.11
   1  -8   6  115.16   16.06
   1  -8   6  122.39   12.93
   1  -8   6  112.65   14.42
   2  -7  -4  733.11   28.20
   2  -7  -4  720.03   26.02
  -2   7   4  723.24   26.06
  -3   2  -8  462.98   17.48
   3  -2   8  450.59   24.74
  -3  -6   1    3.87    2.66
   3   6  -1    3.21    1.83
  -3  -6   1    5.34    3.25
  -4  -5   2  150.18   13.44
   4   5  -2  128.56   12.85
  -4  -5   2  116.01   15.41
   3   3  -9  571.89   21.04
  -3  -3   9  574.42   22.75
   0   8   0    2.84    1.40
   0  -8   0    2.31    1.68
   0  -8   0    4.13    3.83
   0  -1  -9   26.78    7.01
   0   1   9   23.51    7.48
   0  -1  -9   13.40    5.35
  -5  -3   0 2712.51   85.81
  -5  -3   0 2565.91   82.25
  -3   8   2 1609.81   49.49
   3  -8  -2 1598.91   50.79
   3  -8  -2 1540.22   47.14
  -1  -5  -5  532.72   20.71
  -1  -5  -5  558.89   20.91
   1   5   5  568.18   20.78
   5  -3  -7   19.75    6.11
   5  -3  -7   20.18    2.32
  -5   3   7   18.17    6.68
   2  -8   6 1133.26   34.79
   2  -8   6 1196.94   39.96
   2  -8   6 1138.41   36.94
  -5  -2  -2 1799.81   56.94
  -5  -2  -2 2008.05   67.50
   2  -8  -2  268.89   18.04
   2  -8  -2  273.29   17.88
  -2   8   2  269.64   17.52
   6  -6  -2  416.57   18.61
  -6   6   2  392.04   27.75
   6  -6  -2  416.39   20.65
   2  -3   9   47.91   13.39
   2  -3   9   73.99   10.55
  -2   3  -9   83.43   11.50
   4  -8   4   87.27   12.80
  -4   0  -6   69.65   10.30
   4   0   6   40.10   20.04
  -6   5  -3    1.34    2.55
   6  -5   3   12.02   10.06
   2   7  -5  382.22   24.34
  -2  -7   5  395.10   30.50
  -2  -7   5  405.79   15.19
  -2  -6  -2   62.68    8.70
  -2  -6  -2   67.65   13.95
  -3  -5  -2    3.09    2.46
  -3  -5  -2    1.07    1.60
   3  -5   8   10.46    5.66
  -3   5  -8   14.76    5.21
  -6   2  -3   90.05   13.16
   6  -2   3   44.25   21.85
   6  -6   2  244.39   20.53
  -6   6  -2  244.82   16.89
  -1   0  -9   27.77    6.61
   1   0   9   14.06    7.62
  -1   0  -9   16.33    8.21
  -4  -4   7   34.63    8.25
  -4  -3   8   -0.35    2.42
  -2  -7   1  546.77   21.56
  -2  -7   1  559.38   21.74
  -1  -2  10  260.52   16.75
  -1  -2  10  258.88   17.54
   1   2 -10  245.49   17.20
   1   2 -10  248.31   15.46
  -1  -7   7   46.75   10.66
  -1  -7   7   45.35    9.95
  -1  -7   7   49.64   11.53
  -4   5  -7  831.60   26.40
   4  -5   7  838.93   30.40
   0   4   7   55.94    9.91
   0   4   7   86.92   11.55
   0  -4  -7  101.69   15.11
   5  -6   5 1015.43   36.43
  -5   6  -5  944.37   30.23
   2  -4   9   18.85    7.56
   2  -4   9   16.59    5.45
  -2   4  -9   25.97    8.99
   2  -2  -9    3.10    4.87
  -2   2   9    2.12    1.08
   2  -2  -9   10.61    4.97
  -2   2   9   10.01    3.80
  -3  -3  -5   87.92   16.50
   5   2  -7    1.02    1.01
  -5  -2   7    4.19    2.15
   5   2  -7    2.02    0.84
   3   2   6  569.61   33.16
  -3  -2  -6  553.13   20.86
   5  -7   4   57.67   12.20
  -5   7  -4   63.90   14.20
   6  -1  -6  405.05   15.03
  -6   1   6  410.20   16.56
   6  -1  -6  405.50   15.04
   6  -1  -6  377.08   24.48
   6  -5  -4  323.62   23.04
   6  -5  -4  312.40   21.53
   6  -5  -4  311.33   19.24
   6  -4  -5  860.51   26.87
   6  -4  -5  905.77   29.99
   6  -4  -5  862.91   29.70
   6  -4  -5  821.33   25.43
  -4   2  -7  360.68   22.99
   4  -2   7  371.88   33.24
  -1  -2  -8    0.15    0.95
   1   2   8   -0.05    6.02
   2  -2   9   15.93    7.25
  -2   2  -9   18.62    5.21
   4   5  -5   36.60    9.61
  -4  -5   5   39.82    8.79
  -4  -5   5   43.88   10.15
  -5   1  -5   15.21    5.60
   5  -1   5    8.14   11.30
   0   5   6  582.81   21.92
   0  -5  -6  578.89   21.90
   0   7   3  436.88   16.06
   0  -7  -3  419.81   17.16
   0  -7  -3  440.82   17.42
   6  -2  -6  171.86   14.82
   6  -2  -6  162.16   15.64
  -6   2   6  168.54   14.87
   6  -2  -6  176.65   15.04
  -6  -1   0 1225.72   44.69
  -6  -1   0 1283.31   39.94
   1   1 -10  113.47   14.54
  -1  -1  10  110.25   14.50
  -1  -1  10  125.21   12.78
   1   1 -10  123.94   13.24
   4  -3  -8 1694.15   52.19
  -4   3   8 1767.17   54.40
   1   3 -10  193.91   17.49
  -1  -3  10  223.56   19.03
  -1  -3  10  205.96   12.93
   1   3 -10  202.70    3.66
  -5  -3   6   56.19    8.08
   5   3  -6   49.14   10.82
  -5  -3   6   52.16   11.40
  -4  -5   1  968.38   31.44
   4   5  -1  980.30   30.06
  -4  -5   1  973.19   32.12
   3  -7   7   59.33    9.50
  -3   7  -7   76.99   13.24
  -2  -5  -4  131.17   13.22
   2   5   4  129.01   11.96
  -2  -5  -4  131.92   11.86
   6   1  -5   59.06    8.51
  -6  -1   5   61.17   10.33
  -6  -1   5   61.17    8.29
   1   8  -3  107.89   15.01
  -1  -8   3   97.45   13.93
  -1  -8   3   99.24   13.47
  -4   7   4  120.27   11.83
   4  -7  -4  143.00   12.62
   4  -7  -4  142.89   14.77
   0  -8   6 1309.40   40.83
   0  -8   6 1242.59   39.32
   0  -8   6 1309.02   40.64
   0  -2  10  101.26   12.93
   0  -2  10   93.20   17.10
   0   2 -10   81.72   12.96
   0   2 -10  108.88   14.87
   1  -2  -9    8.07    3.60
  -1   2   9    0.70    2.08
   1  -2  -9    9.13    7.97
   0  -3  10  135.74   16.96
   0  -3  10  120.85   10.43
   0   3 -10  124.16   11.70
  -5   7   3  247.28   17.96
   5  -7  -3  234.08   15.04
   5  -7  -3  273.67   21.49
   4   0  -9  535.95   19.41
  -4   0   9  538.93   20.26
   4   0  -9  545.50   19.84
  -4   0   9  577.14   21.00
   2   2 -10  262.28   17.04
  -2  -2  10  283.02   17.46
  -2  -2  10  287.66   20.51
   2   2 -10  314.81   19.59
  -4   7  -6   45.40   12.16
   4  -7   6   32.11   10.31
  -2  -1  10    5.03    1.98
   2   1 -10    8.04    2.32
  -2  -1  10    3.02    1.69
   2   1 -10    6.18    3.86
   2  -9   2    7.64    5.78
   2  -9   2   13.96    5.72
  -3  -6   6   34.59    8.56
   3   6  -6   36.55    8.44
  -3  -6   6   34.01    8.05
   1   8  -4    2.26    3.35
  -1  -8   4    4.71    3.13
  -1  -8   4    3.62    3.66
   3  -2  -9  204.87    7.37
  -3   2   9  217.20   14.21
   3  -2  -9  242.96   16.29
  -1   7  -8   -0.41    1.55
   1  -7   8    2.04    2.11
   1  -7   8    2.10    0.77
   0   3   8  164.09   18.74
   0  -3  -8  169.39   15.95
   0   3   8  160.96   13.75
   4   1  -9  364.81   22.57
  -4  -1   9  396.05   24.92
   4   1  -9  382.06   23.69
   2  -9   3    6.07    3.34
   2  -9   3    0.52    4.33
   6   0  -6    0.72    0.95
  -6   0   6    3.22    2.25
   6   0  -6    4.55    1.76
  -1  -8   2   91.33   12.51
   1   8  -2   77.52   11.34
  -1  -8   2   90.64   12.70
   5  -8   1   57.74   11.33
  -5   8  -1   31.54    9.08
   5  -8   1   46.97   11.55
   4  -8  -2    0.70    4.99
   4  -8  -2    3.87    1.62
  -4   8   2    4.73    3.12
   5   0  -8   63.48    8.81
   5   0  -8   51.07   11.72
   5   0  -8   51.72   11.41
  -5   0   8   54.82   12.03
   1  -7  -4  213.63   13.46
   1  -7  -4  184.75   17.27
  -1   7   4  205.08    3.15
  -3  -4  -4  116.89    5.55
  -3  -4  -4  150.61   15.16
   5  -1  -8   69.63   10.09
   5  -1  -8   72.93    9.67
  -5   1   8   81.83   10.54
   5  -1  -8   85.15   11.33
   3  -1   8  207.96   23.09
  -3   1  -8  286.42   18.43
  -3  -6   0   34.92   10.09
  -3  -6   0   29.37    7.57
   3  -9   2    3.40    4.75
   3  -9   2    2.87    2.15
   2   1   8   22.83    9.39
  -2  -1  -8   40.10    9.56
   2   1   8   41.00    8.99
   2  -5  -7    3.61    3.34
  -2   5   7    1.98    3.17
   3  -5  -7 1225.08   37.97
  -5   8   0  155.47   15.10
   5  -8   0  174.74   16.08
   5  -8   0  181.70   20.36
   0  -7   8  109.31   15.24
   0  -7   8  103.22   13.13
   0  -7   8   93.38   12.92
   6  -6  -3  146.77   16.57
   6  -6  -3   91.34   13.31
   1  -8  -2   45.94   10.19
  -1   8   2   52.05   13.03
   1  -8  -2   52.59   13.65
   2  -5   9  274.85   18.00
  -2   5  -9  270.70   18.16
   2  -5   9  256.76   18.52
  -5   4  -6  196.53   18.71
   5  -4   6  109.83   20.33
   5  -8   2  120.06   16.39
   5  -8   2   66.78   10.20
  -1  -7  -2   38.43   10.96
  -1  -7  -2   34.64   10.62
   1   7   2   30.50    6.93
  -3   8  -6   76.87   11.75
   3  -8   6   73.20   13.70
   2   7  -6    7.06    2.95
  -2  -7   6    3.52    1.73
  -2  -7   6    6.86    3.66
  -3  -1  -7  154.28   16.58
   3   1   7  102.04   19.82
  -4  -4  -2  549.98   20.72
  -4  -4  -2  494.16   23.21
   2  -9   1   13.95    7.35
   2  -9   1   17.68    5.99
  -2   9  -1   13.91    4.78
   6  -3  -6   26.62    7.99
   6  -3  -6   17.28    7.12
   6  -3  -6   28.58    6.25
   0   6  -9 1396.15   45.15
   0  -6   9 1460.55   47.04
   0  -6   9 1391.25   42.47
   6   0   2   84.08   26.03
  -6   0  -2   91.82   13.95
  -2  -5   9  833.60   25.32
  -2  -5   9  866.21   30.94
  -3  -5   8  411.22   20.80
   5  -5  -6   46.90   11.96
   5  -5  -6   45.50    9.78
   5  -5  -6   16.78    4.10
   6  -6   3   42.40   13.44
  -6   6  -3   71.69   10.85
   4  -1  -9  109.55   13.98
   4  -1  -9   92.94   12.06
  -4   1   9  102.29   13.17
  -4   1   9  102.48   13.88
  -3   9  -1 2734.00   83.53
   3  -9   1 2623.48   81.25
   3  -9   1 2346.27   82.74
   3  -9   3    3.69    2.41
   3  -9   3    4.37    7.22
   0   1 -10  401.10   16.38
   0  -1  10  390.70   24.13
   0  -1  10  435.85   18.21
   0   1 -10  400.88   20.08
  -2  -6   8  823.66   26.68
  -2  -6   8  843.05   25.89
   5  -3   6 2719.43   88.33
  -5   3  -6 2695.43   82.48
  -1  -6  -4  123.81   12.48
  -1  -6  -4  121.54   11.06
   1   6   4  126.28   11.08
   3  -6  -6 1511.33   47.50
  -2  -7   0   27.84    7.15
  -2  -7   0   23.25    6.61
   0   8   1    6.32    3.23
   0  -8  -1   10.44    5.40
   0  -8  -1    7.20    3.09
  -7   3   1  290.97   19.95
   7  -3  -1  259.34   26.67
   6  -4   4  302.54   29.71
  -6   4  -4  284.39   18.79
   2   3 -10  591.05   21.97
   2   3 -10  585.62   21.22
  -2  -3  10  607.33   24.66
  -2  -3  10  596.76   21.43
   1  -6   9  937.64   29.35
  -1   6  -9  899.85   28.04
   1  -6   9  970.01   40.50
   0   4 -10  520.58   19.12
   0  -4  10  518.75   18.75
   0  -4  10  559.49   25.85
   6  -1   3  751.80   37.10
  -6   1  -3  846.67   26.86
   2  -9   4 1703.49   54.83
   2  -9   4 1600.82   49.53
   0  -6  -5    8.18    4.05
   0  -6  -5    9.00    2.79
   0   6   5    4.32    1.42
  -7   3   2  161.21   14.61
   7  -3  -2  172.78   25.81
  -5  -3  -1   -0.39    3.20
  -5  -3  -1    1.97    2.38
  -2   0  10  380.48   23.53
  -2   0  10  429.47   18.75
   2   0 -10  394.98   24.93
   2   0 -10  394.64   25.91
  -5  -4   3  847.49   27.98
  -5  -4   3  810.55   25.48
   5   4  -3  820.45   25.79
  -6  -2   3   11.77    3.50
   6   2  -3    7.41    3.37
  -6  -2   3    6.07    3.35
   3  -6   8  910.16   30.74
  -3   6  -8 1065.48   33.60
   1   0 -10   40.32    9.14
  -1   0  10   38.19    8.51
  -1   0  10   25.19    6.02
   1   0 -10   26.69    7.34
   4  -6   7   11.91    7.10
  -4   6  -7   54.28   12.79
   5   1  -8   11.56    3.81
  -5  -1   8   13.34    4.57
   5   1  -8   11.25    3.28
   5   1  -8   14.95    3.92
   2  -1   9   80.29   18.31
  -2   1  -9   56.05    7.35
   2  -6  -6    8.00    4.81
  -2   4   8  437.08   15.63
   2  -4  -8  438.04   17.97
  -2   4   8  407.56   15.34
   1  -9   3  114.15   15.79
   1  -9   3  121.03   12.85
   6  -7   0  238.38   19.86
   6  -7   0  255.84   20.14
  -6   7   0  269.01   22.14
   4  -8   5  232.01   17.12
  -4   8  -5  248.07   16.64
  -1  -8   5   71.53   10.88
  -1  -8   5   66.18    9.05
   1   8  -5   43.16   10.19
  -1  -4  10  682.46   24.77
  -1  -4  10  708.11   36.59
   1   4 -10  660.32   23.94
  -4  -5   6  150.07   13.45
   4   5  -6  143.16   12.29
  -4  -5   6  138.38   12.43
  -6   3  -4  182.63   16.42
   6  -3   4  210.44   25.53
   6   2  -2 2965.37   10.10
  -6  -2   2 2902.22   39.95
   5  -5   6    6.77    8.82
  -5   5  -6    9.26    5.04
   5  -6  -5  367.53   22.58
   5  -6  -5  348.37   21.61
   5  -6  -5  349.45   23.02
   1  -9   2   16.51    6.61
   1  -9   2   29.37    9.21
  -3  -4   9    4.02    2.70
  -7   2   2   77.37   13.08
   7  -2  -2   78.85   19.73
  -6   7  -1  671.18   28.21
   6  -7   1  596.14   25.15
  -1  -8   1  288.11   18.50
  -1  -8   1  262.27   16.72
   4   2  -9  445.34   16.42
  -4  -2   9  455.25   18.50
  -5  -4   4   88.72   11.85
   5   4  -4  122.04   10.56
  -5  -4   4  124.68   10.95
   2  -7   8  662.45   32.76
   2  -7   8  702.53   25.93
  -2   7  -8  664.00   25.75
   3  -4  -8  836.62   26.11
  -7   4   1   29.22   11.24
   7  -4  -1   12.62   11.56
   5   4  -2   43.79   10.62
  -5  -4   2   55.97    5.36
  -5  -4   2   55.31   16.16
   7  -2  -1   80.78   17.10
  -7   2   1  119.59   11.38
   1  -8   7  148.20   14.27
   1  -8   7  206.56   13.16
   1  -8   7  199.80   19.43
   4  -1   7 1621.38   56.57
  -4   1  -7 1550.31   47.93
   5  -2  -8   16.42    5.21
  -5   2   8    2.65    3.18
   5  -2  -8   11.33    3.80
  -5   2   8   11.96    3.14
   5  -8  -1    5.40    8.20
  -5   8   1    0.62    3.99
   5  -8  -1   -1.05    1.89
  -6  -2   4  622.40   29.83
   6   2  -4  644.79   23.37
  -6  -2   4  668.31   24.71
  -4  -5   0  176.76   16.08
  -4  -5   0  187.17   18.08
   5  -4  -7 1155.88   36.23
  -5   4   7 1122.90   35.49
   5  -4  -7 1296.32   40.27
   5  -4  -7 1140.48   34.42
   7  -3   0   -2.16   11.61
  -7   3   0    2.20    2.53
  -6  -1  -1   12.30    4.37
  -6  -1  -1   12.50    4.27
   3  -8  -3    0.86    1.04
  -3   8   3    0.36    1.58
   3  -8  -3    2.30    3.70
   6  -5   4   20.93   11.89
  -6   5  -4   47.19   11.67
   5  -8   3  564.37   23.01
  -6   7   1    1.73    4.43
   6  -7  -1    0.98    3.45
   6  -7  -1    5.18    6.63
   1  -9   4    4.69    3.50
   1  -9   4   -1.14    3.20
   7  -4  -2  273.02   26.92
  -7   4   2  248.61   21.39
   7  -4  -2  216.15   13.75
   7  -3  -3  165.94   21.58
   7  -3  -3  203.14    3.36
  -7   3   3  195.80   18.87
   7  -2  -3    3.30    2.02
  -7   2   3    1.76    1.84
  -5  -1  -4  710.49   36.41
   5   1   4  563.18   31.91
  -7   4   0   34.72   12.03
   7  -4   0   36.66   18.65
   1  -3  10   28.91    7.72
  -1   3 -10   36.31   11.66
   1  -3  10   26.99    8.33
  -3   9   0    9.15    4.50
   3  -9   0   41.68   11.79
   3  -9   0   37.83   11.79
   3  -9   4    2.92    2.93
   3  -9   4    6.15    7.79
   2  -8   7  194.68   16.72
   2  -8   7  225.78   24.07
   6   1  -6   77.12   10.23
  -6  -1   6   76.97   11.35
  -6  -1   6   68.45    9.41
   2  -9   0    9.55    5.75
   2  -9   0   13.82    4.34
  -2   9   0    7.55    3.28
  -1  -6   9    1.20    2.55
  -1  -6   9    1.13    2.55
  -1  -6   9   10.66    2.61
   4   2   5 1214.10   49.14
  -4  -2  -5 1156.65   36.11
   2  -8  -3 1737.96   55.27
   2  -8  -3 1624.59   49.35
  -2   8   3 1722.76   52.48
   3   1 -10  642.74   23.60
   3   1 -10  664.70   24.20
  -3  -1  10  682.19   24.81
  -3  -1  10  692.08   27.63
   1  -5  -7   15.92    5.78
  -1   5   7   12.04    5.94
  -1   5   7   14.95    3.82
   5  -7   5  248.37   19.53
  -5   7  -5  297.15   19.92
   1  -9   1   12.03    6.08
   1  -9   1   16.24    5.29
   5  -2   6  266.86   27.56
  -5   2  -6  260.31   17.15
   4  -5  -7 1867.90   57.51
   1   1   9   48.68   15.08
  -1  -1  -9   46.58   10.92
  -1  -1  -9   36.04   10.90
  -6  -2   1   18.00    4.58
  -6  -2   1    4.61    2.73
   6  -7   2    1.05    5.88
  -6   7  -2   -0.18    3.04
   1  -2  10  132.45   11.56
  -1   2 -10  143.15   12.75
   1  -2  10  116.96    8.57
   0   2   9   -0.52    3.57
   0  -2  -9   -0.04    1.97
   0   2   9    0.02    0.42
   6  -5  -5    8.11    2.23
   6  -5  -5    5.75    5.03
   6  -5  -5    3.06    6.49
  -5  -4   5  195.44   16.96
   5   4  -5  203.41    3.87
  -5  -4   5  200.87   17.65
  -5  -2  -3   39.39   14.41
  -5  -2  -3   54.91   16.41
   4  -6  -6 2922.07   22.22
   7  -2   0  331.33   32.61
  -7   2   0  306.57   19.69
  -5  -3   7  130.87   12.20
  -5  -3   7  140.64   13.99
   5   3  -7  137.57   11.74
   1  -4  10  731.62   29.44
  -1   4 -10  711.89   28.41
   1  -4  10  762.86   27.49
  -4  -4   8  500.48   21.74
  -6   2  -4    0.70    1.19
   6  -2   4    6.52   14.94
  -3  -2  10  158.63   17.12
   3   2 -10  149.50   12.82
   3   2 -10  147.30   13.15
  -5   0  -5  198.93   18.13
   5   0   5  151.20   24.14
  -1   4   8  137.59   11.70
   1  -4  -8  149.36   13.74
  -1   4   8   93.05   13.90
   4  -9   2   23.39    7.69
   4  -9   2   15.99    7.89
  -3  -6   7  443.62   16.65
  -3  -6   7  455.84   19.65
   3  -7  -5 2219.68   67.05
   3  -7  -5 2251.58   69.48
  -3   7   5 2080.51   63.11
   2  -9   5  212.10   15.59
   2  -9   5  198.96   19.67
  -7   1   2  358.69   22.78
  -7   1   2  342.26   21.91
  -1  -7   8  196.08   16.68
  -1  -7   8  191.97   16.87
  -1  -7   8  196.94   19.00
   3   0 -10  308.96   19.34
   3   0 -10  261.94   16.84
  -3   0  10  298.06   18.75
  -3   0  10  301.56   18.97
   0  -8   7   17.44    4.14
   0  -8   7   21.27    6.62
   0  -8   7   26.83    9.62
  -5  -4   1 1394.31   49.77
  -5  -4   1 1482.57   47.94
  -4  -3  -4    3.37    2.35
  -4  -3  -4    5.08    3.16
   4  -9   1   58.33   12.18
   4  -9   1   68.85   10.03
  -4   9  -1   48.40   11.80
  -4   2   9   49.67   11.77
   4  -2  -9   20.62    2.08
  -4   2   9   45.62    9.86
  -2  -6  -3  412.62   16.29
  -2  -6  -3  412.16   19.64
  -4  -1  -6  478.69   18.31
   4   1   6  373.36   34.65
  -3  -5  -3    6.32    2.62
  -3  -5  -3    5.82    3.64
   7  -4  -3  838.69   34.57
   7  -4  -3  812.21   24.93
  -7   4   3  852.98   27.57
   6  -1  -7  238.65   15.52
  -6   1   7  258.78   16.36
   6  -1  -7  233.49   15.73
   6  -1  -7  234.20   14.85
   0   0 -10  105.52   14.16
   0   0  10   82.40   11.95
   0   0 -10   83.48   13.45
  -6  -2   5   34.86    7.98
   6   2  -5   29.99    6.67
  -6  -2   5   37.75    9.27
  -7   1   3  462.93   21.77
  -7   1   3  467.97   18.03
   7  -1  -3  449.12   16.46
   6  -4  -6  114.01   18.12
   6  -4  -6  112.56   14.27
   6  -4  -6  122.12   13.58
  -1  -8   6  142.81   12.76
  -1  -8   6  149.97   15.89
  -7   5   1    0.99    2.25
   7  -5  -1    5.83    7.75
  -2   6  -9   93.29   12.26
   2  -6   9  135.58   13.85
   2  -6   9  137.55   12.59
   5  -7  -4  215.67   16.93
   5  -7  -4  185.27   16.11
  -5   7   4  170.16   16.83
  -4   8   3   12.27    4.60
   4  -8  -3   39.39    9.38
   4  -8  -3   43.51   12.37
   1  -6  -6    5.73    5.32
  -1   6   6    5.77    1.66
   2  -7  -5 3364.78   27.81
  -5   6  -6  436.87   17.23
   5  -6   6  407.64   22.74
  -2  -4  10 1602.91   50.32
  -2  -4  10 1540.13   46.83
   2   4 -10 1590.81   48.26
  -2   3   9    1.94    2.11
   2  -3  -9   16.00    6.20
   5   2  -8  412.24   14.73
  -5  -2   8  409.50   16.77
   6  -7  -2   75.73   16.40
   6  -7  -2   33.21    8.96
  -6   7   2   58.02   10.32
  -3  -6  -1  403.29   16.41
  -3  -6  -1  388.82   24.49
  -7   1   1   92.29   13.95
   7  -4   1  907.73   40.10
  -7   4  -1  925.17   29.79
   1  -9   5   73.01   12.09
   1  -9   5   63.34   10.41
   1  -9   5   77.13   10.88
  -7   3  -1   -0.36    2.52
   7  -3   1    0.49    9.61
   0  -5  10   85.53   11.47
   0   5 -10   86.87   11.35
   0  -5  10   85.67   13.77
  -2   1  10  132.76   13.77
  -2   1  10  124.28   11.14
   2  -1 -10  125.32   11.15
   2  -1 -10   91.94   13.45
   6  -6  -4  200.85   20.41
   6  -6  -4  118.01   11.58
   6  -6  -4  192.15   16.62
  -7   2   4  318.29   20.18
  -7   2   4  319.87   21.00
   7  -2  -4  299.22   18.69
  -7   5   0 1523.82   49.60
  -2  -7   7    1.80    2.33
  -2  -7   7    0.79    1.29
  -2  -7   7    3.01    1.00
   4  -9   3  406.85   20.07
   4  -9   3  427.62   20.24
  -1  -8   0    2.51    1.40
  -1  -8   0   -1.79    2.27
  -6   2   7  624.53   23.21
   6  -2  -7  630.17   24.23
   6  -2  -7  560.95   20.39
   3   0   8  119.48   18.45
  -3   0  -8  139.59   15.67
   4  -4  -8   60.39   12.43
   7  -3  -4  250.40   22.53
   7  -3  -4  250.03   15.60
  -7   3   4  232.55   16.92
   6   0  -7  622.42   22.48
   6   0  -7  599.61   23.00
   6   0  -7  679.41   24.62
  -6   0   7  620.04   22.77
   5  -8  -2  979.70   31.53
  -5   8   2  982.04   32.42
   5  -8  -2 1024.41   34.48
  -6   6  -4    2.62    3.20
   6  -6   4    0.99    8.99
   3  -3  -9 1098.31   34.17
   7  -5  -2  282.64   26.53
   7  -5  -2  245.58   15.56
  -7   5   2  253.28   18.05
  -4  -3   9  423.82   16.53
   4  -9   0    6.48    2.21
   4  -9   0   -0.09    4.33
  -4   9   0    0.41    3.30
  -2  -7  -1   -0.01    0.73
  -2  -7  -1    1.68    1.94
   5  -8   4   32.41    9.56
  -5   8  -4   49.70   14.09
  -2  -4  -6  106.82   15.15
   2   4   6   95.26   12.77
   2   4   6   92.21   32.71
  -1   1  10  123.90   11.37
   1  -1 -10  152.99   13.34
   1  -1 -10  125.40   14.06
   2   3   7    3.12    8.02
   2   3   7   20.78    2.60
  -2  -3  -7   19.60    6.16
   5  -3  -8   86.91   11.17
  -5   3   8   95.07   13.50
   5  -3  -8   91.78   12.68
   1   4   7   12.35    3.17
  -1  -4  -7   13.17    4.26
   1   4   7    1.94    7.59
   1   5 -10 1063.47   32.82
  -1  -5  10 1043.06   31.67
  -1  -5  10 1102.43   41.02
  -4  -5   7  169.27   16.65
  -4  -5   7  166.50   14.13
  -4   4  -8  557.68   24.40
   4  -4   8  571.98   29.77
  -1   1 -10   77.51   14.31
   1  -1  10   84.72   14.28
  -1   1 -10  106.77   15.20
   3  -4   9  134.86   16.40
  -3   4  -9  175.10   16.11
   3  -9  -1  188.41   16.65
   3  -9  -1  191.71   18.01
  -3   9   1  181.39   16.02
   3  -9   5 1016.10   35.12
   3  -9   5 1005.11   36.93
   1  -9   0   31.28    8.92
   1  -9   0   23.32    9.37
   2   0   9  898.92   32.24
  -2   0  -9  985.92   32.05
   0  -9   3  541.85   23.06
   0  -9   3  549.19   20.72
   0   7   4   26.72    7.06
   0  -7  -4   32.52    7.62
   0  -7  -4   35.57   10.33
  -4   7   5  276.57   18.65
   4  -7  -5  346.76   21.25
   4  -7  -5  319.32   21.66
   6  -7   3    2.09    6.58
  -6   7  -3    2.11    2.85
  -6  -2   0  773.56   32.38
  -6  -2   0  805.09   25.34
   3  -3   9   42.15   13.95
  -3   3  -9   53.50   13.41
  -7   1   4   58.24    8.45
  -7   1   4   73.00   11.28
   7  -1  -4   68.84    8.96
  -3  -3  10   36.07    9.11
   0  -8  -2   38.67    9.32
   0  -8  -2   42.48   11.37
   0   8   2   30.90    8.43
  -7   5  -1  147.35   13.32
   7  -5   1  189.32   24.15
   4  -7   7   -1.21    5.35
  -4   7  -7    5.05    3.75
  -6   0  -3  198.22   17.69
   6   0   3  110.92   23.46
   4  -3   8  933.72   36.73
  -4   3  -8 1033.57   33.84
  -7   2  -1   20.44    4.78
   7  -2   1   11.67   12.67
  -1   5 -10 2398.60   73.36
   1  -5  10 2544.36   81.56
   1  -5  10 2445.45   74.09
  -2   9   1  388.95   24.65
   2  -9  -1  417.02   17.58
   2  -9  -1  435.90   17.95
  -1   8   3  210.27   13.36
   1  -8  -3  183.71   16.58
   1  -8  -3  193.93   17.54
  -5  -4   6   74.07   10.20
   5   4  -6   71.43    9.52
  -5  -4   6   75.67   13.65
   0  -9   4   92.77   15.51
   0   9  -4   65.53   10.49
   0  -9   4   67.59    9.32
  -5  -3  -2  837.47   26.77
  -5  -3  -2  883.58   32.14
   3  -8   7  101.30   18.40
  -3   8  -7   95.86   18.19
   0  -9   2  791.15   25.27
   0  -9   2  764.02   31.63
   1   5   6   30.38    7.20
  -1  -5  -6   40.22   12.12
  -1  -5  -6   35.69    9.63
   3   7  -3   64.50   12.68
  -3  -7   3   75.46   10.07
  -3  -7   3   94.23   15.99
   7  -1   0   13.49   14.67
  -7   1   0   -0.26    2.42
  -3   1  10  223.44   14.26
  -3   1  10  240.04   15.33
   3  -1 -10  211.29   14.25
   3  -1 -10  230.66   15.67
   4  -8   6  551.30   22.76
  -4   8  -6  524.06   24.22
  -1   3   9  772.76   27.75
   1  -3  -9  783.00   10.44
  -1   3   9  767.58   29.05
  -4  -5  -1  315.30   21.15
  -4  -5  -1  322.51   20.86
  -3  -7   4    1.66    2.58
   3   7  -4    2.56    2.63
  -3  -7   4   -0.02    1.09
   3  -7   8   19.70    5.76
  -3   7  -8   39.06   11.59
   1   7   3   17.94    5.53
  -1  -7  -3   25.19    8.16
  -1  -7  -3   16.55    4.51
   4  -5   8    5.71    5.97
  -4   5  -8   15.24    5.34
  -1  -3  -8  127.91   11.72
   1   3   8  155.34   19.53
   1   3   8  125.61   11.11
  -4  -4  -3 1145.87   35.80
  -4  -4  -3 1049.28   33.16
   5  -1   6  361.74   30.90
  -5   1  -6  386.64   24.49
  -6  -1  -2    4.63    2.55
   4  -9   4  642.73   28.06
   4  -9   4  661.70   26.84
  -5  -4   0   52.01   17.62
  -5  -4   0   59.34    9.34
   7  -4  -4  115.68   18.57
   7  -4  -4   86.60   15.83
   7  -4  -4  113.01   14.63
   4   0   7   -1.39   11.21
  -4   0  -7    0.60    3.69
  -6   3   7   16.59    5.57
   6  -3  -7   19.40    5.21
   6  -3  -7   25.31    8.32
   6  -3  -7   10.04    3.71
  -3   5  -9    8.90    4.02
   3  -5   9   12.28    8.70
  -3  -3  -6  149.33   13.73
   3   3   6  121.42   18.32
   7  -5  -3    6.91    5.16
   7  -5  -3    6.19    2.45
   7  -5  -3   -0.98    6.15
  -6   4  -5  101.44   14.31
   6  -4   5   73.62   17.95
  -2  -5  -5  201.51    6.55
  -2  -5  -5  151.07   13.76
  -4  -6   3   17.85    5.26
   4   6  -3   11.32    3.93
  -4  -6   3   12.41    4.44
   6  -1   4    2.79   13.98
  -6   1  -4    6.37    3.23
  -3  -7   2   61.71    9.90
   3   7  -2   48.69   12.09
  -3  -7   2   51.69   12.55
   1  -7   9   -2.61    3.20
  -1   7  -9   -0.10    1.09
   1  -7   9    0.75    0.72
   6   2  -6    2.78    1.06
  -6  -2   6    1.91    1.49
  -6  -2   6    2.12    1.74
   2  -9   6  262.39   18.85
   2  -9   6  317.12   26.34
  -7   0   2    0.15    1.74
  -7   0   2   -0.13    1.60
  -4  -6   4  281.32   21.99
   4   6  -4  294.56   18.52
  -4  -6   4  349.80   22.16
   2   2   8    0.29    7.19
   2   2   8    0.64    1.06
  -2  -2  -8    2.38    1.40
  -7   0   3  157.89   14.12
   7   0  -3  169.11   14.63
  -7   0   3  164.83   16.21
  -7   4  -2  771.29   28.94
   7  -4   2  747.27   38.81
   3  -2   9  131.49   19.02
  -3   2  -9  125.23   11.94
  -6  -1   7  236.18   15.12
   6   1  -7  247.53   16.91
   6   1  -7  254.50   15.78
  -3  -5   9   46.27   11.04
   0  -7   9  373.29   23.05
   0  -7   9  388.84   29.41
   3   7  -5  987.99   31.31
  -3  -7   5  999.11   36.15
  -3  -7   5 1029.40   33.84
   6  -7  -3  325.01   23.51
  -6   7   3  352.28   24.89
   6  -7  -3  255.42   16.83
  -1   7   5 1035.28   31.50
   1  -7  -5 1028.65   32.63
   1  -7  -5 1040.97   31.91
  -2  -6   9  927.24   28.15
  -2  -6   9  955.07   34.97
   4  -9  -1  576.34   24.11
   4  -9  -1  510.23   19.11
  -4   9   1  494.56   19.73
   1  -9   6   28.39    8.66
   1  -9   6   39.18   10.33
   1  -9   6   30.70    8.19
   7  -2  -5   17.05    4.26
  -7   2   5   22.92    7.80
   7  -2  -5   17.79    4.37
  -7   2   5   21.17    7.50
   5   0  -9    1.00    0.78
  -5   0   9    5.86    1.73
   5   0  -9    7.12    2.65
   5   0  -9    2.71    1.24
   0  -9   5   21.77    7.38
   0   9  -5   20.31    4.49
   0  -9   5   24.65    9.14
  -7   3  -2  551.08   21.02
   7  -3   2  523.14   32.90
   1  -8   8  203.44    9.04
   1  -8   8  223.63   15.95
   1  -8   8  217.10   13.80
   2   8  -3    2.53    2.53
  -2  -8   3    2.56    3.05
  -2  -8   3    2.01    2.08
   6  -5   5   84.17   17.57
  -6   5  -5   98.41   14.24
   0  -9   1   -2.09    1.90
   0  -9   1    2.01    2.69
   3   2   7   50.65   18.32
  -3  -2  -7   79.23   10.90
   6  -3   5    1.68   11.34
  -6   3  -5    3.75    3.28
  -2  -8   4   -0.36    0.96
  -2  -8   4   -2.05    2.47
   2   8  -4    0.00    1.78
  -7   6   0  625.18   27.01
   7  -6   0  531.54   26.05
  -3  -4  -5    3.64    1.91
  -3  -4  -5    0.41    1.92
   4  -2   8   66.70   16.02
  -4   2  -8   86.47   12.25
  -7   6   1  844.39   27.23
   7  -6  -1  916.92   34.35
   0   5   7  150.54   17.53
   0   5   7  176.25   15.01
   0  -5  -7  182.08   17.02
  -1  -8   7  467.56   17.68
  -1  -8   7  445.60   24.65
  -1  -8   7  442.18   16.53
   3  -8  -4   86.78   11.76
   3  -8  -4   88.61   13.52
  -3   8   4   44.21    9.72
   4   6  -2   -0.87    1.34
  -4  -6   2    4.16    4.10
  -4  -6   2    0.33    0.92
   5  -6  -6  623.19   24.39
  -2   3 -10   27.11    9.89
   2  -3  10    9.36    4.99
   5  -5  -7  312.63   20.93
  -5   1   9    4.06    1.34
   5  -1  -9    7.01    3.32
   5  -1  -9   12.81    3.95
   4  -3  -9   -0.91    1.67
  -4   3   9    3.72    4.32
   4  -3  -9    0.22    0.73
   7  -3  -5 1487.63   48.17
   7  -3  -5 1448.06   44.16
   7  -3  -5 1695.10   57.39
  -7   0   1    3.51    1.62
  -7   0   1   -1.79    1.75
  -5   4  -7  728.99   32.00
   5  -4   7  828.80   34.54
  -7   1   5   80.62   11.81
   7  -1  -5   69.06    9.30
  -7   1   5   75.35   11.10
   0  -4  -8   50.31   15.41
   0   4   8   47.75   10.38
   0   4   8   28.80    9.42
  -2   4 -10  104.41   14.35
   2  -4  10  104.36   15.80
  -4  -6   5  284.98   18.52
   4   6  -5  255.17   16.14
  -4  -6   5  313.52   26.95
  -6  -3   3   64.24   13.80
  -6  -3   3   65.26   19.56
   6   3  -3   28.83    6.74
  -7   5  -2    8.79    4.17
   7  -5   2    7.33    9.65
  -7   0   4   92.56   14.24
   7   0  -4   94.91   12.66
  -7   0   4   98.78   13.19
  -5   7  -6  342.58   22.14
   5  -7   6  276.34   21.97
  -1  -8  -1  281.58   18.05
  -1  -8  -1  273.82   18.16
   0   1  10   86.13   13.08
   0  -1 -10   75.36   12.79
   0  -1 -10   94.11   14.90
  -3  -6   8   59.77    9.50
  -3  -6   8   54.85   11.80
  -5  -1   9   14.37    4.62
   5   1  -9    8.98    3.25
   5   1  -9    9.37    3.06
   5   1  -9   12.51    3.13
   6  -8   1   19.84    6.93
   6  -8   1   39.41   15.03
  -4  -1  10  187.37   16.28
  -4  -1  10  180.16   15.83
   4   1 -10  185.97   15.79
   4   1 -10  181.86   15.74
   6  -8   0   47.23   11.31
   6  -8   0   93.58   18.21
  -6   8   0   58.91   12.11
  -5  -3   8   52.73   11.92
  -4   0  10   41.74    9.85
  -4   0  10   32.95    8.13
   4   0 -10   48.26   10.63
   4   0 -10   36.06   10.08
  -5   8   3  186.41   18.34
   5  -8  -3  192.03   19.01
   5  -8  -3  216.36   14.13
  -2  -8   2    0.07    0.85
  -2  -8   2   -0.17    2.17
  -1  -6  -5  249.25   16.37
   1   6   5  250.07   15.69
  -1  -6  -5  238.46   16.42
   6   3  -4    4.65    2.07
  -6  -3   4    6.48    2.10
  -6  -3   4    0.55    2.56
  -2  -5  10  146.16   14.59
  -2  -5  10  145.92   12.40
   2  -8   8   35.14    8.87
   2  -8   8   21.33    7.79
  -2   8  -8   32.53   10.35
  -1  -2  11  429.21   16.75
  -1  -2  11  407.85   15.24
   1   2 -11  408.53   15.22
   1   2 -11  398.76    9.34
   7  -6   1   83.12   18.21
  -7   6  -1   98.52   19.13
  -5   5  -7    3.14    3.64
   5  -5   7    1.62    9.70
   6  -5  -6  133.48   11.46
   6  -5  -6  142.38   15.07
   6  -5  -6   93.99   13.80
  -7   1  -1  198.82   17.82
   7  -1   1  162.99   26.64
  -2   8   4 1596.00   48.47
   2  -8  -4 1668.67   51.44
   2  -8  -4 1655.03   53.23
   1  -9  -1  243.80   15.31
   1  -9  -1  304.29   19.96
  -1   9   1  297.13   19.13
   4  -6   8   30.89    8.36
  -4   6  -8   48.20   12.93
   2  -2 -10  783.85   12.72
  -2   2  10  756.26   27.64
   2  -2 -10  677.30   25.04
  -6  -3   2 2948.60   26.67
  -6  -3   2 2803.88   31.33
   6   3  -2 2724.81   82.75
  -5   8  -5  474.42   25.90
   5  -8   5  425.99   25.68
  -2  -8   5   37.45   13.17
   2   8  -5   30.42    8.00
  -2  -8   5   26.88    6.57
   0  -8   8    4.07    1.67
   0  -8   8    0.71    2.98
   0  -8   8    1.34    2.81
   0   6 -10   91.51   12.26
   0  -6  10   85.22   11.74
   0  -6  10   61.44   11.30
  -5   3  -7  306.26   16.23
   5  -3   7  237.87   22.18
   5  -9   1 1964.41   61.22
   5  -9   1 2026.69   64.06
  -6   7  -4  319.95   17.21
   6  -7   4  310.08   21.11
  -1   0 -10   17.68    5.96
  -1   0 -10    3.85    5.04
   1   0  10    5.40    4.88
   7  -6  -2 1166.19   40.10
   7  -6  -2  980.05   33.19
   7  -6  -2 1021.53   32.69
  -6  -2  -1  335.79   22.07
  -6  -2  -1  237.14   15.02
  -3  -7   1   35.66   10.34
  -3  -7   1   51.48   15.59
  -1  -3  11  333.55   16.72
  -1  -3  11  315.64   14.62
   1   3 -11  316.59   15.21
   5  -9   2  789.36   32.64
   5  -9   2  724.52   27.73
   6  -6  -5    1.48    0.99
   6  -6  -5   -2.92    4.25
   6  -6  -5   -0.85    1.98
  -3   9   2   -1.35    1.68
   3  -9  -2    2.89    2.04
   3  -9  -2    0.50    4.20
   3  -9   6  171.92   15.38
   3  -9   6  158.29   15.81
  -2   7  -9  820.63   30.02
   2  -7   9  779.94   37.12
   2  -7   9  807.26   30.03
  -3  -6  -2   86.03   12.74
  -3  -6  -2   74.91   10.63
  -2  -7   8  428.26   26.17
  -2  -7   8  371.75   23.60
  -2  -7   8  377.23   23.38
   3  -6  -7    2.18    2.24
   1   2   9    1.70    5.49
   1   2   9    2.17    0.90
  -1  -2  -9    1.76    2.36
   2  -2  10  811.26   32.31
  -2   2 -10  851.84   32.26
  -7   2  -2   54.01   14.68
   7  -2   2   23.48   13.14
   6  -8   2  170.77   15.22
  -6   8  -2  206.61   18.99
   3  -5  -8   10.13    5.25
  -3  -4  10  173.07   15.39
   4  -8  -4  653.88   25.50
  -4   8   4  546.57   29.46
   0  -6  -6 1107.14   40.74
   0   6   6 1043.46   36.92
  -3  -7   6  108.54   14.50
  -3  -7   6  109.92   13.52
   3   7  -6  106.90   13.11
  -3   6  -9  444.85   25.95
   3  -6   9  433.18   27.18
  -5  -4   7  317.45   19.21
   5   4  -7  305.02   14.00
  -5  -4   7  334.27   15.41
   4  -9   5  150.21   15.95
   4  -9   5  156.53   13.75
   5   1   5  427.26   36.73
  -5  -1  -5  525.41   28.71
   2   2 -11    4.85    2.85
   2   2 -11    3.97    1.95
  -2  -2  11    0.59    1.09
  -2  -2  11    1.56    1.27
  -5  -2  -4  162.94   13.85
   5   2   4  177.48   30.56
  -4  -4   9  504.19   28.68
   1  -6  10   80.01   12.61
   1  -6  10   97.76   11.28
  -1   6 -10   95.68   11.53
   2  -5  -8  784.76   28.95
   6  -8  -1   -6.57    6.58
  -6   8   1   -1.70    5.16
   6  -8  -1   -0.96    2.75
   5  -7  -5  463.44   26.32
   5  -7  -5  424.87   22.32
  -5   7   5  499.59   27.42
   4   2 -10    4.04    2.55
   4   2 -10    2.31    0.64
  -4  -2  10    5.07    3.13
   4   2 -10    3.68    1.43
  -5   9   0    9.91    5.08
   5  -9   0   41.68   11.24
   5  -9   0   42.94   14.62
  -1  -1  11    1.20    2.21
  -1  -1  11    3.94    3.35
   1   1 -11    3.61    2.20
   1   1 -11   -1.05    3.28
   6  -6   5   -2.25    9.35
  -6   6  -5    0.51    1.70
  -2   5 -10 1213.82   43.39
   2  -5  10 1281.63   48.34
   7  -5  -4 1656.61   22.42
   7  -5  -4 1509.01   56.86
  -3   2  10  298.31   14.15
  -3   2  10  285.40   14.02
   3  -2 -10  294.27   15.01
   3  -2 -10  264.73   14.59
   5  -4  -8   16.26    4.93
  -2   6   7   32.01    8.03
  -2   6   7    4.68    4.64
   2  -6  -7   34.74    9.86
   6  -2   5 1426.12   60.14
  -6   2  -5 1489.79   53.53
  -1  -7   9  205.80   15.01
  -1  -7   9  231.49   12.61
  -1  -7   9  226.25   13.21
   0  -3  11   28.21    9.15
   0  -3  11   24.62    5.31
   0   3 -11   25.59    6.56
  -2  -7  -2  104.08   12.36
  -2  -7  -2   96.99   11.93
  -4  -6   1  371.09   17.58
  -4  -6   1  375.13    8.73
   2  -9  -2   76.30   16.34
   2  -9  -2   76.52    9.21
  -2   9   2   68.36    9.79
   2   1 -11   18.08    4.25
  -2  -1  11   17.02    5.89
  -2  -1  11   13.25    4.37
   2   1 -11    6.84    4.62
  -5   2   9  881.98   32.27
   5  -2  -9  896.60   31.76
   5  -2  -9  911.55   32.88
  -5   2   9  912.49   32.47
  -4  -5   8  374.53   14.65
   0  -9   6    4.48    2.29
   0  -9   6    4.38    2.52
   0  -9   6    1.80    2.39
   6   3  -5  303.86   14.18
  -6  -3   5  327.97   15.50
  -6  -3   5  328.80   16.71
  -7   0   0   21.40    7.28
  -7   0   0   26.63    8.95
   6  -1  -8  263.34   13.23
   6  -1  -8  256.71   12.84
   6  -1  -8  250.34   11.89
  -6   1   8  285.83   13.55
   4  -1 -10  581.49   31.25
  -4   1  10  636.60   23.57
   4  -1 -10  576.86   30.57
  -4   1  10  570.13   30.07
   7  -4  -5   49.87   14.32
   7  -4  -5   48.22   15.27
   7  -4  -5   58.55   14.61
   0   2 -11   26.72    7.91
   0  -2  11   20.36    6.07
   0  -2  11   12.67    5.86
   6  -4  -7   31.26    8.43
   6  -4  -7   27.43    8.29
   6  -4  -7   24.82    5.97
   0   3   9  476.95   25.34
   0   3   9  462.66   27.45
   0  -3  -9  537.90   28.59
  -3   1  -9   66.68    6.89
   3  -1   9   57.71   17.48
   1  -2 -10    0.02    0.87
  -1   2  10   -1.07    1.76
   3   1   8   66.54   15.97
  -3  -1  -8   72.87   10.05
  -5  -4  -1   32.75    9.34
  -5  -4  -1   36.09    9.80
   0  -9   0    1.40    2.50
   0  -9   0    3.22    2.55
   4   6  -6   13.60    3.51
  -4  -6   6    8.78    4.77
  -4  -6   6   13.44    4.15
   5  -9   3   53.22   14.94
   5  -9   3   63.68   20.45
  -5  -5   3   17.40    5.06
   5   5  -3   18.27    5.29
  -5  -5   3   19.36    6.10
  -7   0   5  118.15   10.21
   7   0  -5  117.22    4.12
  -7   0   5  116.47   13.81
   5   5  -4    0.05    0.63
  -5  -5   4    1.49    1.09
  -5  -5   4   -0.59    2.39
  -2  -6  -4  352.82   16.82
  -2  -6  -4  333.19   16.33
  -1  -6  10   15.12    3.74
  -1  -6  10   14.31    5.24
  -3  -5  -4  890.14   32.98
  -3  -5  -4  834.74   30.99
  -6  -3   1  482.21   26.66
  -6  -3   1  479.06   26.95
  -2  -8   1  438.62   25.00
  -2  -8   1  467.76   26.02
   6   0  -8   64.59   16.37
  -6   0   8   67.99    8.95
   6   0  -8   69.43    8.20
   6   0  -8   61.08   15.77
   4  -9  -2    1.44    1.22
  -4   9   2    0.62    2.36
   4  -9  -2    4.58    6.26
  -2  -3  11   72.38    8.42
   2   3 -11   73.10    9.72
  -2  -3  11   77.58    9.94
  -7   6  -2   63.56   17.10
   7  -6   2   58.84   20.18
  -5  -2   9   13.78    3.92
   2   1   9  166.98   19.09
  -2  -1  -9  220.57    5.35
   5  -6   7   49.79   16.26
  -5   6  -7   96.18   12.30
  -7   4  -3   33.60    9.64
   7  -4   3   37.85   19.43
   3  -7  -6  173.04   14.14
  -4  -5  -2   15.97    4.80
  -4  -5  -2    9.25    6.12
   1   4 -11  917.91   33.52
  -1  -4  11  890.39   32.08
  -1  -4  11  974.57   45.34
  -6  -2   7   38.94   10.71
   6   2  -7   51.48   12.84
  -6  -2   7   52.14   14.08
  -4  -2  -6   86.90   12.03
   4   2   6   18.13   14.32
   4  -6  -7   10.27    5.61
  -6   2   8  511.12   26.98
   6  -2  -8  519.87   28.48
   6  -2  -8  501.21   26.63
  -2  -8   6  889.01   32.06
  -2  -8   6  896.66   37.16
   2   8  -6  897.86   32.97
   0   4 -11  648.12   23.76
   0  -4  11  648.85   23.47
   0  -4  11  754.19   32.71
  -4  -3  -5   78.67   10.40
   4   3   5   27.37   14.98
  -5   2  -7  222.62   16.56
   5  -2   7  193.90   24.64
  -4   1  -8  247.03   16.73
   4  -1   8  253.85   23.98
   7  -6  -3    7.14    2.94
   7  -6  -3    4.83    4.79
   7  -6  -3   15.36   10.57
   3  -4  -9  465.50   25.97
  -6   7   4  122.00   25.25
   6  -7  -4   47.28   12.31
   6  -7  -4  126.83   13.08
   0  -8  -3  124.96   10.50
   0   8   3  114.33   14.52
   0  -8  -3  120.12   13.98
  -2   4   9  238.59   11.45
   2  -4  -9  286.09   14.13
  -2   4   9  280.74   13.18
   7  -2  -6  512.69   29.03
   7  -2  -6  496.55   26.40
   7  -2  -6  533.79   28.56
  -7   2   6  525.08   29.10
  -6   8  -3    1.51    1.96
   6  -8   3   -2.02    5.25
  -5   0  -6  288.92   13.60
   1  -9   7   14.64    5.02
   1  -9   7   14.90    6.95
   1  -9   7   18.65    7.09
  -5  -5   2  306.26   15.49
  -5  -5   2  299.56   16.96
   4  -5  -8  114.77   14.58
   2  -9   7    0.02    3.68
   2  -9   7   -0.67    3.57
  -7  -1   3   92.44   12.24
   7   1  -3   84.06    9.81
  -7  -1   3  108.50   17.06
  -5  -3  -3  263.29   15.90
  -5  -3  -3  230.27   12.01
   4  -8   7  558.46   31.97
  -4   8  -7  520.94   28.77
  -5  -5   5   64.09   16.96
  -5  -5   5   58.44   15.75
  -7   3  -3  392.12   21.74
   7  -3   3  420.02   40.63
  -7   5  -3   43.77   12.25
   7  -5   3   56.28   20.09
   5  -9  -1    7.94    3.91
   5  -9  -1    1.96    5.33
  -5   9   1    1.76    4.08
   2 -10   3  189.66   18.72
   2 -10   3  166.49   14.71
  -1  -9   3  121.30    9.65
  -1  -9   3  120.64    9.77
  -7   1   6    4.07    2.05
   7  -1  -6    1.29    1.21
   6   1   3  704.21   44.27
  -6  -1  -3  670.68   25.21
  -6   0  -4    4.41    3.23
   6   0   4    5.90   15.40
   3 -10   2  184.73   14.24
   3 -10   2  167.41   16.22
  -1  -9   4   17.81    4.95
   1   9  -4   21.13    6.13
  -1  -9   4   22.53    5.62
  -7  -1   2  138.90   15.93
  -7  -1   2  150.17   11.55
  -2   0  11   21.24    5.09
   2   0 -11   12.76    5.53
   2   0 -11   29.93    5.75
  -2   0  11   26.99    7.28
   2 -10   2 1192.12   44.42
   2 -10   2 1187.61   44.05
   2  -7  -6    0.13    0.77
  -2   7   6   -0.12    0.59
   2  -7  -6    1.12    3.43
  -6   8   2   54.55   15.26
   6  -8  -2   33.87    9.37
   6  -8  -2   74.47   15.21
   0  -1  11  515.10   28.41
   0   1 -11  449.76   26.86
   0   1 -11  506.03   26.84
   3 -10   3   89.77   14.02
   3 -10   3  100.91   12.66
   2  -1  10   24.04    8.82
  -2   1 -10   39.24   14.16
  -3  -7   0  603.95   22.22
  -3  -7   0  591.74    7.58
   1  -8  -4    1.16    0.64
   1  -8  -4    0.25    2.90
  -1   8   4    0.24    0.92
   3  -8   8   80.31   18.69
  -3   8  -8   62.88   17.35
  -7  -1   4   95.38   16.30
  -7  -1   4  106.17   12.59
   7   1  -4   91.41   11.58
  -1   0  11  368.61   17.27
   1   0 -11  406.65   22.79
   1   0 -11  370.83   20.68
  -1   0  11  442.80   24.33
   7  -3  -6    1.35    1.15
   7  -3  -6    6.60    2.85
   7  -3  -6    7.13    7.04
   7  -3  -6    2.21    3.22
   4  -7  -6   78.52   11.27
   1  -5  -8   70.79   11.91
  -1   5   8   64.72   16.30
  -1   5   8   48.40   15.23
   7  -7   0   48.85   14.95
  -7   7   0   64.95   13.45
   2 -10   4  473.79   26.62
   2 -10   4  420.98   24.43
  -4  -3  10  492.28   27.00
  -6  -1   8   12.74    3.22
   6   1  -8   14.14    3.69
   6   1  -8   15.06    5.61
  -1  -8   8  254.76   18.04
  -1  -8   8  218.72    4.93
  -1  -8   8  215.54   15.96
   4   1   7  429.26   34.39
  -4  -1  -7  454.20   24.84
  -7   1  -2    4.22    3.58
   7  -1   2    7.70   16.35
  -6  -3   6  183.93   14.85
  -6  -3   6  202.61   15.94
   6   3  -6  188.12   13.53
  -1  -9   2    3.72    2.90
  -1  -9   2    3.59    2.96
   3   1 -11  366.61   17.79
   3   1 -11  407.87   21.59
  -3  -1  11  397.46   21.72
  -3  -1  11  385.83   20.64
   3 -10   1   68.90   10.63
   3 -10   1   74.48   12.31
   5  -9   4   92.64   12.47
   0  -7  -5    8.78    4.87
   0   7   5    6.31    2.59
   0  -7  -5    7.08    3.26
  -4   7  -8   78.65   11.32
   4  -7   8   43.95   13.51
  -3  -7   7   26.78    8.71
   3   7  -7    8.36    4.00
  -3  -7   7   19.55    5.40
  -2   6 -10  262.35   13.01
   2  -6  10  213.17   18.39
  -1  -7  -4  597.90   22.73
  -1  -7  -4  627.53   22.75
   3   2 -11   25.64    7.18
  -3  -2  11   20.18    4.41
  -3  -2  11   23.34    7.31
   3   2 -11   17.45    4.38
  -1   6   7 1706.82   19.44
   1  -6  -7 1554.94   55.92
   7  -7  -1   -0.65    5.43
   7  -7  -1    0.70    4.68
  -1  -9   5   28.99    8.30
   1   9  -5   20.91    5.59
  -1  -9   5   25.99    6.91
  -4  -6   0  246.54   12.46
  -4  -6   0  257.61   13.39
  -4  -4  -4    9.47    4.35
  -4  -4  -4   24.90    8.39
  -7   7  -1  412.01   26.19
   2 -10   1  244.71   13.04
   2 -10   1  230.65   13.94
   1  -3  11 1387.69   50.65
  -1   3 -11 1321.69   47.26
  -4   2  10  459.60   24.10
  -4   2  10  482.41   26.28
   4  -2 -10  500.76   26.63
   4  -2 -10  515.84   27.76
  -1  -8  -2  455.72   24.39
  -1  -8  -2  610.08   23.07
  -7  -1   1  529.29   29.93
  -7  -1   1  544.05   29.61
   3 -10   4   88.62   16.02
   3 -10   4   69.80   21.09
  -7   0  -1  717.36   26.76
   7   0   1  727.95   44.78
  -2  -4  11  204.82   14.58
   2   4 -11  198.02   14.29
  -2  -4  11  224.11   14.72
   1  -9  -2   10.13    4.18
  -1   9   2    9.81    4.23
   1  -9  -2    9.47    5.25
  -5   8   4  150.11   13.85
   5  -8  -4  155.70   14.45
   5  -8  -4  163.93   12.44
  -6  -3   0  463.27   25.03
  -6  -3   0  448.76   27.39
  -6   7  -5  486.46   26.51
   6  -7   5  545.28   33.41
  -5  -5   1   39.28   10.53
  -5  -5   1   34.35    9.29
   5  -3  -9   -1.02    1.76
  -5   3   9   -0.76    2.81
  -5   3   9    0.14    0.31
   6  -3  -8 1111.00   40.02
  -6   3   8 1134.97   40.41
   6  -3  -8 1184.79   42.23
  -6  -2  -2  223.80   13.71
  -6  -2  -2  212.32   18.19
   6  -1   5  272.62   30.10
  -6   1  -5  306.91   19.46
   4   6  -7  381.11   20.49
  -4  -6   7  410.49   25.34
  -4  -6   7  384.81   20.41
   4  -9   6   76.36   16.10
  -4   9  -6   64.02   18.89
  -1   4 -11 1058.15   38.40
   1  -4  11 1053.87   41.23
   1  -4  11 1037.85   37.07
   4  -4  -9  415.82   22.51
  -7   0   6    5.12    3.01
   7   0  -6    9.24    3.57
  -7   0   6    9.56    3.80
  -2  -8   0   43.46   14.51
  -2  -8   0   38.79   10.94
   5  -8   6   35.48   11.71
  -5   8  -6   59.63   18.29
   0  -9   7    4.92    2.77
   0  -9   7   11.02    5.39
   0  -9   7   10.22    5.25
  -3   7  -9   62.20   17.50
   3  -7   9   36.74   10.83
  -1   4   9  655.31   25.88
  -1   4   9  642.07   22.84
   1  -4  -9  656.94   24.21
   0   5 -11  662.26   24.16
   0  -5  11  659.35   25.40
   0  -5  11  654.22   24.07
   7  -5  -5  116.17   13.28
   7  -5  -5  146.38   15.66
   7  -5  -5  108.48   16.62
   1 -10   3   23.42    7.17
   1 -10   3   18.89    6.12
  -5  -5   6  344.26   16.08
   5   5  -6  323.15   15.46
  -5  -5   6  333.73   20.30
   3   0 -11  596.79    8.29
  -3   0  11  593.28    5.82
  -3   0  11  646.57   23.40
   3   0 -11  533.94   28.99
   7  -2   3   20.68   16.20
  -7   2  -3   24.83    8.53
   7  -6   3  468.24   31.98
  -7   6  -3  500.11   27.78
  -6   5  -6  103.59   13.23
   6  -5   6   81.33   16.79
  -3   9   3    4.08    2.25
   3  -9  -3   24.42    5.69
   3  -9  -3   20.20    7.97
   3  -9   7    9.96    5.17
  -1  -1 -10  206.77   15.77
   1   1  10  196.01   18.46
  -1  -1 -10  174.85   16.43
   1  -8   9  311.26   15.71
   1  -8   9  307.73   20.05
   1  -2  11    0.16    3.11
  -1   2 -11    8.70    3.90
  -7  -1   5    1.04    2.26
   7   1  -5    0.56    0.87
  -7  -1   5    1.21    1.91
  -3  -6   9   94.89   12.32
   0  -9  -1  107.46   14.15
   0  -9  -1   90.58   12.65
   0  -2 -10  547.96   32.21
   0   2  10  530.80   28.66
   0   2  10  561.95   31.95
   4 -10   2  432.53   26.43
   4 -10   2  408.31   23.27
  -5  -4   8  529.66   28.82
   2   4   7    5.03    8.36
  -2  -4  -7   31.29    7.01
   1 -10   4  270.20   18.39
   1 -10   4  276.42   15.09
  -1  -5  11   28.26    9.05
  -1  -5  11   24.30    5.31
   1   5 -11   21.48    4.87
   1 -10   2   -0.88    3.02
   1 -10   2   -1.09    2.35
  -2  -8   7   13.21    5.10
  -2  -8   7   11.94    4.59
  -6   8  -4  132.90   13.78
   6  -8   4  102.34   15.11
  -3  -5  10    6.08    4.10
  -3   8   5  373.48    4.67
   3  -8  -5  379.57    8.89
   3  -8  -5  358.58   16.60
   4  -4   9 1109.35   44.36
  -4   4  -9 1161.09   42.24
   2 -10   5  107.49   15.08
   2 -10   5  115.70   15.13
   7  -7  -2   20.36    8.18
  -7   7   2   17.86    9.42
   7  -7  -2    3.49    5.56
  -5   7  -7  398.86   21.91
   5  -7   7  409.19   27.32
  -2  -6  10  448.54   23.76
  -2  -6  10  441.04   28.13
   7  -6  -4   49.52   14.47
   7  -6  -4   81.94    9.98
   7  -6  -4   88.46   15.14
  -5  -3   9   40.89   10.68
  -5   9   2   -3.59    3.28
   5  -9  -2    8.74    3.98
   5  -9  -2    4.74    5.68
   3 -10   0 1668.70   15.35
   3 -10   0 1643.33   59.18
  -1  -9   1  414.92   22.52
  -1  -9   1  426.95   23.51
   6  -3   6    9.25   11.77
  -6   3  -6    9.71    6.17
   4 -10   1    1.85    1.58
   4 -10   1    8.35    6.96
   4 -10   3   88.79   16.21
   4 -10   3   54.86   18.26
  -3  -3  11  439.43   23.55
   3   3 -11  409.26   21.66
  -2   3  10   87.06   10.46
   2  -3 -10   79.63   11.54
   7  -7   2   26.45   13.78
  -7   7  -2   36.47   13.55
  -3   0  -9  556.13   30.91
   3   0   9  471.15   31.41
   0  -7  10  686.75   38.19
   0  -7  10  702.89   25.35
   0   7 -10  683.62   25.42
   7  -4  -6  367.27   18.87
   7  -4  -6  379.50   16.75
   7  -4  -6  367.54   16.97
  -5   1  -7  713.03   26.76
   5  -1   7  640.40   39.25
   6  -6  -6  744.05   26.28
   6  -6  -6  749.95   26.94
   6  -6  -6  819.44   31.55
   1  -7  10    2.30    3.29
  -1   7 -10    3.42    2.79
   1  -7  10    4.04    2.32
  -2  -7   9  436.65   24.30
  -2  -7   9  447.52   23.63
  -2  -7   9  471.10   27.37
   2   3   8    7.02    8.54
  -2  -3  -8   52.19   15.90
   3  -3 -10  154.73   13.39
  -3   3  10  151.40   11.07
   0  -8   9   81.93    9.83
   0  -8   9   85.57   11.53
   0  -8   9   88.68   12.03
  -1  -4  -8  142.23   11.48
   1   4   8  152.24   19.74
   1   4   8  154.20   11.42
  -4   5  -9   16.75    5.69
   4  -5   9   11.38    8.18
   4  -9  -3  167.01   15.09
   4  -9  -3  163.58   12.47
   1   5   7   23.84    5.16
  -1  -5  -7   27.17    7.86
   1   5   7   17.49   16.72
  -3  -6  -3 1006.90   37.57
  -3  -6  -3  993.65   37.13
   2  -9  -3    0.04    1.18
   2  -9  -3   -3.36    3.43
  -2   9   3    0.21    1.31
   5  -6  -7  556.62   30.57
   3  -4  10   11.53    7.63
  -3   4 -10   27.14   11.45
   2  -1 -11   -3.94    3.95
   2  -1 -11    2.14    1.61
  -2   1  11   -0.04    1.24
   0   0  11   55.21   14.82
   0   0 -11   63.50   18.06
   0   0 -11   73.95    9.23
  -1  -9   6    0.23    3.12
  -1  -9   6    0.26    1.86
   1   9  -6   -1.35    2.29
   6  -8  -3  186.91   17.70
   6  -8  -3  115.92   13.73
  -6   8   3  131.04   11.96
  -5  -4  -2   87.85   13.13
  -5  -4  -2   91.05   11.39
   6  -5  -7  251.97   13.00
   6  -5  -7  252.19   13.87
   4  -3   9  350.10   26.19
  -4   3  -9  318.80   18.69
  -2  -5  -6  309.09   15.14
  -2  -5  -6  349.68   17.40
   1  -7  -6   69.98    8.79
   1  -7  -6   77.74   14.63
  -1   7   6   59.46   14.97
   2 -10   0   25.45    7.27
   2 -10   0   22.52    8.32
   3 -10   5  629.61   26.18
   3 -10   5  592.84   14.22
   4  -8  -5  169.37   13.99
  -4   8   5  171.63   13.21
   4  -8  -5  217.98    3.11
   2  -8   9    5.21    5.30
  -2   8  -9    2.94    2.32
   1  -5  11  373.05   18.97
  -1   5 -11  374.14    5.95
   1  -5  11  395.52   21.04
  -7  -1   0    2.05    2.05
  -7  -1   0    1.72    2.00
  -3   3 -10  118.54   10.61
   3  -3  10  144.70   17.70
   6  -6   6    4.77   10.78
  -6   6  -6    8.74    5.82
   5   0 -10  111.51   13.71
   5   0 -10  104.60   12.89
   5   0 -10  121.32    9.20
  -5   0  10  122.19    9.20
  -2   8   5   20.10    5.93
   2  -8  -5   22.31    4.98
   2  -8  -5   24.66    8.63
  -4  -5   9  237.96   13.17
  -7   4  -4  388.80   22.43
   7  -4   4  349.98   33.81
   1 -10   5  207.61   19.13
   1 -10   5  202.58   15.89
  -2  -7  -3  606.46   22.83
  -2  -7  -3  544.48   30.82
   5  -5  -8  494.08   26.93
  -3  -3  -7  140.35   11.51
   3   3   7  112.70   22.10
   1 -10   1    2.63    3.24
   1 -10   1    0.20    1.77
   6   2  -8  127.27    9.18
  -6  -2   8  125.55   10.53
  -4   0  -8  215.02   17.06
   4   0   8  208.37   24.72
   3  -5  10  895.76   35.46
  -3   5 -10  925.78   33.86
  -5   9  -5  732.46   31.50
   5  -9   5  692.15   27.50
   3   4   6 1212.59   53.98
  -3  -4  -6 1068.58   38.56
   7  -5   4  296.11   23.84
  -7   5  -4  356.42   17.88
   5  -7  -6    3.05    3.35
   6   3  -7  157.15   11.64
  -6  -3   7  167.27   12.24
  -6  -3   7  173.97   13.77
   4 -10   0   29.39   10.50
   4 -10   0   22.54    5.96
   5   1 -10  115.51   13.50
   5   1 -10  117.73    8.88
   5   1 -10  108.80   12.53
  -5  -1  10  119.21    9.02
  -2   0 -10   -0.14    2.48
   2   0  10   -3.14    5.75
  -3  -7  -1  140.88   11.49
  -3  -7  -1  135.26   10.98
   4 -10   4   20.37   10.06
   4 -10   4   16.79    7.47
   1  -1 -11  673.15   28.55
  -1   1  11  699.06   25.53
   1  -1 -11  726.77   27.78
   7  -2  -7  132.66   12.36
  -7   2   7  124.87   10.79
   7  -2  -7  138.66   10.37
   7  -2  -7   92.67   10.59
   6  -7  -5   -0.60    0.98
   6  -7  -5    0.84    0.68
   6  -7  -5    2.57    4.13
  -6  -4   3   38.75   13.87
   6   4  -3   29.89    4.88
  -6  -4   3   18.01    5.02
   6  -9   1  239.70   12.76
   6  -9   1  271.00   19.06
   6   4  -4   82.39   10.74
  -6  -4   4   73.46    9.64
  -6  -4   4   83.56   11.24
  -7   1   7    0.51    0.94
   7  -1  -7    5.63    2.40
   7  -1  -7    6.83    5.63
   7  -1  -7    4.23    2.34
  -3   1  11  159.88   11.73
   3  -1 -11  168.69   14.43
  -3   1  11  161.09   12.48
   3  -1 -11  169.36   14.29
  -5   4  -8  144.13   11.71
   5  -4   8  160.40   19.92
   1  -9   8   98.08   11.55
   1  -9   8   89.62   12.53
   1  -9   8   92.70   12.80
   1  -1  11    5.47    4.10
  -1   1 -11   20.00    6.40
  -5  -5   0    0.55    1.63
  -5  -5   0   -0.19    2.92
  -5   1  10   79.74    9.35
   5  -1 -10   89.61   10.72
  -5   1  10   80.86   10.37
   5  -1 -10   87.36   10.32
   8  -3  -2    4.23   13.87
  -8   3   2   -0.33    1.86
  -5   5  -8    8.35    4.89
   5  -5   8    4.97    7.76
  -1  -3  -9  136.48   10.75
   1   3   9  126.38    9.34
   1   3   9  107.62   18.19
  -4  -4  10    2.98    2.17
   1  -3 -10  107.78   13.01
  -1   3  10   86.45   11.33
  -1   3  10  109.80   12.82
   6  -9   0  148.92   17.26
   6  -9   0   85.03   10.78
   7  -3   4  327.40   35.40
  -7   3  -4  295.04   17.20
  -4  -5  -3  923.81   33.67
  -4  -5  -3  902.18   35.38
   2  -9   8  198.96   16.33
   2  -9   8  194.96   16.96
  -1  -6  -6   23.41    6.64
  -1  -6  -6   15.85    5.03
   1   6   6   15.99    4.94
   6  -9   2   30.45    4.61
   6  -9   2   61.87   19.09
   7   1  -6  354.33   16.45
  -7  -1   6  368.09   18.76
  -7  -1   6  384.70   21.00
  -5  -2  -5   20.63    6.19
   5   2   5  -10.05   12.98
  -8   3   1   56.07   14.91
   8  -3  -1   30.82   12.38
   5   5  -7  126.96   10.00
  -5  -5   7  136.54   12.30
  -5  -5   7  135.64    9.89
   8  -4  -1  541.62   40.86
  -8   4   1  519.98   28.23
   7  -7  -3    6.29    7.25
   7  -7  -3    2.91    4.09
  -3  -7   8    0.45    0.41
  -3  -7   8    1.39    1.95
  -3  -7   8    0.88    0.77
   8  -4  -2  158.61   20.29
  -8   4   2  207.14   18.00
  -1  -7  10  219.89    3.90
  -1  -7  10  236.07   12.62
  -1  -7  10  218.40   11.90
  -6  -3  -1  182.76   15.27
  -6  -3  -1  181.99   16.63
   4  -6   9   10.96    6.87
  -4   6  -9   22.28    7.11
  -6   2  -6   86.80   17.96
   6  -2   6   42.92   20.35
  -4  -6  -1   21.43    8.02
  -4  -6  -1   22.57    6.21
   6  -1  -9    1.59    1.35
   6  -1  -9    1.84    1.40
   6  -1  -9    1.04    1.12
  -2  -5  11   82.91    9.68
  -2  -5  11   79.16   12.10
  -6  -4   2  216.51   20.56
  -6  -4   2  219.41    6.03
  -7   0  -2   28.80   10.05
   7   0   2   16.82   17.75
   6   0  -9  126.75    9.32
  -6   0   9  127.88   10.78
   6   0  -9  131.66   10.22
   6   0  -9  133.54    9.86
   6  -4  -8  227.06   12.68
   6  -4  -8  259.52   13.30
   6  -4  -8  241.63   11.13
   2 -10   6 1429.49   57.79
   2 -10   6 1554.36   56.86
  -7  -2   3  420.63   23.42
  -7  -2   3  411.06   24.35
  -3  -2  -8  229.15   12.33
   3   2   8  216.07   26.19
   2  -7  10   73.18   11.73
  -2   7 -10  101.83   12.17
   8  -3  -3  546.00   35.97
  -8   3   3  634.48   23.95
   7  -1   3   63.07   23.31
  -7   1  -3   80.81   11.23
   7  -7   3    9.77    9.02
  -7   7  -3   24.31   10.97
  -6  -4   5   45.33   11.60
   6   4  -5   40.65   10.56
  -6  -4   5   44.37   12.40
  -2  -2  -9    3.91    2.10
   2   2   9   -2.90    7.69
   4  -2   9  108.09   21.47
  -4   2  -9  119.61   11.42
  -5   3  -8  271.77   14.75
   5  -3   8  264.37   26.19
   0   5   8  498.98   26.56
   0  -5  -8  516.14   27.79
   0   5   8  481.10   29.85
  -3   2 -10   95.56   16.62
   3  -2  10   95.22   18.48
  -5  -1  -6  461.49   25.24
   5   1   6  395.60   36.34
  -3  10   1   -0.93    2.66
   3 -10  -1   -0.97    3.94
   3 -10  -1    0.62    0.90
  -4   3  10    1.53    0.57
   4  -3 -10    7.52    3.74
   4  -3 -10    4.58    2.37
   4   1 -11    1.97    1.71
  -4  -1  11    7.74    3.89
  -4  -1  11   -0.51    1.35
   4   1 -11    4.79    2.39
  -1  -9   0   12.74    4.81
  -1  -9   0   16.08    6.55
  -3  -8   4   59.37   15.89
  -3  -8   4   53.02   14.69
   3   8  -4   48.75   12.64
   7  -3  -7  276.20   13.09
   7  -3  -7  262.22   13.49
   7  -3  -7  273.65   15.07
  -2  -8  -1   13.51    4.54
  -2  -8  -1    4.17    3.23
   8  -2  -2   -6.43   21.42
  -8   2   2    6.16    4.27
  -7  -2   4  642.98   25.12
   7   2  -4  568.73   30.24
  -7  -2   4  593.64    7.77
   0  -6  11  840.79   29.85
   0  -6  11  822.97   31.35
   0   6 -11  868.68   31.63
   4   7  -4  444.04   23.85
  -4  -7   4  433.27   24.25
  -4  -7   4  431.50   29.79
   0  -8  -4  256.45   13.27
   0   8   4  241.80   11.95
   0  -8  -4  258.67   12.81
  -3  -4  11  126.68   13.09
   7   0  -7   54.71   14.95
  -7   0   7   53.58   13.63
   7   0  -7   48.78   13.01
  -4  -6   8   12.83    4.65
  -3  -8   3   96.96   13.21
  -3  -8   3   93.24   12.82
  -7   6  -4    4.58    4.46
   7  -6   4   13.54    9.67
   8  -4   0   81.20   22.62
  -8   4   0   82.20   13.73
  -6  -1  -4  293.79   16.16
   6   1   4  249.80   25.68
  -7  -2   2  115.10   16.94
  -7  -2   2  109.43   14.72
  -4   8  -8    1.32    1.65
   4  -8   8   -0.61    5.34
  -2  -6  -5   14.34    5.29
  -2  -6  -5   13.39    3.70
  -4  -7   3   40.74   14.92
  -4  -7   3   36.95   10.48
   4   7  -3   29.23    6.39
  -4   0  11   52.23   13.39
  -4   0  11   57.37   15.65
   4   0 -11   59.81   15.06
   4   0 -11   32.72    8.51
  -5  -3  -4 1127.22   49.40
  -5  -3  -4 1055.05   38.79
  -3  -5  -5  378.14    8.99
  -3  -5  -5  366.37   19.93
   8  -2  -3  160.97   48.55
  -8   2   3  152.97   12.37
   3  -6  -8    6.98    4.20
   8  -4  -3   44.07   16.86
  -8   4   3   51.63   17.43
  -5  -2  10   46.78   11.85
   0 -10   3   57.45   15.00
   0 -10   3   55.63   14.62
  -1  -8   9   48.93   12.22
  -1  -8   9   47.12   12.43
  -1  -8   9   65.43    4.47
   8  -3   0    1.67   11.69
  -8   3   0    7.19    4.81
  -6   9   1 1086.27   42.71
   6  -9  -1 1094.49   40.07
   6  -9  -1 1094.65   42.95
   0 -10   4    5.68    3.27
   0 -10   4    5.13    3.29
   1 -10   6  384.57   21.85
   1 -10   6  383.15   25.91
   5  -4  -9   22.93    6.19
   0  -6  -7  213.48   16.90
   0   6   7  241.04   11.37
   0  -9   8  186.72   13.65
   0  -9   8  178.35   14.02
   0  -9   8  185.71   15.04
   8  -2  -1  181.24   23.00
  -8   2   1  216.30   16.56
  -1  -9   7  752.51   30.15
  -1  -9   7  761.96   33.79
  -1  -9   7  715.14   26.34
  -6   8  -5   46.20   19.42
   6  -8   5   29.57   10.06
  -3  -8   5    0.59    2.77
   3   8  -5    1.43    1.77
  -3  -8   5    0.78    1.80
   3  -6  10    5.17    7.03
  -3   6 -10    7.60    4.56
   8  -5  -1   -0.47    9.68
  -8   5   1    1.65    2.05
   5  -6   8  410.81   26.23
  -5   6  -8  474.88   25.65
   6  -2  -9   75.84   10.62
  -6   2   9   98.30   11.32
   6  -2  -9   97.48   12.16
   6  -2  -9   88.99   10.27
   2  -4  11   11.43    7.62
  -2   4 -11   19.38    7.35
   0  -4  -9  149.52   11.69
   0   4   9  108.13   15.69
   0   4   9  146.86   10.98
   6  -9   3   81.47   12.67
  -4  -7   5    6.03    2.79
  -4  -7   5    8.45    4.25
   4   7  -5    7.59    3.62
   1 -10   0  287.94   16.82
   1 -10   0  299.94   15.25
  -5   9   3    7.86    4.07
   5  -9  -3   17.34    4.66
   5  -9  -3   18.52    8.07
   4   2 -11    6.67    2.55
  -4  -2  11    2.37    1.88
  -4  -2  11    3.24    2.29
  -2  -8   8    9.67    5.42
  -2  -8   8   14.55    4.09
  -2  -8   8    9.86    3.88
   7  -8   0   50.70   14.05
   7  -8   0   71.15   16.73
  -6   0  -5   15.55    4.96
   6   0   5    4.31   11.86
   1  -9  -3    3.66    3.63
   1  -9  -3    7.97    4.48
  -1   9   3    4.32    2.30
  -2   3 -11   36.28    9.86
   2  -3  11   42.46   14.07
  -4   9  -7  126.96   13.54
   4  -9   7  122.42   12.21
   7  -5  -6    5.76    4.17
   7  -5  -6    6.81    2.71
   7  -5  -6   -0.17    3.42
   2 -10  -1    7.89    5.04
   2 -10  -1   14.72    4.54
   7  -6  -5    5.83    8.30
   7  -6  -5    0.53    2.84
   7  -6  -5    0.02    0.30
   3 -10   6   80.02   13.63
   3 -10   6   76.50   11.28
   4 -10  -1   66.77    7.95
   4 -10  -1   65.13    8.70
  -4  10   1   28.70    6.79
   5 -10   2 1461.09   53.81
   5 -10   2 1374.75   51.72
   0  -9  -2  467.02   25.85
   0  -9  -2  502.92   26.88
   6  -7   6  120.61   18.94
  -6   7  -6  141.18   12.54
   4 -10   5  349.91   22.55
   4 -10   5  312.80   20.51
   8  -5  -2  501.08   36.91
  -8   5   2  385.85   22.38
   5  -2 -10  712.41   25.46
   5  -2 -10  645.19   24.47
  -5   2  10  671.47   25.44
  -5   2  10  647.39   22.98
   7  -8   1   46.80   13.86
   6   1  -9   26.26    5.86
  -6  -1   9   28.55    6.22
   6   1  -9   20.75    5.56
   1  -6  11    8.35    3.64
   1  -6  11    3.81    4.84
  -1   6 -11    3.60    2.67
   3  -5  -9    1.74    2.62
   5 -10   1   19.93    5.51
   5 -10   1   25.68   10.52
  -1  -8  -3    0.34    1.30
  -1  -8  -3    0.24    1.44
   5  -8  -5   -0.70    3.65
   5  -8  -5    4.83    1.83
  -5   8   5    3.00    3.24
  -7  -1  -1  327.17   17.72
  -7  -1  -1  377.36   11.26
  -1  -6  11   45.14   11.29
  -1  -6  11   42.35   15.50
   1   6 -11   35.99   10.26
  -6  -2  -3   10.54    5.72
   8  -5   0   12.71   11.23
  -8   5   0   -0.70    3.32
  -3   7   7   13.12    4.17
   3  -7  -7   38.88   11.87
   0 -10   2  389.96   23.93
   0 -10   2  385.74   21.52
  -2   6   8   90.00   12.52
   2  -6  -8  122.05    9.92
   7   2  -5  346.13   16.29
  -7  -2   5  355.88   16.87
  -7  -2   5  354.31   18.06
  -3  -8   2   44.77   11.77
  -3  -8   2   50.71   16.36
  -8   3   4   17.54    5.88
   8  -3  -4    9.29    7.52
  -1   8   5   31.79    9.92
   1  -8  -5   39.79   12.05
   1  -8  -5   39.55   11.57
  -6  -4   1   -0.69    2.67
  -6  -4   1   -0.75    1.79
  -7   2  -4  347.44   17.64
   7  -2   4  363.33   35.91
  -3   8  -9  460.74   25.90
   3  -8   9  559.64   33.47
  -4  -7   2   73.42    9.53
  -4  -7   2   80.78   10.57
  -4  -3  -6  166.24   13.04
   4   3   6   97.80   18.82
   7  -8  -1  110.89   19.37
   7  -8  -1   36.46   10.39
  -5   8  -7   56.64   18.81
   5  -8   7   20.74    7.39
   0 -10   5   90.64   11.87
   0 -10   5  123.29   11.55
  -6   8   4  522.23   29.88
   6  -8  -4  573.97   30.90
   6  -8  -4  575.27   32.55
   4  -6  -8   68.95   10.00
  -8   2   4  498.61   27.13
   6   4  -6  351.18   16.86
  -6  -4   6  349.77   17.11
  -6  -4   6  369.32   18.64
  -3   9   4 1144.25   40.76
   3  -9  -4 1310.62   48.23
   3  -9  -4 1194.85   42.41
  -3   9  -8  488.90   28.48
   3  -9   8  510.83   29.48
   2  -5  -9  224.34   11.82
   5 -10   3  389.36   23.08
   5 -10   3  430.82   28.00
   1   2 -12    5.14    3.33
  -1  -2  12    0.83    2.08
  -1  -2  12    2.68    1.32
  -7  -2   1    0.20    1.76
  -7  -2   1   -0.57    1.57
   0   1  11    4.10    4.57
   0  -1 -11    6.21    6.98
   0  -1 -11   -0.37    1.96
  -1  -3  12    1.01    2.14
   1   3 -12    3.79    2.72
  -1  -3  12    6.37    2.57
  -2   5 -11    0.36    1.03
   2  -5  11   -3.33    5.46
  -5  -4   9  192.71   14.57
  -2   2  11   79.34   10.88
   2  -2 -11   46.06   13.34
   2  -2 -11   77.97   12.03
   4   2   7    4.07    9.98
  -4  -2  -7   -1.64    2.76
   5   0   7   12.63   16.54
  -5   0  -7   15.13    6.34
  -8   4  -1  177.38   14.55
   8  -4   1  145.21   25.08
  -2  -9   4   95.76   11.46
  -2  -9   4  108.02   17.12
   4  -1 -11 1203.67   45.35
  -4   1  11 1098.04   39.46
  -4   1  11 1156.14   41.71
   4  -1 -11 1120.11   40.25
  -8   2   0  597.61    8.17
   8  -2   0  616.89   35.69
  -5   2  -8  452.29   25.61
   5  -2   8  415.04   33.22
   5 -10   0  499.04   27.16
   5 -10   0  540.43   31.30
   7  -8   2  344.91   22.44
  -7   8  -2  344.99   22.33
   4  -7  -7    3.48    3.14
  -2  -9   3  123.88    9.82
  -2  -9   3  124.11    9.82
  -2  -2  12    3.15    1.60
   2   2 -12    4.22    2.16
  -2  -2  12    8.44    3.61
  -8   1   2 1263.89   46.27
  -3  -8   6    0.04    2.03
  -3  -8   6    1.11    1.30
   3   8  -6    3.02    3.02
   1   2  10   33.03   10.56
   1   2  10   24.85   11.07
  -1  -2 -10   34.19    9.55
  -8   1   3    1.30    1.85
  -8   1   3    0.92    1.93
  -8   4   4    9.60    4.65
   8  -4  -4    3.37    6.70
   2  -2  11   -0.40    4.83
  -2   2 -11    3.09    2.08
  -8   5   3  169.58   15.25
   8  -5  -3  143.10   16.09
  -1   0 -11  361.42   18.00
   1   0  11  344.79   19.70
   4   7  -6  179.90   13.61
  -4  -7   6  192.36   14.84
  -4  -7   6  198.30   14.74
   5   6  -4   10.38    4.31
  -5  -6   4    8.85    4.50
  -5  -6   4    9.75    4.14
   4  -9  -4  292.65   14.32
   4  -9  -4  294.81   16.58
   3  -2 -11    4.62    2.58
  -3   2  11    2.21    1.22
   3  -2 -11   -0.26    2.90
   5  -9   6  331.20   18.23
  -5   9  -6  345.68   18.23
  -2   7   7    5.40    2.39
   2  -7  -7    5.84    4.48
  -1  -7  -5 1117.95   40.41
  -1  -7  -5 1033.19   37.02
   7  -4  -7  666.61   23.68
   7  -4  -7  664.82   27.63
   7  -7  -4   72.98   10.24
   7  -7  -4   85.40    9.99
  -4   7  -9  611.55   23.50
   4  -7   9  617.70   26.11
  -5  -5  -1   30.84    4.55
  -5  -5  -1   28.18   11.35
   4  -5  -9   59.18   15.44
  -8   3  -1   65.23    8.72
   8  -3   1   70.70   19.43
  -4  -4  -5   62.80   18.19
  -4  -4  -5   51.66   17.16
  -5  -6   3  598.70   21.89
  -5  -6   3  579.38   33.70
  -3  -1  -9   49.19   13.01
   3   1   9   15.93    9.15
   8  -5   1   17.99   13.37
  -8   5  -1   37.42   12.96
  -6  -3   8   24.99    9.00
   6   3  -8   25.57    5.66
  -2  -9   5   41.24   13.81
   2   9  -5   43.05   11.63
  -2  -9   5   49.68   13.21
  -3  -6  10    1.29    1.59
   7   1  -7    1.84    0.93
  -7  -1   7    1.98    1.24
  -7  -1   7    1.61    1.43
   6  -9  -2   57.36   17.52
  -6   9   2   33.32   11.12
   6  -9  -2   57.51   17.94
   0   3 -12   21.38    7.32
   0  -3  12   17.00    4.35
   0  -3  12   22.97    8.31
  -3   1 -10  313.34   18.68
   3  -1  10  255.54   19.89
   0  -7  -6  224.33   11.96
   0  -7  -6  225.71   11.90
   0   7   6  222.39   11.86
   2   3 -12    3.08    2.32
  -2  -3  12    2.25    1.45
  -2  -3  12    5.83    4.71
  -2  -1  12  198.06   15.96
  -2  -1  12  176.50   13.42
   2   1 -12  192.22   16.41
   2   1 -12  168.42   12.56
  -4  -3  11   88.32   11.87
  -5  -4  -3   34.36   11.42
  -5  -4  -3   35.45   12.47
   6  -5   7 1044.24   45.30
  -6   5  -7 1083.05   42.88
   6  -4   7  270.21   23.88
  -6   4  -7  282.41   16.56
   0 -10   1    0.70    1.36
   0 -10   1   -0.37    2.47
   1   1 -12  453.47   24.39
  -1  -1  12  434.31   23.09
   1   1 -12  432.32   25.84
  -1  -1  12  452.75   24.81
  -5  -6   5  128.39   13.61
   5   6  -5  127.71    9.75
  -5  -6   5  142.48   10.95
  -6   1  -6    0.23    1.05
   6  -1   6    0.70   11.97
  -7   7  -4  178.44   14.64
   7  -7   4  186.27   18.65
  -6   9  -4  171.01   13.01
   6  -9   4  158.07   15.90
   2  -9  -4   -1.44    3.09
   2  -9  -4    1.21    1.05
  -2   9   4    1.61    1.33
   4  -1   9    3.18    9.16
  -4   1  -9    8.89    5.27
  -5  -5   8   59.00   15.20
  -1  -4  12   16.33    4.96
  -1  -4  12   23.86    8.26
   1   4 -12   21.77    6.32
  -8   1   1  110.09   13.83
   8  -1  -1  117.72   21.67
   6  -3  -9  135.83   10.24
   6  -3  -9  123.34   11.21
   6  -3  -9  147.72   12.09
  -6   3   9  133.77   10.02
   0   3  10    1.70    1.35
   0  -3 -10   -0.53    2.32
   0   3  10    2.55    3.99
   7  -8  -2  946.85   37.28
  -7   8   2  950.25   37.67
   7  -8  -2  957.77   35.43
   8  -6  -1   65.33   13.35
  -8   6   1  101.70   12.51
   2 -10   7  353.42   18.74
   2 -10   7  355.22   25.03
  -3  -7  -2   30.54    6.74
  -3  -7  -2   24.21    7.90
  -8   1   4   90.56   11.33
  -8   1   4   92.31   14.29
   1  -8  10  289.03   13.12
   1  -8  10  298.41   17.43
  -1   8 -10  263.68   11.23
   3  -4 -10  112.85   12.92
  -2  -9   2    0.40    0.93
  -2  -9   2    2.96    2.99
   0   2 -12  236.14   16.64
   0  -2  12  244.62   16.45
  -7   4  -5  111.31   11.92
   7  -4   5  108.72   21.79
  -3  -8   1   45.17   12.00
  -3  -8   1   44.83   13.98
   6  -6  -7    8.20    6.09
   3 -10  -2  548.03   21.84
  -3  10   2  495.38    9.48
   3 -10  -2  566.84   23.60
  -7   5  -5    0.54    2.89
   7  -5   5    9.67   13.38
   8  -6   0  355.09   25.01
  -8   6   0  398.07   21.72
  -5  -3  10    6.00    3.54
   1  -2 -11   35.67   13.35
  -1   2  11   22.28    6.96
   1  -2 -11   33.96    7.81
  -5   7  -8   28.23    9.13
   5  -7   8   10.88    9.27
   5 -10   4    2.94    3.67
   5 -10   4   -0.82    6.55
  -2  -7  10  113.40   13.83
  -2  -7  10  117.88   10.59
  -7  -2   6    1.16    1.31
   7   2  -6    0.65    0.96
  -7  -2   6    0.74    1.46
   0 -10   6  623.72   23.69
   0 -10   6  607.05   29.73
  -1  -9  -1   43.30   11.07
  -1  -9  -1   28.07    8.53
   0   4 -12  103.28   13.34
   0  -4  12  132.36   17.59
   0  -4  12  108.54   10.06
  -4  -7   1   -0.51    1.52
  -4  -7   1    0.41    2.55
   2   1  10    5.44    5.93
  -2  -1 -10    6.53    3.86
   3  -8  -6  241.73   17.85
  -3   8   6  201.67   12.93
   3  -8  -6  253.99   15.90
  -6  -3  -2  149.83   14.25
  -6  -3  -2  154.39   17.56
   6   2  -9    0.01    0.28
  -6  -2   9   -0.70    1.62
   2  -4 -10   23.44    9.20
  -2   4  10   17.03    5.36
  -2   4  10    7.08    3.06
  -3  -6  -4   77.86   15.22
  -3  -6  -4   65.18   16.66
   1 -10   7    8.88    5.44
   1 -10   7    4.16    3.93
   7  -1  -8   19.74    7.54
  -7   1   8   22.04    6.80
   7  -1  -8   12.18    5.84
   7  -1  -8   14.82    3.65
  -5  -6   2  617.18   22.01
  -5  -6   2  645.16   26.18
   8  -3  -5  124.52   24.18
   0  -8  10  115.07   10.86
   0  -8  10  119.28   12.74
   0  -8  10  137.20   14.03
  -8   2   5    3.53    2.04
  -8   2   5    1.56    1.75
  -8   6   2    8.11    3.70
   8  -6  -2   -0.32    6.20
   1 -10  -1  177.38   12.29
   1 -10  -1  157.47   18.43
  -4  -1  -8  255.89   17.90
   4   1   8  250.01   27.71
   3  -7  10   38.63    8.81
  -3   7 -10   52.55   10.27
   7  -2  -8  147.94   13.16
   7  -2  -8  131.83   11.90
   7  -2  -8  134.16   13.49
  -7   2   8  127.32   12.41
   6  -7  -6  121.66   10.77
   6  -7  -6  130.04   11.39
   6  -7  -6  136.72   14.68
  -4  -6  -2    4.38    3.26
  -4  -6  -2    2.42    2.71
  -3  -7   9   32.94    6.86
  -5  10   1    5.38    5.02
   5 -10  -1    8.55    4.08
   5 -10  -1   -1.50    4.67
  -6  -4   0  336.67   17.87
  -6  -4   0  336.29   18.00
  -4  -5  10  465.72   24.04
  -4  10   2   -0.88    2.60
   4 -10  -2    7.79    6.66
   4 -10  -2    8.54    3.95
  -7  -2   0    2.52    1.77
  -7  -2   0    5.69    2.96
   2  -6  11 1045.27   39.66
  -2   6 -11  960.09   34.52
   1  -9   9  161.72   15.49
   1  -9   9  198.74   16.32
   1  -9   9  166.83   15.18
   7   0   3    4.82   15.40
  -7   0  -3   52.70   11.12
   6  -6   7   31.17    9.96
  -6   6  -7   46.57    9.91
   7  -8   3   55.70   13.92
  -7   8  -3   91.92   18.78
  -3  -5  11    3.43    2.76
   4 -10   6  331.05   19.57
   4 -10   6  353.89   18.06
   6  -3   7   89.11   19.23
  -6   3  -7  147.20   16.04
  -1   6   8   34.33   10.76
  -1   6   8   34.51    5.91
   1  -6  -8   33.05   11.08
  -2  -6  11  476.08   27.85
  -2  -6  11  470.82   20.15
  -2  -9   6    1.65    1.56
  -2  -9   6   -0.10    2.68
   2   9  -6   -0.41    2.25
   4  -8  -6   40.55   11.73
   6  -5  -8  165.48    6.28
   5  -3 -10   32.24    8.84
  -2  -7  -4   93.79   14.07
  -2  -7  -4  101.08   10.19
  -1  -9   8   11.30    4.87
  -1  -9   8    6.53    3.01
  -1  -9   8    4.76    4.27
  -1   5   9   23.18    8.66
  -1   5   9   39.23    6.64
   1  -5  -9   44.68    9.32
  -6  -4   7   42.99    9.50
   6   4  -7   51.36    8.74
  -6  -4   7   54.37   10.36
  -8   2  -1  115.81   14.72
   8  -2   1   77.25   21.41
   8  -5  -4   32.60   10.88
   8  -5  -4   38.75   12.85
   8  -5  -4   44.74    8.19
  -2  -8  -2   57.55    9.24
  -2  -8  -2   65.59   17.48
  -8   6  -1   45.90   14.18
   8  -6   1   15.40   11.44
  -5  -6   6  148.46   15.20
   5   6  -6  149.22   13.77
  -5  -6   6  145.67   12.99
  -7   3  -5   60.60   15.91
   7  -3   5   24.41   15.47
   8  -4   2   37.93   16.27
  -8   4  -2   29.53    9.77
  -7   6  -5    2.86    4.19
   7  -6   5    7.20   12.46
  -2  10   2  254.16   16.73
   2 -10  -2  282.55   13.00
   2 -10  -2  287.95   14.70
   3 -10   7   21.57    9.15
   3 -10   7   18.14    9.86
  -2  -4  12  829.01   30.65
  -2  -4  12  811.56   28.05
  -3  -8   7  147.19   15.87
   3   8  -7  136.39   13.38
  -3  -8   7  155.09   13.76
  -2   0  12  112.78   10.92
  -2   0  12  148.20   15.76
   2   0 -12  115.67   12.72
   2   0 -12  121.64   11.97
   7   0  -8  137.62   13.22
  -7   0   8  159.64   14.91
   7   0  -8  145.54   13.18
  -3  -2  12   41.70   10.58
  -3  -2  12   32.48    5.84
   3   2 -12   36.57    7.31
  -4  -6   9   67.39   11.89
   3   1 -12   10.15    4.62
  -3  -1  12    3.29    2.77
  -3  -1  12    3.63    2.34
   3   1 -12    4.98    3.33
  -4  -7   7  417.09   18.75
  -4  -7   7  414.49   25.16
   4   7  -7  375.68   17.05
   5  -6  -8   -0.40    3.51
   2  -9   9  107.12   12.05
   0  -7  11   27.14    9.27
   0   7 -11   36.67    8.03
   0  -7  11   25.84    8.54
  -8   1   0  176.17   12.29
   8  -1   0  205.61   32.63
   7  -1   4  250.87   29.45
  -7   1  -4  264.14   10.27
  -2   8 -10   20.07    7.93
   2  -8  10   19.90    9.25
  -4   2  11  282.52   12.15
   4  -2 -11  321.24   15.60
   2  -1  11   45.69   11.52
  -2   1 -11   45.37   10.13
   8  -5   2  219.09   22.84
  -8   5  -2  242.92   17.31
   7   1   2    5.65   15.32
  -7  -1  -2    3.63    3.56
   8  -4  -5 1267.25   49.00
   8  -4  -5 1276.27   46.34
  -2   8   6  111.29    9.86
   2  -8  -6  138.21   14.19
   2  -8  -6  142.09   12.61
   4  -4 -10   48.46    8.97
   6  -8   6   10.38    7.88
  -6   8  -6   31.36   12.50
  -8   1   5   50.26   12.83
  -8   1   5   45.65   10.54
  -5   9   4  615.25   23.45
   5  -9  -4  639.81   22.69
   5  -9  -4  678.56   25.90
   5  -7  -7  249.40   17.59
   0   1 -12  358.58   17.02
   0  -1  12  355.13   17.17
  -4  -5  -4  370.19   21.88
  -4  -5  -4  364.04   16.87
   1  -7  11  269.83    7.19
  -1   7 -11  278.71   13.27
   1  -7  11  287.79   20.53
  -2  -9   1   73.12   14.29
  -2  -9   1   68.57   10.48
  -8   0   3   15.26    5.48
  -8   0   3   13.96    5.72
   8  -6  -3  189.55   18.81
   8  -6  -3  198.60   18.70
  -2  -8   9    2.98    1.54
  -2  -8   9    4.71    2.22
  -2  -8   9    4.80    2.79
  -1   0  12   34.39    9.47
   1   0 -12   27.58   10.23
   1   0 -12   23.82    7.10
   0  -5  12    4.38    2.99
   0   5 -12   11.58    5.11
   0  -5  12    6.89    3.00
  -7   3   8  230.21   15.24
   7  -3  -8  225.34   15.71
   7  -3  -8  226.95   14.30
   3 -11   3  460.91   23.06
   3 -11   3  439.05   22.15
   7  -6  -6   96.91   13.61
   7  -6  -6  102.41   11.03
   7  -6  -6  100.50   12.67
   0  -9   9  247.54   20.00
   0  -9   9  242.03   17.08
   0  -9   9  207.36   13.30
  -8   3  -2  187.30   14.54
   8  -3   2  141.39   22.98
   0 -10   0    1.80    1.69
   0 -10   0    1.04    2.78
   1  -7  -7  183.06   12.18
   1  -7  -7  204.18   14.75
  -1   7   7  168.59   11.08
  -5   1  -8  204.40   16.35
   5  -1   8  131.75   20.48
   1   5 -12  303.11   13.49
  -1  -5  12  288.81   12.67
  -1  -5  12  281.32   18.89
   7  -8  -3   67.52   11.02
   7  -8  -3   96.77   16.89
  -7   8   3   87.07   15.36
  -2  -4  -8  207.89   14.34
   2   4   8  210.13   23.99
  -8   0   2   57.41   13.68
  -8   0   2   58.25   14.22
   3 -11   2  137.36   15.72
   3 -11   2  136.91   14.55
  -4   4 -10   67.32   13.45
   4  -4  10   34.65   11.54
  -5  -6   1  352.56   17.55
  -5  -6   1  317.33   14.48
   2 -11   3  747.45   29.15
   2 -11   3  769.36   29.30
  -1   3 -12  163.88   14.98
   1  -3  12  159.02   15.91
   6  -9  -3   46.24   11.98
  -6   9   3   35.85    9.85
   6  -9  -3   52.16    9.57
   2   5   7   -4.69    9.35
  -2  -5  -7    8.92    4.29
   3   3 -12    8.82    3.62
  -3  -3  12    6.92    3.06
  -3  -3  12    3.16    2.44
  -1   4 -12  209.01   13.71
   1  -4  12  216.59   15.74
  -7  -3   3 1306.57   45.65
  -7  -3   3 1354.64   32.18
   5 -10   5  117.67   15.98
   5 -10   5  109.88   12.30
   4  -5  10  142.98   18.56
  -4   5 -10  151.74   16.72
  -8   0   4   16.65    5.92
  -8   0   4   20.11    6.74
   0  -9  -3   43.37    9.48
   0  -9  -3   41.34   10.13
   5  -5  -9  206.63   14.14
   7   3  -4    0.34    0.52
  -7  -3   4    5.49    3.28
  -7  -3   4    1.49    1.14
   1  -4 -10   18.19    6.31
  -1   4  10    2.90    4.01
  -1   4  10   15.42    5.13
  -3   0  12   25.93    8.23
   3   0 -12    9.61    5.03
   3   0 -12   23.69    8.99
  -3   0  12   22.35    7.06
   7  -5  -7   95.31   15.64
   7  -5  -7   87.74   12.11
   7  -5  -7  104.11   13.42
   5   0 -11   21.61    8.07
  -5   0  11   24.73    7.83
  -5   0  11   24.99    7.29
   5   0 -11   28.97    8.64
  -1 -10   4   55.95   11.36
  -1 -10   4   47.16   12.17
   4  -9   8   69.97   12.84
  -4   9  -8   75.00   12.58
   6  -8  -5   93.47   14.13
   6  -8  -5   89.94   14.75
  -4  -4  11    3.59    2.72
  -6   9  -5   16.65    9.56
   6  -9   5    2.71    4.31
   3 -11   4  193.07   13.88
   3 -11   4  198.61   15.84
   2 -11   4   14.59    6.36
   2 -11   4   21.41    8.50
   0 -10   7  268.94    8.86
   0 -10   7  283.46   14.20
   0 -10   7  313.29   19.97
  -3  -8   0    2.36    1.89
  -3  -8   0    5.33    3.41
   2 -11   2   30.37   11.68
   2 -11   2   32.69    9.48
   5   1 -11  349.21   15.28
   5   1 -11  288.61   12.57
  -5  -1  11  349.97   16.33
  -1  -8  10  313.64   22.20
  -1  -8  10  316.67   14.16
  -1  -8  10  318.10   14.77
  -1  -5  -8  420.93   19.64
   1   5   8  420.08   18.33
   1   5   8  460.97   28.73
  -1 -10   3   35.31    7.65
  -1 -10   3   30.06    9.34
   6   0 -10  437.51   19.63
  -6   0  10  430.37   19.91
   6   0 -10  426.31   18.46
   6   0 -10  416.40   18.04
   1  -9  -4   93.00   13.70
   1  -9  -4   85.14   13.79
  -1   9   4   67.16   11.29
  -4  -7   0    1.34    2.38
  -4  -7   0    3.14    2.34
  -1  -7  11  257.99   16.40
  -1  -7  11  247.36   17.32
  -1  -7  11  255.73   17.44
   7  -7  -5  695.78   24.06
   7  -7  -5  724.45   26.49
   7  -7  -5  728.73   28.00
  -6  -1  -5   79.86   11.64
   6   1   5  117.51   22.36
   5   2   6   16.86   15.04
  -5  -2  -6   31.03    9.08
   7   2  -7    4.37    1.37
  -7  -2   7   -0.03    1.73
  -7  -2   7    1.77    1.17
   6  -1 -10   35.98    7.23
   6  -1 -10   53.72   11.97
  -6   1  10   47.57    9.16
   6  -1 -10   42.37    7.47
   8  -6   2   63.20   15.46
  -8   6  -2   58.86    9.78
   0  -8  -5  155.88   16.98
   0  -8  -5  154.88   14.10
   0   8   5  127.74   11.53
  -6   7  -7  204.50   14.49
   6  -7   7  155.49   20.14
  -3  -4  -7   22.56    7.87
   3   4   7    3.85    9.48
   6  -4  -9  293.78   14.24
   6  -4  -9  305.71   14.31
   6  -4  -9  289.59   12.49
  -6   2  -7  172.22   12.34
   6  -2   7  132.01   21.61
   3 -11   1   25.61   10.92
   3 -11   1   27.42    8.68
   6   5  -4 1007.19   35.64
  -6  -5   4 1048.12   41.01
  -6  -5   4 1072.94   38.16
  -2  -9   7  203.58   17.91
  -2  -9   7  177.44   11.68
  -4   3 -10   12.90    6.35
   4  -3  10    7.62    9.71
  -8   0   1    9.90    6.76
  -8   0   1   11.55    5.47
  -4   8  -9    1.32    2.41
   4  -8   9   -2.42    4.42
  -6  -2  -4   80.49   14.90
   6   2   4   23.44   16.76
  -1 -10   5  943.05   34.55
  -1 -10   5  943.18   33.82
   1   1  11   30.30   11.45
  -1  -1 -11   28.22    8.74
   8  -7   0  798.30   34.63
  -8   7   0  730.79   29.24
  -8   2   6  388.70   18.72
   2   3   9   12.08   11.33
  -2  -3  -9    4.81    3.98
  -7  -3   2   -0.23    2.51
  -7  -3   2    0.91    1.11
  -5   5  -9   59.00   10.15
   5  -5   9   37.49   10.08
   6 -10   1    2.70    2.39
   6 -10   1    8.66    8.89
   5 -10  -2    6.66    7.12
  -5  10   2    4.07    4.42
   5 -10  -2   16.35    5.64
  -1  -4  -9  232.08   15.37
   1   4   9  208.98   13.68
   1   4   9  230.78   23.27
  -5   4  -9  125.79   12.25
   5  -4   9  114.18   19.25
   5   3   5   87.96   21.18
  -5  -3  -5   97.47   12.88
   8  -7  -1   26.90   11.91
   5  -8  -6   72.93    9.98
   5  -8  -6   63.32   11.56
  -3   4 -11   81.29   13.74
   3  -4  11   46.49   11.19
   1  -2  12   12.10    6.94
  -1   2 -12   25.76    8.62
   7   1  -8  178.95   11.52
  -7  -1   8  169.33   11.72
   7   1  -8  163.33   15.51
  -7  -3   5  993.85   41.72
   7   3  -5 1071.36   37.06
  -7  -3   5  974.48   35.75
  -5  -5  -2   90.60   13.54
  -5  -5  -2   90.11   13.06
  -6  -5   3    2.98    2.32
  -6  -5   3    5.23    3.89
  -3   0 -10  205.69   14.21
   3   0  10  169.48   18.48
   0   2  11   10.43    4.37
   0  -2 -11   11.66    5.19
   0   2  11    8.41    5.96
  -5  -6   7  257.84   16.31
   5   6  -7  243.26   16.30
  -5  -6   7  253.29   18.91
  -1  -8  -4  188.08   13.24
  -1  -8  -4  179.42   12.55
   3   3   8    4.54   10.99
  -3  -3  -8    3.90    4.02
   7  -2   5  100.67   22.65
  -7   2  -5  116.90   12.79
   6 -10   2   27.73   11.02
   6 -10   2   58.62   13.12
  -5   9  -7   90.76   15.57
   5  -9   7   46.74   10.73
   7  -8   4   66.55   13.67
  -7   8  -4   88.13   18.35
   4 -11   2   49.85    9.57
   4 -11   2   50.77   14.88
   3  -3 -11  105.06   10.13
  -3   3  11  102.86    9.50
   7  -7   5    8.74    8.96
  -7   7  -5   12.87    7.11
   8  -3  -6   18.61    9.84
   8  -3  -6    5.15    4.11
   2  -3 -11   27.33    8.35
  -2   3  11   26.01    9.19
   5  -1 -11   40.23    8.80
  -5   1  11   32.55    7.62
  -5   1  11   29.26    9.46
   5  -1 -11   28.63    9.99
   4 -11   3  764.89   28.58
   4 -11   3  692.28   29.18
   7  -9   1  169.23   13.19
   7  -9   1  185.59   18.13
   1   6   7 1092.82   38.31
  -1  -6  -7 1090.23   38.86
   1  -5  12   -0.30    3.38
   1  -5  12    5.72    2.61
  -1   5 -12    8.09    3.67
   7  -9   0   22.54   11.74
   7  -9   0    6.47    5.06
   6   5  -5  249.32   16.15
  -6  -5   5  243.21   15.80
  -6  -5   5  231.89   19.79
  -7  -2  -1  126.85   12.20
  -7  -2  -1  141.53   13.94
   5  -8   8   44.31   11.15
  -5   8  -8   53.38    9.94
  -6  -1  10    0.63    1.45
   6   1 -10    1.81    1.07
  -1 -10   2   57.33    4.67
  -1 -10   2   57.43    9.02
   3  -5  11   90.77   17.94
  -3   5 -11   62.03   13.84
  -4   6 -10  101.01   10.73
   4  -6  10   61.75   11.12
  -4   0  -9  603.35   22.12
   4   0   9  595.80   34.27
  -8   1  -1   55.31   14.23
   8  -1   1   19.73   16.36
   2 -10   8   20.91   10.50
   2 -10   8   16.13    7.15
   8  -5  -5    3.28    1.01
   8  -5  -5   -1.42    6.04
   8  -5  -5    3.73    5.82
  -6  -3   9    9.23    4.40
   3  -9  -5   42.90    9.76
  -3   9   5    8.48    3.96
   3  -9  -5   37.05    7.27
   3  -9   9  181.51   14.88
  -3   9  -9  188.30   15.18
   8   0  -5  372.46   16.76
  -8   0   5  406.66   20.17
  -8   0   5  408.55   21.46
   2 -11   5   70.47   13.86
   2 -11   5   59.88   11.48
   6 -10   0   74.46   14.80
   6 -10   0   91.01   16.39
  -5  -5   9  194.60   13.51
  -5  -4  10    7.79    4.69
  -6  -4  -1  100.67   16.34
  -6  -4  -1  100.84   20.69
   5   1   7   -1.16   10.86
  -5  -1  -7    2.43    1.55
  -8   2  -2    0.42    2.67
   8  -2   2    5.10   14.34
   2 -11   1   16.57    5.39
   2 -11   1   16.24    7.41
   8  -7   1   93.61   19.81
  -8   7  -1  113.10   16.15
  -6   0  -6  390.51   19.83
   6   0   6  260.82   29.12
   3  -3  11  688.04   29.06
  -3   3 -11  662.01   26.55
   2  -7  11  479.34   23.61
  -2   7 -11  466.40   20.59
  -5  -2  11   -0.24    1.58
   1 -10   8   19.61    9.08
   1 -10   8   14.57    5.73
  -3  10   3 1298.79   45.30
   3 -10  -3 1238.72   43.75
   3 -10  -3 1327.81   47.44
  -2  -6  -6  546.25   21.19
  -2  -6  -6  526.73   19.52
   2   5 -12  318.86   13.81
  -2  -5  12  297.53   13.35
  -2  -5  12  331.62   20.87
  -8   1   6    5.98    3.41
  -8   1   6   11.52    5.21
   8  -1  -6   11.96    5.05
  -3  -5  -6    9.51    5.73
   4 -11   1   15.92    8.06
   4 -11   1   12.25    5.18
   2  -1 -12   23.59    8.02
   2  -1 -12   13.37    6.62
  -2   1  12   18.87    6.48
   8  -6  -4  293.25   18.97
   8  -6  -4  276.61   12.19
   8  -6  -4  269.17   14.81
   8  -7  -2   69.95   14.49
   8  -7  -2   92.99   17.43
   3 -11   5  760.68   29.76
   3 -11   5  765.78   28.55
  -1  -9  -2    1.54    1.50
  -1  -9  -2   -0.78    2.76
   4  -9  -5  539.48   22.10
   4  -9  -5  550.72   19.12
   6  -2 -10  325.56   14.22
   6  -2 -10  349.01   15.44
   6  -2 -10  354.63   17.87
  -6   2  10  343.61   15.04
   1 -10  -2    4.08    2.59
   1 -10  -2    3.03    3.43
   7  -9   2   27.74   10.54
  -6  -4   8  130.45   13.25
  -6  -4   8  121.46   10.76
   5  -6   9   76.06   14.71
  -5   6  -9   84.96   12.67
  -3  -8   8  156.20   14.46
  -3  -8   8  164.47   16.33
  -6  -5   2   23.50    7.72
  -6  -5   2   28.57   11.09
   4 -10  -3  231.08   14.81
  -4  10   3  182.09   12.64
   4 -10  -3  223.93   16.63
  -4  -7   8  298.36   19.17
  -4  -7   8  281.77   12.34
   6 -10   3   30.58   11.85
   6 -10   3   13.08    7.28
   0   0  12  160.86   15.98
   0   0 -12  178.50   12.11
  -8   4  -3    8.98    4.85
   8  -4   3   -2.71   12.64
   7  -4  -8  107.50   12.40
   7  -4  -8   91.68   12.70
   7  -4  -8   93.25   15.77
  -5   3  -9   13.76    6.12
   5  -3   9   -1.81   10.78
   1 -11   3  452.56   26.26
   1 -11   3  463.44   22.17
   8  -5   3   29.17   14.07
  -8   5  -3   47.02    8.99
   4 -10   7   78.30   13.80
  -2  -9   0   18.41    7.60
  -2  -9   0   11.61    5.32
   4 -11   4  138.87   14.16
   4 -11   4  122.20   16.30
   1 -11   4  270.63    8.49
   1 -11   4  296.67   17.94
   7  -9  -1  208.77   20.01
   7  -9  -1  141.90   14.07
  -3  -4  12  132.21   15.64
  -1 -10   6  288.04   16.90
  -1 -10   6  283.32   20.80
   1  10  -6  244.69   16.94
   1  -8  -6  290.62   12.99
  -1   8   6  285.05   12.55
   1  -8  -6  282.27   13.75
  -3  -7  -3   19.41    8.01
  -3  -7  -3   26.41   10.17
  -3   8 -10   87.04   13.34
   3  -8  10   97.70    9.32
   3  -1 -12  123.98   12.58
  -3   1  12  123.95   11.86
   3  -1 -12  105.04   11.55
   0  -6  12  433.09   26.73
   0  -6  12  437.03   18.87
   0   6 -12  427.85   18.96
  -7  -3   1  175.99   12.78
  -7  -3   1  184.06   12.57
  -6  -3  -3   53.99   11.69
  -6  -3  -3   60.21   10.68
   3 -11   0  598.08   24.23
   3 -11   0  596.71   21.83
   8  -4  -6    1.76    0.90
   8  -4  -6    1.34    4.05
   8  -4  -6    3.56    6.58
  -5  -6   0   29.71   11.56
  -5  -6   0   21.90    7.00
  -4  -1  12  516.36   22.72
   4   1 -12  546.71   19.87
  -4  -1  12  481.47   21.25
   4   1 -12  475.69   21.13
   5  -4 -10  269.71    5.30
   2   0  11  449.79   26.30
  -2   0 -11  554.99   21.08
   7   3  -6   13.77    5.22
  -7  -3   6   17.37    5.50
  -7  -3   6    2.38    2.49
  -5  -4  -4   59.46    9.40
  -5  -4  -4   64.74   13.91
  -8   0   0  217.60   14.69
  -6  -5   6   15.25    4.86
  -6  -5   6   16.86    6.83
   6   5  -6   19.34    5.88
  -1  -9   9   10.33    4.14
  -1  -9   9   16.73    7.13
   3  -6  -9  136.73   12.78
  -3  -2  -9   13.91    6.86
   3   2   9   11.24   13.21
   7  -8  -4   40.26    7.49
   1 -11   2    0.61    2.82
   1 -11   2    2.93    1.65
  -7   5  -6  228.26   17.21
   7  -5   6  190.44   22.67
   1   3  10   48.99   12.80
  -1  -3 -10   58.79   10.82
   1   3  10   50.44    8.61
  -4   2 -10  891.58   33.09
   4  -2  10  882.99   37.69
   0 -10  -1   19.14    6.47
   0 -10  -1   22.53    8.31
   4  -3 -11   76.23   11.31
   4  -3 -11  108.48   12.13
   0  -5  -9    2.08    1.13
   0   5   9    0.68    0.88
   0   5   9   -2.27    4.57
  -1   1  12   -0.99    1.85
   1  -1 -12    3.08    5.34
   1  -1 -12    1.91    1.93
   0   6   8    4.34    1.27
   0   6   8   -3.52    6.38
   0  -6  -8    2.97    4.23
   3  -7  -8  243.08   16.38
   6 -10  -1  844.74   30.74
   6 -10  -1  880.34   33.90
   2  -9  -5  230.96   16.14
  -2   9   5  207.97   13.34
   2  -9  -5  220.54   14.63
   3  -6  11   78.42   13.56
  -3   6 -11   79.06   12.05
  -4  -2  12   63.07   10.55
   4   2 -12   66.28    9.17
   7  -4   6   31.73   11.74
  -7   4  -6   87.16   14.32
  -1   3  11    9.78    4.03
   1  -3 -11   12.46    5.68
  -1   3  11    2.49    2.37
   1 -11   5  458.57   22.26
   1 -11   5  477.77   22.54
   3 -10   8  243.65   20.71
   3 -10   8  204.85   18.50
   1  -1  12  155.36   16.18
  -1   1 -12  206.77   17.12
  -4  -6  -3  183.45   15.09
  -4  -6  -3  197.60   17.07
  -2  10   3    8.35    4.00
   2 -10  -3   15.94    5.17
   2 -10  -3   18.27    7.25
   1   6 -12   93.17   15.37
  -1  -6  12   94.52   13.34
  -1  -6  12   88.40   13.35
   8  -3   3  383.28   36.00
  -8   3  -3  431.46   20.51
  -3  -6  11   31.69    6.34
  -8   7  -2  347.26   17.82
   8  -7   2  368.04   26.78
   4 -11   0  259.74   19.35
   4 -11   0  255.56   16.89
  -1 -10   1    9.66    4.98
  -1 -10   1    9.60    5.09
   4   0 -12    4.00    1.48
   4   0 -12   -0.66    1.62
  -4   0  12    0.43    0.66
  -4   0  12    1.14    1.43
   5 -10   6   66.59   13.18
   7  -1  -9  478.75   21.05
  -7   1   9  501.12    6.18
   7  -1  -9  468.52   21.30
   7  -1  -9  474.46   20.66
  -3  -7  10  578.77   27.40
   7   0   4  217.32   29.38
  -7   0  -4  280.75   14.47
  -8   6  -3  114.61   11.69
   8  -6   3   93.99   19.62
  -5   2  11  239.67   15.30
   5  -2 -11  225.78   14.63
  -5   2  11  214.32   14.80
   5  -2 -11  263.81    5.90
  -4  -3  -7   27.27    9.11
   4   3   7   22.51   12.93
   2   2  10  324.46   23.98
  -2  -2 -10  376.93   17.30
   3  -2  11   39.51   13.36
  -3   2 -11   71.15   12.47
  -8  -1   3  479.69   26.76
  -8  -1   3  538.46   20.17
  -6  -2  10   10.80    5.10
   6   2 -10    5.31    2.34
  -7  -1  -3  578.97   21.79
   7  -9   3   47.19   12.47
  -7   9  -3   66.81   12.05
   8  -7  -3  346.72   20.58
   8  -7  -3  404.21   26.25
   4  -7  -8  458.59   21.02
  -2  -8  -3  528.91   19.48
  -2  -8  -3  524.24   20.13
  -1  -7  -6   46.86   11.21
  -1  -7  -6   32.48    8.02
   4  -6  -9  678.55   24.58
   2 -11   6  173.85   15.70
   2 -11   6  154.38   17.36
  -6   9   4  583.78   24.22
   6  -9  -4  709.75   27.94
   6  -9  -4  604.58   21.62
   1  -6  12  267.02   11.15
   1  -6  12  255.77   16.17
  -1   6 -12  265.81    5.43
   2 -11   0   53.28   11.51
   2 -11   0   54.75   10.37
  -7   6  -6   58.97   10.83
   7  -6   6   64.01   22.69
   0 -10   8   29.14    9.58
   0 -10   8   28.10    8.38
   0 -10   8   37.51    7.90
  -4  -4  -6   70.28   11.18
   4   4   6   55.86   21.22
   7  -2  -9  365.30   17.17
  -7   2   9  411.27   18.06
   7  -2  -9  402.47   17.96
   7  -2  -9  411.29   18.03
  -6   5  -8   36.21    8.76
   6  -5   8    2.97    8.18
  -8  -1   4   94.99   13.74
  -8  -1   4   97.07   15.67
   6  -6  -8    8.63    6.83
   6  -7  -7   14.28    8.51
  -2  -9   8   85.31   12.04
  -2  -9   8   70.36   11.92
  -2  -9   8   83.02   13.96
  -3  -8  -1   31.90    7.23
  -3  -8  -1   27.47    8.82
  -2   6   9   92.89   12.77
  -2   6   9   65.84   11.38
   2  -6  -9   90.35   15.10
   6 -10   4  119.66   16.53
   6 -10   4  142.75   15.86
  -2  -7  11  155.88   20.93
  -2  -7  11  127.41   11.22
   7   0  -9   16.11    4.99
  -7   0   9   15.03    5.06
   7   0  -9   15.09    5.19
  -6  -5   1    6.62    3.35
  -6  -5   1    6.57    4.52
   4  -7  10   39.11   11.86
  -4   7 -10   36.73    7.88
  -4  -6  10   50.80   14.95
  -7   9   2   17.94   10.12
   7  -9  -2   16.19   10.05
   7  -9  -2    6.60    5.56
   3  -5 -10  119.35   11.91
   4 -11   5  406.00   19.47
   4 -11   5  409.21   21.27
   1  -9  10   78.11   12.10
   1  -9  10   72.44   12.18
   1  -9  10   56.69   12.21
  -8  -1   2    0.73    1.80
  -8  -1   2    0.57    1.98
  -4  -7  -1  176.18   13.32
  -4  -7  -1  182.40   16.85
   5   0   8   15.32   21.39
  -5   0  -8   34.40    9.46
  -6   9  -6   -0.62    3.18
   6  -9   6   -2.71    5.19
   5  -9  -5   11.23    7.91
   5  -9  -5    8.36    3.31
  -5   9   5    5.33    4.79
  -6   8  -7  132.75   12.88
   6  -8   7  166.15   15.30
  -6   4  -8  363.83   20.26
   6  -4   8  343.72   25.74
  -5  -6   8   15.34    5.47
  -5  -6   8   22.59    7.76
  -5  -3  11  146.26   15.22
   3 -11   6  100.18   13.39
   3 -11   6   83.80   14.98
   6  -1   7   24.82   25.44
  -6   1  -7   24.14    8.60
   7   2  -8   12.56    4.79
  -7  -2   8    2.01    1.41
   2  -4  12  474.46   27.74
  -2   4 -12  441.56   19.87
   0   4  10   25.33    7.29
   0   4  10   36.43   12.81
   0  -4 -10   33.23    7.26
  -3  -6  -5  413.51   18.72
  -3  -6  -5  432.39   20.88
   5  -7   9   16.84    9.82
  -5   7  -9    3.23    2.51
  -4  -8   4    1.00    1.68
  -4  -8   4    3.92    3.18
   5 -11   2    2.92    2.97
   5 -11   2   -2.45    5.81
   4   2   8   14.56   14.84
  -4  -2  -8   -0.31    2.47
   5 -10  -3  597.97   23.26
   5 -10  -3  590.90   21.07
  -5  10   3  589.51   23.22
   2  -7  -8    6.93    4.06
  -2   7   8    4.70    2.01
   1  -8  11  121.30   16.35
  -1   8 -11  101.43   12.25
   1  -8  11  111.34   10.81
   6  -3 -10   91.37   13.41
   6  -3 -10   87.95   12.53
  -6   3  10   87.94   12.10
   1 -11   1   18.30    6.24
   1 -11   1   13.12    7.41
  -5   2  -9   28.10    9.13
   5  -2   9    8.14   11.74
  -4  -5  11   29.92    9.37
  -7   1  -5   64.38   13.21
   7  -1   5   89.43   26.26
   8  -2  -7    1.13    1.08
   8  -2  -7   -0.57    3.28
  -8   2   7    3.79    1.39
   0  -8  11  250.70   20.16
   0  -8  11  209.84   13.36
   0  -7  -7  243.70   16.80
   0   7   7  182.14   11.71
   0  -7  -7  245.76   16.59
   7  -3   6  678.40   36.98
  -7   3  -6  674.05   25.09
   7  -8   5   11.47    8.43
  -7   8  -5   16.39    7.86
  -4  -8   5   62.62   10.62
   4   8  -5   53.80    9.56
  -4  -8   5   75.27   15.49
  -2  -8  10   18.84    5.62
  -2  -8  10   21.59   10.06
  -1 -10   7  221.28   15.16
  -1 -10   7  219.51   18.38
  -2   3 -12   41.81   10.29
   2  -3  12   28.06   10.73
   6  -6   8   65.67   17.47
  -6   6  -8   52.61   10.10
   5 -11   1   49.67   10.58
   5 -11   1   47.48   13.28
  -3   8   7  244.68   15.49
   3  -8  -7  259.18   17.94
   7  -6  -7   53.60   10.37
   7  -6  -7   74.42   13.91
   7  -6  -7   65.35    9.10
   5 -11   3   45.71   12.15
   5 -11   3   43.75   13.68
  -8   1  -2  604.31   22.69
   8  -1   2  603.99   47.38
  -4  -3  12   26.92    8.90
  -4  -8   3   10.94    5.18
  -4  -8   3   16.69    6.71
  -3  -9   4    5.75    4.24
  -3  -9   4    0.49    1.80
  -2  -7  -5   33.30    7.21
  -2  -7  -5   34.11    9.66
  -2   5  10  500.77    6.46
  -2   5  10  544.10   18.77
   2  -5 -10  542.35   20.43
   8  -6  -5   -1.66    5.16
   8  -6  -5    4.01    1.48
   8  -6  -5    5.51    6.10
   1 -11   6   38.37   11.41
   1 -11   6   30.06   10.17
   2  -9  10  105.99   12.83
  -2   9 -10  101.54   12.54
   2  -5  12  386.47   19.84
  -2   5 -12  441.54   20.61
  -7  -3   0  556.62   23.48
  -7  -3   0  623.21   23.48
  -8  -1   5   31.79    6.72
   8   1  -5   24.07    7.89
  -8  -1   5   30.62    9.27
   4  -8  -7   16.28    7.34
   0  -9  10  268.01    5.80
   0  -9  10  282.98   14.48
   0  -9  10  280.90   14.44
   4  -5 -10  136.65   13.04
  -6  -5   7   28.28    9.68
   6   5  -7   22.79    8.00
  -6  -5   7   28.91    9.19
   7  -7  -6   52.36    9.78
   7  -7  -6   55.66    9.33
   7  -7  -6   54.66   12.41
   8  -3  -7  272.26   14.91
   8  -3  -7  283.81   12.54
   4  -1 -12   62.42    9.43
   4  -1 -12   59.30    9.63
  -4   1  12   58.53    9.83
  -4   1  12   46.46    8.80
   8  -1  -7  535.73   19.01
   8  -1  -7  596.15   23.92
  -8   1   7  573.37   23.50
   3   9  -5   22.94    7.54
  -3  -9   5   28.19    9.99
  -3  -9   5   35.26    7.68
   8  -5  -6   35.46    6.32
   8  -5  -6   48.00   14.49
   8  -5  -6   33.14   10.24
  -7  -2  -2  619.08   31.30
  -7  -2  -2  617.98   24.13
   8  -8   0  473.21   25.36
   3 -11  -1   76.97   13.05
   3 -11  -1   74.80   10.93
   6  -5  -9   41.84   10.36
   7   3  -7   16.55    5.03
  -7  -3   7   19.15    6.60
  -7  -3   7   19.77    6.86
  -3  -9   3  227.86   17.51
  -3  -9   3  233.79   15.55
   6  -8  -6   33.67    5.70
   6  -8  -6   38.67   10.83
  -6  10   2   -1.38    3.93
   6 -10  -2    2.85    1.69
   6 -10  -2    7.05    7.15
  -8  -1   1  138.34   16.43
  -8  -1   1  129.02   13.01
  -1  -3  13    3.25    3.41
   1   3 -13    7.74    3.33
  -1  -3  13    5.86    2.76
   8   0   1  502.17   36.37
  -8   0  -1  467.70   21.71
  -8   2  -3  107.55   11.86
   8  -2   3  105.80   34.43
   7  -3  -9   44.69    9.64
   7  -3  -9   45.60    8.33
   0  -9  -4   45.83    9.97
   0  -9  -4   52.48   10.77
   8  -8  -1  179.24   16.29
   8  -8  -1  191.77   19.00
   6  -3   8  679.93   35.82
  -6   3  -8  819.60   30.24
   4 -11  -1   13.89    8.44
   4 -11  -1   11.24    4.90
  -4  -5  -5  815.46   30.46
  -4  -5  -5  799.55   29.16
   8  -7   3  230.02   23.43
  -8   7  -3  263.34   13.07
  -3  -5  12   26.41   10.25
   8  -8   1   55.89   16.57
  -8   8  -1   50.89   11.47
  -6  -4  -2   31.23    8.82
  -6  -4  -2   22.62    7.90
  -1  -2  13  799.19   31.77
  -1  -2  13  761.72   27.09
   1   2 -13  766.79   27.52
  -2  -9  -1  607.62   22.26
  -2  -9  -1  610.96   22.50
  -5  -7   4   20.66    6.86
  -5  -7   4   26.99    9.13
  -7  -1   9    6.56    3.36
   7   1  -9    2.91    1.14
   7   1  -9    3.65    2.57
  -2  -6  12   93.51   13.90
  -2  -6  12   86.77   12.04
   4   8  -6  564.07   20.44
  -4  -8   6  587.84   23.38
  -4  -8   6  598.66   22.19
  -7   7  -6  319.90   15.98
   7  -7   6  290.35   23.32
   7  -5  -8   23.99    8.64
   7  -5  -8   21.37    8.19
   7  -5  -8   17.41    5.94
   2  -2 -12  239.82   15.81
   2  -2 -12  213.62   16.93
  -2   2  12  245.62   16.01
  -3   7 -11  687.83   24.86
   3  -7  11  664.14   27.59
   2   2 -13  106.73   10.44
  -2  -2  13   92.82   14.21
  -2  -2  13  108.76   11.06
   5 -11   0  924.69   33.59
   5 -11   0  907.64   34.90
   4  -9   9   -0.56    4.17
  -4   9  -9   -2.58    2.24
  -5  -5  -3   10.99    5.60
  -5  -5  -3    2.59    2.53
  -3  -8   9   82.67   12.14
  -3  -8   9   74.39   10.41
  -3  -8   9   79.50   11.95
   8  -5   4  302.99   30.64
  -8   5  -4  336.66   16.45
  -7   9  -4   32.08    9.68
   7  -9   4    1.97    6.20
   5 -11   4  139.92   18.72
   5 -11   4  164.24   17.31
  -1 -10   0  174.46   12.56
  -1 -10   0  174.78   14.42
   3  -2 -12  305.83   13.70
   3  -2 -12  241.91   18.19
   3   1  10    5.36    8.44
  -3  -1 -10   14.29    7.18
  -4  -7   9  651.65   25.16
   0 -11   4  131.40   13.63
   0 -11   4  141.54   13.59
   5  -7  -8    6.94    5.15
   0  -1 -12   24.04    7.74
   0   1  12   11.57    6.87
   0  -1 -12   26.44   11.99
  -5  -7   5  435.78   22.33
   5   7  -5  411.35   18.22
  -5  -7   5  431.64   19.08
  -4  -8   2  203.63   13.96
  -4  -8   2  191.26   13.71
  -2   8 -11   79.69   14.03
   2  -8  11   91.63   20.18
   8  -7  -4  104.91   15.47
   8  -7  -4   94.91   13.46
   8  -7  -4   92.37   17.31
  -2  -3  13  156.46   13.88
  -2  -3  13  159.40   16.49
   2   3 -13  168.60   10.83
  -4   1 -10   23.38   10.25
   4  -1  10   -0.63    7.24
  -5  -6  -1  131.55   14.96
  -5  -6  -1   93.56   13.39
  -6  -4   9  164.84   10.73
   0 -11   3  254.91   17.85
   0 -11   3  267.50   14.16
   8  -4   4   16.20   20.97
  -8   4  -4   16.05    6.44
   1   2  11   -2.09    5.49
  -1  -2 -11    3.53    2.45
   1 -10   9  169.77   18.69
   1 -10   9  159.56   16.16
  -5   9  -8  521.80   22.80
   5  -9   8  497.56   13.44
  -2   2 -12   16.21    6.60
   2  -2  12   13.46   10.04
  -5  -7   3  306.07   17.26
  -5  -7   3  309.67   15.58
  -2   8   7   10.18    4.12
   2  -8  -7   15.58    7.18
   5  -6  -9   -1.32    2.64
  -3  -9   6   73.14   11.26
  -3  -9   6   89.64   12.90
   3   9  -6   84.22   12.55
   2 -10   9    2.35    4.49
   2 -10   9    4.08    2.97
  -1  -4  13    4.38    2.23
  -1  -4  13    5.95    2.88
   1   4 -13    6.80    3.23
  -3   1 -11   11.83    6.32
   3  -1  11    5.57    7.35
  -1   9   5  176.74   11.69
   1  -9  -5  195.10   13.44
   1  -9  -5  201.26   13.85
   2 -11   7   -0.22    3.02
   2 -11   7    8.50    8.05
  -1   0 -12    2.39    1.79
   1   0  12    2.91    6.06
   3 -10  -4  639.29   24.83
   3 -10  -4  650.90   22.72
   7  -9  -3    1.84    5.76
   7  -9  -3    0.46    2.80
  -7   9   3   -0.33    4.03
  -1  -8  11  224.48   14.76
  -1  -8  11  227.15   18.80
  -1  -8  11  209.87   14.34
   1 -10  -3  137.36   14.22
   1 -10  -3  143.65   14.22
   6 -10   5  108.91   14.59
  -3  -9   2  361.87   21.84
  -3  -9   2  341.06   16.09
   0   7 -12   36.16    7.13
   0  -7  12   36.40    7.29
   0  -7  12   40.25   14.08
   3  -4 -11  287.10   15.16
  -3   4  11  293.05   12.47
  -5  -5  10  278.79   13.29
   5  -3 -11  585.64   21.28
   5  -3 -11  554.30   19.99
  -4  10   4   24.23    7.99
   4 -10  -4   32.17    9.61
   4 -10  -4   35.71    7.59
   4 -11   6  138.57   17.20
   4 -11   6  170.86   14.22
   0 -11   5    4.00    3.61
   0 -11   5   -0.65    2.39
   2 -11  -1   32.71    9.32
   2 -11  -1   38.55   10.43
   6  -7   8    3.10    7.19
  -6   7  -8   -0.55    2.04
   0   3 -13   40.00    7.86
   0  -3  13   37.11   11.40
  -6  -5   0  222.34   14.73
  -6  -5   0  230.24   19.48
   2   1 -13   43.05    8.02
  -2  -1  13   26.54   10.58
   2   1 -13   39.23    9.47
  -2  -1  13   46.21   12.24
   4   1   9    5.17    9.61
  -4  -1  -9   39.93   11.95
   8  -8  -2  149.00   18.07
   8  -8  -2  155.02   18.85
  -1  -9  -3    0.84    2.07
  -1  -9  -3    2.29    1.81
  -4  10  -8   11.05    3.71
   4 -10   8    1.43    2.47
  -7  -4   4    1.95    2.04
  -7  -4   4    0.59    1.19
   8  -4  -7  155.97   22.05
   8  -4  -7  152.27   13.52
   8  -4  -7  150.42   16.08
   1 -11   0   53.69   15.17
   1 -11   0   59.24   10.78
  -6  -3  10  158.05   15.09
   7  -8  -5  103.62   11.88
   7  -8  -5  100.58    8.53
   7  -8  -5   80.03    9.22
  -2   6 -12  201.28   11.19
   2  -6  12  218.34   15.06
  -8   0   7    6.44    4.47
  -8   0   7   10.01    4.84
   8   0  -7    5.04    2.67
   8  -6   4   10.03   13.26
  -8   6  -4   31.37    7.22
  -6  -2  -5  219.09   13.86
   6   2   5  214.66   31.95
  -1   6   9    4.66    4.97
  -1   6   9    0.63    0.82
   1  -6  -9   -0.53    2.53
   8   1  -6  103.72   10.34
  -8  -1   6  118.24   12.63
  -8  -1   6   92.05   13.20
   0 -10  -2   26.67    5.21
   0 -10  -2   26.07    7.18
   0   3  11  157.47   15.21
   0   3  11  158.61    9.15
   0  -3 -11  157.24    9.61
   8  -8   2  659.25   34.13
  -8   8  -2  598.76   27.72
  -7  -4   3 1214.85   57.08
  -7  -4   3 1227.86   43.34
   0  -4  13  294.13   22.74
   0  -4  13  286.86   19.16
   0   4 -13  305.57   20.70
   1   1 -13    1.53    1.84
  -1  -1  13   -1.04    2.12
   7  -2   6   23.89   16.78
  -7   2  -6   47.15   11.07
  -6  -1  -6    2.25    2.47
   6   1   6   10.37   22.17
   5  -8  -7  495.74   22.45
  -5  -7   6   74.37    6.12
   5   7  -6   62.32    3.03
  -5  -7   6   74.30   10.87
   2  -4 -11    8.88    3.47
  -2   4  11    0.65    1.32
   0 -11   2   40.75    8.55
   0 -11   2   36.76    6.78
  -2 -10   4  154.40   11.56
  -2 -10   4  158.15    9.33
   1  -7  12   46.89    8.75
  -1   7 -12   54.87    9.61
   1  -7  12   43.36    7.64
  -1  -8  -5   -0.28    1.72
  -1  -8  -5    1.22    1.81
   5 -10   7   88.54   10.37
  -5  10  -7   79.99   15.38
   7   4  -5   53.66    7.02
  -7  -4   5   67.53    5.32
  -7  -4   5   70.00    3.58
   3 -11   7  776.66   38.24
   3 -11   7  777.71   35.40
   9  -4  -2  108.07   21.55
  -9   4   2   92.01   13.71
   6   0 -11    3.54    1.68
   6   0 -11    1.45    1.07
   6   0 -11    1.47    1.18
  -6   0  11   -0.44    1.29
  -2  -1 -11    3.73    2.50
   2   1  11    0.51    6.36
   0   2 -13    3.08    2.91
   0  -2  13    3.36    2.64
   0   8   6  209.16   10.87
   0  -8  -6  190.19   11.93
   0  -8  -6  222.62   14.13
   1 -11   7  345.35   24.77
   1 -11   7  351.92   27.13
   1  -2 -12  550.30   23.21
  -1   2  12  530.01   23.24
   1  -2 -12  476.70   28.18
  -4  -4  12  486.58   23.71
  -2  -4  13  147.99    9.86
  -2  -4  13  143.05    7.49
   2   4 -13  125.36   10.07
  -8  -1   0    5.35    3.24
  -8  -1   0    5.59    2.75
  -5  -7   2    0.73    2.04
  -5  -7   2    1.31    3.06
  -8   3  -4   13.52    3.83
   8  -3   4    3.30   14.42
  -1   5  10  538.72   22.17
  -1   5  10  604.92   28.07
   1  -5 -10  590.55   25.34
  -2 -10   5  224.24   14.50
  -2 -10   5  236.44   22.31
  -1   7   8    0.59    0.70
   1  -7  -8   -1.17    2.78
  -1   7   8    1.06    3.86
   9  -4  -1  129.10   26.55
  -9   4   1   90.53    8.68
   9  -3  -2   99.15   25.03
  -9   3   2  120.28   11.01
   4  -8  10   -2.69    5.03
  -4   8 -10    2.65    2.41
   5  -8   9   -3.31    5.72
  -5   8  -9    6.46    5.22
  -2 -10   3   27.52    7.38
  -2 -10   3   25.10    6.15
  -5  -4  11   41.19    9.32
   3  -9  -6   85.96    7.09
  -3   9   6   72.35    3.07
   3  -9  -6   83.19   17.37
  -3   9 -10  667.87   30.61
   3  -9  10  609.79   32.46
  -1 -10   8   49.15    6.43
  -1 -10   8   54.49    4.50
  -1 -10   8   54.63    7.39
  -4  -8   7  134.96    5.85
   4   8  -7  129.98   11.11
  -4  -8   7  143.50    7.68
  -5  -3  -6    1.92    2.01
   5   3   6    0.58   11.81
   4  -9  -6 1008.39   44.21
   4  -9  -6  956.27   38.78
  -1  -7  12   65.88    1.79
  -1  -7  12   85.35   12.99
  -2  -9   9   16.72    4.93
  -2  -9   9   12.92    2.69
  -2  -9   9   11.13    1.37
   6  -1 -11  198.85   10.23
   6  -1 -11  191.32   10.85
   6  -1 -11  199.62   10.48
  -6   1  11  159.35    8.31
  -3  -2  13  589.40   24.82
  -3  -2  13  493.71   20.59
   3   2 -13  552.70   22.95
  -1  -9  10  179.92   16.02
  -1  -9  10  150.12    7.89
  -1  -9  10  169.11    9.67
   4  -4 -11  118.78   12.49
  -5   1  -9  802.12   33.86
   5  -1   9  758.19   45.38
  -9   3   3  223.93   14.74
   9  -3  -3  247.02   29.47
   5 -11  -1   27.55    5.86
   5 -11  -1   26.81   10.51
   5  -5 -10   17.91    5.77
  -5  -2  -7  209.20   13.14
   5   2   7  253.09   33.53
   9  -4  -3  143.74   25.57
  -9   4   3  138.38   12.70
   6  -4 -10  107.76    9.75
   0 -10   9  163.24   10.71
   0 -10   9  154.82    8.54
   0 -10   9  139.10   10.44
  -5  -6   9  321.74   22.34
   4  -2 -12    0.80    2.14
  -4   2  12   -0.10    0.69
   4  -2 -12    0.84    1.32
  -6  -3  -4   26.94    7.25
   5 -11   5  174.30   12.30
   5 -11   5  191.27   15.79
  -7  -4   2   54.38    9.50
  -7  -4   2   51.19   11.96
   6   1 -11    2.30    1.06
   6   1 -11    2.88    1.03
  -6  -1  11   -0.35    1.41
   7 -10   1   52.62    9.61
   7 -10   1   42.03   13.21
   6   5  -8    4.75    1.77
  -6  -5   8    3.91    1.31
  -6  -5   8    0.13    2.76
   0 -11   6   48.48    9.04
   0 -11   6   44.30   15.18
  -3  -7  -4   49.01    5.02
  -3  -7  -4   55.28    9.06
  -6   2  -8   18.21    4.37
   6  -2   8    4.88   13.80
   9  -3  -1   23.27   18.78
  -9   3   1   25.05    7.39
   5   1 -12    2.94    1.48
   5   1 -12    2.99    0.90
  -5  -1  12    0.43    1.42
   3   1 -13    3.57    3.25
  -3  -1  13   13.70    2.75
   6  -9  -5  481.20   19.96
  -6   9   5  447.66   20.83
   6  -9  -5  492.65   23.05
   2   5   8  613.50   38.91
  -2  -5  -8  632.38   27.07
  -7  -3  -1   33.30    7.51
  -7  -3  -1   40.43   10.22
  -9   5   1   12.42    5.49
   9  -5  -1   27.08   22.76
  -3  -8  -2  700.90   29.89
  -3  -8  -2  637.77   29.51
   7  -4  -9  270.67   17.92
   7  -4  -9  299.80   21.12
   7  -4  -9  264.18   20.34
  -4  -8   1  439.40   21.17
  -4  -8   1  479.48   21.42
   3 -10   9  169.49   12.81
  -3  -9   7   31.14    6.22
   3   9  -7   38.92    6.93
  -3  -9   7   36.03    7.08
   9  -5  -2    3.04    9.66
  -9   5   2    0.60    1.32
  -5   0  12    6.21    2.35
  -5   0  12    0.35    1.62
   5   0 -12    5.93    1.94
   5   0 -12    8.34    2.27
   2 -10  -4  391.87   27.12
   2 -10  -4  386.30   25.78
  -2  10   4  368.35   24.68
  -1  -5  13   19.79    6.87
  -1  -5  13   19.73    1.84
   1   5 -13   19.96    5.30
  -4  -7  -2  321.70   22.54
  -4  -7  -2  318.69   22.20
   7 -10   0   39.51   10.99
   7 -10   0   46.00   10.62
   2   4   9   46.77   18.63
  -2  -4  -9   48.11   12.94
   6 -10  -3  382.61   28.41
  -6  10   3  433.83   23.79
   6 -10  -3  395.23   27.11
   0  -5  13   11.09    4.88
   0  -5  13   14.12    1.92
   0   5 -13   16.35    4.06
   4  -5  11  132.74   19.07
  -4   5 -11  164.70   12.44
  -7  -3   8   85.24    9.89
  -7  -3   8   96.75   10.59
   7   3  -8  102.87    8.20
   7 -10   2   60.65   12.68
   7 -10   2   51.81    7.25
   5 -10  -4   34.42   10.38
   5 -10  -4   34.95    6.93
  -5  10   4    6.46    4.49
  -4   4 -11    5.42    3.70
   4  -4  11    0.84    7.39
   6  -9   7    5.67    8.09
  -6   9  -7    1.35    2.40
   3 -11  -2  504.61   22.95
   3 -11  -2  517.90   22.87
  -7  -2   9  320.65   22.69
   7   2  -9  290.79   19.29
  -8  -2   3   19.71    5.24
  -8  -2   3   13.52    3.63
   3   3 -13   10.40    2.51
  -3  -3  13   12.26    2.13
  -3  -3  13   17.99    5.45
   9  -4   0   89.01   29.42
  -9   4   0   83.47   11.98
  -8  -2   4  245.57   17.52
  -8  -2   4  262.67   18.83
  -2   0  13   -0.90    1.60
   2   0 -13    3.40    1.37
   2   0 -13   -1.26    3.21
   8  -8  -3    3.37    6.03
   8  -8  -3    0.66    0.36
   8  -8  -3    3.38    3.86
  -3  -9   1    0.57    1.94
  -3  -9   1    1.15    2.33
   7   1   4   -4.39   15.09
  -7  -1  -4    3.73    3.96
  -7  -4   6  131.86   11.49
  -7  -4   6  118.71   11.29
   7   4  -6  108.57    9.53
  -2 -10   6   -0.51    2.67
   2  10  -6    2.56    3.07
  -2 -10   6    1.68    2.16
  -6   0  -7   76.84   12.07
   6   0   7   73.16   25.96
   4 -11  -2   15.53    8.53
  -4  11   2   -0.89    2.39
   4 -11  -2    7.40    3.07
   5  -5  10  822.24   40.31
  -5   5 -10  783.67   37.23
   8  -6  -6  427.89   30.50
   8  -6  -6  451.04   22.70
   8  -6  -6  427.43   28.27
   8  -1   3   27.36   15.07
  -8   1  -3   29.29   10.30
  -7   5  -7  409.56   31.96
   7  -5   7  349.68   33.31
  -8   7  -4  359.03   25.28
   8  -7   4  351.79   32.78
   3   4   8   69.24   20.28
  -3  -4  -8  103.45   10.33
  -4  -6  -4  439.81   22.67
  -4  -6  -4  440.78   20.63
  -7   8  -6   46.84    9.42
   7  -8   6   76.75   16.09
  -2   1 -12  803.73   35.38
   2  -1  12  885.06   41.40
   8  -2  -8  118.63   10.72
   8  -2  -8  134.14   13.32
  -8   2   8  125.92   12.82
   9  -2  -2   20.90   16.59
  -9   2   2    1.92    1.91
   8   0   2    6.22   14.35
  -8   0  -2    0.90    1.37
  -5  -4  -5   58.73    4.87
  -9   5   0  411.37   29.18
   9  -5   0  438.69   30.65
  -9   2   3   24.27    6.81
   9  -2  -3   14.52   13.15
  -2 -10   2  376.63   27.06
  -2 -10   2  381.16   26.45
   0 -11   1  128.26   11.03
   0 -11   1  114.23   10.46
   7   0   5  109.55   25.66
  -7   0  -5  124.59   16.98
  -9   3   4   56.77   12.00
   9  -3  -4   57.49   22.21
  -5   4 -10  144.55   14.67
   5  -4  10  134.14   25.90
  -8   8  -3  129.01   12.94
   8  -8   3  149.62   20.60
   1   5   9   12.55    9.15
  -1  -5  -9   16.75    3.93
  -6  -6   4    2.91    1.75
  -6  -6   4    2.05    2.24
  -9   5   3   75.26   10.99
   9  -5  -3   73.19   22.04
   5   7  -7   94.47    8.12
  -5  -7   7   85.13    9.09
  -5  -7   7   98.20   10.97
  -3  -7  11    0.76    3.32
  -7   9  -5 1511.39   25.35
   7  -9   5 1486.02   64.27
   5   2 -12   97.03    7.49
   5   2 -12   99.79    7.75
  -5  -2  12   85.69    9.46
   8  -1  -8  148.65   10.31
   8  -1  -8  144.35    8.28
  -8   1   8  132.79   11.84
  -2  -8  -4  909.96   38.12
  -2  -8  -4  916.44   42.29
   6 -11   2   69.80   11.64
   6 -11   2   51.68   11.50
  -2  -6  -7  158.92   10.83
   0  -1  13  195.44   12.87
   0   1 -13  200.45   13.24
  -9   4   4  271.61   22.07
   9  -4  -4  278.02   30.13
  -7   4  -7   23.87    6.30
   7  -4   7    9.31   10.94
  -3  -5  -7   12.59    3.43
   3   5   7   12.24   13.93
   7  -1 -10   89.38    7.50
  -7   1  10   95.64    9.05
   7  -1 -10   88.64    7.16
   7  -1 -10  109.94    9.45
   6 -11   1    5.34    5.93
   6 -11   1    0.77    2.63
  -6   2  11   11.04    1.89
   6  -2 -11    1.92    1.44
   6  -2 -11    6.81    1.56
  -6  -6   5    1.49    2.02
   6   6  -5    9.99    2.11
  -6  -6   5    5.55    1.96
  -7   6  -7   15.46    6.20
   7  -6   7    4.34    9.94
  -8  -2   2  391.37   26.76
  -8  -2   2  378.14   26.41
   1   6   8   91.29   16.77
  -1  -6  -8  115.97   15.70
  -9   3   0  222.12   13.97
   9  -3   0  191.08   35.60
  -1 -10  -1  113.09   10.68
  -1 -10  -1   95.92    9.32
   8  -7  -5    4.53    5.23
   8  -7  -5    1.55    0.95
   8  -7  -5   -1.51    3.07
  -5  -1  -8   30.83    7.98
   5   1   8   24.33   17.42
  -8  -2   5  124.74   11.76
  -8  -2   5  115.52   11.00
  -2   9   6  547.97   22.51
   2  -9  -6  609.07   25.03
   2  -9  -6  610.71   26.68
  -5   1  12  483.91   19.88
   5  -1 -12  525.56   22.81
  -5   1  12  436.83   19.43
   5  -1 -12  482.15   20.40
  -1   4 -13   30.18    9.20
   1  -4  13   29.60    7.60
   8  -5  -7  117.22   13.90
   8  -5  -7  134.30   15.25
   8  -5  -7  107.96    8.72
  -5   6 -10   13.51    5.77
   5  -6  10   12.72   10.46
  -1   0  13   -1.29    2.14
   1   0 -13    0.46    1.55
   1   0 -13    2.66    3.91
   4  -6  11  451.10   25.13
  -4   6 -11  449.68   19.86
   3   0 -13   20.32    5.92
  -3   0  13   19.91    3.85
  -3   0  13   18.85    3.72
   3   0 -13   17.42    5.52
  -6  -6   3   94.31   11.65
  -6  -6   3   85.01    8.91
   7 -10  -1   38.32   12.09
   7 -10  -1   32.77    7.61
  -1   4  11 1363.82   56.63
   1  -4 -11 1177.70   49.71
  -5   9   6    1.46    2.28
   5  -9  -6    1.79    0.66
   5  -9  -6    1.76    1.66
  -8  -1   7   99.12    9.23
   8   1  -7   84.08    7.58
  -8  -1   7   91.38   11.30
   1  -8  -7  217.11   13.13
  -1   8   7  186.73    9.67
   3  -8  11    0.23    2.95
  -3   8 -11    5.46    4.12
  -5  -7   1  208.56   12.42
  -5  -7   1  222.51   15.97
   1  -3  13  162.71   12.67
  -1   3 -13  159.66   16.16
   7   0 -10    0.14    0.74
   7   0 -10    2.69    2.15
  -7   0  10    1.76    1.02
   9  -2  -1   97.89   22.65
  -9   2   1  139.60    9.21
  -6   8  -8   95.86   10.19
   6  -8   8   80.37   13.09
  -3  -3  -9  411.37   28.01
   3   3   9  455.69   37.07
   8  -3  -8  607.23   27.31
   8  -3  -8  549.01   22.63
   2  -7  12    3.53    4.36
  -2   7 -12    5.96    2.88
  -4  -6  11  499.75   24.79
  -4   3 -11  206.57   13.14
   4  -3  11  177.10   18.11
  -7  -2  -3    0.56    2.41
   7   2   3   30.64   23.06
   7 -10   3  408.22   29.39
   7 -10   3  501.16   31.96
  -9   2   4  233.67   19.49
   9  -2  -4  257.82   53.46
  -6  -2  11    1.13    1.48
   7  -9  -4  226.55   12.25
   7  -9  -4  223.43   15.16
  -7   9   4  218.60   15.46
  -7  -4   1    2.87    3.63
  -7  -4   1    0.08    1.01
   1 -11  -1   66.70   14.91
   1 -11  -1   63.59    4.14
   9  -6  -1  817.28   42.41
  -9   6   1  811.47   35.41
  -2  -9  -2  235.49   16.65
  -2  -9  -2  238.59   19.52
  -6  10  -6  746.26   36.23
   6 -10   6  755.45   34.12
   6 -11   3  885.43   42.39
   6 -11   3  777.55   34.08
   4 -11   7   15.11    4.79
   4 -11   7   18.78    7.59
  -8   2  -4   35.01    9.15
   8  -2   4   29.53   21.59
  -2  -5  13   49.20    4.90
  -2  -5  13   44.95    6.78
   2   5 -13   46.44    2.41
  -2  -3 -10   22.48    5.37
   2   3  10   17.80   17.78
   2 -11   8   22.24    7.66
   2 -11   8   22.79    8.30
  -3  -6  12   14.10    4.34
  -1  -4 -10  165.06   10.02
   1   4  10  125.20   18.03
   7  -2 -10   91.34    8.57
   7  -2 -10   72.90    5.12
   7  -2 -10   79.34    2.27
  -7   2  10   82.60    4.31
  -6  -5  -1   17.55    6.75
  -6  -5  -1   14.46    3.28
   3  -4  12  174.02   16.27
  -3   4 -12  166.65   13.21
   6  -7  -8  375.04   25.88
  -9   6   2  139.66   11.47
   9  -6  -2  156.55   23.09
   7  -7  -7  390.83   28.19
   7  -7  -7  328.10   21.60
   7  -7  -7  358.01   23.74
   3 -12   3  226.08   15.11
   3 -12   3  209.26   14.42
   6 -11   0  121.46   14.30
   6 -11   0  111.80   10.24
   2 -11  -2   65.98    6.91
   2 -11  -2   71.71    3.40
   0 -11   7   -1.72    3.11
   0 -11   7    4.29    4.31
  -3   5 -12   23.09    7.30
   3  -5  12   31.38   11.53
  -2  -8  11  186.67   10.63
  -2  -8  11  183.20    9.22
  -2  -8  11  208.82   19.06
   1  -9  11    1.54    2.71
   1  -9  11    2.55    1.14
   4   0  10    4.58    8.45
  -4   0 -10    8.73    3.74
   9  -6   0   -1.97    9.19
  -9   6   0   35.16   11.24
  -5  -6  -2   43.40    9.07
  -5  -6  -2   31.65    7.43
  -4  -8   8    1.30    0.81
  -4  -8   8   -0.03    2.79
  -1   5 -13   10.05    2.75
   1  -5  13   17.25    5.21
   7  -6  -8   -1.56    3.22
  -9   4  -1  404.07   27.94
   9  -4   1  339.04   34.47
  -3   0 -11  150.21    9.97
   3   0  11  173.55   22.34
  -8  -1  -1   38.83    9.31
   8  -5   5   26.78   17.42
  -8   5  -5   63.43    6.74
   5  -3  10    9.92   10.82
  -5   3 -10    1.50    1.69
   6   6  -6   10.40    2.60
  -6  -6   6   13.83    3.42
   3  -3 -12   62.87    9.76
  -3   3  12   52.77    5.31
  -6  -4  -3  372.63   27.13
  -6  -4  -3  427.04   31.30
   9  -5   1  216.47   30.26
  -9   5  -1  209.63   14.72
   3   4 -13    1.52    0.66
  -3  -4  13    0.85    1.47
   8  -9   0   -3.59    5.65
   8  -9   0   -0.69    7.29
  -3  -8  10  686.77   35.87
  -8   0   8   10.74    3.49
   8   0  -8    5.45    1.84
   8   0  -8   12.55    4.62
  -4  -7  10   73.63    6.00
  -2 -10   7   74.50    3.91
  -2 -10   7   85.88   13.41
   2  10  -7   68.79    4.62
   3 -12   4  167.72   13.77
   3 -12   4  176.45   12.21
   3 -12   2   50.56    6.78
   3 -12   2   55.08    9.01
  -7   1  -6  132.81   12.62
   7  -1   6  103.73   35.73
   6  -6  -9    3.56    2.85
  -5  11   2  262.60   19.40
   5 -11  -2  307.05   22.89
   5 -11  -2  317.69   21.43
   8  -9   1   -1.37    6.29
   9  -5  -4  706.46   37.47
  -2  -7  12   -0.03    2.57
  -2  -7  12    1.58    0.64
   1 -11   8  285.44   21.18
   1 -11   8  304.95   25.30
  -2   3  12  256.53   17.87
   2  -3 -12  242.16   16.97
   5 -11   6  539.97   26.79
   5 -11   6  555.01   25.55
  -1  -1 -12    2.74    2.90
   1   1  12    2.11    4.74
  -7  -4   7   90.82    7.62
  -7  -4   7   88.06    9.34
   7   4  -7   83.45    6.72
  -6  -6   2   25.09    8.86
  -6  -6   2   25.51    6.96
  -9   3   5   38.01   10.47
   9  -3  -5   49.65   18.73
   5  -4 -11  119.53   10.74
  -1   2 -13 1130.95   47.03
   1  -2  13 1223.39   51.88
  -3  -9   8    0.59    0.62
  -3  -9   8    1.21    1.11
  -8  -2   1    0.32    0.63
  -8  -2   1    0.00    2.44
   7  -3   7   50.80   25.12
  -7   3  -7   50.81    6.70
   8  -4   5   84.19   29.79
  -8   4  -5   74.94   17.06
   0   2  12   11.96    7.24
   0   2  12    0.76    1.20
   0  -2 -12   11.53    3.78
  -2 -10   1    0.61    1.43
  -2 -10   1    0.73    1.87
   3  -7  -9   66.31   10.92
   0  -9  11   12.40    4.66
   0  -9  11   13.44    4.82
   0  -9  11    7.99    2.73
  -6   5  -9   10.99    4.34
   6  -5   9    8.21    9.97
   0   6 -13    3.04    1.42
   0  -6  13    2.91    1.05
   0  -6  13    3.74    3.20
  -6  -4  10  345.78   23.80
   2 -12   3    0.22    2.17
   2 -12   3    3.42    5.55
   7  -7   7   61.19   14.25
  -7   7  -7  106.35   11.30
  -8   6  -5  106.17    9.88
   8  -6   5  143.00   24.29
   3  -3  12  117.80   14.35
  -3   3 -12  112.05   12.54
   6  -8  -7   48.01    9.14
  -1  -7  -7    1.52    1.13
  -1  -7  -7    4.05    3.82
  -4  -8   0    2.16    1.83
  -4  -8   0    3.50    1.74
  -8  -2   6  228.69   12.60
   8   2  -6  197.29   10.30
  -8  -2   6  199.22   11.94
  -9   1   3  160.87   13.13
   8  -9  -1  539.61   28.95
   8  -9  -1  601.23   29.57
   7   1 -10    0.27    0.66
  -7  -1  10    0.75    1.03
   2 -12   4   16.84    4.52
   2 -12   4   17.25    6.26
   3 -11   8  290.21   22.33
   3 -11   8  363.89   30.06
  -3  -6  -6    1.53    1.19
  -3  -6  -6    6.76    2.77
  -5  -3  12   12.13    3.31
  -9   2   0   15.31    4.02
   9  -2   0   35.48   28.32
   4 -12   3   18.92    4.10
   4 -12   3    9.61    7.04
   4  -7  -9  139.82   10.38
  -4  -4  -7   42.59    7.53
   4   4   7   60.28   21.00
  -4  -5  12    8.85    2.49
   9  -6  -3   11.95   11.33
   3  -6 -10  207.71   12.78
   9  -1  -2   14.73   14.98
  -9   1   2    7.07    2.94
   8  -8  -4   70.20    8.02
   8  -8  -4   76.03    4.93
   8  -8  -4   69.73   10.77
  -4  -1  13   11.36    2.98
  -4  -1  13    3.66    2.31
   4   1 -13   11.78    3.44
   4   1 -13   11.65    2.96
   4   3   8  106.21   21.72
  -4  -3  -8   86.93   13.62
   4 -12   2   -0.17    2.18
   4 -12   2    2.17    5.24
   1 -10  10  623.16   35.55
   1 -10  10  616.46   27.83
   7  -8  -6   90.69    7.58
   7  -8  -6  102.71   10.96
   7  -8  -6   91.83   11.78
   1   6 -13  435.27   18.29
  -1  -6  13  375.93   28.81
  -1  -6  13  397.61   26.52
  -9   2   5  292.44   24.38
   5  -7  10    8.84    6.20
  -5   7 -10   20.31    7.04
   6 -11   4  252.67   23.19
   6 -11   4  202.25   18.68
   9  -4  -5   93.76   18.34
  -9   3  -1   80.08    7.08
   9  -3   1   72.87   24.91
  -1 -11   4   65.76    6.15
  -1 -11   4   57.97    6.54
  -5  -5  -4   27.83    6.75
  -1 -10   9  231.71   10.26
  -1 -10   9  235.05   16.39
  -1 -10   9  216.80   11.92
   7 -10  -2   63.51   12.52
  -7  10   2   34.81    9.04
   7 -10  -2   71.34    6.90
   2  -9  11   -0.74    3.80
  -2   9 -11   -0.33    1.92
  -3  -9   0   17.99    5.08
  -3  -9   0   10.78    2.95
   0 -11   0  127.63   11.61
   0 -11   0  129.02   10.96
   0   6   9   -2.16    6.51
   0  -6  -9    0.13    1.73
   0   6   9    0.73    0.86
  -6   6  -9   67.88   10.97
   6  -6   9   65.35   17.27
   6  -4   9  825.79   46.74
  -6   4  -9  737.15   33.81
  -4  -2  13    8.48    3.69
   4   2 -13    9.42    2.89
  -4  -2  13    5.21    2.17
   3  -6  12  174.60   16.08
  -3   6 -12  173.36   13.77
   0  -9  -5  626.39   27.14
   0  -9  -5  617.49   25.93
   8  -4  -8    4.60    4.79
   8  -4  -8    2.12    4.93
   8  -4  -8    3.53    1.16
   0  -8  12  186.41   16.34
   0  -8  12  173.21   10.76
   0 -10  -3    6.31    1.82
   0 -10  -3   -0.61    3.39
  -9   6  -1  105.72   14.93
   9  -6   1   80.48   21.93
   2  -1 -13  415.27   30.70
   2  -1 -13  404.26   27.50
  -2   1  13  429.31   28.72
  -9   1   4  239.28   17.60
  -9   1   4  236.31   18.08
  -6   1  -8   35.92    9.20
   6  -1   8   20.39   13.95
   4  -7  11   38.15    9.92
  -4   7 -11   43.82   12.17
  -8   9  -2  338.06   27.59
   8  -9   2  287.98   23.06
  -2  -7  -6  563.42   24.13
   2 -12   2    8.24    5.84
   2 -12   2    8.18    2.94
   2 -10  10    0.46    1.60
   2 -10  10    8.26    6.56
  -1   8 -12   60.55    8.01
   1  -8  12   57.70    2.97
   1  -8  12   57.06    7.58
   7 -10   4    7.63    9.10
  -7  10  -4    1.99    2.87
   1 -10  -4  398.30   27.45
   1 -10  -4  465.56   23.91
  -5  -7   8   18.86    4.26
   5   7  -8   18.79    4.39
  -5  -7   8   19.87    4.22
   5  -2 -12   26.88    6.84
  -5   2  12   16.47    3.44
   4  -6 -10   20.14    4.14
   4 -10  -5   13.69    2.54
  -4  10   5    6.50    3.08
   4 -10  -5   17.28    7.08
   3 -12   5  327.95   31.00
   3 -12   5  225.98   14.54
  -6  -5   9  842.81   38.89
  -1 -11   5   49.16    6.08
  -1 -11   5   54.29    5.19
   3 -12   1    4.62    3.19
   3 -12   1   13.06    8.16
   8  -8   4  509.15   30.13
  -8   8  -4  519.59   23.72
   3   2  10   15.77   12.82
  -3  -2 -10   25.85    6.26
   4 -12   4    1.07    1.13
   4 -12   4    4.16    5.53
  -4  10  -9   31.48   10.59
   4 -10   9   32.37    7.53
   4  -3 -12 1587.62   12.11
  -1 -11   3  417.11   29.99
  -1 -11   3  445.30   20.14
   7  -3 -10  107.13   10.08
   6 -11  -1   24.28    6.12
   6 -11  -1   10.16    5.24
  -5   9  -9    1.57    1.37
   5  -9   9   -3.42    5.76
  -5  10  -8   79.84   12.92
   5 -10   8   85.27   12.29
   7  -5  -9    2.68    3.45
   3 -10  -5  635.25   28.60
  -3  10   5  580.45   24.29
   3 -10  -5  571.72   23.60
   0   5  10   23.65    5.78
   0   5  10   44.07   13.62
   0  -5 -10   38.50    7.36
  -6   3  11    4.13    1.41
   6  -3 -11   10.26    2.84
   6  -3 -11    3.15    1.68
  -4   2 -11   67.85    7.41
   4  -2  11   88.76   19.06
   2 -12   5  184.30   12.14
   2 -12   5  182.88   13.47
  -3   8   8  219.30   13.48
  -3   8   8  194.36    9.92
   3  -8  -8  235.81   17.01
   3  -1 -13  158.08   11.76
  -3   1  13  169.53   12.25
   3  -1 -13  166.23   10.15
   4  -8  -8  203.50   14.11
  -7  -3  -2    1.09    2.23
  -7  -3  -2    1.51    1.86
   4  -9  10   64.13   10.00
  -4   9 -10   63.88    8.51
  -1  -9  -4  186.83   13.88
  -1  -9  -4  200.58   12.94
   0   0 -13  233.28   18.34
   0   0  13  276.74   21.57
  -5  -5  11  158.57   12.35
  -6  10   4    9.57    4.09
   6 -10  -4    5.59    1.79
   6 -10  -4    3.84    6.64
   4   0 -13  127.68   11.30
  -4   0  13  137.88    7.87
  -4   0  13  131.31   11.31
   4   0 -13  138.96    8.01
   4 -12   1  472.61   24.79
   4 -12   1  459.98   22.60
  -5   0  -9  354.22   24.63
   5   0   9  346.98   40.35
  -6  -6   7  747.44   31.23
   6   6  -7  708.66   29.21
  -6  -6   7  768.29   32.93
  -2  -9  10  205.67   11.26
  -2  -9  10  269.00   25.05
  -2  -9  10  227.75   13.75
   9  -1  -1  110.62   36.49
  -9   1   1  105.40    9.74
   1  -6  13  592.41   30.85
  -1   6 -13  542.17   22.91
  -1  -3 -11   16.95    3.22
   1   3  11    8.80    7.70
   0   7   8   29.35    5.41
   0   7   8   10.77    8.53
   0  -7  -8   43.25   12.64
  -7  -4   0   22.31    7.17
  -7  -4   0   14.93    3.93
  -5  -7   0  146.65   14.65
  -5  -7   0  123.84   13.10
   8  -9  -2   73.42    7.56
   8  -9  -2   88.76   14.18
   7   3  -9   37.38    6.61
  -7  -3   9   42.77    7.83
   6  -5 -10   27.00   10.44
  -4  -5  -6   85.73   14.53
  -5  -6  10   44.16    8.77
   8  -3   5  318.79   40.22
  -8   3  -5  308.52   22.11
   2   0  12  133.99   17.27
  -2   0 -12  135.26    9.86
  -2   7   9   46.24    7.10
   2  -7  -9   61.86   13.92
  -2   7   9   40.23    9.59
  -4  11   3   -0.55    2.04
   4 -11  -3   -2.84    3.71
   4 -11  -3    0.92    0.85
   2  -6 -10  268.10   19.85
  -6  -3  11   46.95    5.48
   9  -7  -1   16.30   12.93
  -9   7   1   41.89   11.87
   3 -11  -3   18.53    6.52
  -3  11   3    8.23    3.34
   3 -11  -3   24.09    5.76
  -8   7  -5  182.91   15.51
   8  -7   5  179.79   19.81
   0 -10  10    7.47    2.53
   0 -10  10   10.91    4.19
   0 -10  10    9.27    4.23
   4   2   9  120.11   24.80
  -4  -2  -9  122.32   17.15
  -9   5  -2   55.50    8.90
   9  -5   2   16.05   14.72
  -4  -3  13  128.63   11.65
   9  -7   0   88.60   17.58
  -9   7   0  102.63   19.19
  -6  -6   1  258.78   19.70
  -6  -6   1  257.75   18.66
  -1 -11   6   93.31   11.94
  -1 -11   6   74.76   12.13
   5  -2  10   20.36   11.49
  -5   2 -10   23.80    7.36
  -1   3  12   26.90    5.19
  -1   3  12   39.71    8.06
   1  -3 -12   33.29    8.94
   3  -5 -11    1.50    1.86
  -7   9  -6   45.09   14.90
   7  -9   6   11.74    6.88
  -9   1   5   -0.59    2.31
  -9   1   5    2.48    1.72
   1  -9  -6  954.60   40.75
   1  -9  -6  984.91   40.46
  -1   9   6  899.22   36.87
   2   2  11   90.34   19.91
  -2  -2 -11   83.68    8.32
  -9   4  -2   92.40   10.65
   9  -4   2   79.12   24.44
  -1   1  13   77.97    6.35
   1  -1 -13   54.48    7.20
   1  -1 -13   73.77    6.26
   3  -2  12   82.48   12.20
  -3   2 -12   76.22    8.71
   8   1  -8    1.09    0.97
   8   1  -8    0.90    2.40
  -8  -1   8    1.23    1.37
   9  -5  -5   45.95   12.26
   9  -5  -5   77.76   18.36
  -8   0  -3  162.74   11.76
   8   0   3  104.65   26.57
  -3  -8  -3    3.71    2.94
  -3  -8  -3   -0.92    2.80
  -1 -11   2  125.79   11.33
  -1 -11   2  128.78   11.69
   2 -12   1  556.29   24.96
   2 -12   1  568.35   25.97
  -6   7  -9  114.15   10.80
   6  -7   9  119.25   17.62
   9  -6  -4   66.16   11.24
   9  -6  -4   76.97   14.54
  -6   3  -9   45.20   10.41
   6  -3   9   21.57   11.79
   9  -7  -2  184.38   22.48
   1  -1  13    3.11    5.40
  -1   1 -13   -1.51    2.08
   6  -9  -6  266.49   21.49
   0 -11   8    1.36    2.38
   0 -11   8    0.68    2.17
  -1  -8  12  474.49   20.80
  -1  -8  12  508.47   30.74
  -1  -8  12  422.69   28.30
  -8  -2   0  199.37   11.43
  -8  -2   0  204.40   13.85
   5  -7  -9  293.77   20.61
  -2 -10   8    5.89    4.16
  -2 -10   8   -0.04    1.34
  -2 -10   8    0.67    1.30
  -4  -7  -3    3.55    2.32
  -4  -7  -3    3.31    2.37
   8  -6  -7   91.51   11.56
   8  -6  -7  112.79   13.50
   8  -6  -7   80.27    2.02
   4 -12   5   -1.82    3.57
   4 -12   5   -1.99    4.73
   5 -10  -5  159.77    8.54
  -5  10   5  154.25   11.59
   5 -10  -5  156.82   11.92
   8  -7  -6  142.68   13.05
   8  -7  -6  123.00    9.82
   8  -7  -6  134.73    7.49
  -6  -2  -6    5.31    2.91
   6   2   6   -0.58   17.59
   1 -12   4  182.15   11.54
   1 -12   4  189.32   15.94
  -1  -9  11   -0.57    3.05
  -1  -9  11   -0.27    1.30
  -1  -9  11    0.63    0.56
   8  -9   3   51.64   13.47
  -8   9  -3   42.38   14.48
   8   2  -7  601.08   24.72
  -8  -2   7  611.77   25.65
  -8  -2   7  620.53   26.94
  -3  -5  13  322.50   26.61
   8  -1   4   12.39   22.41
  -8   1  -4   12.25    3.74
  -1 -10  -2  278.14   20.10
  -1 -10  -2  253.44   20.90
   9  -3  -6  408.29   36.93
   9  -3  -6  349.84   26.85
  -2  -6  13   24.31    7.32
  -2  -6  13   12.86    2.69
   9  -2   1  163.52   26.83
  -9   2  -1  163.46   10.56
   1 -12   3   25.05    6.77
   1 -12   3   22.13    5.74
  -7   2  -7   13.53    5.32
   7  -2   7   11.62   12.76
  -7  -2  10   -1.32    2.24
   7   2 -10    1.22    0.65
   2  -8  12  338.98   27.40
  -2   8 -12  279.48   19.32
   4  -5 -11    0.46    1.45
   6 -11   5  101.20   18.18
   6 -11   5  125.81   15.28
   9  -6   2   65.20   24.89
  -9   6  -2   58.64    9.32
   2 -12   6  292.15   24.70
   2 -12   6  317.90   23.37
   1 -11  -2   11.75    5.77
   1 -11  -2   16.48    3.57
   2  -4  13   64.25    7.58
  -2   4 -13   48.20    9.21
   0   4  11  127.02   17.01
   0  -4 -11  133.31   12.74
   0   4  11  125.42   10.18
   3 -12   6   44.42   12.03
   3 -12   6   32.30    8.73
  -7  -4   8  578.18   24.12
   7   4  -8  582.45   24.22
  -7  -4   8  593.85   32.72
  -6   9  -8   39.93   15.78
   6  -9   8   36.60   11.86
  -7   8  -7  191.74   13.69
   7  -8   7  171.78   18.78
  -9   2   6  396.32   28.73
  -9   2   6  409.79   32.03
   3 -12   0    9.54    6.20
   3 -12   0   15.17    3.44
  -2 -10   0   34.08    9.65
  -2 -10   0   31.39    6.26
  -2   8   8  538.24   27.68
  -2   8   8  484.35   19.86
   2  -8  -8  488.29   21.70
   5  -8  -8  362.25   25.76
   7  -9  -5   88.95    7.80
   7  -9  -5   93.14   12.47
  -4  -8   9   53.29   10.39
  -4  -8   9   36.98    5.71
   3 -10  10   15.23    5.93
  -3  10 -10   21.46    7.63
  -9   7  -1  402.15   30.56
   9  -7   1  405.80   34.24
   5 -12   2    0.08    6.12
   5 -12   2    2.11    2.58
  -3   7 -12    8.30    3.34
   3  -7  12   16.43    8.76
  -2  10   5  313.41   20.97
   2 -10  -5  307.98   20.63
   2 -10  -5  330.95   23.79
   8  -2  -9  138.78    8.89
  -8   2   9  153.78    8.70
   8  -2  -9  133.54   10.71
   8  -1  -9    4.70    3.04
  -8   1   9    8.13    3.21
   8  -1  -9    5.75    2.04
   4 -12   0   -1.05    1.76
   4 -12   0    0.08    4.14
   6   3   5  153.29   38.78
  -6  -3  -5  130.97   16.41
   5 -12   3   -0.27    6.80
   5 -12   3   -1.00    2.51
  -2   5  11  161.72    9.05
  -2   5  11  210.19   10.75
   2  -5 -11  202.11   11.80
   6 -10   7   25.20    7.76
  -6  10  -7   48.22   13.07
   4 -11   8   51.22   13.71
   4 -11   8   48.99   12.29
   5  -6 -10   43.73    8.62
   1 -12   5   67.11    6.95
   1 -12   5   66.27    6.71
  -1  -8  -6  345.28   24.36
  -1  -8  -6  359.04   26.32
  -8  -1  -2   47.62    5.70
   8   1   2   30.91   26.13
   2  -5  13    8.02    7.07
  -2   5 -13    7.70    4.24
   9  -1   0   13.13   11.47
  -9   1   0   25.01    6.60
   6   1   7    1.83   15.65
  -6  -1  -7   -0.92    2.96
  -7  -5   4   -0.37    1.88
  -7  -5   4    0.86    1.28
   4  -9  -7   93.85    9.66
  -5  11   3   -0.68    2.87
   5 -11  -3   -1.83    4.62
   5 -11  -3    3.95    1.78
   7 -10  -3  135.15   14.30
  -7  10   3  115.34   15.84
   7 -10  -3  110.45   12.56
   4  -1 -13  550.47   24.65
   4  -1 -13  490.64   21.57
  -4   1  13  589.60   24.24
  -6  -5  -2   49.03    9.55
  -6  -5  -2   40.88   10.76
  -9   3  -2   89.13   10.05
   9  -3   2   78.10   21.92
  -9   0   3  200.22   13.81
  -9   0   3  198.73   12.29
  -5  -4  12   58.85    6.01
  -3  -7  -5 1409.05   61.62
  -3  -7  -5 1411.37   59.11
  -8  -3   4   50.08   13.93
  -8  -3   4   51.41    4.30
  -5   8 -10  612.43   27.65
   5  -8  10  669.29   32.09
   5 -11   7  356.99   27.68
   5 -11   7  395.94   32.39
   9  -4  -6   19.95    9.99
   9  -4  -6   20.30   10.32
   2 -11   9  232.80   19.70
   2 -11   9  247.56   21.65
   6 -11  -2   43.98    9.76
   6 -11  -2   39.04   12.59
  -6  11   2   38.01   10.35
  -2   3 -13   17.05    4.86
   2  -3  13   10.55    5.96
  -3  -9   9   37.40    7.66
  -3  -9   9   33.47    6.56
  -3  -9   9   47.19   10.10
  -3   9   7  122.73   10.35
   3  -9  -7  155.31   10.68
  -3   9 -11   -0.41    2.55
   3  -9  11   -0.63    3.97
   7   1   5  236.44   38.97
  -7  -1  -5  228.80   14.00
  -7  -5   5    4.07    2.13
   7   5  -5    4.98    1.48
  -7  -5   5    5.37    2.92
   5 -12   1  134.59   16.09
   5 -12   1  134.95   12.80
   8  -5  -8  372.03   24.66
   8  -5  -8  412.53   29.40
   8  -5  -8  399.68   29.40
   1 -12   2   66.43   11.29
   1 -12   2   70.47    9.66
  -7  10  -5    5.04    1.68
   7 -10   5    3.89    8.24
  -8  -3   3   20.28    5.38
  -8  -3   3   14.90    3.93
  -9   0   4  150.35   10.54
  -9   0   4  140.51    9.39
   9  -7  -3  120.27   16.09
   9  -7  -3  105.45   16.20
   2 -11  -3    5.47    4.46
   2 -11  -3    3.35    1.69
   0   7 -13   44.67    8.81
   0  -7  13   35.59    6.82
   0  -7  13   45.71   11.60
  -4  -9   4  552.03   24.31
  -4  -9   4  572.18   28.91
  -8   9   3  131.52   16.25
   8  -9  -3  133.74   15.93
   8  -9  -3  147.37   11.20
  -4  -8  -1    6.89    4.35
  -4  -8  -1    9.01    4.71
  -7  -5   3    1.53    2.60
  -7  -5   3    1.44    2.42
  -4  -9   5   57.74    6.45
  -4  -9   5   73.28   14.98
   0  -8  -7  661.19   28.47
   0   8   7  625.83   26.01
   1 -11   9   11.05    5.08
   1 -11   9   14.76    5.89
  -9   0   2    0.19    1.61
  -9   0   2    0.05    1.45
   6   0 -12   58.62    4.49
   6   0 -12   60.74    4.02
  -6   0  12   71.58    5.88
   6   0 -12   69.81    4.29
   8  -8  -5   60.79   13.05
   8  -8  -5   38.26    5.88
   8  -8  -5   56.57    6.90
   0 -11  -1  240.70   20.62
   0 -11  -1  251.62   19.65
  -1 -11   7  439.11   29.67
  -1 -11   7  403.20   30.34
   7  -4 -10   79.82    1.64
   7  -4 -10   73.37    7.96
   7  -4 -10   95.29    9.25
  -2  -9  -3   11.71    3.22
  -2  -9  -3    8.93    5.41
  -4   8 -11  331.28   22.91
   4  -8  11  365.70   27.32
  -8  -3   5   83.26   10.98
  -8  -3   5   91.20    9.54
  -7  -2  -4    9.65    4.93
   7   2   4    4.99   23.29
   5 -12   4  239.33   20.65
   5 -12   4  246.07   17.79
  -6  -6   8   76.89    6.58
  -6  -6   8   76.40   12.41
   8  -3  -9   34.49    7.85
  -8   3   9   28.85    7.53
   8  -3  -9   31.26    4.95
   5   3   7    7.73   13.64
  -5  -3  -7   14.51    3.47
   8   0  -9   57.73    3.55
   8   0  -9   70.28    5.86
  -8   0   9   69.68    4.82
  -4  -6  -5    0.58    1.46
  -4  -6  -5    0.66    3.71
  -9   1   6   37.79    7.35
  -9   1   6   53.79   12.71
   1   3 -14    9.85    2.69
  -1  -3  14    0.91    2.57
  -1  -3  14    4.55    1.82
  -3  -9  -1  280.13   20.10
  -3  -9  -1  285.01   20.41
   5  -3 -12  257.71   18.02
   5  -3 -12  308.61   21.30
  -1 -11   1    7.28    3.06
  -1 -11   1    4.15    3.77
  -6  -1  12  358.36   24.72
   6   1 -12  344.68   22.77
   6   1 -12  335.52   22.16
  -4  -4  13   -1.54    2.46
  -5  -7   9  105.27   10.77
   7   0   6  275.69   39.84
  -7   0  -6  249.05   18.81
  -7   5  -8   23.34    6.48
   7  -5   8   25.26   20.21
  -4   1 -11  254.52   20.57
   4  -1  11  286.46   30.80
  -5  -6  -3    0.87    1.68
  -5  -6  -3    4.18    3.22
  -4  -9   3    0.86    1.34
  -4  -9   3    0.10    2.34
   2 -12   0  186.84   12.70
   2 -12   0  198.51   17.01
   3   1  11  103.89   19.05
  -3  -1 -11  122.17   13.44
  -2  -8  -5   25.79    7.00
  -2  -8  -5   21.77    6.72
  -5  -8   4    2.01    1.99
  -5  -8   4    1.71    3.19
   1 -12   6   17.25    6.37
   1 -12   6   15.16    3.92
  -3  -7  12  578.04   27.86
  -2  -2  14   17.80    4.76
  -2  -2  14   16.96    7.85
   2   2 -14   20.54    5.63
   2   3 -14  233.72   16.50
  -2  -3  14  232.76   19.41
  -2  -3  14  209.29   17.17
  -8   8  -5   64.10    9.25
   8  -8   5   50.79   12.89
  -5  -8   5   68.89    9.84
  -5  -8   5   68.49    4.40
   1   7 -13  120.31   12.24
  -1  -7  13  133.46   13.64
  -1  -7  13  132.35   10.11
   6  -1 -12  377.27   16.76
  -6   1  12  361.11   15.99
   6  -1 -12  377.28   16.93
   6  -1 -12  353.87   15.66
  -4  -9   6    7.71    2.83
  -4  -9   6    8.67    4.34
   4   9  -6    6.17    2.21
   1  -7  13   -2.90    3.69
  -1   7 -13    4.64    2.41
  -7  -5   6   55.32    6.62
   7   5  -6   52.03    5.50
  -7  -5   6   53.21    6.38
   4 -12   6  193.30   17.96
   4 -12   6  202.13   17.10
  -4  -1 -10  190.91   17.54
   4   1  10  176.09   28.88
   7  -6   8  548.44   35.73
  -7   6  -8  616.44   28.46
   3  -2 -13   73.30    8.87
   3  -2 -13   71.82    7.09
   1   2 -14  143.98   11.63
  -1  -2  14  148.98   20.35
  -8  -3   2  421.63   28.63
  -8  -3   2  445.90   22.57
  -8   5  -6   63.14    8.54
   8  -5   6   83.57   26.18
  -2   6 -13   32.84   10.31
   2  -6  13   33.69    7.78
   6  -4 -11   12.59    5.49
   9  -7   2  280.98   33.52
  -9   7  -2  283.39   25.40
  -9   0   5   62.62   12.37
  -9   0   5   56.25   10.66
   7 -11   1  289.89   25.09
   7 -11   1  284.87   21.46
  -1  -4  14   61.26    8.24
  -1  -4  14   49.92    5.84
   1   4 -14   57.17    7.68
  -3 -10   4   81.96   11.75
  -3 -10   4   92.27   15.69
  -5  -4  -6    6.91    3.64
   5   4   6    6.73   16.37
  -1   6  10   97.93   13.48
  -1   6  10   96.25    7.04
   1  -6 -10   95.81   11.95
   2  -2 -13   30.60    6.76
  -2   2  13   36.71    7.80
   2  -2 -13   36.44   11.18
   3 -11   9   -0.93    4.85
   3 -11   9    5.05    7.18
  -5  -2  -8   26.60    5.58
   5   2   8   -1.44    9.73
   5  -9  -7    1.38    3.19
  -6  -6   0   17.75    5.24
  -6  -6   0   19.63    5.77
  -3 -10   5   55.91    8.13
  -3 -10   5   81.21    8.14
  -7  -4  -1  253.29   18.10
  -7  -4  -1  261.46   20.26
   9  -6  -5   -0.58    4.80
   9  -6  -5    2.32    4.91
  -3  -8  11    1.69    1.88
   7 -11   2   89.89   11.95
   7 -11   2   75.39   13.08
   1  -7  -9  597.84   26.62
  -1   7   9  597.66   25.75
  -1   7   9  701.19   35.04
  -6   8  -9  157.59   13.97
   6  -8   9  168.11   20.90
  -4  -7  11    8.33    3.10
  -6   2  -9   34.91    8.29
   6  -2   9   18.38   12.81
  -9   5  -3    6.08    3.42
   9  -5   3   -0.86   11.49
  -6  -4  -4  169.57   15.37
  -6  -4  -4  184.04   15.12
   3  -4 -12  371.62   16.95
  -3   4  12  367.66   15.81
  -7   1  11  236.33   16.28
   7  -1 -11  209.37   16.03
   7  -1 -11  227.61   15.46
   5 -12   0   50.51    5.53
   5 -12   0   44.47   10.21
  -8   6  -6   95.97    9.91
   8  -6   6   83.46   21.58
  -7  -5   2   53.58   11.52
  -7  -5   2   45.18    8.42
  -8   9  -4   65.10   21.35
   8  -9   4   65.84   16.95
  -1 -10  10  195.14   15.42
  -1 -10  10  168.28   12.77
  -1 -10  10  167.40   16.81
   7   0 -11   92.34    6.83
   7   0 -11   78.07    6.21
  -7   0  11   77.78    6.57
   7  -7  -8   -1.10    3.08
  -7   4  -8   -1.15    4.08
   7  -4   8   -0.23   10.95
  -4  -6  12    4.79    3.75
  -5  -7  -1   53.17    6.48
  -5  -7  -1   52.72   10.38
  -9   0   1   50.84    6.03
   3  -1  12   24.41   12.16
  -3   1 -12   50.34    4.90
   1   2  12   98.55   16.55
  -1  -2 -12   86.52    9.88
  -2   2 -13   28.71    7.24
   2  -2  13   27.00    7.17
   5  -5 -11   96.18    8.95
   2 -12   7   62.94   13.98
   2 -12   7   42.09    7.44
  -5  -8   3   21.07    6.02
  -5  -8   3   17.50    5.47
   0   1  13 1834.25   21.00
  -8  -3   6   14.44    3.65
  -8  -3   6    6.88    3.76
   8   3  -6   12.25    2.22
  -6   0  -8   22.52    6.52
   6   0   8   13.61   13.47
   9  -5  -6   10.07    9.36
   9  -5  -6    8.41    7.52
  -6  -5  10    2.44    2.16
   1 -12   1   26.68    7.95
   1 -12   1   25.97    4.21
   7 -11   0  240.16   22.23
   7 -11   0  270.84   24.83
   5   8  -6   50.04    4.06
  -5  -8   6   58.82    6.81
  -5  -8   6   50.30    6.44
  -5  -1  13   -0.42    1.25
   5   1 -13    0.20    0.59
  -5  -1  13    0.65    0.82
   9  -4   3   22.38   15.39
  -9   4  -3   24.66    5.74
  -8  -2  -1  180.93   15.64
  -8  -2  -1  176.19   20.44
   8  -4   6   19.29   14.74
  -8   4  -6    3.60    3.26
   2  -9  -7  171.69   17.01
  -2   9   7  137.82   10.10
   2  -9  -7  161.74   12.38
  -3 -10   3    1.55    2.95
  -3 -10   3    1.20    1.71
  -9   8   0   25.44    7.37
   9  -8   0   28.74   13.87
   4 -12  -1   40.60    7.25
   4 -12  -1   27.54    8.52
   3 -12   7  178.79   16.66
   3 -12   7  162.93   16.45
   5  -1  10  103.63   21.36
  -5   1 -10  136.30   12.19
   9  -8  -1   23.98   12.68
  -9   6  -3  549.40   26.53
   9  -6   3  538.81   36.33
   0   3 -14  149.08   12.87
   0  -3  14  144.95   13.19
   2   1 -14  325.50    7.84
  -2  -1  14  336.33   20.87
  -2  -4  14  138.94   14.21
  -2  -4  14  137.13   10.33
   2   4 -14  130.62   11.38
  -6  -4  11    1.48    2.50
   3 -12  -1  248.37   20.48
   3 -12  -1  259.43   20.07
  -3 -10   6   37.95    6.65
  -3 -10   6   31.89    6.58
   0  -4  14   78.36    8.60
   0   4 -14   76.29    9.79
  -8  -2   8  133.20   14.07
  -8  -2   8  128.34   10.96
   8   2  -8  134.11    9.89
  -1   0 -13   13.68    3.95
   1   0  13   10.64    6.72
   5 -12   5   51.44   10.96
   5 -12   5   57.66   12.52
  -9   2  -2  130.93   11.95
   9  -2   2   81.23   28.31
  -6  -2  12   -0.07    2.10
   7  -8  -7  210.57   15.44
   7  -8  -7  212.66   10.77
   8 -10   1  226.53   22.63
   8 -10   1  237.48   20.93
  -2  -8  12   57.74    6.50
  -2  -8  12   53.02    3.89
   6 -11   6   79.98   11.35
  -5   0  13  107.32    8.03
   5   0 -13  162.10   12.80
  -5   0  13  142.06   11.60
   5   0 -13  160.38   12.33
   9  -7  -4   11.43    8.97
   9  -7  -4    0.23    4.21
  -2  -5  -9    4.41    2.62
   2   5   9   12.98   14.44
   9  -1   1  156.31   29.00
  -9   1  -1  199.05   22.41
  -2 -10   9   18.09    4.18
  -2 -10   9   28.97    3.05
  -2 -10   9   15.37    3.95
   8 -10   0   19.08   12.78
   8 -10   0   39.53   12.88
  -2   4  12  172.68   13.55
  -2   4  12  146.34    3.63
   2  -4 -12  160.29   12.76
  -6  10   5   14.27    6.34
   6 -10  -5   26.37    3.71
   6 -10  -5   29.86    6.83
   7  -6  -9   15.41    5.88
  -7  -3  -3    0.53    1.34
  -7  -3  -3    0.13    2.57
   7 -11   3  188.91   21.55
   7 -11   3  185.54   16.47
   0   3  12  456.33   21.39
   0  -3 -12  455.18   23.21
   0   3  12  495.02   25.40
   4  -4 -12   37.27    8.58
  -1   5  11  273.43   22.64
  -1   5  11  179.87   13.80
   1  -5 -11  182.87   16.38
  -4  -9   2   46.24    4.67
  -4  -9   2   51.67    6.02
  -9   2   7   22.17    7.52
   9  -2  -7    6.73    5.21
  -7   2  11   44.10    3.24
   7  -2 -11   28.97    3.63
   7  -2 -11   39.73   10.31
   7  -2 -11   29.56    4.84
   9  -3  -7    2.39    4.23
   9  -3  -7   -0.47    6.28
   7  -7   8    7.26    9.79
  -7   7  -8   13.28    4.56
   0 -11   9  231.44   17.05
   0 -11   9  289.16   25.02
   0 -10  -4 1758.30   76.09
   0 -10  -4 1818.52   28.65
   5  -5  11   72.80   18.95
  -5   5 -11   64.50   12.03
  -5  -2  13  248.08   17.81
   5   2 -13  202.68   14.90
   5   2 -13  230.70   15.32
   6  -7  -9   46.59    6.21
   3   2 -14   18.54    4.34
  -3  -2  14    5.00    2.23
  -3  -2  14    7.90    5.64
   4 -11  -4  182.80   17.41
   4 -11  -4  118.47    9.19
  -4  11   4  166.94   13.76
   8  -4  -9  104.44   10.56
   8  -4  -9   96.92    7.03
   8  -4  -9  123.87   14.34
  -4  -9   7   43.17    5.99
  -4  -9   7   42.65    6.45
   4   9  -7   36.73    3.84
   7   1 -11  337.01   14.58
   7   1 -11  345.51   15.13
  -7  -1  11  289.22   19.85
  -9   8  -1   55.49   11.79
   9  -8   1   37.93   13.51
  -1  -1  14  567.77   29.77
   1   1 -14  571.54   28.50
  -7  -3  10  327.12    7.39
   1 -10  11    2.96    4.13
   1 -10  11    8.40    6.44
   1  -9  12  100.61    8.67
   8   1  -9  103.71    8.64
   8   1  -9   98.89    9.12
  -8  -1   9  105.62   11.31
  -2  -1 -12   -0.22    1.48
   2   1  12    0.13    7.70
   4  -2 -13    6.94    3.72
  -4   2  13   11.91    2.58
   4  -2 -13   16.06    4.98
   6  -2 -12    0.78    1.05
  -6   2  12    0.77    0.77
   6  -2 -12    0.89    0.97
  -2  -6  -8   92.93   14.06
   2   6   8   68.45   17.51
  -4   5 -12  175.39   17.59
   4  -5  12  160.98   18.59
   5 -10   9  138.71   22.79
  -5  10  -9  126.77   13.97
   3  -8  12    9.40    6.60
  -3   8 -12    7.01    2.79
   9  -8  -2  794.71   37.87
   9  -8  -2  957.35   46.39
   1   5 -14   -0.07    0.99
  -1  -5  14    2.15    0.83
  -1  -5  14    0.49    1.15
   8  -7   6   50.74   18.70
  -8   7  -6   52.00    8.52
   1  -8  -8  274.72   19.87
  -1   8   8  249.61   16.80
  -3  -5  -8    1.50    2.54
   3   5   8   -4.77   11.68
  -7  -5   7   21.43    6.01
   7   5  -7   18.14    2.25
  -7  -5   7   20.99    3.74
   7  -1   7  117.48   27.57
  -7   1  -7  120.12   16.03
  -2 -10  -1   13.31    4.08
  -2 -10  -1   24.00    5.01
   8 -10   2  362.10   20.71
   8 -10   2  310.46   26.41
  -3  -4  -9   39.71    6.06
   3   4   9   37.05   19.30
   6  -8  -8  579.57   27.26
  -8  -3   1  131.75   12.26
  -8  -3   1  132.64   14.76
  -7  -4   9    0.05    2.23
  -3  -6  13  112.51   14.05
   0 -12   4  231.15   19.78
   0 -12   4  246.18   18.88
  -9   0   6   72.30   11.40
  -9   0   6   80.39   10.35
  -1 -11   8  110.87   11.59
  -1 -11   8   92.05    7.80
  -2  -4 -10    6.88    4.74
   2   4  10   19.83   17.64
  -3  11   4   72.53    6.94
   3 -11  -4   73.79    6.91
   3 -11  -4   64.14   11.27
   0   2 -14    1.27    2.00
   0  -2  14   -0.79    2.98
  -5   6 -11   41.83    6.51
   5  -6  11   62.94   14.97
   7  -9   7   58.47   12.03
  -7   9  -7   55.16    9.11
   8  -9  -4    1.43    3.32
   8  -9  -4    0.81    0.45
   8  -9  -4   -2.95    5.00
  -1   2  13  227.34   16.47
   1  -2 -13  250.57   17.53
   5  -4  11   35.65   17.88
  -5   4 -11   55.08    8.80
   3   3 -14  101.70    9.11
  -3  -3  14  113.94   12.42
   6 -11  -3   48.24    6.02
  -6  11   3   40.45    7.69
   6 -11  -3   43.35   11.05
   8 -10  -1  142.11   13.22
   8 -10  -1  130.26   17.78
   0  -9  12   66.80    9.15
   0  -9  12   62.28    8.37
   0  -9  12   54.29    4.56
   1 -12   7  188.02   16.16
   1 -12   7  188.77   16.63
   4  -4  12  180.82   19.64
  -4   4 -12  180.52   14.80
  -2  -9  11   92.06    9.40
  -2  -9  11   90.28    7.29
  -2  -9  11   99.24   10.43
   4 -10  -6   31.51    5.73
   4 -10  -6   43.65   11.70
  -4  10   6   28.56    3.94
  -3  -1  14  460.75   21.63
  -3  -1  14  487.98   21.88
   3   1 -14  540.13   24.09
   1 -10  -5   49.72    7.49
   1 -10  -5   42.04    3.89
   7 -10  -4  290.35   20.49
  -7  10   4  276.29   22.45
   7 -10  -4  303.81   23.27
   7 -11  -1   30.59   15.51
   7 -11  -1   33.00    6.02
  -5  -5  -5  167.15   14.77
  -5  -5  -5  157.60   13.32
  -5  -8   2   86.41   11.23
  -5  -8   2   86.07   12.71
  -5  -1  -9   -2.28    3.37
   5   1   9   -0.73   14.50
   0   5 -14   17.62    5.65
   0  -5  14   25.25    6.77
  -5  -6  11   96.21    9.85
   4 -10  10   -2.62    4.57
  -4  10 -10    0.53    1.60
   0 -12   5  366.24   21.97
   0 -12   5  383.30   18.45
   2 -10  11  202.47   22.88
   5   8  -7   27.20    3.01
  -5  -8   7   38.04    3.44
   9  -3   3    4.57   18.46
  -9   3  -3   17.73    5.35
   1   6   9  133.57   23.33
  -1  -6  -9  161.38   14.19
   7  -3   8   23.78   16.37
  -7   3  -8   10.91    4.46
  -3 -10   2  255.92   18.26
  -3 -10   2  257.61   19.47
   0 -12   3   33.96    6.86
   0 -12   3   33.75    6.00
  -1 -11   0  118.65   10.88
  -1 -11   0  112.06   11.96
  -9   1   7   60.73    7.32
  -7  -5   1  119.96   13.82
  -7  -5   1  115.85   17.64
  -8   0  -4   26.84    7.84
   8   0   4   25.43   20.29
   9  -4  -7  172.87   18.23
   9  -4  -7  164.97   21.81
   4  -6  12   17.85   11.81
  -4   6 -12   23.00    4.60
   6  -6 -10  193.41   15.43
  -6  -7   4  213.67   16.11
  -6  -7   4  198.58   17.29
  -4  -8  10  158.44   18.74
   3 -10  -6  119.15   13.58
   3 -10  -6  122.85    9.25
   7 -10   6    2.32    5.31
  -7  10  -6   -2.72    3.45
  -1  -5 -10   14.89    4.18
   1   5  10    7.39   10.81
  -6  -7   5   26.71    6.35
  -6  -7   5   34.89   12.50
  -2  -7  13    0.11    0.35
  -2  -7  13    1.17    2.86
   5 -12  -1   48.44    7.13
   5 -12  -1   47.22    9.54
   8  -7  -7    0.59    1.91
   8  -7  -7    1.32    0.61
   8  -7  -7    6.75    3.87
  -9   0   0    1.12    2.39
   9   0   0    3.50   16.45
   6 -12   2   95.68   16.41
   6 -12   2   90.02   10.83
  -5   1  13  158.65   12.76
   5  -1 -13  191.52   15.56
   5  -1 -13  164.74   13.16
  -5   1  13  171.66   12.87
  -3 -10   7   64.57    8.02
  -3 -10   7   56.22    7.37
   3  10  -7   52.14    4.92
   2  -7  13   10.87    6.60
  -2   7 -13   14.94    4.12
  -9   7  -3  168.46   14.70
   9  -7   3  152.11   25.11
  -8   3  -6   12.14    4.74
   8  -3   6    4.92   15.09
   0  -9  -6   14.98    5.17
   0  -9  -6   12.58    3.41
   1 -11  -3  210.63   20.31
   1 -11  -3  177.04   15.41
  -8  -3   7    2.02    2.13
   8   3  -7    1.55    1.09
  -8  -3   7   -0.42    1.19
   0 -10  11  206.41   16.26
   0 -10  11  233.04   17.39
   0 -10  11  217.15   19.90
  -5   9 -10  444.23   22.41
   5  -9  10  357.13   21.37
  -1 -10  -3  213.18   10.53
  -1 -10  -3  228.51   16.71
  -1  -9  -5  168.14   15.57
  -1  -9  -5  177.30   15.75
  -6  -6   9   41.41    9.69
   2 -12  -1   30.50    6.57
   2 -12  -1   40.27    8.99
   8   1   3  225.25   32.64
  -8  -1  -3  255.74   22.73
   5 -11  -4    5.65    1.62
   5 -11  -4    3.05    5.02
  -5  11   4    9.62    4.53
   6 -12   1 1161.56   51.43
   6 -12   1 1088.75   50.17
   7 -11   4  375.47   20.54
   7 -11   4  340.26   22.39
  -5  -5  12   89.39   12.81
   4 -12   7  185.38   16.87
   4 -12   7  180.41   19.38
   6 -12   3  201.97   20.20
   6 -12   3  219.32   17.01
   8  -6  -8  508.25   24.88
   8  -6  -8  425.76   18.55
   8  -6  -8  523.93   24.93
  -9  -1   3   -0.22    2.82
  -9  -1   3   -0.11    2.18
  -2 -11   4    1.99    1.69
  -2 -11   4   -0.12    1.47
  -9  -1   4    0.36    2.04
  -9  -1   4    2.40    2.35
  -3  -9  10  327.79    4.34
  -3  -9  10  284.23   20.97
  -3  -9  10  304.38   20.33
   7  -9  -6  138.54   10.40
   7  -9  -6  159.26   15.36
   7  -9  -6  127.54    9.46
  -4  -5  13  538.63   32.23
  -2 -11   5    6.90    2.64
  -2 -11   5    8.13    3.51
  -2   9 -12  214.64   21.00
   2  -9  12  199.73   19.36
   3   6   7  587.95   51.69
  -3  -6  -7  741.76   33.17
   5 -11   8   10.39    4.65
   2   0 -14  263.85   20.31
   2   0 -14  376.96   17.55
  -2   0  14  312.29   22.52
   9  -8   2   -1.92    8.06
  -9   8  -2   11.07    4.68
   2   5 -14  116.07    8.98
  -2  -5  14  110.11   13.74
  -2  -5  14  104.54    7.83
   3   3  10  -12.79   12.17
  -3  -3 -10   -1.19    2.58
  -6   5 -10   85.20    8.93
   6  -5  10   94.93   18.40
   1 -12   0  239.11   17.05
   1 -12   0  242.25   18.06
   7  -5 -10  108.53   14.68
  -3  -8  -4   39.04    4.64
  -3  -8  -4   37.03    7.67
  -5  -3  13   40.39    8.11
  -6  -7   3  208.18   17.30
  -6  -7   3  204.01   17.08
   4 -11   9   62.87   10.50
   8 -10   3   13.82    9.44
  -6  10  -8   78.00   20.24
   6 -10   8   83.37   13.49
   0 -11  -2  555.33   27.40
   0 -11  -2  562.89   27.94
   8  -1   5  930.66   54.63
  -8   1  -5 1030.16   45.91
  -6  -7   6  123.54   12.13
  -6  -7   6  123.93    9.72
   2  -1  13  296.92   25.80
  -2   1 -13  284.75   20.71
   9  -8  -3   15.33    7.75
   9  -8  -3   19.89   11.25
   0 -12   6   68.17    8.65
   0 -12   6   54.71    6.67
   5 -10  -6  255.64   19.81
  -5  10   6  241.36   17.94
   5 -10  -6  272.35   18.27
  -4  -7  -4  146.45    7.16
  -4  -7  -4  136.67   12.78
   7  -3 -11  164.80   13.71
  -7   3  11  134.22    9.84
   7  -3 -11  139.27   10.17
  -6   6 -10  172.74   14.96
   6  -6  10  147.84   19.46
   4  -3  12  459.38   27.98
  -4   3 -12  489.50   23.39
  -4  -8  -2   18.54    4.84
  -4  -8  -2   14.16    4.35
   8  -8  -6  146.82    2.80
   8  -8  -6  156.21   12.83
   8  -8  -6  159.75   15.08
  -1  -7  -8   36.02    5.56
   1   7   8   31.12   18.95
   6  -9  -7  143.56   13.61
   4  -9  11  326.85   11.65
  -4   9 -11  320.36    7.85
   5  -7  11  390.00   22.90
  -5   7 -11  351.11   20.84
   5 -12   6   44.91    9.00
   5 -12   6   58.05   12.87
   0 -12   2    0.18    1.68
   0 -12   2   -0.32    2.81
  -2  -7  -7    2.34    2.01
  -6  -5  -3  184.92   14.97
  -6  -5  -3  236.36   17.13
  -3  -4  14    6.46    2.80
   3   4 -14   16.69    2.43
  -3  -4  14   13.72    2.28
  -4  -9   1    6.97    4.54
  -4  -9   1   16.60    5.21
  -6  -3  12   27.51    3.37
   5  -3  11  365.40   30.10
  -5   3 -11  334.23   16.90
   8 -10  -2   13.54    5.41
   8 -10  -2   13.22    8.87
   9  -6  -6  405.88   21.34
   9  -6  -6  420.37   25.99
   0   8 -13    0.85    0.97
   0  -8  13    1.61    0.82
   0  -8  13   -1.60    3.08
  -1   4 -14   51.35    9.06
   1  -4  14   68.02   11.19
   4   4   8  314.26   37.15
  -4  -4  -8  301.17   21.14
   8  -9   5  193.73   20.81
  -8   9  -5  207.23   20.46
  -2 -11   3  363.47   17.79
  -2 -11   3  339.93   17.00
   3   0 -14  475.92   23.67
  -3   0  14  489.22   22.15
   3   0 -14  448.98   23.56
  -6  -6  -1    1.31    2.37
  -6  -6  -1    2.73    2.84
  -9  -1   2    1.39    1.68
  -9  -1   2    2.89    1.63
  -1   4  12    1.27    2.06
   1  -4 -12   -2.16    2.50
  -1   4  12   -0.09    0.55
   2 -12   8  213.03   13.58
   2 -12   8  237.45   19.73
  -7  -2  11   57.67    5.09
   7   2 -11   54.79    2.12
  -9  -1   5   18.97    4.12
  -9  -1   5   18.60    5.01
  -5  -7  10  118.97   11.27
  -7   8  -8    5.38    4.08
   7  -8   8   -2.29    9.70
   2 -11  10    5.38    5.57
   2 -11  10    6.21    7.93
   4  -7 -10   82.50    8.43
   3  -7 -10    1.00    1.51
  -8   1  10   44.66    7.81
   8  -1 -10   47.30    2.90
   8  -1 -10   50.53    6.00
  -3  -9  -2   10.99    4.78
  -3  -9  -2   14.52    4.93
  -2 -11   6    1.55    1.64
  -2 -11   6   -1.57    2.78
   4   9  -8    4.89    2.88
  -4  -9   8    5.75    2.26
  -4  -9   8    9.69    4.40
   5  -4 -12   22.86    5.18
  -6   4 -10   97.89   13.00
   6  -4  10   85.58   21.81
   1 -11  10    9.53    5.05
   1 -11  10    6.14    3.69
  -3   5 -13  192.46   15.25
   3  -5  13  230.66   19.81
   0  -1  14   11.23    8.34
   0   1 -14   21.47    5.99
  -2  -3 -11    4.24    2.88
   2   3  11    1.76    9.02
  -1  -4 -11  223.56   16.61
   1   4  11  190.77   23.47
   9  -7  -5  554.54   28.61
   9  -7  -5  482.99   25.64
   6  -9   9   69.78   14.76
  -6   9  -9   81.16    9.42
   6 -12   0  119.05   13.43
   6 -12   0  117.02   12.35
   4   0  11   32.52   18.44
  -4   0 -11   54.36    6.19
   1  -8  13    1.74    3.91
  -1   8 -13    1.43    1.24
  -6   1  -9  193.65   21.77
   6  -1   9  147.35   31.87
   3  -4  13  162.93   16.67
  -3   4 -13  161.70   16.03
   2 -11  -4    0.40    1.28
   2 -11  -4    3.77    3.20
  -8   2  10   40.38    5.31
   8  -2 -10   39.61    5.41
   8  -2 -10   31.13    5.73
  -1   3 -14    2.29    3.14
   1  -3  14    3.01    4.05
   4 -12  -2    1.96    1.13
   4 -12  -2    4.81    5.44
   4  -8  -9  113.06   10.96
   9  -5   4   26.11   18.02
  -9   5  -4   21.87    6.09
   6 -12   4  125.95   18.49
   6 -12   4  148.32   13.64
  -1  -9  12   17.98    3.72
  -1  -9  12   22.69    3.90
  -1  -9  12   18.75    5.47
  -8   8  -6   74.73    8.96
   8  -8   6   73.77   17.45
  -1   0  14 1578.14   70.96
   1   0 -14 1679.34   74.08
   7 -11  -2   42.80    4.99
   7 -11  -2   53.87   11.54
   4  -7  12    2.76    5.93
  -4   7 -12   11.30    3.94
  -4  -3  -9  105.55   16.06
   4   3   9   89.02   25.80
  -1   5 -14    1.89    2.03
   1  -5  14    0.13    2.02
  -7  -4  -2    0.96    2.64
  -7  -4  -2    3.14    1.96
   3 -12   8    9.33    7.09
   3 -12   8   -0.03    2.30
   3  -8  -9    6.25    3.50
   0  -6  14   22.51    3.26
   0   6 -14   24.80    4.03
   0  -6  14   31.27    7.24
  -8  -3   0   26.59    6.59
  -8  -3   0   33.20    6.19
  -4  -5  -7   25.58    4.78
   4   5   7   53.44   34.22
  -7  -5   8    7.88    2.73
  -7  -5   8   15.89    4.25
  -5  -8   1   65.45    7.41
  -5  -8   1   55.74   11.95
   3 -12  -2  129.50   12.49
   3 -12  -2  116.19   10.07
   1   6 -14   29.38    2.55
  -1  -6  14   27.88   10.18
   9  -1   2   -6.56   17.99
  -9   1  -2    8.94    5.09
   9  -6   4  479.84   35.66
  -9   6  -4  401.35   20.45
   6  -3 -12  399.76   17.98
  -9   0   7  295.53   21.38
  -9   0   7  293.59   21.92
  -1   9   7  108.48    8.51
   1  -9  -7  135.64   19.34
   1  -9  -7  150.58   13.03
  -3 -10   1   94.67    9.02
  -3 -10   1   95.90   15.76
   9  -5  -7   10.96    2.83
   9  -5  -7    7.56    6.72
   9  -5  -7   22.76   15.60
   3  -3 -13    1.47    1.62
  -3   3  13   -0.20    0.58
  -8  -2  -2  168.00   17.72
   3 -10  11   27.11    7.83
  -3  10 -11   16.63    5.36
  -3   0 -12   51.67   11.76
   3   0  12   46.13   16.84
  -5  -8   8  515.63   28.03
   5   8  -8  465.47   20.67
  -5  -8   8  481.86   21.15
   3  -6 -11   45.61   12.27
  -8   0  10  246.28   18.41
   8   0 -10  265.08   18.67
   8   0 -10  227.01   15.32
  -2  10   6   20.41    5.06
   2 -10  -6   41.74    6.35
   2 -10  -6   36.40    7.38
   8  -5  -9    2.60    3.53
   8  -5  -9    0.32    0.49
   8  -5  -9    1.51    3.29
  -6  -7   2  213.65   18.23
  -6  -7   2  215.50   15.37
   6  -7  10   78.88   14.69
  -6   7 -10   71.90    8.91
   6  -5 -11    6.64    3.62
  -5  -7  -2   13.88    4.39
  -5  -7  -2   16.73    5.94
   4  -6 -11    4.62    3.01
  -9   4  -4  487.30   23.04
   9  -4   4  565.05   42.71
  -2  -9  -4    6.52    3.35
  -2  -9  -4    5.73    4.53
   6 -11   7   49.95   15.77
  -6  11  -7   39.48   14.54
  -4  -2  14    7.24    2.44
   4   2 -14   17.55    4.99
  -4  -2  14    6.47    4.99
   6   7  -7   28.06    2.18
  -6  -7   7   35.28    2.85
  -6  -7   7   35.01    8.11
   8   2  -9   -0.76    1.99
  -8  -2   9   -1.80    2.50
   8   2  -9    0.90    0.82
   9  -2   3   -6.65   18.71
  -9   2  -3    0.33    2.13
   0   6  10  247.42   23.22
   0   6  10  279.73   19.49
   0  -6 -10  266.31   18.97
   4   1 -14   19.58    3.15
  -4  -1  14    5.70    2.43
  -4  -1  14   15.65    4.88
   1 -12   8    0.82    1.92
   1 -12   8    3.90    3.93
   3  -6  13  372.99   21.27
  -3   6 -13  342.39   17.02
  -3 -10   8   79.39    7.46
  -3 -10   8   78.73   15.34
  -1  -8  13    1.58    0.93
  -1  -8  13   -1.78    3.05
  -1  -8  13    0.62    1.88
  -6  -2  -7    6.46    1.93
   6   2   7   -2.71   13.47
   5  -2 -13   68.83   10.96
  -5   2  13   56.35    3.04
   5  -2 -13   58.35    5.36
  -6  -3  -6  205.06   16.76
   6   3   6  215.93   34.05
  -2 -11   2   26.10    6.77
  -2 -11   2   42.98    8.50
   2  -3 -13   28.75    7.96
  -2   3  13   36.95    4.26
  -7  -5   0    3.67    2.67
  -7  -5   0    4.66    4.30
   3  -3  13   27.90   11.65
  -3   3 -13   23.46    5.92
   9  -2  -8  151.00   13.89
  -9   2   8  136.73   11.26
   7  -2   8  506.37   41.13
  -7   2  -8  498.44   22.86
   0 -12   7   61.85   13.36
   0 -12   7   81.46   20.29
  -7  -2  -5    4.90    1.88
   7   2   5   33.40   23.42
   7   1   6    6.98   15.68
  -7  -1  -6   16.05    5.06
  -9  -1   1   26.42    5.91
  -9  -1   1   23.76    6.26
   0   7   9   27.60    3.93
   0  -7  -9   37.81    6.62
   0   7   9   12.22   10.11
  -1 -11   9    2.98    1.39
  -1 -11   9    5.25    2.94
  -1 -11   9    3.54    4.33
  -9   8  -3  242.48   19.16
   9  -8   3  221.65   27.80
  -2 -10  10   51.58    3.65
  -2 -10  10   53.97   11.82
  -9  -1   6  204.64   17.50
  -9  -1   6  206.40   19.00
  -5  -6  -4    3.67    3.30
  -5  -6  -4    2.95    2.90
   9   0   1  340.28   44.43
  -9   0  -1  295.63   20.80
   8  -3 -10  126.98   10.97
  -8   3  10  123.95    9.33
   8  -3 -10  115.78    8.59
   7 -11   5   61.71   10.68
   3 -11  10  307.76   25.69
   3 -11  10  301.11   24.92
  -5   0 -10   -0.51    3.85
   5   0  10   -5.50   10.59
   9  -9   0  243.96   24.74
   9  -9   0  313.15   30.91
  -8  -4   4  326.33   11.33
  -8  -4   4  347.97   23.13
   5 -12  -2  317.86   23.60
   5 -12  -2  291.70   20.01
  -2 -11   7   37.02   10.43
  -2 -11   7   34.97    3.66
  -8   2  -6    5.04    4.28
   8  -2   6   13.59   18.80
  -1  -1 -13   12.34    3.65
   1   1  13    7.74    8.05
   9  -3  -8   99.32   21.01
   9  -3  -8  100.36    7.32
  -8  10  -4   25.16    9.11
   8 -10   4    1.12    6.16
   0 -12   1 1913.42   18.92
   5  -7 -10   31.42    7.43
   8   3  -8   39.18    4.28
  -8  -3   8   50.76    5.44
  -8  -3   8   31.03    5.76
  -1   2 -14    4.38    2.14
   1  -2  14    8.29    5.45
   5  -8  -9   12.23    5.60
   0   2  13   56.28    8.19
   0  -2 -13   71.95   10.12
   2  -7 -10  227.36   18.97
  -2   7  10  181.04   15.73
   8  -9  -5  293.50   20.76
   8  -9  -5  263.95   18.05
   8  -9  -5  258.08   20.49
  -1 -10  11    4.31    2.66
  -1 -10  11   -0.82    2.35
  -1 -10  11    0.55    0.52
  -3  -7  -6    5.36    2.06
   4  -9  -8    1.39    2.92
   9  -8  -4  321.68   15.45
   9  -8  -4  278.75   23.82
  -8  -4   5  564.61   25.61
  -8  -4   5  586.03   28.18
   4  -3 -13  214.08   14.93
   9  -9  -1   53.41   14.09
   9  -9  -1   58.06   12.77
   3   2  11   -3.49    9.05
  -3  -2 -11    2.23    1.56
   3 -13   3   30.62    7.46
   3 -13   3   24.26    5.48
  -6   3 -10  141.12   11.91
   6  -3  10  172.80   29.80
   0 -11  10    1.96    1.99
   0 -11  10   -0.52    3.43
   0   5  11  122.06   16.58
   0   5  11  126.21   10.40
   0  -5 -11  148.89   12.43
   4   3 -14  371.41   16.00
  -4  -3  14  403.75   17.94
  -6  -5  11    2.84    3.12
  -1 -11  -1  117.65   10.20
  -1 -11  -1  108.84    9.45
  -1  -8  -7   16.54    5.25
  -1  -8  -7   11.06    4.52
  -4   2 -12    6.38    4.28
   4  -2  12    1.10    9.02
   9  -7   4    2.32   10.61
  -9   7  -4    4.35    3.29
  -8   5  -7   14.61    5.57
   8  -5   7    1.06   11.06
  -9   9  -1   94.15   16.18
   9  -9   1   91.68   17.14
   3 -13   4   44.01    7.73
   3 -13   4   43.71    5.35
   6 -12  -1  126.60   16.23
   6 -12  -1  117.23   10.23
  -8  -4   3    5.16    3.24
  -8  -4   3    8.31    5.68
  -8   6  -7  434.99   22.96
   8  -6   7  466.69   41.67
   6 -11  -4   46.22   10.40
   6 -11  -4   38.59    6.26
  -6  11   4   36.14    7.54
  -9   1   8   67.27    8.52
   9  -1  -8   75.04   10.11
   8 -10  -3  692.12   31.45
   8 -10  -3  630.85   30.98
  -1   6 -14  115.19   12.95
   1  -6  14  117.65   15.72
  -5  -4  13   56.87    7.40
   4   0 -14  439.01   21.10
   4   0 -14  413.46   20.08
  -4   0  14  398.38   18.18
  -4   0  14  442.08   19.60
   6 -12   5  106.28   11.94
   6 -12   5  130.28   17.45
  -2 -10  -2   34.54    3.79
  -2 -10  -2   33.94    8.66
  10  -4  -2   13.20   13.27
 -10   4   2    9.93    5.59
   5  -8  11   10.43    8.09
  -5   8 -11   15.12    3.92
  -3   9   8   94.95    7.29
   3  -9  -8  110.92   10.80
  -3   9 -12   92.72   12.27
   3  -9  12   91.70   10.47
   2  -8  13  137.40   21.95
  -2   8 -13  128.01   13.78
  -4  -2 -10  221.25   16.45
   4   2  10  199.71   31.01
  -3  -5  14  226.62   16.99
  -2   6  11    0.49    0.51
   2  -6 -11    1.10    2.40
  -7  -4  10    0.64    2.51
  -3  -8  12   38.81    6.36
  -7  10   5  215.96   16.95
   7 -10  -5  250.96   19.61
   7 -10  -5  246.63   17.23
   2  -1 -14  116.86   11.82
  -2   1  14  122.22   12.81
   2  -1 -14  113.11   11.93
  -4  -7  12   65.89   12.00
   6   1   8  135.68   31.61
  -6  -1  -8  121.30   14.04
   4 -13   3  244.80   18.20
   4 -13   3  278.87   22.63
  -2  -6  14   10.58    1.65
  -2  -6  14    8.27    3.08
   2   6 -14    5.50    1.85
  -5   2 -11  107.20   15.48
   5  -2  11  109.57   20.16
   2  -8  -9  108.55   17.62
  -2   8   9   93.10   11.57
  10  -4  -3   24.13   16.71
 -10   4   3   56.81   13.31
   3  -1 -14   94.54    9.41
   3  -1 -14   59.93    7.95
  -3   1  14   92.63    8.61
  -4  -6  -6   81.53   10.71
  -4  -6  -6   74.51   13.67
   6 -10  -6   94.00    6.89
   6 -10  -6  119.09   13.09
  -6  10   6   81.04    8.96
   1 -12  -1   34.26    7.26
   1 -12  -1   26.46    3.86
 -10   5   2  262.48   19.40
  10  -5  -2  306.65   36.97
   3 -13   2  542.44   26.21
   3 -13   2  606.72   27.92
   6   4   5   27.94   21.59
  -6  -4  -5   17.21    6.10
   7  -4 -11   61.52    7.08
   7  -4 -11   65.46   13.12
  -7  -3  -4  810.79   39.16
   7   3   4  802.55   58.72
   7   0   7   38.86   24.68
  -7   0  -7   18.10    4.49
   2 -12  -2   30.01    3.08
   2 -12  -2   32.68    9.08
   8   1 -10    2.92    1.06
  -8  -1  10    3.03    1.95
   8   1 -10    1.64    1.95
 -10   4   1 1428.52   63.60
  10  -4  -1 1457.62   77.32
  -4  -9   0   81.47    9.62
  -4  -9   0   73.51   16.50
  -9   3  -4  192.49   16.37
   9  -3   4  166.80   33.74
   4 -12   8   75.29   12.75
   4 -12   8  111.12   15.16
   4 -13   4  772.00   36.70
   4 -13   2    4.97    3.38
   4 -13   2   11.46    6.73
  10  -5  -1    0.57   11.32
 -10   5   1    4.05    2.78
  -2  -8  -6  126.71   10.63
  -2  -8  -6  143.00   14.19
   5 -12   7  280.36   21.44
   5 -12   7  245.56   20.76
  -8  -4   6  601.39   27.12
   8   4  -6  568.17   25.17
  -8  -4   6  615.59   29.02
   4 -11  -5    3.94    6.01
  -4  11   5   -0.23    1.69
   4 -11  -5    9.02    2.13
   3  -5 -12   -0.93    2.19
  -7  10  -7  299.50   23.26
   7 -10   7  269.31   22.69
   3 -13   5   57.88   11.83
   3 -13   5   57.43    9.52
   5  -6 -11  149.09   12.57
 -10   3   2  258.03   28.55
  10  -3  -2  197.51   27.92
  -1  -3 -12   59.11   11.66
   1   3  12   60.35   15.85
  10  -3  -3  264.59   38.55
 -10   3   3  205.75   18.19
   9  -4  -8  112.99   12.78
   9  -4  -8  127.66   19.74
   7  -5   9   13.25   12.39
  -7   5  -9   26.00    6.20
   9  -9  -2  431.56   23.12
   9  -9  -2  418.30   24.30
   7  -6   9   -0.50    8.63
  -7   6  -9    1.45    1.86
  -3  -7  13   -0.20    1.40
   8  -4   7  226.22   31.23
  -8   4  -7  295.78   21.87
   2 -13   4  297.03   22.52
   2 -13   4  278.87   23.36
  -7  -6   4   33.27    8.53
  -7  -6   4   43.14    6.78
  -6  -6  10  174.13   14.85
  -7  -6   5  570.24   26.81
  -7  -6   5  592.93   29.52
   5  -9  -8   12.04    5.50
   7  -7  -9  339.19   16.72
  -3   7 -13  130.57   16.76
   3  -7  13  139.30   14.62
 -10   5   3  298.82   25.74
  10  -5  -3  291.58   34.88
   0  -8  -8  570.19   26.31
  -4  -9   9   94.68    9.50
  -4  -9   9   96.31    7.22
  -6  -7   1  261.64   18.72
  -6  -7   1  264.09   21.51
  -7  -3  11   67.18   12.25
   2 -13   3   55.35    7.08
   2 -13   3   60.86   11.16
   7  -8  -8   74.01    9.58
   8  -7   7   11.05   11.61
  -8   7  -7   12.80    6.50
   0   0 -14  199.37   19.87
   0   0  14  224.61   18.64
   7 -11  -3   68.13   12.24
  -7  11   3   65.02   10.53
   7 -11  -3   66.23    9.97
   4  -8  12  214.74   18.04
  -4   8 -12  208.41   19.95
  -9   9  -2  115.27   11.18
   9  -9   2  134.34   20.18
  -6   8 -10   22.29    6.45
   6  -8  10   30.18   13.37
  -6  -4  12  130.28   11.18
   2   0  13  150.74   20.92
  -2   0 -13  116.21   12.47
   4  -5 -12   57.33   11.48
  -8  -4   2    1.83    1.70
  -8  -4   2    0.28    0.97
  -6  -7   8  110.12   15.42
  -6  -7   8   84.81    8.93
   6   0 -13   40.06    4.54
   6   0 -13   33.86    6.38
  -6   0  13   55.03    5.28
   6   0 -13   49.91    4.20
  -7   9  -8    1.84    3.22
   7  -9   8   -4.71    7.81
  -2  -2 -12    3.44    2.67
   2   2  12    3.30    8.07
  -5  -3  -8   58.89   10.09
   5   3   8   32.19   14.71
   6   1 -13    1.82    1.16
   6   1 -13    2.27    0.79
  -6  -1  13    1.88    1.83
  -4  -8  11   -1.51    2.86
   7   0 -12    2.00    1.32
   7   0 -12    1.97    1.06
  -7   0  12    2.75    1.81
  -2 -11   1  270.84   20.24
  -2 -11   1  264.63   21.19
  -5  -8   0  110.90   11.62
  -5  -8   0  109.55   14.52
  -3   2 -13  306.98   21.51
   3  -2  13  296.12   27.78
  10  -4  -4   -1.64   10.47
 -10   4   4    1.68    1.70
   3 -11  -5  151.65   14.60
  -3  11   5  137.07   10.84
   3 -11  -5  142.83   10.81
  -4  -6  13  116.60   13.55
   0 -10  -5   14.46    3.30
   0 -10  -5    4.01    3.27
  -5  -4  -7   25.22    5.39
   5   4   7   19.73   17.38
   2 -13   5    1.85    4.17
   2 -13   5   -0.50    2.64
  -1   3  13   90.67    7.38
   1  -3 -13   99.58   12.14
  -1   3  13   88.08    8.27
  -9  -1   0    4.55    3.32
  10  -3  -1   -4.74   14.08
 -10   3   1    3.32    3.35
   7  -1 -12   78.58    8.07
   7  -1 -12   69.32    5.47
   7  -1 -12   56.26    5.72
  -7   1  12   78.66    6.40
  -3 -10   0  202.87   18.52
  -3 -10   0  204.79   16.13
   0   7 -14  141.05   16.31
   0  -7  14  161.12   14.60
   0  -7  14  133.34    9.89
 -10   3   4    0.50    1.40
  10  -3  -4   19.20   20.88
   9  -7  -6    1.53    4.10
   9  -7  -6   -0.49    5.08
   9  -7  -6    3.77    1.16
  -1 -12   4  562.08   26.17
  -1 -12   4  561.98   34.54
  -7  -6   3  412.26   19.99
  -7  -6   3  426.13   22.41
  -9  -1   7  111.33   13.62
  -9  -1   7  112.10   10.20
  10  -5   0   29.50   22.72
 -10   5   0   15.46    5.77
  -8  -3  -1  353.88   27.89
  -8  -3  -1  342.46   20.41
   8  -9   6   -2.35    8.58
  -8   9  -6    0.38    1.89
   2 -12   9  203.02   21.72
   2 -12   9  194.27   18.01
  -7  -6   6  185.40   20.11
  -7  -6   6  211.08   16.12
   7   6  -6  199.06   15.02
  -1 -12   5   19.15    5.61
  -1 -12   5   21.38    5.43
   8  -4 -10   90.56    8.41
   8  -4 -10   78.65    5.80
   8  -4 -10   85.90   13.42
  -7  -5   9   62.05    6.49
  -7  -5   9   70.57    7.50
  -5  -8   9    1.43    0.76
  -5  -8   9    0.28    2.83
  -5  10 -10  292.18   23.13
   5 -10  10  290.21   26.68
   9  -6  -7  201.19   15.90
   9  -6  -7  232.68   21.98
   9  -6  -7  206.51   19.37
   4 -13   5    5.39    6.93
   4 -13   5    4.35    3.19
  10  -6  -1   -2.79   10.35
 -10   6   1    0.84    2.86
   4 -13   1   26.08    7.84
   4 -13   1   23.15    4.84
  -2 -11   8   15.78    5.19
  -2 -11   8   10.63    2.92
 -10   4   0  104.02   10.85
  10  -4   0  102.35   29.85
  -5  11   5    5.56    3.50
   5 -11  -5   12.34    3.18
   5 -11  -5    4.11    5.27
  -9   0   8  879.00   41.27
   9   0  -8  970.42   41.93
   9   0  -8  930.29   42.69
  10  -6  -2   24.48   16.10
 -10   6   2   33.44    6.01
  -7   4  -9  183.97   13.20
   7  -4   9  172.22   23.88
   0 -12   8  400.93   19.92
   0 -12   8  363.58   22.89
   3 -13   1   30.11    6.04
   3 -13   1   31.48    7.89
   1  -1 -14    7.72    5.51
  -1   1  14    2.75    1.93
   1  -1 -14    5.31    2.33
  -4  -4  14   69.67    7.77
  -3  -9  11   38.86    6.99
  -3  -9  11   26.73    2.47
  -3  -9  11   32.96    1.38
   8   1   4    3.07   13.81
  -8  -1  -4   19.18    5.21
  -7   7  -9   41.97    7.55
   7  -7   9   32.21   16.78
   1 -11  -4    2.15    1.29
   1 -11  -4    2.11    2.72
   8  -7  -8    0.95    0.36
   8  -7  -8    1.19    1.53
   8  -7  -8    3.38    5.40
   2 -13   2    5.21    3.57
   2 -13   2    4.38    2.66
  -2  -9  12   65.20    5.95
  -2  -9  12   68.40    5.38
  -2  -9  12   68.08    8.79
  -9  -2   4   31.17    6.26
  -9  -2   4   26.50    6.00
   8   0   5    8.15   18.51
  -8   0  -5    4.69    3.37
   8 -11   1  660.08   34.48
   8 -11   1  589.09   32.93
  -6  -6  -2   48.68    5.18
  -6  -6  -2   50.10   11.71
   4 -12  -3  152.94   13.86
   4 -12  -3  125.82   10.35
   2  -4  14   11.34    7.75
  -2   4 -14   20.77    6.35
   5 -11   9   62.38   13.50
  -5  11  -9   48.73   13.65
   0 -11  -3  196.08   20.77
   0 -11  -3  181.33   16.02
  -3 -10   9    2.02    0.94
  -3 -10   9    4.91    2.62
  -3 -10   9    3.51    1.65
   0  -4 -12   24.99    7.46
   0   4  12   14.17   10.30
   0   4  12   19.32    2.04
   2  -5 -12   40.15    6.94
  -2   5  12   26.24    5.41
  -2  -8  13    4.62    4.00
  -2  -8  13    3.26    0.74
   1  -1  14  332.95   14.92
  -1   1 -14  366.53   21.73
  -5  -6  12   77.30    7.93
   1 -10  12    2.82    3.86
   1 -10  12    0.76    2.96
   7  -6 -10    2.83    3.15
   6  -1 -13  109.14    9.17
  -6   1  13   84.68    5.29
  -6   1  13  103.47    8.28
   6  -1 -13  115.50    8.46
  -2   5 -14  154.45   14.23
   2  -5  14  180.75   14.99
   1   7 -14   19.77    5.71
  -1  -7  14   17.55    6.05
  -1  -7  14   15.26    3.38
   0 -12   0   20.83    3.54
   0 -12   0   22.55    5.74
   4  -1 -14   79.01    6.63
  -4   1  14   82.02    3.08
   4  -1 -14   51.02    8.20
  -9  -2   3  136.93   11.23
  -9  -2   3  147.31   12.90
   7   1 -12   37.48    1.91
   7   1 -12   40.17    2.22
  -7  -1  12   34.90    4.54
 -10   5   4    2.30    3.28
  10  -5  -4   17.87   19.92
  -1 -10  -4   27.56    7.89
  -1 -10  -4   25.64    7.51
  10  -2  -3   96.26   23.48
 -10   2   3   76.84   13.05
   9  -8   4  111.97   29.17
  -9   8  -4   97.28   14.97
  -1 -12   3   44.85   10.74
  -1 -12   3   56.39   12.52
   6  -4 -12   40.18    6.63
   8 -11   0    1.90    3.22
   8 -11   0    1.70    8.00
   8  -8  -7    1.86    0.75
   8  -8  -7    3.62    5.75
   8  -8  -7   -0.05    0.73
   2  -9  -8    0.67    5.23
  -2   9   8    0.59    0.51
   3 -13   6  157.75   14.57
   3 -13   6  145.08   11.10
   8 -11   2    2.80    4.21
   8 -11   2    3.68    8.05
   7  -9  -7    5.71    6.16
   8 -10   5    9.82    9.57
  -8  10  -5   19.42    7.29
   7 -12   2   33.79    8.99
   7 -12   2   18.18    8.32
   5 -13   3   -0.66    1.87
   5 -13   3    4.65    5.59
  -4  -8  -3    3.14    2.43
  -4  -8  -3    2.45    3.47
  -9  -2   5   34.98   12.55
  -9  -2   5   54.47    8.50
   9  -1   3  522.96   46.49
  -9   1  -3  559.36   29.30
   3 -12   9   18.50    5.00
   3 -12   9    4.39    7.25
 -10   6   0  355.76   19.82
  10  -6   0  410.98   36.96
  -1 -12   6   35.01   10.51
  -1 -12   6   25.07    8.11
   5   2   9    3.73   11.53
  -5  -2  -9    2.59    2.66
  -6  -2  13    3.86    2.66
   4 -10  -7   20.37    7.11
   4 -10  -7    7.76    2.77
   8   4  -7  460.51   22.18
  -8  -4   7  479.12   24.23
  -8  -4   7  474.10   22.83
  10  -2  -2  211.22   37.27
 -10   2   2  160.56   12.92
   7 -12   1   -0.98    6.59
   7 -12   1    2.27    2.37
   6 -12  -2   85.73    5.11
   6 -12  -2   87.52   10.35
   1 -12   9   17.97    6.64
   1 -12   9   18.99    9.05
   5 -13   2  804.32   39.60
   5 -13   2  771.87   39.54
   5  -3 -13   39.69    5.87
   5  -3 -13   47.30    8.37
  -5   3  13   48.40    6.02
   1 -10  -6  231.21   18.16
   1 -10  -6  235.89   19.42
   7 -11   6   31.72   11.44
  -7  11  -6   39.77   13.77
  10  -6  -3  136.50   23.04
 -10   6   3  108.44   14.28
   3 -12  -3   89.18   19.26
   3 -12  -3   86.80    3.59
   9  -9  -3   10.49    4.02
   9  -9  -3   24.22   11.87
  -5  -7  11   38.02    6.02
   9  -5   5  148.56   28.16
  -9   5  -5  182.57   16.75
   6  -2  10 1021.23   57.38
  -6   2 -10  868.69   44.32
   4 -10  11  159.51   13.78
  -4  10 -11  159.41   18.22
   4 -11  10   -1.77    5.00
  -7  -5  -1   32.31    7.73
  -7  -5  -1   32.69    8.78
  -1   7 -14    3.36    2.63
   1  -7  14    1.06    2.99
   9  -6   5   24.75   18.16
  -9   6  -5   32.89    7.03
   6 -12   6  210.22   23.88
   6 -12   6  210.84   21.50
   6 -10   9   53.57   15.67
  -6  10  -9   45.59   15.06
   6  -8  -9   31.54    7.91
   9  -8  -5  377.98   18.47
   9  -8  -5  360.95   21.08
   9  -8  -5  414.25   23.55
  -6   0  -9   13.90    4.35
   6   0   9   42.07   18.45
   7  -2 -12    7.47    3.01
   7  -2 -12   18.40    3.63
   7  -2 -12   15.98    1.94
  -7   2  12   12.73    3.79
  10  -2  -4  124.09   33.38
 -10   2   4   93.79    9.55
   2 -13   6  132.32   13.50
   2 -13   6  132.28   13.26
   8  -6  -9    5.53    3.46
   8  -6  -9   32.37    8.50
  -9   0  -2  275.40   23.94
   9   0   2  264.78   43.33
  -3  -9  -3  740.32   35.95
  -3  -9  -3  702.32   34.26
   5   5   6   24.85   19.40
  -5  -5  -6    8.02    3.81
  -8   3  -7   71.88    8.95
   8  -3   7   61.80   25.34
  -2   3 -14   81.81    9.31
   2  -3  14   98.00   13.63
   6  -7 -10    7.05    5.20
   0 -10  12   66.49    6.53
   0 -10  12   56.22    8.09
   0 -10  12   75.04    6.36
   2 -10  12    1.39    4.86
 -10   3   0  102.56    8.61
  10  -3   0  120.75   31.91
  -9   9  -3  148.74   12.69
   9  -9   3  145.46   20.01
  -6  -5  -4    0.55    1.86
  -6  -5  -4   -1.82    2.59
   8 -10  -4   64.21   10.37
   8 -10  -4   55.80    8.76
  -8  10   4   42.81   10.93
  -1   7  10   13.00    9.16
   1  -7 -10   26.26    7.04
  -1   7  10   17.14    2.59
   5 -13   4   83.50    9.99
   5 -13   4   80.27   12.34
  -7  -4  -3  162.34   16.10
  -7  -4  -3  144.56   16.16
   8   3  -9   17.59    1.50
  -8  -3   9   15.07    3.37
   5 -12  -3   36.43   11.24
  -5  12   3   11.91    5.84
   5 -12  -3   37.29    7.76
  -7  -6   2  136.43    7.59
  -7  -6   2  132.66   12.79
   7  -1   8    5.21   14.65
  -7   1  -8    6.22    3.60
   7 -12   3   55.49   15.12
   7 -12   3   58.31   15.22
  10  -3  -5   -3.97   10.38
 -10   3   5    0.39    1.92
   1  -9  13    4.40    3.56
  -1   9 -13    2.20    1.51
  -8  -2  -3   17.58    5.12
   8   2   3    4.14   14.38
   9  -5  -8  159.62   13.89
   9  -5  -8  155.55   19.88
   9  -5  -8  125.38    8.51
  -8  -4   1    9.17    3.48
  -8  -4   1   17.79    3.21
  10  -4  -5  644.55   39.47
 -10   4   5  673.56   33.70
  -8   8  -7   54.89   10.57
   8  -8   7   49.70   17.31
  -9  -2   2    9.98    2.96
  -9  -2   2   10.61    4.60
  -7  -6   7  145.17   11.72
   7   6  -7  123.69    9.45
  -7  -6   7  141.20    8.73
  -3  10   7   95.90    7.68
   3 -10  -7  116.62   11.92
   3 -10  -7  101.10    7.12
   0  -9  13   55.32    9.96
   0  -9  13   60.54    5.45
   0  -9  13   43.28    7.45
   5  -5 -12   75.86    8.12
   6 -11   8  466.45   27.57
  -6  11  -8  463.19   28.67
  -4   1 -12   59.56    5.66
   4  -1  12   80.51   19.43
  -8   1  -6   95.76    8.43
   8  -1   6   81.12   22.25
   2  -6  14  251.81   22.08
  -2   6 -14  207.07   16.39
  -4  -1 -11    8.43    3.99
   4   1  11    2.54   13.94
   1 -11  11  107.56   11.38
   1 -11  11  166.93   13.73
 -10   5  -1   67.10    6.25
  10  -5   1   64.45   21.84
   7 -12   0  457.71   26.12
   7 -12   0  390.36   19.81
   8 -11  -1  261.06   21.53
   8 -11  -1  227.49   23.06
   9  -2   4  230.82   41.47
  -9   2  -4  260.19   21.89
  -1 -11  10   64.86    7.45
  -1 -11  10   46.09    6.18
  -1 -11  10   50.26    7.42
   1  -6 -11  177.68   12.54
  -1   6  11  185.50   10.61
  -1   6  11  179.03   15.90
   5 -13   1   64.36    5.56
   5 -13   1   49.66   12.20
   8   2 -10   16.33    2.99
  -8  -2  10   17.30    4.33
   8   2 -10   12.78    2.03
   5   1 -14    8.66    2.64
  -5  -1  14    0.37    2.18
  -5  -1  14    8.35    3.04
  -3  -8  -5   78.63   16.81
  -3  -8  -5   86.21    8.14
   2 -11  11    1.60    1.81
   2 -11  11    1.46    4.34
  10  -2  -1   33.31   21.81
 -10   2   1   32.59    8.32
  -1  -9  -6  187.68   14.52
  -1  -9  -6  189.45   13.58
  -5  10   7  311.53   24.35
   5 -10  -7  308.96   26.17
  -1  -3  15    0.62    2.27
   1   3 -15   -0.56    1.38
   1 -13   4   26.61    8.76
   1 -13   4   27.79    9.51
   8 -11   3  114.24   13.85
   8 -11   3  120.12   16.83
   2 -13   1   67.82   18.46
   2 -13   1   69.15    5.89
   9  -4   5   12.44   15.48
  -9   4  -5   30.56    8.17
  -4  -7  -5  165.75   11.68
  -4  -7  -5  182.64   17.34
   4 -13   6  194.94   21.66
   4 -13   6  225.05   21.07
  -2  -3  15  115.58   14.79
  -2  -3  15   85.77    7.10
   2   3 -15   94.82   10.10
   4 -13   0    5.70    3.05
   4 -13   0    5.57    6.61
   3   1  12   55.47   16.92
  -3  -1 -12   64.14    7.54
  -1 -12   2  106.35    9.14
  -1 -12   2   98.33   14.96
  -9  -2   6  139.04   10.65
  -9  -2   6  152.91   10.25
  -5   9 -11  136.01    7.95
   5  -9  11  105.77   12.68
  -9   2   9  383.36   19.30
   2 -11  -5   31.38    7.48
  -2  11   5   24.89    4.77
   2 -11  -5   32.37    9.28
  10  -4   1    6.72   13.42
 -10   4  -1   46.73    7.93
  -3  -6  14   49.09    7.79
  -5  -5  13   83.77   11.49
  -4 -10   5   75.98   13.55
  -4 -10   5   63.52    7.90
  -5  -7  -3  119.26   10.46
  -5  -7  -3  118.93    9.89
  -9   7  -5  194.98   17.97
   9  -7   5  231.67   33.47
   6  -9  -8  129.84   12.13
  -1  -4  15  157.95   12.67
   1   4 -15  172.32   10.73
  -1  -4  15  140.40    9.83
   7  -3   9  100.87   20.46
  -7   3  -9  116.24   16.07
  -5  -2  14    0.07    1.41
   5   2 -14    0.43    0.52
   5   2 -14    1.01    0.58
   2   2 -15  782.19   37.68
  -2  -2  15  749.43   38.38
   1 -13   5   24.87    8.32
   1 -13   5   31.60   10.46
   0  -9  -7  439.79   22.43
   0  -9  -7  406.40   20.79
  10  -7  -1   -1.22    8.35
 -10   7   1    4.05    4.72
   8  -1 -11  221.91   17.54
   8  -1 -11  212.96   16.66
  -8   1  11  226.37   18.59
   5  -1  11   96.22   18.69
  -5   1 -11   98.17   10.18
  -6  -7   0   41.52    8.48
  -6  -7   0   32.47    7.33
 -10   6  -1   82.78    8.32
  10  -6   1   49.96   20.93
   8  -9  -6   33.20    6.32
   8  -9  -6   28.97    8.23
   8  -9  -6   51.58   11.80
   3 -13   0   75.48    7.57
   3 -13   0   67.60   15.30
   1 -13   3   11.29    5.24
   1 -13   3   12.93    4.19
   3  -8  13   84.28    9.29
  -3   8 -13   95.76    8.44
  -1   8   9  388.35   26.02
   1  -8  -9  400.64   20.71
  -1   8   9  380.04   18.01
  -5  -9   5   34.88    9.73
  -5  -9   5   41.48   11.04
   7  -8   9   18.63   12.42
  -7   8  -9   29.94    8.05
  -4 -10   4  384.27   20.02
  -4 -10   4  370.49   18.86
   3  -2 -14   16.29    3.62
   3  -2 -14    9.90    5.17
  -3   2  14   12.70    2.52
  -1 -11  -2   74.84   15.79
  -1 -11  -2   79.11    7.70
  -1 -12   7   21.36    6.38
  -1 -12   7   24.85    6.74
   5   0 -14  182.60   10.96
  -5   0  14  145.04    9.96
  -5   0  14  127.68    9.00
   5   0 -14  139.88    9.06
  10  -2  -5  187.85   25.63
 -10   2   5  160.67   12.27
   3  -4 -13  165.55   10.83
  -3   4  13  162.46    9.20
   6  -2 -13    1.59    1.31
  -6   2  13    0.16    0.31
   6  -2 -13    2.20    1.61
  10  -6  -4    7.15    7.25
  10  -6  -4   30.40   13.21
  -7  -2  12   42.97   10.49
  -2 -10  11  326.19    6.11
  -2 -10  11  316.69   24.53
  -2 -10  11  365.71   24.94
  -2  -5 -10  140.68   15.40
   2   5  10  142.55   26.37
  -6  -7   9   41.64   11.56
  -5   5 -12   18.55    6.37
   5  -5  12    9.02   12.59
 -10   7   2   23.61    8.67
  10  -7  -2   26.67   15.68
  -2  -6  -9   42.03    8.49
   2   6   9    5.32    9.42
  -5  -9   4    2.41    1.66
  -5  -9   4    8.54    4.24
  10  -5  -5    1.16    5.60
  10  -5  -5    0.71    7.92
   9  -1  -9   94.41   10.74
   9  -1  -9   52.28    7.86
  -9   1   9   83.35    4.50
   9  -3  -9   -1.05    3.01
  -1  -2  15    0.79    1.77
   1   2 -15    2.01    1.52
  -4  -9  -1  208.52   20.33
  -4  -9  -1  200.90   17.22
   3   5   9   -4.62   11.16
  -3  -5  -9    0.07    1.59
   1 -12  -2  190.11   10.19
   1 -12  -2  186.40   12.73
  -2 -11   0   45.92   12.23
  -2 -11   0   57.61    8.84
  -4 -10   6   24.82    7.37
  -4 -10   6   36.44   10.45
   6  -6 -11   63.27   12.39
   2  -2 -14   61.95   10.39
  -2   2  14   59.18    8.18
   2  -2 -14   80.24    9.69
  10  -7   0  271.33   30.71
 -10   7   0  269.71   25.22
   8  -2 -11   -0.01    0.71
   8  -2 -11    2.08    3.07
  -8   2  11    0.65    0.97
   8  -2 -11   -0.18    0.73
  -2  -4  15   47.41    8.20
  -2  -4  15   31.17    7.44
   2   4 -15   45.48    8.93
  -2  -7  14  443.11   23.87
  -2  -7  14  358.51   17.26
   5  -6  12  729.09   40.36
  -5   6 -12  665.47   33.17
   5 -13   5  137.97   10.63
   5 -13   5  125.79   14.49
  -9  -1  -1    0.92    1.52
   9   1   1  -16.24   17.14
  -6   9 -10  130.27   11.53
   6  -9  10  117.76   15.95
   8   0 -11   -0.20    0.50
   8   0 -11   -0.48    1.22
  -8   0  11   -0.96    1.90
   7 -12   4  495.05   26.29
   7 -12   4  521.81   30.14
   6 -11  -5   49.26    9.38
   6 -11  -5   61.70   11.31
  -6  11   5   44.34    9.07
  -5  -9   6  153.63   10.99
  -5  -9   6  147.01   15.21
   7  -5 -11   41.01   10.76
   3  -1  13   10.03   11.17
  -3   1 -13    3.05    3.17
   5 -12   8  103.18   14.82
   5 -12   8   95.53   15.03
  -9  -1   8   37.24   14.07
   9   1  -8   33.42    7.24
  -9  -1   8   39.81    7.97
   7 -11  -4  174.65   15.20
   7 -11  -4  152.81   13.41
  -7  11   4  139.68   13.03
  -6  -3  13    6.86    2.72
   2  -9  13   -0.02    3.94
  -2   9 -13   -0.84    1.60
   4  -4 -13   32.11    8.43
   3 -13   7  108.89   13.73
   3 -13   7  158.64   15.41
  -4  -9  10   24.65    4.26
  -4  -9  10   29.50    7.36
  -4  -9  10   15.56    3.39
  10  -1  -3  285.38   61.86
 -10   1   3  248.08   23.26
   1   2  13  126.02   19.42
  -1  -2 -13   95.85    8.20
  -2   2 -14   52.17    9.24
   2  -2  14   54.92   14.24
   3   4  10   -6.58   10.84
  -3  -4 -10    1.13    1.61
  -2 -11   9   70.62    3.90
  -2 -11   9   48.57    8.58
  -2 -11   9   70.92    6.07
  -4  -5  14   -0.02    3.01
  -9  -2   1  282.31   25.99
  -9  -2   1  324.28   20.30
   4  -9  12   63.95    7.98
  -4   9 -12   60.60    5.06
   2 -13   7  379.17   30.16
   2 -13   7  363.97   20.39
   0 -11  11   17.82    4.30
   0 -11  11    6.69    2.16
   0 -11  11    9.12    4.85
  -5  -1 -10  286.73   25.47
   5   1  10  294.85   35.86
   2 -12  -3   42.13    9.17
   2 -12  -3   32.18    8.90
   9 -10   0   59.50   10.06
   9 -10   0   63.87   14.24
   7 -12  -1   75.38   12.06
   7 -12  -1   58.06   11.59
  -4   5 -13   42.80    7.72
   4  -5  13   38.40   11.00
   1 -13   6   -0.80    3.59
   1 -13   6   -0.19    3.12
  -4 -10   3   10.29    4.90
  -4 -10   3   14.80    4.61
   0   4 -15   22.82    7.20
   0  -4  15   24.40    9.16
   4 -12   9  366.59   21.16
   4 -12   9  381.28   25.57
   5  -4  12  152.32   18.17
  -5   4 -12  151.90   13.22
  -1  -9  13  212.55   20.59
  -1  -9  13  189.47    6.99
  -1  -9  13  194.00   15.63
   8  -5 -10   13.53    5.00
   8  -5 -10   26.15    7.11
   7  -3 -12    0.23    0.60
  -7   3  12    0.63    0.60
   7  -3 -12   -0.91    1.63
  -2 -10  -3  144.03   13.17
  -2 -10  -3  148.98   11.44
  -8  -4   8    2.84    1.61
   8   4  -8    8.77    1.73
  -8  -4   8    9.61    4.01
  -1   5  12  183.38   13.63
  -1   5  12  185.60   11.11
   1  -5 -12  207.79   16.66
   5 -13   0   -0.31    4.67
   5 -13   0   19.19    3.23
   3   6   8    1.38   10.07
  -3  -6  -8    6.40    3.77
  -2  -9  -5  392.70   21.35
  -2  -9  -5  372.40   18.32
 -10   1   4   44.35    8.14
   7 -10  -6  179.72   15.22
   7 -10  -6  156.45    9.65
  -5  -8  -1   50.41    8.57
  -5  -8  -1   40.99    9.71
   0  -1 -14   35.00    7.10
   0   1  14   29.39    7.90
   1 -13   2  395.39   20.31
   1 -13   2  417.82   26.04
   9 -10   1  303.28   27.61
   9 -10   1  243.51   24.30
   0 -12   9  196.28   17.21
   0 -12   9  189.29   13.10
  -2   4  13   74.96    3.21
  -2   4  13   75.97    7.97
   2  -4 -13   80.80   13.09
  -2  -1  15  176.90   15.58
   2   1 -15  163.25   11.24
   0   3 -15    0.78    1.55
   0  -3  15    2.31    2.85
   9  -9  -4    1.73    3.89
   9  -9  -4   31.09   12.10
  -3  -2  15    9.94    2.68
  -3  -2  15    2.50    1.97
   3   2 -15    4.39    1.99
   1   5 -15  151.96    9.72
  -1  -5  15  155.88    9.47
  -1  -5  15  160.23   13.37
  -5  -9   3  120.88   13.56
  -5  -9   3  115.21   12.68
   8 -11  -2   89.90    5.99
   8 -11  -2   74.33   24.78
  10  -3   1   27.78   18.37
 -10   3  -1   41.56    9.43
  -7  -4  11    0.69    1.65
  10  -2   0   83.84   25.43
 -10   2   0   93.28    9.48
  10  -7  -3  222.00   26.41
  10  -7  -3  163.07   15.61
  -3 -10  -1   65.95    8.21
  -3 -10  -1   63.77   12.92
   3 -11  11   -0.66    3.85
  10  -1  -2    2.18   15.74
 -10   1   2    1.39    1.37
  -1  -6 -10   14.21    4.61
   1   6  10   21.58   15.93
  -5  -3  14  114.05   12.64
  -7  -6   1   10.64    3.71
  -7  -6   1    8.35    3.13
   4  -2 -14  195.03   15.79
   4  -2 -14  189.59    8.80
  -4   2  14  205.06   16.31
  10  -3  -6   20.46   12.41
  -3 -11   5   28.23    8.08
  -3 -11   5   34.91    7.92
   6  -5  11  279.81   32.35
  -6   5 -11  245.88   22.81
  -6   6 -11  122.47   18.34
   6  -6  11  147.88   20.95
  -2  -4 -11  441.10   21.94
   2   4  11  380.16   29.50
  -3  -3  15   85.23   11.52
   3   3 -15   77.56    4.10
  -4   6 -13   34.82    7.40
   4  -6  13   34.47   10.88
   7   6  -8    2.29    1.51
  -7  -6   8    5.49    4.11
  -7  -6   8    3.10    1.30
  -1 -10  12   18.73    5.78
  -1 -10  12   16.45    3.17
  -1 -10  12   14.12    1.43
  -5  -8  10  119.18   10.16
   0   3  13   48.34   10.73
   0  -3 -13   66.46    5.54
   8 -11   4  534.50   29.90
   9 -10  -1    3.85    6.04
   9 -10  -1   -0.33    3.54
   3 -10  12   90.86    9.64
  -3  10 -12   89.20   13.77
  -2  -7  -8    2.41    2.61
   2   7   8    9.01   15.28
   4  -4  13  161.32   17.66
  -4   4 -13  143.39   10.25
   2  -7  14  374.24   24.02
  -2   7 -14  375.82   19.15
  -5  -6  -5   32.38    8.14
  -5  -6  -5   24.61    6.90
   1   0  14  932.96   47.36
  -1   0 -14  796.76   38.91
  -9   3  -5   53.56    9.66
   9  -3   5   45.40   27.93
  -3 -11   4  281.19   22.35
  -3 -11   4  301.93   26.90
  10  -7   1   15.05   14.87
 -10   7  -1   12.24    5.16
  -8  -3  -2  309.60   26.33
  -8  -3  -2  295.89   23.69
   0 -12  -1   59.59   10.62
   0 -12  -1   63.83    7.49
  -2  10   7   18.21    4.14
   2 -10  -7   22.67    7.39
   2 -10  -7   27.32    7.46
  -4 -10   7  167.58   11.68
  -4 -10   7  178.05   12.18
  -6  -5  12    2.83    3.63
  -6  -6  11    1.25    3.25
   7 -10   8    0.04    6.30
  -7  10  -8    9.28    6.47
  10  -4  -6  150.61   14.61
  10  -4  -6  126.32   17.35
  -7  -5  10  611.45   33.03
   7   2   6   64.39   22.64
  -7  -2  -6   25.57    6.34
   5  -1 -14    4.52    2.77
  -5   1  14    1.42    0.92
   5  -1 -14   12.41    2.97
  -5   7 -12   73.78    7.01
   5  -7  12   96.15   15.35
  -9   9  -4    6.65    7.08
   9  -9   4   10.67   12.17
  -9  -2   7  392.23   19.51
  -9  -2   7  403.51   20.42
   0  -8  14  185.61   14.79
   0  -8  14  176.49   11.22
   0   8 -14  170.72   15.91
  10  -5   2   89.74   30.27
 -10   5  -2   68.66    9.67
  -9   0   9   11.39    6.27
   9   0  -9   14.67    6.58
   9   0  -9    4.38    1.60
  -3 -10  10   63.74    5.21
  -3 -10  10   68.15    6.01
  -3 -10  10   42.52    6.39
  -5  -9   7  175.03   14.98
   5   9  -7  160.02   10.02
  -5  -9   7  150.15   10.86
   9  -4  -9   41.17    6.04
   9  -4  -9   51.57    9.51
   9  -4  -9   62.96   16.04
   0   5 -15    0.55    1.63
   0  -5  15    2.00    3.13
   6 -12  -3    7.46    7.16
   6 -12  -3    6.65    2.58
  -6  12   3    1.52    2.95
  -8  -4   0   51.73   10.29
  -8  -4   0   65.40    9.37
   9  -7  -7  158.00    9.26
   9  -7  -7  186.72   14.46
   9  -7  -7  189.10   12.34
  -1 -12   1   76.55   11.99
  -1 -12   1   82.60    6.39
  -1  -7  -9  512.43   26.76
   1   7   9  519.60   40.77
  -2  -1 -13 1016.66   50.05
   2   1  13 1080.58   23.70
  -8   3  11    7.82    2.93
   8  -3 -11   13.81    4.45
   8  -3 -11    3.10    1.91
  -3 -11   6   -1.38    2.66
  -3 -11   6    0.05    1.22
  -8   2  -7  346.78   23.34
   8  -2   7  287.50   35.69
   2 -13   0   -0.13    1.83
   2 -13   0   -1.70    3.51
   9  -8   5  255.02   29.26
  -9   8  -5  195.88   17.65
   1   5  11  127.78   20.86
  -1  -5 -11  132.69   11.60
  -3  -1  15  119.56    9.63
   3   1 -15  128.02    9.35
  -6  -8   5    2.97    3.05
  -6  -8   5    1.01    1.41
  -1  -1  15  286.41   26.13
   1   1 -15  283.12   22.63
   8   1 -11  105.35    7.96
  -8  -1  11   97.36    7.93
 -10   1   5  109.88   12.20
 -10   1   5  108.66   11.17
   9 -10   2   26.23   12.96
 -10   2   6   37.89    8.35
   8 -10   6  456.55   28.12
  -8  10  -6  478.73   25.70
   6 -12   7  148.61   17.12
   6 -12   7  153.96   19.55
   8  -6   8   70.10   18.67
  -8   6  -8   76.22    7.68
  -4  -4  -9   10.82    5.02
   4   4   9   21.78   21.66
  10  -6   2   26.86   17.98
 -10   6  -2   46.36    9.71
   6 -13   2  350.20   18.27
   6 -13   2  345.51   23.91
  -7  -1  -7    8.28    3.53
   7   1   7   13.37   16.85
   1  -9  -8  156.98   11.59
  -1   9   8  142.95    8.69
  -6  -8   4  174.67   12.99
  -6  -8   4  156.32   13.20
   6 -10  -7   56.74   13.19
   4  -8 -10   -0.40    2.95
  -2  -5  15  439.40   30.64
   2   5 -15  393.40   19.11
  -2  -5  15  426.05   20.29
   4 -13   7  106.58   15.23
   4 -13   7  101.83   14.02
   2 -12  10  247.92   22.02
   2 -12  10  211.76   19.37
   4 -13  -1  173.61   13.88
   4 -13  -1  169.47   10.39
  -6  -3  -7   56.27    8.86
   6   3   7   59.72   25.11
   6 -13   3  179.26   16.83
   6 -13   3  162.34   18.62
  -8   9  -7  191.37   16.79
   8  -9   7  134.42   16.92
   8  -5   8  323.59   29.46
  -8   5  -8  282.53   23.02
   4   5   8   70.90   29.05
  -4  -5  -8   81.33    5.98
  -1 -12   8   41.43    7.75
  -1 -12   8   44.52   10.87
   0   2 -15  233.67   18.97
   0  -2  15  220.88   21.91
  10  -6  -5   55.22   15.41
  10  -6  -5   79.39   13.56
  -6   4 -11   57.27   18.48
   6  -4  11   32.50   17.10
  -6   7 -11    3.89    4.12
   6  -7  11    5.61    7.41
   1  -8  14  137.92   11.34
  -1   8 -14  130.40   16.43
   1  -2 -14   18.56    4.58
  -1   2  14   20.75    5.45
   4  -7 -11  281.58   22.26
   7 -11   7   -0.37    5.87
  -7  11  -7    5.46    5.26
  10  -4   2   16.66   14.34
 -10   4  -2   13.57    5.39
  -7  -3  -5   -0.23    3.42
   7   3   5   -6.31   18.82
  -6  -8   6  396.96   22.58
  -6  -8   6  406.33   20.12
 -10   1   1   34.50    7.63
  10  -1  -1   30.54   23.49
   6  -1  10   19.84   15.08
  -6   1 -10    3.99    3.01
   9  -6  -8    0.91    3.69
   9  -6  -8    1.21    0.57
   9  -6  -8    1.17    3.60
  -3 -11   3  151.54   16.14
  -3 -11   3  154.66   13.97
   9  -8  -6   33.51    5.71
   9  -8  -6   27.08    8.86
   9  -8  -6   33.32   10.14
   5 -13   6   18.58    6.45
   5 -13   6   17.86    9.11
   4 -11  -6  355.14   20.39
   4 -11  -6  280.22   21.64
  -4  11   6  255.43   20.04
   4 -12  -4    4.86    3.94
   4 -12  -4   18.01    3.40
  -4  12   4   10.17    4.66
  -3  -3 -11   42.29    7.77
   3   3  11   15.13    9.58
   7 -12   5  105.56   15.85
   7 -12   5  102.31   19.55
  -4 -10   2   46.26   12.00
  -4 -10   2   40.00    7.88
  -3  -4  15   55.74    7.28
   3   4 -15   42.27    8.70
  -3  -4  15   59.17    5.67
   6   2   8    3.18   13.14
  -6  -2  -8   14.63    5.14
   3  -8 -10  108.49   11.24
   3  -7 -11  136.32   12.26
  -3  -8  13   20.34    4.79
   6 -13   1   95.43   12.93
   6 -13   1  116.63   16.61
  -4  -7  13  190.18   12.94
   1 -13   7   75.92   13.01
   1 -13   7   82.43    8.45
   9 -10  -2  115.67   13.47
   9 -10  -2   96.21   16.16
  -5   3 -12    7.45    4.32
   5  -3  12   13.71   10.36
  -1  -8  14    2.24    1.21
  -1  -8  14    3.10    2.67
   3 -13  -1   54.48   10.46
   3 -13  -1   45.33   12.09
   8 -10  -5   44.57   12.31
   8 -10  -5   24.33    7.04
   1 -12  10   38.81    9.25
   1 -12  10   43.71   13.94
  -4  -8  12   64.33    6.66
  -7  -5  -2  121.10   10.88
  -7  -5  -2  107.39    8.60
  -5  -9   2  307.58   26.91
  -5  -9   2  307.28   25.02
   7  -2   9    0.12   15.01
  -7   2  -9   -1.02    3.50
  -4   7 -13   34.26    7.25
   4  -7  13   43.57   12.69
  -6  -6  -3   58.08   13.67
  -6  -6  -3   46.74    7.65
  -8  -5   4  931.45   46.39
  -8  -5   4  969.10   48.63
   8  -7   8  574.95   38.06
  -8   7  -8  594.27   29.68
  -8  -5   5  358.17   21.93
  -8  -5   5  347.28   17.69
  10  -7  -4   -3.99    6.24
  10  -7  -4    4.30    6.46
  10  -5  -6   10.34    8.84
  10  -5  -6   20.58   10.36
  -7  -3  12   75.18    5.31
   1 -13   1  148.00   10.91
   1 -13   1  109.02    9.55
  -9   0  -3  207.78   20.24
   9   0   3  233.26   45.64
   5  -4 -13    0.31    1.15
  -3  -7  -7  163.74   15.80
   6  -3 -13  145.42   10.27
   6  -5 -12    2.99    3.52
  10  -8  -1  117.38   18.54
   4  -3  13    7.18    9.46
  -4   3 -13   13.70    3.73
   6   4   6   34.38   24.11
  -6  -4  -6   51.41   11.28
  -7   9  -9  199.21   19.24
   7  -9   9  223.84   24.56
   9  -1   4   20.39   18.83
  -9   1  -4    7.97    5.48
  -6  -8   3    3.35    3.57
  -6  -8   3    8.86    3.10
   6 -13   4  383.95   24.49
   6 -13   4  431.29   28.61
  -3 -11   7   43.18    8.85
  -3 -11   7   30.89    9.26
   4   3  10   12.26   16.88
  -4  -3 -10   -0.79    3.17
   4  -9  -9   21.59    7.52
   7 -12  -2    4.98    8.10
   7 -12  -2    4.21    3.26
  10  -8   0  512.74   34.63
 -10   8   0  514.01   30.09
   3 -12  10    0.90    4.21
   3 -12  10   10.40    5.65
  -8  -3  10  246.65   22.12
  -9  -2   0    1.74    1.68
  -9  -2   0    2.75    3.80
   5 -11  -6   14.58    1.85
   5 -11  -6   12.78    4.16
  -5  11   6    7.03    3.44
   5 -13  -1    6.32    6.39
   5 -13  -1    4.82    3.00
  -3  -9  12   45.12   11.84
   0 -11  -4  113.39   12.51
   0 -11  -4  113.87   10.59
   5  -8 -10  156.55   10.79
   5 -12  -4   15.03    6.15
   5 -12  -4   21.54    5.21
  -5  12   4    3.38    3.81
   2   0 -15   31.99    6.54
  -2   0  15   37.46    9.17
   3 -12  -4   28.71    8.99
   3 -12  -4   32.12    8.97
   3 -11  -6   22.76    8.08
   3 -11  -6   28.69    5.39
  10  -7   2   72.51   18.61
 -10   7  -2   62.94   20.31
   1   6 -15   80.89    4.17
  -1  -6  15   82.04    7.29
  -8   4  -8   12.48    5.08
   8  -4   8    2.35   10.76
   7  -8  -9    6.79    5.25
   8   1   5   12.94   15.67
  -8  -1  -5    5.38    4.82
  -3   5 -14  553.47   29.55
   3  -5  14  556.60   29.76
  -5  11 -10   65.26   16.24
   5 -11  10   69.54   12.40
  10  -8  -2   95.27   16.86
  10  -8  -2   87.67   13.74
  -6  -7  -1   58.24    9.43
  -6  -7  -1   53.41    8.55
  -9   6  -6   93.53   10.15
   9  -6   6  101.18   24.98
  -4 -10   8    1.04    1.28
  -4 -10   8    0.07    1.13
   4  10  -8    0.69    1.28
  -8  -5   3    0.01    3.08
  -8  -5   3    0.29    2.07
 -10   2  -1   56.88    9.12
  10  -2   1   61.14   27.26
   0   6 -15  285.73   22.50
   0  -6  15  300.71   24.82
  -8  -5   6    1.72    1.70
  -8  -5   6    2.13    1.89
   4   0  12   -6.46    8.99
  -4   0 -12    0.92    1.21
   2 -13   8  346.66   20.85
   2 -13   8  342.05   22.30
   9 -10   3  593.30   34.64
  -9  10  -3  512.69   32.49
   8 -11  -3   45.10   12.57
   8 -11  -3   39.49    7.29
  -1  -8  -8  114.25   10.08
  -2   1 -14   21.58    7.81
   2  -1  14   16.60    9.19
  -6  -8   7    4.79    2.98
  -6  -8   7    2.55    1.09
   6   8  -7    3.08    1.94
  -5  -4  14   10.87    3.76
  -4  -6  -7   13.76    5.15
   4   6   7   21.55   18.78
   1 -11  -5   58.29   15.31
   1 -11  -5   61.41    4.13
   3   0 -15   72.02    3.14
  -3   0  15   76.96    5.21
   1  -4  15   44.54    8.60
  -1   4 -15   44.75   10.08
 -10   1   6   36.52    8.54
 -10   1   6   24.70   10.73
   9  -5   6  345.95   36.93
  -9   5  -6  326.56    9.11
   3 -13   8   31.65    8.06
   3 -13   8   25.98   10.30
  -5  -9   8  120.17    8.53
  -5  -9   8  128.18   15.44
   8  -8  -8  310.67   25.72
   8  -8  -8  281.80   21.27
  -9  -3   4    1.79    1.40
  -9  -3   4    0.89    1.99
   5  -7 -11   56.61    9.54
  -6  -4  13    4.18    2.31
  -1   4  13   63.34    6.62
   1  -4 -13   66.95   11.43
   0 -13   4  175.79   12.72
   0 -13   4  170.81   17.08
   2   3  12  474.77   34.16
  -2  -3 -12  449.39   22.94
  -1  -4 -12   66.83    9.98
   1   4  12   45.03   15.89
   4  -6 -12    9.87    4.03
  -6  -7  10   44.87   10.62
   7   0   8   -1.55   15.22
  -7   0  -8    5.27    4.03
   8  -7  -9    3.49    5.35
  -3   4 -14   77.06   10.90
   3  -4  14   68.05    9.82
  -2 -11  -1  304.37   26.00
  -2 -11  -1  339.04   17.53
   7  -7 -10   81.36    7.09
   0 -13   5   67.74   18.39
   0 -13   5   84.49    7.13
   3  -9  -9  286.34   22.69
  -3   9   9  233.96   17.78
  -5   8 -12   29.58    6.98
   5  -8  12   31.82   11.15
  -3   9 -13   52.82    8.33
   3  -9  13   50.05    9.83
   3  -6 -12   42.66    7.83
   0 -10  -6  173.42   10.85
   0 -10  -6  176.20   12.29
  -2  -8  -7   67.94    7.06
   6 -13   0  270.80   23.32
   6 -13   0  329.05   14.34
  -9  -3   5  146.90   11.21
  -9  -3   5  143.97   10.07
  -4  -8  -4  292.23   23.92
  -4  -8  -4  279.01   25.57
  -5  -7  12   69.78    4.30
   8 -11   5  325.33   15.34
  -8  11  -5  298.19   29.48
  -8   0  -6  378.62   22.70
   8   0   6  313.19   38.07
  10  -3   2   11.52   15.13
 -10   3  -2    9.28    3.98
  -4  -2  15  472.06   26.43
   4   2 -15  483.40   23.14
   1  -5  15   74.14    8.29
  -1   5 -15   58.22   10.67
  -9  -1  -2  234.00   19.14
   9   1   2  208.15   41.02
   0  -7 -10  199.15   19.47
   0   7  10  177.67   18.40
  -1 -11  11    1.83    2.23
  -1 -11  11    2.34    1.33
  -1 -11  11    2.99    3.93
  -3 -11   2   -1.43    3.01
  -3 -11   2    0.27    1.65
   5  -9  -9  232.72   21.66
   7  -6  10   -6.44    8.54
  -7   6 -10    3.49    3.28
 -10   8  -1    9.99    3.94
  10  -8   1    0.81   11.50
  -8  -4   9    1.39    1.01
  -8  -4   9    4.12    2.43
  -7  -6   0    4.68    2.47
  -7  -6   0   12.83    4.74
   7  -4 -12   17.25    5.31
   8   2   4   14.81   18.42
  -8  -2  -4   30.51    8.12
   0  -6 -11   29.82    9.16
   0   6  11   21.74   12.29
   0   6  11   16.69    4.19
  -3   6 -14   13.42    3.49
   3  -6  14    4.99    4.49
 -10   0   3   23.36    7.86
 -10   0   3   37.49    7.68
 -10   0   4    1.33    0.86
 -10   0   4    2.11    3.22
  -9  -3   3  651.66   36.70
  -9  -3   3  625.70   31.54
   5 -10  11  176.23   18.00
  -5  10 -11  204.64   20.18
  10  -3  -7   -0.24    4.23
  10  -3  -7   19.81   17.39
  -9  -1   9  132.12   11.57
   9   1  -9  113.36   10.79
   5  -2 -14   84.74    4.71
  -3  -7  14   77.31    6.89
   6 -11   9   66.66    9.55
  -6  11  -9   57.95   18.60
  -1 -10  -5   12.88    3.16
  -1 -10  -5   11.40    5.14
   9  -5  -9  246.66   21.40
   9  -5  -9  233.83   22.96
  -6  -1  -9   19.79    5.40
   6   1   9   12.51   16.54
   8  -4 -11   24.57   10.64
   8  -4 -11   25.28    6.03
   9  -9  -5  253.04   21.86
   9  -9  -5  258.74   23.51
  -6   3 -11  120.86   10.22
   6  -3  11   94.21   21.98
  -7  -6   9   30.66    7.00
   7  -9  -8   23.86    7.62
  -7   5 -10   59.28   14.04
   7  -5  10   62.94   18.81
  -1   3 -15    0.80    1.29
   1  -3  15    1.27    1.77
  -9  -2   8   91.00    8.22
  -9  -2   8   82.26    8.55
 -10   1   0    0.96    1.65
  10  -1   0    0.24   16.32
  -2  -9  13  407.16   19.38
  -2  -9  13  450.37   21.32
  -2  -9  13  526.84   27.25
  -4  -1  15  426.75   21.78
   4   1 -15  431.14   21.27
   6  -8  11    9.34    9.41
  -6   8 -11   -1.13    1.98
  -9   7  -6    2.78    5.31
   9  -7   6   -3.66   10.66
  -3  -9  -4  160.05   12.56
  -3  -9  -4  167.88   16.58
  -7  -4  -4   12.94    4.76
  -5  -6  13  332.89   15.02
   9  -2   5  128.97   32.64
  -9   2  -5  115.79   14.24
   0 -13   3   45.27   13.62
   0 -13   3   46.95    7.45
   5   0  11  421.07   33.11
  -5   0 -11  428.40   23.31
   0   1 -15  188.47   12.01
   0  -1  15  166.23   15.24
  -2 -11  10   29.13    7.73
  -2 -11  10   16.00    3.98
  -2 -11  10   25.86    5.25
  -8  -2  11    5.76    3.48
   3  -3 -14  449.67   22.01
  -2 -12   5  168.14   11.70
  -2 -12   5  175.37   14.88
  -4  -9  -2  140.46   11.52
  -4  -9  -2  133.81   14.05
   2  -7 -11  791.17   38.15
  -2   8 -14   16.07    4.36
   2  -8  14    9.58    6.22
   3   0  13   12.55   13.14
  -3   0 -13   21.88    6.44
  -4  11 -11   87.57   13.51
   4 -11  11  120.43   14.11
  -1 -12   0  111.65    9.92
  -1 -12   0  111.59    9.39
   0 -13   6  123.49   17.99
   0 -13   6  111.19    9.85
  10  -2  -7  298.64   25.13
  -1   0  15   27.66    7.12
   1   0 -15   43.73    6.84
   8  -8   8    7.06   13.44
  -8   8  -8    0.47    2.39
   6 -13   5   27.77   12.47
   6 -13   5   20.15    8.02
   9 -10  -3  223.80   20.21
   9 -10  -3  183.71   17.72
  -6  10 -10  116.84   12.10
   6 -10  10  134.57   13.33
  -7   0  13    2.18    1.64
   7   0 -13    9.86    2.98
  -2 -12   4    9.94    4.13
  -2 -12   4    5.41    3.45
  -4  -3  15    6.88    4.37
   4   3 -15   10.14    1.78
  -6  -8   2  192.37   20.14
  -6  -8   2  192.58   15.99
  10  -8  -3   31.43   12.78
  10  -8  -3   28.85   15.62
  10  -4  -7  157.43   14.15
  10  -4  -7  108.48   17.65
   1 -12  -3    0.48    0.83
   1 -12  -3    1.02    3.53
  -1 -11  -3   -1.17    1.70
  -1 -11  -3   -2.16    3.28
   2  -8 -10   10.51    4.47
  -2   8  10    6.83    4.51
  -4  -6  14    8.59    2.96
  -3  -5  15  261.25   24.30
   7 -11  -5  126.48   10.69
  -7  11   5  117.23   11.17
   7 -11  -5  128.78   13.13
   8  -9  -7    7.13    1.64
   8  -9  -7   10.04    5.77
  10  -5   3    5.34   13.23
 -10   5  -3    5.10    3.72
  -9   2  10   58.20   11.05
   9  -2 -10   56.49    9.28
  -9   4  -6  151.63   17.26
   9  -4   6  137.79   29.70
  -7   7 -10    7.12    5.69
   7  -7  10    5.99    8.69
 -10   0   2    3.78    2.69
  -2  -6  15    2.08    2.40
  -2  -6  15   10.00    1.48
   2   6 -15    9.00    3.00
 -10   0   5    5.92    3.73
 -10   0   5    2.60    1.46
   2 -13  -1   66.45    7.58
   2 -13  -1   71.96   12.25
  10  -6   3   30.27   14.14
 -10   6  -3   45.04   13.36
  -9  -3   6  108.09    9.91
  -9  -3   6  107.67    8.55
  -4 -10   1   -0.66    2.51
  -4 -10   1    0.48    1.73
   1 -10  13   11.29    6.07
   9  -9   5  739.95   44.75
  -9   9  -5  688.72   37.07
  -8  -5   2  185.14   12.89
  -8  -5   2  192.43   15.95
   0 -12  10   38.98    7.72
   0 -12  10   33.94   12.93
   5 -12   9  225.26   22.35
   5 -12   9  238.77   23.22
  -8  -5   7   45.35    9.05
  -8  -5   7   42.72    8.83
  -3 -11   8   84.27    4.99
  -3 -11   8  102.04   10.28
  -6  -5  -5  321.72   12.42
  -2 -12   6  241.72   19.60
  -2 -12   6  196.67   17.15
   9  -1 -10  138.07   10.39
  -9   1  10  129.48   12.06
  -4  -9  11   28.72    8.19
   7  -1 -13  266.43   20.45
  -7   1  13  319.50   25.88
   3  -3  14    3.00    5.82
  -3   3 -14   -0.13    2.62
   0   8   9  238.01   25.75
   0  -8  -9  294.70   23.94
  -8  -4  -1  154.35   11.27
  -8  -4  -1  171.14   12.83
  -5  -9   1    6.30    4.41
  -5  -9   1    3.83    2.82
   8  -6 -10  150.78   11.13
   1 -13   8   27.06    7.23
   1 -13   8   26.20    8.15
  -5  -4  -8  108.55   14.87
   5   4   8   99.25   25.02
  10  -6  -6  285.88   25.60
  10  -6  -6  267.61   26.01
   1 -11  12   19.64    7.35
   1 -11  12   21.39    6.76
  -1 -12   9   41.13   10.26
  -1 -12   9   61.54   12.15
   5 -13   7  107.59   12.64
   5 -13   7  123.05   15.04
   4  -8  13    7.81    7.96
  -4   8 -13    9.70    2.96
  -7  -1  13   94.55    7.94
   7   1 -13   84.46    1.68
  -5  -7  -4   17.46    4.49
  -5  -7  -4   19.39    4.71
  -5  -8  -2   75.43    6.98
  -5  -8  -2   73.55    5.81
   2  -3 -14   47.70   11.92
  -2   3  14   39.03    5.71
  10  -7  -5   85.76   14.85
  10  -7  -5  129.82   16.96
   4  -3 -14  229.84   16.42
   7 -12   6  158.74   17.82
   7 -12   6  167.03   21.38
   4   2  11   23.54   18.22
  -4  -2 -11   -2.03    2.87
   5  -6 -12  534.58   15.92
  -9  -3   2    6.51    3.57
  -9  -3   2    2.93    2.36
  -2  -8  14   10.55    2.58
  -2  -8  14   20.03    7.96
   1  -6  15  295.69   18.04
  -1   6 -15  284.44    9.99
   4 -13   8  104.83   15.77
   4 -13   8   96.84   17.98
   4 -10  -8  515.27   16.72
   6   1 -14   54.70    6.97
  -6  -1  14   50.62    7.12
   4 -13  -2    0.25    4.46
   4 -13  -2    3.31    2.87
   7  -6 -11   37.10    8.21
  -3 -10  -2   15.68    5.22
  -3 -10  -2   20.52    6.32
   1 -13   0   71.26    4.06
   1 -13   0   69.86    9.08
   1 -10  -7  419.56   15.80
   1 -10  -7  394.09   12.28
   3   2  12  609.38   31.60
  -3  -2 -12  517.97   14.94
  -5   2 -12    6.91    4.19
   5  -2  12    3.86    9.03
  -2 -10  12   -1.99    3.78
  -2 -10  12   -0.47    0.76
  -2 -10  12    0.17    0.44
   0  -5 -12   58.75   17.62
   0   5  12   71.14   12.75
  -7  -7   5  212.08   18.26
  -7  -7   5  227.71   18.94
   7  -4  10    8.27   11.44
  -7   4 -10   11.62    6.20
   0 -10  13  249.93   14.56
   0 -10  13  309.03   12.78
   0 -10  13  281.71   11.85
   0 -12  -2   91.10   15.32
   0 -12  -2  100.97   10.77
   8 -12   1  248.77   19.58
   8 -12   1  178.71   18.68
  -6   0  14  121.32    9.07
   6   0 -14  117.45    8.36
   4  -2  13   12.40    8.41
  -4   2 -13   20.02    7.31
  -4  10 -12  148.68   17.02
   4 -10  12  184.18   14.72
   5   3   9   11.47   12.06
  -5  -3  -9   33.29    8.18
   9  -3 -10   22.85    6.71
   2 -11  12   22.08    8.16
   2 -11  12   12.48    6.44
  -2   6  12    3.80    1.91
   2  -6 -12   13.32    4.54
  -6  -8   8   33.77    8.48
  -6  -8   8   43.08    7.40
   8  -3   8  253.42   31.73
  -8   3  -8  264.19   17.52
  -2 -12   3    6.97    3.69
  -2 -12   3    3.94    3.20
  -4   0  15   55.18    9.05
   4   0 -15   46.11    8.79
   8 -12   2  172.65   15.38
   8 -12   2  190.98   14.32
  10  -4   3   -4.10   17.32
 -10   4  -3    4.76    3.82
   6 -12  -4    5.15    4.87
   6 -12  -4    3.32    1.73
  -6  12   4    5.79    4.23
  -7  -7   4   23.16    6.64
  -7  -7   4   28.78    6.94
 -10   8  -2  604.92   22.41
  -5  -8  11   25.48    8.62
   8  -1   7  212.60   32.57
  -8   1  -7  208.83   19.53
   0 -13   2  294.02   12.32
   0 -13   2  270.01   10.78
  -3   7 -14  196.51   13.49
   3  -7  14  226.60   17.39
   2 -12  -4  433.55   15.76
   2 -12  -4  362.49   12.93
  -1  -1 -14   91.55   12.21
   1   1  14  106.11   15.23
   4 -12  10   -2.03    4.66
   4 -12  10   -3.08    5.76
   2 -11  -6  167.96   11.20
   2 -11  -6  159.50   12.83
   1  -2  15   -0.65    3.79
  -1   2 -15    1.96    1.30
  -9  10  -4    3.68    3.30
   9 -10   4   -0.72    6.56
   0   2  14   42.99    9.64
   0  -2 -14   34.63    5.77
   6 -13  -1  265.80   18.87
   6 -13  -1  272.90   11.91
   6 -12   8   14.30    7.44
  -7  -7   6    1.17    1.74
  -7  -7   6   -1.25    2.83
  10  -7   3    6.17   10.33
 -10   7  -3   30.85    6.41
   2 -10  13   38.02    7.24
  -2  10 -13   30.46    9.09
   5   5   7  135.59   25.60
  -5  -5  -7  167.26   12.66
   6  -8 -10   43.83   12.67
   8   3   3   19.49   16.97
  -8  -3  -3   13.95    5.29
 -10   1   7  111.01   15.91
 -10   1   7   92.27   14.11
   8 -12   0  297.82   20.32
   8 -12   0  293.78   19.09
   5 -10  -8  237.26   16.98
  -3 -10  11    5.15    2.21
  -3 -10  11    7.20    4.44
  -3 -10  11    2.84    0.87
   7 -12  -3   41.27    9.30
   7 -12  -3   34.49   10.94
  -3  -8  -6   76.50   15.29
  -3  -8  -6   96.47   13.92
   0 -13   7    2.93    2.28
   0 -13   7    1.31    2.89
  -9   8  -6   90.64   10.79
   9  -8   6   78.47   19.51
  -2   9   9   12.74    8.42
  -2   9   9    3.02    1.32
   2  -9  -9    1.46    3.07
  -4 -10   9    3.32    1.83
  -4 -10   9    9.26    4.41
  -7  -5  11  635.29   19.15
   3 -13  -2   46.46    6.59
   3 -13  -2   68.73    9.97
   5 -13  -2    1.58    1.90
   5 -13  -2    0.84    4.74
  -8  10  -7  175.20   21.62
   8 -10   7  193.07   19.86
  -6  -2  14   -1.20    1.91
  -4  -7  -6  301.45   14.37
  -4  -7  -6  288.59   10.71
  10  -5  -7   49.41   10.17
  10  -5  -7   56.48   15.55
   3 -10  -8    2.49    2.95
  -9   0  10    5.95    3.72
   9   0 -10    5.19    3.07
  -2 -12   7   33.77    6.09
  -2 -12   7   33.34    9.46
  10   0  -1   55.98   21.19
 -10   0   1   74.49   17.05
   3  -5 -13  261.27   17.04
 -10   0   6   18.10    6.36
 -10   0   6   33.90    7.80
  -9  -2  -1   31.44    8.51
  -5  -9   9  107.37   11.22
  -5  -9   9   93.87    9.99
   7 -10  -7    9.10    6.97
   0   7 -15   22.93    5.61
   0  -7  15   27.96    7.79
  -4  -4  15  307.46   16.50
  -3 -11   1  155.31   13.38
  -3 -11   1  175.09   12.04
  -2 -10  -4  112.40    8.69
  -2 -10  -4  109.44   13.20
  -3   1  15   10.51    3.13
   3  -1 -15   12.38    3.55
  -8   1  12  292.82   10.04
   8  -1 -12  247.25   17.32
   0 -11  12   -2.56    2.39
   0 -11  12    4.62    4.43
   4  -5 -13    4.36    2.77
   7  -2 -13  648.66   18.29
  -7   2  13  730.70   18.86
   2  -1 -15   97.99    9.71
  -2   1  15   90.92   11.32
   8 -12   3  145.89   13.63
   8 -12   3  162.97   20.02
  -9  -3   7    4.58    2.49
  -9  -3   7    3.54    2.19
  -1  -9  -7   19.16    6.57
  -1  -9  -7   23.15    7.57
   6  -9  -9  112.79    9.80
  -7   8 -10   15.38    5.42
   7  -8  10   20.05   12.80
   9  -7  -8   14.19    4.78
   9  -7  -8   58.01   11.44
   6  -1 -14    1.85    1.38
  -6   1  14    2.85    1.39
  10  -2   2   28.25   16.30
 -10   2  -2   43.05   10.45
  -7  -7   3   92.64   14.38
  -7  -7   3  110.91    8.27
  10  -8  -4   52.37   12.99
  10  -8  -4    6.50    7.92
   6  -7 -11    1.25    2.30
  -7  -4  12    3.86    2.87
  -8   0  12    2.24    1.89
   8   0 -12    1.82    1.50
  -7   1  -9    0.61    1.69
   7  -1   9   -1.55   14.97
   0  -9  14  242.76   24.84
  -8  11   4   10.65    6.79
   8 -11  -4   25.61    6.25
   8 -11  -4   27.74    9.66
   9  -8  -7   91.55   10.03
   9  -8  -7   99.52   15.19
   6  -4 -13   63.04   13.18
   7 -11   8  375.22   17.33
  -7  11  -8  343.63   15.22
  -7  -2  13    1.61    1.95
  -1  -3 -13  153.69   11.17
   1   3  13  157.98   17.99
  -6  -6  12   28.72    5.25
  -1   9 -14   -0.47    1.49
   1  -9  14   -0.39    4.03
 -10   1  -1    6.03    3.79
  10  -1   1   28.91   22.84
   6 -13   6   35.56   12.10
   6 -13   6   20.56    6.64
  -9   3  -6  290.32   11.52
   9  -3   6  270.43   35.91
  10  -9   0  350.82   19.79
  -5  -5  14   64.57    8.97
   7 -10   9    2.93    6.00
  -7  10  -9    1.77    2.61
  10  -9  -1  241.75   24.01
  10  -9  -1  228.92   19.25
   2 -13   9   27.67    8.39
   2 -13   9   33.80   10.75
  -5   9 -12   20.76    7.01
   5  -9  12   15.87    7.56
  -6  -8   1  222.43   13.89
  -6  -8   1  279.94   10.69
   9 -11   1    9.56    8.13
   9 -11   1   -0.95    9.38
   3 -14   4  185.93   14.02
   3 -14   4  199.78   20.82
  -8  -5   1   -0.11    2.44
  -8  -5   1    1.69    1.76
   5   2  10  148.56   37.98
  -5  -2 -10  135.62   10.84
   6   0  10   11.91   11.74
  -6   0 -10   16.88    5.84
  -8   2  12    6.57    2.09
   8  -2 -12    8.72    2.93
   8 -10  -6    3.29    1.81
   8 -10  -6    3.78    5.41
   9 -11   0    0.29    3.83
   9 -11   0   -6.02    8.28
   7 -13   2 1370.78   27.83
   7 -13   2 1355.11   36.68
  -8  -5   8    1.46    1.66
  -8  -5   8   -0.70    0.93
  -7  -7   7    4.99    1.79
  -7  -7   7   13.87    6.16
  -2 -12   2    3.44    4.58
  -2 -12   2    6.54    3.91
   4 -14   3   45.46    7.88
   4 -14   3   37.79    8.78
   3 -14   3   14.80    8.10
   3 -14   3   15.37    4.82
  -6   2 -11   23.30    9.79
   6  -2  11   17.01   16.82
  -9  -3   1  384.60   13.00
   8 -11   6   70.09   14.38
  -8  11  -6   66.26   18.56
   2 -12  11  320.91   14.76
   2 -12  11  301.20   19.72
   9  -4 -10   -0.32    3.02
   9  -4 -10    9.29    7.34
   6  -9  11  161.47   18.35
  -6   9 -11  162.65   15.15
   4 -14   4    0.93    4.31
   4 -14   4    4.29    3.64
   8 -12  -1    6.70   10.19
   8 -12  -1   10.72    3.86
   9 -10  -4   25.70   10.07
   9 -10  -4   39.62    7.56
   3 -13   9  158.05   16.35
   3 -13   9  140.44   14.72
  -2  -2 -13   33.96    7.14
   2   2  13   42.33   14.00
  -8   9  -8  209.38   14.11
   8  -9   8  248.86   23.77
   3  -2  14    3.92    6.61
  -3   2 -14   23.93    7.45
  -2   0 -14   36.61    7.80
   2   0  14   62.16   16.43
   0  -9  -8  261.02   20.50
   7 -13   1   -0.17    6.69
   7 -13   1    6.03    3.28
  -7  -5  -3   56.26   10.48
  -7  -5  -3   71.57   13.99
   3 -11  12  108.28   16.62
   7 -13   3   11.23    5.73
   7 -13   3   11.36    7.57
   0   0 -15    4.21    2.20
   0   0  15    5.85    4.27
 -10   3  -3   17.23    5.59
  10  -3   3   24.75   20.69
   1 -12  11   18.72    8.21
   1 -12  11    6.42    5.09
  -2  -9  -6   23.91    6.96
  -2  -9  -6   16.11    6.13
   4 -12  -5  140.68   12.25
   4 -12  -5  131.74    9.56
  10  -9   1   38.59   14.27
 -10   9  -1   38.16   11.87
   9   2  -9    0.06    2.03
  -9  -2   9    4.75    2.82
  -7  -6  -1  104.48   13.11
  -7  -6  -1  123.81   12.88
   3 -14   5  186.83   15.15
   3 -14   5  176.21   12.76
  -1 -10  13   20.95    7.45
  -1 -10  13   22.96    5.44
  -9   0  -4   12.32    4.82
   9   0   4    7.53   16.03
  -7   3 -10  104.17   12.02
   7  -3  10   69.60   24.10
   1  -7  15  337.03   14.07
  -1   7 -15  339.07   10.91
   8  -5 -11   64.30   14.00
  -3 -11   9    8.97    4.23
  -3 -11   9   14.84    2.84
   9  -6  -9    6.90    4.80
   9  -6  -9   17.70    5.70
   9 -11   2   78.85   13.47
   9 -11   2   87.81   21.27
  -1   3  14  253.48   16.17
   1  -3 -14  251.64   16.14
   5  -3 -14  185.99   11.32
  -6  -7  -2    1.38    3.72
  -6  -7  -2   -1.15    2.36
  10  -9  -2  141.43   16.95
  10  -9  -2  146.84   18.83
  10  -3  -8  130.70   21.51
  10  -3  -8   80.79   12.15
  -2   5  13  286.72   10.38
   2  -5 -13  256.95   15.77
  -6  -5  13  100.93   10.41
   4 -14   2   29.20    9.20
   4 -14   2   33.27    7.11
   0 -13   1   -0.08    3.21
   0 -13   1    0.10    2.36
  -7  -6  10   33.82    6.68
  -4   1  15    2.58    2.06
   4  -1 -15    1.85    1.34
   2  -5  15  175.96   20.31
  -2   5 -15  173.21   15.18
   9 -11  -1  171.34   13.56
   9 -11  -1  221.71   18.39
  -8  -4  10   15.00    5.42
  -3  -6  15    0.51    1.90
   8   1 -12  452.18   12.83
  -8  -1  12  540.32   15.64
  -4 -10   0   50.47   11.97
  -4 -10   0   48.60   11.04
  10  -2  -8  135.16   12.74
 -10   2   8  127.09    9.79
  -8  -3  11  128.27   15.86
   2  -4  15   23.51    8.61
  -2   4 -15   20.63    6.57
   0   4  13   54.27   10.27
   0  -4 -13   67.50   10.66
  -2 -11  -2  154.06   11.41
  -2 -11  -2  152.45   14.43
  10  -8   3  243.71   25.13
 -10   8  -3  239.58   17.55
   1  -7 -11  573.39   17.34
  -1   7  11  504.13   20.61
   3 -14   2   54.83   10.06
   3 -14   2   54.44   10.35
  -6  -3  14  132.32   11.86
  -6  -7  11    2.87    3.63
  -5  -6  -6    0.31    2.93
  -1 -12  -1    0.56    1.86
  -1 -12  -1    5.29    3.72
   9  -9  -6    1.01    1.57
   9  -9  -6    1.52    5.89
   8 -12   4    4.86    5.10
   8 -12   4   10.65   11.66
   4 -14   5   27.53    6.86
   4 -14   5   21.20    8.70
   5 -12  -5  413.81   16.00
   5 -12  -5  401.65   10.74
  -1  -9  14  108.69   13.07
  -1  -9  14   90.04    9.64
  -6  -8   9    9.36    3.00
  -6  -8   9   15.10    5.33
  -5  -9   0  253.03   18.04
  -5  -9   0  267.15   17.08
   5  -5 -13  108.45   10.55
   7  -5 -12    9.85    4.01
  -2 -12   8   17.48    5.71
  -2 -12   8   11.92    4.24
  -9   1  -5   48.62   12.74
   9  -1   5   13.82   17.45
  -6  -6  -4  379.72   13.16
  -6  -6  -4  409.06   19.02
  -9  -1  -3   89.56   14.98
   9   1   3   87.44   26.99
   1  -1 -15    1.20    1.61
  -1   1  15   -1.47    1.85
  -7  -7   2   38.03    9.17
  -7  -7   2   46.46    8.15
 -10  -1   4    0.40    1.64
 -10  -1   4    1.98    1.89
   1 -13   9    2.05    1.86
   1 -13   9    2.86    4.19
   0 -13   8  240.33   19.36
   0 -13   8  226.79   14.71
   5   1 -15  470.19   12.42
  -5  -1  15  484.76   15.12
   6 -10  -8   27.78   10.18
 -10   0   0   78.53   12.60
  10   0   0   18.33   23.39
   3  -8  14    9.63    6.11
  -3   8 -14   13.64    4.98
  10  -7  -6   36.92   12.31
  10  -7  -6   49.77   11.86
  10  -6   4   14.85   18.85
 -10   6  -4    3.43    3.56
   2 -14   4   30.42    6.78
   2 -14   4   28.66    7.12
 -10   0   7  145.08   17.26
 -10   0   7  151.17   13.79
  -1   8  10   34.66   11.79
   1  -8 -10   46.48    9.44
   9   1 -10   22.99    5.82
  -9  -1  10   20.24    5.59
   5   2 -15   40.40    5.41
  -5  -2  15   45.78   11.36
  -7  -2  -7   39.96   10.82
   7   2   7   28.12   21.71
  -1   1 -15   31.04    7.67
   1  -1  15   25.97    9.54
   7 -13   0  230.09   15.60
   7 -13   0  274.73   17.16
 -10  -1   3    7.91    3.29
 -10  -1   3   20.89    5.71
   6  -6 -12    4.92    4.04
   3 -12  11    7.84    5.66
   3 -12  11    1.95    5.54
  10  -4  -8  161.59   23.15
  10  -4  -8  134.08   13.67
  -2  -7  15   52.83    7.75
  10  -5   4   22.70   21.24
 -10   5  -4   14.89    5.16
   2 -13  -2   62.26    6.69
   2 -13  -2   65.44   10.17
   4  -9  13   62.21   10.23
  -4   9 -13   71.63    8.65
   7 -13   4    2.16    3.63
   7 -13   4   -0.52    8.33
   2  -9  14    1.94    5.07
  -2   9 -14    0.25    1.20
   8  -6   9    1.37   11.49
  -8   6  -9    4.79    4.30
   6 -13  -2   -0.19    1.22
   6 -13  -2    3.64    5.05
   5 -13   8   70.18   12.66
   5 -13   8   86.03   11.88
   1 -13  -1   32.79    8.12
   1 -13  -1   40.78    8.18
  -3  10 -13   27.75    8.92
   3 -10  13   19.79    8.39
   3 -12  -5  722.08   19.46
  -8   2  -8   13.42    6.36
   8  -2   8    1.79   12.93
   6  -2 -14   36.84    6.80
  -6   2  14   40.54    4.93
   2  -6  15   -1.05    4.21
  -2   6 -15   -0.55    2.08
 -10  -1   5    3.26    3.21
 -10  -1   5   11.44    4.30
  -4  -8  13   62.21   12.24
  -7  -3  -6   64.19   10.52
   7   3   6   36.41   21.88
  10  -6  -7   47.10   13.93
  10  -6  -7   42.75    9.74
  -2 -11  11   31.85    6.22
  -2 -11  11   32.39    4.74
  -8   3  12  173.63    3.09
   8  -3 -12  182.56   11.96
   2 -14   5    1.25    1.69
   2 -14   5    2.01    5.65
   4 -11  -7  869.43   25.33
   4 -11  -7  798.73   20.22
   7 -12   7   71.09   15.91
   2 -10  -8   77.68   18.41
  -4  -1 -12   37.99    6.90
   4   1  12    1.97   10.88
   5 -14   3   96.30   10.68
   5 -14   3   91.30   14.59
  -1 -12  10  351.82   11.50
  -1 -12  10  403.42   25.43
   2 -14   3  240.13   19.97
   2 -14   3  257.98   17.09
   1  -6 -12  329.82   14.22
  -1   6  12  327.72   15.46
   7  -3 -13   33.39    5.73
   9  -9   6   21.34   13.73
  -9   9  -6   28.44   12.84
  -9   6  -7   59.55    8.72
   9  -6   7   58.63   25.67
  -2  -6 -10  320.89   13.04
   2   6  10  306.45   29.70
   3 -14   6   19.77    6.30
   3 -14   6   22.02    8.87
   9 -10   5  115.95   19.74
  -9  10  -5   90.36   18.31
  -9  -3   8    1.37    1.55
  -9  -3   8    0.05    0.65
   4  -1  13    4.03    8.17
  -4   1 -13    2.47    3.44
  -4  -5  15   34.33    6.66
  10  -9   2  247.85   25.50
 -10   9  -2  265.20   24.37
  -3  -5 -10  563.30   17.40
   3   5  10  545.78   36.52
   2  -3  15   21.24    8.93
  -2   3 -15   19.85    4.27
   8  -5   9   97.42   24.72
  -8   5  -9  120.87   13.09
   9 -11   3    0.71    6.73
  -7  -7   8  410.17   18.46
  -7  -7   8  475.49   13.83
   4 -14   1   84.73   11.51
   4 -14   1  112.00   13.91
   0 -11  -5    8.48    2.89
   0 -11  -5    8.76    5.97
  -8  -4  -2    6.25    4.01
  -8  -4  -2   31.66    7.81
   5  -6  13  425.04   22.64
  -5   6 -13  396.99   12.78
  10  -1  -8   13.05    6.86
 -10   1   8    7.89    2.08
  -5   1 -12   -0.26    2.21
   5  -1  12    2.61   10.10
   5  -5  13    4.32    7.55
  -5   5 -13   17.70    4.68
   5 -14   2  121.12   14.38
   5 -14   2  130.53   15.39
  -5   0  15    0.84    0.72
   5   0 -15    0.57    0.89
   5 -14   4  126.29   17.02
   5 -14   4  126.63   12.92
   8  -7   9   33.78   15.03
  -8   7  -9   50.89    8.07
  10  -9  -3  208.00   21.78
  10  -9  -3  182.77   20.52
  -3  -6  -9   59.41   13.56
   3   6   9   56.45   20.72
  -3  -9  13   41.12    7.55
   4 -13   9  607.44   30.11
   4 -13   9  621.46   26.05
 -10   7  -4  376.61   15.12
  10  -7   4  350.44   31.95
   5 -11  -7   75.40   20.67
   8 -12  -2  135.39   13.96
   8 -12  -2  110.70   13.49
  10  -8  -5  157.44   15.13
  10  -8  -5  151.91   16.36
   4 -13  -3   55.95   10.69
   4 -13  -3   68.41   18.57
  -1 -11  12  342.16   20.31
  -1 -11  12  345.64   11.21
  -9   5  -7   -0.13    3.69
   9  -5   7    2.63   13.93
  -7  -3  13   86.58    9.18
   7  -9  10  138.10   19.14
  -7   9 -10  127.29   12.06
  -1 -13   5   66.27    8.74
  -1 -13   5   63.72    7.78
   2   5  11   89.98   23.40
  -2  -5 -11  106.46   13.20
   9 -11  -2  100.62   12.22
   9 -11  -2   80.65   15.27
  -3 -11   0   94.03   17.23
  -3 -11   0  116.66    9.64
   7   1   8    1.77   18.77
  -7  -1  -8   33.09    9.13
 -10  -1   2   -0.27    3.35
 -10  -1   2    1.78    2.55
  -4  -9  -3    2.28    2.90
  -4  -9  -3    3.28    3.40
  -2  -3  16  210.73   15.41
   2   3 -16  223.78   14.95
   9  -7   7   87.17   21.59
  -9   7  -7   89.37   11.80
  -2 -12   1  230.38   14.37
  -2 -12   1  240.97   22.02
  -4 -10  10   -1.02    2.27
  -4 -10  10    1.73    1.01
  -1 -13   4    7.96    4.01
  -1 -13   4    3.31    2.75
   5 -11  11   28.63    9.51
  -5  11 -11   19.84    7.42
   0 -12  11    4.42    4.63
   0 -12  11   12.31    4.52
   6  -6  12  246.76   27.19
  -6   6 -12  202.42   14.65
   3   1  13   16.77   14.60
  -3  -1 -13   11.98    4.59
  -3  -8  14   16.48    5.52
   8   1   6   -2.78   16.17
  -8  -1  -6    2.02    4.50
   7 -11  -6  318.48   14.91
   7 -11  -6  295.34    8.47
  -4  -7  14  153.51   16.47
   3 -14   1    4.87    2.79
   3 -14   1    7.93    8.38
  -5  -3  15   -0.24    1.69
  -1  -3  16    1.07    1.83
   1   3 -16    0.29    0.61
   4 -14   6   41.63    9.46
   4 -14   6   57.14   12.08
  -5  -9  10   18.65    4.60
  -5  -9  10   27.30    6.67
   8  -8  -9  110.35   10.78
 -10   4  -4   38.24    7.77
  10  -4   4   43.51   21.04
  -2  -7  -9    4.95    5.17
   2   7   9    5.09    9.83
  -1  -4  16   93.36   16.88
   1   4 -16   76.47   11.90
   7 -12  -4    0.53    4.76
   7 -12  -4    0.44    0.52
  -6  -3  -8   -1.94    2.92
   6   3   8   10.24   13.06
  -6   5 -12  247.66   21.01
   6  -5  12  277.50   24.65
  -8  -2  -5   93.49   11.39
   8   2   5   36.38   25.25
   2 -14   6   52.66    8.37
   2 -14   6   55.93    8.88
  -6  11 -10   20.58    6.69
   6 -11  10   26.08   10.39
  -9  -3   0   11.75    5.26
  -9  -3   0   18.33    5.34
  -5  -1 -11  131.73   12.32
   5   1  11  143.27   29.10
   1 -12  -4   -0.04    1.56
   1 -12  -4   -1.40    2.94
   5 -13  -3  154.98   10.10
   5 -13  -3  145.13   13.88
   6 -13   7   15.41   10.26
   6 -13   7   18.83    6.82
  -1 -13   6   -0.82    2.52
  -1 -13   6    2.73    3.29
   3 -11  -7  123.96    7.87
   3 -11  -7  143.83   12.88
  -8  -5   0   21.14    6.18
  -8  -5   0    4.97    1.95
   3  -4 -14  202.79   13.17
  -3   4  14  213.21   12.06
   2 -14   2   21.95    5.94
   2 -14   2   23.21    8.47
  -5  -7  13  320.26   11.67
 -10  -1   6    1.24    2.35
 -10  -1   6    7.14    2.80
   2   2 -16    9.95    2.79
  -2  -2  16    7.22    2.67
   9  -5 -10   33.46    7.90
   9  -5 -10   17.51    7.42
   1 -11  -6    3.62    2.47
   1 -11  -6    8.06    5.49
  -3  -4 -11  269.91    7.39
   3   4  11  238.81   28.48
   2   4 -16    2.10    1.48
  -2  -4  16   -1.62    2.52
  -8  -5   9  172.58    5.25
  -8  -5   9  163.79   16.39
   9  -2   6   19.24   16.36
  -9   2  -6   42.70   10.41
  -4  -8  -5   26.55    9.92
  -4  -8  -5   36.89    8.63
  -4  -9  12   55.20   15.34
  -6  -4  -7   26.61    7.38
   6   4   7   19.11   20.30
   1  -9  -9    4.56    3.35
  -1   9   9    1.69    4.78
  -3   2  15   20.96    5.79
   3  -2 -15   29.15    9.51
   5 -12  10   77.38   11.60
  -6  -8   0   -0.83    2.62
  -6  -8   0    0.59    3.04
  -9  -2  -2  454.71   15.29
  -5   7 -13   15.23    5.17
   5  -7  13    4.13    6.81
   0  -8  15   30.23    7.31
   0   8 -15   44.48    7.62
  -1 -11  -4   68.85   19.62
  -1 -11  -4   67.00   11.41
  -5   4 -13   84.33   10.20
   5  -4  13   74.92   19.70
   0 -12  -3   42.22    9.70
   0 -12  -3   45.92   10.82
  -8  -2  12   31.37    9.81
  10  -1   2    7.11   13.85
 -10   1  -2   30.08    9.88
   5 -14   1    0.44    2.01
   5 -14   1   -1.90    5.57
   5 -14   5   36.63   10.13
   5 -14   5   37.21   11.45
  -5  -8  -3   20.80    5.21
  -5  -8  -3   13.50    5.13
   7   4   5  261.26   41.45
  -7  -4  -5  243.72   22.38
   7 -13  -1   77.45   12.59
   7 -13  -1   99.46   12.83
   8  -7 -10    1.33    3.15
   4  -4 -14    4.99    3.94
   6 -12  -5   23.87    8.95
   6 -12  -5   24.12    5.34
   8  -9  -8    3.53    5.55
  -9  -4   4  180.02   14.37
  -9  -4   4  153.45   14.21
  10  -5  -8   25.01   11.55
  10  -5  -8   22.07    9.37
  -9  -4   5    0.78    0.73
  -9  -4   5    1.65    2.42
   6  -7  12  299.65   19.85
  -6   7 -12  304.42   11.37
  -4   5 -14  185.88   19.84
   4  -5  14  217.81   19.51
   3 -13  -3    1.10    1.21
   3 -13  -3    2.49    3.81
  -3 -10  -3   16.98    5.21
  -3 -10  -3   14.00    4.38
   7  -8 -10  209.49   15.30
  10  -2   3   76.14   25.17
 -10   2  -3  122.32   10.26
   8 -12   5    1.61    4.53
   8 -12   5    0.14    7.23
  -1 -13   3  183.46   11.98
  -1 -13   3  172.04   12.64
  -1  -6 -11  218.77   13.77
   1   6  11  197.30   28.14
   7 -13   5   47.21    9.80
   7 -13   5   45.54   14.10
  -3  -9  -5  494.12   17.13
  -3  -9  -5  524.50   21.33
  -5 -10   5  180.03   12.64
  -5 -10   5  179.84   12.49
  -8   4  -9   11.47    3.69
   8  -4   9   16.89   14.38
   4   5   9    1.07   12.14
  -4  -5  -9    5.40    4.06
   9  -2 -11   53.17    6.58
  -9   2  11   50.92    8.68
  -9   1  11   65.88    6.97
   9  -1 -11   66.13    7.54
  -1  -7 -10   89.62   10.11
   1   7  10   76.88   21.52
  -4   6 -14  261.56   17.76
   4  -6  14  289.15   16.87
   4  -8 -11  569.82   16.31
   1   2 -16    5.31    3.48
  -1  -2  16    1.08    2.11
   0 -13   0   40.65    8.47
   0 -13   0   51.99    8.21
  -8   0  -7   18.01    6.93
   8   0   7   49.29   34.79
   2  -7  15  175.83   20.02
  -2   7 -15  207.04   13.78
   6 -12   9  122.98   20.06
   8 -11  -5   48.02    8.10
   8 -11  -5   58.29   11.35
  -7  -7   1   18.29    4.91
  -7  -7   1   25.07    6.83
   6   2   9  -12.01   16.20
  -6  -2  -9   30.80    8.12
  -3   1 -14   24.13    6.80
   3  -1  14   14.36    9.29
   9 -10  -5   35.68    6.67
   9 -10  -5   53.80   14.40
  -2   2  15  304.03   12.45
   2  -2 -15  309.22   10.14
  -9   4  -7   19.51    7.88
   9  -4   7    1.96   13.97
   3   7   8  298.56   38.54
  -3  -7  -8  293.84   11.53
  -8  -6   5  124.93   11.67
  -8  -6   5  110.19   11.38
   1   5 -16  117.63    8.56
  -1  -5  16   99.00   12.95
  -5 -10   6   36.33    8.19
  -5 -10   6   27.06    8.25
  -8   8  -9  433.20   14.56
   8  -8   9  449.75   30.16
  -5  -8  12    6.94    4.29
   7  -9  -9   30.64    6.96
  -4  -4 -10    5.01    4.16
   4   4  10   -2.04   14.26
  -4 -11   5  197.61   13.46
  -4 -11   5  205.02   15.41
  -1 -10  -6   15.63    6.45
  -1 -10  -6    9.09    4.16
   7  -2  10   14.85   20.12
  -7   2 -10   25.20    7.18
 -11   5   2   10.92    4.91
  11  -5  -2    8.76   20.29
  -1   5  13  313.87   12.70
   1  -5 -13  268.62   16.39
  -1  -8  15   35.68    7.52
  -2 -12   9   48.31    8.38
  -2 -12   9   64.77   15.74
  -6  -4  14    2.74    2.93
  -5 -10   4    8.46    3.61
  -5 -10   4   15.03    4.36
   3 -14   7   21.13    9.82
   3 -14   7   22.77    6.44
   3   3 -16  462.60   13.34
  -3  -3  16  463.73   18.62
   0 -10  -7   83.26   20.98
   0 -10  -7   88.21    9.84
   3   2 -16   49.30    7.70
  -3  -2  16   58.30   11.67
  -8  -6   4   -0.52    1.26
  -8  -6   4    4.20    3.88
 -11   4   2   32.49   10.65
  11  -4  -2   41.56   19.89
   5  -1 -15   11.67    3.55
  -5   1  15    9.08    2.48
   1  -8  15   21.05    5.84
  -1   8 -15   21.14    4.85
 -11   4   3   12.97    5.10
  11  -4  -3   10.67   19.73
   2   4  12   87.07   20.84
  -2  -4 -12  112.37   11.19
  -9  -4   3  542.38   16.70
  -9  -4   3  523.19   25.65
   6  -4  12  175.75   21.76
  -6   4 -12  168.97   19.62
   0  -4  16   -1.21    2.82
   0   4 -16    3.34    2.89
  -9  -4   6   21.98    7.18
  -9  -4   6   26.19    7.80
  -3 -11  10   -0.31    0.78
  -3 -11  10   -1.51    2.98
   9  -8   7  325.87   24.57
  -9   8  -7  320.51   15.01
  -4 -11   6   90.59   12.43
  -4 -11   6  109.41   17.45
   4  -9 -10   20.60    7.49
 -11   5   3    0.42    2.25
  11  -5  -3   -0.46   10.36
 -10   8  -4  305.70   17.22
  10  -8   4  301.32   29.25
 -10   9  -3   54.53   19.60
  10  -9   3   73.67   14.98
  -3 -10  12    6.22    5.03
 -10  -1   1    1.28    3.68
   4 -11  12  132.01   14.34
  -4  11 -12  136.44   16.73
  -4   4 -14   37.76   10.51
   4  -4  14   35.41   10.68
   4  -2 -15  164.89   13.17
  -4   2  15  205.12   11.99
   4 -14   0  188.67   15.87
   4 -14   0  182.64   16.96
   2  -2  15    1.70    4.33
  -2   2 -15    0.58    2.99
  -1  -2 -14  132.35    9.69
   1   2  14  124.80   14.35
   2 -13  10    3.49    4.05
   2 -13  10    6.77    5.11
   6  -1  11    1.48   10.62
  -6   1 -11    7.56    4.36
  -1 -13   7   59.80    7.03
  -1 -13   7   68.03   13.49
   8 -10   8  319.79   18.44
  -8  10  -8  297.60   13.40
  -9  11  -4  143.65   19.77
   9 -11   4  153.72   16.19
   5 -10  12    4.05    7.33
  -5  10 -12   15.09    7.16
  -2   4  14  145.54    9.93
   2  -4 -14  135.48   10.11
   8 -11   7   24.49   10.10
  -8  11  -7    3.48    2.51
  -8  -6   6  113.73   10.57
  -8  -6   6   83.00   10.45
  -6  10 -11  294.82   14.22
   6 -10  11  308.55   19.20
   8   3   4   39.25   31.18
  -8  -3  -4   10.08    4.57
   0 -13   9    0.22    1.53
   0 -13   9   -0.32    3.65
  10   0   1   86.67   33.55
 -10   0  -1   44.23   12.82
  -4 -11   4  209.97   14.10
  -4 -11   4  189.81   13.82
   4  -7 -12    4.55    3.59
   7  -7 -11   11.56    5.22
  -2  -9  14   -0.43    3.14
 -11   5   1   58.57    9.81
  11  -5  -1   55.51   22.04
   3  -8 -11    5.13    2.87
  -5  -6  14    4.58    3.51
 -10   0   8   42.93   11.87
  10  -9  -4  103.83   14.34
  10  -9  -4   96.00   14.60
   2 -12  -5  121.46    9.69
   2 -12  -5  131.73    9.02
  -5  -7  -5   12.78    5.01
  -5  -7  -5   11.80    3.97
   6 -11  -7   61.54    9.44
   4 -12  11   22.19    7.72
   4   6   8   -5.89   11.55
  -4  -6  -8   -2.36    3.29
  -7  -5  12   40.31    9.24
  -2  -1  16    0.36    1.82
   2   1 -16    0.44    0.70
   8  -4 -12   38.07    8.71
   8  -4 -12   32.80    6.08
   5  -8 -11   40.13    9.63
   0  -3  16    0.86    2.01
   0   3 -16    3.19    2.80
  -2 -10  13   36.48    6.78
  -2 -10  13   48.09   12.71
   1 -14   4   59.35   12.49
   1 -14   4   53.28    8.28
   2   5 -16   20.34    6.81
  -2  -5  16   27.43    7.40
   9  -3 -11  100.16   10.28
   9   0 -11   10.81    3.22
  -9   0  11   17.43    4.51
  -6  -8  10   56.01   11.64
   1 -14   5  416.57   14.59
   1 -14   5  424.24   17.98
  -1  -5 -12   70.41   12.58
   1   5  12   51.81   17.46
   2 -14   7   10.03    4.42
   2 -14   7    7.81    5.60
   9 -11  -3   43.81   14.15
   9 -11  -3   55.34    7.29
   6  -5 -13   20.31    4.97
  -7   0  -9  239.36   16.91
   7   0   9  202.11   33.83
   0   5 -16   10.76    3.87
   0  -5  16   17.85    5.84
   6   5   6   -5.63   14.25
  -6  -5  -6   15.08    6.71
   0   1  15    9.04    6.15
   0  -1 -15   14.06    3.58
  11  -4  -1    2.02   12.85
 -11   4   1    1.06    2.05
   1 -11  13    1.79    2.57
   1 -11  13    5.06    4.64
   9   2 -10    2.31    2.77
  -9  -2  10    0.83    1.53
  11  -6  -2   40.92   20.41
 -11   6   2   49.67   13.69
  -2  -8  -8  398.61   13.31
   2   8   8  349.01   52.12
   3 -13  10   -2.49    4.92
   3 -13  10    0.60    3.55
 -11   4   4  159.80   19.97
  11  -4  -4  169.72   26.34
  -4 -10  -1   73.14   14.92
  -4 -10  -1   67.94   16.64
  -5 -10   7   22.50    7.87
  -5 -10   7   13.89    4.06
  10 -10   0  317.54   15.78
  10 -10   0  337.44   20.44
  -7  -7   9   48.97    6.85
  -7  -7   9   56.31    7.67
   4  -7  14  154.60   15.60
  -4   7 -14  142.60   16.16
   2 -14   1   35.96    9.93
   2 -14   1   34.68    5.96
  -5  -4  15   41.58   10.49
   5  -9 -10  101.46   11.53
   3  -7 -12   -1.24    2.80
   0  -3 -14  108.52   11.74
   0   3  14   84.28   12.69
   9  -8  -8    0.08    1.13
   9  -8  -8    4.64    4.51
   6  -3 -14  111.19   10.06
 -10   3  -4    0.34    2.30
  10  -3   4    4.11   15.67
  -6  -9   5    1.05    2.01
  -6  -9   5   -1.16    1.81
   1   8   9   16.54   15.37
  -1  -8  -9   26.71    7.68
  -7   6 -11   26.72    8.25
   7  -6  11   18.79   13.39
 -10  -1   7   42.82   11.24
 -10  -1   7   39.10   11.14
  11  -3  -3   34.80   19.59
 -11   3   3   56.50   12.88
  -7  -6  -2  226.57   15.74
  -7  -6  -2  243.18   20.61
   3 -14   0   60.43   11.94
   3 -14   0   55.12   12.63
 -11   6   1  110.15   12.54
  11  -6  -1  187.66   32.11
  -8  -6   3    2.50    3.24
  -8  -6   3    1.55    2.09
  -3  -4  16   79.46   11.35
   3   4 -16   73.43    8.76
   4 -14   7    1.20    1.37
   4 -14   7    1.21    5.68
  -7  11  -9   22.05    8.31
   7 -11   9   14.77    8.61
  -5  -9  -1   11.00    3.91
  -5  -9  -1    2.25    3.32
   3   1 -16    0.89    0.58
  -3  -1  16   -0.50    1.88
   8 -12  -3   13.73    4.28
   8 -12  -3   12.27    5.49
   5 -14   0  204.34   16.46
   5 -14   0  214.32   16.46
  10 -10  -1  273.72   16.27
  10 -10  -1  247.40   20.87
 -10   2   9  652.57   23.94
  10  -2  -9  554.77   17.53
   5 -14   6   -2.80    6.29
   5 -14   6   -3.10    2.92
   6 -14   3  133.60   17.95
   6 -14   3  120.16   12.20
  -1 -13   2  188.08   12.34
  -1 -13   2  153.93   15.37
   3  -9 -10  604.60   18.61
  -3   9 -14   -0.08    1.40
   3  -9  14    6.99    7.09
 -11   5   4  157.07   19.75
  11  -5  -4  187.55   28.69
  -9  -3   9    4.29    1.92
  -9  -3   9    8.54    5.02
  10  -3  -9  101.25   12.65
  10  -3  -9   80.35   17.29
  -4 -11   7    9.71    3.18
  -4 -11   7   21.66    7.21
   5  -8  13   84.67   14.61
  -5   8 -13   91.11   10.16
  -6   8 -12  110.84    7.10
   6  -8  12  100.20   15.42
   8  -6 -11  185.31   12.68
   6 -13  -3  218.53   14.77
   6 -13  -3  235.51   18.74
  -5 -10   3   55.84   16.99
  -5 -10   3   81.79    8.92
  -1   0 -15    6.51    3.26
   1   0  15   -0.57    3.78
  -6  -9   6   19.75    6.31
  -6  -9   6   19.34    5.71
   1 -14   3  176.37   21.36
   1 -14   3  184.46   15.66
  11  -3  -2  312.36   32.11
 -11   3   2  342.14   18.30
  -3  -7  15   41.85   11.05
   9  -7  -9  118.23   11.23
   9  -7  -9  108.52   11.15
   6 -14   2   81.34   12.54
   6 -14   2   98.13   16.24
  -5   3 -13   26.21    8.20
   5  -3  13   59.73   20.27
  10 -10   1   15.16   10.74
  -7  -6  11   19.06    5.51
   8 -10  -7    9.30    6.46
  -3  -3 -12   64.47   13.34
   3   3  12   34.45   17.13
  11  -6  -3   72.95   20.60
 -11   6   3   49.11   12.45
   1 -13  10  100.86   12.00
   1 -13  10   98.14   11.86
  -2  -1 -14   32.48   11.12
   2   1  14   35.97   13.46
   7  -4 -13   60.49    7.15
  10  -7  -7   70.03   20.37
  10  -7  -7   76.20   11.52
   5  -4 -14   11.26    3.53
  -6  -9   4   87.63   13.08
  -6  -9   4  102.10   10.05
   2 -11  13   -1.52    3.86
  -4  -3 -11   63.87   13.66
   4   3  11   48.83   17.19
  -7   5 -11  158.35   12.07
   7  -5  11  149.19   27.27
  -1 -12  -2   11.41    3.70
  -1 -12  -2   16.66    4.40
   1 -14   6   11.39    6.05
   1 -14   6   17.98    5.87
   5  -7 -12  163.59   16.35
   7 -10  -8  468.36   18.10
  11  -3  -4   23.13   19.02
 -11   3   4   54.87   11.71
  -7   7 -11   99.88   11.74
   7  -7  11  120.62   20.69
   1 -10  14   65.84   12.96
  -4 -11   3    5.34    4.18
  -4 -11   3   -0.01    2.37
  -8  -6   7   70.05    9.90
  -8  -6   7   79.63   10.58
  -8  -4  11   30.64    9.27
  -9  -4   2    0.35    3.00
  -9  -4   2    4.03    1.48
  -9  -4   7    3.69    2.39
  -9  -4   7   13.53    5.49
 -11   5   0   30.42    6.27
  11  -5   0   21.48   16.52
  -2 -10  -5   22.79    5.89
  -2 -10  -5   28.86    4.61
  -1  -1  16    2.36    3.27
   1   1 -16    6.32    2.55
  -2 -12   0    4.53    3.80
  -2 -12   0    9.47    4.26
  -7   0  14  119.32    8.38
   7   0 -14  111.31    8.34
   1 -13  -2    1.69    3.65
   1 -13  -2    2.54    3.05
  -4  -6  15   53.70    8.80
   6 -14   4   29.11   14.12
   6 -14   4   22.04    7.07
   2 -11  -7  101.34   10.12
   2 -11  -7  118.77   18.89
  10  -8  -6    4.22    5.34
  10  -8  -6    9.32    7.24
  10  -6   5   30.61   20.93
 -10   6  -5   27.64    7.68
   9  -9  -7  339.94   10.46
   9  -9  -7  370.65   16.44
   0 -11  13    8.35    4.36
   0 -11  13    2.71    2.63
   0 -10  14   23.29    7.27
   0 -10  14   22.16    9.61
  -9  10  -6   65.48   19.61
   9 -10   6   76.98   17.97
  -6  -7  -3    3.53    2.33
  -6  -7  -3   -0.96    2.64
   7 -13  -2  207.97   16.99
   7 -13  -2  211.87   13.69
   6   1  10   -0.48   13.83
  -6  -1 -10    0.04    1.94
   1   6 -16  599.09   16.48
  -1  -6  16  551.24   28.44
[truncated: 786,992 more chars]
