# Supplementary material for: Syntheses, Structures, and Electrochemical Properties of Metallacyclic Oxidovanadium(V) Complexes with Asymmetric Multidentate Linking Ligands
Source: Molecules. 2024 Apr 9;29(8):1700. doi: 10.3390/molecules29081700 (PMC11052122; doi:10.3390/molecules29081700)
Supplement: Supplementary file 1 [file molecules-29-01700-s001.zip › Complex2.cif]

data_global
_audit_creation_date                               2021-07-08
_audit_creation_method                            'by CrystalStructure 4.3'
_audit_update_record                               ?

#==============================================================================
# PROCESSING SUMMARY (IUCr Office Use Only)

_journal_date_recd_electronic                      ?
_journal_date_from_coeditor                        ?
_journal_date_accepted                             ?
_journal_coeditor_code                             ?

#==============================================================================
# SUBMISSION DETAILS

_publ_contact_author_name                         'ENTER NAME'
_publ_contact_author_email                        'ENTER EMAIL ADDRESS'
_publ_contact_author_fax                          'ENTER FAX NUMBER'
_publ_contact_author_phone                        'ENTER PHONE NUMBER'
_publ_contact_letter
;
    ENTER TEXT OF LETTER
;
_publ_requested_journal                           'ENTER JOURNAL NAME HERE'
_publ_requested_category
                                               'CHOOSE FI FM FO CI CM CO or AD'
_publ_requested_coeditor_name                      ?

#==============================================================================
# TITLE AND AUTHOR LIST

_publ_section_title
;
    ENTER SECTION TITLE
;
_publ_section_title_footnote
;
    ENTER FOOTNOTE TO TITLE OF PAPER
;
loop_
_publ_author_name
_publ_author_footnote
_publ_author_address
' FIRST AUTHORS NAME '
;
  FIRST AUTHORS FOOTNOTES
;
;
  FIRST AUTHORS ADDRESS
;
_publ_section_synopsis
;
    ENTER SYNOPSIS
;

#==============================================================================
# TEXT

_publ_section_abstract
;
    ENTER ABSTRACT
;
_publ_section_comment
;
    ENTER TEXT
;
_publ_section_references
;
    ENTER OTHER REFERENCES

    Rigaku (2018). CrystalStructure. Version 4.3. 
    Rigaku Corporation, Tokyo, Japan.

    Altomare, A., Cascarano, G., Giacovazzo, C. and Guagliardi, A. 
    (1993). J. Appl. Cryst. 26, 343-350.
    SIR92

    Sheldrick, G.M. (2008) SHELXL Version 2016/6, Acta Cryst. A64, 112-122.

;
_publ_section_figure_captions
;
    ENTER FIGURE CAPTIONS
;
_publ_section_exptl_prep
;
    ENTER COMPOUND PREPARATION DETAILS
;
_publ_section_exptl_refinement
;
    ENTER SPECIAL DETAILS OF THE REFINEMENT
;

#==============================================================================
data_VO_L5-Me_

#==============================================================================
# CHEMICAL DATA

_chemical_formula_sum                             'C70 H48 N8 O19 V3'
_chemical_formula_moiety                          'C70 H48 N8 O19 V3'
_chemical_formula_weight                           1458.02
_chemical_melting_point                            ?

#==============================================================================
# CRYSTAL DATA
_space_group_crystal_system                        triclinic
_space_group_name_H-M_alt                         'P -1'
_space_group_name_Hall                            '-P 1'
_space_group_IT_number                             2
loop_
_space_group_symop_id
_space_group_symop_operation_xyz
1   '+X,+Y,+Z'
2   '-X,-Y,-Z'
#------------------------------------------------------------------------------
_cell_length_a                                     15.307(5)
_cell_length_b                                     15.582(5)
_cell_length_c                                     18.458(5)
_cell_angle_alpha                                  87.11(2)
_cell_angle_beta                                   69.06(2)
_cell_angle_gamma                                  79.74(3)
_cell_volume                                       4045(2)
_cell_formula_units_Z                              2
_cell_measurement_reflns_used                      23
_cell_measurement_theta_min                        10.19
_cell_measurement_theta_max                        11.85
_cell_measurement_temperature                      292
#------------------------------------------------------------------------------
_exptl_crystal_description                         prismatic
_exptl_crystal_colour                              black
_exptl_crystal_size_max                            0.900
_exptl_crystal_size_mid                            0.300
_exptl_crystal_size_min                            0.100
_exptl_crystal_density_diffrn                      1.197
_exptl_crystal_density_meas                        ?
_exptl_crystal_density_method                     'not measured'
_exptl_crystal_F_000                               1490.00
_exptl_absorpt_coefficient_mu                      0.406
_exptl_absorpt_correction_type                     psi-scan
_exptl_absorpt_process_details
                                            '(North, Phillips & Mathews, 1968)'
_exptl_absorpt_correction_T_min                    0.885
_exptl_absorpt_correction_T_max                    0.960

#==============================================================================
# EXPERIMENTAL DATA

_diffrn_ambient_temperature                        292
_diffrn_radiation_type                            'Mo K\a'
_diffrn_radiation_wavelength                       0.71069
_diffrn_measurement_device_type                   'Rigaku AFC5S'
_diffrn_measurement_method                         \w-2\q
_diffrn_reflns_number                              11453
_diffrn_reflns_av_unetI/netI                       0.2692
_diffrn_reflns_av_R_equivalents                    0.0983
_diffrn_reflns_theta_max                           24.985
_diffrn_reflns_theta_min                           2.657
_diffrn_reflns_theta_full                          24.985
_diffrn_measured_fraction_theta_max                0.766
_diffrn_measured_fraction_theta_full               0.766
_diffrn_reflns_Laue_measured_fraction_max          0.766
_diffrn_reflns_Laue_measured_fraction_full         0.766
_diffrn_reflns_point_group_measured_fraction_max   0.766
_diffrn_reflns_point_group_measured_fraction_full  0.766
_diffrn_reflns_limit_h_min                        -18
_diffrn_reflns_limit_h_max                         17
_diffrn_reflns_limit_k_min                        -16
_diffrn_reflns_limit_k_max                         0
_diffrn_reflns_limit_l_min                        -21
_diffrn_reflns_limit_l_max                         21
_diffrn_standards_number                           3
_diffrn_standards_interval_count                   150
_diffrn_standards_decay_%                          0.362
_reflns_number_total                               10895
_reflns_number_gt                                  3661
_reflns_threshold_expression                       F^2^>2.0\s(F^2^)
_reflns_Friedel_coverage          0.000
_reflns_Friedel_fraction_max      .
_reflns_Friedel_fraction_full     .

#==============================================================================
# REFINEMENT DATA

_refine_special_details
;
    Refinement was performed using all reflections. The weighted 
    R-factor (wR) and goodness of fit (S) are based on F^2^.
    R-factor (gt) are based on F. The threshold expression of
    F^2^ > 2.0 sigma(F^2^) is used only for calculating R-factor (gt).
;
_refine_ls_structure_factor_coef                   Fsqd
_refine_ls_R_factor_all                            0.2692
_refine_ls_R_factor_gt                             0.0858
_refine_ls_wR_factor_ref                           0.3156
_refine_ls_wR_factor_gt                            0.2336
_refine_ls_number_restraints                       942
_refine_ls_hydrogen_treatment                      constr
_refine_ls_number_reflns                           10895
_refine_ls_number_parameters                       863
_refine_ls_goodness_of_fit_ref                     0.927
_refine_ls_weighting_scheme                        calc
_refine_ls_weighting_details
                   'w = 1/[\s^2^(Fo^2^)+(0.1722P)^2^] where P=(Fo^2^+2Fc^2^)/3'
_atom_sites_solution_hydrogens                     geom
_atom_sites_solution_primary                       direct
_atom_sites_solution_secondary                     difmap
_refine_ls_shift/su_max                            0.000
_refine_diff_density_max                           0.73
_refine_diff_density_min                          -0.35
_refine_ls_extinction_method                       none
_refine_ls_extinction_coef                         ?

loop_
_atom_type_symbol
_atom_type_description
_atom_type_scat_dispersion_real
_atom_type_scat_dispersion_imag
_atom_type_scat_source
  'C' 'C'  0.0033 0.0016 
;
International Tables for Crystallography
(Vol. C, Tables 4.2.6.8 and 6.1.1.4)
;
  'H' 'H'  0.0000 0.0000 
;
International Tables for Crystallography
(Vol. C, Table 6.1.1.4)
;
  'N' 'N'  0.0061 0.0033 
;
International Tables for Crystallography
(Vol. C, Tables 4.2.6.8 and 6.1.1.4)
;
  'O' 'O'  0.0106 0.0060 
;
International Tables for Crystallography
(Vol. C, Tables 4.2.6.8 and 6.1.1.4)
;
  'V' 'V'  0.3005 0.5294 
;
International Tables for Crystallography
(Vol. C, Tables 4.2.6.8 and 6.1.1.4)
;

#==============================================================================
# ATOMIC COORDINATES AND THERMAL PARAMETERS

loop_
 _atom_site_label
 _atom_site_type_symbol
 _atom_site_fract_x
 _atom_site_fract_y
 _atom_site_fract_z
 _atom_site_U_iso_or_equiv
 _atom_site_adp_type
 _atom_site_occupancy
 _atom_site_site_symmetry_order  
 _atom_site_calc_flag
 _atom_site_refinement_flags_posn
 _atom_site_refinement_flags_adp
 _atom_site_refinement_flags_occupancy
 _atom_site_disorder_assembly
 _atom_site_disorder_group
V1 V 0.37210(15) 0.22595(13) 1.03361(11) 0.0591(6) Uani 1 1 d . . . . .
V2 V 0.64828(15) 0.31001(14) 0.56519(11) 0.0661(7) Uani 1 1 d . . . . .
V3 V 0.06508(14) 0.49981(13) 0.77699(11) 0.0602(6) Uani 1 1 d . . . . .
O1 O 0.4536(6) 0.1402(5) 0.9602(4) 0.069(2) Uani 1 1 d . . . . .
O2 O 0.2999(5) 0.3392(5) 1.0641(4) 0.063(2) Uani 1 1 d . . . . .
O3 O 0.1051(5) 0.5820(5) 0.9917(4) 0.064(2) Uani 1 1 d . . . . .
O4 O -0.0235(5) 0.5968(5) 0.8218(4) 0.064(2) Uani 1 1 d . . . . .
O5 O 0.5697(6) 0.2796(5) 0.5173(4) 0.068(2) Uani 1 1 d . . . . .
O6 O 0.6755(6) 0.3634(5) 0.6450(4) 0.074(2) Uani 1 1 d . . . . .
O7 O 0.5939(6) 0.3901(5) 0.9219(4) 0.068(2) Uani 1 1 d . . . . .
O8 O 0.4337(5) 0.2418(5) 1.0999(4) 0.0593(19) Uani 1 1 d . . . . .
O9 O 0.0224(5) 0.4044(5) 0.8330(4) 0.068(2) Uani 1 1 d . . . . .
O10 O 0.1573(5) 0.5742(4) 0.7356(4) 0.0595(19) Uani 1 1 d . . . . .
O11 O 0.4899(5) 0.5861(5) 0.5956(4) 0.0576(19) Uani 1 1 d . . . . .
O12 O 0.7206(5) 0.3809(5) 0.4976(4) 0.067(2) Uani 1 1 d . . . . .
O13 O 0.3059(6) 0.1624(5) 1.0860(4) 0.077(2) Uani 1 1 d . . . . .
O14 O 0.7235(6) 0.2193(6) 0.5494(5) 0.095(3) Uani 1 1 d . . . . .
O15 O 0.0309(5) 0.4855(6) 0.7070(4) 0.077(2) Uani 1 1 d . . . . .
O16A O 0.700(3) 0.107(2) 0.944(2) 0.188(14) Uiso 0.4 1 d . . P . .
O16B O 0.924(3) 0.256(2) 0.614(2) 0.185(14) Uiso 0.4 1 d . . P . .
O16C O 0.689(5) -0.013(4) 0.658(4) 0.17(3) Uiso 0.2 1 d . . P . .
O17A O 0.184(3) 0.860(2) 0.907(2) 0.212(15) Uiso 0.45 1 d . . P . .
O17B O 0.238(2) 0.7410(18) 0.8506(17) 0.199(11) Uiso 0.55 1 d . . P . .
N1 N 0.2990(6) 0.2481(5) 0.9556(5) 0.051(2) Uani 1 1 d . . . . .
N2 N 0.0996(6) 0.5121(6) 0.8908(5) 0.055(2) Uani 1 1 d . . . . .
N3 N 0.5544(6) 0.2612(6) 0.6665(5) 0.057(2) Uani 1 1 d . . . . .
N4 N 0.4858(7) 0.3021(6) 0.9500(5) 0.059(2) Uani 1 1 d . . . . .
N5 N 0.1920(6) 0.4088(6) 0.7284(5) 0.052(2) Uani 1 1 d . . . . .
N6 N 0.5338(6) 0.4401(6) 0.5875(5) 0.058(2) Uani 1 1 d . . . . .
N7 N 0.2498(17) 0.8334(15) 0.6677(14) 0.233(10) Uiso 1 1 d D . . . .
N8 N -0.199(3) 0.579(2) 0.733(2) 0.376(19) Uiso 1 1 d D . . . .
C1 C 0.4328(9) 0.0826(8) 0.9184(7) 0.065(3) Uani 1 1 d . . . . .
C2 C 0.4953(10) 0.0061(8) 0.8922(8) 0.084(4) Uani 1 1 d . . . . .
H2 H 0.547134 -0.008362 0.908237 0.101 Uiso 1 1 calc R U . . .
C3 C 0.4826(12) -0.0489(9) 0.8432(9) 0.099(5) Uani 1 1 d . . . . .
H3 H 0.526745 -0.099560 0.825397 0.118 Uiso 1 1 calc R U . . .
C4 C 0.4043(12) -0.0305(9) 0.8192(9) 0.097(4) Uani 1 1 d . . . . .
C5 C 0.3414(10) 0.0481(8) 0.8451(8) 0.085(4) Uani 1 1 d . . . . .
H5 H 0.290073 0.062666 0.828438 0.102 Uiso 1 1 calc R U . . .
C6 C 0.3541(9) 0.1056(7) 0.8958(7) 0.062(3) Uani 1 1 d . . . . .
C7 C 0.2941(8) 0.1871(7) 0.9114(6) 0.062(3) Uani 1 1 d . . . . .
H7 H 0.247766 0.198673 0.888865 0.074 Uiso 1 1 calc R U . . .
C8 C 0.2441(8) 0.3342(7) 0.9610(6) 0.053(3) Uani 1 1 d . . . . .
C9 C 0.2486(7) 0.3821(7) 1.0230(5) 0.049(2) Uani 1 1 d . . . . .
C10 C 0.2002(8) 0.4681(7) 1.0389(6) 0.063(3) Uani 1 1 d . . . . .
H10 H 0.200113 0.500770 1.079719 0.076 Uiso 1 1 calc R U . . .
C11 C 0.1533(8) 0.5005(7) 0.9904(6) 0.052(3) Uani 1 1 d . . . . .
C12 C 0.1508(8) 0.4567(7) 0.9282(6) 0.052(3) Uani 1 1 d . . . . .
C13 C 0.1960(7) 0.3704(7) 0.9126(6) 0.050(3) Uani 1 1 d . . . . .
H13 H 0.194165 0.338762 0.871932 0.060 Uiso 1 1 calc R U . . .
C14 C 0.0730(8) 0.5843(7) 0.9299(6) 0.054(3) Uani 1 1 d . . . . .
C15 C 0.0145(8) 0.6634(7) 0.9170(6) 0.058(3) Uani 1 1 d . . . . .
C16 C 0.0009(9) 0.7408(8) 0.9621(8) 0.084(4) Uani 1 1 d . . . . .
H16 H 0.029704 0.738545 0.998928 0.100 Uiso 1 1 calc R U . . .
C17 C -0.0541(11) 0.8187(9) 0.9522(9) 0.095(4) Uani 1 1 d . . . . .
C18 C -0.0960(11) 0.8148(9) 0.8965(10) 0.101(5) Uani 1 1 d . . . . .
H18 H -0.134046 0.865371 0.888704 0.121 Uiso 1 1 calc R U . . .
C19 C -0.0858(9) 0.7426(9) 0.8525(8) 0.088(4) Uani 1 1 d . . . . .
H19 H -0.116095 0.745249 0.816652 0.105 Uiso 1 1 calc R U . . .
C20 C -0.0290(8) 0.6649(8) 0.8623(7) 0.063(3) Uani 1 1 d . . . . .
C21 C 0.3917(12) -0.0920(8) 0.7625(9) 0.117(6) Uani 1 1 d . . . . .
H21A H 0.333416 -0.070462 0.753940 0.141 Uiso 1 1 calc R U . . .
H21B H 0.389730 -0.149278 0.784089 0.141 Uiso 1 1 calc R U . . .
H21C H 0.443967 -0.094620 0.714105 0.141 Uiso 1 1 calc R U . . .
C22 C -0.0631(12) 0.8958(9) 0.9967(11) 0.142(7) Uani 1 1 d . . . . .
H22A H -0.013346 0.888310 1.017771 0.170 Uiso 1 1 calc R U . . .
H22B H -0.123608 0.904695 1.038155 0.170 Uiso 1 1 calc R U . . .
H22C H -0.058325 0.945632 0.963525 0.170 Uiso 1 1 calc R U . . .
C23 C 0.5223(8) 0.2161(8) 0.5280(6) 0.059(3) Uani 1 1 d . . . . .
C24 C 0.5004(9) 0.1890(9) 0.4664(7) 0.079(4) Uani 1 1 d . . . . .
H24 H 0.523249 0.214270 0.417988 0.095 Uiso 1 1 calc R U . . .
C25 C 0.4467(11) 0.1269(10) 0.4766(8) 0.097(4) Uani 1 1 d . . . . .
H25 H 0.436321 0.108086 0.433756 0.116 Uiso 1 1 calc R U . . .
C26 C 0.4041(9) 0.0879(9) 0.5509(8) 0.079(3) Uani 1 1 d . . . . .
C27 C 0.4309(9) 0.1133(7) 0.6104(7) 0.071(3) Uani 1 1 d . . . . .
H27 H 0.409393 0.086791 0.658360 0.085 Uiso 1 1 calc R U . . .
C28 C 0.4875(8) 0.1754(7) 0.6020(7) 0.060(3) Uani 1 1 d . . . . .
C29 C 0.5006(8) 0.2038(7) 0.6673(6) 0.061(3) Uani 1 1 d . . . . .
H29 H 0.468941 0.180475 0.714845 0.074 Uiso 1 1 calc R U . . .
C30 C 0.5594(8) 0.2917(7) 0.7362(6) 0.060(3) Uani 1 1 d . . . . .
C31 C 0.6273(8) 0.3474(7) 0.7197(6) 0.057(3) Uani 1 1 d . . . . .
C32 C 0.6441(9) 0.3850(8) 0.7813(6) 0.071(4) Uani 1 1 d . . . . .
H32 H 0.688283 0.421870 0.772682 0.086 Uiso 1 1 calc R U . . .
C33 C 0.5913(8) 0.3632(8) 0.8525(6) 0.061(3) Uani 1 1 d . . . . .
C34 C 0.5265(8) 0.3083(7) 0.8693(6) 0.054(3) Uani 1 1 d . . . . .
C35 C 0.5091(8) 0.2705(7) 0.8110(6) 0.057(3) Uani 1 1 d . . . . .
H35 H 0.465543 0.232620 0.821618 0.069 Uiso 1 1 calc R U . . .
C36 C 0.5292(8) 0.3512(8) 0.9763(6) 0.059(3) Uani 1 1 d . . . . .
C37 C 0.5223(9) 0.3627(7) 1.0571(6) 0.062(3) Uani 1 1 d . . . . .
C38 C 0.5626(9) 0.4253(8) 1.0772(7) 0.071(3) Uani 1 1 d . . . . .
H38 H 0.592979 0.462553 1.039295 0.085 Uiso 1 1 calc R U . . .
C39 C 0.5594(8) 0.4344(7) 1.1521(6) 0.059(3) Uani 1 1 d . . . . .
C40 C 0.5132(9) 0.3800(7) 1.2065(6) 0.064(3) Uani 1 1 d . . . . .
H40 H 0.510982 0.384920 1.257192 0.076 Uiso 1 1 calc R U . . .
C41 C 0.4696(9) 0.3177(8) 1.1893(6) 0.068(3) Uani 1 1 d . . . . .
H41 H 0.437381 0.282862 1.228583 0.082 Uiso 1 1 calc R U . . .
C42 C 0.4730(8) 0.3061(7) 1.1132(6) 0.055(3) Uani 1 1 d . . . . .
C43 C 0.3356(10) 0.0206(9) 0.5625(8) 0.102(5) Uani 1 1 d . . . . .
H43A H 0.311015 0.006039 0.616374 0.122 Uiso 1 1 calc R U . . .
H43B H 0.369762 -0.031210 0.532381 0.122 Uiso 1 1 calc R U . . .
H43C H 0.284003 0.045711 0.545895 0.122 Uiso 1 1 calc R U . . .
C44 C 0.6087(10) 0.5009(8) 1.1714(7) 0.083(4) Uani 1 1 d . . . . .
H44A H 0.666496 0.471915 1.177434 0.099 Uiso 1 1 calc R U . . .
H44B H 0.567908 0.530838 1.218865 0.099 Uiso 1 1 calc R U . . .
H44C H 0.623082 0.542174 1.130229 0.099 Uiso 1 1 calc R U . . .
C45 C 0.0343(9) 0.3211(8) 0.8134(7) 0.067(3) Uani 1 1 d . . . . .
C46 C -0.0389(10) 0.2717(9) 0.8500(8) 0.087(4) Uani 1 1 d . . . . .
H46 H -0.096056 0.297650 0.886583 0.104 Uiso 1 1 calc R U . . .
C47 C -0.0236(12) 0.1841(10) 0.8302(9) 0.114(6) Uani 1 1 d . . . . .
H47 H -0.072636 0.152612 0.852624 0.137 Uiso 1 1 calc R U . . .
C48 C 0.0644(12) 0.1404(10) 0.7767(11) 0.118(6) Uani 1 1 d . . . . .
C49 C 0.1333(9) 0.1898(8) 0.7407(8) 0.088(4) Uani 1 1 d . . . . .
H49 H 0.190440 0.163139 0.704478 0.106 Uiso 1 1 calc R U . . .
C50 C 0.1201(9) 0.2814(8) 0.7571(7) 0.063(3) Uani 1 1 d . . . . .
C51 C 0.1990(9) 0.3261(8) 0.7189(7) 0.066(3) Uani 1 1 d . . . . .
H51 H 0.256113 0.294515 0.686749 0.079 Uiso 1 1 calc R U . . .
C52 C 0.2733(8) 0.4496(7) 0.6917(6) 0.049(2) Uani 1 1 d . . . . .
C53 C 0.2493(8) 0.5410(7) 0.6969(6) 0.054(3) Uani 1 1 d . . . . .
C54 C 0.3170(8) 0.5944(7) 0.6633(6) 0.054(3) Uani 1 1 d . . . . .
H54 H 0.301467 0.654909 0.663866 0.065 Uiso 1 1 calc R U . . .
C55 C 0.4084(8) 0.5506(7) 0.6293(6) 0.053(3) Uani 1 1 d . . . . .
C56 C 0.4362(8) 0.4603(7) 0.6237(5) 0.050(2) Uani 1 1 d . . . . .
C57 C 0.3657(7) 0.4067(7) 0.6546(5) 0.048(2) Uani 1 1 d . . . . .
H57 H 0.380639 0.346254 0.650207 0.058 Uiso 1 1 calc R U . . .
C58 C 0.5608(8) 0.5140(8) 0.5714(6) 0.053(3) Uani 1 1 d . . . . .
C59 C 0.6571(9) 0.5348(8) 0.5341(6) 0.060(3) Uani 1 1 d . . . . .
C60 C 0.6742(9) 0.6189(8) 0.5290(7) 0.073(3) Uani 1 1 d . . . . .
H60 H 0.624246 0.664285 0.551190 0.088 Uiso 1 1 calc R U . . .
C61 C 0.7647(10) 0.6369(9) 0.4914(7) 0.077(3) Uani 1 1 d . . . . .
C62 C 0.8355(10) 0.5691(10) 0.4565(8) 0.092(4) Uani 1 1 d . . . . .
H62 H 0.895914 0.581539 0.429535 0.110 Uiso 1 1 calc R U . . .
C63 C 0.8231(9) 0.4854(9) 0.4588(7) 0.076(4) Uani 1 1 d . . . . .
H63 H 0.874284 0.441681 0.434913 0.091 Uiso 1 1 calc R U . . .
C64 C 0.7328(9) 0.4648(9) 0.4972(6) 0.068(3) Uani 1 1 d . . . . .
C65 C 0.0786(13) 0.0443(9) 0.7598(12) 0.160(9) Uani 1 1 d . . . . .
H65A H 0.108119 0.011903 0.793028 0.192 Uiso 1 1 calc R U . . .
H65B H 0.118503 0.032296 0.706585 0.192 Uiso 1 1 calc R U . . .
H65C H 0.018194 0.027501 0.768970 0.192 Uiso 1 1 calc R U . . .
C66 C 0.7880(11) 0.7282(10) 0.4871(10) 0.125(6) Uani 1 1 d . . . . .
H66A H 0.746506 0.760923 0.532841 0.151 Uiso 1 1 calc R U . . .
H66B H 0.779481 0.756790 0.442131 0.151 Uiso 1 1 calc R U . . .
H66C H 0.852677 0.724707 0.483405 0.151 Uiso 1 1 calc R U . . .
C67 C 0.1011(18) 0.7805(16) 0.6438(16) 0.238(12) Uiso 1 1 d D . . . .
H67A H 0.129748 0.731684 0.608549 0.285 Uiso 1 1 calc R U . . .
H67B H 0.064475 0.823548 0.622239 0.285 Uiso 1 1 calc R U . . .
H67C H 0.060260 0.761231 0.692353 0.285 Uiso 1 1 calc R U . . .
C68 C 0.1782(19) 0.8200(16) 0.6571(16) 0.197(10) Uiso 1 1 d D . . . .
C69 C -0.079(2) 0.6647(19) 0.6209(18) 0.286(16) Uiso 1 1 d D . . . .
H69A H -0.018328 0.628523 0.609937 0.343 Uiso 1 1 calc R U . . .
H69B H -0.080699 0.718091 0.645328 0.343 Uiso 1 1 calc R U . . .
H69C H -0.090934 0.677575 0.573334 0.343 Uiso 1 1 calc R U . . .
C70 C -0.156(3) 0.617(2) 0.675(2) 0.267(15) Uiso 1 1 d D . . . .

loop_
 _atom_site_aniso_label
 _atom_site_aniso_U_11
 _atom_site_aniso_U_22
 _atom_site_aniso_U_33
 _atom_site_aniso_U_23
 _atom_site_aniso_U_13
 _atom_site_aniso_U_12
V1 0.0709(15) 0.0621(13) 0.0463(12) 0.0061(10) -0.0242(10) -0.0111(11)
V2 0.0699(15) 0.0807(16) 0.0378(12) -0.0025(11) -0.0096(10) -0.0066(12)
V3 0.0495(13) 0.0717(15) 0.0526(13) -0.0012(10) -0.0118(10) -0.0056(10)
O1 0.085(6) 0.054(5) 0.070(5) -0.002(4) -0.035(4) 0.001(4)
O2 0.077(5) 0.066(5) 0.048(4) 0.000(4) -0.025(4) -0.007(4)
O3 0.074(5) 0.058(4) 0.051(4) -0.002(4) -0.016(4) -0.001(4)
O4 0.049(5) 0.072(5) 0.061(5) 0.002(4) -0.012(4) -0.001(4)
O5 0.094(6) 0.065(5) 0.051(4) -0.003(4) -0.029(4) -0.017(4)
O6 0.078(6) 0.104(6) 0.044(4) 0.008(4) -0.021(4) -0.029(5)
O7 0.083(6) 0.093(6) 0.038(4) 0.007(4) -0.026(4) -0.037(5)
O8 0.079(5) 0.062(5) 0.046(4) 0.004(4) -0.034(4) -0.010(4)
O9 0.073(5) 0.070(5) 0.052(5) -0.010(4) -0.008(4) -0.016(4)
O10 0.052(4) 0.053(4) 0.059(5) 0.003(4) -0.008(4) 0.004(3)
O11 0.062(4) 0.064(4) 0.047(4) 0.006(4) -0.017(4) -0.017(4)
O12 0.062(5) 0.091(5) 0.038(4) -0.002(4) -0.007(4) -0.014(4)
O13 0.096(6) 0.079(6) 0.066(5) 0.018(4) -0.035(4) -0.029(5)
O14 0.081(6) 0.094(6) 0.076(6) -0.006(5) -0.002(5) 0.015(5)
O15 0.061(5) 0.114(7) 0.053(5) -0.002(4) -0.018(4) -0.010(5)
N1 0.054(5) 0.052(5) 0.047(5) 0.002(4) -0.019(4) -0.007(4)
N2 0.054(6) 0.052(5) 0.049(5) 0.001(4) -0.009(4) -0.005(4)
N3 0.047(6) 0.084(6) 0.042(4) 0.003(4) -0.019(4) -0.011(4)
N4 0.075(6) 0.074(6) 0.033(4) 0.008(4) -0.023(4) -0.021(5)
N5 0.051(5) 0.060(5) 0.048(5) 0.000(4) -0.020(4) -0.015(4)
N6 0.049(5) 0.076(5) 0.045(5) -0.011(5) -0.009(4) -0.011(4)
C1 0.077(8) 0.062(7) 0.056(7) 0.005(5) -0.024(6) -0.008(5)
C2 0.103(10) 0.068(8) 0.083(9) -0.016(6) -0.044(8) 0.008(6)
C3 0.131(12) 0.065(9) 0.106(11) -0.025(7) -0.060(9) 0.014(8)
C4 0.148(12) 0.053(7) 0.106(11) 0.000(7) -0.070(9) -0.008(7)
C5 0.108(10) 0.060(7) 0.104(10) 0.001(6) -0.060(9) -0.014(6)
C6 0.089(8) 0.039(5) 0.068(8) 0.016(5) -0.042(6) -0.014(5)
C7 0.077(8) 0.057(6) 0.064(8) 0.005(5) -0.040(6) -0.015(5)
C8 0.059(7) 0.052(5) 0.047(6) -0.001(4) -0.018(5) -0.004(5)
C9 0.050(7) 0.063(6) 0.029(5) 0.003(4) -0.005(4) -0.014(5)
C10 0.069(8) 0.069(6) 0.037(6) -0.011(5) -0.009(5) 0.007(6)
C11 0.057(7) 0.039(5) 0.051(6) -0.003(4) -0.010(5) -0.007(5)
C12 0.050(7) 0.051(5) 0.045(6) -0.002(4) -0.008(5) -0.004(5)
C13 0.051(7) 0.045(5) 0.054(6) -0.008(5) -0.018(5) -0.006(5)
C14 0.064(7) 0.043(5) 0.053(6) 0.009(4) -0.015(5) -0.016(5)
C15 0.055(7) 0.051(5) 0.054(7) 0.008(5) -0.006(5) -0.004(5)
C16 0.086(10) 0.069(7) 0.081(9) -0.018(6) -0.016(7) -0.003(6)
C17 0.098(11) 0.064(7) 0.107(11) -0.014(7) -0.020(8) -0.009(7)
C18 0.089(11) 0.072(8) 0.131(13) -0.012(8) -0.033(9) 0.007(8)
C19 0.071(9) 0.082(8) 0.104(11) -0.005(7) -0.034(8) 0.008(7)
C20 0.051(7) 0.064(6) 0.065(7) 0.004(5) -0.011(5) -0.007(5)
C21 0.173(16) 0.061(9) 0.131(13) -0.018(8) -0.072(12) -0.007(10)
C22 0.148(16) 0.081(10) 0.196(18) -0.061(11) -0.067(14) 0.013(10)
C23 0.066(8) 0.061(7) 0.048(5) -0.010(5) -0.019(5) -0.001(5)
C24 0.090(10) 0.090(10) 0.060(7) -0.019(6) -0.028(7) -0.014(7)
C25 0.115(12) 0.107(11) 0.077(8) -0.030(7) -0.040(8) -0.023(8)
C26 0.076(9) 0.082(9) 0.083(8) -0.025(7) -0.035(7) 0.001(6)
C27 0.080(9) 0.063(8) 0.077(8) 0.006(6) -0.039(7) -0.016(6)
C28 0.063(8) 0.056(7) 0.057(5) -0.011(5) -0.017(5) -0.005(5)
C29 0.065(8) 0.077(8) 0.050(6) 0.011(6) -0.028(6) -0.017(6)
C30 0.069(8) 0.075(8) 0.039(4) 0.001(5) -0.019(5) -0.016(6)
C31 0.060(7) 0.068(8) 0.043(5) 0.009(5) -0.019(5) -0.012(5)
C32 0.081(9) 0.093(9) 0.050(5) 0.011(6) -0.022(6) -0.044(7)
C33 0.067(8) 0.082(8) 0.044(4) 0.012(5) -0.030(5) -0.020(6)
C34 0.072(8) 0.060(7) 0.031(4) 0.002(5) -0.017(5) -0.015(5)
C35 0.063(8) 0.071(8) 0.040(5) 0.001(5) -0.015(5) -0.022(6)
C36 0.069(8) 0.069(8) 0.047(5) 0.007(5) -0.027(5) -0.017(6)
C37 0.089(9) 0.058(7) 0.044(5) 0.004(5) -0.031(5) -0.011(6)
C38 0.097(10) 0.073(8) 0.050(6) 0.002(6) -0.034(6) -0.018(7)
C39 0.065(8) 0.066(7) 0.048(6) 0.000(5) -0.027(5) -0.002(5)
C40 0.086(9) 0.079(8) 0.037(6) -0.001(5) -0.035(6) -0.014(6)
C41 0.085(9) 0.087(8) 0.041(5) 0.004(6) -0.028(6) -0.023(7)
C42 0.071(8) 0.063(7) 0.042(5) 0.003(5) -0.034(5) -0.007(5)
C43 0.114(12) 0.109(11) 0.096(11) -0.021(8) -0.047(9) -0.023(8)
C44 0.098(10) 0.098(10) 0.070(9) 0.004(7) -0.045(8) -0.030(8)
C45 0.075(7) 0.076(6) 0.052(7) -0.001(5) -0.019(5) -0.025(6)
C46 0.082(9) 0.090(8) 0.090(10) 0.002(7) -0.018(7) -0.043(7)
C47 0.103(11) 0.094(9) 0.127(13) -0.001(9) -0.003(9) -0.049(8)
C48 0.102(10) 0.080(8) 0.156(15) -0.009(9) -0.013(9) -0.043(7)
C49 0.070(9) 0.069(7) 0.106(11) -0.016(7) 0.001(7) -0.023(6)
C50 0.067(7) 0.065(6) 0.060(7) -0.008(5) -0.019(5) -0.022(5)
C51 0.067(7) 0.063(6) 0.059(7) -0.011(6) -0.007(6) -0.018(5)
C52 0.051(5) 0.052(5) 0.046(6) 0.013(5) -0.022(5) -0.008(4)
C53 0.057(5) 0.055(5) 0.044(6) 0.007(5) -0.014(5) -0.004(4)
C54 0.061(5) 0.055(6) 0.040(6) 0.010(5) -0.013(5) -0.006(4)
C55 0.058(5) 0.066(6) 0.037(6) 0.003(5) -0.016(5) -0.015(4)
C56 0.052(5) 0.066(5) 0.025(5) 0.007(5) -0.007(5) -0.008(4)
C57 0.059(5) 0.049(6) 0.034(6) -0.003(5) -0.014(5) -0.006(4)
C58 0.059(5) 0.075(6) 0.028(6) -0.007(5) -0.017(5) -0.011(4)
C59 0.069(6) 0.083(6) 0.027(6) 0.006(5) -0.012(5) -0.023(5)
C60 0.067(7) 0.081(7) 0.069(8) 0.004(7) -0.018(6) -0.021(6)
C61 0.068(7) 0.107(8) 0.054(8) -0.001(7) -0.013(6) -0.033(6)
C62 0.072(9) 0.118(8) 0.074(9) -0.011(8) -0.002(7) -0.034(7)
C63 0.058(7) 0.112(8) 0.049(7) -0.008(7) -0.004(6) -0.019(6)
C64 0.061(6) 0.094(6) 0.038(7) -0.001(6) -0.006(5) -0.016(5)
C65 0.157(17) 0.079(9) 0.22(2) -0.023(12) -0.020(15) -0.057(10)
C66 0.091(12) 0.109(9) 0.160(16) -0.005(11) -0.016(11) -0.032(9)

#==============================================================================
_computing_data_collection
                                'MSC/AFC Diffractometer Control (Rigaku, 1998)'
_computing_cell_refinement
                                               'MSC/AFC Diffractometer Control'
_computing_data_reduction
                                               'MSC/AFC Diffractometer Control'
_computing_structure_solution
                                               'SIR92 (Altomare, et al., 1994)'
_computing_structure_refinement
                                      'SHELXL Version 2016/6 (Sheldrick, 2008)'
_computing_publication_material
                                          'CrystalStructure 4.3 (Rigaku, 2018)'
_computing_molecular_graphics                     'CrystalStructure 4.3'

#==============================================================================
# MOLECULAR GEOMETRY

_geom_special_details
;
 All esds (except the esd in the dihedral angle between two l.s. planes)
 are estimated using the full covariance matrix.  The cell esds are taken
 into account individually in the estimation of esds in distances, angles
 and torsion angles; correlations between esds in cell parameters are only
 used when they are defined by crystal symmetry.  An approximate (isotropic)
 treatment of cell esds is used for estimating esds involving l.s. planes.
;

loop_
 _geom_bond_atom_site_label_1
 _geom_bond_atom_site_label_2
 _geom_bond_distance
 _geom_bond_site_symmetry_2
 _geom_bond_publ_flag
V1 O13 1.582(8) . ?
V1 O8 1.840(7) . ?
V1 O1 1.887(8) . ?
V1 O2 1.901(8) . ?
V1 N1 2.100(9) . ?
V1 N4 2.334(9) . ?
V2 O14 1.622(8) . ?
V2 O12 1.819(8) . ?
V2 O5 1.860(8) . ?
V2 O6 1.930(8) . ?
V2 N3 2.113(9) . ?
V2 N6 2.378(9) . ?
V3 O15 1.596(8) . ?
V3 O4 1.845(8) . ?
V3 O9 1.847(8) . ?
V3 O10 1.908(7) . ?
V3 N5 2.119(9) . ?
V3 N2 2.366(9) . ?
O1 C1 1.360(13) . ?
O2 C9 1.353(12) . ?
O3 C11 1.347(12) . ?
O3 C14 1.390(13) . ?
O4 C20 1.302(13) . ?
O5 C23 1.296(13) . ?
O6 C31 1.346(12) . ?
O7 C36 1.340(12) . ?
O7 C33 1.384(12) . ?
O8 C42 1.331(12) . ?
O9 C45 1.329(12) . ?
O10 C53 1.349(12) . ?
O11 C55 1.380(12) . ?
O11 C58 1.382(12) . ?
O12 C64 1.353(13) . ?
N1 C7 1.312(12) . ?
N1 C8 1.438(13) . ?
N2 C14 1.289(12) . ?
N2 C12 1.386(13) . ?
N3 C29 1.316(13) . ?
N3 C30 1.426(13) . ?
N4 C36 1.310(13) . ?
N4 C34 1.400(12) . ?
N5 C51 1.291(12) . ?
N5 C52 1.430(12) . ?
N6 C58 1.278(13) . ?
N6 C56 1.385(13) . ?
N7 C68 1.234(16) . ?
N8 C70 1.229(18) . ?
C1 C2 1.376(16) . ?
C1 C6 1.393(16) . ?
C2 C3 1.360(16) . ?
C2 H2 0.9300 . ?
C3 C4 1.400(19) . ?
C3 H3 0.9300 . ?
C4 C5 1.402(18) . ?
C4 C21 1.536(18) . ?
C5 C6 1.413(15) . ?
C5 H5 0.9300 . ?
C6 C7 1.405(15) . ?
C7 H7 0.9300 . ?
C8 C13 1.389(14) . ?
C8 C9 1.427(14) . ?
C9 C10 1.399(14) . ?
C10 C11 1.363(15) . ?
C10 H10 0.9300 . ?
C11 C12 1.380(14) . ?
C12 C13 1.390(13) . ?
C13 H13 0.9300 . ?
C14 C15 1.453(15) . ?
C15 C20 1.390(16) . ?
C15 C16 1.442(15) . ?
C16 C17 1.394(18) . ?
C16 H16 0.9300 . ?
C17 C18 1.401(19) . ?
C17 C22 1.448(17) . ?
C18 C19 1.374(17) . ?
C18 H18 0.9300 . ?
C19 C20 1.403(16) . ?
C19 H19 0.9300 . ?
C21 H21A 0.9600 . ?
C21 H21B 0.9600 . ?
C21 H21C 0.9600 . ?
C22 H22A 0.9600 . ?
C22 H22B 0.9600 . ?
C22 H22C 0.9600 . ?
C23 C24 1.398(15) . ?
C23 C28 1.435(15) . ?
C24 C25 1.343(17) . ?
C24 H24 0.9300 . ?
C25 C26 1.448(19) . ?
C25 H25 0.9300 . ?
C26 C27 1.399(16) . ?
C26 C43 1.566(17) . ?
C27 C28 1.377(15) . ?
C27 H27 0.9300 . ?
C28 C29 1.395(14) . ?
C29 H29 0.9300 . ?
C30 C35 1.375(14) . ?
C30 C31 1.412(15) . ?
C31 C32 1.425(15) . ?
C32 C33 1.337(14) . ?
C32 H32 0.9300 . ?
C33 C34 1.366(14) . ?
C34 C35 1.380(14) . ?
C35 H35 0.9300 . ?
C36 C37 1.474(15) . ?
C37 C38 1.373(15) . ?
C37 C42 1.416(15) . ?
C38 C39 1.378(14) . ?
C38 H38 0.9300 . ?
C39 C40 1.360(15) . ?
C39 C44 1.510(15) . ?
C40 C41 1.379(15) . ?
C40 H40 0.9300 . ?
C41 C42 1.406(14) . ?
C41 H41 0.9300 . ?
C43 H43A 0.9600 . ?
C43 H43B 0.9600 . ?
C43 H43C 0.9600 . ?
C44 H44A 0.9600 . ?
C44 H44B 0.9600 . ?
C44 H44C 0.9600 . ?
C45 C50 1.409(16) . ?
C45 C46 1.420(16) . ?
C46 C47 1.388(18) . ?
C46 H46 0.9300 . ?
C47 C48 1.43(2) . ?
C47 H47 0.9300 . ?
C48 C49 1.373(17) . ?
C48 C65 1.506(18) . ?
C49 C50 1.438(15) . ?
C49 H49 0.9300 . ?
C50 C51 1.442(15) . ?
C51 H51 0.9300 . ?
C52 C57 1.391(14) . ?
C52 C53 1.405(14) . ?
C53 C54 1.395(14) . ?
C54 C55 1.376(14) . ?
C54 H54 0.9300 . ?
C55 C56 1.394(14) . ?
C56 C57 1.420(14) . ?
C57 H57 0.9300 . ?
C58 C59 1.474(15) . ?
C59 C60 1.374(15) . ?
C59 C64 1.435(16) . ?
C60 C61 1.382(16) . ?
C60 H60 0.9300 . ?
C61 C62 1.367(18) . ?
C61 C66 1.519(17) . ?
C62 C63 1.348(17) . ?
C62 H62 0.9300 . ?
C63 C64 1.396(16) . ?
C63 H63 0.9300 . ?
C65 H65A 0.9600 . ?
C65 H65B 0.9600 . ?
C65 H65C 0.9600 . ?
C66 H66A 0.9600 . ?
C66 H66B 0.9600 . ?
C66 H66C 0.9600 . ?
C67 C68 1.522(16) . ?
C67 H67A 0.9600 . ?
C67 H67B 0.9600 . ?
C67 H67C 0.9600 . ?
C69 C70 1.525(18) . ?
C69 H69A 0.9600 . ?
C69 H69B 0.9600 . ?
C69 H69C 0.9600 . ?

loop_
 _geom_angle_atom_site_label_1
 _geom_angle_atom_site_label_2
 _geom_angle_atom_site_label_3
 _geom_angle
 _geom_angle_site_symmetry_1
 _geom_angle_site_symmetry_3
 _geom_angle_publ_flag
O13 V1 O8 97.8(4) . . ?
O13 V1 O1 95.9(4) . . ?
O8 V1 O1 106.6(3) . . ?
O13 V1 O2 104.1(4) . . ?
O8 V1 O2 87.5(3) . . ?
O1 V1 O2 153.8(3) . . ?
O13 V1 N1 94.2(4) . . ?
O8 V1 N1 163.0(3) . . ?
O1 V1 N1 84.1(3) . . ?
O2 V1 N1 77.9(3) . . ?
O13 V1 N4 172.0(4) . . ?
O8 V1 N4 81.8(3) . . ?
O1 V1 N4 76.6(3) . . ?
O2 V1 N4 83.9(3) . . ?
N1 V1 N4 88.1(3) . . ?
O14 V2 O12 100.4(4) . . ?
O14 V2 O5 98.0(4) . . ?
O12 V2 O5 105.7(3) . . ?
O14 V2 O6 101.3(4) . . ?
O12 V2 O6 86.5(3) . . ?
O5 V2 O6 154.9(4) . . ?
O14 V2 N3 92.0(4) . . ?
O12 V2 N3 162.3(4) . . ?
O5 V2 N3 84.7(3) . . ?
O6 V2 N3 78.7(3) . . ?
O14 V2 N6 177.8(4) . . ?
O12 V2 N6 81.0(3) . . ?
O5 V2 N6 79.9(3) . . ?
O6 V2 N6 80.4(3) . . ?
N3 V2 N6 87.1(3) . . ?
O15 V3 O4 98.2(4) . . ?
O15 V3 O9 95.9(4) . . ?
O4 V3 O9 107.1(3) . . ?
O15 V3 O10 104.2(4) . . ?
O4 V3 O10 88.7(3) . . ?
O9 V3 O10 152.5(3) . . ?
O15 V3 N5 92.0(4) . . ?
O4 V3 N5 164.8(4) . . ?
O9 V3 N5 82.9(3) . . ?
O10 V3 N5 77.9(3) . . ?
O15 V3 N2 172.6(4) . . ?
O4 V3 N2 80.6(3) . . ?
O9 V3 N2 77.6(3) . . ?
O10 V3 N2 83.0(3) . . ?
N5 V3 N2 90.8(3) . . ?
C1 O1 V1 129.9(8) . . ?
C9 O2 V1 121.3(6) . . ?
C11 O3 C14 105.0(8) . . ?
C20 O4 V3 137.6(8) . . ?
C23 O5 V2 132.4(8) . . ?
C31 O6 V2 118.6(7) . . ?
C36 O7 C33 104.3(8) . . ?
C42 O8 V1 134.6(7) . . ?
C45 O9 V3 132.3(7) . . ?
C53 O10 V3 121.1(7) . . ?
C55 O11 C58 103.6(8) . . ?
C64 O12 V2 136.6(7) . . ?
C7 N1 C8 121.5(9) . . ?
C7 N1 V1 123.9(8) . . ?
C8 N1 V1 114.3(7) . . ?
C14 N2 C12 105.0(9) . . ?
C14 N2 V3 120.9(8) . . ?
C12 N2 V3 134.0(7) . . ?
C29 N3 C30 121.7(9) . . ?
C29 N3 V2 124.8(7) . . ?
C30 N3 V2 113.3(7) . . ?
C36 N4 C34 103.8(9) . . ?
C36 N4 V1 121.5(7) . . ?
C34 N4 V1 134.6(7) . . ?
C51 N5 C52 119.4(9) . . ?
C51 N5 V3 126.7(8) . . ?
C52 N5 V3 112.9(7) . . ?
C58 N6 C56 104.6(10) . . ?
C58 N6 V2 120.0(8) . . ?
C56 N6 V2 135.0(8) . . ?
O1 C1 C2 119.2(12) . . ?
O1 C1 C6 119.7(11) . . ?
C2 C1 C6 120.7(12) . . ?
C3 C2 C1 121.1(14) . . ?
C3 C2 H2 119.4 . . ?
C1 C2 H2 119.4 . . ?
C2 C3 C4 121.2(14) . . ?
C2 C3 H3 119.4 . . ?
C4 C3 H3 119.4 . . ?
C3 C4 C5 117.6(13) . . ?
C3 C4 C21 120.8(14) . . ?
C5 C4 C21 121.5(14) . . ?
C4 C5 C6 121.6(13) . . ?
C4 C5 H5 119.2 . . ?
C6 C5 H5 119.2 . . ?
C1 C6 C7 124.3(11) . . ?
C1 C6 C5 117.8(12) . . ?
C7 C6 C5 117.4(12) . . ?
N1 C7 C6 124.3(11) . . ?
N1 C7 H7 117.8 . . ?
C6 C7 H7 117.8 . . ?
C13 C8 C9 122.6(10) . . ?
C13 C8 N1 127.4(9) . . ?
C9 C8 N1 110.0(9) . . ?
O2 C9 C10 123.9(10) . . ?
O2 C9 C8 116.1(9) . . ?
C10 C9 C8 119.9(10) . . ?
C11 C10 C9 115.3(10) . . ?
C11 C10 H10 122.3 . . ?
C9 C10 H10 122.3 . . ?
O3 C11 C10 126.5(10) . . ?
O3 C11 C12 107.4(10) . . ?
C10 C11 C12 125.9(11) . . ?
C11 C12 N2 109.1(10) . . ?
C11 C12 C13 119.8(11) . . ?
N2 C12 C13 131.1(10) . . ?
C8 C13 C12 116.4(10) . . ?
C8 C13 H13 121.8 . . ?
C12 C13 H13 121.8 . . ?
N2 C14 O3 113.4(10) . . ?
N2 C14 C15 127.6(11) . . ?
O3 C14 C15 119.0(10) . . ?
C20 C15 C16 119.9(12) . . ?
C20 C15 C14 120.8(11) . . ?
C16 C15 C14 119.2(12) . . ?
C17 C16 C15 122.0(14) . . ?
C17 C16 H16 119.0 . . ?
C15 C16 H16 119.0 . . ?
C16 C17 C18 114.6(13) . . ?
C16 C17 C22 120.3(16) . . ?
C18 C17 C22 125.1(16) . . ?
C19 C18 C17 125.5(15) . . ?
C19 C18 H18 117.2 . . ?
C17 C18 H18 117.2 . . ?
C18 C19 C20 119.2(14) . . ?
C18 C19 H19 120.4 . . ?
C20 C19 H19 120.4 . . ?
O4 C20 C15 123.5(11) . . ?
O4 C20 C19 117.7(12) . . ?
C15 C20 C19 118.7(12) . . ?
C4 C21 H21A 109.5 . . ?
C4 C21 H21B 109.5 . . ?
H21A C21 H21B 109.5 . . ?
C4 C21 H21C 109.5 . . ?
H21A C21 H21C 109.5 . . ?
H21B C21 H21C 109.5 . . ?
C17 C22 H22A 109.5 . . ?
C17 C22 H22B 109.5 . . ?
H22A C22 H22B 109.5 . . ?
C17 C22 H22C 109.5 . . ?
H22A C22 H22C 109.5 . . ?
H22B C22 H22C 109.5 . . ?
O5 C23 C24 118.7(11) . . ?
O5 C23 C28 122.3(10) . . ?
C24 C23 C28 118.9(12) . . ?
C25 C24 C23 120.5(13) . . ?
C25 C24 H24 119.8 . . ?
C23 C24 H24 119.8 . . ?
C24 C25 C26 123.2(13) . . ?
C24 C25 H25 118.4 . . ?
C26 C25 H25 118.4 . . ?
C27 C26 C25 114.7(13) . . ?
C27 C26 C43 123.1(13) . . ?
C25 C26 C43 122.2(12) . . ?
C28 C27 C26 123.6(12) . . ?
C28 C27 H27 118.2 . . ?
C26 C27 H27 118.2 . . ?
C27 C28 C29 119.1(11) . . ?
C27 C28 C23 118.8(11) . . ?
C29 C28 C23 121.7(11) . . ?
N3 C29 C28 124.8(11) . . ?
N3 C29 H29 117.6 . . ?
C28 C29 H29 117.6 . . ?
C35 C30 C31 121.9(10) . . ?
C35 C30 N3 127.2(10) . . ?
C31 C30 N3 110.9(9) . . ?
O6 C31 C30 118.5(10) . . ?
O6 C31 C32 121.3(10) . . ?
C30 C31 C32 120.2(10) . . ?
C33 C32 C31 114.8(11) . . ?
C33 C32 H32 122.6 . . ?
C31 C32 H32 122.6 . . ?
C32 C33 C34 125.7(11) . . ?
C32 C33 O7 126.5(11) . . ?
C34 C33 O7 107.8(9) . . ?
C33 C34 C35 120.9(10) . . ?
C33 C34 N4 108.7(9) . . ?
C35 C34 N4 130.4(10) . . ?
C30 C35 C34 116.5(10) . . ?
C30 C35 H35 121.8 . . ?
C34 C35 H35 121.8 . . ?
N4 C36 O7 115.3(10) . . ?
N4 C36 C37 128.3(11) . . ?
O7 C36 C37 116.2(10) . . ?
C38 C37 C42 121.2(10) . . ?
C38 C37 C36 121.4(11) . . ?
C42 C37 C36 117.4(10) . . ?
C37 C38 C39 121.8(12) . . ?
C37 C38 H38 119.1 . . ?
C39 C38 H38 119.1 . . ?
C40 C39 C38 117.9(11) . . ?
C40 C39 C44 121.7(10) . . ?
C38 C39 C44 120.4(11) . . ?
C39 C40 C41 122.3(10) . . ?
C39 C40 H40 118.9 . . ?
C41 C40 H40 118.9 . . ?
C40 C41 C42 121.1(11) . . ?
C40 C41 H41 119.5 . . ?
C42 C41 H41 119.5 . . ?
O8 C42 C41 117.8(10) . . ?
O8 C42 C37 126.3(10) . . ?
C41 C42 C37 115.8(11) . . ?
C26 C43 H43A 109.5 . . ?
C26 C43 H43B 109.5 . . ?
H43A C43 H43B 109.5 . . ?
C26 C43 H43C 109.5 . . ?
H43A C43 H43C 109.5 . . ?
H43B C43 H43C 109.5 . . ?
C39 C44 H44A 109.5 . . ?
C39 C44 H44B 109.5 . . ?
H44A C44 H44B 109.5 . . ?
C39 C44 H44C 109.5 . . ?
H44A C44 H44C 109.5 . . ?
H44B C44 H44C 109.5 . . ?
O9 C45 C50 120.0(11) . . ?
O9 C45 C46 119.9(11) . . ?
C50 C45 C46 120.0(12) . . ?
C47 C46 C45 118.9(14) . . ?
C47 C46 H46 120.6 . . ?
C45 C46 H46 120.6 . . ?
C46 C47 C48 122.7(14) . . ?
C46 C47 H47 118.6 . . ?
C48 C47 H47 118.6 . . ?
C49 C48 C47 117.4(14) . . ?
C49 C48 C65 122.1(15) . . ?
C47 C48 C65 120.5(14) . . ?
C48 C49 C50 122.2(13) . . ?
C48 C49 H49 118.9 . . ?
C50 C49 H49 118.9 . . ?
C45 C50 C49 118.7(11) . . ?
C45 C50 C51 123.6(11) . . ?
C49 C50 C51 117.5(11) . . ?
N5 C51 C50 121.5(11) . . ?
N5 C51 H51 119.3 . . ?
C50 C51 H51 119.3 . . ?
C57 C52 C53 122.4(10) . . ?
C57 C52 N5 125.9(10) . . ?
C53 C52 N5 111.7(9) . . ?
O10 C53 C54 121.9(10) . . ?
O10 C53 C52 116.4(10) . . ?
C54 C53 C52 121.7(10) . . ?
C55 C54 C53 114.8(10) . . ?
C55 C54 H54 122.6 . . ?
C53 C54 H54 122.6 . . ?
C54 C55 O11 127.6(10) . . ?
C54 C55 C56 125.6(11) . . ?
O11 C55 C56 106.8(10) . . ?
N6 C56 C55 109.4(10) . . ?
N6 C56 C57 131.8(10) . . ?
C55 C56 C57 118.9(10) . . ?
C52 C57 C56 116.4(10) . . ?
C52 C57 H57 121.8 . . ?
C56 C57 H57 121.8 . . ?
N6 C58 O11 115.6(10) . . ?
N6 C58 C59 129.9(11) . . ?
O11 C58 C59 114.4(10) . . ?
C60 C59 C64 120.0(12) . . ?
C60 C59 C58 122.0(11) . . ?
C64 C59 C58 117.9(11) . . ?
C59 C60 C61 120.8(13) . . ?
C59 C60 H60 119.6 . . ?
C61 C60 H60 119.6 . . ?
C62 C61 C60 118.0(13) . . ?
C62 C61 C66 119.1(13) . . ?
C60 C61 C66 122.8(13) . . ?
C63 C62 C61 123.9(14) . . ?
C63 C62 H62 118.0 . . ?
C61 C62 H62 118.0 . . ?
C62 C63 C64 119.5(13) . . ?
C62 C63 H63 120.3 . . ?
C64 C63 H63 120.3 . . ?
O12 C64 C63 119.1(12) . . ?
O12 C64 C59 123.2(11) . . ?
C63 C64 C59 117.7(12) . . ?
C48 C65 H65A 109.5 . . ?
C48 C65 H65B 109.5 . . ?
H65A C65 H65B 109.5 . . ?
C48 C65 H65C 109.5 . . ?
H65A C65 H65C 109.5 . . ?
H65B C65 H65C 109.5 . . ?
C61 C66 H66A 109.5 . . ?
C61 C66 H66B 109.5 . . ?
H66A C66 H66B 109.5 . . ?
C61 C66 H66C 109.5 . . ?
H66A C66 H66C 109.5 . . ?
H66B C66 H66C 109.5 . . ?
C68 C67 H67A 109.5 . . ?
C68 C67 H67B 109.5 . . ?
H67A C67 H67B 109.5 . . ?
C68 C67 H67C 109.5 . . ?
H67A C67 H67C 109.5 . . ?
H67B C67 H67C 109.5 . . ?
N7 C68 C67 166(3) . . ?
C70 C69 H69A 109.5 . . ?
C70 C69 H69B 109.5 . . ?
H69A C69 H69B 109.5 . . ?
C70 C69 H69C 109.5 . . ?
H69A C69 H69C 109.5 . . ?
H69B C69 H69C 109.5 . . ?
N8 C70 C69 158(4) . . ?

loop_
 _geom_torsion_atom_site_label_1
 _geom_torsion_atom_site_label_2
 _geom_torsion_atom_site_label_3
 _geom_torsion_atom_site_label_4
 _geom_torsion
 _geom_torsion_site_symmetry_1
 _geom_torsion_site_symmetry_2
 _geom_torsion_site_symmetry_3
 _geom_torsion_site_symmetry_4
 _geom_torsion_publ_flag
O13 V1 O1 C1 52.9(9) . . . . ?
O8 V1 O1 C1 152.9(9) . . . . ?
O2 V1 O1 C1 -87.1(12) . . . . ?
N1 V1 O1 C1 -40.7(9) . . . . ?
N4 V1 O1 C1 -130.1(9) . . . . ?
O15 V3 O4 C20 -151.0(11) . . . . ?
O9 V3 O4 C20 110.2(11) . . . . ?
O10 V3 O4 C20 -46.8(11) . . . . ?
N5 V3 O4 C20 -20(2) . . . . ?
N2 V3 O4 C20 36.4(11) . . . . ?
O14 V2 O5 C23 56.8(10) . . . . ?
O12 V2 O5 C23 160.0(10) . . . . ?
O6 V2 O5 C23 -83.3(13) . . . . ?
N3 V2 O5 C23 -34.5(10) . . . . ?
N6 V2 O5 C23 -122.4(10) . . . . ?
O13 V1 O8 C42 -150.8(10) . . . . ?
O1 V1 O8 C42 110.6(10) . . . . ?
O2 V1 O8 C42 -46.9(10) . . . . ?
N1 V1 O8 C42 -16.7(18) . . . . ?
N4 V1 O8 C42 37.3(10) . . . . ?
O15 V3 O9 C45 50.5(11) . . . . ?
O4 V3 O9 C45 151.0(10) . . . . ?
O10 V3 O9 C45 -86.7(12) . . . . ?
N5 V3 O9 C45 -40.7(10) . . . . ?
N2 V3 O9 C45 -133.1(11) . . . . ?
O14 V2 O12 C64 -141.7(11) . . . . ?
O5 V2 O12 C64 116.9(11) . . . . ?
O6 V2 O12 C64 -40.8(11) . . . . ?
N3 V2 O12 C64 -7.9(19) . . . . ?
N6 V2 O12 C64 40.1(11) . . . . ?
V1 O1 C1 C2 -154.8(9) . . . . ?
V1 O1 C1 C6 31.9(15) . . . . ?
O1 C1 C2 C3 -172.7(12) . . . . ?
C6 C1 C2 C3 1(2) . . . . ?
C1 C2 C3 C4 -2(2) . . . . ?
C2 C3 C4 C5 2(2) . . . . ?
C2 C3 C4 C21 178.7(14) . . . . ?
C3 C4 C5 C6 -2(2) . . . . ?
C21 C4 C5 C6 -178.6(13) . . . . ?
O1 C1 C6 C7 1.9(18) . . . . ?
C2 C1 C6 C7 -171.3(12) . . . . ?
O1 C1 C6 C5 172.8(10) . . . . ?
C2 C1 C6 C5 -0.4(18) . . . . ?
C4 C5 C6 C1 1.3(19) . . . . ?
C4 C5 C6 C7 172.8(13) . . . . ?
C8 N1 C7 C6 171.6(10) . . . . ?
V1 N1 C7 C6 -16.2(15) . . . . ?
C1 C6 C7 N1 -7.2(19) . . . . ?
C5 C6 C7 N1 -178.2(11) . . . . ?
C7 N1 C8 C13 -13.7(16) . . . . ?
V1 N1 C8 C13 173.4(9) . . . . ?
C7 N1 C8 C9 169.2(9) . . . . ?
V1 N1 C8 C9 -3.7(10) . . . . ?
V1 O2 C9 C10 -174.7(8) . . . . ?
V1 O2 C9 C8 6.3(12) . . . . ?
C13 C8 C9 O2 -178.3(9) . . . . ?
N1 C8 C9 O2 -1.1(13) . . . . ?
C13 C8 C9 C10 2.6(16) . . . . ?
N1 C8 C9 C10 179.9(9) . . . . ?
O2 C9 C10 C11 179.3(10) . . . . ?
C8 C9 C10 C11 -1.8(15) . . . . ?
C14 O3 C11 C10 178.0(11) . . . . ?
C14 O3 C11 C12 1.1(11) . . . . ?
C9 C10 C11 O3 -177.1(10) . . . . ?
C9 C10 C11 C12 -0.7(17) . . . . ?
O3 C11 C12 N2 -0.4(12) . . . . ?
C10 C11 C12 N2 -177.3(10) . . . . ?
O3 C11 C12 C13 179.5(9) . . . . ?
C10 C11 C12 C13 2.6(17) . . . . ?
C14 N2 C12 C11 -0.5(12) . . . . ?
V3 N2 C12 C11 175.7(7) . . . . ?
C14 N2 C12 C13 179.6(11) . . . . ?
V3 N2 C12 C13 -4.3(17) . . . . ?
C9 C8 C13 C12 -0.8(15) . . . . ?
N1 C8 C13 C12 -177.6(10) . . . . ?
C11 C12 C13 C8 -1.7(15) . . . . ?
N2 C12 C13 C8 178.2(10) . . . . ?
C12 N2 C14 O3 1.3(12) . . . . ?
V3 N2 C14 O3 -175.5(6) . . . . ?
C12 N2 C14 C15 -177.7(10) . . . . ?
V3 N2 C14 C15 5.5(15) . . . . ?
C11 O3 C14 N2 -1.6(12) . . . . ?
C11 O3 C14 C15 177.6(9) . . . . ?
N2 C14 C15 C20 7.2(18) . . . . ?
O3 C14 C15 C20 -171.7(10) . . . . ?
N2 C14 C15 C16 -173.4(11) . . . . ?
O3 C14 C15 C16 7.6(15) . . . . ?
C20 C15 C16 C17 -0.9(19) . . . . ?
C14 C15 C16 C17 179.7(12) . . . . ?
C15 C16 C17 C18 1(2) . . . . ?
C15 C16 C17 C22 -177.7(13) . . . . ?
C16 C17 C18 C19 -1(2) . . . . ?
C22 C17 C18 C19 178.1(15) . . . . ?
C17 C18 C19 C20 0(2) . . . . ?
V3 O4 C20 C15 -35.1(17) . . . . ?
V3 O4 C20 C19 148.0(10) . . . . ?
C16 C15 C20 O4 -176.9(10) . . . . ?
C14 C15 C20 O4 2.4(17) . . . . ?
C16 C15 C20 C19 -0.1(17) . . . . ?
C14 C15 C20 C19 179.3(11) . . . . ?
C18 C19 C20 O4 177.6(12) . . . . ?
C18 C19 C20 C15 0.5(19) . . . . ?
V2 O5 C23 C24 -154.8(9) . . . . ?
V2 O5 C23 C28 28.3(16) . . . . ?
O5 C23 C24 C25 -176.1(12) . . . . ?
C28 C23 C24 C25 0.9(19) . . . . ?
C23 C24 C25 C26 4(2) . . . . ?
C24 C25 C26 C27 -6(2) . . . . ?
C24 C25 C26 C43 175.4(14) . . . . ?
C25 C26 C27 C28 4.8(18) . . . . ?
C43 C26 C27 C28 -176.8(12) . . . . ?
C26 C27 C28 C29 172.2(11) . . . . ?
C26 C27 C28 C23 -0.8(18) . . . . ?
O5 C23 C28 C27 174.6(11) . . . . ?
C24 C23 C28 C27 -2.2(17) . . . . ?
O5 C23 C28 C29 1.8(18) . . . . ?
C24 C23 C28 C29 -175.1(11) . . . . ?
C30 N3 C29 C28 175.6(10) . . . . ?
V2 N3 C29 C28 -9.2(16) . . . . ?
C27 C28 C29 N3 178.4(11) . . . . ?
C23 C28 C29 N3 -8.8(18) . . . . ?
C29 N3 C30 C35 -2.9(18) . . . . ?
V2 N3 C30 C35 -178.6(10) . . . . ?
C29 N3 C30 C31 175.4(10) . . . . ?
V2 N3 C30 C31 -0.3(12) . . . . ?
V2 O6 C31 C30 0.4(14) . . . . ?
V2 O6 C31 C32 -179.9(8) . . . . ?
C35 C30 C31 O6 178.4(10) . . . . ?
N3 C30 C31 O6 0.0(15) . . . . ?
C35 C30 C31 C32 -1.3(18) . . . . ?
N3 C30 C31 C32 -179.8(10) . . . . ?
O6 C31 C32 C33 -179.8(11) . . . . ?
C30 C31 C32 C33 -0.1(17) . . . . ?
C31 C32 C33 C34 1.2(19) . . . . ?
C31 C32 C33 O7 179.6(10) . . . . ?
C36 O7 C33 C32 -179.8(12) . . . . ?
C36 O7 C33 C34 -1.1(12) . . . . ?
C32 C33 C34 C35 -1(2) . . . . ?
O7 C33 C34 C35 -179.6(10) . . . . ?
C32 C33 C34 N4 -179.8(12) . . . . ?
O7 C33 C34 N4 1.5(13) . . . . ?
C36 N4 C34 C33 -1.3(13) . . . . ?
V1 N4 C34 C33 -179.4(8) . . . . ?
C36 N4 C34 C35 179.9(12) . . . . ?
V1 N4 C34 C35 1.8(19) . . . . ?
C31 C30 C35 C34 1.7(17) . . . . ?
N3 C30 C35 C34 179.8(10) . . . . ?
C33 C34 C35 C30 -0.6(17) . . . . ?
N4 C34 C35 C30 178.1(11) . . . . ?
C34 N4 C36 O7 0.6(13) . . . . ?
V1 N4 C36 O7 179.0(7) . . . . ?
C34 N4 C36 C37 -173.4(11) . . . . ?
V1 N4 C36 C37 5.0(17) . . . . ?
C33 O7 C36 N4 0.3(13) . . . . ?
C33 O7 C36 C37 175.1(10) . . . . ?
N4 C36 C37 C38 -171.3(12) . . . . ?
O7 C36 C37 C38 14.8(17) . . . . ?
N4 C36 C37 C42 9.2(19) . . . . ?
O7 C36 C37 C42 -164.7(10) . . . . ?
C42 C37 C38 C39 1.8(19) . . . . ?
C36 C37 C38 C39 -177.7(11) . . . . ?
C37 C38 C39 C40 -1.1(18) . . . . ?
C37 C38 C39 C44 176.9(12) . . . . ?
C38 C39 C40 C41 -0.7(18) . . . . ?
C44 C39 C40 C41 -178.6(12) . . . . ?
C39 C40 C41 C42 1.7(19) . . . . ?
V1 O8 C42 C41 147.4(9) . . . . ?
V1 O8 C42 C37 -35.5(17) . . . . ?
C40 C41 C42 O8 176.5(11) . . . . ?
C40 C41 C42 C37 -0.9(17) . . . . ?
C38 C37 C42 O8 -178.0(11) . . . . ?
C36 C37 C42 O8 1.5(18) . . . . ?
C38 C37 C42 C41 -0.8(17) . . . . ?
C36 C37 C42 C41 178.7(10) . . . . ?
V3 O9 C45 C50 33.5(17) . . . . ?
V3 O9 C45 C46 -147.4(10) . . . . ?
O9 C45 C46 C47 -178.1(13) . . . . ?
C50 C45 C46 C47 1(2) . . . . ?
C45 C46 C47 C48 3(3) . . . . ?
C46 C47 C48 C49 -4(3) . . . . ?
C46 C47 C48 C65 177.4(17) . . . . ?
C47 C48 C49 C50 2(3) . . . . ?
C65 C48 C49 C50 -179.6(16) . . . . ?
O9 C45 C50 C49 176.1(11) . . . . ?
C46 C45 C50 C49 -3.1(19) . . . . ?
O9 C45 C50 C51 1.1(19) . . . . ?
C46 C45 C50 C51 -178.0(12) . . . . ?
C48 C49 C50 C45 2(2) . . . . ?
C48 C49 C50 C51 176.8(15) . . . . ?
C52 N5 C51 C50 177.6(10) . . . . ?
V3 N5 C51 C50 -14.5(16) . . . . ?
C45 C50 C51 N5 -7.3(19) . . . . ?
C49 C50 C51 N5 177.7(11) . . . . ?
C51 N5 C52 C57 -10.1(15) . . . . ?
V3 N5 C52 C57 -179.6(8) . . . . ?
C51 N5 C52 C53 169.7(10) . . . . ?
V3 N5 C52 C53 0.2(10) . . . . ?
V3 O10 C53 C54 177.2(8) . . . . ?
V3 O10 C53 C52 -2.3(12) . . . . ?
C57 C52 C53 O10 -179.0(9) . . . . ?
N5 C52 C53 O10 1.2(13) . . . . ?
C57 C52 C53 C54 1.5(16) . . . . ?
N5 C52 C53 C54 -178.3(9) . . . . ?
O10 C53 C54 C55 177.0(9) . . . . ?
C52 C53 C54 C55 -3.6(15) . . . . ?
C53 C54 C55 O11 -176.3(10) . . . . ?
C53 C54 C55 C56 2.6(16) . . . . ?
C58 O11 C55 C54 179.7(10) . . . . ?
C58 O11 C55 C56 0.6(10) . . . . ?
C58 N6 C56 C55 -1.5(11) . . . . ?
V2 N6 C56 C55 171.1(7) . . . . ?
C58 N6 C56 C57 179.5(10) . . . . ?
V2 N6 C56 C57 -8.0(17) . . . . ?
C54 C55 C56 N6 -178.6(10) . . . . ?
O11 C55 C56 N6 0.5(11) . . . . ?
C54 C55 C56 C57 0.6(16) . . . . ?
O11 C55 C56 C57 179.7(8) . . . . ?
C53 C52 C57 C56 1.8(15) . . . . ?
N5 C52 C57 C56 -178.5(9) . . . . ?
N6 C56 C57 C52 176.2(10) . . . . ?
C55 C56 C57 C52 -2.8(14) . . . . ?
C56 N6 C58 O11 2.0(12) . . . . ?
V2 N6 C58 O11 -171.9(6) . . . . ?
C56 N6 C58 C59 178.5(10) . . . . ?
V2 N6 C58 C59 4.6(15) . . . . ?
C55 O11 C58 N6 -1.7(11) . . . . ?
C55 O11 C58 C59 -178.8(8) . . . . ?
N6 C58 C59 C60 -172.4(11) . . . . ?
O11 C58 C59 C60 4.1(14) . . . . ?
N6 C58 C59 C64 12.4(17) . . . . ?
O11 C58 C59 C64 -171.0(9) . . . . ?
C64 C59 C60 C61 -2.7(18) . . . . ?
C58 C59 C60 C61 -177.8(11) . . . . ?
C59 C60 C61 C62 3.0(19) . . . . ?
C59 C60 C61 C66 -177.5(13) . . . . ?
C60 C61 C62 C63 -2(2) . . . . ?
C66 C61 C62 C63 178.1(14) . . . . ?
C61 C62 C63 C64 2(2) . . . . ?
V2 O12 C64 C63 145.0(9) . . . . ?
V2 O12 C64 C59 -35.4(18) . . . . ?
C62 C63 C64 O12 178.5(12) . . . . ?
C62 C63 C64 C59 -1.1(18) . . . . ?
C60 C59 C64 O12 -177.8(10) . . . . ?
C58 C59 C64 O12 -2.6(16) . . . . ?
C60 C59 C64 C63 1.8(17) . . . . ?
C58 C59 C64 C63 177.0(10) . . . . ?


#==============================================================================
# Additional structures and associated data_? identifiers
# should be added at this point if there is more than one 
# structure analysis in the CIF.

_shelx_res_file
;
TITL VO_L5-Me
    shelxl.res
    created by SHELXL-2016/6 at 18:56:25 on 08-Jul-2021
CELL  0.71069 15.30660 15.58170 18.45780 87.10740 69.06410 79.74030
ZERR  2 0.00510 0.00470 0.00470 0.02450 0.02110 0.02590
LATT 1
SFAC C H N O V
UNIT 140 96 16 38 6
OMIT      0  -2   1
OMIT     -3  -1   1
OMIT     -3   0   1
OMIT      3   1   2
OMIT     -1  -1   4
OMIT      4   0   1
OMIT      3   0   2
OMIT      0   0   3
OMIT     -4   2   2
OMIT     -2   1   0
OMIT      2  -1   2
OMIT      0   4   0
OMIT     -4   0   1
OMIT     -2   1   2
OMIT      4   1   4
OMIT      2   4   0
OMIT     -2   0   1
OMIT      0   1   3
OMIT      1   1   2
OMIT      4   3   3
OMIT      2   0   2
OMIT      2   5   0
OMIT      3   2   2
OMIT      2   5   3
OMIT     -1  -1   6
OMIT     -1   1   4
OMIT     -1  -5   1
OMIT     -1  -2   1
L.S. 30
FMAP 2
PLAN 100
WPDB -2
HTAB
BOND $H
CONF
LIST 4
TEMP 19.0
ACTA 50
RIGU
SIZE 0.100 0.300 0.900
ABIN
DFIX 1.5000 0.0200 C69 C70
DFIX 1.2000 0.0200 C70 N8
DFIX 1.5000 0.0200 C67 C68
DFIX 1.2000 0.0200 C68 N7
DANG 2.9147 0.0400 C69 N8
DANG 2.9106 0.0400 C67 N7
WGHT    0.172200
FVAR       0.37056
V1    5    0.372101    0.225946    1.033611    11.00000    0.07093    0.06212 =
         0.04630    0.00608   -0.02421   -0.01113
V2    5    0.648276    0.310011    0.565188    11.00000    0.06985    0.08069 =
         0.03781   -0.00249   -0.00964   -0.00663
V3    5    0.065082    0.499812    0.776993    11.00000    0.04951    0.07165 =
         0.05255   -0.00124   -0.01182   -0.00563
O1    4    0.453618    0.140214    0.960158    11.00000    0.08457    0.05425 =
         0.06954   -0.00197   -0.03472    0.00058
O2    4    0.299919    0.339220    1.064150    11.00000    0.07715    0.06615 =
         0.04765    0.00042   -0.02541   -0.00741
O3    4    0.105141    0.582029    0.991691    11.00000    0.07356    0.05775 =
         0.05058   -0.00227   -0.01605   -0.00096
O4    4   -0.023502    0.596822    0.821830    11.00000    0.04882    0.07211 =
         0.06099    0.00177   -0.01217   -0.00098
O5    4    0.569658    0.279614    0.517318    11.00000    0.09436    0.06508 =
         0.05072   -0.00259   -0.02935   -0.01700
O6    4    0.675514    0.363439    0.645004    11.00000    0.07803    0.10353 =
         0.04397    0.00792   -0.02080   -0.02902
O7    4    0.593864    0.390072    0.921900    11.00000    0.08343    0.09270 =
         0.03815    0.00656   -0.02574   -0.03667
O8    4    0.433676    0.241806    1.099911    11.00000    0.07876    0.06250 =
         0.04575    0.00351   -0.03428   -0.01029
O9    4    0.022374    0.404414    0.832982    11.00000    0.07305    0.07037 =
         0.05155   -0.00954   -0.00834   -0.01620
O10   4    0.157304    0.574181    0.735551    11.00000    0.05189    0.05267 =
         0.05929    0.00276   -0.00845    0.00404
O11   4    0.489873    0.586134    0.595558    11.00000    0.06186    0.06353 =
         0.04717    0.00591   -0.01671   -0.01740
O12   4    0.720608    0.380871    0.497638    11.00000    0.06221    0.09145 =
         0.03755   -0.00188   -0.00692   -0.01394
O13   4    0.305881    0.162445    1.085987    11.00000    0.09566    0.07903 =
         0.06620    0.01830   -0.03544   -0.02934
O14   4    0.723465    0.219296    0.549419    11.00000    0.08139    0.09394 =
         0.07611   -0.00568   -0.00220    0.01475
O15   4    0.030866    0.485539    0.707017    11.00000    0.06101    0.11447 =
         0.05309   -0.00162   -0.01811   -0.00956
O16A  4    0.699536    0.106683    0.944201    10.40000    0.18782
O16B  4    0.924001    0.255945    0.613632    10.40000    0.18536
O16C  4    0.688787   -0.012969    0.657792    10.20000    0.17020
O17A  4    0.183797    0.860231    0.906786    10.45000    0.21227
O17B  4    0.238151    0.741043    0.850598    10.55000    0.19939
N1    3    0.298974    0.248126    0.955619    11.00000    0.05391    0.05169 =
         0.04694    0.00165   -0.01891   -0.00703
N2    3    0.099566    0.512106    0.890817    11.00000    0.05388    0.05161 =
         0.04928    0.00126   -0.00950   -0.00512
N3    3    0.554432    0.261210    0.666469    11.00000    0.04743    0.08385 =
         0.04164    0.00320   -0.01919   -0.01069
N4    3    0.485753    0.302076    0.949982    11.00000    0.07502    0.07445 =
         0.03335    0.00780   -0.02282   -0.02116
N5    3    0.192026    0.408848    0.728420    11.00000    0.05147    0.06008 =
         0.04751    0.00014   -0.01973   -0.01526
N6    3    0.533809    0.440117    0.587514    11.00000    0.04853    0.07623 =
         0.04520   -0.01086   -0.00870   -0.01101
N7    3    0.249841    0.833354    0.667688    11.00000    0.23327
N8    3   -0.199387    0.579440    0.733476    11.00000    0.37573
C1    1    0.432783    0.082616    0.918360    11.00000    0.07681    0.06170 =
         0.05579    0.00451   -0.02402   -0.00768
C2    1    0.495326    0.006053    0.892182    11.00000    0.10287    0.06822 =
         0.08348   -0.01649   -0.04353    0.00814
AFIX  43
H2    2    0.547134   -0.008362    0.908237    11.00000   -1.20000
AFIX   0
C3    1    0.482637   -0.048894    0.843217    11.00000    0.13145    0.06460 =
         0.10577   -0.02493   -0.06043    0.01416
AFIX  43
H3    2    0.526745   -0.099560    0.825397    11.00000   -1.20000
AFIX   0
C4    1    0.404327   -0.030511    0.819172    11.00000    0.14807    0.05322 =
         0.10562   -0.00045   -0.06992   -0.00764
C5    1    0.341408    0.048061    0.845061    11.00000    0.10847    0.05976 =
         0.10414    0.00148   -0.05977   -0.01375
AFIX  43
H5    2    0.290073    0.062666    0.828438    11.00000   -1.20000
AFIX   0
C6    1    0.354125    0.105601    0.895812    11.00000    0.08858    0.03940 =
         0.06826    0.01593   -0.04220   -0.01363
C7    1    0.294063    0.187146    0.911387    11.00000    0.07680    0.05729 =
         0.06427    0.00514   -0.04033   -0.01478
AFIX  43
H7    2    0.247766    0.198673    0.888865    11.00000   -1.20000
AFIX   0
C8    1    0.244060    0.334177    0.960982    11.00000    0.05857    0.05151 =
         0.04713   -0.00063   -0.01798   -0.00450
C9    1    0.248588    0.382148    1.023003    11.00000    0.04988    0.06274 =
         0.02853    0.00313   -0.00468   -0.01354
C10   1    0.200222    0.468059    1.038903    11.00000    0.06945    0.06898 =
         0.03689   -0.01125   -0.00877    0.00702
AFIX  43
H10   2    0.200113    0.500770    1.079719    11.00000   -1.20000
AFIX   0
C11   1    0.153277    0.500462    0.990401    11.00000    0.05710    0.03900 =
         0.05093   -0.00262   -0.00991   -0.00655
C12   1    0.150758    0.456691    0.928201    11.00000    0.05013    0.05075 =
         0.04542   -0.00208   -0.00775   -0.00383
C13   1    0.195993    0.370448    0.912585    11.00000    0.05080    0.04506 =
         0.05396   -0.00757   -0.01803   -0.00587
AFIX  43
H13   2    0.194165    0.338762    0.871932    11.00000   -1.20000
AFIX   0
C14   1    0.073047    0.584269    0.929943    11.00000    0.06408    0.04336 =
         0.05290    0.00873   -0.01503   -0.01605
C15   1    0.014461    0.663387    0.916953    11.00000    0.05547    0.05108 =
         0.05439    0.00789   -0.00627   -0.00353
C16   1    0.000881    0.740753    0.962086    11.00000    0.08648    0.06936 =
         0.08133   -0.01772   -0.01604   -0.00309
AFIX  43
H16   2    0.029704    0.738545    0.998928    11.00000   -1.20000
AFIX   0
C17   1   -0.054129    0.818744    0.952180    11.00000    0.09792    0.06413 =
         0.10742   -0.01429   -0.01973   -0.00879
C18   1   -0.096047    0.814823    0.896530    11.00000    0.08858    0.07235 =
         0.13079   -0.01182   -0.03288    0.00739
AFIX  43
H18   2   -0.134046    0.865371    0.888704    11.00000   -1.20000
AFIX   0
C19   1   -0.085794    0.742632    0.852515    11.00000    0.07143    0.08180 =
         0.10428   -0.00470   -0.03369    0.00850
AFIX  43
H19   2   -0.116095    0.745249    0.816652    11.00000   -1.20000
AFIX   0
C20   1   -0.029047    0.664903    0.862328    11.00000    0.05075    0.06360 =
         0.06504    0.00404   -0.01083   -0.00659
C21   1    0.391673   -0.091983    0.762512    11.00000    0.17300    0.06066 =
         0.13081   -0.01756   -0.07220   -0.00651
AFIX 137
H21A  2    0.333416   -0.070462    0.753940    11.00000   -1.20000
H21B  2    0.389730   -0.149278    0.784089    11.00000   -1.20000
H21C  2    0.443967   -0.094620    0.714105    11.00000   -1.20000
AFIX   0
C22   1   -0.063108    0.895838    0.996653    11.00000    0.14778    0.08099 =
         0.19575   -0.06125   -0.06716    0.01297
AFIX 137
H22A  2   -0.013346    0.888310    1.017771    11.00000   -1.20000
H22B  2   -0.123608    0.904695    1.038155    11.00000   -1.20000
H22C  2   -0.058325    0.945632    0.963525    11.00000   -1.20000
AFIX   0
C23   1    0.522258    0.216055    0.528050    11.00000    0.06611    0.06093 =
         0.04757   -0.00960   -0.01943   -0.00056
C24   1    0.500409    0.189046    0.466381    11.00000    0.08983    0.08976 =
         0.05966   -0.01882   -0.02756   -0.01422
AFIX  43
H24   2    0.523249    0.214270    0.417988    11.00000   -1.20000
AFIX   0
C25   1    0.446679    0.126941    0.476551    11.00000    0.11492    0.10682 =
         0.07746   -0.02973   -0.03993   -0.02261
AFIX  43
H25   2    0.436321    0.108086    0.433756    11.00000   -1.20000
AFIX   0
C26   1    0.404073    0.087891    0.550929    11.00000    0.07566    0.08212 =
         0.08290   -0.02510   -0.03463    0.00140
C27   1    0.430910    0.113301    0.610438    11.00000    0.08048    0.06344 =
         0.07728    0.00603   -0.03861   -0.01574
AFIX  43
H27   2    0.409393    0.086791    0.658360    11.00000   -1.20000
AFIX   0
C28   1    0.487454    0.175426    0.601969    11.00000    0.06254    0.05633 =
         0.05679   -0.01126   -0.01722   -0.00517
C29   1    0.500582    0.203825    0.667259    11.00000    0.06461    0.07732 =
         0.04950    0.01099   -0.02834   -0.01734
AFIX  43
H29   2    0.468941    0.180475    0.714845    11.00000   -1.20000
AFIX   0
C30   1    0.559446    0.291682    0.736224    11.00000    0.06904    0.07458 =
         0.03853    0.00133   -0.01862   -0.01579
C31   1    0.627341    0.347375    0.719729    11.00000    0.05983    0.06758 =
         0.04263    0.00896   -0.01919   -0.01225
C32   1    0.644099    0.385004    0.781313    11.00000    0.08099    0.09262 =
         0.05007    0.01104   -0.02222   -0.04393
AFIX  43
H32   2    0.688283    0.421870    0.772682    11.00000   -1.20000
AFIX   0
C33   1    0.591325    0.363163    0.852490    11.00000    0.06674    0.08171 =
         0.04362    0.01170   -0.03005   -0.01998
C34   1    0.526481    0.308323    0.869286    11.00000    0.07170    0.06019 =
         0.03064    0.00202   -0.01732   -0.01505
C35   1    0.509060    0.270475    0.810961    11.00000    0.06330    0.07111 =
         0.03973    0.00128   -0.01529   -0.02243
AFIX  43
H35   2    0.465543    0.232620    0.821618    11.00000   -1.20000
AFIX   0
C36   1    0.529250    0.351214    0.976299    11.00000    0.06888    0.06914 =
         0.04691    0.00745   -0.02696   -0.01731
C37   1    0.522317    0.362700    1.057088    11.00000    0.08882    0.05821 =
         0.04391    0.00416   -0.03146   -0.01109
C38   1    0.562643    0.425298    1.077197    11.00000    0.09674    0.07285 =
         0.04979    0.00207   -0.03370   -0.01797
AFIX  43
H38   2    0.592979    0.462553    1.039295    11.00000   -1.20000
AFIX   0
C39   1    0.559368    0.434399    1.152059    11.00000    0.06514    0.06551 =
         0.04844   -0.00038   -0.02697   -0.00200
C40   1    0.513217    0.379989    1.206532    11.00000    0.08607    0.07861 =
         0.03667   -0.00138   -0.03455   -0.01393
AFIX  43
H40   2    0.510982    0.384920    1.257192    11.00000   -1.20000
AFIX   0
C41   1    0.469596    0.317729    1.189264    11.00000    0.08498    0.08706 =
         0.04102    0.00357   -0.02793   -0.02342
AFIX  43
H41   2    0.437381    0.282862    1.228583    11.00000   -1.20000
AFIX   0
C42   1    0.473049    0.306123    1.113158    11.00000    0.07126    0.06257 =
         0.04182    0.00261   -0.03425   -0.00711
C43   1    0.335586    0.020597    0.562516    11.00000    0.11354    0.10867 =
         0.09551   -0.02064   -0.04708   -0.02347
AFIX 137
H43A  2    0.311015    0.006039    0.616374    11.00000   -1.20000
H43B  2    0.369762   -0.031210    0.532381    11.00000   -1.20000
H43C  2    0.284003    0.045711    0.545895    11.00000   -1.20000
AFIX   0
C44   1    0.608706    0.500886    1.171409    11.00000    0.09774    0.09769 =
         0.07004    0.00446   -0.04491   -0.03011
AFIX 137
H44A  2    0.666496    0.471915    1.177434    11.00000   -1.20000
H44B  2    0.567908    0.530838    1.218865    11.00000   -1.20000
H44C  2    0.623082    0.542174    1.130229    11.00000   -1.20000
AFIX   0
C45   1    0.034344    0.321065    0.813383    11.00000    0.07544    0.07558 =
         0.05191   -0.00073   -0.01865   -0.02480
C46   1   -0.038868    0.271723    0.849976    11.00000    0.08155    0.09008 =
         0.08998    0.00151   -0.01764   -0.04282
AFIX  43
H46   2   -0.096056    0.297650    0.886583    11.00000   -1.20000
AFIX   0
C47   1   -0.023606    0.184144    0.830168    11.00000    0.10349    0.09373 =
         0.12720   -0.00114   -0.00333   -0.04883
AFIX  43
H47   2   -0.072636    0.152612    0.852624    11.00000   -1.20000
AFIX   0
C48   1    0.064365    0.140407    0.776675    11.00000    0.10162    0.08026 =
         0.15643   -0.00863   -0.01319   -0.04343
C49   1    0.133297    0.189804    0.740669    11.00000    0.07000    0.06882 =
         0.10641   -0.01649    0.00055   -0.02348
AFIX  43
H49   2    0.190440    0.163139    0.704478    11.00000   -1.20000
AFIX   0
C50   1    0.120063    0.281430    0.757068    11.00000    0.06669    0.06516 =
         0.06047   -0.00794   -0.01860   -0.02212
C51   1    0.198953    0.326078    0.718922    11.00000    0.06670    0.06313 =
         0.05863   -0.01146   -0.00720   -0.01775
AFIX  43
H51   2    0.256113    0.294515    0.686749    11.00000   -1.20000
AFIX   0
C52   1    0.273276    0.449578    0.691734    11.00000    0.05071    0.05170 =
         0.04644    0.01305   -0.02180   -0.00773
C53   1    0.249286    0.540979    0.696927    11.00000    0.05748    0.05476 =
         0.04430    0.00731   -0.01352   -0.00417
C54   1    0.316966    0.594399    0.663316    11.00000    0.06131    0.05459 =
         0.03951    0.00969   -0.01304   -0.00619
AFIX  43
H54   2    0.301467    0.654909    0.663866    11.00000   -1.20000
AFIX   0
C55   1    0.408442    0.550640    0.629278    11.00000    0.05834    0.06563 =
         0.03701    0.00290   -0.01628   -0.01495
C56   1    0.436167    0.460309    0.623717    11.00000    0.05166    0.06586 =
         0.02509    0.00741   -0.00654   -0.00758
C57   1    0.365734    0.406745    0.654591    11.00000    0.05868    0.04893 =
         0.03387   -0.00271   -0.01403   -0.00624
AFIX  43
H57   2    0.380639    0.346254    0.650207    11.00000   -1.20000
AFIX   0
C58   1    0.560767    0.514033    0.571352    11.00000    0.05933    0.07508 =
         0.02805   -0.00728   -0.01750   -0.01147
C59   1    0.657052    0.534785    0.534089    11.00000    0.06946    0.08339 =
         0.02676    0.00640   -0.01201   -0.02310
C60   1    0.674170    0.618885    0.529039    11.00000    0.06689    0.08099 =
         0.06910    0.00410   -0.01792   -0.02131
AFIX  43
H60   2    0.624246    0.664285    0.551190    11.00000   -1.20000
AFIX   0
C61   1    0.764673    0.636877    0.491445    11.00000    0.06789    0.10739 =
         0.05439   -0.00149   -0.01285   -0.03300
C62   1    0.835516    0.569131    0.456498    11.00000    0.07179    0.11774 =
         0.07422   -0.01142   -0.00243   -0.03352
AFIX  43
H62   2    0.895914    0.581539    0.429535    11.00000   -1.20000
AFIX   0
C63   1    0.823115    0.485390    0.458759    11.00000    0.05841    0.11191 =
         0.04872   -0.00781   -0.00419   -0.01885
AFIX  43
H63   2    0.874284    0.441681    0.434913    11.00000   -1.20000
AFIX   0
C64   1    0.732847    0.464788    0.497183    11.00000    0.06141    0.09446 =
         0.03819   -0.00145   -0.00579   -0.01610
C65   1    0.078585    0.044314    0.759783    11.00000    0.15652    0.07903 =
         0.22346   -0.02279   -0.02017   -0.05697
AFIX 137
H65A  2    0.108119    0.011903    0.793028    11.00000   -1.20000
H65B  2    0.118503    0.032296    0.706585    11.00000   -1.20000
H65C  2    0.018194    0.027501    0.768970    11.00000   -1.20000
AFIX   0
C66   1    0.787980    0.728234    0.487051    11.00000    0.09110    0.10853 =
         0.16004   -0.00477   -0.01629   -0.03243
AFIX 137
H66A  2    0.746506    0.760923    0.532841    11.00000   -1.20000
H66B  2    0.779481    0.756790    0.442131    11.00000   -1.20000
H66C  2    0.852677    0.724707    0.483405    11.00000   -1.20000
AFIX   0
C67   1    0.101053    0.780469    0.643838    11.00000    0.23766
AFIX 137
H67A  2    0.129748    0.731684    0.608549    11.00000   -1.20000
H67B  2    0.064475    0.823548    0.622239    11.00000   -1.20000
H67C  2    0.060260    0.761231    0.692353    11.00000   -1.20000
AFIX   0
C68   1    0.178201    0.820004    0.657108    11.00000    0.19685
C69   1   -0.079409    0.664710    0.620875    11.00000    0.28598
AFIX 137
H69A  2   -0.018328    0.628523    0.609937    11.00000   -1.20000
H69B  2   -0.080699    0.718091    0.645328    11.00000   -1.20000
H69C  2   -0.090934    0.677575    0.573334    11.00000   -1.20000
AFIX   0
C70   1   -0.156087    0.616955    0.674933    11.00000    0.26686
HKLF 4


REM  VO_L5-Me
REM R1 =  0.0858 for    3661 Fo > 4sig(Fo)  and  0.2692 for all   10895 data
REM    863 parameters refined using    942 restraints

END

WGHT      0.1718      0.0000

REM No hydrogen bonds found for HTAB generation

REM Highest difference peak  0.733,  deepest hole -0.355,  1-sigma level  0.098
Q1    1   0.9411  0.1961  0.6051  11.00000  0.05    0.73
Q2    1   0.8881  0.2233  0.6627  11.00000  0.05    0.72
Q3    1   0.7152  0.1696  0.9529  11.00000  0.05    0.71
Q4    1   0.2276  0.7678  0.9108  11.00000  0.05    0.70
Q5    1   0.7129  0.1483  0.9016  11.00000  0.05    0.69
Q6    1   0.9064  0.2942  0.6542  11.00000  0.05    0.68
Q7    1   0.9367  0.2934  0.5577  11.00000  0.05    0.66
Q8    1   0.6164 -0.0159  0.6563  11.00000  0.05    0.64
Q9    1   0.9212  0.3074  0.5842  11.00000  0.05    0.63
Q10   1   0.6578 -0.0710  0.6491  11.00000  0.05    0.62
Q11   1   0.6389 -0.0492  0.6498  11.00000  0.05    0.60
Q12   1   0.6594  0.1264  0.9854  11.00000  0.05    0.59
Q13   1  -0.1634  0.5468  0.6557  11.00000  0.05    0.56
Q14   1  -0.1767  0.6938  0.6924  11.00000  0.05    0.54
Q15   1   0.6761  0.0803  0.9728  11.00000  0.05    0.53
Q16   1   0.7164 -0.0521  0.6727  11.00000  0.05    0.52
Q17   1   0.7426  0.0800  0.9024  11.00000  0.05    0.51
Q18   1   0.6902  0.0226  0.6760  11.00000  0.05    0.49
Q19   1  -0.2253  0.6128  0.7605  11.00000  0.05    0.40
Q20   1   0.2411  0.7180  0.8225  11.00000  0.05    0.37
Q21   1   0.1782  0.9098  0.8955  11.00000  0.05    0.37
Q22   1   0.2002  0.7722  0.8154  11.00000  0.05    0.37
Q23   1   0.1027  0.8515  0.6213  11.00000  0.05    0.33
Q24   1   0.1749  0.8038  0.7822  11.00000  0.05    0.33
Q25   1  -0.0838  0.5991  0.6008  11.00000  0.05    0.32
Q26   1  -0.0700  0.8167  0.8706  11.00000  0.05    0.31
Q27   1  -0.0554  0.0488  0.8305  11.00000  0.05    0.30
Q28   1  -0.2147  0.5259  0.7884  11.00000  0.05    0.29
Q29   1  -0.0465  0.7914  0.9252  11.00000  0.05    0.28
Q30   1   0.4932  0.0930  0.5093  11.00000  0.05    0.28
Q31   1  -0.0690  0.7729  0.8491  11.00000  0.05    0.27
Q32   1   0.2162  0.8548  0.6380  11.00000  0.05    0.27
Q33   1   0.1344  0.8046  0.6566  11.00000  0.05    0.25
Q34   1   0.0183  0.1719  0.8118  11.00000  0.05    0.25
Q35   1   0.3678  0.0006  0.8122  11.00000  0.05    0.25
Q36   1  -0.0401  0.7254  0.8670  11.00000  0.05    0.25
Q37   1  -0.1800  0.7272  0.8956  11.00000  0.05    0.24
Q38   1  -0.0350  0.7015  0.8416  11.00000  0.05    0.24
Q39   1   0.0444  0.4678  0.7525  11.00000  0.05    0.24
Q40   1  -0.0555  0.7046  0.8884  11.00000  0.05    0.24
Q41   1   0.7763  0.6686  0.4320  11.00000  0.05    0.23
Q42   1   0.6835  0.5012  0.5255  11.00000  0.05    0.23
Q43   1   0.2448  0.3521  0.9822  11.00000  0.05    0.23
Q44   1   0.0897  0.7506  0.6428  11.00000  0.05    0.23
Q45   1  -0.0817  0.6962  0.7716  11.00000  0.05    0.22
Q46   1   0.2539  0.0584  0.8718  11.00000  0.05    0.22
Q47   1   0.5165  0.3371  0.8324  11.00000  0.05    0.22
Q48   1   0.5024  0.1808  0.5483  11.00000  0.05    0.22
Q49   1   0.4661  0.2645  0.5545  11.00000  0.05    0.22
Q50   1   0.3228  0.0709  0.8158  11.00000  0.05    0.22
Q51   1   0.5264  0.4639  0.9710  11.00000  0.05    0.22
Q52   1   0.2015  0.3703  0.9459  11.00000  0.05    0.22
Q53   1   0.0004  0.6952  0.9365  11.00000  0.05    0.22
Q54   1   0.1023  0.6450  0.9991  11.00000  0.05    0.22
Q55   1   0.5519  0.5552  1.1856  11.00000  0.05    0.22
Q56   1   0.1098  0.3887  0.7585  11.00000  0.05    0.21
Q57   1   0.3610  0.1308  1.0586  11.00000  0.05    0.21
Q58   1   0.2833 -0.0534  0.5709  11.00000  0.05    0.21
Q59   1   0.4978  0.5969  1.2872  11.00000  0.05    0.21
Q60   1   0.6593  0.5047  1.1924  11.00000  0.05    0.21
Q61   1   0.2553  0.1349  0.7104  11.00000  0.05    0.21
Q62   1   0.6818  0.5523  0.4577  11.00000  0.05    0.21
Q63   1   0.2533 -0.0348  0.5613  11.00000  0.05    0.21
Q64   1   0.6467  0.5165  1.2149  11.00000  0.05    0.21
Q65   1   0.3964  0.4304  0.6360  11.00000  0.05    0.21
Q66   1   0.0298  0.8822  0.8245  11.00000  0.05    0.21
Q67   1   0.2722  0.2976  0.9473  11.00000  0.05    0.21
Q68   1   0.2805  0.4183  1.0802  11.00000  0.05    0.21
Q69   1   0.7166  0.5790  0.4227  11.00000  0.05    0.21
Q70   1   0.6981  0.5647  0.4375  11.00000  0.05    0.21
Q71   1   0.2457  0.2195  0.8406  11.00000  0.05    0.21
Q72   1   0.7627  0.7931  0.5089  11.00000  0.05    0.21
Q73   1   0.2548  0.3323  0.8790  11.00000  0.05    0.21
Q74   1   0.7561  0.6808  0.5060  11.00000  0.05    0.21
Q75   1   0.2236  0.4303  1.0346  11.00000  0.05    0.20
Q76   1   0.0368  0.5778  0.8284  11.00000  0.05    0.20
Q77   1   0.4847  0.5899  1.2385  11.00000  0.05    0.20
Q78   1   0.1616  0.4160  0.9381  11.00000  0.05    0.20
Q79   1   0.3840 -0.0444  0.8828  11.00000  0.05    0.20
Q80   1  -0.0732  0.6192  0.7420  11.00000  0.05    0.20
Q81   1   0.7338  0.3980  0.5264  11.00000  0.05    0.20
Q82   1   0.4190 -0.0248  0.9891  11.00000  0.05    0.20
Q83   1   0.1654  0.7894  0.7137  11.00000  0.05    0.20
Q84   1   0.4104  0.5022  0.6458  11.00000  0.05    0.20
Q85   1  -0.1314  0.8927  0.8796  11.00000  0.05    0.20
Q86   1   0.1975  0.3339  1.0068  11.00000  0.05    0.20
Q87   1   0.6850  0.4404  0.4925  11.00000  0.05    0.20
Q88   1   0.2739  0.1624  1.0568  11.00000  0.05    0.20
Q89   1   0.3838 -0.1348  0.8597  11.00000  0.05    0.20
Q90   1   0.6843  0.3572  0.5092  11.00000  0.05    0.20
Q91   1  -0.2402  0.6383  0.6315  11.00000  0.05    0.20
Q92   1   0.2818  0.7717  0.7599  11.00000  0.05    0.20
Q93   1  -0.1440  0.6352  0.8138  11.00000  0.05    0.20
Q94   1   0.5792  0.4195  1.1207  11.00000  0.05    0.20
Q95   1   0.1800  0.5512  0.9762  11.00000  0.05    0.20
Q96   1   0.2046  0.4646  0.7138  11.00000  0.05    0.20
Q97   1   0.3790  0.1680  0.9995  11.00000  0.05    0.20
Q98   1   0.6137  0.4686  1.1326  11.00000  0.05    0.19
Q99   1   0.3427  0.2832  1.0404  11.00000  0.05    0.19
Q100  1   0.6006  0.3617  0.9388  11.00000  0.05    0.19
;

_shelx_res_checksum   70897

_shelx_hkl_file
;
   2   0   0 2582.59   17.67
  -2   0   0 2561.59   17.50
   3   0   0   22.05    4.94
  -3   0   0   28.81    4.89
   4   0   0  366.13   17.64
  -4   0   0  331.95   17.93
   5   0   0  227.57   19.73
  -5   0   0  229.45   19.17
   6   0   0   56.38    8.60
  -6   0   0   67.95    8.43
   7   0   0  240.69   21.18
  -7   0   0  224.54   20.39
   8   0   0   -6.86   22.25
  -8   0   0   29.98   20.77
   9   0   0   29.39   25.48
  -9   0   0   51.05   11.31
  10   0   0   55.63   12.24
 -10   0   0   32.09   28.37
  11   0   0   58.45   13.23
 -11   0   0   43.01   29.68
  12   0   0    1.86   21.64
 -12   0   0   27.13   29.87
  13   0   0   44.64   31.82
 -13   0   0   23.89   32.59
  14   0   0   46.25   33.65
 -14   0   0    3.59   32.80
  15   0   0  -17.17   34.01
 -15   0   0  -21.43   34.31
  16   0   0  -39.81   53.37
 -16   0   0  -45.37   54.84
 -17   0  -1  -37.77   52.69
  17   0   1   12.80   38.67
 -16   0  -1  -19.51   50.60
  16   0   1   -3.65   50.91
 -15   0  -1  -28.83   36.04
  15   0   1   14.86   16.87
 -14   0  -1   14.93   32.58
  14   0   1    3.91   33.29
 -13   0  -1   23.35   18.86
  13   0   1   29.23   32.45
 -12   0  -1  155.27   15.26
  12   0   1  136.43   14.09
 -11   0  -1   33.30   27.33
  11   0   1   22.52   27.57
 -10   0  -1    1.34   27.00
  10   0   1   19.94   19.20
  -9   0  -1  127.96   12.50
   9   0   1  110.51   11.20
  -8   0  -1  131.70   11.19
   8   0   1  126.53   12.49
  -7   0  -1    9.47   19.13
   7   0   1   -7.46   18.57
  -6   0  -1  -44.76   18.42
   6   0   1   -1.23   17.08
  -5   0  -1  264.65   19.15
   5   0   1  286.83   19.10
  -4   0  -1   94.69    7.56
   4   0   1  112.82   10.70
  -3   0  -1  373.25   12.29
   3   0   1  371.31   12.66
  -2   0  -1 4318.78   21.34
   2   0   1 4356.84   21.32
   2   0  -1   72.68    6.18
  -2   0   1   53.33    5.21
   3   0  -1   86.68    7.84
  -3   0   1  106.52    9.35
   4   0  -1  249.19   17.68
  -4   0   1  247.07   18.34
   5   0  -1   -3.26   17.94
  -5   0   1   26.06   18.52
   6   0  -1  345.11   20.91
  -6   0   1  348.69   20.52
   7   0  -1  -26.64   21.56
  -7   0   1   -8.62   20.79
   8   0  -1  -31.48   24.05
  -8   0   1   26.46   22.60
   9   0  -1   -3.26   25.68
  -9   0   1   17.95   24.65
  10   0  -1  124.69   13.10
 -10   0   1  105.87   13.00
  11   0  -1   12.26   30.85
 -11   0   1   -3.74   30.22
  12   0  -1 -102.34   33.66
 -12   0   1   30.00   31.45
  13   0  -1   49.71   33.48
 -13   0   1   13.16   34.60
  14   0  -1   15.39   33.85
 -14   0   1    7.79   34.42
  15   0  -1   66.35   46.02
 -15   0   1  -34.69   48.95
  16   0  -1  -56.78   55.18
 -16   0   1   57.04   45.61
 -17   0  -2 -104.28   53.38
  17   0   2   21.79   54.72
 -16   0  -2   31.90   46.64
  16   0   2   38.29   44.40
 -15   0  -2   -6.37   34.66
  15   0   2   42.02   33.83
 -14   0  -2   -6.62   31.92
  14   0   2   28.38   21.97
 -13   0  -2  -17.31   31.53
  13   0   2   22.82   13.72
 -12   0  -2   26.81   29.56
  12   0   2   -1.59   30.14
 -11   0  -2    2.98   27.72
  11   0   2   27.22   28.31
 -10   0  -2  -18.99   26.17
  10   0   2  -22.13   26.84
  -9   0  -2   71.31   10.67
   9   0   2  101.44   10.59
  -8   0  -2   34.79    9.43
   8   0   2   65.44    9.33
  -7   0  -2  215.42   19.87
   7   0   2  169.63   14.46
  -6   0  -2  -11.89   17.65
   6   0   2   -8.45   18.42
  -5   0  -2  436.08   20.30
   5   0   2  482.23   20.21
  -4   0  -2  348.72   16.77
   4   0   2  364.30   16.55
  -3   0  -2  494.18   13.89
   3   0   2  512.94   13.63
  -2   0  -2  231.88    8.67
   2   0   2  218.64    8.80
   1   0  -2 5604.28   25.99
  -1   0   2 5547.96   25.92
   2   0  -2  404.21   12.97
  -2   0   2  380.70   13.08
   3   0  -2    5.70   15.48
  -3   0   2  -15.98   15.47
   4   0  -2    8.28   17.68
  -4   0   2   -5.64   18.09
   5   0  -2   -1.81   17.62
  -5   0   2  -23.98   18.76
   6   0  -2   40.23    8.48
  -6   0   2   19.58    8.51
   7   0  -2   25.14   20.18
  -7   0   2   10.94   20.12
   8   0  -2  474.77   28.53
  -8   0   2  475.07   29.19
   9   0  -2  -23.39   28.08
  -9   0   2   17.86   19.15
  10   0  -2    5.85   29.06
 -10   0   2   17.05   28.92
  11   0  -2  219.52   19.18
 -11   0   2  195.25   19.02
  12   0  -2   -2.27   30.36
 -12   0   2  -14.77   32.22
  13   0  -2   -8.62   33.93
 -13   0   2    6.01   34.65
  14   0  -2   10.12   32.18
 -14   0   2   11.66   34.75
  15   0  -2  -73.62   54.64
 -15   0   2   17.41   51.52
  16   0  -2  -78.61   60.01
 -16   0   2   29.86   53.07
 -17   0  -3   24.33   51.44
  17   0   3   -6.68   56.05
 -16   0  -3   41.80   48.34
  16   0   3   16.13   47.22
 -15   0  -3  -58.92   35.25
  15   0   3    8.18   32.81
 -14   0  -3    8.60   31.00
  14   0   3  -24.11   32.79
 -13   0  -3   76.56   14.62
  13   0   3   42.24   33.20
 -12   0  -3  -86.67   31.99
  12   0   3   25.45   29.50
 -11   0  -3   63.71   12.24
  11   0   3   46.77   12.39
 -10   0  -3   58.69   11.41
  10   0   3   44.42   11.69
  -9   0  -3   24.20   22.35
   9   0   3    1.48   22.05
  -8   0  -3   23.06   20.70
   8   0   3    6.92   20.99
  -7   0  -3   14.20   17.81
   7   0   3  -24.21   18.97
  -6   0  -3  217.46   19.48
   6   0   3  240.16   19.50
  -5   0  -3  103.24   10.05
   5   0   3  103.95    8.98
  -4   0  -3 5101.16   35.38
   4   0   3 5249.97   35.46
  -3   0  -3 1845.27   20.90
   3   0   3 1903.18   20.61
  -2   0  -3 2060.31   18.69
   2   0   3 2030.76   18.50
  -1   0  -3  716.70   12.26
   1   0   3  704.42   11.99
   0   0  -3    1.94    8.34
   0   0   3  -14.29    8.82
   1   0  -3  806.57   15.33
  -1   0   3  795.39   15.20
   2   0  -3 1645.14   22.37
  -2   0   3 1634.26   22.52
   3   0  -3  187.59   18.48
  -3   0   3  237.26   18.04
   4   0  -3  249.71   20.16
  -4   0   3  219.04   19.92
   5   0  -3  -15.59   18.84
  -5   0   3    7.44   17.52
   6   0  -3  131.01   12.68
  -6   0   3  151.05   14.85
   7   0  -3   27.84   22.17
  -7   0   3    0.00   22.93
   8   0  -3    5.00   25.12
  -8   0   3   26.41   25.06
   9   0  -3   20.46   27.27
  -9   0   3   35.80   12.09
  10   0  -3    5.03   30.57
 -10   0   3  -22.48   31.64
  11   0  -3   27.82   31.06
 -11   0   3    2.49   30.73
  12   0  -3   17.76   22.58
 -12   0   3    0.56   32.46
  13   0  -3  -45.90   36.18
 -13   0   3    9.75   31.81
  14   0  -3   47.44   33.58
 -14   0   3   22.02   35.21
  15   0  -3   44.83   49.30
 -15   0   3   57.94   52.00
 -17   0  -4    8.22   52.57
  17   0   4  -16.91   50.36
 -16   0  -4   34.93   24.33
  16   0   4   49.55   33.24
 -15   0  -4   18.79   34.31
  15   0   4   64.82   15.54
 -14   0  -4  -48.58   33.38
  14   0   4  -19.57   31.22
 -13   0  -4   32.33   32.39
  13   0   4   13.34   31.35
 -12   0  -4   34.05   13.22
  12   0   4   41.34   29.12
 -11   0  -4   13.24   27.11
  11   0   4    9.30   27.69
 -10   0  -4   -8.09   26.22
  10   0   4   33.89   24.79
  -9   0  -4   -3.12   22.29
   9   0   4  -10.84   22.21
  -8   0  -4   17.22   21.15
   8   0   4   14.36   21.17
  -7   0  -4   26.68    8.47
   7   0   4   50.67    8.37
  -6   0  -4  186.06   14.21
   6   0   4  189.07   13.84
  -5   0  -4  346.81   21.17
   5   0   4  379.32   21.01
  -4   0  -4   64.22    7.39
   4   0   4   73.39    7.36
  -3   0  -4  376.57   15.93
   3   0   4  371.38   15.84
  -2   0  -4 1306.49   18.84
   2   0   4 1318.15   19.14
  -1   0  -4  903.44   16.24
   1   0   4  866.82   16.26
   0   0  -4  309.04   14.33
   0   0   4  321.11   13.83
   1   0  -4  514.61   17.22
  -1   0   4  505.43   17.17
   2   0  -4 1475.53   24.03
  -2   0   4 1471.81   23.13
   3   0  -4    7.08   17.56
  -3   0   4   -5.54   18.26
   4   0  -4   -1.89   17.64
  -4   0   4  -17.03   18.37
   5   0  -4   -4.17   19.68
  -5   0   4    7.74   13.43
   6   0  -4  -16.30   21.83
  -6   0   4   27.48   20.66
   7   0  -4  269.50   26.30
  -7   0   4  260.02   18.85
   8   0  -4   60.58   12.03
  -8   0   4   -3.65   28.47
   9   0  -4  385.21   32.55
  -9   0   4  331.31   23.07
  10   0  -4   88.02   14.27
 -10   0   4  104.75   14.33
  11   0  -4   25.55   21.93
 -11   0   4  -44.79   31.85
  12   0  -4   67.49   15.21
 -12   0   4   75.96   15.17
  13   0  -4  -50.63   36.23
 -13   0   4  -45.06   36.15
  14   0  -4   13.31   52.15
 -14   0   4  -32.43   50.30
  15   0  -4  -75.08   56.09
 -15   0   4   31.45   52.18
 -17   0  -5   43.67   48.03
  17   0   5  -52.82   57.00
 -16   0  -5  -42.54   35.97
  16   0   5    3.75   35.31
 -15   0  -5  -45.71   34.54
  15   0   5   -4.43   32.64
 -14   0  -5   -0.64   31.61
  14   0   5  -76.92   32.78
 -13   0  -5   32.56   32.63
  13   0   5   69.27   14.08
 -12   0  -5   65.74   13.74
  12   0   5   81.35   13.43
 -11   0  -5   36.30   12.13
  11   0   5  -10.67   27.79
 -10   0  -5   33.37   26.05
  10   0   5    9.46   26.69
  -9   0  -5  166.05   13.81
   9   0   5  162.46   13.70
  -8   0  -5  267.35   23.58
   8   0   5  266.85   23.38
  -7   0  -5  220.55   20.56
   7   0   5  199.11   14.48
  -6   0  -5   91.58    8.53
   6   0   5   92.52    8.45
  -5   0  -5  203.80   19.39
   5   0   5  196.29   13.76
  -4   0  -5  333.53   19.41
   4   0   5  353.61   18.95
  -3   0  -5  846.93   21.25
   3   0   5  823.57   20.73
  -2   0  -520253.04   98.11
   2   0   520276.23   97.96
  -1   0  -5  -22.86   15.67
   1   0   5    5.76   15.20
   0   0  -5  349.46   17.34
   0   0   5  287.90   18.18
   1   0  -5  352.16   18.66
  -1   0   5  327.32   18.88
   2   0  -5  427.69   19.75
  -2   0   5  415.84   19.95
   3   0  -5   -8.89   17.33
  -3   0   5  -12.51   17.51
   4   0  -5   26.19    8.55
  -4   0   5   38.24    8.53
   5   0  -5  326.81   23.05
  -5   0   5  309.34   24.45
   6   0  -5  123.38   10.85
  -6   0   5  157.79   13.99
   7   0  -5  642.84   32.27
  -7   0   5  665.17   32.45
   8   0  -5  -55.85   28.85
  -8   0   5  -10.59   28.06
   9   0  -5  -35.90   29.71
  -9   0   5  -19.88   30.50
  10   0  -5   51.20   13.39
 -10   0   5   42.40   30.57
  11   0  -5   18.38   32.21
 -11   0   5    1.45   32.52
  12   0  -5   41.14   15.60
 -12   0   5   32.13   35.30
  13   0  -5  -42.92   35.24
 -13   0   5   31.68   33.42
  14   0  -5  -20.83   51.56
 -14   0   5   33.27   35.59
 -17   0  -6  -63.97   56.32
  17   0   6  -30.98   53.16
 -16   0  -6  -31.19   36.19
  16   0   6  -58.59   37.82
 -15   0  -6  -21.19   33.80
  15   0   6   31.50   33.86
 -14   0  -6   89.44   14.91
  14   0   6  101.44   14.71
 -13   0  -6   19.06   30.63
  13   0   6  -52.73   31.43
 -12   0  -6   20.13   29.66
  12   0   6   36.94   29.42
 -11   0  -6  102.53   12.71
  11   0   6  125.80   12.80
 -10   0  -6  -18.52   25.89
  10   0   6    7.46   14.63
  -9   0  -6   -9.15   22.68
   9   0   6   26.63   23.04
  -8   0  -6  180.22   15.98
   8   0   6  175.86   15.62
  -7   0  -6  168.40   15.22
   7   0   6  203.45   14.67
  -6   0  -6  493.93   21.92
   6   0   6  460.89   22.27
  -5   0  -6 1305.37   26.70
   5   0   6 1326.16   26.50
  -4   0  -6  450.06   21.04
   4   0   6  456.77   21.53
  -3   0  -6 3196.17   33.35
   3   0   6 3318.14   33.66
  -2   0  -6  347.39   20.65
   2   0   6  155.93   14.07
  -1   0  -6   18.12   17.62
   1   0   6  -15.26   18.32
   0   0  -6   17.46   17.70
   0   0   6  -23.83   18.35
   1   0  -6   63.11    7.80
  -1   0   6   39.18    8.03
   2   0  -6   49.76    7.86
  -2   0   6   53.66    7.91
   3   0  -6  288.13   19.71
  -3   0   6  275.76   19.52
   4   0  -6  147.17   12.17
  -4   0   6  127.37   10.66
   5   0  -6  210.13   17.29
  -5   0   6  288.01   23.17
   6   0  -6   67.63   11.50
  -6   0   6   67.42   11.68
   7   0  -6  -21.98   27.15
  -7   0   6    3.74   28.02
   8   0  -6  162.98   15.63
  -8   0   6  179.19   17.80
   9   0  -6    2.47   29.35
  -9   0   6    9.82   29.44
  10   0  -6   -6.36   31.96
 -10   0   6  -14.46   31.23
  11   0  -6  -25.14   32.77
 -11   0   6   33.02   22.51
  12   0  -6   13.44   23.80
 -12   0   6   48.22   32.40
  13   0  -6  -25.30   52.83
 -13   0   6  -17.63   51.43
  14   0  -6   52.40   50.50
 -14   0   6  -35.26   54.92
 -17   0  -7   33.56   52.55
  17   0   7  -22.82   53.14
 -16   0  -7    4.03   36.57
  16   0   7  -25.20   36.53
 -15   0  -7   17.36   18.92
  15   0   7  -51.39   35.32
 -14   0  -7  -16.82   32.31
  14   0   7   35.88   29.44
 -13   0  -7   26.55   30.49
  13   0   7    5.18   31.25
 -12   0  -7   23.62   21.28
  12   0   7  -18.26   29.88
 -11   0  -7   38.38   29.71
  11   0   7   67.55   12.71
 -10   0  -7   22.29   26.27
  10   0   7    6.86   26.19
  -9   0  -7    7.01   23.03
   9   0   7    1.52   23.81
  -8   0  -7  606.84   27.72
   8   0   7  538.38   28.98
  -7   0  -7   91.70    9.40
   7   0   7   87.70    9.60
  -6   0  -7    2.28   19.87
   6   0   7   13.69   20.09
  -5   0  -7 1049.53   26.03
   5   0   7 1084.18   25.98
  -4   0  -7  114.27   11.15
   4   0   7  168.07   13.69
  -3   0  -7  591.05   21.59
   3   0   7  578.48   22.10
  -2   0  -7  -44.92   19.74
   2   0   7  -10.30   19.27
  -1   0  -7   18.69   19.64
   1   0   7   30.61    8.74
   0   0  -7  139.43   11.41
   0   0   7  129.59   11.41
   1   0  -7  391.03   21.67
  -1   0   7  380.64   20.98
   2   0  -7   19.98    8.07
  -2   0   7   25.62   17.83
   3   0  -7  145.39   13.95
  -3   0   7  127.83   11.51
   4   0  -7  -12.82   21.29
  -4   0   7  -26.32   21.56
   5   0  -7   25.45   23.51
  -5   0   7   34.17   22.90
   6   0  -7  345.75   30.78
  -6   0   7  339.61   30.87
   7   0  -7  -28.90   29.91
  -7   0   7   34.87   28.47
   8   0  -7   25.67   31.70
  -8   0   7   62.22   13.31
   9   0  -7   41.63   31.26
  -9   0   7   23.21   14.63
  10   0  -7   46.84   32.10
 -10   0   7   49.50   14.04
  11   0  -7   25.05   17.34
 -11   0   7   18.53   34.60
  12   0  -7   11.89   35.19
 -12   0   7  -11.76   36.54
  13   0  -7   45.17   51.88
 -13   0   7   85.22   23.40
 -17   0  -8   36.26   50.35
  17   0   8  -20.82   53.20
 -16   0  -8  -27.32   35.58
  16   0   8   -8.18   35.19
 -15   0  -8  -60.19   34.36
  15   0   8   -8.42   33.38
 -14   0  -8   11.91   31.43
  14   0   8  -36.11   32.57
 -13   0  -8   69.70   14.05
  13   0   8   35.11   32.89
 -12   0  -8   21.95   13.09
  12   0   8   -3.78   30.85
 -11   0  -8   -6.14   27.94
  11   0   8   25.31   19.24
 -10   0  -8  328.03   27.95
  10   0   8  284.61   20.67
  -9   0  -8   15.90   24.83
   9   0   8   30.76   25.13
  -8   0  -8    1.63   16.76
   8   0   8   15.16   16.49
  -7   0  -8  239.14   16.49
   7   0   8  271.26   22.98
  -6   0  -8 2953.15   39.52
   6   0   8 3000.92   40.26
  -5   0  -8   -7.51   19.38
   5   0   8    4.28   19.22
  -4   0  -8  809.61   25.91
   4   0   8  817.92   24.80
  -3   0  -8 1482.68   28.92
   3   0   8 1454.84   28.69
  -2   0  -8  226.03   19.93
   2   0   8  234.45   19.89
  -1   0  -8  160.88   13.73
   1   0   8  124.90   11.47
   0   0  -8  403.94   21.97
   0   0   8  388.38   21.92
   1   0  -8  357.32   22.00
  -1   0   8  307.15   21.98
   2   0  -8   91.70    9.15
  -2   0   8   95.89    9.21
   3   0  -8   56.70    9.30
  -3   0   8   45.68    9.14
   4   0  -8   28.92   22.15
  -4   0   8   40.74    9.71
   5   0  -8   19.27   14.63
  -5   0   8   27.73   24.60
   6   0  -8   16.75   28.21
  -6   0   8   42.67   12.50
   7   0  -8   19.89   30.17
  -7   0   8  -19.58   30.75
   8   0  -8    6.27   29.96
  -8   0   8   21.07   15.15
   9   0  -8   -9.57   32.61
  -9   0   8  -33.43   33.06
  10   0  -8   30.72   14.91
 -10   0   8  -47.27   35.24
  11   0  -8   -3.39   35.24
 -11   0   8    2.53   34.12
  12   0  -8   56.49   49.77
 -12   0   8   43.92   35.17
  13   0  -8  -48.61   59.07
 -13   0   8   51.26   55.80
 -17   0  -9   72.83   51.28
  17   0   9   44.05   50.78
 -16   0  -9  -39.55   34.42
  16   0   9  -26.69   33.50
 -15   0  -9   -5.95   32.75
  15   0   9   43.72   31.81
 -14   0  -9    9.48   31.92
  14   0   9  -56.53   32.86
 -13   0  -9   14.15   29.71
  13   0   9  -38.09   31.63
 -12   0  -9   37.69   28.38
  12   0   9   10.04   30.45
 -11   0  -9  -57.91   30.39
  11   0   9   14.28   27.63
 -10   0  -9   22.98   19.58
  10   0   9   17.13   27.99
  -9   0  -9   30.02   11.17
   9   0   9    4.96   17.69
  -8   0  -9  -17.87   24.41
   8   0   9   -9.54   23.96
  -7   0  -9  474.24   26.61
   7   0   9  465.36   28.44
  -6   0  -9  138.51   11.57
   6   0   9  171.54   15.80
  -5   0  -9  940.15   27.37
   5   0   9  895.67   28.37
  -4   0  -9 1377.84   31.26
   4   0   9 1383.60   30.83
  -3   0  -9    0.55   14.50
   3   0   9  -76.49   22.53
  -2   0  -9  -30.27   20.78
   2   0   9 -158.19   23.04
  -1   0  -9  -11.43   19.65
   1   0   9  -55.87   20.38
   0   0  -9   -1.62   20.64
   0   0   9  -19.65   20.51
   1   0  -9    7.83   22.62
  -1   0   9   23.92    9.52
   2   0  -9    6.32   24.13
  -2   0   9   69.63    9.96
   3   0  -9   35.98   10.21
  -3   0   9   13.37   23.67
   4   0  -9  186.56   17.37
  -4   0   9  173.89   14.52
   5   0  -9   28.46   11.93
  -5   0   9   17.29   27.20
   6   0  -9   25.02   20.89
  -6   0   9   31.96   29.16
   7   0  -9  102.83   14.78
  -7   0   9   94.50   14.60
   8   0  -9  -22.73   33.14
  -8   0   9  -56.19   32.41
   9   0  -9   38.74   31.73
  -9   0   9   21.38   14.32
  10   0  -9   29.96   33.87
 -10   0   9   46.83   34.90
  11   0  -9  -28.56   52.94
 -11   0   9   30.08   49.91
  12   0  -9    8.43   52.11
 -12   0   9  -43.07   54.56
 -17   0 -10   -7.92   49.52
  17   0  10   32.62   50.87
 -16   0 -10  -75.77   49.54
  16   0  10   13.79   45.42
 -15   0 -10   13.16   34.14
  15   0  10  -16.73   34.88
 -14   0 -10   27.49   30.98
  14   0  10    7.87   32.02
 -13   0 -10   25.00   30.31
  13   0  10    9.18   17.39
 -12   0 -10   32.59   29.93
  12   0  10   66.41   13.55
 -11   0 -10   29.01   28.01
  11   0  10  -35.84   30.16
 -10   0 -10   42.51   12.63
  10   0  10   18.44   16.89
  -9   0 -10  253.29   20.04
   9   0  10  227.85   20.73
  -8   0 -10   -5.92   25.36
   8   0  10   24.15   24.87
  -7   0 -10   18.16   22.47
   7   0  10    5.87   23.02
  -6   0 -10  647.53   28.87
   6   0  10  650.92   28.99
  -5   0 -10   14.51   21.87
   5   0  10   31.64   21.93
  -4   0 -10 1975.39   36.09
   4   0  10 1956.58   36.48
  -3   0 -10  401.78   24.24
   3   0  10  400.97   23.66
  -2   0 -10  290.13   23.51
   2   0  10  288.12   23.75
  -1   0 -10   21.60   20.83
   1   0  10    4.10   21.44
   0   0 -10  117.76   10.39
   0   0  10  112.01   10.44
   1   0 -10  265.71   25.47
  -1   0  10  253.09   24.49
   2   0 -10   40.28   10.83
  -2   0  10   25.03   24.18
   3   0 -10   77.64   11.48
  -3   0  10   54.77   11.84
   4   0 -10  -19.58   25.92
  -4   0  10  -29.09   25.64
   5   0 -10  131.10   12.60
  -5   0  10  146.22   12.59
   6   0 -10    6.96   28.82
  -6   0  10    4.59   28.58
   7   0 -10  -66.09   33.21
  -7   0  10  -36.06   31.63
   8   0 -10  -48.83   33.09
  -8   0  10   -8.30   33.44
   9   0 -10   46.48   33.78
  -9   0  10   45.24   14.73
  10   0 -10    0.20   34.39
 -10   0  10   31.87   15.32
  11   0 -10   26.75   49.37
 -11   0  10  -59.52   49.38
  12   0 -10   48.11   55.10
 -12   0  10   31.31   59.54
 -17   0 -11   31.62   50.83
  17   0  11   18.56   54.65
 -16   0 -11  -53.18   49.73
  16   0  11   44.30   50.02
 -15   0 -11   12.12   33.26
  15   0  11   43.26   30.97
 -14   0 -11   24.45   22.14
  14   0  11   33.88   22.85
 -13   0 -11   31.89   30.30
  13   0  11   -8.65   32.20
 -12   0 -11   31.95   30.57
  12   0  11   21.56   31.23
 -11   0 -11    4.35   30.44
  11   0  11   56.33   12.99
 -10   0 -11  150.14   14.87
  10   0  11  109.60   13.54
  -9   0 -11   12.13   27.76
   9   0  11   10.68   26.45
  -8   0 -11  -11.09   24.99
   8   0  11    9.91   26.59
  -7   0 -11  181.58   15.77
   7   0  11  165.41   13.30
  -6   0 -11  155.59   15.07
   6   0  11  154.12   14.70
  -5   0 -11  373.13   26.72
   5   0  11  340.71   27.76
  -4   0 -11    4.59   24.06
   4   0  11 -101.97   26.55
  -3   0 -11    7.54   24.70
   3   0  11 -179.34   28.38
  -2   0 -11  -10.71   23.88
   2   0  11 -113.97   26.29
  -1   0 -11   31.38   24.25
   1   0  11   27.91   24.34
   0   0 -11   -0.15   24.90
   0   0  11   35.70   24.48
   1   0 -11   -5.98   25.25
  -1   0  11  -30.99   25.55
   2   0 -11  -27.20   28.32
  -2   0  11   12.13   26.20
   3   0 -11  -11.05   27.26
  -3   0  11   33.14   24.64
   4   0 -11  233.37   21.04
  -4   0  11  223.60   21.00
   5   0 -11   23.95   12.39
  -5   0  11  -12.10   27.84
   6   0 -11   -9.62   29.75
  -6   0  11   39.32   29.12
   7   0 -11   30.46   32.39
  -7   0  11   28.01   31.42
   8   0 -11   17.48   33.25
  -8   0  11   22.92   33.62
   9   0 -11   52.01   15.77
  -9   0  11   55.93   15.57
  10   0 -11  -97.08   56.06
 -10   0  11   25.83   49.40
  11   0 -11   13.95   50.75
 -11   0  11   31.57   52.38
 -17   0 -12   27.63   52.86
  17   0  12   33.91   29.28
 -16   0 -12  -79.23   54.39
  16   0  12   -8.73   50.95
 -15   0 -12  -48.20   35.45
  15   0  12   27.96   32.36
 -14   0 -12  -30.40   34.03
  14   0  12   26.13   31.41
 -13   0 -12   32.34   31.79
  13   0  12  -28.34   32.25
 -12   0 -12  -11.48   31.15
  12   0  12    1.52   30.14
 -11   0 -12   -8.14   30.97
  11   0  12   -2.88   30.72
 -10   0 -12   38.54   31.67
  10   0  12  106.92   13.21
  -9   0 -12  -15.19   28.89
   9   0  12   -3.74   27.80
  -8   0 -12   25.18   19.62
   8   0  12   44.28   12.39
  -7   0 -12  147.86   14.48
   7   0  12  196.37   16.58
  -6   0 -12    5.32   25.45
   6   0  12   24.86   25.51
  -5   0 -12   88.36   11.75
   5   0  12  102.41   11.84
  -4   0 -12   59.62   11.55
   4   0  12    6.94   26.26
  -3   0 -12   75.38   11.17
   3   0  12   55.98   11.52
  -2   0 -12  100.27   11.46
   2   0  12   82.30   11.61
  -1   0 -12   15.57   12.08
   1   0  12   19.42   27.29
   0   0 -12   -5.56   26.70
   0   0  12   -9.37   27.03
   1   0 -12   66.64   12.64
  -1   0  12   83.00   12.30
   2   0 -12   84.00   12.51
  -2   0  12   31.79   29.95
   3   0 -12   34.98   12.77
  -3   0  12   17.98   13.96
   4   0 -12   37.61   29.06
  -4   0  12   25.22   13.26
   5   0 -12  -10.96   28.21
  -5   0  12  -42.76   30.19
   6   0 -12  -23.91   29.86
  -6   0  12  -16.10   29.96
   7   0 -12   59.12   14.89
  -7   0  12   85.32   14.49
   8   0 -12   12.20   36.77
  -8   0  12   -5.97   34.95
   9   0 -12   73.89   23.16
  -9   0  12  -22.72   55.60
  10   0 -12  -37.45   59.88
 -10   0  12    1.01   55.09
 -17   0 -13  -28.87   57.47
  17   0  13  -14.34   49.09
 -16   0 -13  -31.43   52.16
  16   0  13   10.14   47.88
 -15   0 -13   33.16   25.25
  15   0  13   29.90   34.81
 -14   0 -13   34.90   30.15
  14   0  13  -45.98   33.85
 -13   0 -13  -56.28   33.16
  13   0  13  -11.72   32.93
 -12   0 -13   97.59   14.55
  12   0  13  105.51   14.46
 -11   0 -13  -19.66   32.36
  11   0  13   14.31   31.28
 -10   0 -13   35.76   27.40
  10   0  13   30.80   28.45
  -9   0 -13   20.38   12.54
   9   0  13    2.32   29.09
  -8   0 -13  162.45   15.39
   8   0  13  147.27   13.93
  -7   0 -13   26.28   27.23
   7   0  13   31.27   12.59
  -6   0 -13   96.71   12.71
   6   0  13   29.71   29.10
  -5   0 -13  332.91   30.87
   5   0  13  383.81   29.51
  -4   0 -13   52.27   12.78
   4   0  13   70.00   12.76
  -3   0 -13   46.55   13.00
   3   0  13   17.76   29.39
  -2   0 -13   31.81   27.23
   2   0  13   15.02   26.66
  -1   0 -13  355.42   31.12
   1   0  13  327.07   22.20
   0   0 -13   34.51   28.29
   0   0  13   36.04   28.48
   1   0 -13   93.45   13.41
  -1   0  13   95.16   13.22
   2   0 -13   37.95   13.30
  -2   0  13   57.21   12.95
   3   0 -13   -6.19   30.62
  -3   0  13   21.20   30.71
   4   0 -13   29.76   13.44
  -4   0  13   -3.01   30.65
   5   0 -13   81.78   13.08
  -5   0  13   11.30   32.55
   6   0 -13   29.17   30.26
  -6   0  13   48.30   13.29
   7   0 -13   -1.96   34.04
  -7   0  13   44.52   32.44
   8   0 -13   62.67   48.06
  -8   0  13   43.99   43.59
   9   0 -13    0.00   50.81
  -9   0  13    8.45   52.24
 -16   0 -14  -63.85   51.27
  16   0  14  -12.23   51.71
 -15   0 -14    3.03   49.73
  15   0  14   33.99   48.66
 -14   0 -14  -14.26   35.59
  14   0  14   -5.16   35.06
 -13   0 -14    0.16   31.50
  13   0  14   -6.26   33.28
 -12   0 -14  -51.35   33.64
  12   0  14   12.35   22.04
 -11   0 -14  -28.90   31.54
  11   0  14   31.77   30.78
 -10   0 -14    7.99   29.56
  10   0  14  -37.56   31.42
  -9   0 -14   -6.82   29.48
   9   0  14   26.12   29.11
  -8   0 -14   45.42   30.92
   8   0  14   87.54   13.48
  -7   0 -14  -56.71   31.08
   7   0  14   -4.94   20.72
  -6   0 -14   88.02   13.12
   6   0  14   71.94   13.32
  -5   0 -14   98.81   13.57
   5   0  14  109.39   13.26
  -4   0 -14   79.97   13.22
   4   0  14   21.80   30.56
  -3   0 -14  313.97   23.99
   3   0  14  322.77   24.15
  -2   0 -14  -38.16   31.96
   2   0  14  -42.67   29.53
  -1   0 -14   25.19   14.13
   1   0  14   23.78   31.98
   0   0 -14   -9.58   30.41
   0   0  14   23.77   28.96
   1   0 -14   25.63   22.05
  -1   0  14  -20.62   31.75
   2   0 -14   36.09   31.91
  -2   0  14   48.17   13.52
   3   0 -14   -8.90   31.10
  -3   0  14   -7.78   31.37
   4   0 -14  -23.77   32.18
  -4   0  14   31.04   28.67
   5   0 -14   13.71   34.61
  -5   0  14   11.31   35.02
   6   0 -14   29.13   13.73
  -6   0  14   -0.29   31.19
   7   0 -14   11.91   44.04
  -7   0  14   58.98   42.57
   8   0 -14  -15.73   51.43
  -8   0  14  -49.89   58.10
 -16   0 -15    5.27   53.64
  16   0  15   45.91   50.17
 -15   0 -15   47.52   49.88
  15   0  15   11.43   49.73
 -14   0 -15  -70.97   36.20
  14   0  15    7.79   23.87
 -13   0 -15    1.46   33.83
  13   0  15   15.97   32.56
 -12   0 -15   21.42   16.56
  12   0  15   18.77   22.74
 -11   0 -15   59.40   14.30
  11   0  15   22.90   32.84
 -10   0 -15   -1.74   30.83
  10   0  15    1.29   31.54
  -9   0 -15   -9.16   30.23
   9   0  15   28.37   28.13
  -8   0 -15   66.32   13.98
   8   0  15   94.60   13.52
  -7   0 -15   26.90   33.18
   7   0  15   59.27   14.21
  -6   0 -15  178.43   15.84
   6   0  15  142.19   14.54
  -5   0 -15   35.86   31.55
   5   0  15   40.94   31.69
  -4   0 -15  159.90   15.94
   4   0  15  136.12   14.55
  -3   0 -15  393.76   26.05
   3   0  15  383.65   36.18
  -2   0 -15  246.90   23.95
   2   0  15  290.39   23.47
  -1   0 -15   14.05   21.36
   1   0  15  -55.90   32.14
   0   0 -15   95.10   14.17
   0   0  15   90.56   13.89
   1   0 -15  -20.82   31.53
  -1   0  15   16.98   30.52
   2   0 -15    7.37   30.97
  -2   0  15  -38.66   32.31
   3   0 -15  150.40   15.27
  -3   0  15  125.56   15.54
   4   0 -15    8.24   31.50
  -4   0  15   28.78   32.42
   5   0 -15   13.65   32.88
  -5   0  15   32.82   15.23
   6   0 -15 -101.86   52.03
  -6   0  15   25.90   32.10
   7   0 -15   42.80   43.83
  -7   0  15   34.23   46.29
 -16   0 -16  -71.67   59.79
  16   0  16   19.12   54.92
 -15   0 -16   38.69   49.15
  15   0  16  -76.03   56.04
 -14   0 -16  -71.96   53.41
  14   0  16  -11.75   47.69
 -13   0 -16   20.00   34.27
  13   0  16    9.62   35.49
 -12   0 -16   43.20   14.72
  12   0  16    4.68   33.75
 -11   0 -16   26.80   31.83
  11   0  16   14.56   33.15
 -10   0 -16  -14.41   30.77
  10   0  16  -38.82   32.41
  -9   0 -16  -27.21   30.75
   9   0  16   20.38   17.15
  -8   0 -16    6.87   29.35
   8   0  16  -19.18   30.56
  -7   0 -16  213.36   19.71
   7   0  16  222.50   19.95
  -6   0 -16   14.68   31.10
   6   0  16   28.77   30.46
  -5   0 -16  121.93   14.74
   5   0  16  107.04   14.83
  -4   0 -16  -21.05   31.94
   4   0  16    5.76   32.77
  -3   0 -16    0.58   31.38
   3   0  16  -89.07   34.62
  -2   0 -16  -22.37   32.36
   2   0  16  -27.09   33.43
  -1   0 -16    7.35   30.52
   1   0  16  -14.64   30.72
   0   0 -16   33.73   23.11
   0   0  16  -57.50   33.13
   1   0 -16    3.72   32.23
  -1   0  16  -32.98   32.42
   2   0 -16   24.61   32.18
  -2   0  16   -6.18   34.31
   3   0 -16  -20.88   33.38
  -3   0  16  -65.40   35.08
   4   0 -16  -45.85   36.45
  -4   0  16   27.93   32.89
   5   0 -16    2.33   51.89
  -5   0  16   32.86   23.61
   6   0 -16  -60.66   52.11
  -6   0  16   38.60   44.66
 -15   0 -17   56.31   45.40
  15   0  17 -127.22   57.94
 -14   0 -17  -66.13   49.78
  14   0  17  -40.63   53.72
 -13   0 -17  -12.98   50.36
  13   0  17  -14.95   48.74
 -12   0 -17  -24.38   38.09
  12   0  17   55.73   14.97
 -11   0 -17   -7.90   34.58
  11   0  17  -11.64   34.69
 -10   0 -17  -17.51   34.89
  10   0  17   37.55   14.45
  -9   0 -17   -8.29   31.40
   9   0  17   15.37   15.60
  -8   0 -17   31.16   32.17
   8   0  17   45.66   32.22
  -7   0 -17   72.02   15.07
   7   0  17   84.00   14.71
  -6   0 -17   17.36   31.64
   6   0  17  -16.04   32.90
  -5   0 -17  101.88   15.00
   5   0  17   98.65   15.17
  -4   0 -17  -31.99   32.38
   4   0  17  -28.85   32.08
  -3   0 -17   18.99   33.68
   3   0  17   37.80   32.37
  -2   0 -17   -3.67   34.71
   2   0  17   48.19   32.94
  -1   0 -17  -29.16   33.78
   1   0  17   26.32   32.43
   0   0 -17   35.53   34.33
   0   0  17  -10.54   35.33
   1   0 -17   53.78   15.24
  -1   0  17   25.84   35.15
   2   0 -17  -39.33   36.24
  -2   0  17   15.63   34.54
   3   0 -17   27.07   26.91
  -3   0  17  -50.26   49.20
   4   0 -17   26.75   49.38
  -4   0  17   20.98   54.20
   5   0 -17   24.11   54.00
  -5   0  17  -39.49   55.12
 -14   0 -18  -67.32   57.94
  14   0  18    8.20   54.24
 -13   0 -18  -33.94   53.56
  13   0  18   25.29   50.27
 -12   0 -18  -32.02   51.30
  12   0  18   19.76   34.88
 -11   0 -18   39.63   33.64
  11   0  18   28.36   32.39
 -10   0 -18    5.06   34.52
  10   0  18   32.07   31.13
  -9   0 -18   36.01   32.37
   9   0  18 -105.68   35.90
  -8   0 -18    5.86   34.72
   8   0  18  -30.38   34.13
  -7   0 -18    6.93   33.47
   7   0  18   22.53   24.15
  -6   0 -18   45.12   32.48
   6   0  18   71.88   14.59
  -5   0 -18   87.99   15.23
   5   0  18   46.85   15.95
  -4   0 -18  -40.15   34.43
   4   0  18   -5.14   31.78
  -3   0 -18   48.31   35.60
   3   0  18   54.85   15.79
  -2   0 -18  -15.09   32.45
   2   0  18  -10.39   33.77
  -1   0 -18   63.07   15.30
   1   0  18   63.22   15.16
   0   0 -18   -4.30   34.53
   0   0  18   22.30   34.04
   1   0 -18   26.97   33.85
  -1   0  18   13.86   34.53
   2   0 -18    6.28   53.36
  -2   0  18  -15.96   48.66
   3   0 -18   40.12   36.86
  -3   0  18   21.80   36.60
   4   0 -18   36.29   52.21
  -4   0  18  -62.26   56.29
 -13   0 -19   11.79   29.61
  13   0  19   54.18   52.17
 -12   0 -19  -29.37   51.43
  12   0  19   -4.70   48.32
 -11   0 -19   52.76   47.76
  11   0  19  -15.07   50.91
 -10   0 -19   25.95   48.51
  10   0  19  -48.73   53.08
  -9   0 -19   22.21   32.15
   9   0  19  -12.97   35.92
  -8   0 -19   37.12   33.03
   8   0  19    1.03   34.77
  -7   0 -19    6.28   33.01
   7   0  19   10.57   32.85
  -6   0 -19  -11.59   35.14
   6   0  19   40.97   32.89
  -5   0 -19   25.53   33.23
   5   0  19  -18.49   35.74
  -4   0 -19   23.60   32.69
   4   0  19   45.83   33.67
  -3   0 -19  -16.38   33.53
   3   0  19  -33.19   35.33
  -2   0 -19   41.87   15.61
   2   0  19   47.03   15.33
  -1   0 -19   -5.27   45.65
   1   0  19   63.08   48.18
   0   0 -19  -12.50   54.01
   0   0  19   39.20   49.18
   1   0 -19   10.75   49.25
  -1   0  19  -16.79   54.91
   2   0 -19  -12.99   56.17
  -2   0  19  -54.06   53.05
 -12   0 -20   62.01   52.40
  12   0  20    8.26   51.93
 -11   0 -20   40.75   47.86
  11   0  20   20.57   28.08
 -10   0 -20 -126.96   54.20
  10   0  20  -63.48   51.00
  -9   0 -20  -33.56   53.55
   9   0  20  -53.82   53.69
  -8   0 -20  -31.17   51.20
   8   0  20   58.23   49.18
  -7   0 -20   -9.26   49.00
   7   0  20   48.14   50.10
  -6   0 -20   15.80   53.42
   6   0  20  -34.42   53.42
  -5   0 -20  -16.50   57.59
   5   0  20   68.03   57.17
  -4   0 -20   -1.55   50.99
   4   0  20   66.81   46.34
  -3   0 -20   42.06   33.03
   3   0  20  -21.12   49.68
  -2   0 -20  -56.33   55.40
   2   0  20   67.72   48.99
  -1   0 -20  -12.20   53.33
   1   0  20 -110.46   56.49
   0   0 -20   19.85   55.65
   0   0  20   55.40   47.14
   1   0 -20 -104.41   59.83
  -1   0  20  -16.12   53.10
 -10   0 -21   49.45   50.32
  10   0  21   40.95   50.14
  -9   0 -21  125.72   24.15
   9   0  21   85.86   57.27
  -8   0 -21   33.82   53.83
   8   0  21  -61.11   55.88
  -7   0 -21  -20.44   51.71
   7   0  21  -81.73   58.35
  -6   0 -21   41.71   49.95
   6   0  21  -43.51   55.10
  -5   0 -21  -42.14   53.71
   5   0  21  -52.51   57.26
  -4   0 -21  -29.39   52.11
   4   0  21   -8.69   48.87
  -3   0 -21    8.14   51.23
   3   0  21  -36.45   49.03
  -2   0 -21   25.43   50.64
   2   0  21  -65.80   55.64
   2  -1  21  -35.31   55.78
   3  -1  21   31.27   51.89
   4  -1  21   37.09   23.47
   5  -1  21   37.03   47.71
   6  -1  21   54.04   47.33
   7  -1  21  -23.21   55.53
   8  -1  21   38.76   48.83
   9  -1  21  107.52   22.88
  10  -1  21  -43.26   55.21
  -1  -1  20  -13.14   55.75
   0  -1  20   46.46   55.06
   1  -1  20  -19.02   52.17
   2  -1  20    8.63   50.39
   3  -1  20  -48.41   54.12
   4  -1  20  -12.53   50.50
   5  -1  20   -6.01   51.33
   6  -1  20  -66.58   54.20
   7  -1  20  -25.23   49.14
   8  -1  20  -41.18   51.46
   9  -1  20    6.90   50.50
  10  -1  20    7.42   52.33
  11  -1  20   44.00   34.65
  12  -1  20   18.40   51.42
  -2  -1  19  -85.54   55.92
  -1  -1  19  -31.43   53.10
   0  -1  19   11.38   50.88
   1  -1  19  -89.04   55.42
   2  -1  19   45.39   35.61
   3  -1  19   25.43   37.24
   4  -1  19   42.35   36.71
   5  -1  19   23.98   35.35
   6  -1  19   -0.55   34.74
   7  -1  19   24.96   35.17
   8  -1  19   22.88   16.86
   9  -1  19   31.68   33.90
  10  -1  19  -24.32   51.34
  11  -1  19  -32.46   51.08
  12  -1  19  -21.06   48.55
  13  -1  19  -24.32   53.67
  -4  -1  18   51.64   55.47
  -3  -1  18  -22.84   51.43
  -2  -1  18   13.32   50.85
  -1  -1  18    2.52   33.85
   0  -1  18  -42.85   35.01
   1  -1  18   -1.80   37.01
   2  -1  18   41.72   31.91
   3  -1  18  -20.00   33.49
   4  -1  18   -8.84   32.68
   5  -1  18   83.20   14.77
   6  -1  18  -56.38   33.87
   7  -1  18   24.74   32.35
   8  -1  18  -31.54   34.46
   9  -1  18   35.53   32.71
  10  -1  18  -20.14   34.59
  11  -1  18   16.86   32.42
  12  -1  18  -19.14   47.79
  13  -1  18   11.02   48.90
  14  -1  18  -69.61   56.89
  -5  -1  17  -25.48   55.79
  -4  -1  17  -18.11   52.83
  -3  -1  17   68.16   48.81
  -2  -1  17   39.11   33.95
  -1  -1  17  -52.64   36.25
   0  -1  17  -17.54   34.45
   1  -1  17  -82.72   35.12
   2  -1  17  -33.02   33.82
   3  -1  17  -21.63   32.48
   4  -1  17   87.20   14.47
   5  -1  17  -23.87   33.25
   6  -1  17   22.71   31.37
   7  -1  17  112.96   14.84
   8  -1  17    6.79   30.25
   9  -1  17   19.76   32.33
  10  -1  17  -31.92   32.42
  11  -1  17  -20.63   32.75
  12  -1  17  -11.90   33.51
  13  -1  17   35.84   45.99
  14  -1  17    1.35   54.07
  15  -1  17   37.57   33.75
  -6  -1  16   41.53   45.31
  -5  -1  16   20.68   56.10
  -4  -1  16  -56.65   35.56
  -3  -1  16   42.71   35.30
  -2  -1  16   20.37   19.68
  -1  -1  16  168.81   15.53
   0  -1  16    7.72   31.27
   1  -1  16  -19.81   32.12
   2  -1  16   32.94   30.42
   3  -1  16   16.42   30.83
   4  -1  16   -8.35   31.88
   5  -1  16   94.10   15.34
   6  -1  16   18.12   17.91
   7  -1  16  126.68   14.57
   8  -1  16  -43.31   31.52
   9  -1  16    1.23   30.38
  10  -1  16   36.42   30.53
  11  -1  16  -12.48   32.97
  12  -1  16  -22.54   33.73
  13  -1  16    6.26   36.95
  14  -1  16  -33.52   50.10
  15  -1  16    0.93   49.74
  -7  -1  15  -36.80   49.61
  -6  -1  15  -15.53   50.84
  -5  -1  15  -10.40   35.03
  -4  -1  15  -17.95   35.26
  -3  -1  15   88.51   15.33
  -2  -1  15    9.71   31.70
  -1  -1  15  -48.82   35.98
   0  -1  15   -5.86   30.21
   1  -1  15  -26.32   32.04
   2  -1  15   -9.55   30.68
   3  -1  15  -90.10   34.70
   4  -1  15  125.74   14.12
   5  -1  15  186.40   18.47
   6  -1  15  130.48   14.26
   7  -1  15  -48.31   32.44
   8  -1  15   29.02   29.09
   9  -1  15  -12.59   29.89
  10  -1  15    0.95   30.00
  11  -1  15   11.75   30.25
  12  -1  15   -5.96   34.26
  13  -1  15   35.50   32.29
  14  -1  15  -11.38   34.92
  15  -1  15    4.66   48.74
  16  -1  15  -30.45   51.31
  -8  -1  14 -126.56   57.90
  -7  -1  14   34.50   43.05
  -6  -1  14  -21.07   35.06
  -5  -1  14  -88.81   35.54
  -4  -1  14   49.63   14.61
  -3  -1  14  -25.31   32.70
  -2  -1  14   39.84   32.55
  -1  -1  14  175.51   15.94
   0  -1  14  153.61   14.23
   1  -1  14  166.21   15.98
   2  -1  14   60.45   13.54
   3  -1  14  490.54   35.64
   4  -1  14   17.28   28.79
   5  -1  14   15.59   28.33
   6  -1  14  -35.68   31.03
   7  -1  14  -16.67   30.31
   8  -1  14    8.05   29.18
   9  -1  14   34.61   28.21
  10  -1  14   38.40   30.85
  11  -1  14  -28.93   30.77
  12  -1  14   26.49   22.01
  13  -1  14   19.93   16.11
  14  -1  14   13.81   34.80
  15  -1  14    9.50   48.44
  16  -1  14  -37.93   54.32
  -9  -1  13  -53.93   57.96
  -8  -1  13   29.68   25.22
  -7  -1  13   13.63   36.61
  -6  -1  13   80.65   15.21
  -5  -1  13  -17.80   31.86
  -4  -1  13   -4.32   31.40
  -3  -1  13   24.92   14.12
  -2  -1  13  175.19   16.27
  -1  -1  13   42.16   30.07
   0  -1  13   26.06   28.50
   1  -1  13  204.56   17.95
   2  -1  13   19.97   20.06
   3  -1  13  -46.59   29.68
   4  -1  13   33.82   26.66
   5  -1  13   31.41   12.37
   6  -1  13   17.96   13.53
   7  -1  13  -38.37   28.86
   8  -1  13   63.75   13.20
   9  -1  13   35.98   27.85
  10  -1  13   -2.40   30.49
  11  -1  13   -5.09   29.69
  12  -1  13   -6.80   32.63
  13  -1  13   22.78   31.47
  14  -1  13  -26.92   36.25
  15  -1  13  -17.40   49.12
  16  -1  13  -29.63   52.06
  17  -1  13   -4.63   54.61
 -10  -1  12   -9.66   57.13
  -9  -1  12  -32.33   52.07
  -8  -1  12   20.83   35.45
  -7  -1  12   28.99   34.02
  -6  -1  12   24.25   29.92
  -5  -1  12  -14.99   32.25
  -4  -1  12   21.48   29.96
  -3  -1  12   20.05   20.47
  -2  -1  12   25.75   19.52
  -1  -1  12   -1.02   29.08
   0  -1  12   22.46   27.23
   1  -1  12  -10.59   26.61
   2  -1  12  213.31   19.19
   3  -1  12  182.19   15.18
   4  -1  12   86.18   11.60
   5  -1  12  209.70   19.30
   6  -1  12  141.55   14.08
   7  -1  12   28.37   18.92
   8  -1  12  -14.08   27.08
   9  -1  12   -2.95   28.75
  10  -1  12  -68.69   29.95
  11  -1  12   39.13   31.49
  12  -1  12   39.11   28.07
  13  -1  12  -28.09   31.30
  14  -1  12   49.96   14.83
  15  -1  12    2.51   35.02
  16  -1  12   -3.57   52.42
  17  -1  12   46.54   52.83
 -11  -1  11  -13.71   55.30
 -10  -1  11    9.57   54.05
  -9  -1  11   28.16   33.42
  -8  -1  11   25.97   23.91
  -7  -1  11  158.42   15.43
  -6  -1  11  -38.36   32.05
  -5  -1  11   28.23   13.81
  -4  -1  11   43.66   13.03
  -3  -1  11  189.83   17.33
  -2  -1  11   10.46   12.05
  -1  -1  11   16.49   24.96
   0  -1  11  320.10   26.99
   1  -1  11  501.60   29.19
   2  -1  11   11.98   24.56
   3  -1  11   25.37   10.50
   4  -1  11   83.83   10.89
   5  -1  11   41.01   11.20
   6  -1  11  161.65   14.54
   7  -1  11   15.72   25.02
   8  -1  11   33.06   27.22
   9  -1  11   53.94   12.57
  10  -1  11  -28.78   30.70
  11  -1  11    6.94   31.15
  12  -1  11   15.03   17.23
  13  -1  11  -38.29   31.88
  14  -1  11   36.84   32.40
  15  -1  11   46.56   32.26
  16  -1  11   28.73   47.77
  17  -1  11  -77.26   57.38
 -12  -1  10   32.54   57.94
 -11  -1  10  -21.89   55.19
 -10  -1  10   20.62   33.69
  -9  -1  10   -0.69   34.59
  -8  -1  10  -22.43   33.55
  -7  -1  10  -18.55   33.94
  -6  -1  10    7.78   31.13
  -5  -1  10  122.11   13.17
  -4  -1  10   48.64   12.51
  -3  -1  10   17.82   13.18
  -2  -1  10   10.78   24.64
  -1  -1  10   67.45   10.33
   0  -1  10   -8.67   22.77
   1  -1  10   -0.37   22.36
   2  -1  10  111.00    9.68
   3  -1  10  -20.95   21.51
   4  -1  10 1522.92   33.51
   5  -1  10  740.83   30.10
   6  -1  10    6.72   23.09
   7  -1  10  351.97   27.47
   8  -1  10   43.34   11.30
   9  -1  10   24.75   25.56
  10  -1  10  114.48   13.04
  11  -1  10   20.50   20.93
  12  -1  10   -3.27   30.42
  13  -1  10   24.57   31.67
  14  -1  10    6.79   32.82
  15  -1  10    9.59   33.73
  16  -1  10   27.94   48.83
  17  -1  10   43.72   53.17
 -12  -1   9    6.12   36.86
 -11  -1   9  -16.54   35.75
 -10  -1   9   -1.77   34.44
  -9  -1   9    4.43   32.63
  -8  -1   9   45.02   32.73
  -7  -1   9   27.66   30.59
  -6  -1   9   39.97   30.13
  -5  -1   9   58.47   11.90
  -4  -1   9    4.58   25.21
  -3  -1   9  139.53   12.50
  -2  -1   9  207.28   17.09
  -1  -1   9   24.17    9.64
   0  -1   9   13.89   19.87
   1  -1   9  299.33   21.83
   2  -1   9   11.01   18.96
   3  -1   9   83.85    8.94
   4  -1   9   -3.04   20.77
   5  -1   9 1098.25   29.88
   6  -1   9   -7.96   22.01
   7  -1   9   11.78   24.04
   8  -1   9  505.23   31.26
   9  -1   9  177.56   15.47
  10  -1   9   23.31   28.32
  11  -1   9   14.50   28.68
  12  -1   9   30.23   30.26
  13  -1   9  -19.13   30.47
  14  -1   9   45.69   30.98
  15  -1   9   20.34   33.76
  16  -1   9  -11.82   49.55
  17  -1   9  -28.79   53.60
 -13  -1   8   36.84   37.87
 -12  -1   8   60.37   50.96
 -11  -1   8   33.55   35.71
 -10  -1   8   36.20   14.52
  -9  -1   8   33.34   30.87
  -8  -1   8  199.50   19.64
  -7  -1   8   37.41   13.79
  -6  -1   8    1.18   28.96
  -5  -1   8   48.76   11.12
  -4  -1   8   44.22   10.21
  -3  -1   8    9.27   21.59
  -2  -1   8   -2.58   20.84
  -1  -1   8    8.64   19.14
   0  -1   8   19.83   17.72
   1  -1   8   -7.34   18.19
   2  -1   8   88.93    8.49
   3  -1   8  658.27   23.15
   4  -1   8   19.57   19.33
   5  -1   8  396.14   22.71
   6  -1   8  147.20   12.59
   7  -1   8  150.17   13.51
   8  -1   8   -3.71   22.74
   9  -1   8   22.13   11.52
  10  -1   8  114.30   12.68
  11  -1   8   33.26   28.79
  12  -1   8   27.50   28.72
  13  -1   8  -18.73   31.93
  14  -1   8    4.77   29.94
  15  -1   8   42.97   33.60
  16  -1   8  -53.08   51.51
  17  -1   8    8.88   48.18
 -13  -1   7   -7.68   37.59
 -12  -1   7   28.26   34.56
 -11  -1   7  -10.68   34.65
 -10  -1   7   -3.06   31.77
  -9  -1   7  -11.77   31.96
  -8  -1   7  -13.24   30.75
  -7  -1   7   85.16   13.30
  -6  -1   7   35.23   27.18
  -5  -1   7   -9.50   24.38
  -4  -1   7  138.22   12.64
  -3  -1   7  255.57   23.24
  -2  -1   7  579.22   24.69
  -1  -1   7  218.28   20.84
   0  -1   7   35.87    8.29
   1  -1   7   44.05    8.18
   2  -1   7  -28.29   18.76
   3  -1   7  489.57   21.70
   4  -1   7  775.84   23.78
   5  -1   7  -23.74   18.42
   6  -1   7  -19.76   19.08
   7  -1   7  308.24   22.34
   8  -1   7    4.64   15.60
   9  -1   7  452.25   29.75
  10  -1   7   16.97   15.34
  11  -1   7   39.31   26.84
  12  -1   7  -53.74   30.91
  13  -1   7   60.69   14.01
  14  -1   7   -6.55   31.85
  15  -1   7   16.38   33.43
  16  -1   7   75.42   16.40
  17  -1   7  -26.62   51.67
 -14  -1   6   28.38   25.92
 -13  -1   6  -28.20   53.25
 -12  -1   6   37.02   35.11
 -11  -1   6   13.17   32.64
 -10  -1   6   35.57   30.94
  -9  -1   6  181.66   16.27
  -8  -1   6   20.08   28.49
  -7  -1   6  198.81   17.00
  -6  -1   6   36.07   24.88
  -5  -1   6  435.71   26.38
  -4  -1   6  149.84   14.78
  -3  -1   6  137.80   13.73
  -2  -1   6  -26.00   18.15
  -1  -1   6   51.11    8.19
   0  -1   6  302.00   19.21
   1  -1   6   55.30    7.94
   2  -1   6  400.10   20.11
   3  -1   6  576.97   21.27
   4  -1   6 1044.82   24.57
   5  -1   6  109.48   10.67
   6  -1   6  597.35   22.80
   7  -1   6  901.90   27.00
   8  -1   6   36.25    9.54
   9  -1   6   -5.51   24.33
  10  -1   6    1.64   26.90
  11  -1   6  126.57   12.71
  12  -1   6   19.35   29.92
  13  -1   6   19.58   30.06
  14  -1   6  120.47   15.00
  15  -1   6   20.32   34.00
  16  -1   6   17.15   49.27
  17  -1   6  -32.87   49.92
 -14  -1   5   66.52   48.15
 -13  -1   5   -0.49   36.30
 -12  -1   5   24.01   33.98
 -11  -1   5  -12.67   30.52
 -10  -1   5    3.76   22.16
  -9  -1   5   59.52   13.38
  -8  -1   5   -4.77   28.13
  -7  -1   5  267.42   19.99
  -6  -1   5   -8.86   22.80
  -5  -1   5   83.37    9.74
  -4  -1   5   54.61    8.30
  -3  -1   5   -7.59   17.49
  -2  -1   5 1029.79   23.67
  -1  -1   5  501.90   19.62
   0  -1   5  422.90   18.65
   1  -1   5   14.59    6.92
   2  -1   5 3578.51   31.27
   3  -1   5 1844.35   26.08
   4  -1   5    6.32   17.54
   5  -1   5 1218.21   25.11
   6  -1   5   26.61   18.26
   7  -1   5   58.62    8.52
   8  -1   5  123.79   11.12
   9  -1   5   22.84   22.81
  10  -1   5  116.97   12.13
  11  -1   5   10.51   27.62
  12  -1   5   30.43   29.82
  13  -1   5  -38.26   30.57
  14  -1   5  -30.09   33.47
  15  -1   5    6.02   34.28
  16  -1   5   53.72   46.52
  17  -1   5   45.50   50.04
 -15  -1   4    8.79   52.41
 -14  -1   4   -7.11   53.31
 -13  -1   4  -13.66   33.54
 -12  -1   4   23.93   33.10
 -11  -1   4  -41.03   31.44
 -10  -1   4  -28.27   31.21
  -9  -1   4  117.88   13.40
  -8  -1   4   71.68   12.23
  -7  -1   4   13.82   23.32
  -6  -1   4   73.23    9.89
  -5  -1   4  121.87   11.75
  -4  -1   4   25.67   18.35
  -3  -1   4 2247.50   29.93
  -2  -1   4   44.06    7.15
  -1  -1   4  162.05   15.24
   0  -1   4  326.68   14.99
   1  -1   4    8.32   12.23
   2  -1   4 4749.91   31.46
   3  -1   4 1155.63   20.84
   4  -1   4 1951.22   26.79
   5  -1   4  424.10   20.77
   6  -1   4  153.48   13.93
   7  -1   4   23.34    8.49
   8  -1   4   59.00    9.35
   9  -1   4  -18.11   23.43
  10  -1   4  -17.47   26.64
  11  -1   4    1.54   28.09
  12  -1   4  120.73   14.03
  13  -1   4  -19.66   32.36
  14  -1   4   35.46   30.69
  15  -1   4   76.69   15.33
  16  -1   4   41.99   50.12
  17  -1   4   25.12   50.96
 -15  -1   3   66.06   51.03
 -14  -1   3   24.40   37.19
 -13  -1   3   -8.18   34.29
 -12  -1   3  -17.49   32.95
 -11  -1   3   -9.95   31.08
 -10  -1   3  117.66   13.84
  -9  -1   3    8.39   28.17
  -8  -1   3   14.44   25.17
  -7  -1   3   31.48   21.24
  -6  -1   3  336.21   23.26
  -5  -1   3    2.47   18.34
  -4  -1   3   25.08   17.96
  -3  -1   3  360.80   18.78
  -2  -1   3 4546.90   32.41
  -1  -1   3  186.60   11.80
   0  -1   3   37.95    4.16
   1  -1   3 4567.36   25.71
   2  -1   3  277.75   12.02
   3  -1   3  230.87   13.65
   4  -1   3   58.16    7.18
   5  -1   3  119.68   10.70
   6  -1   3   41.43    8.21
   7  -1   3   22.75   18.41
   8  -1   3    5.33   11.96
   9  -1   3   23.91   10.44
  10  -1   3   97.00   12.02
  11  -1   3    5.77   27.67
  12  -1   3   55.91   13.03
  13  -1   3   32.10   32.44
  14  -1   3   -1.25   32.74
  15  -1   3   29.62   32.51
  16  -1   3   25.50   48.77
  17  -1   3  -72.33   52.11
 -16  -1   2   69.27   52.04
 -15  -1   2   28.22   35.41
 -14  -1   2  -41.46   35.12
 -13  -1   2    3.16   33.87
 -12  -1   2  -17.57   32.56
 -11  -1   2  -30.40   31.43
 -10  -1   2   39.31   12.72
  -9  -1   2    5.79   25.43
  -8  -1   2  278.93   25.88
  -7  -1   2   68.29    9.66
  -6  -1   2   65.77    8.49
  -5  -1   2  110.65    9.69
  -4  -1   2  291.37   19.57
  -3  -1   2 1695.79   23.52
  -2  -1   2 8394.74   57.01
  -1  -1   2  265.59    9.82
   0  -1   2 1368.99   13.11
   1  -1   2  161.12    7.64
   2  -1   2   -1.62    8.53
   3  -1   2   97.37    8.64
   4  -1   2  537.33   18.02
   5  -1   2   36.94    8.01
   6  -1   2   70.06    8.26
   7  -1   2  222.44   21.63
   8  -1   2    5.41   20.80
   9  -1   2  -36.39   24.90
  10  -1   2   69.99   12.17
  11  -1   2   72.56   12.82
  12  -1   2   23.05   22.34
  13  -1   2  -25.83   32.40
  14  -1   2   94.11   14.96
  15  -1   2   21.63   32.61
  16  -1   2  -85.66   54.57
  17  -1   2   42.60   49.59
 -16  -1   1   22.01   48.18
 -15  -1   1   60.91   44.76
 -14  -1   1  -33.50   35.19
 -13  -1   1  -37.37   33.34
 -12  -1   1   21.22   30.61
 -11  -1   1   29.49   28.00
 -10  -1   1  -49.54   29.75
  -9  -1   1  113.64   11.86
  -8  -1   1   16.86   23.45
  -7  -1   1   12.98   18.93
  -6  -1   1  209.91   19.24
  -5  -1   1  101.58    9.33
  -4  -1   1  144.79   12.64
  -3  -1   1  359.80   14.91
  -2  -1   1  497.79   11.59
   2  -1   1 9238.95   49.95
   3  -1   1 1024.97   17.43
   4  -1   1  251.03   18.20
   5  -1   1  847.66   23.18
   6  -1   1   39.57    8.27
   7  -1   1   25.32    8.72
   8  -1   1  203.76   17.08
   9  -1   1   87.83   11.11
  10  -1   1   32.39   26.39
  11  -1   1   64.70   13.00
  12  -1   1   76.42   14.18
  13  -1   1  -18.72   32.39
  14  -1   1   24.73   31.60
  15  -1   1  -19.50   35.28
  16  -1   1  -32.10   51.99
 -16  -1   0  -89.69   53.91
 -15  -1   0   -5.38   35.14
 -14  -1   0  -30.29   35.86
 -13  -1   0  -29.82   32.47
 -12  -1   0   -9.52   31.01
 -11  -1   0  101.70   13.40
 -10  -1   0    8.62   26.72
  -9  -1   0   82.47   11.00
  -8  -1   0   23.07   20.77
  -7  -1   0    7.71   19.27
  -6  -1   0  171.85   14.02
  -5  -1   0   79.34    8.18
  -4  -1   0   90.83    7.95
  -3  -1   0  296.31   12.79
  -2  -1   0  678.05   11.10
   2  -1   0   25.13    3.69
   3  -1   0  179.99   13.37
   4  -1   0   10.36   15.98
   5  -1   0   62.68    8.00
   6  -1   0   40.34    8.17
   7  -1   0  -14.65   19.84
   8  -1   0   67.43   10.42
   9  -1   0   12.96   24.02
  10  -1   0    7.18   28.91
  11  -1   0    4.91   30.09
  12  -1   0   28.28   30.68
  13  -1   0   35.84   30.92
  14  -1   0    9.46   24.15
  15  -1   0    3.44   51.10
  16  -1   0   -1.38   53.76
 -17  -1  -1  -40.35   56.31
 -16  -1  -1  -62.21   53.97
 -15  -1  -1  -25.99   36.31
 -14  -1  -1  -54.17   34.41
 -13  -1  -1    8.19   31.63
 -12  -1  -1   45.58   13.43
 -11  -1  -1   30.94   13.19
 -10  -1  -1    9.61   26.13
  -9  -1  -1    8.59   23.30
  -8  -1  -1   74.30    9.64
  -7  -1  -1  230.82   20.39
  -6  -1  -1  228.16   20.73
  -5  -1  -1  426.08   19.73
  -4  -1  -1 2155.90   24.67
  -3  -1  -1  145.35   11.25
  -2  -1  -1   62.11    5.03
   1  -1  -1  353.86    8.59
   2  -1  -1  228.14   11.10
   3  -1  -1 1168.83   20.30
   4  -1  -1 1066.53   23.17
   5  -1  -1   20.77   18.60
   6  -1  -1  213.92   20.13
   7  -1  -1   -5.28   20.87
   8  -1  -1  -30.06   24.40
   9  -1  -1  -23.74   26.46
  10  -1  -1  395.41   32.47
  11  -1  -1   25.57   28.98
  12  -1  -1  -41.85   32.92
  13  -1  -1  144.04   15.48
  14  -1  -1  -21.17   34.01
  15  -1  -1   -6.70   52.42
  16  -1  -1   35.81   52.46
 -17  -1  -2  -55.58   57.23
 -16  -1  -2   68.86   47.48
 -15  -1  -2   26.32   20.03
 -14  -1  -2  -20.41   36.43
 -13  -1  -2   18.60   31.76
 -12  -1  -2   -7.07   29.87
 -11  -1  -2   37.26   26.81
 -10  -1  -2   34.11   24.84
  -9  -1  -2  150.02   13.48
  -8  -1  -2   16.22   19.94
  -7  -1  -2    3.29   18.31
  -6  -1  -2  -11.43   18.26
  -5  -1  -2  138.04   12.56
  -4  -1  -2   78.53    7.18
  -3  -1  -2  129.97   11.15
  -2  -1  -2  409.09    9.81
  -1  -1  -2  434.90    8.87
   0  -1  -2 1010.37   11.92
   1  -1  -2 1811.66   17.13
   2  -1  -2   65.57    5.81
   3  -1  -2  623.74   19.03
   4  -1  -2  276.77   18.90
   5  -1  -2   -2.12   17.86
   6  -1  -2   14.78   19.05
   7  -1  -2   17.15   14.88
   8  -1  -2  212.19   18.57
   9  -1  -2  151.36   14.45
  10  -1  -2  -23.16   29.72
  11  -1  -2  138.53   14.71
  12  -1  -2   24.56   18.58
  13  -1  -2   30.07   32.08
  14  -1  -2   54.93   15.43
  15  -1  -2   10.01   51.23
 -17  -1  -3   15.28   53.46
 -16  -1  -3  -70.18   50.08
 -15  -1  -3  -26.89   34.37
 -14  -1  -3   -4.81   32.47
 -13  -1  -3   19.99   15.35
 -12  -1  -3  -11.05   28.84
 -11  -1  -3    6.25   20.30
 -10  -1  -3   28.37   24.46
  -9  -1  -3   73.30   10.38
  -8  -1  -3  169.89   16.00
  -7  -1  -3  319.19   21.91
  -6  -1  -3   -9.21   17.88
  -5  -1  -3  321.97   19.25
  -4  -1  -3  620.40   18.44
  -3  -1  -3 1244.43   18.06
  -2  -1  -3   32.65    4.20
  -1  -1  -3  382.15   10.76
   0  -1  -3   -0.97    9.08
   1  -1  -3  321.09   13.44
   2  -1  -3  444.12   16.82
   3  -1  -3  107.67   10.11
   4  -1  -3   11.03   17.22
   5  -1  -3  112.75   11.11
   6  -1  -3   15.81   20.09
   7  -1  -3  299.04   25.82
   8  -1  -3  -14.32   26.53
   9  -1  -3  -15.69   28.06
  10  -1  -3  161.70   16.11
  11  -1  -3   45.58   14.22
  12  -1  -3  -39.39   33.65
  13  -1  -3   15.80   33.03
  14  -1  -3   21.01   49.56
  15  -1  -3  -44.14   59.12
 -17  -1  -4  -14.89   52.06
 -16  -1  -4   39.98   33.94
 -15  -1  -4   -2.71   32.27
 -14  -1  -4    3.62   31.80
 -13  -1  -4    2.50   30.47
 -12  -1  -4    4.85   28.70
 -11  -1  -4    2.08   28.76
 -10  -1  -4   17.80   26.73
  -9  -1  -4    4.23   22.49
  -8  -1  -4    8.77   20.69
  -7  -1  -4  303.33   21.53
  -6  -1  -4  832.99   23.53
  -5  -1  -4   81.10    8.00
  -4  -1  -4  237.27   17.85
  -3  -1  -4  981.87   19.19
  -2  -1  -4 2514.60   23.25
  -1  -1  -4 6498.80   34.15
   0  -1  -4 3644.34   27.95
   1  -1  -4   97.42    8.43
   2  -1  -4  360.55   18.22
   3  -1  -4  691.58   21.56
   4  -1  -4  205.17   19.05
   5  -1  -4  103.15    9.87
   6  -1  -4   14.45   12.25
   7  -1  -4  109.41   11.35
   8  -1  -4   98.44   12.35
   9  -1  -4  191.49   18.43
  10  -1  -4  146.22   14.52
  11  -1  -4  -15.58   32.17
  12  -1  -4   31.98   33.21
  13  -1  -4    7.16   35.82
  14  -1  -4   57.39   22.02
  15  -1  -4 -104.87   58.70
 -17  -1  -5   14.07   51.51
 -16  -1  -5   11.44   35.32
 -15  -1  -5    1.61   34.38
 -14  -1  -5   32.37   30.59
 -13  -1  -5   32.55   31.22
 -12  -1  -5   37.18   29.93
 -11  -1  -5   37.14   28.67
 -10  -1  -5   81.09   11.33
  -9  -1  -5   28.33   22.04
  -8  -1  -5  392.11   24.64
  -7  -1  -5  150.22   14.10
  -6  -1  -5  202.22   19.42
  -5  -1  -5  212.25   18.60
  -4  -1  -5  -16.98   17.28
  -3  -1  -5  230.52   17.82
  -2  -1  -5 9041.59   45.24
  -1  -1  -5  933.49   20.15
   0  -1  -5  101.61    9.30
   1  -1  -5   20.01    7.02
   2  -1  -5   10.01   16.92
   3  -1  -5  -35.36   17.06
   4  -1  -5   24.01    8.26
   5  -1  -5  136.13   12.94
   6  -1  -5   -6.23   23.49
   7  -1  -5  107.15   12.23
   8  -1  -5   85.16   13.27
   9  -1  -5   33.07   13.75
  10  -1  -5   -1.04   33.47
  11  -1  -5   34.01   31.58
  12  -1  -5   28.13   33.27
  13  -1  -5  -62.63   38.78
  14  -1  -5  -45.51   51.34
 -17  -1  -6  -29.93   51.97
 -16  -1  -6  -17.00   34.74
 -15  -1  -6   38.85   33.13
 -14  -1  -6   20.72   30.67
 -13  -1  -6   52.12   13.62
 -12  -1  -6  121.39   13.44
 -11  -1  -6    9.49   26.83
 -10  -1  -6   39.36   11.35
  -9  -1  -6  262.48   24.41
  -8  -1  -6   57.92    9.71
  -7  -1  -6   -8.32   19.51
  -6  -1  -6 1279.74   28.06
  -5  -1  -6  -33.08   18.96
  -4  -1  -6  133.57   12.97
  -3  -1  -6 4161.75   36.90
  -2  -1  -6 2918.59   31.68
  -1  -1  -6  151.28   12.77
   0  -1  -6  413.34   20.29
   1  -1  -6  116.13   10.28
   2  -1  -6    4.77   16.86
   3  -1  -6   -8.11   18.20
   4  -1  -6  492.19   23.20
   5  -1  -6  393.58   27.08
   6  -1  -6  547.35   30.78
   7  -1  -6    5.66   29.51
   8  -1  -6  303.04   23.42
   9  -1  -6   39.49   33.09
  10  -1  -6    5.01   30.86
  11  -1  -6   86.92   15.50
  12  -1  -6   -5.63   33.19
  13  -1  -6   49.30   21.10
  14  -1  -6  -18.16   55.96
 -18  -1  -7   40.48   27.09
 -17  -1  -7   21.22   50.00
 -16  -1  -7   12.51   33.16
 -15  -1  -7   40.50   32.35
 -14  -1  -7   27.48   22.15
 -13  -1  -7    3.12   15.30
 -12  -1  -7   42.11   29.84
 -11  -1  -7  146.79   14.60
 -10  -1  -7   17.45   14.57
  -9  -1  -7   62.88   10.48
  -8  -1  -7  669.69   28.07
  -7  -1  -7   26.55   20.63
  -6  -1  -7  136.31   11.34
  -5  -1  -7  659.34   23.77
  -4  -1  -7  580.79   22.20
  -3  -1  -7   53.94    8.19
  -2  -1  -7    2.99   17.73
  -1  -1  -7   -0.72   17.45
   0  -1  -7   25.69   18.18
   1  -1  -7  144.81   12.93
   2  -1  -7  113.81   10.71
   3  -1  -7  -22.07   18.70
   4  -1  -7   13.61   22.78
   5  -1  -7   39.33   10.74
   6  -1  -7   52.01   11.90
   7  -1  -7   -0.83   28.50
   8  -1  -7  -27.90   29.84
   9  -1  -7  -12.59   32.05
  10  -1  -7  -10.29   32.44
  11  -1  -7    3.06   32.99
  12  -1  -7   69.27   49.23
  13  -1  -7   -6.84   52.74
 -18  -1  -8   24.64   49.95
 -17  -1  -8   -3.98   50.66
 -16  -1  -8   20.69   32.81
 -15  -1  -8  -20.69   32.78
 -14  -1  -8   34.88   30.06
 -13  -1  -8    0.06   31.66
 -12  -1  -8   -0.76   30.85
 -11  -1  -8   26.75   26.81
 -10  -1  -8   77.06   12.11
  -9  -1  -8    8.10   24.56
  -8  -1  -8  -69.47   23.52
  -7  -1  -8  219.72   16.14
  -6  -1  -8   -4.97   20.53
  -5  -1  -8  321.83   21.80
  -4  -1  -8  544.26   22.83
  -3  -1  -8  -27.85   18.51
  -2  -1  -8  436.18   22.02
  -1  -1  -8   24.89   17.49
   0  -1  -8   24.66   18.50
   1  -1  -8   -3.97   18.65
   2  -1  -8    8.48   18.59
   3  -1  -8   54.97    8.97
   4  -1  -8  125.71   11.54
   5  -1  -8  226.63   19.58
   6  -1  -8  235.43   20.60
   7  -1  -8   10.53   29.47
   8  -1  -8   57.90   13.68
   9  -1  -8   55.72   14.68
  10  -1  -8  -10.59   34.37
  11  -1  -8  -62.77   35.86
  12  -1  -8    0.38   52.58
  13  -1  -8  -20.52   58.11
 -18  -1  -9   43.84   51.08
 -17  -1  -9   -4.00   52.55
 -16  -1  -9  -49.35   36.26
 -15  -1  -9  -28.85   33.73
 -14  -1  -9   23.50   31.87
 -13  -1  -9  -23.11   30.20
 -12  -1  -9   28.53   28.45
 -11  -1  -9   11.18   15.79
 -10  -1  -9  128.87   12.56
  -9  -1  -9  102.52   11.75
  -8  -1  -9  238.94   18.54
  -7  -1  -9 1272.42   33.53
  -6  -1  -9   20.63   20.73
  -5  -1  -9    6.22   19.99
  -4  -1  -9 2536.56   36.89
  -3  -1  -9  923.40   26.81
  -2  -1  -9   -1.07   13.49
  -1  -1  -9   26.55    8.55
   0  -1  -9   14.07   19.21
   1  -1  -9  431.29   24.66
   2  -1  -9   18.20   20.81
   3  -1  -9    2.96   21.48
   4  -1  -9   53.79   10.77
   5  -1  -9   -2.30   25.50
   6  -1  -9  -12.86   28.68
   7  -1  -9   93.68   13.65
   8  -1  -9    5.19   31.29
   9  -1  -9  -35.71   32.24
  10  -1  -9  -11.06   34.77
  11  -1  -9 -127.65   55.33
  12  -1  -9  -43.48   54.79
 -17  -1 -10   40.52   49.92
 -16  -1 -10    2.51   33.67
 -15  -1 -10   20.15   31.19
 -14  -1 -10   35.73   32.38
 -13  -1 -10   32.25   28.89
 -12  -1 -10   83.38   13.45
 -11  -1 -10   13.15   29.10
 -10  -1 -10   62.23   12.50
  -9  -1 -10  297.10   29.40
  -8  -1 -10   70.29   11.40
  -7  -1 -10   25.70   22.45
  -6  -1 -10  255.72   24.01
  -5  -1 -10  253.26   23.87
  -4  -1 -10  483.11   26.31
  -3  -1 -10   15.50   19.76
  -2  -1 -10   12.79   13.99
  -1  -1 -10   56.89    9.48
   0  -1 -10   22.96   21.34
   1  -1 -10   61.78   10.09
   2  -1 -10   13.60   23.78
   3  -1 -10   17.71   17.45
   4  -1 -10    6.19   26.63
   5  -1 -10   -6.52   27.22
   6  -1 -10   67.47   13.04
   7  -1 -10   -7.96   29.54
   8  -1 -10   22.31   33.58
   9  -1 -10   42.87   32.00
  10  -1 -10   44.28   32.13
  11  -1 -10   31.15   51.83
 -17  -1 -11   45.65   34.90
 -16  -1 -11   47.94   47.86
 -15  -1 -11  -36.83   34.32
 -14  -1 -11   32.18   33.72
 -13  -1 -11    2.77   30.96
 -12  -1 -11  -23.13   30.70
 -11  -1 -11    8.03   30.43
 -10  -1 -11  -58.24   29.44
  -9  -1 -11  -10.93   27.01
  -8  -1 -11  302.16   27.31
  -7  -1 -11   22.05   10.93
  -6  -1 -11   95.90   11.22
  -5  -1 -11  887.02   31.05
  -4  -1 -11  869.83   30.89
  -3  -1 -11  105.29   10.61
  -2  -1 -11   -3.94   23.13
  -1  -1 -11   25.32   22.34
   0  -1 -11  130.82   12.53
   1  -1 -11   15.96   24.71
   2  -1 -11  -27.95   26.75
   3  -1 -11   10.05   26.21
   4  -1 -11  232.94   20.97
   5  -1 -11   17.25   27.30
   6  -1 -11  155.09   15.23
   7  -1 -11   33.06   30.32
   8  -1 -11   12.15   32.05
   9  -1 -11   55.16   15.46
  10  -1 -11  -30.53   52.39
  11  -1 -11  -58.29   54.93
 -17  -1 -12   39.00   28.69
 -16  -1 -12  -13.09   34.64
 -15  -1 -12  -54.76   34.36
 -14  -1 -12   40.37   31.43
 -13  -1 -12   96.07   14.30
 -12  -1 -12   22.58   30.26
 -11  -1 -12   56.47   13.76
 -10  -1 -12   81.03   13.53
  -9  -1 -12   83.60   12.75
  -8  -1 -12  118.93   12.72
  -7  -1 -12  150.56   13.44
  -6  -1 -12  207.78   19.44
  -5  -1 -12   57.06   11.74
  -4  -1 -12  -15.41   26.53
  -3  -1 -12  458.32   28.26
  -2  -1 -12  329.90   28.65
  -1  -1 -12  143.31   13.31
   0  -1 -12  -10.95   27.12
   1  -1 -12   25.81   28.15
   2  -1 -12  -11.87   26.80
   3  -1 -12    7.52   27.09
   4  -1 -12   29.06   27.21
   5  -1 -12   88.57   13.27
   6  -1 -12  -14.07   29.90
   7  -1 -12   53.16   15.17
   8  -1 -12   19.68   16.49
   9  -1 -12   36.27   50.59
  10  -1 -12    4.65   52.80
 -17  -1 -13   59.64   48.16
 -16  -1 -13    2.16   47.18
 -15  -1 -13  -15.48   35.03
 -14  -1 -13  -28.42   33.62
 -13  -1 -13   30.51   13.63
 -12  -1 -13   24.99   31.63
 -11  -1 -13   24.25   30.23
 -10  -1 -13   27.55   20.21
  -9  -1 -13   92.23   13.42
  -8  -1 -13  -12.69   28.92
  -7  -1 -13   -8.81   26.47
  -6  -1 -13  142.66   12.94
  -5  -1 -13   66.91   12.57
  -4  -1 -13   90.24   11.82
  -3  -1 -13   -5.05   28.28
  -2  -1 -13  -23.59   29.24
  -1  -1 -13  -15.51   28.69
   0  -1 -13   89.10   13.00
   1  -1 -13   29.34   27.06
   2  -1 -13  -21.42   30.05
   3  -1 -13  199.55   18.09
   4  -1 -13  180.19   15.44
   5  -1 -13   83.99   14.14
   6  -1 -13   25.62   29.15
   7  -1 -13   26.23   32.44
   8  -1 -13   57.18   45.48
   9  -1 -13  -14.24   53.62
 -17  -1 -14  -55.74   58.15
 -16  -1 -14   53.76   53.00
 -15  -1 -14   41.54   28.03
 -14  -1 -14   26.80   33.11
 -13  -1 -14  -22.74   32.26
 -12  -1 -14   32.23   22.01
 -11  -1 -14   25.03   29.27
 -10  -1 -14   -8.42   30.14
  -9  -1 -14  201.00   18.22
  -8  -1 -14   -7.04   30.40
  -7  -1 -14   19.94   28.49
  -6  -1 -14  251.90   22.15
  -5  -1 -14  230.27   21.66
  -4  -1 -14    9.35   27.99
  -3  -1 -14   75.81   13.42
  -2  -1 -14  691.96   36.98
  -1  -1 -14  324.25   32.30
   0  -1 -14  170.08   16.68
   1  -1 -14   14.97   29.64
   2  -1 -14   35.72   13.91
   3  -1 -14    6.07   30.11
   4  -1 -14   39.72   29.35
   5  -1 -14   81.82   13.62
   6  -1 -14   36.51   28.63
   7  -1 -14   17.62   26.40
   8  -1 -14  -23.49   51.19
 -16  -1 -15   50.22   35.11
 -15  -1 -15  -52.94   49.61
 -14  -1 -15   27.69   19.42
 -13  -1 -15   14.82   32.88
 -12  -1 -15   -3.67   31.59
 -11  -1 -15  -48.89   34.02
 -10  -1 -15  -50.96   32.61
  -9  -1 -15   18.78   30.81
  -8  -1 -15   38.69   30.12
  -7  -1 -15   40.54   30.94
  -6  -1 -15  213.52   18.29
  -5  -1 -15  174.14   15.66
  -4  -1 -15   82.54   13.59
  -3  -1 -15   49.83   14.14
  -2  -1 -15   25.21   32.35
  -1  -1 -15   15.58   30.51
   0  -1 -15   30.37   29.91
   1  -1 -15   -9.34   30.12
   2  -1 -15  -76.09   34.58
   3  -1 -15  -22.52   33.16
   4  -1 -15   44.55   31.98
   5  -1 -15  -32.76   34.12
   6  -1 -15  -47.73   50.27
   7  -1 -15  -17.75   51.38
 -16  -1 -16  -36.95   37.22
 -15  -1 -16  -67.90   54.56
 -14  -1 -16  -12.89   48.31
 -13  -1 -16  -67.50   35.11
 -12  -1 -16  -23.25   33.18
 -11  -1 -16   -7.18   32.52
 -10  -1 -16   21.29   17.95
  -9  -1 -16   -8.74   31.48
  -8  -1 -16   26.94   18.15
  -7  -1 -16  254.96   23.39
  -6  -1 -16   18.84   22.63
  -5  -1 -16   36.33   31.34
  -4  -1 -16   15.47   30.79
  -3  -1 -16  -34.02   32.03
  -2  -1 -16   23.40   21.57
  -1  -1 -16   56.53   14.17
   0  -1 -16    0.93   29.56
   1  -1 -16   19.31   31.13
   2  -1 -16  109.37   15.19
   3  -1 -16   20.32   35.42
   4  -1 -16   47.21   14.59
   5  -1 -16  -75.75   51.90
   6  -1 -16   38.13   34.07
 -15  -1 -17    8.73   54.23
 -14  -1 -17   49.20   49.20
 -13  -1 -17  -91.53   53.29
 -12  -1 -17    9.77   34.37
 -11  -1 -17  -29.63   33.58
 -10  -1 -17   35.76   32.53
  -9  -1 -17  -12.27   31.42
  -8  -1 -17  -35.57   33.34
  -7  -1 -17   -5.70   31.80
  -6  -1 -17  -46.22   33.89
  -5  -1 -17   52.66   13.96
  -4  -1 -17  -15.37   30.22
  -3  -1 -17    5.85   31.08
  -2  -1 -17   15.84   32.08
  -1  -1 -17   27.07   32.11
   0  -1 -17   -9.50   32.73
   1  -1 -17   33.99   33.99
   2  -1 -17  -34.63   35.15
   3  -1 -17   30.00   45.16
   4  -1 -17    2.00   49.36
   5  -1 -17   31.05   50.29
 -14  -1 -18  -27.43   52.35
 -13  -1 -18   40.63   52.77
 -12  -1 -18   30.71   49.44
 -11  -1 -18   -0.18   33.58
 -10  -1 -18   -8.62   33.52
  -9  -1 -18   28.49   23.10
  -8  -1 -18   62.61   14.38
  -7  -1 -18   -0.77   31.77
  -6  -1 -18   30.61   22.58
  -5  -1 -18    2.83   33.33
  -4  -1 -18   25.10   32.22
  -3  -1 -18    3.94   33.71
  -2  -1 -18   18.09   23.70
  -1  -1 -18   -4.05   32.95
   0  -1 -18   41.86   35.36
   1  -1 -18   -4.75   36.73
   2  -1 -18   42.00   21.74
   3  -1 -18   38.89   51.20
   4  -1 -18   51.54   45.28
 -14  -1 -19   11.31   57.43
 -13  -1 -19   21.46   49.11
 -12  -1 -19   22.67   49.14
 -11  -1 -19   61.47   48.20
 -10  -1 -19   21.89   33.87
  -9  -1 -19   39.78   35.08
  -8  -1 -19   18.91   33.77
  -7  -1 -19  100.45   15.88
  -6  -1 -19   49.72   15.41
  -5  -1 -19  -36.63   36.25
  -4  -1 -19   16.86   33.83
  -3  -1 -19   -6.96   34.03
  -2  -1 -19  -48.95   36.04
  -1  -1 -19  -46.54   49.35
   0  -1 -19   36.91   21.99
   1  -1 -19  -31.03   53.25
   2  -1 -19  -58.54   53.23
 -12  -1 -20   10.97   52.88
 -11  -1 -20   51.86   22.52
 -10  -1 -20    1.33   49.72
  -9  -1 -20   24.68   34.69
  -8  -1 -20   19.75   51.00
  -7  -1 -20   55.11   46.93
  -6  -1 -20   12.94   48.06
  -5  -1 -20    9.29   51.27
  -4  -1 -20   18.44   50.39
  -3  -1 -20   36.75   51.39
  -2  -1 -20  -49.74   56.22
  -1  -1 -20    2.72   51.47
   0  -1 -20    4.63   52.58
 -11  -1 -21   71.86   53.59
 -10  -1 -21  -14.44   54.39
  -9  -1 -21  -15.93   53.85
  -8  -1 -21    3.42   51.24
  -7  -1 -21  -11.55   52.91
  -6  -1 -21   33.94   51.42
  -5  -1 -21  -14.99   50.65
  -4  -1 -21  -57.10   52.67
  -3  -1 -21   23.47   52.81
  -2  -1 -21   38.29   50.99
   2  -2  21  -42.09   57.82
   3  -2  21  -16.50   52.57
   4  -2  21  -82.78   57.08
   5  -2  21    5.70   54.89
   6  -2  21  -68.32   54.54
   7  -2  21   34.20   48.44
   8  -2  21   60.80   50.66
   9  -2  21   50.28   51.80
   0  -2  20   24.27   54.35
   1  -2  20  -47.87   53.67
   2  -2  20   66.24   52.46
   3  -2  20    6.94   51.96
   4  -2  20  -50.84   52.47
   5  -2  20   50.74   21.91
   6  -2  20  -55.75   51.56
   7  -2  20  -26.06   56.46
   8  -2  20   27.00   29.17
   9  -2  20  -90.40   56.05
  10  -2  20  -49.83   53.21
  11  -2  20  -69.33   54.98
  -2  -2  19  -57.07   53.77
  -1  -2  19   37.81   51.23
   0  -2  19   38.79   22.48
   1  -2  19  -37.00   52.07
   2  -2  19   -2.30   36.15
   3  -2  19   31.13   23.87
   4  -2  19  -23.71   33.54
   5  -2  19   51.23   34.56
   6  -2  19   16.34   34.51
   7  -2  19   11.91   34.73
   8  -2  19  -37.96   36.29
   9  -2  19   70.09   48.87
  10  -2  19  -50.83   47.76
  11  -2  19  -50.01   50.01
  12  -2  19   40.73   48.75
  13  -2  19 -185.82   61.42
  -4  -2  18   58.88   50.03
  -3  -2  18  -25.14   57.02
  -2  -2  18   24.62   51.36
  -1  -2  18   21.20   35.02
   0  -2  18    3.84   33.83
   1  -2  18   43.62   35.32
   2  -2  18  102.25   15.43
   3  -2  18  -76.98   36.07
   4  -2  18  -17.82   34.29
   5  -2  18   17.76   32.41
   6  -2  18    6.53   22.85
   7  -2  18   13.58   22.04
   8  -2  18  -16.57   34.35
   9  -2  18   33.51   14.99
  10  -2  18   33.35   31.93
  11  -2  18  -37.68   50.07
  12  -2  18   16.09   51.00
  13  -2  18  -72.68   55.03
  14  -2  18   15.58   52.22
  -5  -2  17    5.26   53.57
  -4  -2  17  -32.49   53.92
  -3  -2  17  133.04   22.77
  -2  -2  17  -43.09   36.30
  -1  -2  17    5.83   33.84
   0  -2  17   35.95   34.06
   1  -2  17   39.08   34.98
   2  -2  17   22.44   14.66
   3  -2  17   18.43   21.40
   4  -2  17   94.88   15.20
   5  -2  17   30.04   30.40
   6  -2  17  -13.41   31.54
   7  -2  17  -20.91   32.99
   8  -2  17   -1.15   31.95
   9  -2  17   12.37   31.26
  10  -2  17  -11.30   33.19
  11  -2  17  -36.42   33.53
  12  -2  17   16.70   32.85
  13  -2  17   63.82   47.92
  14  -2  17   26.20   52.07
  -6  -2  16   -3.96   53.72
  -5  -2  16   72.32   22.09
  -4  -2  16   25.35   25.06
  -3  -2  16  -50.16   34.85
  -2  -2  16   30.30   33.17
  -1  -2  16   39.18   33.28
   0  -2  16   38.65   31.60
   1  -2  16  -34.99   32.63
   2  -2  16   13.81   31.63
   3  -2  16   64.83   13.88
   4  -2  16   45.56   31.82
   5  -2  16   23.41   23.35
   6  -2  16   76.36   14.40
   7  -2  16   61.65   14.59
   8  -2  16    4.39   30.49
   9  -2  16  -17.45   32.10
  10  -2  16   10.59   31.01
  11  -2  16    6.82   33.40
  12  -2  16  -13.24   34.16
  -5  -2  15  -21.53   33.93
  -4  -2  15  115.43   15.21
  -3  -2  15   24.95   32.07
  -2  -2  15  295.63   23.60
  -1  -2  15  -83.49   33.85
   0  -2  15   21.79   31.51
   1  -2  15   96.77   14.39
   2  -2  15    3.95   29.78
   3  -2  15  177.90   16.36
   4  -2  15  326.44   24.52
   5  -2  15  500.75   34.66
   6  -2  15   56.73   14.18
   7  -2  15   25.81   29.81
   8  -2  15   42.15   29.11
   9  -2  15   12.08   30.01
  10  -2  15  -28.25   32.27
  11  -2  15  -15.01   33.83
  12  -2  15   31.56   36.01
  13  -2  15  -16.87   33.59
  -6  -2  14  -52.73   36.19
  -5  -2  14   28.16   34.16
  -4  -2  14   53.21   14.80
  -3  -2  14   23.77   15.91
  -2  -2  14  154.07   14.92
  -1  -2  14  276.36   25.01
   0  -2  14  144.06   15.00
   1  -2  14   40.72   31.99
   2  -2  14   -9.66   30.00
   3  -2  14   -7.68   30.47
   4  -2  14  160.76   15.46
   5  -2  14   24.27   28.79
   6  -2  14   92.29   13.44
   7  -2  14    3.91   29.79
   8  -2  14    4.50   29.57
   9  -2  14   39.69   29.51
  10  -2  14   23.96   29.21
  11  -2  14   25.42   31.69
  12  -2  14   -4.32   33.10
  13  -2  14   23.53   32.73
  14  -2  14    4.08   33.75
  -7  -2  13   -6.32   31.07
  -6  -2  13   -8.07   31.57
  -5  -2  13  -46.12   32.87
  -4  -2  13   82.05   14.53
  -3  -2  13  -20.65   31.33
  -2  -2  13   27.74   31.99
  -1  -2  13  -50.20   31.43
   0  -2  13  192.61   16.07
   1  -2  13   78.89   13.21
   2  -2  13   92.07   12.71
   3  -2  13    5.07   28.00
   4  -2  13  346.54   22.68
   5  -2  13  185.85   17.06
   6  -2  13  116.32   13.28
   7  -2  13   42.65   13.15
   8  -2  13  -27.63   28.97
   9  -2  13  118.71   13.77
  10  -2  13  -43.11   31.07
  11  -2  13   -0.01   31.08
  12  -2  13   32.07   21.42
  13  -2  13   19.87   33.79
  14  -2  13   45.37   31.98
  -8  -2  12   44.36   15.26
  -7  -2  12   37.27   31.93
  -6  -2  12   75.75   14.76
  -5  -2  12   40.42   14.15
  -4  -2  12   35.85   29.84
  -3  -2  12   50.07   13.29
  -2  -2  12  138.00   13.68
  -1  -2  12  568.73   33.61
   0  -2  12  157.33   13.06
   1  -2  12  -18.88   27.28
   2  -2  12  253.91   20.46
   3  -2  12   19.17   26.81
   4  -2  12   39.83   11.46
   5  -2  12  370.80   28.77
   6  -2  12   18.34   18.92
   7  -2  12  126.68   12.91
   8  -2  12  -30.75   29.72
   9  -2  12   20.02   16.23
  10  -2  12   17.33   29.76
  11  -2  12   38.30   31.15
  12  -2  12  -33.73   30.38
  13  -2  12  -83.82   35.23
  14  -2  12    7.61   33.67
  15  -2  12  -15.96   35.36
  -9  -2  11   19.55   15.31
  -8  -2  11  -26.96   32.90
  -7  -2  11  194.25   18.70
  -6  -2  11   41.16   28.67
  -5  -2  11   32.94   12.97
  -4  -2  11   -4.22   29.78
  -3  -2  11   36.58   29.58
  -2  -2  11   12.31   27.52
  -1  -2  11   12.18   25.68
   0  -2  11   18.78   25.01
   1  -2  11  -21.31   24.30
   2  -2  11   -0.29   25.47
   3  -2  11  -32.86   24.12
   4  -2  11   53.03   10.94
   5  -2  11  193.46   17.92
   6  -2  11    6.25   17.59
   7  -2  11   38.22   26.04
   8  -2  11   59.79   12.34
   9  -2  11   27.44   19.24
  10  -2  11    4.09   29.24
  11  -2  11   20.76   29.06
  12  -2  11   11.69   31.77
  13  -2  11   -3.13   31.32
  14  -2  11  -50.77   34.46
  15  -2  11   55.03   15.68
 -10  -2  10   16.82   34.78
  -9  -2  10  -12.77   35.53
  -8  -2  10  133.16   14.72
  -7  -2  10   21.40   30.70
  -6  -2  10   31.70   28.57
  -5  -2  10   56.02   12.31
  -4  -2  10  447.86   32.11
  -3  -2  10  126.79   12.45
  -2  -2  10   17.11   24.51
  -1  -2  10  139.66   12.43
   0  -2  10  413.29   26.69
   1  -2  10    3.32   22.75
   2  -2  10   36.36    9.61
   3  -2  10  527.65   26.83
   4  -2  10  513.68   26.82
   5  -2  10  297.47   25.55
   6  -2  10   65.28   10.83
   7  -2  10  131.00   12.80
   8  -2  10   24.11   18.60
   9  -2  10   12.50   27.34
  10  -2  10  358.79   33.55
  11  -2  10   91.40   13.81
  12  -2  10    6.78   28.71
  13  -2  10    0.56   32.00
  14  -2  10   -2.87   33.33
  15  -2  10  -10.06   32.81
 -11  -2   9   52.36   35.13
 -10  -2   9   31.62   32.25
  -9  -2   9   29.11   32.15
  -8  -2   9  -60.31   32.21
  -7  -2   9  126.18   14.23
  -6  -2   9  164.45   14.97
  -5  -2   9   18.55   11.06
  -4  -2   9    9.21   24.26
  -3  -2   9  171.38   14.74
  -2  -2   9  274.92   26.79
  -1  -2   9    9.02   21.45
   0  -2   9   68.00    9.40
   1  -2   9  162.76   14.90
   2  -2   9  159.69   15.25
   3  -2   9   75.45    9.38
   4  -2   9  153.71   13.12
   5  -2   9  190.70   16.42
   6  -2   9  113.21   10.29
   7  -2   9    4.10   23.36
   8  -2   9    0.83   27.08
   9  -2   9   67.57   12.18
  10  -2   9  -29.51   28.18
  11  -2   9  -51.07   29.94
  12  -2   9  -44.12   31.39
  13  -2   9   65.30   14.04
  14  -2   9   28.45   14.97
  15  -2   9  -43.40   34.68
 -11  -2   8  -20.81   37.07
 -10  -2   8  -14.76   33.94
  -9  -2   8  103.89   14.80
  -8  -2   8   45.97   14.45
  -7  -2   8   -9.71   30.50
  -6  -2   8  -35.64   27.35
  -5  -2   8   11.19   25.13
  -4  -2   8   26.96   21.59
  -3  -2   8  319.28   24.30
  -2  -2   8  -24.03   20.93
  -1  -2   8   50.88    8.87
   0  -2   8   55.52    8.78
   1  -2   8   -9.43   18.84
   2  -2   8   15.39   18.40
   3  -2   8   60.04    8.48
   4  -2   8  144.41   13.75
   5  -2   8  947.29   26.79
   6  -2   8  323.32   23.33
   7  -2   8  315.79   24.79
   8  -2   8  413.19   26.85
   9  -2   8   13.82   26.23
  10  -2   8    1.85   28.25
  11  -2   8  179.81   17.89
  12  -2   8   30.70   28.98
  13  -2   8   28.72   20.61
  14  -2   8   33.45   33.96
  15  -2   8  -34.69   35.79
 -12  -2   7  -37.44   36.37
 -11  -2   7  -11.38   33.93
 -10  -2   7  -13.06   34.26
  -9  -2   7  178.11   16.61
  -8  -2   7  158.98   15.87
  -7  -2   7  197.02   17.26
  -6  -2   7   33.07   24.41
  -5  -2   7  410.48   26.16
  -4  -2   7  266.39   23.21
  -3  -2   7  415.86   23.62
  -2  -2   7  461.79   24.44
  -1  -2   7  368.32   22.04
   0  -2   7    1.88   17.17
   1  -2   7  -43.45   18.77
   2  -2   7  -17.02   17.57
   3  -2   7   28.97    8.28
   4  -2   7   29.00    8.38
   5  -2   7  927.46   26.16
   6  -2   7  335.10   22.80
   7  -2   7   33.76    9.24
   8  -2   7   42.17   10.21
   9  -2   7  355.77   28.09
  10  -2   7   47.60   12.42
  11  -2   7   29.02   28.08
  12  -2   7   15.23   29.31
  13  -2   7   36.84   30.43
  14  -2   7   30.52   22.31
  15  -2   7   19.41   35.36
 -12  -2   6   23.72   35.60
 -11  -2   6   27.64   22.68
 -10  -2   6   -7.59   31.86
  -9  -2   6  270.24   22.70
  -8  -2   6   36.82   29.82
  -7  -2   6  322.90   30.59
  -6  -2   6    0.30   23.43
  -5  -2   6   24.70    9.86
  -4  -2   6  265.45   21.58
  -3  -2   6  966.60   26.17
  -2  -2   6  955.43   24.78
  -1  -2   6  300.45   20.45
   0  -2   6  477.78   20.90
   1  -2   6  355.56   20.39
   2  -2   6 1293.53   26.01
   3  -2   6 1191.67   25.71
   4  -2   6  249.32   19.91
   5  -2   6   94.82    9.35
   6  -2   6  230.63   21.23
   7  -2   6    0.80   20.76
   8  -2   6  146.80   13.62
   9  -2   6  303.22   27.75
  10  -2   6  140.08   13.90
  11  -2   6  -15.74   29.23
  12  -2   6   68.16   13.75
  13  -2   6  125.53   14.76
  14  -2   6   18.43   32.34
  15  -2   6   29.63   15.58
 -13  -2   5    2.88   36.58
 -12  -2   5   25.05   33.11
 -11  -2   5  -53.75   33.24
 -10  -2   5  120.65   14.47
  -9  -2   5   22.97   30.39
  -8  -2   5  -13.20   28.41
  -7  -2   5   32.31   26.12
  -6  -2   5  510.49   28.69
  -5  -2   5  890.67   27.61
  -4  -2   5   26.22   18.38
  -3  -2   5  219.87   19.10
  -2  -2   5   22.66   17.21
  -1  -2   5  522.46   20.08
   0  -2   5  186.16   12.60
   1  -2   5   21.63   16.71
   2  -2   5  770.63   21.64
   3  -2   5  201.52   18.89
   4  -2   5   35.41    8.01
   5  -2   5  198.14   13.56
   6  -2   5  165.03   13.96
   7  -2   5    8.63   20.07
   8  -2   5  492.49   27.43
   9  -2   5   61.41   11.34
  10  -2   5  362.10   29.23
  11  -2   5   15.55   29.83
  12  -2   5   19.02   21.67
  13  -2   5   -2.51   31.80
  14  -2   5   18.94   18.04
  15  -2   5  -70.21   35.50
 -13  -2   4   42.84   15.36
 -12  -2   4    5.06   32.80
 -11  -2   4   38.58   31.19
 -10  -2   4   19.92   21.34
  -9  -2   4  378.08   32.25
  -8  -2   4  304.91   28.58
  -7  -2   4  -26.32   23.86
  -6  -2   4   -3.42   21.88
  -5  -2   4   35.39    8.66
  -4  -2   4  168.03   13.43
  -3  -2   4  267.45   18.88
  -2  -2   4  641.81   20.54
  -1  -2   4 4528.19   34.19
   0  -2   4  113.83   10.62
   1  -2   4 1050.32   19.53
   2  -2   4  232.19   16.45
   3  -2   4  413.64   18.88
   4  -2   4   10.42   17.49
   5  -2   4  -14.53   18.15
   6  -2   4  146.66   11.26
   7  -2   4  248.28   21.29
   8  -2   4    0.05   21.72
   9  -2   4   -1.55   24.35
  10  -2   4    9.26   26.17
  11  -2   4    8.31   28.63
  12  -2   4  108.64   13.50
  13  -2   4  -75.46   33.51
  14  -2   4   24.62   33.32
  15  -2   4    6.52   34.10
 -14  -2   3   -6.54   36.91
 -13  -2   3  -24.51   34.99
 -12  -2   3  -17.93   31.66
 -11  -2   3  125.35   14.49
 -10  -2   3  124.13   13.81
  -9  -2   3   31.69   28.33
  -8  -2   3   35.18   11.19
  -7  -2   3   19.65   15.73
  -6  -2   3   20.87   18.97
  -5  -2   3  369.56   21.94
  -4  -2   3   47.51    7.89
  -3  -2   3 3941.41   35.37
  -2  -2   3   35.26    6.54
  -1  -2   3   57.86    5.59
   0  -2   3  442.59   13.65
   1  -2   3 1517.82   18.64
   2  -2   3  877.23   16.89
   3  -2   3  111.71   10.85
   4  -2   3  242.31   18.67
   5  -2   3  227.28   19.59
   6  -2   3    6.18   18.18
   7  -2   3   44.06    9.07
   8  -2   3   21.65    9.35
   9  -2   3  171.30   14.80
  10  -2   3   17.13   25.97
  11  -2   3    4.26   28.93
  12  -2   3   41.12   30.38
  13  -2   3   12.57   31.74
  14  -2   3   34.78   30.99
  15  -2   3    9.64   34.12
 -14  -2   2    6.25   35.39
 -13  -2   2   27.21   31.47
 -12  -2   2  -52.22   33.80
 -11  -2   2  271.07   24.04
 -10  -2   2  279.10   23.40
  -9  -2   2  -11.96   26.72
  -8  -2   2   12.72   13.59
  -7  -2   2  143.16   13.19
  -6  -2   2   17.68    8.23
  -5  -2   2  476.53   21.77
  -4  -2   2   44.94    8.17
  -3  -2   217938.31   94.92
  -2  -2   2   28.06    5.34
  -1  -2   2   25.17    4.20
   0  -2   2 3645.03   22.85
   1  -2   2  385.75   11.11
   2  -2   2   24.62    4.84
   3  -2   2   74.56    6.98
   4  -2   2  492.20   20.21
   5  -2   2  536.69   22.40
   6  -2   2  -26.40   18.38
   7  -2   2  299.22   23.69
   8  -2   2  -25.18   22.35
   9  -2   2  -18.31   23.57
  10  -2   2  -14.31   27.88
  11  -2   2   21.86   28.29
  12  -2   2   50.31   14.02
  13  -2   2   25.36   22.44
  14  -2   2   22.88   34.51
  15  -2   2   22.42   33.27
 -15  -2   1    0.17   35.69
 -14  -2   1   34.80   31.03
 -13  -2   1   17.48   33.15
 -12  -2   1  -29.23   32.79
 -11  -2   1   73.99   13.67
 -10  -2   1   37.86   28.63
  -9  -2   1  130.24   12.92
  -8  -2   1   14.65   21.46
  -7  -2   1  240.79   21.49
  -6  -2   1   90.90    8.46
  -5  -2   1  134.65   10.99
  -4  -2   1 2317.40   28.62
  -3  -2   111128.25   47.22
  -2  -2   1   82.35    7.43
  -1  -2   1  416.54    9.95
   0  -2   1  397.44    9.34
   1  -2   1  658.47   11.43
   2  -2   1  339.85   12.22
   3  -2   1 6272.08   36.85
   4  -2   1  291.58   18.94
   5  -2   1 1361.81   26.69
   6  -2   1  -48.24   18.63
   7  -2   1  177.08   15.67
   8  -2   1   27.63   24.04
   9  -2   1    2.72   24.88
  10  -2   1  105.42   12.86
  11  -2   1   16.78   30.48
  12  -2   1  -19.00   31.91
  13  -2   1   14.39   33.79
  14  -2   1   20.21   33.39
  15  -2   1  -43.49   35.76
 -15  -2   0  -36.30   36.16
 -14  -2   0   13.02   32.61
 -13  -2   0  -15.43   31.07
 -12  -2   0  116.05   14.46
 -11  -2   0    8.24   29.05
 -10  -2   0   18.18   26.50
  -9  -2   0   57.84   10.82
  -8  -2   0   19.02   22.17
  -7  -2   0   67.82    8.85
  -6  -2   0  183.73   13.70
  -5  -2   0  142.56   13.23
  -4  -2   0 1518.10   23.54
  -3  -2   0 6237.39   34.20
  -2  -2   0 2651.91   20.03
  -1  -2   0  224.39    8.32
   0  -2   0  248.23    8.00
   1  -2   0 1219.06   13.81
   2  -2   0 5604.21   30.73
   3  -2   0 3397.47   29.33
   4  -2   0  148.76   12.99
   5  -2   0   66.53    8.16
   6  -2   0  909.74   25.91
   7  -2   0    6.20   20.49
   8  -2   0  717.72   30.61
   9  -2   0   73.60   11.88
  10  -2   0   90.50   12.74
  11  -2   0  114.37   13.89
  12  -2   0   31.30   22.26
  13  -2   0   19.48   31.75
  14  -2   0   36.20   33.69
 -15  -2  -1   18.88   23.81
 -14  -2  -1   -4.54   33.29
 -13  -2  -1   32.36   30.76
 -12  -2  -1   73.85   14.30
 -11  -2  -1  232.04   21.89
 -10  -2  -1   65.17   12.01
  -9  -2  -1   32.17   24.57
  -8  -2  -1   -5.71   20.18
  -7  -2  -1  220.60   20.34
  -6  -2  -1   16.09   18.08
  -5  -2  -1   -4.15   17.30
  -4  -2  -1  609.69   18.65
  -3  -2  -1   66.62    5.79
  -2  -2  -1   17.84    3.59
  -1  -2  -1 3828.04   20.60
   0  -2  -1  666.19   10.62
   1  -2  -1  160.76    9.47
   2  -2  -1 3050.49   25.19
   3  -2  -1 3534.07   31.14
   4  -2  -1   80.16    8.11
   5  -2  -1 1412.66   28.51
   6  -2  -1   77.50    8.84
   7  -2  -1  114.35   10.98
   8  -2  -1   44.86   10.86
   9  -2  -1  -37.22   27.95
  10  -2  -1  -12.86   29.92
  11  -2  -1    4.39   30.18
  12  -2  -1   36.63   30.58
  13  -2  -1  -17.81   32.17
  14  -2  -1   34.86   15.51
 -15  -2  -2  -12.08   33.75
 -14  -2  -2   -6.49   31.30
 -13  -2  -2    3.64   32.16
 -12  -2  -2  146.11   14.19
 -11  -2  -2  -42.61   28.40
 -10  -2  -2   85.05   12.00
  -9  -2  -2  510.63   26.90
  -8  -2  -2  147.29   12.42
  -7  -2  -2  106.69    9.62
  -6  -2  -2  -14.45   18.21
  -5  -2  -2  579.75   20.60
  -4  -2  -2   10.02   14.33
  -3  -2  -2  592.01   15.14
  -2  -2  -2   -6.13    8.61
  -1  -2  -2    9.03    7.60
   0  -2  -2  701.84   12.58
   1  -2  -2   79.09    7.47
   2  -2  -2  641.84   17.16
   3  -2  -2  364.75   18.96
   4  -2  -2  218.39   18.20
   5  -2  -2   -0.40   17.74
   6  -2  -2  226.66   15.55
   7  -2  -2  229.11   17.08
   8  -2  -2   10.43   24.31
   9  -2  -2  331.01   31.35
  10  -2  -2   14.72   20.94
  11  -2  -2   64.90   14.55
  12  -2  -2   70.51   14.35
  13  -2  -2   17.35   32.63
  14  -2  -2   24.30   24.30
 -16  -2  -3   45.30   34.59
 -15  -2  -3   39.55   31.88
 -14  -2  -3   28.25   31.64
 -13  -2  -3   98.01   14.39
 -12  -2  -3  111.64   13.58
 -11  -2  -3   82.81   12.83
 -10  -2  -3   -4.04   26.03
  -9  -2  -3   37.75   10.00
  -8  -2  -3   36.66    9.24
  -7  -2  -3   17.35   18.83
  -6  -2  -3  296.52   20.70
  -5  -2  -3 1093.00   23.66
  -4  -2  -3  650.95   18.80
  -3  -2  -3   35.51    5.56
  -2  -2  -3  172.33   11.68
  -1  -2  -3  461.76   12.46
   0  -2  -3    7.98   10.13
   1  -2  -3 1047.20   18.70
   2  -2  -3  617.09   19.78
   3  -2  -3   21.95   16.60
   4  -2  -3 1288.50   26.65
   5  -2  -3  479.22   22.74
   6  -2  -3   -5.65   20.69
   7  -2  -3  708.18   30.58
   8  -2  -3   20.61   25.30
   9  -2  -3  -23.73   28.29
  10  -2  -3   38.39   31.59
  11  -2  -3  -14.37   32.02
  12  -2  -3   48.59   14.79
  13  -2  -3   40.67   33.09
 -16  -2  -4   30.59   23.67
 -15  -2  -4   24.60   31.89
 -14  -2  -4   -3.15   33.06
 -13  -2  -4   -7.96   31.88
 -12  -2  -4   49.64   12.94
 -11  -2  -4   -9.99   28.65
 -10  -2  -4   19.44   17.62
  -9  -2  -4   29.89   10.08
  -8  -2  -4  331.34   24.59
  -7  -2  -4    9.88   18.65
  -6  -2  -4   61.83    8.31
  -5  -2  -4  656.34   21.41
  -4  -2  -4  346.20   18.76
  -3  -2  -4  205.84   15.30
  -2  -2  -4  589.67   16.29
  -1  -2  -4 1603.19   20.96
   0  -2  -4   -5.51   13.71
   1  -2  -4 2103.96   26.50
   2  -2  -4  477.52   19.30
   3  -2  -4  153.21   13.16
   4  -2  -4  234.57   19.69
   5  -2  -4   87.02    9.28
   6  -2  -4    9.47   22.06
   7  -2  -4   -2.50   25.37
   8  -2  -4   64.51   12.89
   9  -2  -4   29.36   28.08
  10  -2  -4  189.58   18.79
  11  -2  -4   -1.00   31.37
  12  -2  -4    1.83   34.14
  13  -2  -4    5.98   33.11
 -16  -2  -5  -51.13   35.59
 -15  -2  -5   65.96   13.78
 -14  -2  -5   65.54   14.29
 -13  -2  -5   23.53   30.54
 -12  -2  -5    3.92   29.77
 -11  -2  -5  260.25   22.04
 -10  -2  -5    7.87   25.47
  -9  -2  -5   27.89   22.30
  -8  -2  -5  -12.21   20.80
  -7  -2  -5   12.95    8.37
  -6  -2  -5   10.66   12.43
  -5  -2  -5  239.75   19.55
  -4  -2  -5 1261.80   24.14
  -3  -2  -5   12.43   16.98
  -2  -2  -5   17.01    6.86
  -1  -2  -5  148.92   11.59
   0  -2  -5  352.42   17.58
   1  -2  -5  194.20   17.62
   2  -2  -5  423.93   19.36
   3  -2  -5  331.42   20.58
   4  -2  -5   77.47    8.66
   5  -2  -5   17.82    9.58
   6  -2  -5  419.29   27.86
   7  -2  -5  213.03   20.29
   8  -2  -5  681.57   34.77
   9  -2  -5  -21.92   30.57
  10  -2  -5   39.11   31.81
  11  -2  -5   32.07   31.43
  12  -2  -5   12.12   33.23
 -16  -2  -6   16.28   34.07
 -15  -2  -6  -76.29   33.89
 -14  -2  -6   43.39   31.47
 -13  -2  -6  116.70   14.20
 -12  -2  -6   82.95   13.42
 -11  -2  -6  -44.18   27.81
 -10  -2  -6   21.90   25.06
  -9  -2  -6  186.64   17.50
  -8  -2  -6   14.48   19.72
  -7  -2  -6    2.74   19.90
  -6  -2  -6  795.55   25.00
  -5  -2  -6   29.37    8.08
  -4  -2  -6   75.40    8.21
  -3  -2  -6 1382.23   25.55
  -2  -2  -6  566.14   20.04
  -1  -2  -6  323.95   18.32
   0  -2  -6   10.89   17.12
   1  -2  -6    2.49   16.37
   2  -2  -6   -1.35   17.09
   3  -2  -6  375.65   20.66
   4  -2  -6   13.65   21.06
   5  -2  -6   -0.14   22.26
   6  -2  -6  163.36   15.76
   7  -2  -6   25.73   19.92
   8  -2  -6  -16.10   29.52
   9  -2  -6   18.69   30.73
  10  -2  -6   -3.44   22.84
  11  -2  -6   44.60   15.07
  12  -2  -6  -11.35   34.19
 -16  -2  -7   13.06   33.10
 -15  -2  -7   30.37   32.45
 -14  -2  -7   64.31   14.63
 -13  -2  -7  -29.76   31.64
 -12  -2  -7   27.04   28.49
 -11  -2  -7   18.66   12.41
 -10  -2  -7   69.35   12.08
  -9  -2  -7  355.59   25.67
  -8  -2  -7   61.82    9.99
  -7  -2  -7  503.04   24.43
  -6  -2  -7  115.56   11.34
  -5  -2  -7    6.96   18.57
  -4  -2  -7  252.51   20.05
  -3  -2  -7  233.98   19.66
  -2  -2  -7  819.71   23.60
  -1  -2  -7  -25.34   17.24
   0  -2  -7    3.28   17.69
   1  -2  -7  140.91   13.52
   2  -2  -7    5.13   17.16
   3  -2  -7   92.85    8.60
   4  -2  -7   56.43    9.47
   5  -2  -7   25.35   10.72
   6  -2  -7   13.59   11.51
   7  -2  -7  156.08   14.54
   8  -2  -7  121.99   14.05
   9  -2  -7   32.97   14.00
  10  -2  -7   98.98   14.48
  11  -2  -7  -19.14   35.96
 -16  -2  -8   25.82   33.35
 -15  -2  -8  -29.13   35.19
 -14  -2  -8   -0.32   33.68
 -13  -2  -8   19.12   29.35
 -12  -2  -8   58.16   13.27
 -11  -2  -8   -5.54   28.30
 -10  -2  -8    4.29   26.01
  -9  -2  -8  190.09   18.30
  -8  -2  -8    9.34   22.26
  -7  -2  -8  232.61   16.58
  -6  -2  -8 1742.85   33.14
  -5  -2  -8 1710.89   32.19
  -4  -2  -8  -31.90   18.93
  -3  -2  -8  -39.41   18.15
  -2  -2  -8 1025.36   25.96
  -1  -2  -8   53.36    8.17
   0  -2  -8  109.05   10.80
   1  -2  -8   -4.56   18.40
   2  -2  -8  171.60   14.34
   3  -2  -8    3.72   19.59
   4  -2  -8  -18.68   23.57
   5  -2  -8  111.40   11.72
   6  -2  -8  139.31   12.66
   7  -2  -8   -9.56   28.78
   8  -2  -8   42.25   13.67
   9  -2  -8   16.92   32.94
  10  -2  -8   -9.86   34.49
  11  -2  -8  -21.18   34.17
 -16  -2  -9  -21.44   34.90
 -15  -2  -9  -27.81   33.52
 -14  -2  -9   10.74   32.39
 -13  -2  -9   13.41   31.37
 -12  -2  -9  -13.09   29.27
 -11  -2  -9  -22.61   28.55
 -10  -2  -9  196.55   16.31
  -9  -2  -9   35.14   23.64
  -8  -2  -9    7.22   23.40
  -7  -2  -9  143.43   13.55
  -6  -2  -9  123.61   11.14
  -5  -2  -9   32.61    9.14
  -4  -2  -9 1497.33   30.69
  -3  -2  -9  637.05   24.64
  -2  -2  -9  367.83   22.75
  -1  -2  -9  327.10   21.74
   0  -2  -9   -1.36   19.24
   1  -2  -9  758.21   26.46
   2  -2  -9   18.23   20.82
   3  -2  -9   66.04    9.98
   4  -2  -9   32.69   24.14
   5  -2  -9   64.14   12.03
   6  -2  -9  -29.58   26.97
   7  -2  -9   23.81   29.88
   8  -2  -9  128.55   14.42
   9  -2  -9  -35.69   34.98
  10  -2  -9   23.07   34.72
 -16  -2 -10   18.32   34.19
 -15  -2 -10   -7.34   33.48
 -14  -2 -10    2.57   31.64
 -13  -2 -10   47.78   14.01
 -12  -2 -10  -20.45   30.60
 -11  -2 -10   67.20   13.14
 -10  -2 -10    9.93   27.02
  -9  -2 -10   35.36   26.25
  -8  -2 -10   26.94   18.03
  -7  -2 -10  -43.43   24.20
  -6  -2 -10  273.55   24.91
  -5  -2 -10  391.72   24.71
  -4  -2 -10  683.87   26.60
  -3  -2 -10   71.52    9.42
  -2  -2 -10    2.60   20.93
  -1  -2 -10   99.80   10.12
   0  -2 -10  250.55   22.90
   1  -2 -10   22.81   21.86
   2  -2 -10   -8.84   23.50
   3  -2 -10  118.08   11.41
   4  -2 -10   47.91   11.48
   5  -2 -10  -19.88   27.17
   6  -2 -10  276.32   22.29
   7  -2 -10  -34.93   31.08
   8  -2 -10   41.30   34.58
   9  -2 -10   -1.93   34.61
 -16  -2 -11   13.34   34.97
 -15  -2 -11   35.38   14.60
 -14  -2 -11   18.22   31.83
 -13  -2 -11    8.11   21.42
 -12  -2 -11  -46.31   31.52
 -11  -2 -11   52.87   13.58
 -10  -2 -11   42.85   30.07
  -9  -2 -11   97.57   12.45
  -8  -2 -11  206.49   20.29
  -7  -2 -11  -24.94   24.80
  -6  -2 -11   86.65   10.87
  -5  -2 -11  798.54   32.01
  -4  -2 -11  771.14   30.17
  -3  -2 -11  193.02   16.70
  -2  -2 -11    0.61   22.93
  -1  -2 -11  122.01   10.79
   0  -2 -11   84.77   10.92
   1  -2 -11   52.38   11.30
   2  -2 -11   34.76   25.57
   3  -2 -11   33.22   24.58
   4  -2 -11   21.86   25.84
   5  -2 -11   27.37   26.65
   6  -2 -11   35.91   30.06
   7  -2 -11  -24.79   31.18
   8  -2 -11   28.07   31.38
   9  -2 -11  -22.96   36.08
 -15  -2 -12  -56.72   35.56
 -14  -2 -12   10.60   31.91
 -13  -2 -12  -12.63   32.59
 -12  -2 -12   12.21   29.17
 -11  -2 -12   35.43   31.62
 -10  -2 -12  -19.90   29.76
  -9  -2 -12  -16.35   30.56
  -8  -2 -12   44.84   12.19
  -7  -2 -12  -10.41   26.66
  -6  -2 -12    4.40   26.45
  -5  -2 -12  419.58   29.63
  -4  -2 -12   34.64   25.58
  -3  -2 -12   -4.07   25.09
  -2  -2 -12  105.58   11.57
  -1  -2 -12   13.16   26.81
   0  -2 -12    4.11   26.43
   1  -2 -12   13.30   18.63
   2  -2 -12  118.42   12.47
   3  -2 -12   31.99   12.39
   4  -2 -12   13.10   28.49
   5  -2 -12  149.22   14.88
   6  -2 -12   41.89   13.43
   7  -2 -12   49.95   14.81
   8  -2 -12   32.69   36.53
 -15  -2 -13  -20.52   33.37
 -14  -2 -13   88.56   15.05
 -13  -2 -13  -63.67   33.23
 -12  -2 -13   13.28   29.93
 -11  -2 -13    5.67   31.82
 -10  -2 -13  222.51   19.38
  -9  -2 -13   -4.45   29.76
  -8  -2 -13   17.18   27.89
  -7  -2 -13  102.89   12.90
  -6  -2 -13  -11.37   27.81
  -5  -2 -13   55.05   12.56
  -4  -2 -13  255.69   21.32
  -3  -2 -13   56.25   12.27
  -2  -2 -13   26.05   19.48
  -1  -2 -13   26.35   27.30
   0  -2 -13  609.10   34.51
   1  -2 -13   24.47   28.02
   2  -2 -13   34.12   26.52
   3  -2 -13   67.19   12.85
   4  -2 -13   16.87   28.94
   5  -2 -13   -7.04   31.40
   6  -2 -13   77.18   14.44
   7  -2 -13   33.75   14.86
 -15  -2 -14  -61.63   35.99
 -14  -2 -14   -1.55   23.84
 -13  -2 -14  -17.62   33.21
 -12  -2 -14   11.35   31.30
 -11  -2 -14  -10.27   31.51
 -10  -2 -14  111.35   14.23
  -9  -2 -14   26.11   29.21
  -8  -2 -14    2.91   28.58
  -7  -2 -14  -19.70   20.72
  -6  -2 -14   87.18   13.35
  -5  -2 -14    3.80   28.72
  -4  -2 -14  -13.88   27.34
  -3  -2 -14   25.61   27.92
  -2  -2 -14  154.86   15.20
  -1  -2 -14   -3.94   30.30
   0  -2 -14   42.34   13.86
   1  -2 -14  -39.69   30.37
   2  -2 -14  -18.97   29.68
   3  -2 -14   11.25   31.06
   4  -2 -14  -23.89   30.46
   5  -2 -14    3.32   29.34
   6  -2 -14  106.62   14.87
 -14  -2 -15   37.56   33.01
 -13  -2 -15   33.01   33.46
 -12  -2 -15   23.42   31.24
 -11  -2 -15   43.14   30.04
 -10  -2 -15  -10.74   32.86
  -9  -2 -15    8.94   30.12
  -8  -2 -15  -18.64   31.80
  -7  -2 -15   35.65   29.43
  -6  -2 -15   62.81   13.75
  -5  -2 -15   32.17   13.03
  -4  -2 -15  -24.20   29.76
  -3  -2 -15   80.02   13.44
  -2  -2 -15  131.03   13.87
  -1  -2 -15   75.70   13.77
   0  -2 -15   -2.15   30.59
   1  -2 -15  -20.78   30.88
   2  -2 -15  -26.03   30.89
   3  -2 -15  -46.61   31.50
   4  -2 -15  185.46   16.87
   5  -2 -15   32.96   22.43
 -13  -2 -16   18.76   31.98
 -12  -2 -16   -2.70   33.96
 -11  -2 -16   42.93   14.06
 -10  -2 -16   25.14   30.46
  -9  -2 -16  -38.21   30.99
  -8  -2 -16   35.35   33.26
  -7  -2 -16  227.94   19.22
  -6  -2 -16  217.84   19.68
  -5  -2 -16    0.05   31.50
  -4  -2 -16   14.88   31.89
  -3  -2 -16   27.37   20.73
  -2  -2 -16   31.18   29.47
  -1  -2 -16   24.33   31.01
   0  -2 -16   -2.79   31.79
   1  -2 -16   25.74   17.71
   2  -2 -16   19.59   21.69
   3  -2 -16  -38.06   33.63
 -13  -2 -17  -50.55   37.95
 -12  -2 -17    2.62   23.83
 -11  -2 -17   31.48   32.88
 -10  -2 -17    1.04   32.35
  -9  -2 -17   27.16   30.46
  -8  -2 -17  -24.24   34.47
  -7  -2 -17    9.53   31.27
  -6  -2 -17  -16.53   34.00
  -5  -2 -17   18.65   30.53
  -4  -2 -17   33.82   31.16
  -3  -2 -17   11.99   32.98
  -2  -2 -17   98.78   15.01
  -1  -2 -17   37.80   34.31
   0  -2 -17   -6.06   33.55
   1  -2 -17    0.22   33.74
   2  -2 -17   42.59   15.54
 -11  -2 -18   28.62   34.77
 -10  -2 -18  -15.44   33.24
  -9  -2 -18   45.44   15.36
  -8  -2 -18   17.21   35.04
  -7  -2 -18   11.75   32.01
  -6  -2 -18   38.69   32.89
  -5  -2 -18   -8.89   32.90
  -4  -2 -18   35.52   14.86
  -3  -2 -18   -0.59   33.83
  -2  -2 -18   66.26   15.43
  -1  -2 -18   22.68   32.77
   0  -2 -18  -17.52   36.74
 -10  -2 -19   22.40   24.13
  -9  -2 -19   33.22   15.57
  -8  -2 -19  -11.78   33.40
  -7  -2 -19   -0.39   33.75
  -6  -2 -19   17.25   32.44
  -5  -2 -19   33.66   22.78
  -4  -2 -19   -2.35   34.87
  -3  -2 -19    3.13   34.89
  -2  -2 -19  -38.98   35.23
   3  -3  19  -13.37   36.45
   4  -3  19   29.19   34.96
   5  -3  19   27.39   19.60
   6  -3  19 -103.18   37.43
   7  -3  19   30.34   33.49
   0  -3  18   48.76   33.24
   1  -3  18  -47.83   36.54
   2  -3  18   66.29   15.92
   3  -3  18   61.47   15.50
   4  -3  18    7.66   32.45
   5  -3  18   18.80   32.54
   6  -3  18   98.33   15.19
   7  -3  18   21.40   34.61
   8  -3  18   23.38   24.43
   9  -3  18  -16.01   32.80
  10  -3  18  -81.07   36.45
  -2  -3  17   39.01   34.37
  -1  -3  17  -20.01   34.90
   0  -3  17  -18.47   33.36
   1  -3  17   32.61   14.92
   2  -3  17   23.73   31.71
   3  -3  17   36.44   34.14
   4  -3  17   42.80   31.82
   5  -3  17  -10.13   31.30
   6  -3  17   -7.47   32.43
   7  -3  17  -12.54   33.41
   8  -3  17   -2.30   34.92
   9  -3  17  -24.29   33.23
  10  -3  17   14.21   32.85
  11  -3  17   -8.92   34.56
  -4  -3  16   13.95   36.69
  -3  -3  16   -7.21   36.09
  -2  -3  16  127.61   16.08
  -1  -3  16   12.89   33.19
   0  -3  16  108.01   14.91
   1  -3  16   10.98   30.49
   2  -3  16  -51.67   33.06
   3  -3  16   39.73   32.68
   4  -3  16   77.06   14.26
   5  -3  16  203.15   16.80
   6  -3  16  135.15   14.79
   7  -3  16   38.09   34.23
   8  -3  16  -18.42   33.04
   9  -3  16    9.44   31.25
  10  -3  16   52.94   14.78
  11  -3  16   41.49   14.33
  12  -3  16   37.81   30.91
  -5  -3  15   14.01   33.84
  -4  -3  15   47.95   36.99
  -3  -3  15   32.64   33.03
  -2  -3  15   95.10   15.59
  -1  -3  15   18.98   30.89
   0  -3  15   30.67   29.36
   1  -3  15    5.20   31.55
   2  -3  15   26.47   29.34
   3  -3  15   16.10   30.02
   4  -3  15   45.94   30.90
   5  -3  15  -49.60   32.82
   6  -3  15  236.43   20.07
   7  -3  15   29.35   30.63
   8  -3  15   71.09   14.24
   9  -3  15  -18.96   30.95
  10  -3  15  -16.70   31.30
  11  -3  15   47.39   33.28
  12  -3  15   10.28   23.69
  13  -3  15   30.34   32.10
  -6  -3  14   27.49   22.98
  -5  -3  14  103.39   15.26
  -4  -3  14   -3.30   34.91
  -3  -3  14   73.98   14.59
  -2  -3  14   32.69   22.10
  -1  -3  14   16.60   30.28
   0  -3  14  -42.92   31.36
   1  -3  14   45.19   30.64
   2  -3  14  229.05   22.43
   3  -3  14   63.35   13.18
   4  -3  14  116.51   14.03
   5  -3  14   36.31   31.79
   6  -3  14   -9.11   31.18
   7  -3  14   23.22   31.71
   8  -3  14   61.97   13.59
   9  -3  14  -32.08   32.73
  10  -3  14  -27.37   31.72
  11  -3  14  137.27   14.99
  12  -3  14   -5.04   31.07
  13  -3  14    5.34   33.34
  -7  -3  13  -20.77   32.30
  -6  -3  13    1.75   32.21
  -5  -3  13   44.02   31.57
  -4  -3  13  164.42   16.15
  -3  -3  13   45.53   13.77
  -2  -3  13   36.91   30.92
  -1  -3  13   22.28   29.71
   0  -3  13  162.24   15.12
   1  -3  13  293.19   22.95
   2  -3  13   79.22   12.91
   3  -3  13   11.15   27.36
   4  -3  13  109.50   13.02
   5  -3  13    8.91   28.65
   6  -3  13   26.03   27.45
   7  -3  13  157.34   15.40
   8  -3  13   -0.24   30.28
   9  -3  13   79.90   14.11
  10  -3  13   10.10   21.01
  11  -3  13  -17.69   30.35
  12  -3  13   43.43   29.43
  13  -3  13   25.38   32.06
  14  -3  13    0.74   33.91
  -8  -3  12   34.25   15.06
  -7  -3  12    4.97   31.67
  -6  -3  12  145.04   14.57
  -5  -3  12  -53.12   30.05
  -4  -3  12   21.09   21.72
  -3  -3  12   23.90   28.56
  -2  -3  12   -5.31   29.57
  -1  -3  12  182.32   14.90
   0  -3  12   39.40   26.70
   1  -3  12  150.88   13.01
   2  -3  12   -2.87   25.90
   3  -3  12  170.38   16.41
   4  -3  12  -29.36   27.46
   5  -3  12  144.49   14.30
   6  -3  12   82.81   12.55
   7  -3  12    1.59   27.29
   8  -3  12   46.23   13.19
   9  -3  12  -29.08   30.40
  10  -3  12    1.42   31.38
  11  -3  12  -29.26   30.57
  12  -3  12   -9.42   31.42
  13  -3  12   54.41   14.81
  14  -3  12    8.32   35.68
  -9  -3  11   43.54   14.92
  -8  -3  11   17.82   30.69
  -7  -3  11   33.92   13.70
  -6  -3  11   67.28   13.67
  -5  -3  11  128.93   13.78
  -4  -3  11  -17.25   29.91
  -3  -3  11   14.93   20.11
  -2  -3  11  308.09   29.77
  -1  -3  11   22.21   26.72
   0  -3  11   35.79   24.02
   1  -3  11  565.12   29.84
   2  -3  11  133.39   11.57
   3  -3  11   -3.23   25.91
   4  -3  11  111.13   11.49
   5  -3  11  227.72   18.70
   6  -3  11   19.69   25.44
   7  -3  11  132.65   12.58
   8  -3  11   36.82   27.47
   9  -3  11    1.99   28.26
  10  -3  11   23.62   13.04
  11  -3  11   12.20   29.51
  12  -3  11    5.67   32.12
  13  -3  11  -16.19   32.27
  14  -3  11   34.89   30.92
 -10  -3  10   -6.35   33.50
  -9  -3  10   15.01   23.54
  -8  -3  10   45.17   32.15
  -7  -3  10   43.17   13.90
  -6  -3  10   -0.73   27.22
  -5  -3  10  144.13   13.32
  -4  -3  10  135.60   12.95
  -3  -3  10  139.61   13.89
  -2  -3  10   18.98   11.38
  -1  -3  10  112.82   11.78
   0  -3  10  303.97   25.34
   1  -3  10    1.93   21.67
   2  -3  10  177.23   16.55
   3  -3  10  418.84   26.70
   4  -3  10   25.43   22.36
   5  -3  10   17.72   23.21
   6  -3  10    5.34   23.85
   7  -3  10   23.36   25.72
   8  -3  10   96.53   12.33
   9  -3  10  -24.55   29.88
  10  -3  10   70.26   13.32
  11  -3  10   27.26   20.75
  12  -3  10  -17.21   29.68
  13  -3  10   -1.44   30.38
  14  -3  10   10.31   34.38
  15  -3  10   27.09   14.88
 -11  -3   9  -25.32   36.95
 -10  -3   9   -9.20   36.94
  -9  -3   9  -24.57   33.26
  -8  -3   9   16.87   31.89
  -7  -3   9  276.62   24.04
  -6  -3   9   13.62   27.75
  -5  -3   9  131.93   12.45
  -4  -3   9   92.54   11.40
  -3  -3   9  -11.73   24.64
  -2  -3   9   87.74   10.73
  -1  -3   9  537.02   27.73
   0  -3   9   93.47    9.71
   1  -3   9    9.66   19.96
   2  -3   9  318.50   23.28
   3  -3   9  198.36   15.73
   4  -3   9   57.44    9.50
   5  -3   9   30.27   22.09
   6  -3   9  152.61   13.96
   7  -3   9   -0.79   24.22
   8  -3   9   31.24   26.02
   9  -3   9  591.30   33.37
  10  -3   9  375.49   33.68
  11  -3   9  -35.23   29.90
  12  -3   9    8.85   30.08
  13  -3   9   99.23   14.22
  14  -3   9   21.48   15.22
  15  -3   9   -3.46   35.78
 -11  -3   8   24.75   32.88
 -10  -3   8   36.27   33.18
  -9  -3   8  -27.82   33.76
  -8  -3   8  -20.81   31.26
  -7  -3   8   28.36   28.70
  -6  -3   8  168.69   13.84
  -5  -3   8   48.71   11.34
  -4  -3   8   89.25   10.20
  -3  -3   8  312.93   25.55
  -2  -3   8   68.76    9.83
  -1  -3   8   91.48    9.43
   0  -3   8  105.50   10.26
   1  -3   8   -0.70   18.95
   2  -3   8    6.67   18.31
   3  -3   8  157.88   14.21
   4  -3   8  378.66   23.02
   5  -3   8   49.84    9.19
   6  -3   8   37.10    9.73
   7  -3   8   79.69   10.54
   8  -3   8  182.03   15.24
   9  -3   8  147.53   14.70
  10  -3   8   21.54   28.09
  11  -3   8  136.16   14.12
  12  -3   8   45.79   13.67
  13  -3   8   38.59   30.29
  14  -3   8  -27.13   33.43
  15  -3   8  -31.70   36.77
 -12  -3   7    8.09   24.50
 -11  -3   7   -0.50   33.10
 -10  -3   7  -41.72   34.22
  -9  -3   7  -16.54   32.18
  -8  -3   7  168.51   15.99
  -7  -3   7   83.08   12.56
  -6  -3   7  216.49   19.26
  -5  -3   7   96.27   10.90
  -4  -3   7  142.85   13.14
  -3  -3   7   -2.31   19.40
  -2  -3   7  392.46   22.00
  -1  -3   7  542.23   23.46
   0  -3   7  516.03   22.84
   1  -3   7   55.68    8.39
   2  -3   7   89.75    8.49
   3  -3   7   26.00   17.80
   4  -3   7  658.31   24.77
   5  -3   7  -48.98   20.13
   6  -3   7   99.28    9.41
   7  -3   7   92.44   10.15
   8  -3   7  314.86   25.32
   9  -3   7  -11.81   27.49
  10  -3   7   91.17   12.86
  11  -3   7   13.28   20.64
  12  -3   7   25.72   29.14
  13  -3   7   41.33   14.14
  14  -3   7    6.28   32.02
  15  -3   7   17.85   24.84
 -12  -3   6   -0.66   34.52
 -11  -3   6  196.20   17.85
 -10  -3   6   -4.70   32.01
  -9  -3   6  411.80   35.54
  -8  -3   6  168.47   15.66
  -7  -3   6   32.24   25.46
  -6  -3   6  264.26   19.17
  -5  -3   6  182.76   16.91
  -4  -3   6  724.10   25.47
  -3  -3   6  575.01   23.53
  -2  -3   6  109.48   10.63
  -1  -3   6  297.75   20.64
   0  -3   6    8.77   17.95
   1  -3   6  313.77   19.46
   2  -3   6   21.99   17.32
   3  -3   6    7.40   17.50
   4  -3   6   85.63    8.42
   5  -3   6  244.44   22.07
   6  -3   6   20.01    8.63
   7  -3   6   40.33    9.55
   8  -3   6   30.02   23.73
   9  -3   6  270.36   19.55
  10  -3   6  188.69   17.01
  11  -3   6  -34.81   29.45
  12  -3   6   44.67   29.83
  13  -3   6    2.03   31.88
  14  -3   6  -28.84   32.24
  15  -3   6   22.46   33.14
 -13  -3   5   74.85   16.10
 -12  -3   5   -3.28   35.25
 -11  -3   5  -22.43   31.77
 -10  -3   5   41.55   14.17
  -9  -3   5  102.81   13.66
  -8  -3   5  -36.87   28.66
  -7  -3   5    7.87   27.13
  -6  -3   5   79.16   10.57
  -5  -3   5 1701.38   33.84
  -4  -3   5    1.64   18.99
  -3  -3   5  341.73   21.32
  -2  -3   5  973.83   24.63
  -1  -3   5   46.30    7.75
   0  -3   5   52.93    7.78
   1  -3   5   43.81    7.72
   2  -3   5  677.16   22.27
   3  -3   5  -11.41   17.95
   4  -3   5   17.06   17.22
   5  -3   5   17.70   18.70
   6  -3   5   24.78   18.59
   7  -3   5  -13.68   21.64
   8  -3   5  144.96   12.58
   9  -3   5   18.64   11.44
  10  -3   5  -11.39   29.07
  11  -3   5   40.90   12.67
  12  -3   5   70.81   13.43
  13  -3   5   30.92   29.78
  14  -3   5  -31.70   31.51
  15  -3   5  -21.43   35.12
 -13  -3   4  -70.85   37.02
 -12  -3   4    2.73   34.26
 -11  -3   4   36.17   31.48
 -10  -3   4   89.77   14.34
  -9  -3   4  339.83   32.17
  -8  -3   4   92.46   11.59
  -7  -3   4   -5.88   23.82
  -6  -3   4  563.37   27.06
  -5  -3   4  325.60   23.10
  -4  -3   4  113.53   10.90
  -3  -3   4 1004.08   24.36
  -2  -3   4  620.22   20.50
  -1  -3   4  139.02   12.09
   0  -3   4 1058.60   22.01
   1  -3   4   29.58    7.01
   2  -3   4  824.80   21.52
   3  -3   4  155.48   12.66
   4  -3   4    2.79   17.61
   5  -3   4  -11.19   17.81
   6  -3   4   10.75   18.47
   7  -3   4  687.02   27.86
   8  -3   4  284.86   26.22
   9  -3   4  -22.84   25.25
  10  -3   4   -3.38   26.94
  11  -3   4    6.22   31.41
  12  -3   4   28.35   13.15
  13  -3   4   36.62   31.49
  14  -3   4   25.47   35.56
  15  -3   4   42.51   31.06
 -14  -3   3  -17.82   35.25
 -13  -3   3   57.16   14.85
 -12  -3   3   20.46   33.07
 -11  -3   3   55.55   14.38
 -10  -3   3  147.75   13.90
  -9  -3   3    7.34   27.94
  -8  -3   3  203.63   18.64
  -7  -3   3   29.82   21.98
  -6  -3   3  -25.66   20.57
  -5  -3   3 3490.93   40.22
  -4  -3   3  313.67   20.54
  -3  -3   3  276.32   19.00
  -2  -3   3 1613.49   24.84
  -1  -3   3  558.57   17.47
   0  -3   3 1652.14   22.46
   1  -3   3  215.49   14.76
   2  -3   3  102.43    9.23
   3  -3   3   80.31    7.74
   4  -3   3   41.65    7.98
   5  -3   3  -28.30   18.28
   6  -3   3   57.79    8.47
   7  -3   3  274.96   22.35
   8  -3   3   62.24   10.41
   9  -3   3   55.78   11.52
  10  -3   3  -75.97   29.22
  11  -3   3   14.02   28.60
  12  -3   3  -16.07   30.32
  13  -3   3    3.65   33.34
  14  -3   3    1.06   33.03
  15  -3   3  -24.54   33.33
 -14  -3   2   11.89   24.43
 -13  -3   2    0.37   30.50
 -12  -3   2    7.68   30.77
 -11  -3   2    6.21   30.81
 -10  -3   2  181.11   15.27
  -9  -3   2   86.27   11.75
  -8  -3   2   32.50   22.66
  -7  -3   2   40.79    9.53
  -6  -3   2  122.47   11.50
  -5  -3   2   -1.49   17.68
  -4  -3   2  457.95   20.38
  -3  -3   2  336.48   17.87
  -2  -3   2  211.55   14.71
  -1  -3   2  181.15   12.96
   0  -3   2  733.76   15.91
   1  -3   2 2230.39   22.80
   2  -3   2   18.48    6.17
   3  -3   2   48.80    7.38
   4  -3   2  411.37   20.87
   5  -3   2  620.77   23.02
   6  -3   2   16.83   18.72
   7  -3   2   16.32   20.47
   8  -3   2   30.53   23.19
   9  -3   2   10.78   25.81
  10  -3   2   40.53   28.05
  11  -3   2  225.61   22.43
  12  -3   2   23.81   30.90
  13  -3   2   17.39   31.38
  14  -3   2   -3.37   32.63
 -15  -3   1  -55.74   36.75
 -14  -3   1   42.51   32.24
 -13  -3   1   31.17   32.55
 -12  -3   1   32.61   31.83
 -11  -3   1  287.43   24.62
 -10  -3   1   20.22   27.78
  -9  -3   1  114.19   11.70
  -8  -3   1   38.09   10.01
  -7  -3   1  112.75   10.34
  -6  -3   1  168.42   13.83
  -5  -3   1   80.15    8.35
  -4  -3   1 4018.03   35.56
  -3  -3   1  423.01   17.36
  -2  -3   1  274.21   13.33
  -1  -3   1  812.37   15.13
   0  -3   1  152.92   10.94
   1  -3   1 8342.30   37.96
   2  -3   1 7070.31   38.70
   3  -3   117392.12   96.74
   4  -3   1 2669.07   32.45
   5  -3   1  306.43   20.87
   6  -3   1  110.47   10.00
   7  -3   1  289.94   23.43
   8  -3   1  166.71   14.53
   9  -3   1   28.55   26.73
  10  -3   1  186.70   17.16
  11  -3   1   -6.05   30.06
  12  -3   1   12.84   32.68
  13  -3   1    4.52   22.88
  14  -3   1   21.94   33.79
 -15  -3   0   -0.91   33.58
 -14  -3   0   45.56   31.55
 -13  -3   0   10.50   32.14
 -12  -3   0   77.73   13.92
 -11  -3   0   29.55   20.72
 -10  -3   0   37.12   27.82
  -9  -3   0  114.69   11.31
  -8  -3   0  116.52   11.43
  -7  -3   0  628.91   24.32
  -6  -3   0   17.90   13.39
  -5  -3   0  121.05   10.70
  -4  -3   0   92.65    8.47
  -3  -3   0  539.44   16.73
  -2  -3   0  411.80   13.75
  -1  -3   0 1867.92   18.51
   0  -3   0   72.88    7.08
   1  -3   0 1018.90   16.60
   2  -3   0  191.67   14.71
   3  -3   0   61.09    7.56
   4  -3   0   83.00    8.23
   5  -3   0  254.66   21.22
   6  -3   0 1137.14   28.23
   7  -3   0    8.40   22.33
   8  -3   0  194.33   18.60
   9  -3   0  222.05   20.49
  10  -3   0  103.33   13.46
  11  -3   0   16.75   30.29
  12  -3   0   63.00   14.13
  13  -3   0   42.96   14.25
  14  -3   0   19.56   23.87
 -15  -3  -1  -39.32   34.89
 -14  -3  -1   23.82   22.43
 -13  -3  -1   39.85   31.70
 -12  -3  -1  126.59   13.78
 -11  -3  -1   50.27   13.06
 -10  -3  -1   57.50   11.90
  -9  -3  -1   66.03   10.83
  -8  -3  -1   14.51   20.42
  -7  -3  -1   26.71   18.81
  -6  -3  -1  164.14   13.51
  -5  -3  -1  104.75   10.28
  -4  -3  -1  606.55   19.34
  -3  -3  -1   25.37    5.66
  -2  -3  -1   82.24    7.57
  -1  -3  -1  301.30   11.09
   0  -3  -1  172.19   11.28
   1  -3  -1  127.81   12.23
   2  -3  -1 3100.94   28.58
   3  -3  -1  737.13   21.56
   4  -3  -1 1478.23   27.82
   5  -3  -1  662.87   24.62
   6  -3  -1  -23.80   20.35
   7  -3  -1  138.14   13.48
   8  -3  -1   42.96   10.97
   9  -3  -1  -22.38   27.42
  10  -3  -1   36.63   13.02
  11  -3  -1   11.21   30.16
  12  -3  -1   22.40   17.94
  13  -3  -1   -3.99   33.89
  14  -3  -1   19.94   35.80
 -15  -3  -2   -9.22   35.73
 -14  -3  -2   12.52   33.01
 -13  -3  -2  -42.40   31.78
 -12  -3  -2  261.05   22.94
 -11  -3  -2   15.33   20.19
 -10  -3  -2  137.31   13.35
  -9  -3  -2   -4.60   22.93
  -8  -3  -2   12.20   14.36
  -7  -3  -2  194.32   15.03
  -6  -3  -2   38.78    8.13
  -5  -3  -2   25.07   17.45
  -4  -3  -2  282.02   17.33
  -3  -3  -2  332.22   15.15
  -2  -3  -2   67.94    6.59
  -1  -3  -2  756.92   14.93
   0  -3  -2  584.62   14.49
   1  -3  -2   59.03    5.97
   2  -3  -2  205.23   16.72
   3  -3  -2  666.82   21.50
   4  -3  -2  186.30   13.67
   5  -3  -2   23.75   17.94
   6  -3  -2  427.05   25.44
   7  -3  -2   99.43   10.79
   8  -3  -2  -17.85   26.49
   9  -3  -2    6.69   28.67
  10  -3  -2   -9.49   31.12
  11  -3  -2   55.51   14.40
  12  -3  -2  -25.08   33.02
  13  -3  -2  -15.06   33.88
 -16  -3  -3   31.89   24.59
 -15  -3  -3   35.70   31.46
 -14  -3  -3  -57.48   32.51
 -13  -3  -3   56.24   14.10
 -12  -3  -3   26.83   30.18
 -11  -3  -3   30.37   12.26
 -10  -3  -3  -18.19   25.27
  -9  -3  -3  125.71   11.90
  -8  -3  -3  -38.81   20.75
  -7  -3  -3  304.04   21.70
  -6  -3  -3   51.58    8.14
  -5  -3  -3  204.67   19.16
  -4  -3  -3  159.70   12.14
  -3  -3  -3   25.90    6.42
  -2  -3  -3   86.26    7.50
  -1  -3  -3   13.25    5.41
   0  -3  -3  107.32    9.63
   1  -3  -3   64.50    6.80
   2  -3  -3   29.87    7.36
   3  -3  -3  232.28   18.60
   4  -3  -3 1581.24   29.68
   5  -3  -3  -34.79   19.83
   6  -3  -3  457.20   26.81
   7  -3  -3  -32.78   24.53
   8  -3  -3   14.33   26.96
   9  -3  -3   38.39   27.23
  10  -3  -3   20.27   29.07
  11  -3  -3   20.31   30.58
  12  -3  -3   22.22   23.97
  13  -3  -3   47.02   15.26
 -16  -3  -4   14.01   34.33
 -15  -3  -4   -2.04   33.47
 -14  -3  -4    9.53   31.77
 -13  -3  -4  208.83   18.83
 -12  -3  -4   39.58   28.89
 -11  -3  -4   13.52   28.80
 -10  -3  -4   35.81   25.90
  -9  -3  -4  449.44   26.63
  -8  -3  -4   61.15    9.55
  -7  -3  -4   25.54    8.25
  -6  -3  -4  751.56   23.21
  -5  -3  -4  425.15   20.44
  -4  -3  -4  253.59   17.95
  -3  -3  -4  227.98   17.38
  -2  -3  -4   19.21   14.55
  -1  -3  -4  312.29   16.05
   0  -3  -4  112.59   10.83
   1  -3  -4 1644.08   25.67
   2  -3  -4   17.55   16.93
   3  -3  -4   43.53    7.59
   4  -3  -4  408.11   22.61
   5  -3  -4  990.04   29.20
   6  -3  -4  389.05   27.74
   7  -3  -4   29.51   11.44
   8  -3  -4  210.52   16.96
   9  -3  -4  -29.52   29.59
  10  -3  -4  107.24   13.75
  11  -3  -4   17.51   13.89
  12  -3  -4  -34.64   34.41
  13  -3  -4  -21.13   35.95
 -16  -3  -5   32.85   34.92
 -15  -3  -5   44.68   33.76
 -14  -3  -5   43.38   31.84
 -13  -3  -5    5.93   30.87
 -12  -3  -5   22.01   28.48
 -11  -3  -5  271.09   21.53
 -10  -3  -5   -4.97   26.02
  -9  -3  -5   17.74   10.27
  -8  -3  -5    4.32   19.97
  -7  -3  -5  -21.41   19.09
  -6  -3  -5   24.10   17.51
  -5  -3  -5   17.09   17.43
  -4  -3  -5  382.38   19.83
  -3  -3  -5  146.03   12.55
  -2  -3  -5  128.81   12.11
  -1  -3  -5    9.40    7.20
   0  -3  -5  173.27   16.90
   1  -3  -5   35.34    7.31
   2  -3  -5  167.33   12.70
   3  -3  -5   57.72    7.99
   4  -3  -5  298.04   21.82
   5  -3  -5  -16.11   22.45
   6  -3  -5  122.14   11.28
   7  -3  -5   21.16   26.05
   8  -3  -5  217.47   17.68
   9  -3  -5    5.23   29.90
  10  -3  -5  -54.08   32.03
  11  -3  -5   87.96   14.52
  12  -3  -5  -15.58   33.37
 -16  -3  -6  -32.05   35.21
 -15  -3  -6   -2.61   32.87
 -14  -3  -6  -44.71   33.07
 -13  -3  -6    8.14   32.58
 -12  -3  -6  -34.10   30.15
 -11  -3  -6   75.30   12.84
 -10  -3  -6  200.60   19.49
  -9  -3  -6  158.61   14.10
  -8  -3  -6  230.80   22.81
  -7  -3  -6    7.11    9.66
  -6  -3  -6   42.76    8.15
  -5  -3  -6  820.30   24.82
  -4  -3  -6    0.79   17.70
  -3  -3  -6   59.67    7.83
  -2  -3  -6    4.57   17.13
  -1  -3  -6   12.02   17.34
   0  -3  -6  262.71   19.02
   1  -3  -6    4.95    8.28
   2  -3  -6  124.84   10.30
   3  -3  -6  445.34   22.49
   4  -3  -6   45.58    9.16
   5  -3  -6  197.26   16.85
   6  -3  -6  240.15   19.69
   7  -3  -6  102.28   12.70
   8  -3  -6   13.71   29.12
   9  -3  -6  -13.46   30.62
  10  -3  -6   27.00   31.90
  11  -3  -6   46.63   31.99
  12  -3  -6   49.14   36.94
 -16  -3  -7  -52.78   36.51
 -15  -3  -7   21.57   33.38
 -14  -3  -7   58.05   14.39
 -13  -3  -7   30.07   30.09
 -12  -3  -7   37.84   13.07
 -11  -3  -7  -31.01   29.18
 -10  -3  -7   94.09   12.13
  -9  -3  -7   74.73   10.83
  -8  -3  -7   13.21   21.12
  -7  -3  -7  858.70   27.20
  -6  -3  -7  -17.04   19.09
  -5  -3  -7  206.85   19.99
  -4  -3  -7 1724.19   30.00
  -3  -3  -7 1337.13   26.94
  -2  -3  -7   63.76    7.86
  -1  -3  -7   44.94    7.68
   0  -3  -7   -8.81   17.28
   1  -3  -7  358.47   20.86
   2  -3  -7   26.67   18.58
   3  -3  -7  -19.43   21.31
   4  -3  -7  266.90   22.85
   5  -3  -7   10.12   22.26
   6  -3  -7   18.76   18.38
   7  -3  -7   88.40   12.99
   8  -3  -7   66.28   13.22
   9  -3  -7   58.77   13.81
  10  -3  -7    1.82   31.12
  11  -3  -7   -9.76   33.42
 -16  -3  -8   38.38   33.85
 -15  -3  -8  -22.05   32.94
 -14  -3  -8   46.67   32.45
 -13  -3  -8    5.85   31.46
 -12  -3  -8   37.65   30.07
 -11  -3  -8   15.17   27.40
 -10  -3  -8    2.57   18.42
  -9  -3  -8   17.01   12.01
  -8  -3  -8    6.98   15.49
  -7  -3  -8   16.59   21.01
  -6  -3  -8  -22.99   20.62
  -5  -3  -8   36.06    8.54
  -4  -3  -8  740.88   24.60
  -3  -3  -8   53.20    8.30
  -2  -3  -8   93.18    8.39
  -1  -3  -8  289.90   20.77
   0  -3  -8    4.21   12.83
   1  -3  -8  355.15   22.61
   2  -3  -8  127.54   11.95
   3  -3  -8    4.26   20.49
   4  -3  -8   23.68   22.18
   5  -3  -8   55.36   11.05
   6  -3  -8   56.71   12.23
   7  -3  -8   19.58   27.48
   8  -3  -8  -10.41   30.63
   9  -3  -8   17.27   30.49
  10  -3  -8   20.99   33.97
 -16  -3  -9  -17.95   35.83
 -15  -3  -9   -6.35   34.04
 -14  -3  -9  -20.45   31.62
 -13  -3  -9   23.03   29.91
 -12  -3  -9   40.05   29.55
 -11  -3  -9   34.95   29.13
 -10  -3  -9   16.03   26.89
  -9  -3  -9   -2.97   26.32
  -8  -3  -9  297.13   25.01
  -7  -3  -9  325.76   25.70
  -6  -3  -9  866.44   28.61
  -5  -3  -9   12.46   19.62
  -4  -3  -9    2.57   20.07
  -3  -3  -9   89.47    9.09
  -2  -3  -9  105.23    9.28
  -1  -3  -9  459.82   23.23
   0  -3  -9  146.08   14.60
   1  -3  -9   72.83    9.33
   2  -3  -9   13.38   10.72
   3  -3  -9  228.21   18.57
   4  -3  -9  104.85   11.77
   5  -3  -9   50.45   12.04
   6  -3  -9   60.35   12.49
   7  -3  -9   28.33   27.37
   8  -3  -9   99.80   14.60
   9  -3  -9   -6.76   32.50
  10  -3  -9  -26.94   35.04
 -16  -3 -10   29.23   14.55
 -15  -3 -10    0.35   33.55
 -14  -3 -10  -50.70   32.75
 -13  -3 -10   74.01   13.68
 -12  -3 -10    7.08   30.17
 -11  -3 -10   94.79   13.36
 -10  -3 -10   31.40   26.98
  -9  -3 -10   68.37   12.10
  -8  -3 -10   97.09   11.89
  -7  -3 -10   85.61   11.09
  -6  -3 -10  102.69   10.66
  -5  -3 -10   55.76   10.16
  -4  -3 -10  193.61   16.49
  -3  -3 -10  108.52   10.16
  -2  -3 -10   -2.99   14.42
  -1  -3 -10    3.32   20.82
   0  -3 -10   32.13    9.69
   1  -3 -10   25.13    9.94
   2  -3 -10  205.41   17.95
   3  -3 -10  -73.56   26.30
   4  -3 -10   67.22   12.00
   5  -3 -10   34.72   12.26
   6  -3 -10   42.68   28.99
   7  -3 -10   35.65   28.84
   8  -3 -10  -20.94   32.29
   9  -3 -10   32.97   34.10
 -16  -3 -11   21.09   34.84
 -15  -3 -11   15.49   33.16
 -14  -3 -11    9.57   31.58
 -13  -3 -11   18.90   30.28
 -12  -3 -11   39.13   13.67
 -11  -3 -11   15.94   29.21
 -10  -3 -11   22.20   20.45
  -9  -3 -11   39.56   28.72
  -8  -3 -11    0.60   26.72
  -7  -3 -11  462.78   30.53
  -6  -3 -11   22.05   23.35
  -5  -3 -11   27.46   24.69
  -4  -3 -11   85.56   11.17
  -3  -3 -11   61.91   10.42
  -2  -3 -11  109.28   11.26
  -1  -3 -11   74.21   10.63
   0  -3 -11  146.24   14.47
   1  -3 -11   -3.85   24.29
   2  -3 -11   98.94   11.68
   3  -3 -11   76.97   12.07
   4  -3 -11   24.04   27.75
   5  -3 -11  131.97   12.98
   6  -3 -11  -19.16   29.56
   7  -3 -11   44.64   31.07
   8  -3 -11   20.32   30.37
 -15  -3 -12  -52.73   35.89
 -14  -3 -12    8.48   32.19
 -13  -3 -12  -23.35   31.66
 -12  -3 -12   75.44   14.08
 -11  -3 -12   -6.78   29.88
 -10  -3 -12   12.78   28.95
  -9  -3 -12  221.25   21.32
  -8  -3 -12   27.69   19.81
  -7  -3 -12   90.26   12.04
  -6  -3 -12  122.86   12.20
  -5  -3 -12  664.30   33.83
  -4  -3 -12  -31.00   26.46
  -3  -3 -12   35.65   25.75
  -2  -3 -12  281.04   20.25
  -1  -3 -12    6.03   25.84
   0  -3 -12  161.34   15.60
   1  -3 -12    2.54   26.26
   2  -3 -12    9.22   27.27
   3  -3 -12   21.57   26.72
   4  -3 -12   24.81   26.58
   5  -3 -12  -17.14   30.05
   6  -3 -12    8.30   31.25
   7  -3 -12   -1.04   32.26
 -15  -3 -13  -57.02   35.76
 -14  -3 -13   40.73   32.17
 -13  -3 -13  -17.87   32.62
 -12  -3 -13   -5.27   31.36
 -11  -3 -13   31.38   28.96
 -10  -3 -13   66.97   13.64
  -9  -3 -13   -2.20   29.37
  -8  -3 -13  -16.48   27.80
  -7  -3 -13   -8.31   27.56
  -6  -3 -13   81.79   12.53
  -5  -3 -13  122.94   12.36
  -4  -3 -13   -2.58   26.48
  -3  -3 -13  164.97   16.11
  -2  -3 -13  -11.02   27.47
  -1  -3 -13   -7.48   26.93
   0  -3 -13  239.33   20.58
   1  -3 -13  -20.22   29.20
   2  -3 -13   19.38   26.49
   3  -3 -13   40.34   12.35
   4  -3 -13   43.22   13.02
   5  -3 -13   26.44   30.49
   6  -3 -13   43.79   14.11
   7  -3 -13    4.21   32.92
 -15  -3 -14   26.78   23.63
 -14  -3 -14   37.53   33.80
 -13  -3 -14   10.17   32.29
 -12  -3 -14   15.24   31.97
 -11  -3 -14    6.03   31.84
 -10  -3 -14  115.02   14.55
  -9  -3 -14   20.74   13.51
  -8  -3 -14   16.01   29.68
  -7  -3 -14   -3.57   28.45
  -6  -3 -14  -25.29   28.50
  -5  -3 -14   42.95   12.87
  -4  -3 -14   73.46   12.89
  -3  -3 -14   23.22   26.97
  -2  -3 -14   18.67   27.86
  -1  -3 -14  484.91   33.29
   0  -3 -14  267.30   23.63
   1  -3 -14   69.13   13.74
   2  -3 -14   17.37   27.96
   3  -3 -14   39.18   13.41
   4  -3 -14   22.65   28.95
   5  -3 -14   42.82   28.84
   6  -3 -14  115.54   15.14
 -14  -3 -15  -30.95   34.68
 -13  -3 -15   87.37   14.85
 -12  -3 -15  -57.16   34.61
 -11  -3 -15   -0.22   31.54
 -10  -3 -15   78.67   14.97
  -9  -3 -15   33.32   31.65
  -8  -3 -15   33.36   31.34
  -7  -3 -15  -30.81   32.49
  -6  -3 -15   83.11   14.03
  -5  -3 -15  -12.50   29.71
  -4  -3 -15   20.65   29.02
  -3  -3 -15   -9.43   29.69
  -2  -3 -15   62.97   13.52
  -1  -3 -15  -44.38   31.17
   0  -3 -15   -3.02   22.23
   1  -3 -15    1.86   31.74
   2  -3 -15   35.00   28.70
   3  -3 -15   19.38   13.88
   4  -3 -15   38.88   29.54
 -13  -3 -16  -17.18   34.47
 -12  -3 -16   24.25   21.96
 -11  -3 -16    7.02   31.82
 -10  -3 -16  -29.95   33.87
  -9  -3 -16  101.87   14.73
  -8  -3 -16  -25.86   32.44
  -7  -3 -16   32.55   30.63
  -6  -3 -16    4.90   30.79
  -5  -3 -16  -20.87   31.20
  -4  -3 -16    3.65   31.18
  -3  -3 -16  -20.62   30.31
  -2  -3 -16   58.97   14.57
  -1  -3 -16  -49.64   32.64
   0  -3 -16   52.06   13.88
   1  -3 -16   13.42   21.73
   2  -3 -16   20.94   31.89
   3  -3 -16   31.07   14.43
 -12  -3 -17  -19.51   34.53
 -11  -3 -17   51.77   15.22
 -10  -3 -17   82.11   15.18
  -9  -3 -17   73.12   15.17
  -8  -3 -17   -5.70   33.08
  -7  -3 -17   80.57   14.27
  -6  -3 -17   -5.36   22.04
  -5  -3 -17    5.22   31.48
  -4  -3 -17  -10.40   31.50
  -3  -3 -17  -28.02   31.72
  -2  -3 -17   -9.88   32.82
  -1  -3 -17   22.02   33.02
   0  -3 -17   77.09   14.60
   1  -3 -17   33.04   32.91
   2  -3 -17   30.84   34.94
 -11  -3 -18   40.99   33.67
 -10  -3 -18  -23.55   35.82
  -9  -3 -18    1.95   33.24
  -8  -3 -18   20.13   32.47
  -7  -3 -18  -53.77   34.14
  -6  -3 -18   42.21   31.73
  -5  -3 -18  -28.22   33.13
  -4  -3 -18    8.89   32.67
  -3  -3 -18  -10.03   34.14
  -2  -3 -18   -8.04   34.19
  -1  -3 -18  104.94   15.57
   0  -3 -18   -1.49   33.69
  -9  -3 -19  -18.97   36.71
  -8  -3 -19   36.93   31.94
  -7  -3 -19   -5.82   34.22
  -6  -3 -19  -41.20   34.47
  -5  -3 -19   15.66   32.80
  -4  -3 -19   21.58   23.59
  -3  -3 -19   76.81   14.95
  -2  -3 -19   15.14   32.73
   4  -4  19  -26.89   37.08
   5  -4  19   16.74   34.72
   0  -4  18   23.50   37.48
   1  -4  18  -11.37   36.93
   2  -4  18  -54.24   35.74
   3  -4  18  -39.49   33.85
   4  -4  18   16.54   33.53
   5  -4  18    7.68   23.84
   6  -4  18  -16.95   34.14
   7  -4  18  -24.57   33.75
   8  -4  18  -13.48   33.60
   9  -4  18  -37.39   36.03
  -2  -4  17   27.06   24.11
  -1  -4  17    6.38   35.14
   0  -4  17    9.68   32.99
   1  -4  17   83.12   15.12
   2  -4  17   85.90   14.85
   3  -4  17   25.63   32.80
   4  -4  17    1.43   30.36
   5  -4  17   31.81   31.87
   6  -4  17   31.71   31.83
   7  -4  17   47.41   14.12
   8  -4  17   20.93   15.00
   9  -4  17    1.75   33.67
  10  -4  17   -6.66   33.76
  -3  -4  16   34.93   32.99
  -2  -4  16    7.01   34.93
  -1  -4  16   24.93   23.02
   0  -4  16  -42.90   33.26
   1  -4  16  -34.15   33.90
   2  -4  16   29.18   19.57
   3  -4  16   20.96   31.80
   4  -4  16    2.63   30.94
   5  -4  16   41.88   29.28
   6  -4  16   26.83   31.59
   7  -4  16  -15.51   32.82
   8  -4  16   36.99   32.53
   9  -4  16    3.77   31.94
  10  -4  16  -14.87   32.61
  11  -4  16   -4.38   32.64
  -5  -4  15   15.96   34.59
  -4  -4  15   28.64   33.91
  -3  -4  15   26.81   23.95
  -2  -4  15   40.54   13.94
  -1  -4  15   -0.60   30.97
   0  -4  15   93.53   14.82
   1  -4  15  138.35   15.24
   2  -4  15   44.75   32.36
   3  -4  15   14.18   30.59
   4  -4  15  171.70   16.22
   5  -4  15  -29.64   31.47
   6  -4  15  125.58   14.30
   7  -4  15   24.31   21.95
   8  -4  15    3.99   31.78
   9  -4  15   23.93   31.35
  10  -4  15    2.99   33.79
  11  -4  15   37.29   30.01
  12  -4  15  -15.02   34.43
  -6  -4  14    7.21   32.41
  -5  -4  14   86.60   14.22
  -4  -4  14  120.13   14.46
  -3  -4  14   33.95   32.36
  -2  -4  14  -60.16   32.98
  -1  -4  14   49.21   13.77
   0  -4  14   72.03   14.21
   1  -4  14  346.48   24.17
   2  -4  14  -10.17   32.16
   3  -4  14  -36.95   31.23
   4  -4  14   37.35   29.83
   5  -4  14   43.71   30.60
   6  -4  14  -30.46   30.46
   7  -4  14   25.32   29.86
   8  -4  14   24.63   13.78
   9  -4  14   46.13   13.61
  10  -4  14   79.29   14.35
  11  -4  14  -13.09   32.38
  12  -4  14   -6.01   32.79
  13  -4  14    6.53   31.94
  -7  -4  13   17.06   31.78
  -6  -4  13  -26.44   31.13
  -5  -4  13    2.48   30.98
  -4  -4  13   43.76   32.24
  -3  -4  13   42.28   30.60
  -2  -4  13   34.68   29.58
  -1  -4  13   25.68   30.20
   0  -4  13  -52.50   30.52
   1  -4  13  -32.21   31.50
   2  -4  13   -5.04   30.49
   3  -4  13    3.41   27.64
   4  -4  13    2.34   27.65
   5  -4  13   92.12   13.39
   6  -4  13   37.18   28.56
   7  -4  13  252.75   23.51
   8  -4  13   30.95   13.77
   9  -4  13   36.25   31.08
  10  -4  13   54.70   13.75
  11  -4  13  -14.10   32.05
  12  -4  13   55.42   14.27
  13  -4  13  -61.82   35.34
  -8  -4  12  -34.15   34.27
  -7  -4  12   13.24   31.20
  -6  -4  12    8.86   28.77
  -5  -4  12  -28.80   31.64
  -4  -4  12   94.22   13.50
  -3  -4  12  238.70   22.38
  -2  -4  12  -21.49   28.82
  -1  -4  12  -20.09   28.65
   0  -4  12  503.54   34.53
   1  -4  12   33.76   28.43
   2  -4  12   58.12   12.21
   3  -4  12  360.38   32.10
   4  -4  12   30.99   12.02
   5  -4  12   34.24   11.89
   6  -4  12  171.15   17.08
   7  -4  12   43.25   29.38
   8  -4  12  119.64   13.25
   9  -4  12   51.88   13.20
  10  -4  12    7.69   21.07
  11  -4  12  -30.46   31.49
  12  -4  12    6.10   32.44
  13  -4  12   32.31   33.62
  14  -4  12   -1.11   34.04
  -9  -4  11   32.30   33.13
  -8  -4  11  -29.47   33.08
  -7  -4  11  -30.64   30.26
  -6  -4  11   19.19   20.20
  -5  -4  11   77.16   13.40
  -4  -4  11  -35.71   30.41
  -3  -4  11   93.54   12.72
  -2  -4  11  101.96   12.61
  -1  -4  11   97.13   12.57
   0  -4  11   73.75   12.45
   1  -4  11  294.17   28.64
   2  -4  11   97.09   11.73
   3  -4  11  -36.76   26.58
   4  -4  11   21.47   25.10
   5  -4  11  -13.25   27.35
   6  -4  11   -4.22   27.28
   7  -4  11   71.59   12.57
   8  -4  11    7.40   29.24
   9  -4  11   23.47   30.46
  10  -4  11   90.11   13.76
  11  -4  11   -5.79   31.36
  12  -4  11   40.22   29.50
  13  -4  11   37.62   14.82
  14  -4  11  -11.24   33.85
 -10  -4  10   28.75   33.70
  -9  -4  10    2.48   22.52
  -8  -4  10  -19.38   32.00
  -7  -4  10   31.17   28.13
  -6  -4  10   59.29   13.56
  -5  -4  10   38.17   26.91
  -4  -4  10   13.88   27.66
  -3  -4  10   85.34   12.15
  -2  -4  10   10.88   25.97
  -1  -4  10    1.76   25.28
   0  -4  10  160.60   14.56
   1  -4  10   18.44   23.07
   2  -4  10  651.07   29.66
   3  -4  10  -18.07   23.44
   4  -4  10  110.24   11.03
   5  -4  10   53.21   11.18
   6  -4  10   12.04   25.09
   7  -4  10  249.01   20.93
   8  -4  10  355.54   31.18
   9  -4  10    3.20   29.06
  10  -4  10   16.66   29.01
  11  -4  10  203.94   18.91
  12  -4  10    9.93   31.54
  13  -4  10   27.08   31.01
  14  -4  10   54.60   15.55
 -10  -4   9    0.59   35.99
  -9  -4   9   26.77   21.79
  -8  -4   9   23.96   21.99
  -7  -4   9    0.04   30.13
  -6  -4   9   -2.81   27.42
  -5  -4   9  109.10   12.36
  -4  -4   9  123.23   11.95
  -3  -4   9  -11.00   24.69
  -2  -4   9  -16.27   24.18
  -1  -4   9  357.44   26.08
   0  -4   9  -23.05   22.46
   1  -4   9   16.40   21.72
   2  -4   9  633.04   27.19
   3  -4   9   14.48   20.92
   4  -4   9   -7.56   21.90
   5  -4   9    4.07   22.33
   6  -4   9  217.88   17.99
   7  -4   9   -9.22   26.54
   8  -4   9  114.39   12.63
   9  -4   9   39.07   27.91
  10  -4   9  -82.94   31.16
  11  -4   9   21.79   29.74
  12  -4   9    1.99   29.64
  13  -4   9  -29.90   31.90
  14  -4   9   15.91   33.35
 -11  -4   8   12.90   34.68
 -10  -4   8  -74.79   32.53
  -9  -4   8  -40.04   31.95
  -8  -4   8   82.60   13.93
  -7  -4   8   46.94   12.76
  -6  -4   8   24.64   25.02
  -5  -4   8   43.18   10.94
  -4  -4   8  -13.84   23.14
  -3  -4   8    8.21   22.24
  -2  -4   8  355.45   22.83
  -1  -4   8   72.47    9.52
   0  -4   8  101.13    9.09
   1  -4   8  231.66   21.24
   2  -4   8   69.65    9.12
   3  -4   8  166.55   14.61
   4  -4   8   11.27   14.06
   5  -4   8  210.91   15.93
   6  -4   8   12.27   22.31
   7  -4   8   49.17   10.96
   8  -4   8   44.35   11.72
   9  -4   8  292.22   20.46
  10  -4   8   92.67   13.51
  11  -4   8    5.15   28.94
  12  -4   8   58.28   14.06
  13  -4   8    6.77   32.58
  14  -4   8   -9.35   32.01
  15  -4   8   42.05   35.85
 -12  -4   7  -94.80   38.02
 -11  -4   7   14.24   16.35
 -10  -4   7   -7.14   32.36
  -9  -4   7   19.74   32.11
  -8  -4   7   32.20   28.49
  -7  -4   7  -15.28   28.91
  -6  -4   7  179.16   15.32
  -5  -4   7   69.94   10.81
  -4  -4   7  116.16   11.51
  -3  -4   7  196.39   15.78
  -2  -4   7  433.76   23.84
  -1  -4   7   -8.05   19.30
   0  -4   7   25.69   18.13
   1  -4   7  200.48   19.38
   2  -4   7   29.56    8.25
   3  -4   7  153.33   14.05
   4  -4   7   22.72    8.84
   5  -4   7   52.06    9.12
   6  -4   7   14.89   20.86
   7  -4   7  531.66   27.24
   8  -4   7  118.05   11.78
   9  -4   7   23.49   27.02
  10  -4   7  134.78   13.35
  11  -4   7    1.51   29.90
  12  -4   7  -26.55   31.71
  13  -4   7   28.96   13.82
  14  -4   7   27.26   32.15
  15  -4   7  -25.47   35.59
 -12  -4   6   44.95   33.46
 -11  -4   6   80.27   14.62
 -10  -4   6   14.11   31.73
  -9  -4   6   22.77   32.69
  -8  -4   6    7.85   28.34
  -7  -4   6   20.46   11.97
  -6  -4   6   98.58   11.09
  -5  -4   6   58.81    9.96
  -4  -4   6  796.24   28.36
  -3  -4   6  -20.71   20.06
  -2  -4   6   94.05    8.53
  -1  -4   6 1416.43   28.82
   0  -4   6   53.97    7.99
   1  -4   6  177.60   13.79
   2  -4   6  -10.82   18.49
   3  -4   6  195.96   18.99
   4  -4   6   28.56    8.36
   5  -4   6  113.26   11.29
   6  -4   6  -16.23   20.77
   7  -4   6    5.01   22.98
   8  -4   6  -15.74   25.01
   9  -4   6   39.33   27.10
  10  -4   6   20.14   27.84
  11  -4   6   42.12   29.85
  12  -4   6    3.26   29.96
  13  -4   6   35.03   13.56
  14  -4   6  -20.74   31.78
  15  -4   6   42.44   33.57
 -13  -4   5   45.78   36.56
 -12  -4   5   -9.72   35.39
 -11  -4   5   -6.79   32.20
 -10  -4   5    1.96   30.61
  -9  -4   5  -28.29   29.86
  -8  -4   5  219.92   17.16
  -7  -4   5   20.98   14.26
  -6  -4   5   21.03   24.84
  -5  -4   5   14.37   21.39
  -4  -4   5  706.53   26.67
  -3  -4   5   23.19    8.20
  -2  -4   5 1928.45   30.33
  -1  -4   5  290.48   20.15
   0  -4   5  195.52   13.65
   1  -4   5   64.34    7.82
   2  -4   5   31.30    7.84
   3  -4   5   78.44    8.05
   4  -4   5  268.77   20.44
   5  -4   5   98.06    9.75
   6  -4   5  236.09   22.25
   7  -4   5  411.06   25.32
   8  -4   5  124.65   12.43
   9  -4   5  227.27   20.45
  10  -4   5   55.77   12.70
  11  -4   5   37.56   28.24
  12  -4   5   67.59   13.77
  13  -4   5   29.13   31.80
  14  -4   5   -6.47   33.72
 -13  -4   4   83.01   15.44
 -12  -4   4    5.22   31.99
 -11  -4   4   30.81   13.85
 -10  -4   4   24.74   13.56
  -9  -4   4   22.27   27.52
  -8  -4   4   66.61   11.93
  -7  -4   4  -30.35   24.83
  -6  -4   4 1319.06   32.99
  -5  -4   4   -4.49   19.23
  -4  -4   4 1101.60   26.82
  -3  -4   4 3091.16   36.38
  -2  -4   4  369.22   20.03
  -1  -4   4  180.04   17.61
   0  -4   4  -11.87   16.67
   1  -4   4   22.33    7.54
   2  -4   4  480.50   20.64
   3  -4   4   12.83   17.68
   4  -4   4   85.56    8.22
   5  -4   4   77.97    8.41
   6  -4   4   28.18   18.82
   7  -4   4   83.07    9.89
   8  -4   4   86.95   11.41
   9  -4   4  -16.98   26.89
  10  -4   4   -2.96   28.01
  11  -4   4   27.18   29.42
  12  -4   4   27.93   29.38
  13  -4   4   24.37   31.51
  14  -4   4   34.83   15.29
 -14  -4   3  -57.96   36.89
 -13  -4   3  -20.73   34.40
 -12  -4   3  -29.59   32.51
 -11  -4   3   26.82   13.38
 -10  -4   3   43.79   13.16
  -9  -4   3    9.78   27.43
  -8  -4   3  -47.00   26.49
  -7  -4   3  900.42   31.74
  -6  -4   3  392.64   25.40
  -5  -4   3  760.02   25.73
  -4  -4   3  264.59   19.69
  -3  -4   3  480.15   20.92
  -2  -4   3  129.31   12.07
  -1  -4   3 1143.21   23.60
   0  -4   3 1521.52   24.35
   1  -4   3  372.50   17.91
   2  -4   3  225.28   18.04
   3  -4   3  344.05   20.00
   4  -4   3  503.60   21.42
   5  -4   3   -4.02   18.58
   6  -4   3    4.30   20.53
   7  -4   3  587.94   27.60
   8  -4   3  153.57   14.58
   9  -4   3  158.66   14.06
  10  -4   3  149.36   13.20
  11  -4   3   10.11   29.47
  12  -4   3   74.23   14.09
  13  -4   3  192.77   17.18
  14  -4   3  -47.15   35.21
 -14  -4   2  -13.22   34.17
 -13  -4   2   -1.99   33.01
 -12  -4   2  -17.97   31.54
 -11  -4   2   17.94   28.95
 -10  -4   2    5.68   27.69
  -9  -4   2  153.61   13.92
  -8  -4   2   36.08   10.70
  -7  -4   2  242.34   22.94
  -6  -4   2 2165.11   35.65
  -5  -4   2  -18.96   18.33
  -4  -4   2  270.57   19.53
  -3  -4   2  507.82   19.99
  -2  -4   2  460.77   19.19
  -1  -4   2  226.23   16.57
   0  -4   2   20.68   14.37
   1  -4   2  167.27   11.31
   2  -4   2 1333.43   23.97
   3  -4   2  189.62   18.62
   4  -4   2  186.20   14.33
   5  -4   2 2233.50   33.95
   6  -4   2  232.20   21.18
   7  -4   2   47.23    9.95
   8  -4   2  411.95   28.17
   9  -4   2   14.85   27.42
  10  -4   2   21.87   27.80
  11  -4   2   28.60   31.72
  12  -4   2    3.96   32.71
  13  -4   2   -1.32   31.85
  14  -4   2    9.03   22.84
 -15  -4   1   50.27   35.32
 -14  -4   1   26.97   34.07
 -13  -4   1   39.11   32.65
 -12  -4   1   26.32   31.27
 -11  -4   1  142.83   13.71
 -10  -4   1   14.38   19.41
  -9  -4   1   47.31   11.58
  -8  -4   1  277.48   24.91
  -7  -4   1   29.86   20.41
  -6  -4   1  -25.50   19.15
  -5  -4   1   43.38    7.82
  -4  -4   1  972.71   23.48
  -3  -4   1  163.76   12.07
  -2  -4   1   42.44    6.69
  -1  -4   1   19.83   13.70
   0  -4   1  997.64   18.84
   1  -4   1   58.38    6.72
   2  -4   1   -2.37   16.47
   3  -4   1  386.85   20.57
   4  -4   1 1255.67   26.84
   5  -4   1   76.81    8.56
   6  -4   1  147.66   14.61
   7  -4   1   19.46   22.01
   8  -4   1   28.06   10.98
   9  -4   1  125.22   12.45
  10  -4   1   87.14   13.57
  11  -4   1  109.18   14.24
  12  -4   1   26.98   31.33
  13  -4   1  -30.40   32.56
  14  -4   1    5.11   33.44
 -15  -4   0  -31.88   37.42
 -14  -4   0   58.09   14.90
 -13  -4   0  -17.37   32.90
 -12  -4   0   20.34   29.50
 -11  -4   0  -16.16   29.09
 -10  -4   0   50.96   12.43
  -9  -4   0   -1.30   24.79
  -8  -4   0   10.73   21.33
  -7  -4   0    9.14   19.87
  -6  -4   0   -9.45   18.26
  -5  -4   0  789.96   24.16
  -4  -4   0   35.77    7.56
  -3  -4   0   -3.37   15.58
  -2  -4   0  244.94   15.31
  -1  -4   0  163.95   13.91
   0  -4   0   74.59    6.77
   1  -4   0  197.00   15.94
   2  -4   0 1538.90   25.00
   3  -4   0  303.94   19.63
   4  -4   0  286.20   19.84
   5  -4   0  273.49   21.18
   6  -4   0  732.96   26.95
   7  -4   0  117.19   11.72
   8  -4   0   -5.13   25.65
   9  -4   0  129.17   12.96
  10  -4   0   25.48   28.25
  11  -4   0   36.58   29.65
  12  -4   0   32.66   29.62
  13  -4   0   37.50   32.63
  14  -4   0   -6.42   35.79
 -15  -4  -1   51.13   15.39
 -14  -4  -1  -54.28   34.48
 -13  -4  -1  -35.26   33.39
 -12  -4  -1   93.30   14.24
 -11  -4  -1   15.96   28.60
 -10  -4  -1   59.12   11.92
  -9  -4  -1    1.22   23.61
  -8  -4  -1  320.66   24.08
  -7  -4  -1  633.32   24.82
  -6  -4  -1   35.19    8.14
  -5  -4  -1   78.84    8.02
  -4  -4  -1   24.41    7.35
  -3  -4  -1   -7.11   14.90
  -2  -4  -1    9.46    7.79
  -1  -4  -1  135.63    9.44
   0  -4  -1  309.08   15.37
   1  -4  -1  246.88   15.75
   2  -4  -1  665.01   20.79
   3  -4  -1  135.00   13.00
   4  -4  -1 2054.97   31.50
   5  -4  -1   76.34    8.56
   6  -4  -1   20.93   20.10
   7  -4  -1   46.69   10.34
   8  -4  -1   57.64   11.81
   9  -4  -1  -35.58   28.17
  10  -4  -1    8.06   29.54
  11  -4  -1    5.10   30.83
  12  -4  -1  128.56   14.67
  13  -4  -1  -33.15   34.02
 -15  -4  -2    2.20   35.41
 -14  -4  -2   10.37   31.54
 -13  -4  -2    7.43   31.01
 -12  -4  -2   78.34   13.94
 -11  -4  -2   -4.62   29.38
 -10  -4  -2   16.75   26.59
  -9  -4  -2  -53.80   24.71
  -8  -4  -2   71.92    9.64
  -7  -4  -2   18.51   19.34
  -6  -4  -2  262.04   20.71
  -5  -4  -2    7.55   17.09
  -4  -4  -2  -10.06   16.79
  -3  -4  -2   22.01    6.76
  -2  -4  -2  504.70   17.25
  -1  -4  -2   35.48    6.18
   0  -4  -2   63.97    6.64
   1  -4  -2  605.33   19.30
   2  -4  -2   15.83   16.52
   3  -4  -2  144.00   12.48
   4  -4  -2  141.93   13.57
   5  -4  -2  667.48   24.39
   6  -4  -2   72.76   10.15
   7  -4  -2   13.94   24.19
   8  -4  -2   50.10   11.75
   9  -4  -2  -34.09   28.40
  10  -4  -2  -39.60   31.53
  11  -4  -2   85.98   14.17
  12  -4  -2   15.27   31.00
  13  -4  -2   28.12   31.63
 -16  -4  -3  -35.70   35.35
 -15  -4  -3   43.85   32.65
 -14  -4  -3   -9.18   33.14
 -13  -4  -3    2.88   30.99
 -12  -4  -3   -0.50   31.09
 -11  -4  -3   91.28   13.12
 -10  -4  -3  -29.97   25.98
  -9  -4  -3  -14.76   23.35
  -8  -4  -3  302.78   24.11
  -7  -4  -3   -2.32   19.06
  -6  -4  -3   23.68   18.71
  -5  -4  -3   25.65    7.78
  -4  -4  -3  180.84   17.75
  -3  -4  -3   12.49   15.30
  -2  -4  -3  129.76   11.44
  -1  -4  -3  603.17   19.13
   0  -4  -3  110.04    9.08
   1  -4  -3    5.04   16.35
   2  -4  -3  200.75   18.04
   3  -4  -3 1931.69   30.44
   4  -4  -3  102.90    9.51
   5  -4  -3  604.03   25.86
   6  -4  -3  173.71   13.87
   7  -4  -3   40.54   11.31
   8  -4  -3    9.40   26.76
   9  -4  -3   30.65   29.51
  10  -4  -3  -34.29   31.03
  11  -4  -3   10.61   30.72
  12  -4  -3   24.76   32.56
  13  -4  -3  -49.40   35.81
 -16  -4  -4   -4.22   35.22
 -15  -4  -4    5.77   23.36
 -14  -4  -4  -14.26   30.07
 -13  -4  -4   97.60   14.92
 -12  -4  -4   11.18   17.08
 -11  -4  -4    4.53   28.11
 -10  -4  -4   10.66   26.82
  -9  -4  -4   65.43   10.56
  -8  -4  -4   18.81   20.88
  -7  -4  -4   -1.02   18.92
  -6  -4  -4  227.31   20.48
  -5  -4  -4  293.52   19.58
  -4  -4  -4   16.83   16.99
  -3  -4  -4   -3.94   16.70
  -2  -4  -4  130.92   11.62
  -1  -4  -4   59.27    7.11
   0  -4  -4  190.05   12.40
   1  -4  -4  400.96   19.53
   2  -4  -4  194.51   13.27
   3  -4  -4   21.51   17.16
   4  -4  -4   11.41   18.70
   5  -4  -4   38.24    9.65
   6  -4  -4   31.76   22.50
   7  -4  -4   19.76   18.37
   8  -4  -4   70.80   12.84
   9  -4  -4  -26.09   31.96
  10  -4  -4   -0.59   30.23
  11  -4  -4    4.49   32.49
  12  -4  -4   25.82   22.68
 -16  -4  -5   29.83   24.50
 -15  -4  -5   -2.91   32.26
 -14  -4  -5   29.01   32.20
 -13  -4  -5   45.00   30.70
 -12  -4  -5  -16.98   31.56
 -11  -4  -5   14.27   28.17
 -10  -4  -5   14.65   18.13
  -9  -4  -5   97.57   10.95
  -8  -4  -5   17.48   14.26
  -7  -4  -5  378.11   23.08
  -6  -4  -5  137.19   13.41
  -5  -4  -5   94.87    9.21
  -4  -4  -5   99.96    9.09
  -3  -4  -5   31.77    7.50
  -2  -4  -5    9.70   16.31
  -1  -4  -5   99.92    9.88
   0  -4  -5 1106.90   24.14
   1  -4  -5   44.96    7.79
   2  -4  -5  181.32   13.12
   3  -4  -5  457.87   22.80
   4  -4  -5  867.64   28.09
   5  -4  -5   52.61   10.28
   6  -4  -5   17.75   24.05
   7  -4  -5  342.40   30.94
   8  -4  -5   -1.87   27.68
   9  -4  -5   18.05   29.94
  10  -4  -5  -71.92   33.10
  11  -4  -5   19.87   16.20
  12  -4  -5  -18.52   34.82
 -16  -4  -6   27.17   32.49
 -15  -4  -6   12.67   23.17
 -14  -4  -6   30.53   21.63
 -13  -4  -6  -36.73   31.75
 -12  -4  -6  142.37   13.54
 -11  -4  -6   57.71   12.62
 -10  -4  -6  102.38   12.12
  -9  -4  -6  842.68   32.46
  -8  -4  -6  326.81   24.78
  -7  -4  -6   -5.32   20.98
  -6  -4  -6   29.69    8.58
  -5  -4  -6  802.26   24.91
  -4  -4  -6   -6.55   17.46
  -3  -4  -6   51.98    7.81
  -2  -4  -6  -30.55   17.32
  -1  -4  -6  116.98    9.98
   0  -4  -6  -22.88   16.68
   1  -4  -6   19.07   17.20
   2  -4  -6   12.34   17.69
   3  -4  -6  190.40   14.77
   4  -4  -6    9.47   15.08
   5  -4  -6   29.72   10.25
   6  -4  -6   22.88   26.13
   7  -4  -6  -13.82   27.95
   8  -4  -6  -13.33   29.33
   9  -4  -6  -39.61   31.54
  10  -4  -6   66.58   14.04
  11  -4  -6   14.43   18.47
 -16  -4  -7   -4.32   35.29
 -15  -4  -7   13.00   33.37
 -14  -4  -7   66.05   14.31
 -13  -4  -7    8.44   30.65
 -12  -4  -7  -29.75   29.22
 -11  -4  -7   22.32   28.31
 -10  -4  -7    9.27   25.86
  -9  -4  -7   23.69   10.87
  -8  -4  -7   70.80   10.34
  -7  -4  -7   -9.46   20.24
  -6  -4  -7  292.45   21.67
  -5  -4  -7   17.17   18.32
  -4  -4  -7   67.18    8.42
  -3  -4  -7  253.69   19.47
  -2  -4  -7  808.80   23.99
  -1  -4  -7  212.24   13.81
   0  -4  -7  478.69   22.17
   1  -4  -7  480.21   22.98
   2  -4  -7   -9.79   18.90
   3  -4  -7  412.56   25.87
   4  -4  -7  -15.76   22.60
   5  -4  -7   37.66   11.00
   6  -4  -7   50.19   11.69
   7  -4  -7   49.51   12.51
   8  -4  -7   29.03   13.31
   9  -4  -7   11.43   29.38
  10  -4  -7    8.88   32.69
  11  -4  -7  -83.56   35.72
 -16  -4  -8  -56.32   34.20
 -15  -4  -8    8.45   32.13
 -14  -4  -8    2.64   31.87
 -13  -4  -8   46.42   13.83
 -12  -4  -8   10.14   29.90
 -11  -4  -8   29.57   28.02
 -10  -4  -8   61.23   11.78
  -9  -4  -8   79.47   11.58
  -8  -4  -8  196.55   17.75
  -7  -4  -8    6.17   21.77
  -6  -4  -8  260.88   22.45
  -5  -4  -8  508.94   23.36
  -4  -4  -8  870.19   25.66
  -3  -4  -8  256.40   22.19
  -2  -4  -8   45.70    8.49
  -1  -4  -8  160.50   14.28
   0  -4  -8   17.33   13.14
   1  -4  -8  127.38   12.17
   2  -4  -8  211.56   16.49
   3  -4  -8   82.84   10.53
   4  -4  -8   38.03   25.62
   5  -4  -8   51.62   11.83
   6  -4  -8  117.68   12.69
   7  -4  -8   21.28   19.56
   8  -4  -8   -2.48   29.03
   9  -4  -8   27.91   30.71
  10  -4  -8    3.06   35.08
 -16  -4  -9  -10.16   34.01
 -15  -4  -9    8.44   33.04
 -14  -4  -9  -39.22   32.52
 -13  -4  -9  -29.99   32.30
 -12  -4  -9    5.13   29.57
 -11  -4  -9   53.36   13.15
 -10  -4  -9   35.84   26.19
  -9  -4  -9   93.01   11.90
  -8  -4  -9  281.26   26.64
  -7  -4  -9  249.86   24.38
  -6  -4  -9  327.23   24.40
  -5  -4  -9   25.76    9.26
  -4  -4  -9  103.73    9.57
  -3  -4  -9  674.32   26.59
  -2  -4  -9   84.22    9.15
  -1  -4  -9    1.16   19.67
   0  -4  -9  542.97   27.07
   1  -4  -9  -26.85   21.86
   2  -4  -9   87.43   10.36
   3  -4  -9   10.31   23.83
   4  -4  -9   22.55   11.25
   5  -4  -9   18.55   26.44
   6  -4  -9    1.36   27.84
   7  -4  -9   -8.73   27.74
   8  -4  -9   18.22   13.63
   9  -4  -9   18.16   22.26
 -16  -4 -10   17.04   33.86
 -15  -4 -10    4.02   33.60
 -14  -4 -10   72.17   14.12
 -13  -4 -10   -3.76   31.07
 -12  -4 -10   38.64   28.02
 -11  -4 -10   14.03   29.89
 -10  -4 -10   -6.53   27.52
  -9  -4 -10   56.55   12.32
  -8  -4 -10   94.22   11.91
  -7  -4 -10   19.61   23.62
  -6  -4 -10   -4.19   23.67
  -5  -4 -10  189.94   17.61
  -4  -4 -10   21.26    9.63
  -3  -4 -10   19.63   22.18
  -2  -4 -10  458.64   26.51
  -1  -4 -10   51.75   10.16
   0  -4 -10   12.51   13.34
   1  -4 -10   22.04   23.43
   2  -4 -10  327.19   28.29
   3  -4 -10   58.33   11.91
   4  -4 -10  100.95   12.24
   5  -4 -10   78.61   12.39
   6  -4 -10   23.58   29.32
   7  -4 -10  -20.75   29.66
   8  -4 -10   25.69   31.86
   9  -4 -10   51.64   14.95
 -16  -4 -11  -14.36   35.55
 -15  -4 -11    5.12   32.90
 -14  -4 -11   -3.15   31.47
 -13  -4 -11  -48.07   32.11
 -12  -4 -11   20.10   30.39
 -11  -4 -11   53.68   13.76
 -10  -4 -11  119.46   13.38
  -9  -4 -11  -54.88   29.08
  -8  -4 -11  153.32   14.15
  -7  -4 -11  320.40   29.22
  -6  -4 -11   22.25   25.88
  -5  -4 -11   32.02   26.09
  -4  -4 -11  286.63   18.99
  -3  -4 -11  466.86   28.75
  -2  -4 -11   22.05   16.77
  -1  -4 -11   41.92   10.84
   0  -4 -11   85.64   11.18
   1  -4 -11    6.92   26.45
   2  -4 -11   42.40   11.81
   3  -4 -11   63.02   12.10
   4  -4 -11   -0.09   27.12
   5  -4 -11   59.52   12.70
   6  -4 -11    1.42   29.24
   7  -4 -11  -36.78   31.02
   8  -4 -11    8.97   33.69
 -15  -4 -12   21.86   32.32
 -14  -4 -12  -16.55   32.66
 -13  -4 -12   69.85   14.09
 -12  -4 -12  -32.78   30.46
 -11  -4 -12   27.00   30.41
 -10  -4 -12  -11.09   28.67
  -9  -4 -12   42.30   29.19
  -8  -4 -12  -15.04   28.60
  -7  -4 -12   19.72   25.47
  -6  -4 -12    8.86   25.76
  -5  -4 -12  -74.82   27.91
  -4  -4 -12   97.88   11.64
  -3  -4 -12  146.54   13.59
  -2  -4 -12  -34.19   27.50
  -1  -4 -12  278.62   27.83
   0  -4 -12   18.45   25.60
   1  -4 -12  -32.35   26.58
   2  -4 -12  -12.82   27.47
   3  -4 -12   13.84   27.66
   4  -4 -12    9.45   28.45
   5  -4 -12  -18.85   28.17
   6  -4 -12   21.72   15.62
   7  -4 -12   38.26   29.14
 -15  -4 -13    9.35   34.08
 -14  -4 -13   26.56   14.64
 -13  -4 -13  126.33   14.85
 -12  -4 -13   40.15   31.02
 -11  -4 -13   13.29   31.59
 -10  -4 -13   89.26   13.96
  -9  -4 -13   -4.15   28.95
  -8  -4 -13   25.70   26.99
  -7  -4 -13  -18.31   28.56
  -6  -4 -13  189.56   16.59
  -5  -4 -13   27.85   12.20
  -4  -4 -13  -10.94   27.80
  -3  -4 -13  373.98   30.50
  -2  -4 -13   29.86   12.39
  -1  -4 -13   32.36   27.26
   0  -4 -13  -25.15   28.50
   1  -4 -13  384.74   30.84
   2  -4 -13  171.42   15.42
   3  -4 -13   63.69   12.95
   4  -4 -13   -8.44   30.60
   5  -4 -13   36.81   29.46
   6  -4 -13   -8.80   30.76
 -15  -4 -14   17.83   25.00
 -14  -4 -14   38.23   34.81
 -13  -4 -14  -41.47   34.93
 -12  -4 -14   33.73   30.84
 -11  -4 -14  -61.39   33.37
 -10  -4 -14  144.04   14.74
  -9  -4 -14  198.33   18.43
  -8  -4 -14  147.97   13.69
  -7  -4 -14   12.31   28.89
  -6  -4 -14   19.08   12.62
  -5  -4 -14  -11.88   30.00
  -4  -4 -14    9.78   27.99
  -3  -4 -14  -15.50   28.07
  -2  -4 -14  -23.12   29.23
  -1  -4 -14   76.20   13.17
   0  -4 -14   79.35   12.63
   1  -4 -14  -25.84   30.28
   2  -4 -14   -3.62   28.76
   3  -4 -14    5.72   27.74
   4  -4 -14   12.55   30.70
   5  -4 -14   23.63   21.70
 -14  -4 -15    3.43   34.98
 -13  -4 -15  -80.13   36.94
 -12  -4 -15   26.63   19.14
 -11  -4 -15  -12.75   32.66
 -10  -4 -15   13.38   31.28
  -9  -4 -15    2.23   31.85
  -8  -4 -15   19.17   31.13
  -7  -4 -15   15.30   31.00
  -6  -4 -15   32.46   28.16
  -5  -4 -15   35.59   28.63
  -4  -4 -15    2.13   29.35
  -3  -4 -15   52.33   13.41
  -2  -4 -15  -38.87   31.31
  -1  -4 -15   32.96   30.16
   0  -4 -15   59.57   13.86
   1  -4 -15  -74.82   32.76
   2  -4 -15   86.11   12.87
   3  -4 -15  -65.40   32.69
   4  -4 -15    5.02   32.06
 -13  -4 -16  -26.73   34.57
 -12  -4 -16   12.35   34.44
 -11  -4 -16   57.23   14.43
 -10  -4 -16  -44.32   32.34
  -9  -4 -16  101.80   15.10
  -8  -4 -16   27.70   30.74
  -7  -4 -16   29.68   31.31
  -6  -4 -16  -26.44   31.66
  -5  -4 -16   17.19   22.12
  -4  -4 -16   30.06   29.55
  -3  -4 -16   -1.05   32.31
  -2  -4 -16    6.59   30.85
  -1  -4 -16   64.04   13.97
   0  -4 -16   25.96   30.25
   1  -4 -16   17.65   15.42
   2  -4 -16   40.83   31.14
   3  -4 -16   -5.78   34.12
 -12  -4 -17  -34.53   35.38
 -11  -4 -17    2.22   34.52
 -10  -4 -17   16.18   32.59
  -9  -4 -17  -57.56   33.85
  -8  -4 -17   -4.19   32.77
  -7  -4 -17   24.91   30.08
  -6  -4 -17   30.59   30.81
  -5  -4 -17   16.99   30.22
  -4  -4 -17  -11.89   30.55
  -3  -4 -17   37.58   14.67
  -2  -4 -17  -37.54   33.48
  -1  -4 -17   -1.06   31.52
   0  -4 -17   -2.92   31.63
   1  -4 -17   37.28   32.26
 -11  -4 -18   44.43   15.49
 -10  -4 -18   44.25   33.81
  -9  -4 -18  -43.55   34.62
  -8  -4 -18   54.77   15.26
  -7  -4 -18   17.55   16.05
  -6  -4 -18   29.41   32.50
  -5  -4 -18  -15.82   33.23
  -4  -4 -18   15.39   32.53
  -3  -4 -18   12.93   23.50
  -2  -4 -18   -6.78   33.36
  -1  -4 -18   34.56   35.28
  -9  -4 -19   19.04   34.14
  -8  -4 -19  -35.28   35.70
  -7  -4 -19   32.09   32.48
  -6  -4 -19  -38.00   34.94
  -5  -4 -19  -56.59   35.23
  -4  -4 -19   34.18   23.32
  -3  -4 -19  -14.25   34.21
   1  -5  18  -61.54   35.64
   2  -5  18   13.58   32.09
   3  -5  18    3.49   35.08
   4  -5  18   40.86   33.93
   5  -5  18   39.43   32.23
   6  -5  18   29.51   23.19
   7  -5  18   -9.81   36.25
   8  -5  18   -3.38   34.03
  -1  -5  17   -4.67   34.16
   0  -5  17   38.86   34.20
   1  -5  17   40.79   32.42
   2  -5  17   42.97   32.63
   3  -5  17    4.72   33.77
   4  -5  17   33.37   33.98
   5  -5  17    8.33   30.80
   6  -5  17   33.17   31.28
   7  -5  17  -30.86   34.34
   8  -5  17   18.89   22.67
   9  -5  17  -23.19   34.99
  10  -5  17   12.96   32.85
  -3  -5  16  -70.76   36.12
  -2  -5  16   40.80   32.75
  -1  -5  16  146.86   15.18
   0  -5  16  128.95   14.88
   1  -5  16   81.51   15.39
   2  -5  16   43.60   34.14
   3  -5  16   -1.07   32.36
   4  -5  16   -2.43   32.13
   5  -5  16   21.39   17.67
   6  -5  16  184.08   17.25
   7  -5  16  124.85   14.83
   8  -5  16  159.40   15.42
   9  -5  16   22.04   32.03
  10  -5  16   18.34   32.36
  11  -5  16    7.44   16.34
  -4  -5  15   14.68   31.85
  -3  -5  15   32.78   14.18
  -2  -5  15   38.48   32.05
  -1  -5  15  -28.76   31.66
   0  -5  15   85.31   14.54
   1  -5  15   32.77   32.26
   2  -5  15   32.59   31.98
   3  -5  15   45.82   33.01
   4  -5  15   -0.63   30.83
   5  -5  15   42.23   13.81
   6  -5  15   18.73   29.89
   7  -5  15  141.54   15.41
   8  -5  15   17.74   30.17
   9  -5  15   14.94   31.90
  10  -5  15    9.21   32.85
  11  -5  15  -20.82   33.06
  12  -5  15  -11.72   34.43
  -6  -5  14  -30.02   34.96
  -5  -5  14  -13.37   34.32
  -4  -5  14  -19.62   31.96
  -3  -5  14  -10.42   32.45
  -2  -5  14    6.27   30.66
  -1  -5  14   39.48   29.18
   0  -5  14   26.76   29.44
   1  -5  14  204.38   19.29
   2  -5  14  -68.11   31.95
   3  -5  14  170.96   14.46
   4  -5  14   12.47   31.04
   5  -5  14   34.38   30.47
   6  -5  14    8.66   31.49
   7  -5  14    5.80   31.08
   8  -5  14   61.76   13.98
   9  -5  14   43.41   32.12
  10  -5  14   53.43   14.60
  11  -5  14   -3.88   31.84
  12  -5  14  -52.13   33.58
  -7  -5  13  -32.05   32.52
  -6  -5  13   55.55   14.38
  -5  -5  13   97.25   14.32
  -4  -5  13   33.93   14.00
  -3  -5  13   12.85   31.14
  -2  -5  13   27.70   29.63
  -1  -5  13  -16.47   29.98
   0  -5  13   33.73   28.06
   1  -5  13  166.26   15.31
   2  -5  13  241.60   22.68
   3  -5  13   23.54   28.57
   4  -5  13   12.25   28.73
   5  -5  13   58.38   13.15
   6  -5  13   15.97   29.64
   7  -5  13    3.25   30.67
   8  -5  13   11.21   32.38
   9  -5  13  -24.72   31.61
  10  -5  13   13.28   30.94
  11  -5  13   44.01   30.97
  12  -5  13   30.23   30.60
  13  -5  13  -69.37   37.49
  -8  -5  12   23.20   30.82
  -7  -5  12   15.87   30.70
  -6  -5  12   39.27   29.60
  -5  -5  12  -38.31   30.58
  -4  -5  12   20.16   29.32
  -3  -5  12   32.14   28.81
  -2  -5  12  -28.91   29.94
  -1  -5  12    7.03   28.67
   0  -5  12  465.13   32.98
   1  -5  12  -42.94   28.64
   2  -5  12   87.95   12.75
   3  -5  12   58.39   12.49
   4  -5  12   -4.01   28.20
   5  -5  12   40.54   27.05
   6  -5  12   61.06   13.02
   7  -5  12   42.62   29.67
   8  -5  12   43.24   32.09
   9  -5  12   16.25   20.95
  10  -5  12  -49.97   32.02
  11  -5  12   44.76   32.71
  12  -5  12   25.95   22.37
  13  -5  12   32.51   33.20
  -9  -5  11  -10.11   33.73
  -8  -5  11   42.52   30.91
  -7  -5  11   -4.58   29.52
  -6  -5  11   38.27   28.54
  -5  -5  11   71.91   13.61
  -4  -5  11  117.19   13.12
  -3  -5  11    0.14   28.84
  -2  -5  11  -28.27   27.84
  -1  -5  11  653.79   33.49
   0  -5  11  172.93   16.33
   1  -5  11   16.79   28.07
   2  -5  11   19.91   11.65
   3  -5  11  -19.76   26.57
   4  -5  11   89.29   12.32
   5  -5  11  126.89   12.44
   6  -5  11  194.98   16.89
   7  -5  11    0.95   28.17
   8  -5  11   37.75   29.19
   9  -5  11    3.65   29.35
  10  -5  11   17.65   31.93
  11  -5  11  -33.39   30.73
  12  -5  11   36.39   14.81
  13  -5  11   40.31   15.15
  14  -5  11   35.28   33.36
 -10  -5  10   42.10   15.07
  -9  -5  10  -26.86   33.08
  -8  -5  10   10.77   30.48
  -7  -5  10   38.78   13.16
  -6  -5  10   58.69   12.68
  -5  -5  10   27.35   27.92
  -4  -5  10  -23.35   28.78
  -3  -5  10    1.90   27.24
  -2  -5  10   79.16   11.80
  -1  -5  10   31.72   26.57
   0  -5  10   62.35   11.13
   1  -5  10  607.02   29.86
   2  -5  10  -22.36   25.30
   3  -5  10   63.15   11.15
   4  -5  10    7.70   24.73
   5  -5  10   16.62   25.03
   6  -5  10  -29.31   26.83
   7  -5  10   28.91   26.33
   8  -5  10   43.78   30.71
   9  -5  10   27.74   29.17
  10  -5  10  137.91   14.27
  11  -5  10   45.93   31.17
  12  -5  10  -16.81   31.95
  13  -5  10   32.46   32.31
  14  -5  10  -60.17   35.40
 -10  -5   9  -43.28   34.26
  -9  -5   9    7.92   31.20
  -8  -5   9   22.96   27.68
  -7  -5   9  -43.23   30.42
  -6  -5   9   37.43   28.14
  -5  -5   9   65.18   12.65
  -4  -5   9   37.81   26.95
  -3  -5   9  -11.74   26.40
  -2  -5   9  131.35   12.69
  -1  -5   9  123.34   12.24
   0  -5   9    3.59   22.47
   1  -5   9  416.23   26.87
   2  -5   9    3.92   21.88
   3  -5   9  -28.91   22.97
   4  -5   9   26.34   22.13
   5  -5   9   18.20   24.28
   6  -5   9   -7.76   24.33
   7  -5   9  160.51   15.91
   8  -5   9  181.67   17.34
   9  -5   9  -22.92   29.11
  10  -5   9  267.23   23.70
  11  -5   9   20.88   30.63
  12  -5   9   12.84   30.42
  13  -5   9  -13.65   33.33
  14  -5   9  -44.92   35.77
 -11  -5   8  -26.70   36.45
 -10  -5   8  -22.34   31.57
  -9  -5   8   63.87   13.71
  -8  -5   8  147.13   14.04
  -7  -5   8  110.78   13.26
  -6  -5   8  100.84   12.19
  -5  -5   8   42.88   11.47
  -4  -5   8  128.09   11.30
  -3  -5   8   99.97   10.87
  -2  -5   8  127.33   11.77
  -1  -5   8  241.92   23.78
   0  -5   8  417.62   24.60
   1  -5   8  301.63   23.10
   2  -5   8   30.40    9.13
   3  -5   8  -12.11   21.18
   4  -5   8   -0.80   21.80
   5  -5   8   91.84   10.60
   6  -5   8  -14.33   24.74
   7  -5   8    5.31   24.74
   8  -5   8   37.89   27.94
   9  -5   8   36.27   30.86
  10  -5   8   25.64   29.79
  11  -5   8  -22.36   31.45
  12  -5   8   40.53   29.09
  13  -5   8   29.79   30.23
  14  -5   8   24.36   31.42
 -12  -5   7  -52.85   37.84
 -11  -5   7   31.57   33.67
 -10  -5   7   14.00   30.66
  -9  -5   7   51.77   14.01
  -8  -5   7   39.38   13.16
  -7  -5   7  -40.75   29.14
  -6  -5   7   79.53   11.92
  -5  -5   7   19.79   13.92
  -4  -5   7   69.80   10.18
  -3  -5   7  181.58   16.56
  -2  -5   7  292.19   21.96
  -1  -5   7  350.79   23.05
   0  -5   7   75.85    8.91
   1  -5   7  470.45   22.87
   2  -5   7   -7.65   19.53
   3  -5   7   64.01    8.96
   4  -5   7  168.73   16.18
   5  -5   7   13.46   10.63
   6  -5   7   94.96   10.70
   7  -5   7  100.95   11.67
   8  -5   7   -0.35   26.71
   9  -5   7  135.57   13.19
  10  -5   7   26.97   28.17
  11  -5   7   13.49   29.25
  12  -5   7    0.50   30.08
  13  -5   7    4.46   32.32
  14  -5   7  -20.79   33.48
 -12  -5   6    2.38   34.40
 -11  -5   6   40.33   14.33
 -10  -5   6  -19.99   31.75
  -9  -5   6  107.79   13.92
  -8  -5   6   26.51   12.24
  -7  -5   6    8.72   27.03
  -6  -5   6  150.64   13.10
  -5  -5   6  130.33   12.29
  -4  -5   6  130.32   11.25
  -3  -5   6 2688.71   40.08
  -2  -5   6   -2.38   19.40
  -1  -5   6  125.32   11.49
   0  -5   6  510.29   21.83
   1  -5   6   50.06    8.27
   2  -5   6  406.08   21.07
   3  -5   6  -11.27   18.69
   4  -5   6  -30.34   20.26
   5  -5   6   18.38   19.64
   6  -5   6   84.96    9.97
   7  -5   6   86.01   10.38
   8  -5   6  100.95   11.85
   9  -5   6   34.62   12.16
  10  -5   6   38.31   28.74
  11  -5   6  204.75   18.79
  12  -5   6  -12.81   30.51
  13  -5   6   -4.70   32.92
  14  -5   6    8.81   31.70
 -13  -5   5  -65.84   37.34
 -12  -5   5  113.28   15.36
 -11  -5   5  133.14   15.23
 -10  -5   5   90.07   14.12
  -9  -5   5   87.08   13.64
  -8  -5   5  413.78   33.77
  -7  -5   5   76.51   11.77
  -6  -5   5   86.06   11.01
  -5  -5   5 1184.68   32.46
  -4  -5   5    1.70   19.90
  -3  -5   5  143.64   11.80
  -2  -5   5  202.80   13.92
  -1  -5   5   14.57   17.91
   0  -5   5   -1.97   18.02
   1  -5   5  -12.83   17.17
   2  -5   5   -0.52   16.94
   3  -5   5   93.67    8.30
   4  -5   5    1.72   10.79
   5  -5   5   -7.14   19.63
   6  -5   5   18.40    9.39
   7  -5   5   19.38   10.31
   8  -5   5  120.02   11.85
   9  -5   5   -9.80   27.60
  10  -5   5  -38.85   30.04
  11  -5   5  -31.54   32.24
  12  -5   5    8.78   30.49
  13  -5   5   23.23   32.87
  14  -5   5  -23.14   33.83
 -13  -5   4   21.98   34.98
 -12  -5   4   10.86   33.60
 -11  -5   4  -27.40   32.37
 -10  -5   4  -82.29   32.30
  -9  -5   4  106.39   13.08
  -8  -5   4   79.73   11.97
  -7  -5   4   40.89   11.16
  -6  -5   4   27.42   21.83
  -5  -5   4   18.41   19.91
  -4  -5   4  373.73   22.05
  -3  -5   4   63.96    7.81
  -2  -5   4  852.96   23.68
  -1  -5   4  122.03   10.39
   0  -5   4    6.26   12.41
   1  -5   4  196.59   19.27
   2  -5   4   81.39    7.90
   3  -5   4  291.38   20.49
   4  -5   4  -25.31   18.74
   5  -5   4  152.77   14.18
   6  -5   4   13.21   21.60
   7  -5   4   -1.97   23.51
   8  -5   4  321.12   27.57
   9  -5   4   39.19   27.83
  10  -5   4   51.44   12.97
  11  -5   4  211.85   19.44
  12  -5   4   72.07   13.91
  13  -5   4   -5.72   32.44
  14  -5   4  -12.12   33.76
 -14  -5   3   11.44   35.10
 -13  -5   3   43.05   31.65
 -12  -5   3   -1.23   22.49
 -11  -5   3   -6.88   30.74
 -10  -5   3   31.67   28.28
  -9  -5   3   15.14   27.55
  -8  -5   3   92.27   11.79
  -7  -5   3 1352.97   35.67
  -6  -5   3  486.07   26.85
  -5  -5   3   36.97    8.16
  -4  -5   3 2051.21   32.55
  -3  -5   3   14.04   12.01
  -2  -5   3  225.81   18.59
  -1  -5   3  938.68   23.66
   0  -5   3  407.53   19.95
   1  -5   3  271.85   19.34
   2  -5   3    8.12   17.00
   3  -5   3    1.72   17.40
   4  -5   3   37.98    8.16
   5  -5   3   64.12    8.68
   6  -5   3   -9.25   21.79
   7  -5   3  110.27   10.78
   8  -5   3  -48.39   26.30
   9  -5   3  -23.41   29.54
  10  -5   3   22.10   30.62
  11  -5   3    1.76   29.36
  12  -5   3   24.43   30.95
  13  -5   3   49.10   32.98
  14  -5   3   31.62   23.11
 -14  -5   2  -22.44   34.18
 -13  -5   2   36.28   32.23
 -12  -5   2    0.68   31.14
 -11  -5   2  -36.84   32.76
 -10  -5   2   18.75   27.06
  -9  -5   2   35.56   12.55
  -8  -5   2   86.60   11.55
  -7  -5   2  274.04   24.89
  -6  -5   2 1291.96   30.21
  -5  -5   2   -3.38   18.34
  -4  -5   2  462.90   21.33
  -3  -5   2  110.31   10.23
  -2  -5   2  214.38   18.48
  -1  -5   2  159.82   12.00
   0  -5   2  301.77   17.91
   1  -5   2  602.42   20.73
   2  -5   2  419.48   20.58
   3  -5   2  132.15   13.12
   4  -5   2  182.39   13.80
   5  -5   2   30.11   20.35
   6  -5   2 1267.48   33.42
   7  -5   2  -12.86   23.83
   8  -5   2    9.91   25.52
   9  -5   2   60.59   12.25
  10  -5   2   29.77   27.92
  11  -5   2   90.22   13.99
  12  -5   2   56.90   14.47
  13  -5   2   12.27   33.59
  14  -5   2  -29.17   34.42
 -14  -5   1   13.60   32.58
 -13  -5   1   42.32   13.69
 -12  -5   1  -12.06   30.75
 -11  -5   1   -3.11   29.28
 -10  -5   1   16.73   15.90
  -9  -5   1  -15.27   25.61
  -8  -5   1  -12.26   23.69
  -7  -5   1   81.99    9.82
  -6  -5   1   28.19   19.50
  -5  -5   1 2372.29   33.91
  -4  -5   1  -25.63   17.16
  -3  -5   1  322.89   18.71
  -2  -5   1  182.03   17.44
  -1  -5   1   -3.58   15.94
   0  -5   1  103.48    9.50
   1  -5   1  247.52   17.35
   2  -5   1  295.96   19.62
   3  -5   1  389.25   19.69
   4  -5   1 3930.82   42.13
   5  -5   1  394.00   23.64
   6  -5   1  786.28   29.06
   7  -5   1  -86.66   24.43
   8  -5   1    6.82   25.03
   9  -5   1  156.31   14.04
  10  -5   1   28.10   30.97
  11  -5   1  101.14   13.93
  12  -5   1   41.04   29.84
  13  -5   1  -14.04   32.70
 -15  -5   0   37.55   36.89
 -14  -5   0  -58.65   35.01
 -13  -5   0  -34.92   33.39
 -12  -5   0   29.04   30.60
 -11  -5   0   35.68   28.99
 -10  -5   0  243.49   21.21
  -9  -5   0   95.57   11.75
  -8  -5   0  286.79   18.30
  -7  -5   0   59.63    9.29
  -6  -5   0    8.91   17.85
  -5  -5   0  528.05   21.54
  -4  -5   0  -28.00   17.04
  -3  -5   0   47.54    7.35
  -2  -5   0   42.15    7.19
  -1  -5   0   62.72    7.06
   0  -5   0   10.56   15.48
   1  -5   0    4.12   16.63
   2  -5   0 1062.18   23.63
   3  -5   0    9.62   17.42
   4  -5   0  294.21   20.96
   5  -5   0 1110.18   29.68
   6  -5   0  602.08   28.46
   7  -5   0  -20.03   23.98
   8  -5   0  156.33   13.68
   9  -5   0   13.42   26.41
  10  -5   0  101.60   13.61
  11  -5   0  -44.78   30.95
  12  -5   0   26.76   30.78
  13  -5   0   42.06   32.70
 -15  -5  -1   17.04   32.41
 -14  -5  -1  -34.55   34.97
 -13  -5  -1  -25.35   31.90
 -12  -5  -1   15.98   30.52
 -11  -5  -1   22.73   28.11
 -10  -5  -1   14.90   26.43
  -9  -5  -1   37.43   26.33
  -8  -5  -1  161.40   13.76
  -7  -5  -1  378.15   23.32
  -6  -5  -1  857.48   25.20
  -5  -5  -1   14.90   16.99
  -4  -5  -1  211.28   18.88
  -3  -5  -1   63.01    7.26
  -2  -5  -1   84.03    7.18
  -1  -5  -1   24.22    6.99
   0  -5  -1   19.68   15.66
   1  -5  -1    4.44   16.36
   2  -5  -1   -0.31   16.25
   3  -5  -1 1696.85   28.99
   4  -5  -1   -0.23   20.39
   5  -5  -1  347.54   23.93
   6  -5  -1   29.40    9.90
   7  -5  -1  -27.41   24.45
   8  -5  -1   41.32   11.40
   9  -5  -1    9.47   28.31
  10  -5  -1   27.14   31.75
  11  -5  -1   21.84   30.48
  12  -5  -1   16.27   32.08
  13  -5  -1    5.90   31.89
 -15  -5  -2    4.14   32.77
 -14  -5  -2  -11.70   32.47
 -13  -5  -2   47.80   14.12
 -12  -5  -2  -25.72   32.35
 -11  -5  -2   -1.10   28.92
 -10  -5  -2   71.83   12.28
  -9  -5  -2  497.52   29.10
  -8  -5  -2   -1.75   22.70
  -7  -5  -2   88.29    9.54
  -6  -5  -2  557.04   22.79
  -5  -5  -2    8.61   16.92
  -4  -5  -2   52.84    7.56
  -3  -5  -2   14.73   16.94
  -2  -5  -2  251.72   18.55
  -1  -5  -2   82.33    8.14
   0  -5  -2   40.03    7.35
   1  -5  -2  776.32   22.24
   2  -5  -2  209.98   12.96
   3  -5  -2 1560.77   28.51
   4  -5  -2   76.92    8.83
   5  -5  -2 1941.35   36.85
   6  -5  -2  142.97   13.92
   7  -5  -2   88.28   11.73
   8  -5  -2  -10.72   27.15
   9  -5  -2   24.46   28.82
  10  -5  -2   10.02   30.36
  11  -5  -2   75.33   14.17
  12  -5  -2  -25.09   32.65
  13  -5  -2  -41.55   35.12
 -15  -5  -3  -19.19   34.72
 -14  -5  -3   25.65   32.38
 -13  -5  -3  -13.46   31.61
 -12  -5  -3   28.98   29.63
 -11  -5  -3  121.95   13.22
 -10  -5  -3   -2.71   26.35
  -9  -5  -3  106.21   11.26
  -8  -5  -3  284.98   25.03
  -7  -5  -3   13.23    8.91
  -6  -5  -3   84.89    8.49
  -5  -5  -3   88.92    8.05
  -4  -5  -3   32.94    7.51
  -3  -5  -3  126.32   10.05
  -2  -5  -3   50.67    7.35
  -1  -5  -3   18.60   15.50
   0  -5  -3  239.74   17.92
   1  -5  -3   -6.61   16.49
   2  -5  -3  340.64   20.04
   3  -5  -3   11.58   17.38
   4  -5  -3  989.47   28.35
   5  -5  -3  114.50   11.14
   6  -5  -3    9.46   24.38
   7  -5  -3   97.51   12.01
   8  -5  -3   17.55   27.97
   9  -5  -3   32.80   29.11
  10  -5  -3    0.70   30.40
  11  -5  -3   37.03   30.72
  12  -5  -3   -4.06   33.03
 -16  -5  -4    0.20   34.52
 -15  -5  -4   62.36   14.92
 -14  -5  -4   13.00   32.23
 -13  -5  -4   23.72   31.22
 -12  -5  -4   57.05   13.45
 -11  -5  -4   30.51   29.04
 -10  -5  -4   20.60   26.89
  -9  -5  -4  274.60   27.32
  -8  -5  -4  389.32   25.10
  -7  -5  -4   80.83    8.94
  -6  -5  -4  -17.19   18.53
  -5  -5  -4   -6.89   16.64
  -4  -5  -4  -16.03   17.00
  -3  -5  -4   83.29    7.68
  -2  -5  -4   16.64   17.06
  -1  -5  -4   16.23   16.17
   0  -5  -4  218.41   18.02
   1  -5  -4   40.35    7.46
   2  -5  -4 1342.04   27.70
   3  -5  -4  250.42   21.26
   4  -5  -4   30.44    9.00
   5  -5  -4  306.43   24.07
   6  -5  -4   90.17   11.41
   7  -5  -4    2.29   28.49
   8  -5  -4   -1.53   19.99
   9  -5  -4  160.42   14.02
  10  -5  -4   30.24   28.77
  11  -5  -4   21.82   32.74
  12  -5  -4  -29.57   35.71
 -16  -5  -5    5.11   35.80
 -15  -5  -5  -20.06   33.59
 -14  -5  -5    2.04   33.77
 -13  -5  -5   11.20   31.56
 -12  -5  -5   62.15   13.51
 -11  -5  -5   33.83   29.56
 -10  -5  -5  358.26   30.04
  -9  -5  -5   30.15   11.00
  -8  -5  -5   83.03    9.60
  -7  -5  -5  289.34   21.80
  -6  -5  -5   -1.33   18.95
  -5  -5  -5  366.59   20.63
  -4  -5  -5   -3.89   17.87
  -3  -5  -5    0.28   16.51
  -2  -5  -5   71.10    7.77
  -1  -5  -5  207.75   18.34
   0  -5  -5   93.69    8.71
   1  -5  -5   77.12    7.98
   2  -5  -5   17.22   18.32
   3  -5  -5  -29.43   20.34
   4  -5  -5  281.98   23.72
   5  -5  -5  -15.93   23.22
   6  -5  -5   23.07   25.27
   7  -5  -5   63.33   12.45
   8  -5  -5   29.56   28.95
   9  -5  -5  -13.50   29.21
  10  -5  -5    4.41   30.68
  11  -5  -5   42.92   30.27
 -16  -5  -6   15.51   34.37
 -15  -5  -6   43.19   30.38
 -14  -5  -6  -36.02   32.00
 -13  -5  -6   34.42   13.66
 -12  -5  -6   44.79   30.05
 -11  -5  -6    3.50   29.62
 -10  -5  -6   42.04   11.98
  -9  -5  -6   15.73   25.42
  -8  -5  -6   12.01   21.87
  -7  -5  -6  140.41   12.72
  -6  -5  -6   80.55    9.08
  -5  -5  -6   22.59   18.12
  -4  -5  -6  536.61   22.63
  -3  -5  -6   42.48    7.87
  -2  -5  -6   17.50   16.91
  -1  -5  -6  185.90   13.46
   0  -5  -6   13.20   17.03
   1  -5  -6  334.97   21.85
   2  -5  -6   93.01    8.72
   3  -5  -6  311.32   21.29
   4  -5  -6   17.86   10.15
   5  -5  -6   61.68   11.00
   6  -5  -6    3.08   28.53
   7  -5  -6  -22.93   28.64
   8  -5  -6  -35.03   28.85
   9  -5  -6   42.55   29.27
  10  -5  -6   30.54   35.38
  11  -5  -6    5.49   31.28
 -16  -5  -7   15.23   19.52
 -15  -5  -7   29.34   32.73
 -14  -5  -7   40.91   31.27
 -13  -5  -7  -13.21   31.02
 -12  -5  -7   54.61   13.55
 -11  -5  -7  146.47   13.58
 -10  -5  -7  146.59   13.10
  -9  -5  -7  170.19   15.50
  -8  -5  -7  344.03   26.20
  -7  -5  -7  115.59   11.08
  -6  -5  -7  234.27   23.05
  -5  -5  -7  185.48   14.45
  -4  -5  -7  145.33   11.12
  -3  -5  -7  287.14   20.60
  -2  -5  -7  278.42   19.08
  -1  -5  -7   15.45   17.32
   0  -5  -7   61.65    8.45
   1  -5  -7  145.87   12.38
   2  -5  -7   -9.17   20.42
   3  -5  -7  389.93   24.64
   4  -5  -7   62.31   10.77
   5  -5  -7   71.00   11.64
   6  -5  -7   26.26   11.70
   7  -5  -7    3.62   28.59
   8  -5  -7   34.05   28.42
   9  -5  -7   13.25   30.65
  10  -5  -7   22.41   31.10
 -16  -5  -8   20.29   33.78
 -15  -5  -8   27.46   33.62
 -14  -5  -8  -17.26   33.68
 -13  -5  -8   -1.93   31.69
 -12  -5  -8   22.31   29.29
 -11  -5  -8   42.02   28.87
 -10  -5  -8  -27.86   27.98
  -9  -5  -8   17.06   25.61
  -8  -5  -8  -57.41   25.53
  -7  -5  -8    2.58   22.29
  -6  -5  -8  100.00    9.76
  -5  -5  -8   79.31    9.31
  -4  -5  -8   38.81    8.80
  -3  -5  -8  653.83   24.47
  -2  -5  -8   23.95    8.75
  -1  -5  -8   75.68    9.27
   0  -5  -8  424.67   24.20
   1  -5  -8    4.00   20.60
   2  -5  -8  608.70   29.53
   3  -5  -8  -17.80   24.32
   4  -5  -8   62.03   11.45
   5  -5  -8  -12.02   26.80
   6  -5  -8   13.39   26.83
   7  -5  -8  -11.94   29.95
   8  -5  -8   -1.14   20.65
   9  -5  -8   31.85   31.29
  10  -5  -8  -20.44   33.78
 -16  -5  -9   -3.67   34.91
 -15  -5  -9   42.73   33.82
 -14  -5  -9   15.80   32.00
 -13  -5  -9   41.90   32.86
 -12  -5  -9   33.01   13.61
 -11  -5  -9  -29.06   29.76
 -10  -5  -9  134.06   12.98
  -9  -5  -9   -9.78   26.57
  -8  -5  -9   63.07   11.30
  -7  -5  -9  102.76   11.05
  -6  -5  -9  -25.12   23.20
  -5  -5  -9   21.96   20.17
  -4  -5  -9  257.31   23.15
  -3  -5  -9   20.19   22.10
  -2  -5  -9   15.24   21.40
  -1  -5  -9  175.73   16.57
   0  -5  -9  617.63   28.84
   1  -5  -9   12.47   22.37
   2  -5  -9  379.37   26.92
   3  -5  -9   87.27   11.77
   4  -5  -9   15.35   26.96
   5  -5  -9  -53.59   28.65
   6  -5  -9  -31.28   29.35
   7  -5  -9    3.75   30.13
   8  -5  -9    5.29   29.65
   9  -5  -9   30.17   32.35
 -16  -5 -10   35.87   34.40
 -15  -5 -10  -24.86   36.40
 -14  -5 -10   25.46   33.35
 -13  -5 -10   -2.92   32.39
 -12  -5 -10   13.66   30.88
 -11  -5 -10  -25.08   30.11
 -10  -5 -10  170.07   16.93
  -9  -5 -10  -29.16   28.14
  -8  -5 -10   60.55   11.97
  -7  -5 -10   18.49   23.77
  -6  -5 -10   15.96   23.67
  -5  -5 -10  270.40   18.88
  -4  -5 -10   30.48   10.33
  -3  -5 -10  110.54   10.51
  -2  -5 -10  269.75   25.13
  -1  -5 -10   15.23   22.50
   0  -5 -10   84.82   10.55
   1  -5 -10    7.46   25.18
   2  -5 -10   55.04   11.36
   3  -5 -10   18.92   25.78
   4  -5 -10   19.13   18.56
   5  -5 -10   53.48   12.47
   6  -5 -10   27.14   28.11
   7  -5 -10  -10.50   30.20
   8  -5 -10  -11.87   33.12
 -15  -5 -11   31.63   15.38
 -14  -5 -11  -34.59   33.15
 -13  -5 -11   19.94   30.04
 -12  -5 -11   22.69   13.28
 -11  -5 -11   97.36   13.69
 -10  -5 -11   -4.55   28.91
  -9  -5 -11  109.97   13.26
  -8  -5 -11   25.81   27.12
  -7  -5 -11   28.09   27.13
  -6  -5 -11  244.09   19.66
  -5  -5 -11   23.97   25.03
  -4  -5 -11  -14.95   24.87
  -3  -5 -11  175.10   15.30
  -2  -5 -11  156.18   15.28
  -1  -5 -11   -5.50   25.17
   0  -5 -11   22.03   23.98
   1  -5 -11  328.60   21.01
   2  -5 -11   17.75   25.83
   3  -5 -11   21.98   27.14
   4  -5 -11   63.74   12.68
   5  -5 -11    6.88   28.98
   6  -5 -11    9.77   20.84
   7  -5 -11    5.03   31.57
 -15  -5 -12    2.03   33.36
 -14  -5 -12  -72.87   35.28
 -13  -5 -12   46.30   32.99
 -12  -5 -12   38.53   29.81
 -11  -5 -12   18.79   30.99
 -10  -5 -12   10.03   29.23
  -9  -5 -12   24.46   26.90
  -8  -5 -12  146.51   13.43
  -7  -5 -12   46.78   12.00
  -6  -5 -12    4.81   25.73
  -5  -5 -12  101.71   12.41
  -4  -5 -12  252.91   20.70
  -3  -5 -12   13.72   18.41
  -2  -5 -12  -35.74   27.35
  -1  -5 -12  265.47   21.23
   0  -5 -12   -6.81   27.69
   1  -5 -12  -11.61   28.24
   2  -5 -12   90.63   12.51
   3  -5 -12  121.63   13.03
   4  -5 -12   40.85   29.06
   5  -5 -12   17.53   27.42
   6  -5 -12   -4.77   30.86
   7  -5 -12   19.97   32.34
 -15  -5 -13  -20.98   34.53
 -14  -5 -13   15.35   31.46
 -13  -5 -13   69.50   14.75
 -12  -5 -13    6.79   22.41
 -11  -5 -13   58.58   13.42
 -10  -5 -13   11.91   30.61
  -9  -5 -13   16.56   16.84
  -8  -5 -13  -14.32   28.58
  -7  -5 -13   35.05   27.79
  -6  -5 -13   12.47   27.56
  -5  -5 -13  -32.66   28.74
  -4  -5 -13   26.47   27.28
  -3  -5 -13   14.87   26.69
  -2  -5 -13   17.02   25.99
  -1  -5 -13   22.16   29.09
   0  -5 -13   -1.29   28.11
   1  -5 -13   68.78   13.15
   2  -5 -13    9.92   28.36
   3  -5 -13    9.55   28.47
   4  -5 -13   34.77   27.70
   5  -5 -13   36.32   29.37
   6  -5 -13   13.86   21.54
 -14  -5 -14   22.77   33.96
 -13  -5 -14   24.40   32.82
 -12  -5 -14   48.94   14.87
 -11  -5 -14   -2.36   31.77
 -10  -5 -14   37.43   30.76
  -9  -5 -14   27.74   29.37
  -8  -5 -14   29.78   20.33
  -7  -5 -14    7.57   21.18
  -6  -5 -14  -28.57   29.34
  -5  -5 -14   42.16   13.04
  -4  -5 -14   42.41   12.63
  -3  -5 -14   82.68   13.67
  -2  -5 -14   48.96   12.65
  -1  -5 -14  -25.50   29.89
   0  -5 -14  127.11   13.78
   1  -5 -14   86.94   13.60
   2  -5 -14  -10.65   31.36
   3  -5 -14    9.44   29.26
   4  -5 -14  -27.96   32.17
   5  -5 -14    7.16   31.93
 -14  -5 -15   25.83   34.43
 -13  -5 -15   62.98   15.31
 -12  -5 -15  171.37   16.09
 -11  -5 -15    6.41   30.19
 -10  -5 -15    2.11   30.67
  -9  -5 -15   24.02   29.66
  -8  -5 -15   13.23   30.25
  -7  -5 -15   39.16   28.33
  -6  -5 -15   13.18   29.55
  -5  -5 -15    5.80   30.05
  -4  -5 -15   40.16   30.72
  -3  -5 -15   15.33   29.22
  -2  -5 -15    8.58   30.63
  -1  -5 -15   22.30   31.16
   0  -5 -15   23.77   29.24
   1  -5 -15    2.29   29.76
   2  -5 -15   45.95   14.29
   3  -5 -15   34.82   29.95
   4  -5 -15  -44.03   33.03
 -13  -5 -16  -23.95   35.65
 -12  -5 -16   26.34   31.83
 -11  -5 -16  -31.82   33.35
 -10  -5 -16   18.72   32.99
  -9  -5 -16   -6.44   30.75
  -8  -5 -16   -2.23   33.03
  -7  -5 -16    0.82   30.81
  -6  -5 -16   -3.60   30.20
  -5  -5 -16  -23.50   30.37
  -4  -5 -16   44.14   32.50
  -3  -5 -16   14.08   29.99
  -2  -5 -16   16.80   13.38
  -1  -5 -16  207.26   19.80
   0  -5 -16   17.22   18.27
   1  -5 -16   47.07   14.49
   2  -5 -16   30.56   21.01
 -12  -5 -17  -10.62   34.79
 -11  -5 -17   38.33   31.67
 -10  -5 -17  107.13   15.06
  -9  -5 -17   11.03   33.28
  -8  -5 -17   35.95   30.29
  -7  -5 -17  -18.93   33.37
  -6  -5 -17   28.57   32.18
  -5  -5 -17   28.87   29.61
  -4  -5 -17   33.39   32.28
  -3  -5 -17   11.17   36.43
  -2  -5 -17   22.85   13.86
  -1  -5 -17   26.78   22.05
   0  -5 -17   -8.28   32.90
   1  -5 -17   56.75   14.93
 -11  -5 -18    4.86   32.99
 -10  -5 -18   38.26   15.06
  -9  -5 -18   38.84   31.30
  -8  -5 -18   27.57   23.15
  -7  -5 -18  -24.26   33.60
  -6  -5 -18    9.42   18.47
  -5  -5 -18   15.99   31.69
  -4  -5 -18   24.68   32.29
  -3  -5 -18   41.91   32.53
  -2  -5 -18    5.37   32.29
  -1  -5 -18   17.09   32.26
  -8  -5 -19  -23.29   33.82
  -7  -5 -19  -94.57   36.12
  -6  -5 -19   18.34   32.45
  -5  -5 -19   44.14   32.59
  -4  -5 -19   21.72   16.57
   3  -6  18  -53.11   37.46
   4  -6  18  -26.63   35.25
   5  -6  18   19.82   14.76
   6  -6  18   -8.26   34.74
   0  -6  17   22.31   34.83
   1  -6  17   46.98   15.04
   2  -6  17  -68.07   35.33
   3  -6  17   46.34   35.33
   4  -6  17   -8.23   32.84
   5  -6  17  -19.31   34.26
   6  -6  17  -16.47   35.09
   7  -6  17   10.11   32.13
   8  -6  17   35.88   15.27
  -2  -6  16  -26.06   33.85
  -1  -6  16   15.41   32.53
   0  -6  16  -32.28   35.40
   1  -6  16    4.85   34.80
   2  -6  16  -28.86   32.48
   3  -6  16    0.10   31.70
   4  -6  16   40.24   32.60
   5  -6  16   19.62   33.76
   6  -6  16   10.41   31.92
   7  -6  16  -27.99   32.61
   8  -6  16   42.56   32.86
   9  -6  16   15.98   35.07
  10  -6  16   29.16   32.30
  -4  -6  15  -39.79   34.42
  -3  -6  15  -39.15   34.01
  -2  -6  15   89.94   14.88
  -1  -6  15   -8.25   33.31
   0  -6  15   63.16   14.69
   1  -6  15    7.46   30.58
   2  -6  15   13.76   31.59
   3  -6  15  -25.72   31.45
   4  -6  15  -19.52   31.76
   5  -6  15   71.50   14.50
   6  -6  15  -31.95   33.91
   7  -6  15   60.37   15.13
   8  -6  15   66.59   14.76
   9  -6  15   66.52   14.64
  10  -6  15   20.92   33.81
  11  -6  15    4.08   33.75
  -5  -6  14   17.07   31.66
  -4  -6  14   79.08   14.23
  -3  -6  14   99.54   14.82
  -2  -6  14   16.52   31.86
  -1  -6  14   -4.74   29.62
   0  -6  14   28.04   30.09
   1  -6  14   -8.64   31.44
   2  -6  14  -33.33   30.15
   3  -6  14   40.71   32.61
   4  -6  14  -24.18   30.78
   5  -6  14   46.83   13.31
   6  -6  14  -35.79   32.31
   7  -6  14   12.73   30.34
   8  -6  14  -38.04   32.97
   9  -6  14   20.30   30.75
  10  -6  14   48.95   14.76
  11  -6  14   13.72   32.46
  12  -6  14  -28.64   34.25
  -7  -6  13   22.38   31.07
  -6  -6  13  -27.74   34.50
  -5  -6  13  -16.30   31.62
  -4  -6  13  -14.45   30.40
  -3  -6  13   90.08   14.11
  -2  -6  13   21.53   29.49
  -1  -6  13   -5.80   29.89
   0  -6  13  -41.38   30.93
   1  -6  13   -5.96   28.69
   2  -6  13  109.78   13.24
   3  -6  13    9.69   30.21
   4  -6  13   68.32   13.34
   5  -6  13   37.79   30.33
   6  -6  13   21.63   29.86
   7  -6  13   42.13   13.83
   8  -6  13  -12.86   30.84
   9  -6  13   27.52   14.38
  10  -6  13   12.56   18.70
  11  -6  13  -67.91   34.23
  12  -6  13  -32.89   33.79
  -8  -6  12   -6.87   33.88
  -7  -6  12   -0.16   31.12
  -6  -6  12  -53.19   33.77
  -5  -6  12  -24.67   30.44
  -4  -6  12   31.07   29.45
  -3  -6  12  213.94   19.07
  -2  -6  12   79.29   13.49
  -1  -6  12   -7.14   30.56
   0  -6  12   29.11   29.00
   1  -6  12   -8.90   28.10
   2  -6  12  139.58   13.61
   3  -6  12   88.43   12.95
   4  -6  12  331.74   31.37
   5  -6  12  274.22   22.28
   6  -6  12   45.87   12.90
   7  -6  12   -6.07   30.29
   8  -6  12  111.51   14.36
   9  -6  12  -49.19   31.07
  10  -6  12   52.63   13.48
  11  -6  12   36.65   31.41
  12  -6  12  -34.16   35.36
  13  -6  12  -29.83   35.30
  -8  -6  11   33.59   30.05
  -7  -6  11  -15.31   31.49
  -6  -6  11   17.21   28.24
  -5  -6  11    6.96   28.80
  -4  -6  11    4.84   28.87
  -3  -6  11  -16.27   28.79
  -2  -6  11  -46.05   28.42
  -1  -6  11  435.01   30.81
   0  -6  11  -21.81   26.89
   1  -6  11   18.80   26.17
   2  -6  11    2.31   28.23
   3  -6  11  158.77   14.16
   4  -6  11  -52.93   28.59
   5  -6  11    2.41   28.22
   6  -6  11  -27.36   30.79
   7  -6  11   85.23   13.11
   8  -6  11   -2.33   30.45
   9  -6  11   22.06   20.99
  10  -6  11   25.37   32.83
  11  -6  11   45.42   30.46
  12  -6  11   28.31   31.99
  13  -6  11   17.76   33.48
  -9  -6  10    4.51   31.67
  -8  -6  10   43.71   30.94
  -7  -6  10  -15.79   29.64
  -6  -6  10    8.67   28.39
  -5  -6  10  -21.11   28.08
  -4  -6  10   39.13   28.73
  -3  -6  10  108.58   12.57
  -2  -6  10  245.68   20.53
  -1  -6  10   -2.67   26.55
   0  -6  10  154.50   13.64
   1  -6  10   27.74   25.26
   2  -6  10    6.53   25.66
   3  -6  10  121.44   11.81
   4  -6  10  131.12   11.87
   5  -6  10  180.07   16.09
   6  -6  10   -7.24   26.94
   7  -6  10   15.67   12.87
   8  -6  10   12.50   29.14
   9  -6  10  118.27   13.95
  10  -6  10   26.03   13.76
  11  -6  10  -12.42   32.21
  12  -6  10  105.97   14.61
  13  -6  10   23.37   23.14
 -10  -6   9   14.38   32.97
  -9  -6   9  -27.99   32.50
  -8  -6   9   12.76   28.76
  -7  -6   9  -21.64   29.43
  -6  -6   9   11.86   28.11
  -5  -6   9  -10.66   28.98
  -4  -6   9  -21.79   26.36
  -3  -6   9   -0.07   25.76
  -2  -6   9  182.08   17.81
  -1  -6   9  -17.04   24.90
   0  -6   9  149.00   14.41
   1  -6   9   66.69   10.77
   2  -6   9   31.81   22.94
   3  -6   9   14.82   23.24
   4  -6   9   21.75   17.30
   5  -6   9  -21.60   26.18
   6  -6   9    3.52   26.71
   7  -6   9  128.67   12.85
   8  -6   9  108.71   13.20
   9  -6   9   51.40   12.84
  10  -6   9   42.16   31.52
  11  -6   9  -17.17   29.72
  12  -6   9    6.95   30.68
  13  -6   9   -9.59   32.90
 -11  -6   8   27.72   32.67
 -10  -6   8   19.44   15.73
  -9  -6   8   34.01   13.81
  -8  -6   8   12.07   30.47
  -7  -6   8   14.90   27.13
  -6  -6   8   31.04   27.35
  -5  -6   8    3.09   25.90
  -4  -6   8  112.04   12.01
  -3  -6   8   19.05   16.77
  -2  -6   8  131.18   11.99
  -1  -6   8   49.47   10.29
   0  -6   8   67.53    9.89
   1  -6   8   68.42   10.00
   2  -6   8   -6.68   22.82
   3  -6   8    8.59   23.29
   4  -6   8   13.29   23.00
   5  -6   8   32.13   10.92
   6  -6   8   -6.34   25.24
   7  -6   8  140.10   13.49
   8  -6   8   32.95   28.47
   9  -6   8   13.39   27.62
  10  -6   8   14.00   28.90
  11  -6   8   41.63   13.78
  12  -6   8   51.15   13.60
  13  -6   8    0.53   35.64
  14  -6   8   25.01   31.88
 -11  -6   7  -17.56   33.23
 -10  -6   7   -7.88   29.89
  -9  -6   7   75.84   14.32
  -8  -6   7  120.90   13.62
  -7  -6   7    1.11   28.25
  -6  -6   7   16.46   13.13
  -5  -6   7  341.63   29.03
  -4  -6   7   66.84   10.79
  -3  -6   7    1.28   22.27
  -2  -6   7  122.33   11.15
  -1  -6   7 1215.59   32.17
   0  -6   7   56.75    9.01
   1  -6   7   71.59    9.51
   2  -6   7  119.66   10.82
   3  -6   7   98.85    9.95
   4  -6   7  413.58   24.63
   5  -6   7   28.37   22.71
   6  -6   7  114.04   11.11
   7  -6   7   16.65   23.88
   8  -6   7    5.41   27.35
   9  -6   7  155.24   13.28
  10  -6   7  -15.06   29.61
  11  -6   7  -63.30   32.17
  12  -6   7   20.79   30.29
  13  -6   7  -40.61   32.98
  14  -6   7  -34.46   34.26
 -12  -6   6   -9.29   33.36
 -11  -6   6  -26.07   33.32
 -10  -6   6    7.29   30.77
  -9  -6   6  216.44   19.42
  -8  -6   6    4.38   28.97
  -7  -6   6   83.51   12.63
  -6  -6   6  347.86   28.55
  -5  -6   6   37.50   10.56
  -4  -6   6    4.90   22.49
  -3  -6   6 1217.90   32.08
  -2  -6   6   71.50    9.19
  -1  -6   6  358.58   23.82
   0  -6   6  -41.77   19.94
   1  -6   6  224.06   21.70
   2  -6   6  -11.50   19.46
   3  -6   6  135.06   12.21
   4  -6   6    4.84   20.18
   5  -6   6   94.60    9.85
   6  -6   6  120.35   12.03
   7  -6   6  -11.10   25.05
   8  -6   6   61.42   12.14
   9  -6   6   25.75   12.73
  10  -6   6   19.39   15.34
  11  -6   6    2.09   31.46
  12  -6   6   -0.91   30.99
  13  -6   6    6.13   31.49
  14  -6   6  -26.03   32.47
 -13  -6   5   -1.96   34.94
 -12  -6   5   33.80   22.97
 -11  -6   5   28.65   31.77
 -10  -6   5   29.98   30.94
  -9  -6   5   92.93   13.23
  -8  -6   5   18.84   19.55
  -7  -6   5  -13.25   26.22
  -6  -6   5  187.24   15.65
  -5  -6   5    9.94   23.51
  -4  -6   5  496.70   25.50
  -3  -6   5  -26.57   20.03
  -2  -6   5  240.84   20.76
  -1  -6   5  348.40   20.79
   0  -6   5  181.87   14.08
   1  -6   5  301.82   19.96
   2  -6   5   37.22    8.17
   3  -6   5   -7.91   20.06
   4  -6   5   13.99   11.64
   5  -6   5   10.07   20.62
   6  -6   5   62.52   10.22
   7  -6   5   56.14   11.19
   8  -6   5   52.38   12.25
   9  -6   5  114.53   13.21
  10  -6   5  394.52   33.99
  11  -6   5    9.57   21.19
  12  -6   5  -14.30   30.98
  13  -6   5   25.40   30.43
  14  -6   5  -12.30   32.94
 -13  -6   4   -5.69   33.54
 -12  -6   4  -16.81   34.71
 -11  -6   4    1.49   30.58
 -10  -6   4  211.24   19.48
  -9  -6   4  129.93   13.41
  -8  -6   4   10.92   27.44
  -7  -6   4  109.42   11.71
  -6  -6   4  248.56   17.38
  -5  -6   4   44.93    9.56
  -4  -6   4  692.87   26.89
  -3  -6   4    8.00    9.05
  -2  -6   4  844.15   25.18
  -1  -6   4   -4.55   17.03
   0  -6   4   -2.10   17.29
   1  -6   4  -27.47   17.85
   2  -6   4   24.09   18.09
   3  -6   4   17.26   17.57
   4  -6   4  275.36   21.73
   5  -6   4   94.53    9.51
   6  -6   4   -1.91   22.32
   7  -6   4   61.59   10.81
   8  -6   4   48.52   12.35
   9  -6   4   52.30   12.97
  10  -6   4   15.91   30.32
  11  -6   4  -63.53   32.53
  12  -6   4  -29.52   31.71
  13  -6   4   41.04   33.78
 -14  -6   3  -12.05   34.76
 -13  -6   3   15.67   32.86
 -12  -6   3  -76.97   34.45
 -11  -6   3   32.26   13.79
 -10  -6   3  -39.73   30.16
  -9  -6   3    4.33   27.05
  -8  -6   3   36.74   24.50
  -7  -6   3  310.30   27.02
  -6  -6   3   82.77    9.76
  -5  -6   3  179.90   14.72
  -4  -6   3  718.88   24.65
  -3  -6   3   24.65    7.62
  -2  -6   3   43.02    7.59
  -1  -6   3   -3.20   16.88
   0  -6   3    9.22   16.41
   1  -6   3  368.56   20.21
   2  -6   3    0.60   18.31
   3  -6   3  193.08   13.99
   4  -6   3  571.24   23.09
   5  -6   3   26.76   21.32
   6  -6   3  106.50   10.43
   7  -6   3  305.76   27.33
   8  -6   3   60.72   12.38
   9  -6   3  102.18   12.94
  10  -6   3  181.50   17.76
  11  -6   3   35.64   14.05
  12  -6   3   -7.14   31.13
  13  -6   3   -1.74   32.28
 -14  -6   2   24.31   19.50
 -13  -6   2  -15.94   33.91
 -12  -6   2   14.92   29.62
 -11  -6   2   12.06   30.01
 -10  -6   2   37.27   28.00
  -9  -6   2   21.67   15.18
  -8  -6   2  162.80   15.68
  -7  -6   2  182.29   14.64
  -6  -6   2   22.43    8.83
  -5  -6   2  160.78   14.53
  -4  -6   2   50.02    7.85
  -3  -6   2  773.71   22.36
  -2  -6   2  103.76    9.96
  -1  -6   2  775.43   22.69
   0  -6   2   91.57    8.79
   1  -6   2  -10.47   16.86
   2  -6   2  520.23   21.76
   3  -6   2   13.85    7.89
   4  -6   2  675.67   25.37
   5  -6   2  636.91   27.51
   6  -6   2 1632.20   37.14
   7  -6   2   82.52   11.61
   8  -6   2   -2.57   26.37
   9  -6   2   12.79   29.09
  10  -6   2   -3.46   29.69
  11  -6   2   29.64   30.02
  12  -6   2   11.14   31.50
  13  -6   2  -21.77   34.74
 -14  -6   1  -18.17   35.10
 -13  -6   1   58.94   14.48
 -12  -6   1    9.13   31.55
 -11  -6   1    7.83   31.30
 -10  -6   1   41.94   12.53
  -9  -6   1  -32.22   27.38
  -8  -6   1  139.18   12.82
  -7  -6   1  134.34   13.16
  -6  -6   1   77.46    9.09
  -5  -6   1 1028.35   27.89
  -4  -6   1   13.61   17.57
  -3  -6   1  552.66   21.98
  -2  -6   1   17.55    7.55
  -1  -6   1   -8.10   17.26
   0  -6   1  -20.19   16.40
   1  -6   1   -8.65   16.95
   2  -6   1  987.95   23.87
   3  -6   1  299.86   20.26
   4  -6   1 1126.39   28.93
   5  -6   1  -10.00   21.51
   6  -6   1   61.70   10.33
   7  -6   1   -7.38   24.53
   8  -6   1   25.54   11.53
   9  -6   1   65.76   12.88
  10  -6   1   13.01   19.84
  11  -6   1   19.39   29.49
  12  -6   1   26.96   31.29
  13  -6   1  -31.51   33.15
 -15  -6   0   13.62   36.08
 -14  -6   0   18.02   31.84
 -13  -6   0   -6.60   32.65
 -12  -6   0  -35.35   31.92
 -11  -6   0    1.32   29.27
 -10  -6   0   29.85   26.20
  -9  -6   0   81.11   12.10
  -8  -6   0    9.65   22.89
  -7  -6   0   53.83    9.68
  -6  -6   0   46.47    8.65
  -5  -6   0   16.55   17.91
  -4  -6   0  -42.15   17.55
  -3  -6   0   41.72    7.64
  -2  -6   0    5.44   11.43
  -1  -6   0   57.45    7.44
   0  -6   0   11.14   16.40
   1  -6   0  434.71   20.14
   2  -6   0    3.25   17.51
   3  -6   0  -14.32   18.25
   4  -6   0  247.12   21.30
   5  -6   0  365.95   24.95
   6  -6   0  258.54   18.65
   7  -6   0  336.82   28.47
   8  -6   0   33.06   27.66
   9  -6   0  -24.27   28.70
  10  -6   0   -2.06   28.71
  11  -6   0   43.19   30.17
  12  -6   0   -6.01   31.86
  13  -6   0   21.63   32.05
 -15  -6  -1   39.57   33.63
 -14  -6  -1   72.10   15.30
 -13  -6  -1   18.63   32.78
 -12  -6  -1   23.16   17.61
 -11  -6  -1  122.62   13.70
 -10  -6  -1   49.19   12.41
  -9  -6  -1   23.94   25.28
  -8  -6  -1   89.99   10.70
  -7  -6  -1   69.58    9.51
  -6  -6  -1  103.23    9.99
  -5  -6  -1   91.15    8.27
  -4  -6  -1   52.74    7.83
  -3  -6  -1  -19.08   16.28
  -2  -6  -1   14.31    7.41
  -1  -6  -1   44.91    7.58
   0  -6  -1   30.53    7.42
   1  -6  -1  115.71    9.97
   2  -6  -1  725.14   23.97
   3  -6  -1  673.72   24.16
   4  -6  -1  121.69   11.97
   5  -6  -1  299.48   24.79
   6  -6  -1   65.32   10.39
   7  -6  -1   30.32   24.73
   8  -6  -1    5.49   26.13
   9  -6  -1   27.36   27.80
  10  -6  -1   27.28   29.45
  11  -6  -1  -15.69   31.17
  12  -6  -1   -8.37   33.70
 -15  -6  -2   31.61   32.76
 -14  -6  -2   -7.61   33.67
 -13  -6  -2   29.60   30.92
 -12  -6  -2   24.94   28.90
 -11  -6  -2   31.55   28.06
 -10  -6  -2    3.48   27.33
  -9  -6  -2  117.31   11.71
  -8  -6  -2  -14.36   23.62
  -7  -6  -2  127.13   11.90
  -6  -6  -2  220.92   19.99
  -5  -6  -2   48.47    7.89
  -4  -6  -2    0.04   16.67
  -3  -6  -2  -16.66   16.79
  -2  -6  -2  123.93   11.97
  -1  -6  -2  202.92   18.84
   0  -6  -2   22.85   18.50
   1  -6  -2   22.86   17.10
   2  -6  -2  602.31   22.22
   3  -6  -2  196.44   15.01
   4  -6  -2   85.00    9.33
   5  -6  -2    3.62   21.64
   6  -6  -2  161.98   14.84
   7  -6  -2   54.27   11.96
   8  -6  -2   20.00   26.85
   9  -6  -2  114.73   13.32
  10  -6  -2  -33.31   30.50
  11  -6  -2   11.94   31.85
  12  -6  -2   25.28   23.08
 -15  -6  -3    7.78   33.11
 -14  -6  -3   14.42   30.74
 -13  -6  -3    1.75   31.39
 -12  -6  -3   43.68   30.66
 -11  -6  -3    0.00   29.98
 -10  -6  -3  218.83   17.05
  -9  -6  -3   29.85   24.48
  -8  -6  -3   79.41   10.57
  -7  -6  -3  463.85   25.06
  -6  -6  -3  124.62   11.84
  -5  -6  -3  -20.24   17.66
  -4  -6  -3  146.00   13.20
  -3  -6  -3 1054.37   24.54
  -2  -6  -3   74.33    7.64
  -1  -6  -3    6.40   16.33
   0  -6  -3  319.29   19.54
   1  -6  -3  296.32   19.22
   2  -6  -3  143.39   13.46
   3  -6  -3   17.32    8.24
   4  -6  -3 1114.12   31.58
   5  -6  -3   52.62   10.48
   6  -6  -3   24.28   24.82
   7  -6  -3  108.52   12.36
   8  -6  -3    9.47   27.74
   9  -6  -3    6.75   29.03
  10  -6  -3    7.57   31.55
  11  -6  -3  -13.31   34.87
  12  -6  -3   17.94   32.03
 -15  -6  -4   -1.85   36.26
 -14  -6  -4   -8.23   32.57
 -13  -6  -4   -2.36   30.43
 -12  -6  -4  169.17   15.95
 -11  -6  -4   36.54   28.31
 -10  -6  -4   -2.91   27.28
  -9  -6  -4  147.33   13.17
  -8  -6  -4  315.51   25.30
  -7  -6  -4   73.97    9.42
  -6  -6  -4    6.65   19.62
  -5  -6  -4   48.79    8.23
  -4  -6  -4  148.16   13.56
  -3  -6  -4   60.75    7.68
  -2  -6  -4  130.75   12.88
  -1  -6  -4   64.13    7.51
   0  -6  -4    3.50   16.83
   1  -6  -4   25.21    7.77
   2  -6  -4  157.64   14.70
   3  -6  -4   10.50   19.43
   4  -6  -4  224.96   17.42
   5  -6  -4    6.74   23.92
   6  -6  -4  -36.84   25.95
   7  -6  -4   60.14   12.46
   8  -6  -4  -20.84   30.11
   9  -6  -4    2.71   31.03
  10  -6  -4   39.46   31.06
  11  -6  -4   30.53   14.88
 -16  -6  -5    4.56   33.06
 -15  -6  -5   16.05   18.80
 -14  -6  -5  -27.43   31.27
 -13  -6  -5   -8.13   30.66
 -12  -6  -5   33.34   28.28
 -11  -6  -5   -0.84   28.92
 -10  -6  -5   44.10   12.35
  -9  -6  -5  -44.83   26.12
  -8  -6  -5  737.34   29.87
  -7  -6  -5  221.02   16.09
  -6  -6  -5  448.49   23.49
  -5  -6  -5 1141.23   27.23
  -4  -6  -5   71.22    7.96
  -3  -6  -5   52.03    7.61
  -2  -6  -5   -6.51   16.96
  -1  -6  -5   17.51   16.53
   0  -6  -5  363.77   20.94
   1  -6  -5  164.41   13.95
   2  -6  -5  172.77   14.59
   3  -6  -5  163.75   15.16
   4  -6  -5   32.70    9.94
   5  -6  -5   67.32   11.17
   6  -6  -5   36.01   28.00
   7  -6  -5   26.86   27.68
   8  -6  -5  128.09   13.40
   9  -6  -5  -12.10   29.79
  10  -6  -5   46.72   13.82
  11  -6  -5   21.08   31.41
 -16  -6  -6   33.76   35.43
 -15  -6  -6   28.29   19.21
 -14  -6  -6   41.69   30.68
 -13  -6  -6   -3.21   31.75
 -12  -6  -6   15.23   29.19
 -11  -6  -6   84.17   13.39
 -10  -6  -6  111.79   12.61
  -9  -6  -6   37.40   25.15
  -8  -6  -6  132.14   12.43
  -7  -6  -6  223.85   22.34
  -6  -6  -6  111.61    9.63
  -5  -6  -6  134.25   11.66
  -4  -6  -6    7.05   13.08
  -3  -6  -6    6.91   12.31
  -2  -6  -6  223.57   20.67
  -1  -6  -6   63.43    8.53
   0  -6  -6  814.96   25.60
   1  -6  -6  159.87   12.27
   2  -6  -6   14.96   19.25
   3  -6  -6  331.61   24.94
   4  -6  -6   36.13   10.97
   5  -6  -6  113.92   11.73
   6  -6  -6  -15.19   29.14
   7  -6  -6   -8.38   28.52
   8  -6  -6   37.75   28.71
   9  -6  -6   14.08   21.15
  10  -6  -6   10.61   32.64
 -16  -6  -7   24.19   32.36
 -15  -6  -7   22.58   32.85
 -14  -6  -7   12.92   31.97
 -13  -6  -7  -35.22   32.47
 -12  -6  -7  -24.36   30.84
 -11  -6  -7   55.01   13.26
 -10  -6  -7   66.90   12.79
  -9  -6  -7  227.87   20.08
  -8  -6  -7  134.26   12.69
  -7  -6  -7   26.59   21.62
  -6  -6  -7   98.91    9.94
  -5  -6  -7  380.56   23.03
  -4  -6  -7  329.07   23.25
  -3  -6  -7   10.47   19.87
  -2  -6  -7   -3.79   18.61
  -1  -6  -7  441.00   23.78
   0  -6  -7  203.10   15.08
   1  -6  -7   24.40   21.39
   2  -6  -7   13.40   22.05
   3  -6  -7   13.78   13.43
   4  -6  -7   46.72   11.35
   5  -6  -7   20.08   26.02
   6  -6  -7    3.66   27.56
   7  -6  -7   31.34   30.91
   8  -6  -7   43.71   29.21
   9  -6  -7   63.69   13.92
  10  -6  -7   28.34   31.91
 -16  -6  -8   43.90   33.29
 -15  -6  -8   -9.11   33.69
 -14  -6  -8  -29.35   32.59
 -13  -6  -8   19.79   30.85
 -12  -6  -8  111.45   13.95
 -11  -6  -8  -21.47   31.04
 -10  -6  -8   34.46   26.86
  -9  -6  -8   64.97   11.92
  -8  -6  -8  200.06   19.02
  -7  -6  -8   62.64   10.82
  -6  -6  -8   21.17   21.75
  -5  -6  -8  709.10   28.33
  -4  -6  -8  178.86   15.82
  -3  -6  -8  300.99   23.40
  -2  -6  -8  163.20   12.72
  -1  -6  -8  299.88   24.02
   0  -6  -8  270.04   17.66
   1  -6  -8  178.00   13.91
   2  -6  -8  241.36   19.01
   3  -6  -8   16.78   14.17
   4  -6  -8    8.55   18.32
   5  -6  -8  117.33   12.80
   6  -6  -8   31.31   12.63
   7  -6  -8   30.50   29.78
   8  -6  -8  -20.43   31.25
   9  -6  -8   20.85   33.43
 -16  -6  -9   -6.10   35.41
 -15  -6  -9  -51.54   34.01
 -14  -6  -9   67.11   14.36
 -13  -6  -9   48.14   13.97
 -12  -6  -9    5.69   31.41
 -11  -6  -9    7.94   29.93
 -10  -6  -9   20.43   29.17
  -9  -6  -9   -6.54   27.13
  -8  -6  -9  100.25   11.85
  -7  -6  -9  188.72   14.86
  -6  -6  -9  135.60   11.95
  -5  -6  -9   90.96   10.48
  -4  -6  -9   78.29    9.85
  -3  -6  -9   14.99   22.15
  -2  -6  -9  -11.12   22.23
  -1  -6  -9  228.77   17.84
   0  -6  -9  150.60   13.92
   1  -6  -9   62.97   10.72
   2  -6  -9   37.36   25.99
   3  -6  -9   18.26   25.06
   4  -6  -9   18.45   26.15
   5  -6  -9   27.62   11.97
   6  -6  -9   41.30   28.07
   7  -6  -9  -42.93   30.95
   8  -6  -9   13.10   22.30
 -15  -6 -10  -15.79   34.98
 -14  -6 -10   44.56   32.61
 -13  -6 -10   34.63   32.41
 -12  -6 -10    3.41   30.72
 -11  -6 -10  158.78   15.87
 -10  -6 -10   31.15   27.70
  -9  -6 -10   -3.96   27.76
  -8  -6 -10   35.95   11.65
  -7  -6 -10  100.12   12.14
  -6  -6 -10   87.38   11.45
  -5  -6 -10  -22.29   24.76
  -4  -6 -10  200.15   17.69
  -3  -6 -10   24.95   24.67
  -2  -6 -10   30.22   22.83
  -1  -6 -10  344.30   28.55
   0  -6 -10   26.77   24.75
   1  -6 -10   24.15   24.29
   2  -6 -10   30.89   25.23
   3  -6 -10  119.09   12.51
   4  -6 -10  -27.07   27.41
   5  -6 -10  -45.50   28.94
   6  -6 -10    5.66   29.53
   7  -6 -10    8.63   31.86
   8  -6 -10   16.72   32.16
 -15  -6 -11   46.95   33.08
 -14  -6 -11  -28.29   33.68
 -13  -6 -11   18.09   30.58
 -12  -6 -11   23.57   30.66
 -11  -6 -11   23.91   28.57
 -10  -6 -11    4.53   28.82
  -9  -6 -11   53.98   13.10
  -8  -6 -11   90.05   12.97
  -7  -6 -11   -6.30   27.18
  -6  -6 -11  587.46   31.94
  -5  -6 -11   98.55   11.71
  -4  -6 -11   39.15   11.28
  -3  -6 -11  111.58   11.73
  -2  -6 -11  340.98   28.91
  -1  -6 -11   11.39   26.92
   0  -6 -11   23.92   25.55
   1  -6 -11  224.12   19.79
   2  -6 -11   13.95   26.59
   3  -6 -11    8.40   29.25
   4  -6 -11   35.58   28.80
   5  -6 -11  -13.43   28.48
   6  -6 -11   34.31   12.94
   7  -6 -11  -36.21   33.87
 -15  -6 -12  -22.81   34.03
 -14  -6 -12   40.77   33.60
 -13  -6 -12   14.20   30.90
 -12  -6 -12    4.18   29.79
 -11  -6 -12   16.30   30.61
 -10  -6 -12  151.82   14.06
  -9  -6 -12   77.44   13.28
  -8  -6 -12  162.75   15.25
  -7  -6 -12    9.26   28.20
  -6  -6 -12   28.78   27.62
  -5  -6 -12   34.62   29.40
  -4  -6 -12   11.55   27.56
  -3  -6 -12   25.46   26.24
  -2  -6 -12  100.56   12.91
  -1  -6 -12  -21.22   27.01
   0  -6 -12  119.02   12.96
   1  -6 -12    2.51   27.72
   2  -6 -12    2.67   29.73
   3  -6 -12  -19.31   30.57
   4  -6 -12    6.76   28.03
   5  -6 -12  -19.56   29.90
   6  -6 -12    8.05   32.10
 -15  -6 -13  -51.29   36.39
 -14  -6 -13   16.69   36.10
 -13  -6 -13  -37.82   33.44
 -12  -6 -13   -0.17   31.24
 -11  -6 -13   -4.51   30.03
 -10  -6 -13    1.44   30.18
  -9  -6 -13   28.46   29.86
  -8  -6 -13   36.62   29.46
  -7  -6 -13  323.66   21.93
  -6  -6 -13  228.47   22.33
  -5  -6 -13  160.52   14.95
  -4  -6 -13  -11.48   27.67
  -3  -6 -13   87.22   12.86
  -2  -6 -13  143.83   13.33
  -1  -6 -13  147.37   13.43
   0  -6 -13  -12.63   29.09
   1  -6 -13   16.83   27.85
   2  -6 -13  144.44   13.73
   3  -6 -13   13.15   29.65
   4  -6 -13   39.50   28.80
   5  -6 -13   18.35   30.76
 -14  -6 -14   -9.06   36.03
 -13  -6 -14   -7.93   33.71
 -12  -6 -14    1.93   33.79
 -11  -6 -14  -11.89   30.88
 -10  -6 -14   44.41   13.61
  -9  -6 -14   -0.31   32.19
  -8  -6 -14    8.64   30.74
  -7  -6 -14    5.86   28.84
  -6  -6 -14  110.99   14.04
  -5  -6 -14    9.84   28.81
  -4  -6 -14   34.10   29.33
  -3  -6 -14   65.50   13.61
  -2  -6 -14   38.90   13.23
  -1  -6 -14  -40.46   29.62
   0  -6 -14   75.55   13.85
   1  -6 -14   23.98   28.18
   2  -6 -14   35.18   28.48
   3  -6 -14   18.46   30.30
   4  -6 -14   23.56   30.65
 -13  -6 -15   26.11   34.18
 -12  -6 -15   36.77   33.78
 -11  -6 -15   14.87   32.54
 -10  -6 -15   12.99   31.41
  -9  -6 -15   11.17   30.86
  -8  -6 -15  -61.16   33.11
  -7  -6 -15  -44.66   31.77
  -6  -6 -15  150.97   14.34
  -5  -6 -15   20.05   28.08
  -4  -6 -15   -8.33   32.39
  -3  -6 -15   28.81   30.65
  -2  -6 -15   -9.14   29.59
  -1  -6 -15  -28.56   30.26
   0  -6 -15  -11.56   28.57
   1  -6 -15   71.36   14.50
   2  -6 -15    4.01   33.26
   3  -6 -15   23.95   29.66
 -13  -6 -16   23.10   24.73
 -12  -6 -16  -12.19   32.25
 -11  -6 -16   66.20   14.70
 -10  -6 -16   25.78   31.44
  -9  -6 -16   15.77   30.93
  -8  -6 -16   69.04   14.60
  -7  -6 -16    9.01   31.30
  -6  -6 -16    1.49   31.80
  -5  -6 -16   -1.34   30.33
  -4  -6 -16   31.71   30.12
  -3  -6 -16   -6.80   30.07
  -2  -6 -16   25.45   30.47
  -1  -6 -16   94.12   14.95
   0  -6 -16   13.63   32.27
   1  -6 -16    1.64   34.19
   2  -6 -16    0.34   32.30
 -12  -6 -17    8.93   19.10
 -11  -6 -17   26.17   18.43
 -10  -6 -17    7.95   24.14
  -9  -6 -17   18.36   29.94
  -8  -6 -17  -11.99   32.25
  -7  -6 -17    0.76   31.44
  -6  -6 -17   25.82   21.31
  -5  -6 -17   -9.15   33.36
  -4  -6 -17   35.03   32.28
  -3  -6 -17   31.19   32.28
  -2  -6 -17   38.74   28.30
  -1  -6 -17   43.94   30.13
   0  -6 -17  -41.00   34.09
 -10  -6 -18   58.78   14.97
  -9  -6 -18  -12.88   34.71
  -8  -6 -18   18.07   32.94
  -7  -6 -18   38.96   33.50
  -6  -6 -18   37.05   31.29
  -5  -6 -18  -12.28   35.14
  -4  -6 -18   30.64   33.93
  -3  -6 -18   27.31   32.22
  -2  -6 -18   32.13   32.05
   1  -7  17    7.81   32.95
   2  -7  17   21.42   33.52
   3  -7  17   18.18   34.59
   4  -7  17   38.33   33.81
   5  -7  17  -81.63   37.63
   6  -7  17    8.10   33.85
   7  -7  17   -8.87   34.35
  -2  -7  16  -13.86   34.54
  -1  -7  16   16.71   33.20
   0  -7  16   95.40   14.88
   1  -7  16  -18.14   32.50
   2  -7  16    9.30   34.05
   3  -7  16   78.56   15.34
   4  -7  16   -4.76   35.97
   5  -7  16   86.72   15.10
   6  -7  16   34.78   30.85
   7  -7  16   33.72   32.48
   8  -7  16   14.88   16.78
   9  -7  16  -79.50   37.24
  -3  -7  15  -61.78   34.71
  -2  -7  15   86.41   14.98
  -1  -7  15  -32.39   34.82
   0  -7  15   35.62   32.80
   1  -7  15   37.72   13.98
   2  -7  15   43.82   13.98
   3  -7  15   -5.59   33.95
   4  -7  15   40.02   30.89
   5  -7  15   -8.97   31.26
   6  -7  15  -17.70   33.47
   7  -7  15  -23.83   31.95
   8  -7  15    9.06   33.76
   9  -7  15   28.25   14.92
  10  -7  15   -7.70   33.36
  -5  -7  14    1.47   32.95
  -4  -7  14   -1.52   32.54
  -3  -7  14   18.70   30.09
  -2  -7  14   -1.75   31.80
  -1  -7  14  -31.16   32.62
   0  -7  14  -19.85   30.64
   1  -7  14   36.08   30.49
   2  -7  14   24.25   30.64
   3  -7  14   11.00   30.92
   4  -7  14  100.82   14.26
   5  -7  14   41.77   14.17
   6  -7  14   38.79   30.90
   7  -7  14   71.09   14.12
   8  -7  14   91.91   14.96
   9  -7  14   28.31   30.47
  10  -7  14   40.78   31.71
  11  -7  14   37.72   33.06
  -6  -7  13   -5.50   32.77
  -5  -7  13   33.23   14.49
  -4  -7  13   93.95   14.44
  -3  -7  13  -33.97   30.82
  -2  -7  13    1.42   30.43
  -1  -7  13   64.20   13.11
   0  -7  13   18.18   20.65
   1  -7  13   15.67   13.11
   2  -7  13  112.40   13.56
   3  -7  13   62.28   13.60
   4  -7  13  -35.73   30.17
   5  -7  13   57.11   13.12
   6  -7  13   12.04   17.58
   7  -7  13   26.47   32.16
   8  -7  13   18.78   31.08
   9  -7  13  107.57   14.67
  10  -7  13   27.12   34.79
  11  -7  13   42.31   32.47
  -7  -7  12  -47.82   35.24
  -6  -7  12   -5.98   31.55
  -5  -7  12  -30.87   32.27
  -4  -7  12   -3.88   31.04
  -3  -7  12   44.04   13.30
  -2  -7  12   19.83   29.74
  -1  -7  12    9.71   20.49
   0  -7  12   -0.43   28.49
   1  -7  12   64.03   12.78
   2  -7  12  -33.43   29.43
   3  -7  12  -12.79   28.82
   4  -7  12   -8.16   30.06
   5  -7  12   60.70   13.35
   6  -7  12   25.69   28.49
   7  -7  12   84.67   13.51
   8  -7  12    7.05   30.37
   9  -7  12   31.82   31.96
  10  -7  12   -1.71   30.83
  11  -7  12  -77.22   33.41
  12  -7  12  -22.93   35.09
  -8  -7  11   28.95   13.62
  -7  -7  11   24.29   32.11
  -6  -7  11   14.46   28.39
  -5  -7  11    5.48   30.50
  -4  -7  11   70.94   13.64
  -3  -7  11   10.14   28.77
  -2  -7  11   21.42   19.69
  -1  -7  11   26.37   26.83
   0  -7  11   25.34   12.23
   1  -7  11   28.82   12.53
   2  -7  11  119.07   12.98
   3  -7  11   -7.06   28.47
   4  -7  11   69.01   12.88
   5  -7  11  101.09   13.08
   6  -7  11   -3.29   28.94
   7  -7  11  248.67   22.79
   8  -7  11   25.17   29.94
   9  -7  11  -65.39   32.39
  10  -7  11   96.76   14.30
  11  -7  11   29.07   30.74
  12  -7  11  -28.41   33.34
  -9  -7  10  -30.27   34.56
  -8  -7  10  -20.74   31.42
  -7  -7  10  -24.21   31.50
  -6  -7  10  -48.19   29.70
  -5  -7  10   12.29   29.27
  -4  -7  10   11.67   29.23
  -3  -7  10    6.64   27.88
  -2  -7  10  138.10   12.81
  -1  -7  10   -9.07   26.89
   0  -7  10   54.53   12.13
   1  -7  10   -2.00   26.17
   2  -7  10  144.32   13.82
   3  -7  10   33.58   11.54
   4  -7  10   -5.40   26.97
   5  -7  10   34.97   12.83
   6  -7  10  -11.68   28.29
   7  -7  10  -35.37   30.23
   8  -7  10  -23.38   29.70
   9  -7  10    7.79   29.52
  10  -7  10   15.49   28.85
  11  -7  10   67.04   14.26
  12  -7  10   22.31   33.28
  13  -7  10   17.52   14.39
 -10  -7   9  -30.56   33.78
  -9  -7   9  -36.02   32.29
  -8  -7   9   -6.13   31.03
  -7  -7   9   -7.23   29.74
  -6  -7   9   16.94   30.49
  -5  -7   9   27.76   26.99
  -4  -7   9    4.06   27.65
  -3  -7   9  -15.17   27.05
  -2  -7   9   20.90   24.20
  -1  -7   9   66.69   11.96
   0  -7   9   21.89   26.57
   1  -7   9  -25.64   25.37
   2  -7   9  201.34   19.55
   3  -7   9  167.87   15.57
   4  -7   9   30.31   24.90
   5  -7   9   28.21   26.00
   6  -7   9  162.04   14.38
   7  -7   9    1.33   28.19
   8  -7   9   -1.85   31.29
   9  -7   9  -21.89   30.38
  10  -7   9   12.63   29.00
  11  -7   9   12.73   32.86
  12  -7   9  -46.51   34.14
  13  -7   9   36.16   32.45
 -10  -7   8   66.13   14.49
  -9  -7   8  -16.76   30.69
  -8  -7   8   51.92   13.17
  -7  -7   8  111.40   13.65
  -6  -7   8  197.10   16.73
  -5  -7   8  -40.68   27.81
  -4  -7   8  -16.21   26.73
  -3  -7   8  358.21   29.78
  -2  -7   8   24.95   10.69
  -1  -7   8   40.45   10.65
   0  -7   8  292.46   26.49
   1  -7   8  134.45   12.22
   2  -7   8    6.70   23.59
   3  -7   8   32.94   22.98
   4  -7   8   30.76   24.72
   5  -7   8   -1.75   26.30
   6  -7   8   46.98   11.95
   7  -7   8  101.30   12.61
   8  -7   8  124.04   12.93
   9  -7   8   13.28   29.48
  10  -7   8  -10.14   29.40
  11  -7   8    2.73   32.12
  12  -7   8   10.33   30.86
  13  -7   8   30.20   33.28
 -11  -7   7  -31.49   35.00
 -10  -7   7   13.57   30.73
  -9  -7   7   12.34   30.70
  -8  -7   7   31.84   29.50
  -7  -7   7  -35.60   28.84
  -6  -7   7   -9.39   27.51
  -5  -7   7  189.55   16.05
  -4  -7   7   35.85   25.19
  -3  -7   7   90.46   10.80
  -2  -7   7  -24.83   22.72
  -1  -7   7   -3.16   22.05
   0  -7   7   69.74    9.92
   1  -7   7   -4.94   22.13
   2  -7   7    8.16   22.33
   3  -7   7  170.36   16.98
   4  -7   7  107.20   10.93
   5  -7   7   28.71   11.34
   6  -7   7    7.60   25.19
   7  -7   7   23.29   16.11
   8  -7   7   68.15   12.99
   9  -7   7   28.95   28.74
  10  -7   7  -26.04   30.81
  11  -7   7  -31.87   31.41
  12  -7   7   26.32   30.13
  13  -7   7    9.45   33.11
 -12  -7   6   78.26   15.53
 -11  -7   6  -27.64   33.09
 -10  -7   6   19.87   30.95
  -9  -7   6    8.92   28.97
  -8  -7   6  -53.53   29.25
  -7  -7   6    7.65   26.55
  -6  -7   6   28.92   29.06
  -5  -7   6  123.99   11.70
  -4  -7   6   31.84   22.70
  -3  -7   6    1.46   23.14
  -2  -7   6  237.48   16.99
  -1  -7   6   28.57   19.71
   0  -7   6   29.80    9.14
   1  -7   6   69.10    9.53
   2  -7   6  484.50   25.36
   3  -7   6  355.45   24.50
   4  -7   6   68.37   10.04
   5  -7   6   62.90   10.68
   6  -7   6   88.45   11.28
   7  -7   6   51.29   12.08
   8  -7   6  504.93   36.62
   9  -7   6   40.09   30.38
  10  -7   6   20.59   30.20
  11  -7   6   17.18   29.47
  12  -7   6   23.99   32.00
  13  -7   6   12.11   31.23
 -12  -7   5   12.22   32.52
 -11  -7   5   14.14   32.29
 -10  -7   5  200.67   19.43
  -9  -7   5    4.01   29.53
  -8  -7   5   29.38   19.62
  -7  -7   5   57.44   12.05
  -6  -7   5   24.04   11.32
  -5  -7   5    0.77   22.66
  -4  -7   5  481.26   26.61
  -3  -7   5   10.89   20.37
  -2  -7   5   75.11    9.09
  -1  -7   5   71.88    8.92
   0  -7   5  146.20   12.40
   1  -7   5   39.20    8.76
   2  -7   5   21.89   19.14
   3  -7   5  -17.37   20.70
   4  -7   5  -25.63   21.56
   5  -7   5   98.41   10.78
   6  -7   5   23.90   24.22
   7  -7   5   31.36   25.90
   8  -7   5  120.43   12.81
   9  -7   5  105.49   13.55
  10  -7   5   29.57   22.03
  11  -7   5   44.58   29.94
  12  -7   5  -33.72   33.22
  13  -7   5   -1.71   32.22
 -13  -7   4  -63.57   36.32
 -12  -7   4    1.01   31.76
 -11  -7   4   -4.08   32.93
 -10  -7   4   69.90   14.30
  -9  -7   4   99.52   13.02
  -8  -7   4  -17.98   26.80
  -7  -7   4   24.68   26.91
  -6  -7   4   -5.27   24.38
  -5  -7   4   25.00    9.98
  -4  -7   4   98.00    9.58
  -3  -7   4  128.98   12.49
  -2  -7   4   14.54   19.00
  -1  -7   4    8.98   10.60
   0  -7   4   24.63   18.25
   1  -7   4  403.52   22.49
   2  -7   4  255.62   21.19
   3  -7   4  404.46   24.67
   4  -7   4    5.95   21.80
   5  -7   4  -15.50   22.33
   6  -7   4  130.07   12.65
   7  -7   4    9.75   26.36
   8  -7   4  114.14   13.02
   9  -7   4  265.04   22.80
  10  -7   4   16.45   13.26
  11  -7   4  -17.93   28.85
  12  -7   4   33.26   31.12
  13  -7   4   40.20   32.97
 -13  -7   3   12.99   23.08
 -12  -7   3  -42.21   32.66
 -11  -7   3  -93.63   33.49
 -10  -7   3   63.52   13.10
  -9  -7   3  -20.76   27.79
  -8  -7   3  144.05   12.74
  -7  -7   3   11.21   25.15
  -6  -7   3  239.65   17.69
  -5  -7   3  267.05   23.31
  -4  -7   3   20.39   19.10
  -3  -7   3  223.60   21.04
  -2  -7   3   19.40    8.15
  -1  -7   3  135.93   13.02
   0  -7   3   21.76   16.64
   1  -7   3  336.86   20.37
   2  -7   3   13.35   18.16
   3  -7   3  246.85   21.50
   4  -7   3   57.59    9.30
   5  -7   3  188.16   17.11
   6  -7   3  218.54   18.05
   7  -7   3  204.85   19.30
   8  -7   3   95.26   12.67
   9  -7   3   33.60   29.35
  10  -7   3   59.05   13.57
  11  -7   3  -14.09   31.69
  12  -7   3   37.72   30.29
  13  -7   3   -9.38   33.62
 -14  -7   2  -38.02   36.34
 -13  -7   2   29.60   32.71
 -12  -7   2  -11.94   31.01
 -11  -7   2   39.42   30.12
 -10  -7   2  -18.46   29.42
  -9  -7   2   24.56   26.58
  -8  -7   2  194.73   16.40
  -7  -7   2   39.36   10.86
  -6  -7   2   13.15   22.15
  -5  -7   2  258.34   23.44
  -4  -7   2   21.72   18.33
  -3  -7   2   99.65    9.48
  -2  -7   2  304.20   19.65
  -1  -7   2  168.37   13.81
   0  -7   2  -24.91   17.15
   1  -7   2  112.95   10.59
   2  -7   2  541.41   23.85
   3  -7   2   79.21    8.79
   4  -7   2   98.91    9.44
   5  -7   2    6.14   24.22
   6  -7   2   19.47   17.29
   7  -7   2  219.83   20.36
   8  -7   2    7.24   27.24
   9  -7   2   18.68   27.22
  10  -7   2   26.72   29.00
  11  -7   2    9.24   29.85
  12  -7   2  -20.38   32.97
  13  -7   2   -2.53   33.25
 -14  -7   1  -25.41   35.81
 -13  -7   1   31.31   33.06
 -12  -7   1   26.63   31.07
 -11  -7   1   -9.90   28.97
 -10  -7   1   -0.21   27.73
  -9  -7   1   29.72   26.40
  -8  -7   1   77.37   11.44
  -7  -7   1  133.20   12.85
  -6  -7   1   43.06    9.33
  -5  -7   1   73.95    9.20
  -4  -7   1  403.66   21.74
  -3  -7   1   69.19    8.01
  -2  -7   1   10.88   17.33
  -1  -7   1   83.83    8.01
   0  -7   1  353.71   20.42
   1  -7   1  300.13   21.01
   2  -7   1  -18.54   18.02
   3  -7   1  362.61   22.86
   4  -7   1   27.91    9.11
   5  -7   1  434.84   25.18
   6  -7   1   48.33   11.35
   7  -7   1    4.41   26.22
   8  -7   1  -24.83   28.47
   9  -7   1  -26.93   29.50
  10  -7   1   31.84   13.38
  11  -7   1   -3.69   21.86
  12  -7   1   11.87   22.57
 -14  -7   0   29.74   32.93
 -13  -7   0   23.68   32.90
 -12  -7   0   65.31   14.00
 -11  -7   0  -52.82   31.13
 -10  -7   0   -6.30   28.27
  -9  -7   0  247.18   20.69
  -8  -7   0   38.13   11.01
  -7  -7   0   10.54   21.98
  -6  -7   0  532.90   25.89
  -5  -7   0  101.21    9.87
  -4  -7   0   -4.62   17.90
  -3  -7   0  218.62   14.07
  -2  -7   0    7.34   16.28
  -1  -7   0   23.79   16.91
   0  -7   0   56.66    7.66
   1  -7   0   47.44    7.91
   2  -7   0  391.50   21.30
   3  -7   0  456.08   22.90
   4  -7   0   76.76    9.54
   5  -7   0   19.06   10.21
   6  -7   0   30.21   25.16
   7  -7   0  142.74   12.74
   8  -7   0   -3.71   27.01
   9  -7   0   10.91   29.70
  10  -7   0  -14.28   30.05
  11  -7   0  -14.94   32.83
  12  -7   0    0.48   31.55
 -15  -7  -1   10.07   35.98
 -14  -7  -1    2.34   34.50
 -13  -7  -1   19.23   31.51
 -12  -7  -1   46.01   30.96
 -11  -7  -1   22.24   28.13
 -10  -7  -1   10.42   28.09
  -9  -7  -1   13.72   26.00
  -8  -7  -1   39.98   10.65
  -7  -7  -1  -15.75   22.21
  -6  -7  -1   12.58   19.78
  -5  -7  -1  742.50   25.33
  -4  -7  -1   45.20    8.07
  -3  -7  -1  186.24   17.72
  -2  -7  -1  -19.76   16.79
  -1  -7  -1   59.39    7.63
   0  -7  -1  106.68   10.23
   1  -7  -1  280.41   20.54
   2  -7  -1  219.95   15.27
   3  -7  -1   -7.51   19.16
   4  -7  -1  396.05   24.86
   5  -7  -1   74.62   10.13
   6  -7  -1   62.53   11.77
   7  -7  -1   39.87   11.94
   8  -7  -1   40.04   28.24
   9  -7  -1  -48.10   31.36
  10  -7  -1   18.36   28.63
  11  -7  -1   35.37   30.80
  12  -7  -1    7.64   31.42
 -15  -7  -2  -44.25   34.21
 -14  -7  -2   25.94   32.93
 -13  -7  -2  -15.79   32.24
 -12  -7  -2   93.51   14.46
 -11  -7  -2  -39.37   30.81
 -10  -7  -2   27.17   27.81
  -9  -7  -2   70.89   11.94
  -8  -7  -2  142.61   12.38
  -7  -7  -2   37.40    9.57
  -6  -7  -2   45.00    8.97
  -5  -7  -2  -11.45   18.63
  -4  -7  -2  139.93   13.26
  -3  -7  -2  109.86   10.16
  -2  -7  -2   -1.47   17.26
  -1  -7  -2  142.12   12.80
   0  -7  -2  214.18   13.52
   1  -7  -2  152.05   13.42
   2  -7  -2  755.82   26.11
   3  -7  -2  172.35   15.36
   4  -7  -2   16.35   21.25
   5  -7  -2   23.53   23.30
   6  -7  -2  276.78   19.58
   7  -7  -2   -1.25   26.68
   8  -7  -2   38.37   26.93
   9  -7  -2    6.62   29.08
  10  -7  -2   -9.85   30.94
  11  -7  -2    3.76   30.51
  12  -7  -2   15.69   33.23
 -15  -7  -3   46.06   31.84
 -14  -7  -3   26.44   18.37
 -13  -7  -3   31.35   14.10
 -12  -7  -3   26.21   29.79
 -11  -7  -3  -20.05   28.72
 -10  -7  -3  217.69   21.13
  -9  -7  -3   -8.22   25.92
  -8  -7  -3   -0.49   24.36
  -7  -7  -3  168.07   13.39
  -6  -7  -3    8.35   19.59
  -5  -7  -3  -15.98   19.45
  -4  -7  -3  118.13   10.64
  -3  -7  -3   -2.17   17.51
  -2  -7  -3  338.63   20.62
  -1  -7  -3   54.35    7.82
   0  -7  -3   18.53   17.89
   1  -7  -3  122.99   10.59
   2  -7  -3   14.84   18.94
   3  -7  -3  132.52   12.28
   4  -7  -3   54.94   10.07
   5  -7  -3  232.92   18.91
   6  -7  -3   17.71   26.76
   7  -7  -3    7.55   12.11
   8  -7  -3   38.57   27.65
   9  -7  -3    0.81   28.19
  10  -7  -3  -28.24   32.30
  11  -7  -3   15.04   33.73
 -15  -7  -4  -10.30   35.08
 -14  -7  -4   15.11   31.85
 -13  -7  -4   29.57   22.93
 -12  -7  -4   -4.41   31.45
 -11  -7  -4    9.12   28.82
 -10  -7  -4  -52.90   29.31
  -9  -7  -4   87.68   11.88
  -8  -7  -4   35.45   10.67
  -7  -7  -4  294.91   25.57
  -6  -7  -4   -9.30   20.26
  -5  -7  -4   51.03    8.41
  -4  -7  -4    9.77   18.46
  -3  -7  -4  277.80   20.72
  -2  -7  -4  198.58   13.81
  -1  -7  -4  316.28   20.06
   0  -7  -4  391.37   21.66
   1  -7  -4   26.50   20.41
   2  -7  -4   84.64    9.41
   3  -7  -4  451.69   25.75
   4  -7  -4   51.33   10.68
   5  -7  -4   22.73   24.89
   6  -7  -4   53.15   12.30
   7  -7  -4  129.83   12.96
   8  -7  -4  -31.08   30.18
   9  -7  -4   27.08   28.86
  10  -7  -4   23.66   32.96
  11  -7  -4  -32.49   35.21
 -15  -7  -5   20.99   23.39
 -14  -7  -5    6.84   32.90
 -13  -7  -5  -13.99   33.62
 -12  -7  -5   33.81   29.66
 -11  -7  -5  160.24   15.12
 -10  -7  -5   86.15   12.73
  -9  -7  -5  169.26   15.76
  -8  -7  -5  707.52   30.09
  -7  -7  -5   40.02    9.94
  -6  -7  -5   22.30   20.72
  -5  -7  -5   60.95    9.01
  -4  -7  -5   37.09    8.47
  -3  -7  -5   45.42    8.19
  -2  -7  -5   24.48    8.10
  -1  -7  -5   17.55   12.98
   0  -7  -5  130.38   11.72
   1  -7  -5  139.91   10.75
   2  -7  -5   72.25   10.02
   3  -7  -5  -26.99   23.34
   4  -7  -5   -3.09   24.62
   5  -7  -5   50.85   11.71
   6  -7  -5   74.18   12.61
   7  -7  -5    9.68   28.91
   8  -7  -5   31.34   20.94
   9  -7  -5   25.51   28.82
  10  -7  -5   24.89   31.34
 -15  -7  -6  -21.65   33.18
 -14  -7  -6   18.02   31.98
 -13  -7  -6  -18.70   31.26
 -12  -7  -6   26.30   20.65
 -11  -7  -6  113.80   13.64
 -10  -7  -6    8.80   27.56
  -9  -7  -6   27.50   26.67
  -8  -7  -6   -0.20   25.36
  -7  -7  -6   -4.42   22.58
  -6  -7  -6  217.65   16.43
  -5  -7  -6   52.15    9.12
  -4  -7  -6   84.91    8.93
  -3  -7  -6  146.29   14.41
  -2  -7  -6   26.40   19.19
  -1  -7  -6  604.15   24.56
   0  -7  -6    4.57   19.33
   1  -7  -6    3.24   21.47
   2  -7  -6  291.03   24.61
   3  -7  -6  -25.94   25.15
   4  -7  -6   93.73   11.64
   5  -7  -6   31.83   11.59
   6  -7  -6   81.03   12.46
   7  -7  -6    1.98   29.41
   8  -7  -6   12.22   29.40
   9  -7  -6  -10.68   31.62
  10  -7  -6   13.36   32.41
 -15  -7  -7   29.34   32.57
 -14  -7  -7    3.98   33.15
 -13  -7  -7    8.74   30.88
 -12  -7  -7  -15.18   30.46
 -11  -7  -7   57.85   12.94
 -10  -7  -7  225.06   17.61
  -9  -7  -7   49.63   12.08
  -8  -7  -7   36.02   25.39
  -7  -7  -7  106.47   10.95
  -6  -7  -7   15.91   21.87
  -5  -7  -7   24.94    9.69
  -4  -7  -7  103.01    9.70
  -3  -7  -7  698.44   26.79
  -2  -7  -7  304.73   23.03
  -1  -7  -7  899.35   30.63
   0  -7  -7   98.47   10.22
   1  -7  -7    3.33   22.47
   2  -7  -7   79.30   10.67
   3  -7  -7    1.43   25.20
   4  -7  -7  100.95   11.63
   5  -7  -7   10.26   26.56
   6  -7  -7   26.75   27.14
   7  -7  -7   51.59   13.40
   8  -7  -7   28.70   31.01
   9  -7  -7  -48.63   30.92
 -15  -7  -8   21.19   34.56
 -14  -7  -8  -43.99   33.78
 -13  -7  -8   10.86   33.01
 -12  -7  -8   45.63   13.78
 -11  -7  -8   14.85   29.73
 -10  -7  -8   30.25   20.18
  -9  -7  -8   38.77   28.58
  -8  -7  -8  121.74   11.95
  -7  -7  -8   -2.64   25.54
  -6  -7  -8   17.43   22.08
  -5  -7  -8  378.23   26.93
  -4  -7  -8  138.58   12.69
  -3  -7  -8   67.84    9.91
  -2  -7  -8   21.75   21.70
  -1  -7  -8    6.72   21.40
   0  -7  -8  155.63   14.62
   1  -7  -8  198.08   18.43
   2  -7  -8   29.95   23.15
   3  -7  -8   94.70   12.21
   4  -7  -8  -23.15   26.59
   5  -7  -8   25.12   12.43
   6  -7  -8  -12.73   28.66
   7  -7  -8  -16.59   28.62
   8  -7  -8    1.70   32.29
   9  -7  -8   17.55   30.80
 -15  -7  -9  -16.24   33.79
 -14  -7  -9   74.55   14.69
 -13  -7  -9   21.36   31.50
 -12  -7  -9    5.20   30.24
 -11  -7  -9   64.62   13.31
 -10  -7  -9   28.69   12.69
  -9  -7  -9  160.60   15.29
  -8  -7  -9   61.59   11.92
  -7  -7  -9   -9.30   25.62
  -6  -7  -9   -6.95   24.70
  -5  -7  -9  108.43   11.08
  -4  -7  -9   49.95   10.62
  -3  -7  -9  171.76   14.47
  -2  -7  -9  354.97   26.94
  -1  -7  -9    1.84   24.02
   0  -7  -9   72.55   11.10
   1  -7  -9  388.84   27.61
   2  -7  -9  -23.40   27.11
   3  -7  -9   16.49   26.50
   4  -7  -9  -20.00   29.81
   5  -7  -9   68.95   12.90
   6  -7  -9   25.85   12.97
   7  -7  -9   20.63   30.34
   8  -7  -9   42.64   34.82
 -15  -7 -10   32.85   32.29
 -14  -7 -10  -31.85   33.28
 -13  -7 -10   12.21   30.84
 -12  -7 -10   95.07   13.88
 -11  -7 -10   23.20   20.58
 -10  -7 -10  347.41   23.49
  -9  -7 -10   30.91   28.76
  -8  -7 -10  183.47   17.08
  -7  -7 -10  258.54   20.31
  -6  -7 -10   14.75   17.71
  -5  -7 -10   -7.94   25.53
  -4  -7 -10   97.81   11.51
  -3  -7 -10  -27.07   25.94
  -2  -7 -10   18.39   25.74
  -1  -7 -10  402.43   29.89
   0  -7 -10  125.86   11.50
   1  -7 -10  169.40   16.12
   2  -7 -10   13.73   11.80
   3  -7 -10   51.03   12.35
   4  -7 -10   41.36   12.67
   5  -7 -10   23.40   28.68
   6  -7 -10   24.51   20.78
   7  -7 -10   -1.59   31.13
 -15  -7 -11  -47.52   37.02
 -14  -7 -11   17.93   30.82
 -13  -7 -11    8.56   30.98
 -12  -7 -11  -11.58   31.40
 -11  -7 -11  -20.42   31.14
 -10  -7 -11   -6.57   30.10
  -9  -7 -11   -9.28   29.52
  -8  -7 -11   27.99   28.35
  -7  -7 -11   29.97   26.02
  -6  -7 -11   20.41   19.10
  -5  -7 -11   14.87   25.99
  -4  -7 -11    0.77   26.66
  -3  -7 -11   -0.16   27.60
  -2  -7 -11    1.40   26.22
  -1  -7 -11   31.03   12.38
   0  -7 -11   12.35   26.18
   1  -7 -11    7.28   28.72
   2  -7 -11  102.67   13.27
   3  -7 -11    4.83   27.87
   4  -7 -11    7.51   28.56
   5  -7 -11  -11.62   30.43
   6  -7 -11   94.61   14.70
 -15  -7 -12   39.50   33.90
 -14  -7 -12    5.87   33.71
 -13  -7 -12  -20.63   33.80
 -12  -7 -12   -1.31   30.67
 -11  -7 -12   41.72   30.53
 -10  -7 -12   88.50   13.83
  -9  -7 -12   50.97   13.70
  -8  -7 -12   12.42   28.01
  -7  -7 -12   16.81   15.86
  -6  -7 -12   97.51   12.97
  -5  -7 -12  129.10   12.72
  -4  -7 -12   47.07   12.42
  -3  -7 -12  323.39   22.31
  -2  -7 -12    4.37   27.60
  -1  -7 -12   24.39   25.91
   0  -7 -12  161.96   14.99
   1  -7 -12   -1.98   27.95
   2  -7 -12   32.10   28.31
   3  -7 -12    7.60   30.35
   4  -7 -12  -29.02   30.84
   5  -7 -12   26.55   29.58
 -14  -7 -13   39.41   34.22
 -13  -7 -13   14.47   33.38
 -12  -7 -13   46.03   32.86
 -11  -7 -13   43.16   29.94
 -10  -7 -13   29.01   13.38
  -9  -7 -13   19.16   21.38
  -8  -7 -13   -0.58   29.89
  -7  -7 -13  142.37   13.92
  -6  -7 -13   65.02   13.28
  -5  -7 -13   92.59   12.68
  -4  -7 -13  -14.93   30.15
  -3  -7 -13   40.65   29.21
  -2  -7 -13   31.92   28.86
  -1  -7 -13   32.92   28.54
   0  -7 -13    5.06   28.44
   1  -7 -13    6.26   30.58
   2  -7 -13   88.24   14.01
   3  -7 -13    6.66   28.78
   4  -7 -13   30.20   28.39
   5  -7 -13    0.83   33.28
 -14  -7 -14  -55.06   36.61
 -13  -7 -14  -41.94   35.34
 -12  -7 -14  -32.42   33.68
 -11  -7 -14   51.70   13.94
 -10  -7 -14   27.88   29.87
  -9  -7 -14   44.07   31.15
  -8  -7 -14   27.30   30.89
  -7  -7 -14   26.82   32.10
  -6  -7 -14   73.35   13.78
  -5  -7 -14   37.40   13.32
  -4  -7 -14  285.81   23.48
  -3  -7 -14   20.79   29.19
  -2  -7 -14  103.85   13.60
  -1  -7 -14   42.42   13.29
   0  -7 -14  -44.56   30.36
   1  -7 -14  -15.06   30.10
   2  -7 -14   33.71   29.28
   3  -7 -14   57.65   13.43
 -13  -7 -15   51.41   35.38
 -12  -7 -15   44.97   31.86
 -11  -7 -15   58.02   14.29
 -10  -7 -15  -23.74   31.15
  -9  -7 -15   -6.75   31.95
  -8  -7 -15    7.54   17.91
  -7  -7 -15  -15.77   31.48
  -6  -7 -15   60.23   13.97
  -5  -7 -15    5.73   30.32
  -4  -7 -15   48.05   13.90
  -3  -7 -15   32.95   32.25
  -2  -7 -15   -9.62   31.14
  -1  -7 -15   19.67   30.53
   0  -7 -15  -13.92   32.79
   1  -7 -15   14.23   14.65
   2  -7 -15   21.71   32.00
 -12  -7 -16  -18.45   34.84
 -11  -7 -16    6.30   33.29
 -10  -7 -16   16.30   31.82
  -9  -7 -16  -13.15   32.98
  -8  -7 -16  -30.98   32.94
  -7  -7 -16  135.30   14.86
  -6  -7 -16   28.10   31.15
  -5  -7 -16   47.66   13.60
  -4  -7 -16   -3.53   31.21
  -3  -7 -16   18.10   31.33
  -2  -7 -16   17.58   29.76
  -1  -7 -16   10.90   30.93
   0  -7 -16   60.65   14.58
   1  -7 -16   -0.42   31.26
 -11  -7 -17   38.37   33.71
 -10  -7 -17   -0.68   33.40
  -9  -7 -17   35.21   23.92
  -8  -7 -17   73.55   14.69
  -7  -7 -17    5.63   32.88
  -6  -7 -17  -27.08   34.44
  -5  -7 -17   15.23   33.49
  -4  -7 -17   -8.98   31.21
  -3  -7 -17   10.18   22.82
  -2  -7 -17   47.46   14.42
  -1  -7 -17  -63.06   35.42
  -9  -7 -18   13.93   33.25
  -8  -7 -18   28.32   31.89
  -7  -7 -18  -10.54   33.67
  -6  -7 -18   15.91   31.64
  -5  -7 -18  -20.91   32.57
  -4  -7 -18   28.12   24.67
  -1  -8  16  -11.32   33.68
   0  -8  16   38.85   14.91
   1  -8  16    4.10   34.49
   2  -8  16  -34.90   34.77
   3  -8  16   82.61   16.09
   4  -8  16   34.17   22.98
   5  -8  16  -21.02   34.85
   6  -8  16  -56.50   35.44
   7  -8  16  -35.52   34.18
  -3  -8  15   25.97   32.85
  -2  -8  15   19.61   32.53
  -1  -8  15    9.36   29.96
   0  -8  15   42.32   31.93
   1  -8  15   -1.86   32.48
   2  -8  15  -12.87   31.52
   3  -8  15   21.16   17.93
   4  -8  15   24.76   30.88
   5  -8  15   42.83   33.58
   6  -8  15  104.78   15.64
   7  -8  15   30.50   14.87
   8  -8  15   31.47   32.26
   9  -8  15  -26.98   35.52
  -4  -8  14  -24.28   33.47
  -3  -8  14   12.57   32.58
  -2  -8  14    0.68   32.64
  -1  -8  14  -38.41   32.96
   0  -8  14   15.47   30.66
   1  -8  14    7.29   30.29
   2  -8  14   13.56   29.51
   3  -8  14    0.93   31.93
   4  -8  14  120.00   14.35
   5  -8  14  183.49   17.32
   6  -8  14   34.24   31.76
   7  -8  14   19.55   18.56
   8  -8  14    5.87   24.32
   9  -8  14  -66.19   36.03
  10  -8  14  -47.11   33.76
  -5  -8  13   30.67   30.63
  -4  -8  13   35.67   30.68
  -3  -8  13  -10.65   31.34
  -2  -8  13  -30.44   31.74
  -1  -8  13  -28.54   29.63
   0  -8  13   21.67   30.24
   1  -8  13  -14.16   30.72
   2  -8  13    0.67   30.65
   3  -8  13   60.54   13.36
   4  -8  13  -15.09   30.83
   5  -8  13   44.30   31.71
   6  -8  13   21.58   31.34
   7  -8  13  111.86   14.66
   8  -8  13    6.50   29.87
   9  -8  13  -16.68   33.97
  10  -8  13   30.40   32.07
  -7  -8  12   33.63   14.56
  -6  -8  12   22.92   31.57
  -5  -8  12   91.38   14.02
  -4  -8  12  -17.97   30.69
  -3  -8  12   16.13   14.75
  -2  -8  12   29.80   27.65
  -1  -8  12  -11.86   31.08
   0  -8  12   32.88   28.84
   1  -8  12   36.30   12.83
   2  -8  12  156.79   15.46
   3  -8  12   19.87   14.74
   4  -8  12   42.70   13.64
   5  -8  12   72.32   13.43
   6  -8  12    6.53   30.59
   7  -8  12   27.06   20.66
   8  -8  12   -9.64   31.21
   9  -8  12   42.79   14.73
  10  -8  12  -90.31   34.42
  11  -8  12   10.60   32.65
  -8  -8  11  -46.43   33.33
  -7  -8  11   33.99   30.89
  -6  -8  11   37.97   29.83
  -5  -8  11  -12.50   29.95
  -4  -8  11   33.88   30.23
  -3  -8  11   37.95   12.79
  -2  -8  11   19.44   29.16
  -1  -8  11  -31.32   29.69
   0  -8  11   54.63   12.71
   1  -8  11   17.43   27.75
   2  -8  11   49.30   12.36
   3  -8  11   15.42   28.84
   4  -8  11   80.24   13.23
   5  -8  11   18.27   28.34
   6  -8  11   25.35   29.43
   7  -8  11  -43.83   31.82
   8  -8  11   26.33   31.00
   9  -8  11   23.11   30.22
  10  -8  11    9.04   31.30
  11  -8  11   48.30   32.37
  -9  -8  10   -7.46   32.36
  -8  -8  10    8.68   32.44
  -7  -8  10   18.73   15.23
  -6  -8  10   -1.63   29.96
  -5  -8  10  -25.07   29.94
  -4  -8  10   36.09   28.27
  -3  -8  10   98.98   13.16
  -2  -8  10   29.19   26.19
  -1  -8  10   29.82   27.73
   0  -8  10  -70.51   29.26
   1  -8  10   59.24   12.55
   2  -8  10    4.48   27.08
   3  -8  10  -22.90   28.39
   4  -8  10  136.90   13.01
   5  -8  10   14.66   28.84
   6  -8  10   49.98   13.02
   7  -8  10   18.50   29.60
   8  -8  10   -0.93   29.60
   9  -8  10  -12.49   28.85
  10  -8  10    5.44   30.74
  11  -8  10   38.69   32.47
  12  -8  10   -4.08   32.79
  -9  -8   9   24.66   29.89
  -8  -8   9   78.84   14.66
  -7  -8   9   20.74   20.96
  -6  -8   9   -7.77   29.82
  -5  -8   9  119.97   13.54
  -4  -8   9   91.06   12.95
  -3  -8   9   60.39   12.33
  -2  -8   9  -12.39   25.87
  -1  -8   9   75.54   12.28
   0  -8   9    5.96   26.88
   1  -8   9   23.75   26.32
   2  -8   9   81.90   12.44
   3  -8   9  192.72   16.93
   4  -8   9   45.43   12.07
   5  -8   9    8.38   27.89
   6  -8   9  106.59   13.39
   7  -8   9   -4.42   29.01
   8  -8   9  -28.81   29.95
   9  -8   9  -49.96   31.55
  10  -8   9  -23.53   31.52
  11  -8   9   37.76   29.93
  12  -8   9   38.10   33.57
 -10  -8   8   51.47   14.78
  -9  -8   8  -15.35   32.18
  -8  -8   8   -5.05   28.62
  -7  -8   8    2.95   29.24
  -6  -8   8    4.67   28.57
  -5  -8   8  -36.68   28.99
  -4  -8   8    2.22   27.70
  -3  -8   8   -5.25   26.69
  -2  -8   8  114.21   11.72
  -1  -8   8   37.31   25.20
   0  -8   8    2.16   25.83
   1  -8   8   51.62   11.08
   2  -8   8  201.74   20.09
   3  -8   8   31.53   24.41
   4  -8   8   24.86   27.30
   5  -8   8   55.33   12.09
   6  -8   8   83.46   12.53
   7  -8   8  -35.66   29.33
   8  -8   8   37.58   30.14
   9  -8   8   -1.81   28.19
  10  -8   8  -32.09   31.06
  11  -8   8  -43.68   33.42
  12  -8   8   -1.31   34.02
 -11  -8   7   -1.03   32.60
 -10  -8   7   -5.95   32.75
  -9  -8   7   37.53   13.60
  -8  -8   7   42.88   29.79
  -7  -8   7  138.14   13.93
  -6  -8   7   14.26   28.22
  -5  -8   7  -24.07   26.70
  -4  -8   7  209.44   20.16
  -3  -8   7   13.75   17.41
  -2  -8   7   52.30   11.12
  -1  -8   7  200.92   18.24
   0  -8   7  527.28   30.04
   1  -8   7  210.84   18.81
   2  -8   7    4.86   23.94
   3  -8   7   71.99   11.29
   4  -8   7   22.95   23.93
   5  -8   7   23.76   11.30
   6  -8   7  117.10   12.49
   7  -8   7  241.43   22.49
   8  -8   7   25.62   21.10
   9  -8   7   -8.39   29.89
  10  -8   7   76.20   14.44
  11  -8   7   38.30   14.45
  12  -8   7   43.15   30.84
 -11  -8   6  -13.51   33.88
 -10  -8   6   32.79   31.67
  -9  -8   6  137.75   14.47
  -8  -8   6   20.00   31.37
  -7  -8   6   22.97   26.76
  -6  -8   6   49.75   12.59
  -5  -8   6  122.17   12.14
  -4  -8   6   36.10   11.04
  -3  -8   6   -8.72   23.95
  -2  -8   6   79.20   10.80
  -1  -8   6   -7.60   22.97
   0  -8   6    0.86   22.83
   1  -8   6   13.38   22.93
   2  -8   6   17.63   12.78
   3  -8   6   20.57   22.56
   4  -8   6  -36.71   25.18
   5  -8   6   77.16   11.72
   6  -8   6  -17.67   26.31
   7  -8   6  178.40   16.79
   8  -8   6    1.46   31.23
   9  -8   6  -18.55   30.06
  10  -8   6   11.47   29.24
  11  -8   6   57.91   14.28
  12  -8   6   21.24   31.81
 -12  -8   5   -9.17   33.76
 -11  -8   5  -11.45   32.95
 -10  -8   5   48.58   13.75
  -9  -8   5  -29.81   30.37
  -8  -8   5   14.92   27.95
  -7  -8   5   11.62   28.54
  -6  -8   5   24.86   11.49
  -5  -8   5  144.62   13.43
  -4  -8   5    2.72   23.63
  -3  -8   5   58.68   10.29
  -2  -8   5   18.04   15.19
  -1  -8   5  273.58   24.57
   0  -8   5   43.03    9.33
   1  -8   5  444.49   26.23
   2  -8   5  -12.63   22.40
   3  -8   5    7.63   22.61
   4  -8   5  252.87   18.70
   5  -8   5  -18.81   25.38
   6  -8   5    6.26   26.36
   7  -8   5  200.39   16.54
   8  -8   5   18.78   16.57
   9  -8   5   79.15   13.98
  10  -8   5   -4.36   29.83
  11  -8   5   -4.49   34.09
  12  -8   5   16.70   32.27
 -12  -8   4  -13.88   32.74
 -11  -8   4   27.06   32.52
 -10  -8   4  105.76   14.04
  -9  -8   4   19.00   29.14
  -8  -8   4   67.44   12.34
  -7  -8   4   84.47   12.31
  -6  -8   4  171.46   15.54
  -5  -8   4  287.22   27.02
  -4  -8   4  183.81   17.56
  -3  -8   4  216.38   17.24
  -2  -8   4   64.57    9.13
  -1  -8   4  375.37   24.40
   0  -8   4  176.40   15.51
   1  -8   4   48.87    9.50
   2  -8   4  128.37   11.14
   3  -8   4  -17.12   22.35
   4  -8   4   29.10   21.65
   5  -8   4    7.68   23.71
   6  -8   4   67.41   11.56
   7  -8   4    5.41   27.79
   8  -8   4   -5.57   28.18
   9  -8   4   42.73   13.18
  10  -8   4    4.35   21.35
  11  -8   4    8.27   31.44
  12  -8   4  -18.16   32.37
 -13  -8   3   19.36   32.74
 -12  -8   3  -36.34   33.43
 -11  -8   3   17.88   20.34
 -10  -8   3   38.28   12.91
  -9  -8   3  -75.79   30.41
  -8  -8   3   30.82   28.46
  -7  -8   3    7.00   24.06
  -6  -8   3   70.68   11.10
  -5  -8   3   27.06   23.49
  -4  -8   3  101.59    9.62
  -3  -8   3   34.00    9.26
  -2  -8   3   40.77    9.10
  -1  -8   3    1.71   18.74
   0  -8   3   23.67   19.52
   1  -8   3   68.63    9.17
   2  -8   3    4.15   20.05
   3  -8   3  114.89   11.20
   4  -8   3   -6.08   22.17
   5  -8   3  217.22   19.13
   6  -8   3  -15.05   25.29
   7  -8   3   60.61   12.54
   8  -8   3   30.02   29.38
   9  -8   3  109.99   13.89
  10  -8   3   30.42   30.32
  11  -8   3   34.00   30.15
  12  -8   3   23.60   32.68
 -13  -8   2  -10.33   32.35
 -12  -8   2    0.52   32.52
 -11  -8   2  -58.92   31.44
 -10  -8   2   14.47   28.80
  -9  -8   2   57.89   12.65
  -8  -8   2   13.77   25.28
  -7  -8   2  -14.58   25.34
  -6  -8   2  131.47   12.19
  -5  -8   2    3.97   21.84
  -4  -8   2  -22.52   20.01
  -3  -8   2   16.94   19.22
  -2  -8   2 1210.24   29.23
  -1  -8   2   20.37   19.92
   0  -8   2  -16.85   19.40
   1  -8   2  205.79   14.78
   2  -8   2    7.20   11.40
   3  -8   2  448.10   26.51
   4  -8   2    7.41   22.86
   5  -8   2  398.07   28.83
   6  -8   2  219.82   20.31
   7  -8   2  478.40   30.70
   8  -8   2  -37.88   29.87
   9  -8   2   25.69   28.80
  10  -8   2   21.59   29.65
  11  -8   2   24.80   22.30
  12  -8   2   -8.97   33.82
 -14  -8   1   19.30   19.34
 -13  -8   1  -15.65   34.76
 -12  -8   1   28.36   22.53
 -11  -8   1   -9.75   30.25
 -10  -8   1  -30.18   30.55
  -9  -8   1  -18.95   29.03
  -8  -8   1  169.43   15.71
  -7  -8   1  242.96   19.02
  -6  -8   1   64.03   10.48
  -5  -8   1  118.08   11.51
  -4  -8   1  228.53   22.47
  -3  -8   1   50.31    8.47
  -2  -8   1   60.32    8.52
  -1  -8   1   43.88    8.64
   0  -8   1  102.78   10.02
   1  -8   1  835.35   27.12
   2  -8   1   20.38   14.18
   3  -8   1   36.82    9.31
   4  -8   1   13.82   22.84
   5  -8   1  147.71   13.00
   6  -8   1   20.67   11.56
   7  -8   1   31.99   27.28
   8  -8   1   32.58   27.38
   9  -8   1    9.35   29.62
  10  -8   1   18.60   29.14
  11  -8   1  -30.28   33.53
  12  -8   1   12.05   32.86
 -14  -8   0  -35.91   35.47
 -13  -8   0    7.43   32.35
 -12  -8   0  -81.30   33.59
 -11  -8   0   31.18   13.87
 -10  -8   0    3.58   27.66
  -9  -8   0   -5.85   27.40
  -8  -8   0   38.42   11.59
  -7  -8   0   -1.13   24.34
  -6  -8   0  124.70   11.52
  -5  -8   0   41.00    9.27
  -4  -8   0  202.91   15.20
  -3  -8   0  608.54   24.39
  -2  -8   0  178.27   14.02
  -1  -8   0  261.97   20.56
   0  -8   0   11.38   18.16
   1  -8   0  -14.69   19.38
   2  -8   0  178.67   14.79
   3  -8   0    8.86   21.55
   4  -8   0   26.51   22.65
   5  -8   0   -0.97   24.85
   6  -8   0  193.33   16.49
   7  -8   0    4.82   26.49
   8  -8   0   50.14   13.09
   9  -8   0   -6.21   28.17
  10  -8   0  -16.00   30.28
  11  -8   0   33.34   28.62
  12  -8   0   33.14   31.11
 -14  -8  -1  -11.44   33.36
 -13  -8  -1  -12.10   31.84
 -12  -8  -1   18.18   29.77
 -11  -8  -1   53.78   13.76
 -10  -8  -1  176.33   17.54
  -9  -8  -1  -11.58   27.41
  -8  -8  -1   23.75   10.99
  -7  -8  -1  218.06   17.61
  -6  -8  -1  407.92   26.10
  -5  -8  -1   19.95   14.88
  -4  -8  -1   23.00    8.47
  -3  -8  -1   33.51    8.41
  -2  -8  -1  171.49   14.16
  -1  -8  -1    7.50   17.78
   0  -8  -1  244.59   14.61
   1  -8  -1  185.92   14.85
   2  -8  -1  -12.25   20.18
   3  -8  -1   13.25   10.53
   4  -8  -1  487.29   28.44
   5  -8  -1   -5.18   25.98
   6  -8  -1   51.60   11.75
   7  -8  -1   21.26   16.40
   8  -8  -1   96.19   13.53
   9  -8  -1  -46.45   31.27
  10  -8  -1   61.71   13.28
  11  -8  -1   -2.56   33.37
 -15  -8  -2  -51.01   35.91
 -14  -8  -2  -24.03   33.29
 -13  -8  -2    2.58   31.82
 -12  -8  -2  -20.20   33.35
 -11  -8  -2   -1.01   30.00
 -10  -8  -2   -9.91   28.27
  -9  -8  -2   29.85   24.93
  -8  -8  -2   36.60   10.88
  -7  -8  -2   20.56   22.44
  -6  -8  -2  239.29   23.62
  -5  -8  -2   19.12    8.91
  -4  -8  -2  251.63   21.11
  -3  -8  -2   47.00    8.27
  -2  -8  -2   16.52   12.67
  -1  -8  -2   70.68    8.53
   0  -8  -2  102.99    9.56
   1  -8  -2  407.52   22.81
   2  -8  -2  150.33   12.90
   3  -8  -2  144.68   13.79
   4  -8  -2    5.73   24.30
   5  -8  -2   32.45   11.36
   6  -8  -2   17.98   26.86
   7  -8  -2  278.72   22.00
   8  -8  -2   18.43   13.05
   9  -8  -2    0.24   29.37
  10  -8  -2  -17.54   32.64
  11  -8  -2   15.06   30.67
 -15  -8  -3  -23.64   35.18
 -14  -8  -3  -21.75   31.95
 -13  -8  -3   26.09   31.82
 -12  -8  -3  -14.01   31.50
 -11  -8  -3  120.37   14.23
 -10  -8  -3    9.76   28.96
  -9  -8  -3  112.63   12.34
  -8  -8  -3   21.29   23.92
  -7  -8  -3   30.20   22.35
  -6  -8  -3  532.83   26.72
  -5  -8  -3   16.96   21.15
  -4  -8  -3   45.43    8.35
  -3  -8  -3   -3.08   18.79
  -2  -8  -3  134.46   12.01
  -1  -8  -3   31.70    8.48
   0  -8  -3   14.93   18.68
   1  -8  -3  401.69   23.93
   2  -8  -3  -11.56   20.89
   3  -8  -3  253.51   25.20
   4  -8  -3   70.07   11.51
   5  -8  -3  431.61   30.42
   6  -8  -3  101.93   12.97
   7  -8  -3   21.57   12.12
   8  -8  -3   36.20   13.46
   9  -8  -3  -36.86   30.67
  10  -8  -3    1.95   30.86
  11  -8  -3   28.38   32.00
 -15  -8  -4  -34.65   34.57
 -14  -8  -4   44.19   33.35
 -13  -8  -4   40.21   14.46
 -12  -8  -4    1.13   31.84
 -11  -8  -4   73.19   13.53
 -10  -8  -4   27.38   12.63
  -9  -8  -4  181.90   16.13
  -8  -8  -4   74.03   11.46
  -7  -8  -4   53.62   10.40
  -6  -8  -4   53.90    9.63
  -5  -8  -4   12.62   20.58
  -4  -8  -4  318.23   23.70
  -3  -8  -4   -8.16   19.39
  -2  -8  -4  210.89   20.91
  -1  -8  -4  555.08   24.41
   0  -8  -4  189.71   15.38
   1  -8  -4    9.76   19.94
   2  -8  -4  -11.76   22.35
   3  -8  -4   32.76   10.44
   4  -8  -4   23.33   11.17
   5  -8  -4   -7.18   25.07
   6  -8  -4   15.17   27.57
   7  -8  -4   21.68   15.93
   8  -8  -4    6.12   29.00
   9  -8  -4   10.23   31.61
  10  -8  -4   -8.42   32.55
 -15  -8  -5   -0.81   33.97
 -14  -8  -5   31.59   31.77
 -13  -8  -5  -35.12   32.59
 -12  -8  -5   25.34   30.37
 -11  -8  -5  -38.98   29.66
 -10  -8  -5   21.33   29.00
  -9  -8  -5   61.04   12.54
  -8  -8  -5  199.57   19.59
  -7  -8  -5   28.44   23.06
  -6  -8  -5  -10.41   23.40
  -5  -8  -5    9.12   19.46
  -4  -8  -5  -13.67   20.68
  -3  -8  -5   17.92   13.80
  -2  -8  -5   43.93    8.99
  -1  -8  -5   17.91   21.23
   0  -8  -5  230.85   15.74
   1  -8  -5  107.86   10.08
   2  -8  -5   14.10   22.46
   3  -8  -5  -31.00   25.71
   4  -8  -5  185.06   15.90
   5  -8  -5   -4.32   26.17
   6  -8  -5   25.36   12.18
   7  -8  -5   30.86   12.44
   8  -8  -5  -12.95   29.85
   9  -8  -5   -0.03   30.82
  10  -8  -5   23.63   18.36
 -15  -8  -6  -31.02   36.88
 -14  -8  -6   18.96   32.15
 -13  -8  -6   32.96   29.95
 -12  -8  -6  143.65   14.56
 -11  -8  -6  -19.38   31.31
 -10  -8  -6  -17.52   28.21
  -9  -8  -6  364.73   30.89
  -8  -8  -6  252.26   20.08
  -7  -8  -6  -28.44   24.81
  -6  -8  -6    4.39   23.18
  -5  -8  -6  105.81   10.11
  -4  -8  -6   16.86   22.23
  -3  -8  -6   98.13    9.76
  -2  -8  -6   23.17   20.62
  -1  -8  -6  125.24   11.32
   0  -8  -6  232.11   17.48
   1  -8  -6  186.85   17.27
   2  -8  -6  235.83   19.33
   3  -8  -6  -26.77   24.56
   4  -8  -6  108.74   11.93
   5  -8  -6   16.41   27.84
   6  -8  -6   71.59   13.02
   7  -8  -6    8.43   27.06
   8  -8  -6   -9.82   31.00
   9  -8  -6   27.53   31.44
 -15  -8  -7   22.41   35.95
 -14  -8  -7  -26.75   33.73
 -13  -8  -7  -34.57   33.09
 -12  -8  -7    0.73   30.46
 -11  -8  -7   43.46   29.33
 -10  -8  -7  -65.68   30.75
  -9  -8  -7  -20.78   28.17
  -8  -8  -7   70.43   11.85
  -7  -8  -7   70.66   11.32
  -6  -8  -7   25.09   10.65
  -5  -8  -7   48.65   10.05
  -4  -8  -7  -19.20   23.05
  -3  -8  -7    6.94   21.56
  -2  -8  -7   21.80   22.11
  -1  -8  -7   75.04   10.47
   0  -8  -7  179.99   17.64
   1  -8  -7   18.47   22.81
   2  -8  -7    9.00   18.11
   3  -8  -7   21.84   25.30
   4  -8  -7  -15.50   28.12
   5  -8  -7  107.25   13.46
   6  -8  -7  -27.04   28.59
   7  -8  -7    9.31   30.14
   8  -8  -7   42.36   30.71
   9  -8  -7  -31.80   31.87
 -15  -8  -8   -8.93   32.71
 -14  -8  -8   74.50   14.91
 -13  -8  -8  -57.98   31.81
 -12  -8  -8   27.80   21.51
 -11  -8  -8  -30.07   31.20
 -10  -8  -8   32.99   28.10
  -9  -8  -8  -37.84   27.71
  -8  -8  -8   38.03   27.21
  -7  -8  -8  -13.20   26.39
  -6  -8  -8   27.90   23.27
  -5  -8  -8   -0.13   23.58
  -4  -8  -8   -7.50   24.51
  -3  -8  -8  109.96   10.91
  -2  -8  -8  250.68   18.95
  -1  -8  -8   82.45   11.21
   0  -8  -8  153.40   14.83
   1  -8  -8   11.03   24.54
   2  -8  -8  -10.20   25.67
   3  -8  -8  125.79   12.67
   4  -8  -8   20.47   26.43
   5  -8  -8   26.02   28.33
   6  -8  -8   33.15   30.68
   7  -8  -8   44.93   32.55
   8  -8  -8  -17.07   32.34
 -15  -8  -9    0.63   32.87
 -14  -8  -9  -14.80   33.63
 -13  -8  -9  -16.99   30.86
 -12  -8  -9    7.34   31.50
 -11  -8  -9   20.79   30.02
 -10  -8  -9   -5.74   29.33
  -9  -8  -9   57.76   12.86
  -8  -8  -9    7.00   19.29
  -7  -8  -9   22.71   26.91
  -6  -8  -9   17.92   25.66
  -5  -8  -9  160.00   15.40
  -4  -8  -9   34.36   11.30
  -3  -8  -9   16.88   24.76
  -2  -8  -9  184.55   18.45
  -1  -8  -9   12.11   24.23
   0  -8  -9  156.95   15.59
   1  -8  -9  169.16   16.37
   2  -8  -9   32.93   27.42
   3  -8  -9   32.05   26.09
   4  -8  -9  -32.87   29.54
   5  -8  -9    4.89   26.91
   6  -8  -9   31.31   13.04
   7  -8  -9   37.89   30.37
 -15  -8 -10  -24.88   34.55
 -14  -8 -10   -9.28   32.91
 -13  -8 -10  -18.73   31.30
 -12  -8 -10    7.79   31.79
 -11  -8 -10    9.70   30.68
 -10  -8 -10   95.77   14.07
  -9  -8 -10    9.65   20.10
  -8  -8 -10  -24.15   28.91
  -7  -8 -10  -27.61   27.35
  -6  -8 -10   15.81   27.08
  -5  -8 -10    0.16   29.01
  -4  -8 -10   66.78   11.51
  -3  -8 -10  252.11   20.52
  -2  -8 -10   38.38   26.08
  -1  -8 -10   20.74   18.39
   0  -8 -10  112.31   12.67
   1  -8 -10   17.42   28.09
   2  -8 -10   -3.97   26.40
   3  -8 -10   80.90   12.98
   4  -8 -10  101.46   13.57
   5  -8 -10    2.45   29.36
   6  -8 -10    4.64   29.32
   7  -8 -10   41.62   14.51
 -15  -8 -11  -34.57   35.54
 -14  -8 -11   62.09   14.60
 -13  -8 -11   -2.05   31.91
 -12  -8 -11   19.22   30.85
 -11  -8 -11   22.70   30.70
 -10  -8 -11   25.00   30.31
  -9  -8 -11   73.87   13.42
  -8  -8 -11   52.51   13.10
  -7  -8 -11    9.18   28.28
  -6  -8 -11   80.56   12.65
  -5  -8 -11  169.45   16.60
  -4  -8 -11   43.67   12.73
  -3  -8 -11  -32.25   27.20
  -2  -8 -11   18.61   19.09
  -1  -8 -11  126.55   12.74
   0  -8 -11   61.36   12.85
   1  -8 -11    2.52   27.70
   2  -8 -11  146.21   14.62
   3  -8 -11  136.69   13.64
   4  -8 -11   34.02   12.92
   5  -8 -11  -48.02   32.35
   6  -8 -11   28.39   32.92
 -14  -8 -12   10.85   23.97
 -13  -8 -12   19.13   31.98
 -12  -8 -12  -18.92   32.67
 -11  -8 -12  -33.03   32.22
 -10  -8 -12   20.87   29.52
  -9  -8 -12   27.29   29.33
  -8  -8 -12   37.67   12.93
  -7  -8 -12   -0.62   29.25
  -6  -8 -12  220.84   21.54
  -5  -8 -12  -23.25   29.51
  -4  -8 -12   71.16   12.55
  -3  -8 -12   14.15   29.52
  -2  -8 -12   53.64   12.58
  -1  -8 -12   34.59   12.60
   0  -8 -12   -3.57   30.31
   1  -8 -12   25.49   20.23
   2  -8 -12   24.29   28.15
   3  -8 -12   44.45   30.03
   4  -8 -12   13.47   29.38
   5  -8 -12   36.12   14.15
 -14  -8 -13    6.13   34.78
 -13  -8 -13   -2.64   32.45
 -12  -8 -13   19.37   31.54
 -11  -8 -13    8.56   30.20
 -10  -8 -13    2.69   30.07
  -9  -8 -13   49.93   14.60
  -8  -8 -13   14.91   30.24
  -7  -8 -13   39.46   13.64
  -6  -8 -13   45.38   31.14
  -5  -8 -13   42.41   31.55
  -4  -8 -13  151.64   14.02
  -3  -8 -13   20.58   28.53
  -2  -8 -13    9.92   21.86
  -1  -8 -13   39.13   27.82
   0  -8 -13  -21.07   29.27
   1  -8 -13   77.17   13.79
   2  -8 -13   23.94   13.29
   3  -8 -13  -14.18   31.72
   4  -8 -13   -0.14   30.89
 -13  -8 -14  -38.15   33.87
 -12  -8 -14    1.02   23.32
 -11  -8 -14   83.27   15.07
 -10  -8 -14   14.16   31.02
  -9  -8 -14  121.54   14.35
  -8  -8 -14  -13.70   30.91
  -7  -8 -14  -23.91   30.25
  -6  -8 -14   26.23   20.73
  -5  -8 -14  -49.45   29.09
  -4  -8 -14   40.99   30.78
  -3  -8 -14  -31.69   31.65
  -2  -8 -14  159.88   15.70
  -1  -8 -14   32.00   31.01
   0  -8 -14  -12.73   30.26
   1  -8 -14   46.08   14.29
   2  -8 -14  -26.03   33.21
   3  -8 -14   23.12   32.29
 -12  -8 -15   17.30   34.02
 -11  -8 -15   27.37   22.71
 -10  -8 -15  -15.79   32.28
  -9  -8 -15  -19.87   32.80
  -8  -8 -15  -12.00   33.63
  -7  -8 -15   28.80   30.94
  -6  -8 -15   23.60   21.64
  -5  -8 -15  121.95   14.41
  -4  -8 -15   23.21   29.93
  -3  -8 -15   -3.87   30.62
  -2  -8 -15  -12.84   32.18
  -1  -8 -15    3.88   30.98
   0  -8 -15   18.00   32.48
   1  -8 -15  -41.37   33.58
 -11  -8 -16   21.77   32.49
 -10  -8 -16   38.66   33.57
  -9  -8 -16   36.65   31.79
  -8  -8 -16    1.29   32.77
  -7  -8 -16   35.38   33.35
  -6  -8 -16   26.80   31.22
  -5  -8 -16   -1.38   31.87
  -4  -8 -16   18.28   15.94
  -3  -8 -16   17.80   32.38
  -2  -8 -16  -32.60   32.26
  -1  -8 -16   30.18   29.58
   0  -8 -16  104.53   15.27
 -10  -8 -17  -57.45   36.05
  -9  -8 -17   45.44   32.33
  -8  -8 -17  -29.56   33.25
  -7  -8 -17   11.57   33.31
  -6  -8 -17   29.87   30.70
  -5  -8 -17   27.41   31.74
  -4  -8 -17   28.00   31.50
  -3  -8 -17   -2.32   32.05
  -2  -8 -17  -68.79   35.36
   2  -9  16  -40.60   35.41
   3  -9  16   23.85   24.88
   4  -9  16   51.68   14.65
   5  -9  16    1.24   35.39
  -1  -9  15   40.56   35.38
   0  -9  15   24.01   14.33
   1  -9  15   12.65   34.15
   2  -9  15    4.49   32.08
   3  -9  15   -1.16   31.57
   4  -9  15  -31.17   35.58
   5  -9  15   -6.50   34.02
   6  -9  15  -32.73   36.15
   7  -9  15  -39.20   34.11
  -3  -9  14   33.66   31.78
  -2  -9  14   27.65   31.50
  -1  -9  14   33.21   30.58
   0  -9  14  -24.12   32.34
   1  -9  14    8.93   29.94
   2  -9  14  -17.23   30.78
   3  -9  14   13.63   31.01
   4  -9  14   -5.76   31.58
   5  -9  14  -13.61   33.24
   6  -9  14    2.41   33.02
   7  -9  14   -2.68   33.87
   8  -9  14   35.26   32.06
   9  -9  14   35.27   33.83
  -5  -9  13   -4.85   33.35
  -4  -9  13   35.26   13.66
  -3  -9  13   20.11   15.02
  -2  -9  13   -0.58   30.60
  -1  -9  13    8.17   29.97
   0  -9  13   47.18   31.88
   1  -9  13    3.08   30.06
   2  -9  13  -18.28   31.57
   3  -9  13   10.87   30.00
   4  -9  13   85.41   14.42
   5  -9  13   35.63   29.94
   6  -9  13   29.36   14.21
   7  -9  13  209.59   19.76
   8  -9  13   27.95   31.30
   9  -9  13   37.94   31.13
  -6  -9  12  -30.92   31.75
  -5  -9  12  -23.02   33.02
  -4  -9  12   39.06   30.77
  -3  -9  12   25.17   21.07
  -2  -9  12   -4.14   31.57
  -1  -9  12   17.82   30.42
   0  -9  12  -13.10   30.17
   1  -9  12   18.45   28.91
   2  -9  12  142.20   13.59
   3  -9  12  -16.80   29.85
   4  -9  12    5.52   31.34
   5  -9  12   13.26   31.03
   6  -9  12   13.78   30.17
   7  -9  12    7.84   31.86
   8  -9  12   41.44   31.76
   9  -9  12  -44.65   34.18
  10  -9  12  -30.72   33.41
  -7  -9  11   24.08   18.74
  -6  -9  11   -4.63   32.39
  -5  -9  11   20.80   30.16
  -4  -9  11   10.28   29.81
  -3  -9  11   -5.01   31.83
  -2  -9  11   -9.01   29.09
  -1  -9  11   74.23   13.40
   0  -9  11    5.15   27.91
   1  -9  11   38.86   29.38
   2  -9  11  -21.10   28.82
   3  -9  11   61.14   13.32
   4  -9  11   -1.63   27.64
   5  -9  11   30.71   28.81
   6  -9  11   84.22   13.68
   7  -9  11  -44.52   30.87
   8  -9  11   25.39   33.05
   9  -9  11   34.53   30.05
  10  -9  11   36.10   32.04
  11  -9  11   38.95   14.82
  -8  -9  10   20.96   15.87
  -7  -9  10  -24.63   31.48
  -6  -9  10   21.73   21.57
  -5  -9  10   16.45   28.26
  -4  -9  10  -33.30   29.91
  -3  -9  10   96.93   13.43
  -2  -9  10   38.01   27.64
  -1  -9  10   69.94   13.28
   0  -9  10    0.58   28.39
   1  -9  10   55.90   13.30
   2  -9  10   54.78   12.51
   3  -9  10  100.78   13.05
   4  -9  10   52.95   12.89
   5  -9  10   29.33   27.98
   6  -9  10   18.24   30.24
   7  -9  10   58.36   12.97
   8  -9  10   22.73   30.57
   9  -9  10  -28.18   31.75
  10  -9  10  -40.69   33.31
  11  -9  10  -20.37   35.18
  -9  -9   9   23.65   18.25
  -8  -9   9   40.01   30.94
  -7  -9   9  -28.91   30.54
  -6  -9   9   18.60   29.16
  -5  -9   9  -22.24   30.37
  -4  -9   9   50.68   12.84
  -3  -9   9   20.93   27.58
  -2  -9   9   18.94   27.61
  -1  -9   9   20.72   26.21
   0  -9   9   23.39   28.43
   1  -9   9   12.87   13.45
   2  -9   9   10.09   26.65
   3  -9   9   45.82   12.30
   4  -9   9   45.22   12.61
   5  -9   9   40.23   28.51
   6  -9   9  -13.57   29.57
   7  -9   9   -5.95   29.07
   8  -9   9   19.10   30.60
   9  -9   9    7.64   31.19
  10  -9   9   76.36   13.57
  11  -9   9    3.58   32.33
 -10  -9   8  -26.76   33.59
  -9  -9   8    7.98   32.00
  -8  -9   8  -27.75   31.49
  -7  -9   8    3.51   29.82
  -6  -9   8  -24.41   30.82
  -5  -9   8  104.98   13.20
  -4  -9   8   29.42   28.16
  -3  -9   8  -18.31   27.60
  -2  -9   8  146.14   12.99
  -1  -9   8   50.43   11.99
   0  -9   8   35.18   25.73
   1  -9   8   30.27   27.34
   2  -9   8  460.68   32.90
   3  -9   8   -9.94   27.70
   4  -9   8   20.46   25.67
   5  -9   8  592.66   34.30
   6  -9   8   16.64   20.35
   7  -9   8   32.55   27.52
   8  -9   8   -1.86   29.44
   9  -9   8   33.24   30.10
  10  -9   8   23.90   17.92
  11  -9   8   26.58   31.33
 -10  -9   7    1.65   33.51
  -9  -9   7   63.02   14.53
  -8  -9   7   26.80   21.00
  -7  -9   7  199.53   17.71
  -6  -9   7   39.26   12.85
  -5  -9   7   20.97   28.35
  -4  -9   7  122.65   12.34
  -3  -9   7   26.57   24.89
  -2  -9   7   38.77   27.21
  -1  -9   7   -5.54   25.15
   0  -9   7  172.57   13.66
   1  -9   7   20.56   23.82
   2  -9   7   38.51   11.28
   3  -9   7    1.51   26.11
   4  -9   7   22.75   26.40
   5  -9   7   72.20   12.12
   6  -9   7   33.66   28.70
   7  -9   7  106.42   13.33
   8  -9   7   32.46   28.03
   9  -9   7   24.30   28.82
  10  -9   7  -28.40   31.89
  11  -9   7  -19.23   34.00
  12  -9   7   43.66   31.51
 -11  -9   6   -6.36   34.42
 -10  -9   6  -41.50   34.07
  -9  -9   6   27.44   31.42
  -8  -9   6  -29.57   31.36
  -7  -9   6    5.26   29.39
  -6  -9   6  -14.79   27.72
  -5  -9   6  -15.92   26.77
  -4  -9   6  -25.69   27.58
  -3  -9   6   36.69   11.75
  -2  -9   6   30.65   10.90
  -1  -9   6  175.67   14.77
   0  -9   6  154.32   15.16
   1  -9   6   26.82   24.46
   2  -9   6  161.49   15.08
   3  -9   6  139.88   13.42
   4  -9   6  -19.37   26.08
   5  -9   6    7.90   26.27
   6  -9   6  126.33   12.93
   7  -9   6  101.51   12.66
   8  -9   6   -4.24   30.50
   9  -9   6   57.19   13.79
  10  -9   6  104.74   14.50
  11  -9   6   14.30   31.76
  12  -9   6   31.94   14.20
 -12  -9   5   19.48   30.91
 -11  -9   5   -7.40   33.17
 -10  -9   5  -38.75   31.48
  -9  -9   5   43.16   29.97
  -8  -9   5  -44.78   28.81
  -7  -9   5   36.43   12.24
  -6  -9   5   37.87   27.14
  -5  -9   5   85.58   11.96
  -4  -9   5   33.70   11.55
  -3  -9   5  246.69   24.51
  -2  -9   5   77.32   10.98
  -1  -9   5  328.53   26.55
   0  -9   5   21.12   24.22
   1  -9   5  262.88   18.93
   2  -9   5   75.79   10.65
   3  -9   5   30.90   23.01
   4  -9   5  115.26   11.84
   5  -9   5   24.93   25.23
   6  -9   5  -10.81   27.16
   7  -9   5  -10.11   28.30
   8  -9   5   -4.17   30.33
   9  -9   5   54.34   13.60
  10  -9   5   17.43   30.31
  11  -9   5   16.87   31.71
  12  -9   5  -11.79   33.78
 -12  -9   4   -1.58   34.54
 -11  -9   4   17.72   30.53
 -10  -9   4   62.45   13.65
  -9  -9   4  -32.23   29.55
  -8  -9   4  117.31   13.08
  -7  -9   4  -20.47   27.59
  -6  -9   4   16.86   14.91
  -5  -9   4   48.24   11.15
  -4  -9   4    6.09   23.95
  -3  -9   4   28.38   10.68
  -2  -9   4   34.57   24.81
  -1  -9   4  210.26   18.15
   0  -9   4  133.32   12.02
   1  -9   4   31.32    9.58
   2  -9   4  -12.27   23.67
   3  -9   4    4.09   23.65
   4  -9   4   86.67   11.48
   5  -9   4   20.55   27.22
   6  -9   4  -12.84   26.62
   7  -9   4  -47.99   30.25
   8  -9   4   89.64   13.18
   9  -9   4   40.48   28.81
  10  -9   4   33.07   31.97
  11  -9   4    5.32   30.58
  12  -9   4   43.13   32.42
 -13  -9   3   -6.30   33.42
 -12  -9   3   27.82   32.70
 -11  -9   3   33.99   31.75
 -10  -9   3   40.23   30.26
  -9  -9   3  -21.53   29.17
  -8  -9   3   10.41   29.40
  -7  -9   3   23.89   12.11
  -6  -9   3   -0.23   24.36
  -5  -9   3   34.26   10.73
  -4  -9   3  206.00   17.39
  -3  -9   3   32.57   10.06
  -2  -9   3   78.63   10.35
  -1  -9   3   75.33   10.15
   0  -9   3  724.82   27.84
   1  -9   3   11.28   22.78
   2  -9   3  162.07   14.37
   3  -9   3  527.25   28.36
   4  -9   3   18.23   13.95
   5  -9   3  128.15   11.88
   6  -9   3  -38.68   27.04
   7  -9   3   64.03   12.57
   8  -9   3  128.87   13.93
   9  -9   3   52.89   14.04
  10  -9   3  -37.18   31.27
  11  -9   3   37.36   30.19
 -13  -9   2   31.21   31.59
 -12  -9   2  -23.21   32.74
 -11  -9   2  -74.52   33.19
 -10  -9   2   41.67   29.26
  -9  -9   2   17.65   30.98
  -8  -9   2   93.01   12.58
  -7  -9   2   87.68   11.73
  -6  -9   2   20.69   14.39
  -5  -9   2   17.36   22.93
  -4  -9   2   -1.13   22.61
  -3  -9   2  134.32   11.65
  -2  -9   2  362.31   25.28
  -1  -9   2   84.49    9.76
   0  -9   2  340.79   24.19
   1  -9   2   70.21   10.00
   2  -9   2   50.40   10.00
   3  -9   2   15.32   16.62
   4  -9   2    3.02   24.25
   5  -9   2   71.28   11.76
   6  -9   2   15.06   18.53
   7  -9   2   13.65   28.31
   8  -9   2   20.45   30.07
   9  -9   2   -0.23   29.46
  10  -9   2    6.68   29.74
  11  -9   2   17.59   32.51
 -13  -9   1  -11.49   32.59
 -12  -9   1   43.45   33.21
 -11  -9   1   31.30   31.05
 -10  -9   1  -40.35   31.82
  -9  -9   1   99.36   13.23
  -8  -9   1   37.35   27.06
  -7  -9   1    7.26   24.97
  -6  -9   1   81.10   10.88
  -5  -9   1   56.35   10.49
  -4  -9   1  143.22   12.90
  -3  -9   1  138.61   12.91
  -2  -9   1   23.48    9.25
  -1  -9   1   74.49    9.33
   0  -9   1   17.56   20.58
   1  -9   1   32.31   22.43
   2  -9   1   14.02   21.73
   3  -9   1   17.16   23.56
   4  -9   1  207.23   19.09
   5  -9   1   23.06   25.79
   6  -9   1  -11.71   27.62
   7  -9   1   80.55   12.62
   8  -9   1  115.65   13.87
   9  -9   1   21.57   14.71
  10  -9   1   11.72   30.59
  11  -9   1   45.46   30.33
 -14  -9   0    9.47   34.51
 -13  -9   0   26.70   14.77
 -12  -9   0   28.26   14.37
 -11  -9   0  144.62   14.17
 -10  -9   0   15.30   30.51
  -9  -9   0   17.25   27.40
  -8  -9   0  267.58   20.84
  -7  -9   0   -2.16   25.06
  -6  -9   0   -9.75   24.14
  -5  -9   0  153.09   13.69
  -4  -9   0   79.48    9.72
  -3  -9   0  -17.87   21.03
  -2  -9   0  -11.67   20.22
  -1  -9   0  763.57   27.94
   0  -9   0   26.38    9.28
   1  -9   0   66.87    9.46
   2  -9   0  179.95   16.14
   3  -9   0   39.33   10.03
   4  -9   0  -12.35   23.75
   5  -9   0   33.46   23.86
   6  -9   0   12.31   26.41
   7  -9   0   41.65   12.57
   8  -9   0   16.98   20.06
   9  -9   0   -2.72   29.10
  10  -9   0   15.05   29.01
  11  -9   0  -22.35   33.16
 -14  -9  -1  -21.03   32.98
 -13  -9  -1    5.33   34.64
 -12  -9  -1  -27.81   31.28
 -11  -9  -1  -11.11   30.51
 -10  -9  -1   -2.27   30.45
  -9  -9  -1   40.50   12.76
  -8  -9  -1   18.45   25.82
  -7  -9  -1   18.62   23.64
  -6  -9  -1    5.30   23.30
  -5  -9  -1  -20.02   22.56
  -4  -9  -1  105.23    9.82
  -3  -9  -1    9.66   19.43
  -2  -9  -1  195.52   15.41
  -1  -9  -1   72.02    9.25
   0  -9  -1   -7.73   20.57
   1  -9  -1   -6.21   21.18
   2  -9  -1  108.65   10.66
   3  -9  -1   -4.68   23.12
   4  -9  -1   36.97   10.72
   5  -9  -1   25.86   11.50
   6  -9  -1   30.17   11.75
   7  -9  -1  -56.04   31.37
   8  -9  -1   24.92   27.82
   9  -9  -1   54.35   12.93
  10  -9  -1   11.18   22.70
  11  -9  -1   -8.92   32.56
 -14  -9  -2  -47.85   34.31
 -13  -9  -2   26.84   33.13
 -12  -9  -2    5.25   32.30
 -11  -9  -2   -3.11   31.85
 -10  -9  -2   94.71   14.08
  -9  -9  -2  -43.30   28.09
  -8  -9  -2  124.88   12.07
  -7  -9  -2  243.82   19.25
  -6  -9  -2   13.54   23.33
  -5  -9  -2   10.93   22.03
  -4  -9  -2   89.79    9.71
  -3  -9  -2    1.36   19.68
  -2  -9  -2  412.08   23.71
  -1  -9  -2  180.21   15.52
   0  -9  -2  401.56   24.72
   1  -9  -2  135.40   13.09
   2  -9  -2   12.89   10.94
   3  -9  -2  171.45   14.65
   4  -9  -2  112.57   11.55
   5  -9  -2   19.22   24.43
   6  -9  -2    3.97   26.95
   7  -9  -2  173.19   16.78
   8  -9  -2   13.89   30.74
   9  -9  -2   21.50   17.95
  10  -9  -2    9.88   31.29
 -14  -9  -3   -4.92   32.84
 -13  -9  -3  -25.41   32.49
 -12  -9  -3   19.65   32.41
 -11  -9  -3  192.28   16.30
 -10  -9  -3  150.03   14.89
  -9  -9  -3   87.98   12.78
  -8  -9  -3   29.59   11.64
  -7  -9  -3   -1.61   17.65
  -6  -9  -3  -10.59   23.93
  -5  -9  -3  -11.29   22.17
  -4  -9  -3    9.57   22.90
  -3  -9  -3   29.43   21.01
  -2  -9  -3   40.91    9.23
  -1  -9  -3   19.67   13.88
   0  -9  -3   51.50    9.49
   1  -9  -3   33.65   23.01
   2  -9  -3  -28.03   23.47
   3  -9  -3  100.87   11.07
   4  -9  -3   -8.48   25.59
   5  -9  -3  -36.87   28.26
   6  -9  -3  100.84   12.76
   7  -9  -3  -21.86   29.60
   8  -9  -3   22.22   29.65
   9  -9  -3   -0.73   30.64
  10  -9  -3  -33.98   33.68
 -15  -9  -4   15.62   33.99
 -14  -9  -4   95.75   15.47
 -13  -9  -4  -44.91   34.25
 -12  -9  -4    3.44   32.20
 -11  -9  -4  -32.16   30.50
 -10  -9  -4   64.39   13.31
  -9  -9  -4   -5.73   26.21
  -8  -9  -4   21.88   26.05
  -7  -9  -4   32.99   23.27
  -6  -9  -4  -12.71   23.79
  -5  -9  -4  165.86   16.50
  -4  -9  -4  273.24   24.31
  -3  -9  -4   21.59    9.69
  -2  -9  -4  -28.18   21.49
  -1  -9  -4   12.51    9.54
   0  -9  -4   -3.19   22.29
   1  -9  -4    4.02   22.45
   2  -9  -4  155.65   14.46
   3  -9  -4  141.85   13.42
   4  -9  -4   73.85   11.80
   5  -9  -4   20.89   27.06
   6  -9  -4   47.26   12.58
   7  -9  -4   24.17   29.65
   8  -9  -4   -8.14   30.43
   9  -9  -4  -16.58   31.71
 -15  -9  -5   -9.74   34.11
 -14  -9  -5   37.78   32.05
 -13  -9  -5   93.16   15.31
 -12  -9  -5   64.79   14.45
 -11  -9  -5   16.12   21.25
 -10  -9  -5  299.03   21.95
  -9  -9  -5   22.63   26.67
  -8  -9  -5   35.34   27.08
  -7  -9  -5   74.45   11.64
  -6  -9  -5  180.90   18.02
  -5  -9  -5   24.57    9.98
  -4  -9  -5  160.12   13.32
  -3  -9  -5   83.60    9.94
  -2  -9  -5  -33.03   22.86
  -1  -9  -5   19.02   22.11
   0  -9  -5   93.41   10.67
   1  -9  -5  134.21   12.29
   2  -9  -5   18.34   24.25
   3  -9  -5   50.72   11.23
   4  -9  -5    8.90   26.08
   5  -9  -5   -3.10   27.53
   6  -9  -5   29.18   12.82
   7  -9  -5  -78.89   32.35
   8  -9  -5   31.53   13.28
   9  -9  -5   -4.32   30.58
 -15  -9  -6   34.36   15.24
 -14  -9  -6  -26.94   33.30
 -13  -9  -6   13.12   31.09
 -12  -9  -6   56.94   13.39
 -11  -9  -6   14.98   29.85
 -10  -9  -6   29.41   30.17
  -9  -9  -6    9.14   28.93
  -8  -9  -6   39.41   12.13
  -7  -9  -6   -2.84   25.94
  -6  -9  -6  102.39   11.54
  -5  -9  -6   21.94   24.06
  -4  -9  -6  172.72   16.90
  -3  -9  -6   -0.94   22.09
  -2  -9  -6   34.04   10.38
  -1  -9  -6  -11.78   23.44
   0  -9  -6   25.93   22.45
   1  -9  -6   14.37   24.12
   2  -9  -6   64.00   11.62
   3  -9  -6  -24.59   26.36
   4  -9  -6  -29.70   27.60
   5  -9  -6   32.39   12.91
   6  -9  -6   35.17   27.86
   7  -9  -6   54.72   13.34
   8  -9  -6   21.72   33.16
 -15  -9  -7    3.25   34.18
 -14  -9  -7  -16.18   33.90
 -13  -9  -7   13.03   30.81
 -12  -9  -7   66.49   14.56
 -11  -9  -7  -20.70   30.66
 -10  -9  -7   16.77   28.83
  -9  -9  -7   37.35   29.77
  -8  -9  -7   -8.82   26.73
  -7  -9  -7   12.45   14.78
  -6  -9  -7  141.75   13.32
  -5  -9  -7   17.08   23.79
  -4  -9  -7    2.37   23.46
  -3  -9  -7   11.89   24.11
  -2  -9  -7  400.29   28.20
  -1  -9  -7   20.92   24.60
   0  -9  -7   37.69   10.77
   1  -9  -7   57.88   11.60
   2  -9  -7  249.19   20.42
   3  -9  -7   28.47   19.84
   4  -9  -7  -30.32   28.67
   5  -9  -7  233.90   22.01
   6  -9  -7    0.79   21.20
   7  -9  -7  -29.70   31.01
   8  -9  -7   45.50   14.73
 -15  -9  -8    9.50   34.60
 -14  -9  -8    1.33   35.28
 -13  -9  -8   27.80   22.69
 -12  -9  -8   31.57   29.49
 -11  -9  -8  133.85   14.50
 -10  -9  -8    2.61   29.04
  -9  -9  -8   80.40   13.23
  -8  -9  -8  -10.71   28.41
  -7  -9  -8   56.45   12.28
  -6  -9  -8   -3.35   25.88
  -5  -9  -8   60.61   11.46
  -4  -9  -8  135.80   11.50
  -3  -9  -8   23.34   25.40
  -2  -9  -8  322.79   28.77
  -1  -9  -8  -12.39   26.20
   0  -9  -8  -17.04   26.29
   1  -9  -8  106.91   12.34
   2  -9  -8  -16.32   27.45
   3  -9  -8   -9.98   28.67
   4  -9  -8   65.60   13.10
   5  -9  -8    1.30   30.18
   6  -9  -8  -12.41   31.23
   7  -9  -8   25.87   20.91
 -15  -9  -9  -12.17   35.33
 -14  -9  -9    5.63   32.90
 -13  -9  -9   26.02   30.43
 -12  -9  -9   35.00   29.95
 -11  -9  -9   82.81   13.92
 -10  -9  -9   -0.21   31.04
  -9  -9  -9    4.90   29.00
  -8  -9  -9   10.40   27.96
  -7  -9  -9   39.23   12.33
  -6  -9  -9   17.08   26.39
  -5  -9  -9   29.20   27.69
  -4  -9  -9   -0.31   25.37
  -3  -9  -9  -13.88   26.70
  -2  -9  -9   14.47   26.57
  -1  -9  -9  226.76   19.93
   0  -9  -9    3.07   27.34
   1  -9  -9  -26.56   26.77
   2  -9  -9   22.17   12.26
   3  -9  -9    6.37   28.46
   4  -9  -9   47.98   13.28
   5  -9  -9   10.19   30.33
   6  -9  -9   25.91   31.05
   7  -9  -9  -21.38   33.31
 -14  -9 -10    3.15   34.02
 -13  -9 -10  -37.76   33.24
 -12  -9 -10    4.95   31.77
 -11  -9 -10  -39.35   30.65
 -10  -9 -10   35.26   28.94
  -9  -9 -10   62.76   13.15
  -8  -9 -10  128.07   13.54
  -7  -9 -10   24.95   29.34
  -6  -9 -10   82.10   12.49
  -5  -9 -10   21.47   25.96
  -4  -9 -10   65.09   12.13
  -3  -9 -10  274.92   21.03
  -2  -9 -10    5.70   25.89
  -1  -9 -10  -45.24   29.24
   0  -9 -10   -2.48   28.21
   1  -9 -10  -38.65   29.00
   2  -9 -10   40.25   12.90
   3  -9 -10   37.38   30.02
   4  -9 -10   27.99   28.92
   5  -9 -10  -29.18   30.46
   6  -9 -10  -25.34   33.15
 -14  -9 -11   36.81   15.21
 -13  -9 -11    5.89   31.26
 -12  -9 -11  -25.94   32.56
 -11  -9 -11   23.02   29.92
 -10  -9 -11  -35.37   32.10
  -9  -9 -11   33.28   28.51
  -8  -9 -11   15.77   28.68
  -7  -9 -11   42.67   29.64
  -6  -9 -11    2.88   28.20
  -5  -9 -11   20.23   29.26
  -4  -9 -11    4.29   29.88
  -3  -9 -11   47.33   12.05
  -2  -9 -11   14.57   27.73
  -1  -9 -11  -13.29   28.17
   0  -9 -11   11.50   28.62
   1  -9 -11  -43.41   29.58
   2  -9 -11   48.86   13.44
   3  -9 -11    3.68   30.68
   4  -9 -11  -23.08   30.98
   5  -9 -11   34.38   30.14
 -14  -9 -12   16.37   33.28
 -13  -9 -12   -8.72   33.14
 -12  -9 -12  -34.11   33.08
 -11  -9 -12  -84.83   33.88
 -10  -9 -12   17.77   30.21
  -9  -9 -12  -55.93   30.85
  -8  -9 -12   -6.47   29.36
  -7  -9 -12   28.91   12.98
  -6  -9 -12   19.19   27.82
  -5  -9 -12   16.46   29.56
  -4  -9 -12  298.25   22.65
  -3  -9 -12   94.76   13.31
  -2  -9 -12   70.95   13.41
  -1  -9 -12  -21.03   31.05
   0  -9 -12  144.77   13.71
   1  -9 -12   16.79   30.39
   2  -9 -12   25.18   29.00
   3  -9 -12   10.93   31.03
   4  -9 -12   -3.11   31.73
 -13  -9 -13   46.84   14.59
 -12  -9 -13   -9.44   32.56
 -11  -9 -13   14.71   22.55
 -10  -9 -13   33.51   31.02
  -9  -9 -13   -7.55   30.40
  -8  -9 -13    1.41   30.19
  -7  -9 -13   12.21   29.73
  -6  -9 -13   28.82   12.93
  -5  -9 -13  -17.38   29.14
  -4  -9 -13   42.01   31.46
  -3  -9 -13   76.35   13.77
  -2  -9 -13   21.56   28.62
  -1  -9 -13  -17.90   30.14
   0  -9 -13   33.80   27.26
   1  -9 -13  -29.43   31.80
   2  -9 -13    3.00   29.44
   3  -9 -13    4.96   31.79
 -13  -9 -14    6.18   33.42
 -12  -9 -14   28.07   31.55
 -11  -9 -14  -12.13   33.08
 -10  -9 -14   41.65   30.90
  -9  -9 -14   17.10   30.09
  -8  -9 -14    1.10   30.70
  -7  -9 -14  -48.79   31.54
  -6  -9 -14  -13.55   31.51
  -5  -9 -14  -50.74   31.98
  -4  -9 -14   12.09   29.80
  -3  -9 -14  167.75   15.67
  -2  -9 -14   28.11   29.28
  -1  -9 -14    8.18   29.25
   0  -9 -14  -23.20   32.23
   1  -9 -14    5.48   31.47
   2  -9 -14  -43.16   34.31
 -12  -9 -15   18.06   35.42
 -11  -9 -15  -60.35   36.66
 -10  -9 -15  -27.41   34.56
  -9  -9 -15   11.83   31.15
  -8  -9 -15  -11.52   32.30
  -7  -9 -15    1.81   31.02
  -6  -9 -15   -2.27   31.87
  -5  -9 -15   78.56   13.68
  -4  -9 -15  -38.26   32.94
  -3  -9 -15  -16.37   31.75
  -2  -9 -15   41.57   29.62
  -1  -9 -15   89.89   14.35
   0  -9 -15   10.61   30.88
 -10  -9 -16   10.48   32.61
  -9  -9 -16  -21.08   33.94
  -8  -9 -16  -29.09   31.78
  -7  -9 -16  -29.93   32.67
  -6  -9 -16   43.52   31.37
  -5  -9 -16  -30.72   33.31
  -4  -9 -16  -22.49   31.96
  -3  -9 -16   36.62   30.80
  -2  -9 -16    2.01   32.34
  -8  -9 -17   43.33   32.67
  -7  -9 -17   32.64   33.04
  -6  -9 -17  -51.69   35.42
  -5  -9 -17  -13.61   33.63
  -4  -9 -17  -22.41   34.62
   1 -10  15   21.16   32.13
   2 -10  15   -8.00   31.65
   3 -10  15   21.25   23.04
   4 -10  15   43.08   32.48
   5 -10  15   26.08   32.96
  -2 -10  14    4.83   32.78
  -1 -10  14   39.33   31.18
   0 -10  14  -47.95   32.32
   1 -10  14   22.98   13.98
   2 -10  14   44.68   14.74
   3 -10  14   27.43   14.14
   4 -10  14   26.53   21.64
   5 -10  14   16.93   32.20
   6 -10  14   50.44   14.70
   7 -10  14  -24.16   33.71
  -4 -10  13  -14.16   32.87
  -3 -10  13   10.41   14.23
  -2 -10  13   30.32   20.96
  -1 -10  13   26.39   30.29
   0 -10  13   34.23   30.52
   1 -10  13   19.63   30.47
   2 -10  13  -23.28   32.49
   3 -10  13   18.42   21.52
   4 -10  13  -25.00   32.57
   5 -10  13  -32.47   32.19
   6 -10  13   35.10   33.08
   7 -10  13   25.63   31.29
   8 -10  13  -16.64   32.94
  -5 -10  12   -8.21   31.61
  -4 -10  12  -67.17   33.08
  -3 -10  12   64.97   13.91
  -2 -10  12  -52.22   32.11
  -1 -10  12  -12.99   30.46
   0 -10  12  -43.64   31.35
   1 -10  12   14.54   31.48
   2 -10  12    1.04   28.65
   3 -10  12   31.65   29.78
   4 -10  12   23.36   32.33
   5 -10  12   -3.10   30.58
   6 -10  12  -17.40   31.53
   7 -10  12   12.66   31.98
   8 -10  12   37.51   14.33
   9 -10  12  -47.30   34.46
  -6 -10  11  -12.88   30.45
  -5 -10  11   10.64   32.24
  -4 -10  11   43.99   29.72
  -3 -10  11   19.34   27.45
  -2 -10  11    8.92   31.73
  -1 -10  11  -10.09   30.13
   0 -10  11   -8.24   29.53
   1 -10  11   76.05   13.86
   2 -10  11  -40.69   31.24
   3 -10  11   43.84   30.74
   4 -10  11   10.61   30.13
   5 -10  11   36.00   29.84
   6 -10  11   42.01   29.00
   7 -10  11   26.54   13.66
   8 -10  11    5.47   29.78
   9 -10  11   18.09   31.75
  -7 -10  10   19.61   30.69
  -6 -10  10   21.80   29.99
  -5 -10  10   33.97   13.62
  -4 -10  10  -16.20   30.16
  -3 -10  10   17.27   29.28
  -2 -10  10   27.89   13.32
  -1 -10  10  -24.07   29.41
   0 -10  10  -19.47   28.53
   1 -10  10   36.66   27.70
   2 -10  10   41.02   12.99
   3 -10  10   -1.03   30.76
   4 -10  10   14.10   29.61
   5 -10  10  -18.04   29.82
   6 -10  10    4.84   29.20
   7 -10  10   17.60   29.58
   8 -10  10  -15.10   29.92
   9 -10  10    6.72   32.77
  10 -10  10   21.08   22.56
  -8 -10   9   15.18   17.92
  -7 -10   9   34.78   31.75
  -6 -10   9    5.48   20.93
  -5 -10   9   14.88   29.72
  -4 -10   9   89.64   13.57
  -3 -10   9   10.59   30.99
  -2 -10   9   94.00   12.79
  -1 -10   9    5.25   27.96
   0 -10   9  191.15   17.74
   1 -10   9   23.75   29.06
   2 -10   9   36.82   28.27
   3 -10   9   87.51   13.44
   4 -10   9  221.65   18.26
   5 -10   9   64.55   13.32
   6 -10   9   -7.85   30.99
   7 -10   9   -4.29   31.35
   8 -10   9   16.81   30.55
   9 -10   9  -15.73   30.96
  10 -10   9   44.06   31.55
  -9 -10   8  -27.45   35.38
  -8 -10   8   21.02   31.21
  -7 -10   8   20.22   29.71
  -6 -10   8  -45.70   30.60
  -5 -10   8   18.90   20.61
  -4 -10   8   -4.33   28.56
  -3 -10   8   18.68   27.48
  -2 -10   8  -42.79   28.94
  -1 -10   8    7.57   27.48
   0 -10   8   26.43   12.05
   1 -10   8   31.37   11.77
   2 -10   8   15.97   27.29
   3 -10   8   14.39   28.43
   4 -10   8   56.18   13.09
   5 -10   8   46.72   32.14
   6 -10   8   24.95   29.87
   7 -10   8  -15.48   30.88
   8 -10   8   77.49   13.78
   9 -10   8   31.78   14.18
  10 -10   8  -23.87   31.96
 -10 -10   7   17.31   31.86
  -9 -10   7   37.18   14.80
  -8 -10   7   20.36   30.02
  -7 -10   7    2.69   29.55
  -6 -10   7  -38.56   30.86
  -5 -10   7   18.26   20.41
  -4 -10   7   32.02   26.62
  -3 -10   7   10.61   27.54
  -2 -10   7   61.05   11.87
  -1 -10   7   -6.30   25.54
   0 -10   7  -14.66   25.70
   1 -10   7  146.90   12.46
   2 -10   7  -28.61   27.63
   3 -10   7    5.34   26.76
   4 -10   7  144.50   13.57
   5 -10   7   31.15   12.28
   6 -10   7   27.31   30.51
   7 -10   7   -4.42   29.05
   8 -10   7  -25.18   30.10
   9 -10   7  -20.90   30.88
  10 -10   7   10.28   32.56
  11 -10   7  -29.67   34.19
 -10 -10   6   63.73   14.81
  -9 -10   6   41.81   14.29
  -8 -10   6   22.28   20.72
  -7 -10   6    3.93   31.87
  -6 -10   6  111.95   13.28
  -5 -10   6    2.34   27.74
  -4 -10   6   97.69   12.29
  -3 -10   6   12.13   25.61
  -2 -10   6    1.61   24.51
  -1 -10   6   77.76   11.99
   0 -10   6  -18.34   25.14
   1 -10   6   59.28   11.57
   2 -10   6   39.64   26.62
   3 -10   6   43.96   12.21
   4 -10   6   20.52   27.23
   5 -10   6   -4.05   27.14
   6 -10   6   63.77   12.86
   7 -10   6   10.63   29.38
   8 -10   6   36.32   12.87
   9 -10   6   37.24   30.95
  10 -10   6  -12.81   31.92
  11 -10   6   -6.60   32.65
 -11 -10   5  -25.63   33.00
 -10 -10   5  -22.02   32.16
  -9 -10   5  -23.29   31.84
  -8 -10   5   25.98   28.40
  -7 -10   5   16.49   28.76
  -6 -10   5   30.89   20.84
  -5 -10   5   34.49   25.92
  -4 -10   5  105.41   12.31
  -3 -10   5   33.06   25.61
  -2 -10   5   47.20   11.47
  -1 -10   5  109.59   11.65
   0 -10   5   11.84   24.56
   1 -10   5   46.11   11.42
   2 -10   5   19.57   14.51
   3 -10   5   67.41   11.70
   4 -10   5   38.90   26.78
   5 -10   5   15.90   26.58
   6 -10   5  -28.22   28.08
   7 -10   5   -4.46   29.30
   8 -10   5   12.36   28.96
   9 -10   5   41.88   13.32
  10 -10   5   25.16   31.80
  11 -10   5    4.24   32.91
 -12 -10   4   30.74   23.97
 -11 -10   4   40.82   29.99
 -10 -10   4   14.80   29.60
  -9 -10   4  -18.58   29.88
  -8 -10   4  -21.82   28.81
  -7 -10   4   -2.77   28.90
  -6 -10   4   -1.24   25.99
  -5 -10   4   51.84   12.14
  -4 -10   4  122.43   12.47
  -3 -10   4   21.35   24.77
  -2 -10   4  283.83   19.95
  -1 -10   4   -2.37   25.13
   0 -10   4  177.74   15.18
   1 -10   4   56.48   11.02
   2 -10   4  260.56   19.51
   3 -10   4   60.89   11.80
   4 -10   4  175.54   16.22
   5 -10   4   22.82   25.95
   6 -10   4  -64.69   29.69
   7 -10   4  -15.86   29.23
   8 -10   4   88.01   14.33
   9 -10   4   23.04   30.04
  10 -10   4   29.36   31.36
  11 -10   4   21.76   32.66
 -12 -10   3   -0.30   30.84
 -11 -10   3   24.24   31.59
 -10 -10   3   36.22   29.41
  -9 -10   3   34.95   27.68
  -8 -10   3   43.10   12.40
  -7 -10   3   28.99   25.21
  -6 -10   3  -11.34   26.43
  -5 -10   3  143.99   13.17
  -4 -10   3  -16.02   24.77
  -3 -10   3   22.47   23.00
  -2 -10   3  200.08   17.57
  -1 -10   3    3.50   22.89
   0 -10   3   89.00   11.24
   1 -10   3    3.45   24.06
   2 -10   3  132.02   12.89
   3 -10   3   89.03   11.78
   4 -10   3  -18.82   28.20
   5 -10   3  -11.38   26.46
   6 -10   3   16.48   28.71
   7 -10   3    0.51   28.62
   8 -10   3  -35.03   31.65
   9 -10   3   30.27   29.41
  10 -10   3   43.26   31.18
  11 -10   3   17.78   32.41
 -13 -10   2   26.08   34.36
 -12 -10   2   -7.78   32.81
 -11 -10   2  -30.04   32.86
 -10 -10   2  -15.40   30.02
  -9 -10   2   -1.78   29.31
  -8 -10   2   20.25   19.54
  -7 -10   2   63.16   12.57
  -6 -10   2    3.50   26.42
  -5 -10   2  103.81   11.78
  -4 -10   2  166.07   15.11
  -3 -10   2    5.46   22.52
  -2 -10   2   -6.15   23.33
  -1 -10   2  183.98   14.89
   0 -10   2   31.46   23.44
   1 -10   2    0.78   25.72
   2 -10   2   88.11   11.17
   3 -10   2   54.38   11.52
   4 -10   2  -27.19   27.43
   5 -10   2  -16.21   26.27
   6 -10   2    3.33   27.64
   7 -10   2   46.03   13.32
   8 -10   2   65.89   13.70
   9 -10   2   13.21   28.91
  10 -10   2   -7.98   31.64
  11 -10   2   14.82   30.91
 -13 -10   1   22.71   33.89
 -12 -10   1   14.71   31.57
 -11 -10   1   12.02   32.41
 -10 -10   1   37.26   29.41
  -9 -10   1   22.15   15.16
  -8 -10   1   27.72   12.42
  -7 -10   1  -32.82   27.67
  -6 -10   1  247.36   20.61
  -5 -10   1   54.93   11.12
  -4 -10   1  103.63   11.10
  -3 -10   1  238.00   18.83
  -2 -10   1  357.76   25.84
  -1 -10   1  -66.64   24.56
   0 -10   1   26.64   22.67
   1 -10   1  137.51   12.39
   2 -10   1   14.69   23.01
   3 -10   1   45.24   11.09
   4 -10   1  -38.48   28.16
   5 -10   1  -39.36   28.21
   6 -10   1   30.99   12.00
   7 -10   1   27.82   28.53
   8 -10   1   21.18   20.53
   9 -10   1   23.78   29.17
  10 -10   1  -18.10   32.09
 -13 -10   0  -22.07   33.59
 -12 -10   0   41.52   31.17
 -11 -10   0    9.99   31.74
 -10 -10   0  -43.97   32.32
  -9 -10   0   53.53   13.23
  -8 -10   0  -63.44   29.32
  -7 -10   0  103.81   12.31
  -6 -10   0   19.42   25.11
  -5 -10   0   21.16   24.49
  -4 -10   0   23.99   16.38
  -3 -10   0   21.38   22.54
  -2 -10   0  527.58   28.42
  -1 -10   0  -44.22   23.79
   0 -10   0  147.28   12.39
   1 -10   0   30.51   23.19
   2 -10   0   28.22   23.89
   3 -10   0  -39.19   25.59
   4 -10   0   47.01   11.29
   5 -10   0   15.98   25.66
   6 -10   0   36.79   13.00
   7 -10   0   78.01   13.50
   8 -10   0   29.29   29.39
   9 -10   0    1.47   31.13
  10 -10   0   42.91   31.30
 -14 -10  -1   13.95   24.06
 -13 -10  -1   23.43   32.28
 -12 -10  -1  -36.35   32.07
 -11 -10  -1   -4.32   29.19
 -10 -10  -1   33.78   28.34
  -9 -10  -1  242.73   21.95
  -8 -10  -1   58.37   12.30
  -7 -10  -1   27.02   11.67
  -6 -10  -1  154.18   14.77
  -5 -10  -1   -2.57   23.93
  -4 -10  -1   33.02   22.58
  -3 -10  -1  -20.13   22.40
  -2 -10  -1  177.38   17.52
  -1 -10  -1  172.63   17.19
   0 -10  -1  121.55   10.36
   1 -10  -1  136.38   12.15
   2 -10  -1  362.69   27.48
   3 -10  -1   11.15   25.28
   4 -10  -1    1.23   26.73
   5 -10  -1   40.02   12.29
   6 -10  -1   52.12   12.52
   7 -10  -1   15.59   29.03
   8 -10  -1    6.91   28.47
   9 -10  -1   64.56   14.17
  10 -10  -1  -65.86   34.85
 -14 -10  -2   27.59   32.98
 -13 -10  -2   29.11   32.69
 -12 -10  -2   32.39   14.45
 -11 -10  -2   22.80   13.59
 -10 -10  -2    2.67   31.67
  -9 -10  -2   31.95   12.59
  -8 -10  -2   32.95   26.62
  -7 -10  -2   -2.43   26.59
  -6 -10  -2   42.15   10.74
  -5 -10  -2   45.65   10.23
  -4 -10  -2   74.06   10.14
  -3 -10  -2   31.41   23.25
  -2 -10  -2    6.86   10.01
  -1 -10  -2    7.79   16.22
   0 -10  -2  185.51   17.26
   1 -10  -2   47.36   10.92
   2 -10  -2  -18.52   26.13
   3 -10  -2   15.48   25.76
   4 -10  -2    5.11   28.42
   5 -10  -2   95.40   12.81
   6 -10  -2  -23.86   29.75
   7 -10  -2   -7.50   30.17
   8 -10  -2   26.05   20.94
   9 -10  -2  -25.50   32.28
 -14 -10  -3  -27.63   35.41
 -13 -10  -3  -30.71   33.78
 -12 -10  -3   23.85   33.85
 -11 -10  -3    7.95   30.00
 -10 -10  -3   29.18   28.68
  -9 -10  -3   23.75   27.18
  -8 -10  -3   67.22   12.09
  -7 -10  -3   24.14   25.08
  -6 -10  -3  -26.58   26.13
  -5 -10  -3   -3.94   23.50
  -4 -10  -3   24.96   22.74
  -3 -10  -3   80.71   10.81
  -2 -10  -3  -12.05   23.35
  -1 -10  -3   20.09   21.60
   0 -10  -3   88.50   10.57
   1 -10  -3  125.95   11.48
   2 -10  -3  209.59   19.08
   3 -10  -3  -45.74   27.27
   4 -10  -3    5.94   27.23
   5 -10  -3   96.71   13.10
   6 -10  -3   94.09   13.41
   7 -10  -3  -20.19   29.53
   8 -10  -3   26.84   12.93
   9 -10  -3   28.33   13.84
 -14 -10  -4  -38.27   33.81
 -13 -10  -4  -47.78   34.13
 -12 -10  -4   -3.41   32.10
 -11 -10  -4   25.78   31.59
 -10 -10  -4  112.63   14.24
  -9 -10  -4    8.15   27.05
  -8 -10  -4   96.01   12.99
  -7 -10  -4   35.14   26.96
  -6 -10  -4   90.98   11.42
  -5 -10  -4  107.70   11.39
  -4 -10  -4  152.61   13.93
  -3 -10  -4  148.08   14.26
  -2 -10  -4   24.11   10.15
  -1 -10  -4  104.60   10.63
   0 -10  -4  -12.25   23.70
   1 -10  -4   33.97   24.30
   2 -10  -4   -9.41   25.99
   3 -10  -4   37.68   11.84
   4 -10  -4    4.99   15.53
   5 -10  -4   79.83   12.63
   6 -10  -4  -15.19   29.98
   7 -10  -4   -8.14   28.53
   8 -10  -4   20.92   29.44
   9 -10  -4   -1.48   32.93
 -14 -10  -5   22.23   31.85
 -13 -10  -5  -58.89   34.13
 -12 -10  -5    2.69   31.69
 -11 -10  -5  -34.66   31.22
 -10 -10  -5  109.56   13.91
  -9 -10  -5   38.74   27.58
  -8 -10  -5   21.47   12.30
  -7 -10  -5   27.46   19.20
  -6 -10  -5   18.62   11.45
  -5 -10  -5   24.87   17.65
  -4 -10  -5   -0.06   24.51
  -3 -10  -5   69.69   10.68
  -2 -10  -5   28.25   22.89
  -1 -10  -5    5.95   24.65
   0 -10  -5   71.39   11.67
   1 -10  -5   59.15   11.21
   2 -10  -5   18.23   15.12
   3 -10  -5   22.78   19.40
   4 -10  -5   78.69   13.19
   5 -10  -5   23.63   29.17
   6 -10  -5   -2.41   29.93
   7 -10  -5   -1.33   30.10
   8 -10  -5  -11.85   30.60
 -14 -10  -6   35.11   34.40
 -13 -10  -6   13.81   32.40
 -12 -10  -6   40.46   31.33
 -11 -10  -6   68.45   13.95
 -10 -10  -6   39.26   29.07
  -9 -10  -6   19.04   28.63
  -8 -10  -6  150.79   13.07
  -7 -10  -6  172.93   16.20
  -6 -10  -6    5.44   25.28
  -5 -10  -6   37.57   25.16
  -4 -10  -6  316.87   28.41
  -3 -10  -6   67.24   11.05
  -2 -10  -6   63.60   11.40
  -1 -10  -6   80.78   11.10
   0 -10  -6  181.84   15.67
   1 -10  -6  249.90   20.13
   2 -10  -6    9.21   26.38
   3 -10  -6  -32.41   28.17
   4 -10  -6   19.15   28.30
   5 -10  -6   35.68   12.48
   6 -10  -6   26.38   28.16
   7 -10  -6   77.46   14.57
   8 -10  -6   26.65   31.62
 -14 -10  -7   44.33   31.67
 -13 -10  -7   -5.53   32.90
 -12 -10  -7    3.67   30.34
 -11 -10  -7   43.74   29.89
 -10 -10  -7   27.70   30.78
  -9 -10  -7   97.64   13.46
  -8 -10  -7  -29.86   28.35
  -7 -10  -7   46.60   11.99
  -6 -10  -7   83.76   12.01
  -5 -10  -7   33.15   11.72
  -4 -10  -7   55.55   11.30
  -3 -10  -7   14.51   10.90
  -2 -10  -7  160.61   15.77
  -1 -10  -7    2.14   26.39
   0 -10  -7   35.73   25.08
   1 -10  -7  -24.08   28.48
   2 -10  -7   10.24   27.92
   3 -10  -7   52.05   12.21
   4 -10  -7  -25.78   31.06
   5 -10  -7   16.07   28.96
   6 -10  -7   91.17   14.15
   7 -10  -7   27.94   30.05
 -14 -10  -8  -20.79   33.25
 -13 -10  -8   50.11   15.47
 -12 -10  -8   24.52   22.80
 -11 -10  -8   96.81   14.96
 -10 -10  -8  -44.01   30.95
  -9 -10  -8  198.24   18.07
  -8 -10  -8  107.60   13.17
  -7 -10  -8   -5.17   28.87
  -6 -10  -8   91.14   12.14
  -5 -10  -8   31.92   12.03
  -4 -10  -8   -2.98   26.33
  -3 -10  -8  170.32   16.59
  -2 -10  -8   20.15   25.23
  -1 -10  -8  -40.08   26.55
   0 -10  -8   -0.82   26.13
   1 -10  -8   83.49   12.50
   2 -10  -8  126.93   13.10
   3 -10  -8   38.00   28.34
   4 -10  -8   86.47   13.86
   5 -10  -8  -20.75   31.04
   6 -10  -8   11.52   31.19
 -14 -10  -9   24.35   34.19
 -13 -10  -9  -39.35   34.46
 -12 -10  -9  114.71   14.92
 -11 -10  -9  -30.77   32.29
 -10 -10  -9  -58.40   31.66
  -9 -10  -9   18.92   29.50
  -8 -10  -9  -34.00   29.20
  -7 -10  -9  177.84   17.49
  -6 -10  -9   42.13   28.84
  -5 -10  -9  243.18   21.34
  -4 -10  -9   61.73   12.51
  -3 -10  -9   -0.55   28.49
  -2 -10  -9  -11.24   28.25
  -1 -10  -9   36.62   26.54
   0 -10  -9  172.40   16.84
   1 -10  -9   50.22   12.69
   2 -10  -9    9.11   19.12
   3 -10  -9   34.15   26.66
   4 -10  -9  -65.80   30.79
   5 -10  -9   -1.15   29.49
   6 -10  -9  -28.10   32.54
 -14 -10 -10   18.24   33.68
 -13 -10 -10   28.57   33.03
 -12 -10 -10  -56.58   34.27
 -11 -10 -10  -19.12   31.56
 -10 -10 -10  -63.10   32.40
  -9 -10 -10   32.11   29.75
  -8 -10 -10    7.73   31.38
  -7 -10 -10   51.27   13.30
  -6 -10 -10    0.36   27.96
  -5 -10 -10   -0.68   27.02
  -4 -10 -10   13.69   27.30
  -3 -10 -10   -1.51   27.36
  -2 -10 -10   66.09   12.69
  -1 -10 -10   12.44   27.07
   0 -10 -10   55.59   12.53
   1 -10 -10  -79.64   29.51
   2 -10 -10   10.69   26.38
   3 -10 -10   11.40   31.84
   4 -10 -10   18.37   15.01
   5 -10 -10   31.62   31.53
 -13 -10 -11   18.78   33.16
 -12 -10 -11   22.10   31.62
 -11 -10 -11   14.44   21.90
 -10 -10 -11    6.64   30.27
  -9 -10 -11   28.43   30.50
  -8 -10 -11  -19.95   31.22
  -7 -10 -11   48.10   13.13
  -6 -10 -11   -6.41   28.42
  -5 -10 -11   27.80   28.84
  -4 -10 -11   75.15   13.45
  -3 -10 -11   11.98   29.50
  -2 -10 -11   64.59   13.13
  -1 -10 -11   95.43   13.29
   0 -10 -11   25.05   28.45
   1 -10 -11   -5.39   27.88
   2 -10 -11    3.73   29.58
   3 -10 -11   47.52   13.77
   4 -10 -11   24.12   29.76
 -13 -10 -12   25.48   33.97
 -12 -10 -12   -4.40   32.41
 -11 -10 -12  -32.34   34.08
 -10 -10 -12   23.57   30.13
  -9 -10 -12   42.33   31.19
  -8 -10 -12    7.09   30.70
  -7 -10 -12  -19.06   31.01
  -6 -10 -12   23.28   17.28
  -5 -10 -12   10.64   28.90
  -4 -10 -12   91.68   13.22
  -3 -10 -12   18.51   28.29
  -2 -10 -12   12.45   27.92
  -1 -10 -12   -0.63   29.76
   0 -10 -12  -19.89   30.96
   1 -10 -12  -32.52   30.39
   2 -10 -12  -41.93   31.88
   3 -10 -12  -10.41   33.11
 -12 -10 -13   10.53   35.00
 -11 -10 -13  -27.54   33.94
 -10 -10 -13  -20.45   33.08
  -9 -10 -13   10.20   30.09
  -8 -10 -13   46.27   13.95
  -7 -10 -13   -3.19   29.89
  -6 -10 -13  100.98   13.92
  -5 -10 -13  -71.75   31.07
  -4 -10 -13  -12.43   30.65
  -3 -10 -13   31.08   31.49
  -2 -10 -13   44.00   30.57
  -1 -10 -13  183.94   16.55
   0 -10 -13   23.26   31.28
   1 -10 -13   25.66   30.87
   2 -10 -13   65.88   13.84
 -12 -10 -14   25.68   32.98
 -11 -10 -14   -8.66   32.49
 -10 -10 -14   78.59   14.92
  -9 -10 -14   16.67   31.29
  -8 -10 -14   31.36   30.89
  -7 -10 -14  -38.70   32.59
  -6 -10 -14  -45.87   31.26
  -5 -10 -14   12.09   30.54
  -4 -10 -14   -0.57   30.30
  -3 -10 -14  124.29   14.45
  -2 -10 -14   14.63   29.95
  -1 -10 -14   27.38   29.95
   0 -10 -14   15.96   30.66
 -11 -10 -15  -24.79   32.98
 -10 -10 -15  -34.24   34.11
  -9 -10 -15   34.78   30.32
  -8 -10 -15  -53.06   33.86
  -7 -10 -15   17.22   30.82
  -6 -10 -15  -26.23   31.95
  -5 -10 -15   36.90   31.23
  -4 -10 -15   65.63   14.87
  -3 -10 -15   22.72   31.81
  -2 -10 -15  -65.33   34.03
  -1 -10 -15    2.64   31.53
  -9 -10 -16    0.47   33.69
  -8 -10 -16  -46.27   33.80
  -7 -10 -16  -18.68   34.07
  -6 -10 -16   47.50   14.52
  -5 -10 -16   14.49   32.10
  -4 -10 -16   12.44   33.88
   0 -11  14  -46.12   35.00
   1 -11  14  -26.74   32.88
   2 -11  14   -2.14   33.42
   3 -11  14  -21.17   32.27
   4 -11  14  -23.75   32.84
  -2 -11  13   10.58   30.97
  -1 -11  13   34.74   31.55
   0 -11  13    9.64   35.04
   1 -11  13    7.53   32.55
   2 -11  13   23.09   30.40
   3 -11  13    8.51   31.04
   4 -11  13   34.95   30.95
   5 -11  13   15.99   33.99
   6 -11  13    2.56   32.11
  -4 -11  12   25.20   22.46
  -3 -11  12   32.93   33.23
  -2 -11  12   32.24   21.68
  -1 -11  12  -34.40   33.52
   0 -11  12   26.40   17.89
   1 -11  12    1.32   30.56
   2 -11  12  -39.29   32.00
   3 -11  12  -13.41   30.79
   4 -11  12   24.04   13.62
   5 -11  12   18.09   21.91
   6 -11  12   25.07   29.41
   7 -11  12    8.64   30.13
  -5 -11  11   27.85   14.44
  -4 -11  11   20.58   32.12
  -3 -11  11  -46.43   33.91
  -2 -11  11   24.26   13.80
  -1 -11  11   21.90   30.74
   0 -11  11   39.03   32.24
   1 -11  11  -18.44   31.30
   2 -11  11   -0.85   30.40
   3 -11  11   -0.70   31.07
   4 -11  11    0.16   30.95
   5 -11  11   34.81   28.84
   6 -11  11  -54.63   33.60
   7 -11  11   59.17   14.27
   8 -11  11   23.42   15.68
  -6 -11  10   98.22   13.72
  -5 -11  10   82.84   13.77
  -4 -11  10   33.60   28.07
  -3 -11  10   38.87   28.95
  -2 -11  10  -32.20   31.17
  -1 -11  10   52.10   13.58
   0 -11  10   61.67   13.43
   1 -11  10   -1.69   29.49
   2 -11  10  114.35   14.43
   3 -11  10   14.72   29.58
   4 -11  10   23.84   21.06
   5 -11  10   56.45   13.99
   6 -11  10   25.57   30.74
   7 -11  10  -48.14   32.80
   8 -11  10   39.83   28.81
   9 -11  10   10.33   32.33
  -7 -11   9   19.01   30.94
  -6 -11   9   22.14   21.48
  -5 -11   9  -18.06   30.07
  -4 -11   9   26.30   29.87
  -3 -11   9    5.24   28.26
  -2 -11   9   33.04   27.63
  -1 -11   9  -41.83   30.07
   0 -11   9    0.36   29.88
   1 -11   9   41.28   13.17
   2 -11   9   27.12   28.80
   3 -11   9   23.65   29.72
   4 -11   9   40.38   27.61
   5 -11   9    5.70   30.63
   6 -11   9   33.14   13.65
   7 -11   9   -8.59   31.04
   8 -11   9    6.36   22.54
   9 -11   9   47.65   31.83
  -8 -11   8  -22.11   32.93
  -7 -11   8  -10.31   30.32
  -6 -11   8   31.79   13.55
  -5 -11   8   97.91   13.59
  -4 -11   8  106.15   13.54
  -3 -11   8  -14.01   29.26
  -2 -11   8  -26.16   31.04
  -1 -11   8  163.70   15.04
   0 -11   8   67.68   13.02
   1 -11   8  -22.36   28.60
   2 -11   8   13.93   30.15
   3 -11   8  163.80   15.48
   4 -11   8   64.93   13.36
   5 -11   8   -5.81   29.87
   6 -11   8   -0.28   29.58
   7 -11   8   35.49   30.43
   8 -11   8   22.23   13.45
   9 -11   8  -25.11   32.94
  -9 -11   7   30.72   31.55
  -8 -11   7    5.64   31.79
  -7 -11   7  -23.19   30.61
  -6 -11   7    9.99   32.46
  -5 -11   7  -25.10   28.98
  -4 -11   7  -13.43   28.55
  -3 -11   7  -14.52   29.13
  -2 -11   7   34.90   27.71
  -1 -11   7   14.12   27.68
   0 -11   7   20.57   12.09
   1 -11   7   22.07   28.90
   2 -11   7   13.98   27.06
   3 -11   7   17.97   12.50
   4 -11   7  -12.94   30.20
   5 -11   7   -9.81   29.90
   6 -11   7   33.95   13.12
   7 -11   7   17.67   29.87
   8 -11   7   -2.48   30.78
   9 -11   7  -23.92   31.66
  10 -11   7   46.92   33.49
 -10 -11   6   26.87   31.83
  -9 -11   6   40.97   27.93
  -8 -11   6   27.31   13.29
  -7 -11   6   -8.49   28.01
  -6 -11   6   39.02   13.38
  -5 -11   6   23.90   30.35
  -4 -11   6  124.09   13.06
  -3 -11   6   22.30   27.43
  -2 -11   6   52.80   12.05
  -1 -11   6   -9.95   26.27
   0 -11   6  -10.79   27.65
   1 -11   6   37.17   25.89
   2 -11   6   21.39   28.20
   3 -11   6  -12.61   28.73
   4 -11   6    2.03   27.95
   5 -11   6   64.02   12.68
   6 -11   6   28.76   19.28
   7 -11   6  -11.82   30.28
   8 -11   6  -16.41   31.01
   9 -11   6   30.54   30.48
  10 -11   6   42.80   31.27
 -10 -11   5   31.80   21.37
  -9 -11   5  -28.43   31.64
  -8 -11   5    5.43   28.70
  -7 -11   5   31.42   30.00
  -6 -11   5  -49.40   29.74
  -5 -11   5   20.33   28.41
  -4 -11   5   19.75   29.08
  -3 -11   5   92.31   12.58
  -2 -11   5  145.98   14.51
  -1 -11   5   98.47   12.50
   0 -11   5  198.97   19.60
   1 -11   5   25.41   12.12
   2 -11   5  106.44   12.77
   3 -11   5   21.12   27.70
   4 -11   5   21.70   27.81
   5 -11   5  -25.60   29.08
   6 -11   5   -9.91   28.62
   7 -11   5   22.64   29.04
   8 -11   5  -16.96   31.44
   9 -11   5    0.34   31.42
  10 -11   5   16.04   31.91
 -11 -11   4  -17.46   33.85
 -10 -11   4   34.02   29.94
  -9 -11   4  -26.32   30.56
  -8 -11   4  -12.79   29.56
  -7 -11   4   22.65   15.96
  -6 -11   4   24.18   27.56
  -5 -11   4  -17.78   27.05
  -4 -11   4   25.78   26.98
  -3 -11   4  -17.98   27.96
  -2 -11   4   94.72   12.41
  -1 -11   4   41.65   11.32
   0 -11   4   90.22   11.92
   1 -11   4    2.55   26.34
   2 -11   4  -10.11   26.95
   3 -11   4   52.23   11.84
   4 -11   4   13.15   27.49
   5 -11   4    5.06   27.04
   6 -11   4   18.44   14.23
   7 -11   4  -44.30   30.19
   8 -11   4   37.22   31.18
   9 -11   4   27.69   31.40
  10 -11   4  -18.38   33.46
 -11 -11   3    4.14   31.88
 -10 -11   3    9.02   30.07
  -9 -11   3   27.55   28.26
  -8 -11   3  -48.19   32.56
  -7 -11   3    3.12   28.70
  -6 -11   3  102.26   12.48
  -5 -11   3   -0.09   27.25
  -4 -11   3   42.01   11.96
  -3 -11   3  208.70   20.06
  -2 -11   3   49.91   11.72
  -1 -11   3  -15.34   25.46
   0 -11   3   25.67   25.36
   1 -11   3  385.14   30.11
   2 -11   3   -5.96   25.99
   3 -11   3  -34.86   26.45
   4 -11   3   -3.70   28.50
   5 -11   3  -28.14   28.65
   6 -11   3   14.42   16.91
   7 -11   3   -0.57   30.16
   8 -11   3   18.71   14.99
   9 -11   3  -32.15   32.71
  10 -11   3   27.46   24.20
 -12 -11   2  -15.18   34.79
 -11 -11   2    1.87   34.88
 -10 -11   2  -81.09   31.26
  -9 -11   2   22.67   28.51
  -8 -11   2   26.55   26.71
  -7 -11   2   62.72   13.11
  -6 -11   2   -6.33   27.44
  -5 -11   2    0.53   26.44
  -4 -11   2  215.00   19.55
  -3 -11   2    0.47   25.55
  -2 -11   2   10.06   24.90
  -1 -11   2  246.97   20.53
   0 -11   2    2.80   24.84
   1 -11   2   44.02   11.54
   2 -11   2   16.84   26.35
   3 -11   2  -16.07   27.36
   4 -11   2   31.56   25.18
   5 -11   2   24.07   18.47
   6 -11   2  -20.99   28.90
   7 -11   2   -8.99   29.06
   8 -11   2   25.55   31.01
   9 -11   2   -7.61   30.88
  10 -11   2    2.67   31.13
 -12 -11   1  -58.90   35.50
 -11 -11   1    0.62   30.90
 -10 -11   1   41.89   30.55
  -9 -11   1   63.46   13.93
  -8 -11   1   17.58   27.36
  -7 -11   1   17.04   27.81
  -6 -11   1   65.17   11.89
  -5 -11   1   25.36   25.07
  -4 -11   1  224.60   19.30
  -3 -11   1   45.78   11.55
  -2 -11   1   19.92   24.59
  -1 -11   1   29.00   25.47
   0 -11   1  178.85   15.78
   1 -11   1  -16.02   25.64
   2 -11   1   87.07   11.83
   3 -11   1   31.80   28.17
   4 -11   1   21.77   27.07
   5 -11   1   15.57   27.93
   6 -11   1    9.69   14.01
   7 -11   1    5.99   29.31
   8 -11   1  -39.32   30.29
   9 -11   1   43.54   31.27
 -13 -11   0  -35.31   34.46
 -12 -11   0  -28.37   33.41
 -11 -11   0   -6.36   32.26
 -10 -11   0   -1.06   30.60
  -9 -11   0   -7.51   29.99
  -8 -11   0   30.37   28.00
  -7 -11   0  114.51   12.52
  -6 -11   0    4.38   26.71
  -5 -11   0  -29.21   26.77
  -4 -11   0  182.17   15.77
  -3 -11   0  194.91   19.17
  -2 -11   0  124.39   11.50
  -1 -11   0   15.34   24.80
   0 -11   0  145.90   12.95
   1 -11   0   57.41   11.30
   2 -11   0   31.78   25.23
   3 -11   0  -32.91   27.00
   4 -11   0   18.25   25.71
   5 -11   0   -6.46   27.05
   6 -11   0  -45.03   30.14
   7 -11   0   75.68   13.93
   8 -11   0  -11.17   29.83
   9 -11   0   20.76   14.08
 -13 -11  -1    9.15   19.09
 -12 -11  -1   12.67   31.13
 -11 -11  -1   13.77   29.97
 -10 -11  -1    5.42   29.54
  -9 -11  -1    5.74   29.16
  -8 -11  -1    7.35   28.13
  -7 -11  -1   18.07   26.65
  -6 -11  -1   34.08   25.77
  -5 -11  -1   60.72   11.52
  -4 -11  -1   54.18   11.07
  -3 -11  -1   26.10   25.20
  -2 -11  -1  164.04   15.17
  -1 -11  -1   12.99   23.27
   0 -11  -1   -7.30   24.20
   1 -11  -1   52.94   11.34
   2 -11  -1   24.61   26.93
   3 -11  -1   -8.96   28.09
   4 -11  -1   38.84   28.89
   5 -11  -1  -11.83   28.17
   6 -11  -1  124.74   13.64
   7 -11  -1    5.91   30.99
   8 -11  -1   24.34   30.92
   9 -11  -1  -10.08   32.73
 -13 -11  -2   22.66   33.48
 -12 -11  -2  -38.86   32.30
 -11 -11  -2   11.78   29.64
 -10 -11  -2  -44.01   31.86
  -9 -11  -2    8.31   28.10
  -8 -11  -2  133.54   13.03
  -7 -11  -2    9.62   27.30
  -6 -11  -2   19.31   27.27
  -5 -11  -2   43.22   11.66
  -4 -11  -2   51.79   11.22
  -3 -11  -2   53.77   11.36
  -2 -11  -2    8.96   10.86
  -1 -11  -2  210.57   17.55
   0 -11  -2   19.77   24.08
   1 -11  -2   78.25   11.93
   2 -11  -2   72.86   12.20
   3 -11  -2   15.88   28.26
   4 -11  -2  137.45   13.01
   5 -11  -2   47.62   12.65
   6 -11  -2   16.67   19.91
   7 -11  -2  -89.69   31.91
   8 -11  -2  133.97   14.28
   9 -11  -2  -12.95   32.70
 -13 -11  -3    9.59   33.72
 -12 -11  -3   41.31   29.55
 -11 -11  -3   13.81   21.41
 -10 -11  -3   11.67   29.61
  -9 -11  -3   25.32   19.24
  -8 -11  -3   55.74   12.56
  -7 -11  -3   14.24   27.09
  -6 -11  -3   -8.01   28.47
  -5 -11  -3   27.52   25.67
  -4 -11  -3   81.73   11.39
  -3 -11  -3  118.14   11.61
  -2 -11  -3   -9.23   24.15
  -1 -11  -3    1.40   24.92
   0 -11  -3   28.46   25.41
   1 -11  -3  -41.63   26.54
   2 -11  -3  161.20   14.04
   3 -11  -3   39.25   11.96
   4 -11  -3   23.32   27.21
   5 -11  -3  -19.07   29.43
   6 -11  -3   21.95   28.82
   7 -11  -3   -1.61   29.17
   8 -11  -3   44.13   29.49
 -14 -11  -4    3.49   33.07
 -13 -11  -4   31.48   31.38
 -12 -11  -4   32.18   31.74
 -11 -11  -4   33.28   29.93
 -10 -11  -4  -33.87   29.19
  -9 -11  -4    4.96   30.44
  -8 -11  -4  115.94   13.22
  -7 -11  -4   34.49   26.45
  -6 -11  -4   32.31   27.10
  -5 -11  -4   30.65   24.79
  -4 -11  -4   21.57   25.43
  -3 -11  -4   34.63   24.96
  -2 -11  -4  -12.17   25.38
  -1 -11  -4   -7.77   25.34
   0 -11  -4  -14.98   25.35
   1 -11  -4   20.13   26.36
   2 -11  -4   29.09   27.13
   3 -11  -4   -9.06   27.39
   4 -11  -4   70.54   12.89
   5 -11  -4  -16.01   29.45
   6 -11  -4   36.47   29.63
   7 -11  -4   40.27   13.77
   8 -11  -4  -27.50   32.67
 -14 -11  -5    2.41   33.19
 -13 -11  -5   47.22   31.98
 -12 -11  -5  -55.80   34.16
 -11 -11  -5    0.57   30.73
 -10 -11  -5   -3.81   30.95
  -9 -11  -5  199.94   18.06
  -8 -11  -5   -0.55   28.68
  -7 -11  -5   -1.35   27.32
  -6 -11  -5  197.84   17.14
  -5 -11  -5  369.93   30.67
  -4 -11  -5    8.65   25.04
  -3 -11  -5   -2.28   25.35
  -2 -11  -5  136.89   13.48
  -1 -11  -5   12.38   17.41
   0 -11  -5  152.97   13.74
   1 -11  -5   37.15   24.88
   2 -11  -5  170.83   17.07
   3 -11  -5  -16.07   27.61
   4 -11  -5  -30.08   29.53
   5 -11  -5  120.18   14.27
   6 -11  -5   28.04   29.42
   7 -11  -5  -14.95   32.61
 -14 -11  -6   23.03   24.36
 -13 -11  -6   14.22   31.36
 -12 -11  -6   79.80   14.03
 -11 -11  -6   31.40   31.88
 -10 -11  -6  -23.79   31.56
  -9 -11  -6  -32.25   31.09
  -8 -11  -6   -5.11   28.48
  -7 -11  -6   74.04   12.55
  -6 -11  -6   -5.85   27.03
  -5 -11  -6  120.56   12.54
  -4 -11  -6   36.28   27.52
  -3 -11  -6   10.55   24.34
  -2 -11  -6   21.28   25.40
  -1 -11  -6  -17.40   26.66
   0 -11  -6    2.48   25.47
   1 -11  -6   33.28   28.03
   2 -11  -6    1.14   26.16
   3 -11  -6    4.62   27.88
   4 -11  -6   22.82   13.42
   5 -11  -6   30.60   29.27
   6 -11  -6   26.51   29.89
   7 -11  -6  -18.79   31.96
 -14 -11  -7  -41.90   37.03
 -13 -11  -7   28.61   31.53
 -12 -11  -7   19.22   31.30
 -11 -11  -7  -26.66   31.19
 -10 -11  -7   37.62   13.30
  -9 -11  -7   17.92   29.68
  -8 -11  -7   31.99   13.11
  -7 -11  -7  134.31   13.38
  -6 -11  -7  -62.28   28.32
  -5 -11  -7  107.35   12.48
  -4 -11  -7   47.74   12.04
  -3 -11  -7    3.94   25.65
  -2 -11  -7  129.90   12.53
  -1 -11  -7   76.52   12.05
   0 -11  -7  223.32   19.98
   1 -11  -7   74.96   13.03
   2 -11  -7   74.59   12.28
   3 -11  -7    0.27   27.88
   4 -11  -7   29.37   29.30
   5 -11  -7  -20.96   31.56
   6 -11  -7   96.20   14.06
 -14 -11  -8   34.08   32.60
 -13 -11  -8   29.04   24.67
 -12 -11  -8    1.28   32.34
 -11 -11  -8  -14.96   32.93
 -10 -11  -8   44.46   31.17
  -9 -11  -8    1.83   30.94
  -8 -11  -8   10.32   29.79
  -7 -11  -8   20.66   16.36
  -6 -11  -8    5.75   29.10
  -5 -11  -8    2.03   28.04
  -4 -11  -8  -39.46   29.48
  -3 -11  -8  113.30   12.92
  -2 -11  -8   10.08   16.33
  -1 -11  -8   44.21   12.06
   0 -11  -8   10.10   26.66
   1 -11  -8   -9.57   28.52
   2 -11  -8   20.73   19.68
   3 -11  -8  -19.93   29.12
   4 -11  -8   61.79   14.38
   5 -11  -8   21.13   29.89
 -13 -11  -9  -34.46   35.14
 -12 -11  -9  -21.04   33.79
 -11 -11  -9   22.57   31.88
 -10 -11  -9   26.49   13.29
  -9 -11  -9  -52.98   32.76
  -8 -11  -9    5.38   29.31
  -7 -11  -9    9.08   28.35
  -6 -11  -9   77.07   13.44
  -5 -11  -9   15.60   19.65
  -4 -11  -9   34.19   27.05
  -3 -11  -9  -12.96   28.74
  -2 -11  -9   24.09   26.01
  -1 -11  -9  -32.56   30.58
   0 -11  -9   52.49   12.54
   1 -11  -9   31.48   26.07
   2 -11  -9   32.52   28.27
   3 -11  -9   83.79   14.28
   4 -11  -9   21.03   30.54
   5 -11  -9   -1.42   23.02
 -13 -11 -10  -21.03   32.52
 -12 -11 -10  -15.93   34.47
 -11 -11 -10   76.01   14.57
 -10 -11 -10   17.36   21.52
  -9 -11 -10   14.41   29.58
  -8 -11 -10   -0.79   31.61
  -7 -11 -10  233.48   22.49
  -6 -11 -10  166.34   15.42
  -5 -11 -10  107.05   13.23
  -4 -11 -10  -12.97   29.60
  -3 -11 -10   45.01   12.94
  -2 -11 -10  183.60   18.10
  -1 -11 -10   25.75   27.44
   0 -11 -10  -23.19   29.77
   1 -11 -10   24.70   28.34
   2 -11 -10   32.97   29.97
   3 -11 -10   18.68   30.77
   4 -11 -10   -6.42   31.87
 -13 -11 -11   -6.06   34.32
 -12 -11 -11   18.91   31.95
 -11 -11 -11  -54.52   33.53
 -10 -11 -11   28.72   30.63
  -9 -11 -11  -37.08   31.30
  -8 -11 -11  -24.05   32.88
  -7 -11 -11   -9.48   30.11
  -6 -11 -11   26.99   27.78
  -5 -11 -11   38.33   29.68
  -4 -11 -11   69.71   13.41
  -3 -11 -11   -8.00   31.59
  -2 -11 -11   27.85   27.16
  -1 -11 -11   28.03   20.43
   0 -11 -11   50.02   12.74
   1 -11 -11   25.06   16.78
   2 -11 -11   60.28   14.58
   3 -11 -11    6.34   30.87
 -12 -11 -12  -11.59   34.26
 -11 -11 -12   46.87   31.63
 -10 -11 -12   -7.38   33.82
  -9 -11 -12  -19.80   31.53
  -8 -11 -12  -14.54   30.58
  -7 -11 -12   22.67   28.49
  -6 -11 -12   29.75   31.87
  -5 -11 -12   17.61   29.28
  -4 -11 -12    5.92   29.27
  -3 -11 -12   -0.38   31.72
  -2 -11 -12  100.12   14.29
  -1 -11 -12  -62.09   32.97
   0 -11 -12   -0.36   31.39
   1 -11 -12   11.96   30.38
   2 -11 -12    7.76   30.06
 -12 -11 -13   45.80   34.11
 -11 -11 -13  -38.75   35.38
 -10 -11 -13  -20.15   32.93
  -9 -11 -13   31.17   30.04
  -8 -11 -13   16.21   31.04
  -7 -11 -13    7.86   30.84
  -6 -11 -13   -3.48   30.31
  -5 -11 -13  -16.02   31.38
  -4 -11 -13   -3.38   31.00
  -3 -11 -13    4.92   30.56
  -2 -11 -13   -5.98   31.53
  -1 -11 -13   14.58   32.42
   0 -11 -13  -33.80   32.87
   1 -11 -13  -35.90   34.64
 -11 -11 -14   28.29   23.07
 -10 -11 -14   24.24   32.31
  -9 -11 -14  -19.71   32.97
  -8 -11 -14  -31.18   31.90
  -7 -11 -14    7.79   31.23
  -6 -11 -14   19.50   29.69
  -5 -11 -14  -15.14   30.48
  -4 -11 -14  -10.15   31.50
  -3 -11 -14   21.40   30.10
  -2 -11 -14   20.56   32.99
  -1 -11 -14   -3.83   32.80
  -9 -11 -15  -24.68   34.70
  -8 -11 -15    3.14   32.64
  -7 -11 -15  -12.06   33.35
  -6 -11 -15  -62.76   34.15
  -5 -11 -15   -9.62   31.78
  -4 -11 -15   21.61   33.82
  -3 -11 -15    9.73   32.31
   1 -12  13   77.55   15.10
   2 -12  13   32.40   30.38
   3 -12  13   10.67   32.36
  -2 -12  12  -46.76   34.13
  -1 -12  12   52.41   14.42
   0 -12  12    2.33   31.70
   1 -12  12   31.96   31.03
   2 -12  12    8.00   30.80
   3 -12  12   26.51   30.88
   4 -12  12   -0.48   31.70
   5 -12  12  -15.01   31.88
  -4 -12  11   26.48   30.94
  -3 -12  11    7.77   33.03
  -2 -12  11   10.05   30.84
  -1 -12  11   22.40   17.65
   0 -12  11  -11.20   32.05
   1 -12  11   24.42   30.74
   2 -12  11    2.39   29.80
   3 -12  11   -7.95   31.74
   4 -12  11   30.11   28.79
   5 -12  11  -27.12   32.36
   6 -12  11  -37.65   32.16
  -5 -12  10   -9.64   31.85
  -4 -12  10   24.12   31.85
  -3 -12  10   -1.88   29.98
  -2 -12  10   20.79   29.98
  -1 -12  10   17.73   30.69
   0 -12  10   12.43   21.06
   1 -12  10  -17.74   32.89
   2 -12  10   12.98   29.44
   3 -12  10    7.01   30.55
   4 -12  10  -26.45   30.90
   5 -12  10   12.66   30.72
   6 -12  10   -6.10   34.43
   7 -12  10   50.04   14.35
  -6 -12   9   35.75   31.66
  -5 -12   9   26.78   30.58
  -4 -12   9   -0.59   30.91
  -3 -12   9   26.98   29.45
  -2 -12   9  111.03   14.00
  -1 -12   9   87.18   14.12
   0 -12   9   21.67   29.11
   1 -12   9  114.01   13.75
   2 -12   9   15.13   30.99
   3 -12   9   -5.94   31.55
   4 -12   9   25.80   29.66
   5 -12   9   12.60   33.86
   6 -12   9   -2.84   30.65
   7 -12   9   15.74   31.50
   8 -12   9   44.34   30.42
  -7 -12   8   -5.15   31.41
  -6 -12   8   -7.71   33.70
  -5 -12   8   22.54   32.08
  -4 -12   8   70.38   13.47
  -3 -12   8    2.76   20.54
  -2 -12   8   21.96   29.33
  -1 -12   8   27.08   30.12
   0 -12   8  -42.06   30.20
   1 -12   8   21.17   28.11
   2 -12   8    5.12   28.96
   3 -12   8   45.38   30.75
   4 -12   8  -15.48   31.20
   5 -12   8   42.01   28.57
   6 -12   8   -5.84   30.80
   7 -12   8   14.92   30.74
   8 -12   8   37.18   30.31
  -8 -12   7   19.35   30.93
  -7 -12   7   19.90   31.30
  -6 -12   7   45.82   13.23
  -5 -12   7   18.24   20.92
  -4 -12   7  -19.53   28.20
  -3 -12   7   80.23   13.22
  -2 -12   7   71.47   12.91
  -1 -12   7   -5.64   27.90
   0 -12   7   -8.81   28.96
   1 -12   7  -21.60   29.74
   2 -12   7   20.17   20.50
   3 -12   7   44.68   30.81
   4 -12   7   29.08   20.97
   5 -12   7   36.81   30.19
   6 -12   7   -1.70   30.67
   7 -12   7   -7.98   21.59
   8 -12   7   -3.36   30.65
  -9 -12   6   33.93   31.11
  -8 -12   6  -40.07   31.21
  -7 -12   6   70.20   13.58
  -6 -12   6  -34.46   30.65
  -5 -12   6  -55.20   32.22
  -4 -12   6   21.38   28.91
  -3 -12   6   33.47   28.46
  -2 -12   6   32.44   12.85
  -1 -12   6   69.58   13.07
   0 -12   6   62.38   13.01
   1 -12   6   12.36   12.33
   2 -12   6   51.85   13.04
   3 -12   6   11.73   29.64
   4 -12   6   -6.53   29.76
   5 -12   6   28.90   13.28
   6 -12   6   -7.78   29.33
   7 -12   6   15.72   29.17
   8 -12   6   38.25   29.04
   9 -12   6   20.46   31.43
 -10 -12   5   20.30   32.24
  -9 -12   5  -15.59   31.84
  -8 -12   5    3.10   30.03
  -7 -12   5   21.24   16.94
  -6 -12   5   10.74   28.69
  -5 -12   5   11.48   21.76
  -4 -12   5   46.45   13.42
  -3 -12   5   33.25   26.69
  -2 -12   5  -29.90   28.82
  -1 -12   5  -14.37   28.40
   0 -12   5   35.15   12.06
   1 -12   5   26.05   28.23
   2 -12   5   -0.06   27.70
   3 -12   5   10.91   27.89
   4 -12   5   34.05   12.97
   5 -12   5   27.35   29.86
   6 -12   5   20.38   16.93
   7 -12   5    4.15   29.70
   8 -12   5   -6.44   31.59
   9 -12   5   12.27   32.86
 -10 -12   4  -23.16   32.41
  -9 -12   4   34.91   28.42
  -8 -12   4   48.76   14.00
  -7 -12   4  -14.61   29.73
  -6 -12   4    0.60   27.67
  -5 -12   4   27.69   27.26
  -4 -12   4  -23.74   30.78
  -3 -12   4   39.96   29.19
  -2 -12   4  -13.68   28.41
  -1 -12   4  155.43   14.11
   0 -12   4   -9.76   27.48
   1 -12   4   45.74   12.05
   2 -12   4   43.29   12.65
   3 -12   4  121.15   13.30
   4 -12   4   28.71   26.83
   5 -12   4   18.87   27.22
   6 -12   4   16.85   28.44
   7 -12   4   12.24   13.19
   8 -12   4    0.02   32.29
   9 -12   4  -13.67   33.00
 -11 -12   3   14.28   32.07
 -10 -12   3   37.60   31.85
  -9 -12   3   -3.74   30.74
  -8 -12   3   18.74   27.99
  -7 -12   3  -54.67   31.94
  -6 -12   3   51.80   12.91
  -5 -12   3   82.91   13.33
  -4 -12   3   18.34   26.60
  -3 -12   3  -49.26   28.28
  -2 -12   3   18.38   12.10
  -1 -12   3  -23.03   28.28
   0 -12   3  -34.74   26.14
   1 -12   3   72.69   12.54
   2 -12   3    5.26   26.81
   3 -12   3  -26.26   27.86
   4 -12   3  -24.27   28.46
   5 -12   3   18.01   27.04
   6 -12   3   29.61   27.75
   7 -12   3   11.72   17.34
   8 -12   3   22.27   21.96
   9 -12   3   35.92   30.15
 -11 -12   2   24.46   31.07
 -10 -12   2   -4.37   30.79
  -9 -12   2   21.70   31.98
  -8 -12   2   15.37   30.67
  -7 -12   2  111.65   13.18
  -6 -12   2   65.64   12.83
  -5 -12   2  142.97   12.96
  -4 -12   2   25.64   26.75
  -3 -12   2   21.57   15.57
  -2 -12   2  -17.47   26.77
  -1 -12   2   25.37   26.11
   0 -12   2   17.87   26.34
   1 -12   2   19.12   26.61
   2 -12   2   49.95   12.52
   3 -12   2    4.75   27.96
   4 -12   2   20.05   28.31
   5 -12   2  -35.28   30.24
   6 -12   2   -5.72   29.56
   7 -12   2   22.98   13.70
   8 -12   2    4.63   32.66
   9 -12   2  -44.54   33.98
 -12 -12   1   -7.77   33.67
 -11 -12   1  -30.30   33.09
 -10 -12   1  -18.61   31.55
  -9 -12   1  142.44   14.22
  -8 -12   1   22.75   21.57
  -7 -12   1   34.19   27.68
  -6 -12   1   62.09   12.16
  -5 -12   1  -31.34   28.55
  -4 -12   1   15.75   26.29
  -3 -12   1   20.97   26.37
  -2 -12   1   63.11   12.73
  -1 -12   1   97.69   12.42
   0 -12   1   61.71   12.17
   1 -12   1   -0.81   28.20
   2 -12   1   76.01   12.86
   3 -12   1   75.04   13.18
   4 -12   1   -0.55   29.10
   5 -12   1    0.96   29.00
   6 -12   1   18.82   29.49
   7 -12   1   37.64   29.14
   8 -12   1  -13.89   32.03
 -12 -12   0   44.19   32.41
 -11 -12   0   20.09   29.97
 -10 -12   0  -29.00   30.46
  -9 -12   0    5.57   29.69
  -8 -12   0   35.31   27.60
  -7 -12   0   27.42   28.19
  -6 -12   0   14.38   26.58
  -5 -12   0   46.17   12.19
  -4 -12   0   50.05   12.15
  -3 -12   0  126.67   12.36
  -2 -12   0  -15.83   25.29
  -1 -12   0  183.46   16.29
   0 -12   0    6.03   28.36
   1 -12   0  170.06   16.83
   2 -12   0  103.30   12.81
   3 -12   0  -41.90   29.48
   4 -12   0   50.23   12.64
   5 -12   0   24.81   28.54
   6 -12   0   27.41   27.93
   7 -12   0   21.19   30.44
   8 -12   0  -11.51   33.20
 -12 -12  -1  -70.30   33.76
 -11 -12  -1   17.90   30.44
 -10 -12  -1   34.64   30.03
  -9 -12  -1  109.45   13.44
  -8 -12  -1   -0.34   30.50
  -7 -12  -1  117.61   13.09
  -6 -12  -1   22.70   16.41
  -5 -12  -1   85.08   12.69
  -4 -12  -1   24.22   25.35
  -3 -12  -1   88.24   11.93
  -2 -12  -1   37.43   11.42
  -1 -12  -1   95.05   12.14
   0 -12  -1   97.70   12.80
   1 -12  -1   72.63   12.42
   2 -12  -1   29.17   28.56
   3 -12  -1  -17.17   29.06
   4 -12  -1   33.97   27.35
   5 -12  -1   37.09   29.64
   6 -12  -1   59.52   14.15
   7 -12  -1  -32.70   33.23
   8 -12  -1   -0.24   29.92
 -13 -12  -2   10.80   33.00
 -12 -12  -2   36.79   30.42
 -11 -12  -2  -23.14   30.85
 -10 -12  -2   19.85   27.33
  -9 -12  -2   11.71   29.72
  -8 -12  -2   53.03   13.18
  -7 -12  -2   75.97   13.05
  -6 -12  -2  -16.62   27.17
  -5 -12  -2  -43.45   28.92
  -4 -12  -2   84.66   12.38
  -3 -12  -2    7.77   26.77
  -2 -12  -2   42.30   11.70
  -1 -12  -2   14.11   27.49
   0 -12  -2    1.55   26.69
   1 -12  -2   35.29   26.55
   2 -12  -2   13.72   26.20
   3 -12  -2    5.51   19.36
   4 -12  -2  -58.47   30.04
   5 -12  -2  -20.15   28.96
   6 -12  -2   22.88   17.10
   7 -12  -2   11.04   31.35
   8 -12  -2   24.50   31.78
 -13 -12  -3   17.11   33.99
 -12 -12  -3   29.58   29.97
 -11 -12  -3  -28.49   32.91
 -10 -12  -3   22.95   29.58
  -9 -12  -3   59.04   13.27
  -8 -12  -3  138.89   13.61
  -7 -12  -3   64.12   12.47
  -6 -12  -3  -11.31   28.51
  -5 -12  -3   43.16   28.88
  -4 -12  -3   12.79   26.49
  -3 -12  -3   15.92   27.12
  -2 -12  -3  156.47   14.58
  -1 -12  -3   -0.83   26.16
   0 -12  -3   24.14   25.05
   1 -12  -3   68.07   12.59
   2 -12  -3    2.49   26.83
   3 -12  -3  -29.44   29.13
   4 -12  -3  -22.72   30.47
   5 -12  -3   23.04   30.54
   6 -12  -3   27.69   28.34
   7 -12  -3    0.32   31.83
 -13 -12  -4  -36.93   35.32
 -12 -12  -4   15.36   31.48
 -11 -12  -4   18.79   31.11
 -10 -12  -4   34.58   29.31
  -9 -12  -4   21.63   13.17
  -8 -12  -4  -23.79   30.39
  -7 -12  -4  103.58   13.15
  -6 -12  -4  -13.05   28.47
  -5 -12  -4   16.66   26.78
  -4 -12  -4  186.78   16.75
  -3 -12  -4   82.88   11.86
  -2 -12  -4   91.91   12.34
  -1 -12  -4    2.42   27.19
   0 -12  -4   17.09   18.63
   1 -12  -4   21.86   18.24
   2 -12  -4   16.55   28.35
   3 -12  -4   13.03   28.21
   4 -12  -4   25.38   31.44
   5 -12  -4   20.96   29.91
   6 -12  -4   29.41   13.25
   7 -12  -4   27.78   29.88
 -13 -12  -5  -17.10   33.12
 -12 -12  -5   23.00   32.18
 -11 -12  -5   29.62   30.01
 -10 -12  -5    8.81   30.71
  -9 -12  -5   38.77   29.19
  -8 -12  -5   52.78   13.00
  -7 -12  -5  -31.23   29.80
  -6 -12  -5  -11.52   28.03
  -5 -12  -5   20.37   12.86
  -4 -12  -5   10.01   26.37
  -3 -12  -5   -1.00   24.74
  -2 -12  -5  -17.51   27.25
  -1 -12  -5  165.47   14.26
   0 -12  -5  -35.64   27.56
   1 -12  -5   25.37   19.22
   2 -12  -5   35.18   26.66
   3 -12  -5   11.49   29.12
   4 -12  -5  -45.71   29.47
   5 -12  -5    3.05   31.11
   6 -12  -5   14.01   30.85
 -13 -12  -6   35.54   31.85
 -12 -12  -6    1.46   32.45
 -11 -12  -6    8.53   31.40
 -10 -12  -6  -76.77   32.56
  -9 -12  -6   35.48   31.83
  -8 -12  -6   66.86   13.27
  -7 -12  -6   59.15   13.18
  -6 -12  -6  159.31   15.86
  -5 -12  -6  -20.59   28.81
  -4 -12  -6   28.86   12.38
  -3 -12  -6  -11.86   28.29
  -2 -12  -6   23.94   27.81
  -1 -12  -6   85.58   12.76
   0 -12  -6  -11.24   28.64
   1 -12  -6  -51.02   30.27
   2 -12  -6  -17.80   28.69
   3 -12  -6   27.86   28.94
   4 -12  -6  118.16   14.65
   5 -12  -6   23.44   21.75
   6 -12  -6    9.42   21.68
 -13 -12  -7    6.73   33.06
 -12 -12  -7   41.51   31.92
 -11 -12  -7    8.19   30.27
 -10 -12  -7   31.38   14.19
  -9 -12  -7   38.80   28.94
  -8 -12  -7   93.27   13.96
  -7 -12  -7   17.41   29.13
  -6 -12  -7   26.92   13.04
  -5 -12  -7   87.46   13.09
  -4 -12  -7   10.96   28.95
  -3 -12  -7   74.45   12.97
  -2 -12  -7   24.48   12.35
  -1 -12  -7   12.11   27.39
   0 -12  -7   31.75   25.11
   1 -12  -7   29.75   26.79
   2 -12  -7   14.37   20.12
   3 -12  -7   36.19   29.01
   4 -12  -7   23.50   30.68
   5 -12  -7   16.88   30.28
 -13 -12  -8   -7.18   33.14
 -12 -12  -8   -2.68   31.60
 -11 -12  -8   -3.91   31.95
 -10 -12  -8   27.17   20.94
  -9 -12  -8  133.04   14.00
  -8 -12  -8  158.06   14.26
  -7 -12  -8  115.47   14.23
  -6 -12  -8  -55.28   30.23
  -5 -12  -8   71.45   13.03
  -4 -12  -8   72.23   13.50
  -3 -12  -8   87.02   13.57
  -2 -12  -8    0.12   27.43
  -1 -12  -8   27.73   27.13
   0 -12  -8  -50.08   28.86
   1 -12  -8   34.68   27.11
   2 -12  -8  -21.16   27.49
   3 -12  -8   -7.99   30.57
   4 -12  -8   10.16   29.69
 -13 -12  -9    6.69   34.49
 -12 -12  -9    6.82   32.78
 -11 -12  -9  -22.93   32.90
 -10 -12  -9   14.00   22.59
  -9 -12  -9   18.75   30.50
  -8 -12  -9   17.46   12.93
  -7 -12  -9  -11.58   30.06
  -6 -12  -9  200.92   17.79
  -5 -12  -9   42.64   13.28
  -4 -12  -9  252.85   21.07
  -3 -12  -9  -24.75   29.93
  -2 -12  -9  -22.03   30.14
  -1 -12  -9    2.96   28.41
   0 -12  -9   38.56   12.89
   1 -12  -9   10.26   27.86
   2 -12  -9  -10.02   28.19
   3 -12  -9   31.04   33.11
   4 -12  -9   26.14   31.12
 -12 -12 -10    5.85   33.26
 -11 -12 -10    5.97   32.12
 -10 -12 -10  -11.64   31.41
  -9 -12 -10   11.42   30.76
  -8 -12 -10    1.37   29.97
  -7 -12 -10   38.75   29.29
  -6 -12 -10    2.54   29.20
  -5 -12 -10   28.66   30.33
  -4 -12 -10  -44.34   32.73
  -3 -12 -10   13.44   21.15
  -2 -12 -10   41.29   14.04
  -1 -12 -10  -17.95   30.15
   0 -12 -10   12.30   29.19
   1 -12 -10   39.96   29.32
   2 -12 -10   30.49   30.43
   3 -12 -10  -17.29   33.09
 -12 -12 -11   34.10   33.12
 -11 -12 -11   57.96   15.18
 -10 -12 -11   17.57   31.13
  -9 -12 -11    6.15   30.98
  -8 -12 -11   43.33   29.97
  -7 -12 -11  -22.58   31.65
  -6 -12 -11  -22.98   30.93
  -5 -12 -11   35.77   29.36
  -4 -12 -11   36.94   29.34
  -3 -12 -11   16.58   28.61
  -2 -12 -11    3.21   29.86
  -1 -12 -11   62.70   13.20
   0 -12 -11   27.75   31.09
   1 -12 -11   38.97   29.58
   2 -12 -11   31.30   22.73
 -11 -12 -12  -15.35   33.35
 -10 -12 -12  -54.91   33.60
  -9 -12 -12   27.37   30.74
  -8 -12 -12   -7.95   33.28
  -7 -12 -12    8.39   21.23
  -6 -12 -12  -13.06   30.18
  -5 -12 -12  -10.47   29.68
  -4 -12 -12  -43.90   32.25
  -3 -12 -12   40.33   13.58
  -2 -12 -12   73.21   14.09
  -1 -12 -12   25.11   31.99
   0 -12 -12   22.77   30.80
 -10 -12 -13   17.31   16.17
  -9 -12 -13    1.89   33.98
  -8 -12 -13   -5.87   32.10
  -7 -12 -13   33.49   31.23
  -6 -12 -13  -25.62   31.10
  -5 -12 -13    3.85   30.50
  -4 -12 -13   25.41   28.84
  -3 -12 -13  -45.35   31.17
  -2 -12 -13   -9.77   32.42
  -1 -12 -13   28.61   33.61
  -9 -12 -14   26.38   34.21
  -8 -12 -14   31.42   31.32
  -7 -12 -14   38.03   32.07
  -6 -12 -14   24.63   32.69
  -5 -12 -14   18.16   32.14
  -4 -12 -14   11.71   29.78
  -3 -12 -14    5.89   31.76
  -2 -13  11  -13.53   34.14
  -1 -13  11  -18.15   31.43
   0 -13  11   37.56   30.21
   1 -13  11   36.87   30.47
   2 -13  11   -8.09   30.05
   3 -13  11    7.44   31.89
   4 -13  11    0.44   32.64
  -4 -13  10   34.35   34.30
  -3 -13  10  -10.01   31.46
  -2 -13  10   28.30   30.90
  -1 -13  10   50.60   14.58
   0 -13  10  -70.62   33.09
   1 -13  10   22.23   15.28
   2 -13  10   -8.55   28.59
   3 -13  10  -30.71   32.89
   4 -13  10   29.82   21.06
   5 -13  10    9.16   29.42
  -5 -13   9    4.43   32.26
  -4 -13   9  -51.66   33.56
  -3 -13   9    0.85   31.37
  -2 -13   9  -26.44   31.79
  -1 -13   9   33.98   31.04
   0 -13   9   22.62   29.00
   1 -13   9   40.20   31.05
   2 -13   9   39.20   29.75
   3 -13   9   17.21   30.00
   4 -13   9  -34.22   31.48
   5 -13   9   -7.77   21.78
   6 -13   9  -54.88   33.87
  -6 -13   8  -11.63   31.41
  -5 -13   8   18.54   31.37
  -4 -13   8   14.18   29.22
  -3 -13   8   33.30   30.43
  -2 -13   8  -27.82   30.45
  -1 -13   8  -11.38   30.35
   0 -13   8   42.94   13.88
   1 -13   8   17.70   29.55
   2 -13   8   48.44   13.18
   3 -13   8  -25.66   31.35
   4 -13   8   25.52   32.60
   5 -13   8  -47.76   32.49
   6 -13   8  -36.53   32.69
   7 -13   8    8.89   32.87
  -7 -13   7   58.15   14.70
  -6 -13   7    9.31   30.15
  -5 -13   7  102.64   13.98
  -4 -13   7    7.46   30.56
  -3 -13   7  -23.59   30.07
  -2 -13   7   44.45   13.45
  -1 -13   7   -5.95   27.95
   0 -13   7   16.84   28.61
   1 -13   7   27.92   28.28
   2 -13   7  -12.41   30.99
   3 -13   7   30.06   28.20
   4 -13   7    6.18   27.96
   5 -13   7   45.19   30.94
   6 -13   7    8.64   31.67
   7 -13   7   12.77   30.84
  -8 -13   6   16.22   31.64
  -7 -13   6   16.40   32.75
  -6 -13   6  -33.80   31.35
  -5 -13   6  -47.99   31.56
  -4 -13   6  -16.37   28.24
  -3 -13   6   10.97   28.10
  -2 -13   6  -41.65   31.01
  -1 -13   6   50.08   13.99
   0 -13   6   -6.02   29.28
   1 -13   6    8.01   28.58
   2 -13   6    7.18   28.54
   3 -13   6  -42.25   30.42
   4 -13   6    3.53   29.39
   5 -13   6   -6.44   30.63
   6 -13   6  -41.45   30.93
   7 -13   6  -40.03   33.04
  -9 -13   5    6.86   32.67
  -8 -13   5  -16.57   31.91
  -7 -13   5   -1.59   30.78
  -6 -13   5  -17.33   32.10
  -5 -13   5   18.91   28.26
  -4 -13   5   18.94   27.26
  -3 -13   5   51.04   12.65
  -2 -13   5  -28.29   29.53
  -1 -13   5   66.34   12.99
   0 -13   5   -6.65   29.99
   1 -13   5   75.47   13.15
   2 -13   5   15.11   28.15
   3 -13   5  -15.61   29.92
   4 -13   5    7.90   30.54
   5 -13   5   49.24   13.78
   6 -13   5   13.93   17.56
   7 -13   5  -37.62   31.55
  -9 -13   4   29.13   30.37
  -8 -13   4   31.64   32.63
  -7 -13   4   10.01   29.92
  -6 -13   4   25.28   30.63
  -5 -13   4  -21.42   30.00
  -4 -13   4   24.54   28.46
  -3 -13   4  116.64   13.18
  -2 -13   4   22.06   20.42
  -1 -13   4  -17.36   28.24
   0 -13   4    9.10   28.16
   1 -13   4   17.53   27.82
   2 -13   4  -30.07   29.46
   3 -13   4    8.96   29.24
   4 -13   4    8.69   29.01
   5 -13   4    2.01   30.73
   6 -13   4    5.05   29.21
   7 -13   4  -48.56   30.86
 -10 -13   3  -14.48   31.55
  -9 -13   3   45.67   30.88
  -8 -13   3  -10.95   31.34
  -7 -13   3   -2.67   28.46
  -6 -13   3    7.17   28.72
  -5 -13   3   -9.18   29.21
  -4 -13   3   -2.04   28.02
  -3 -13   3  -16.09   29.42
  -2 -13   3  119.28   13.11
  -1 -13   3   55.69   13.01
   0 -13   3   31.95   26.04
   1 -13   3  -29.48   28.05
   2 -13   3  130.79   13.70
   3 -13   3   21.06   28.73
   4 -13   3   24.84   28.56
   5 -13   3   21.42   29.75
   6 -13   3  -15.54   31.35
   7 -13   3  -32.77   31.95
 -10 -13   2   -3.02   31.54
  -9 -13   2   -2.40   31.99
  -8 -13   2  -39.59   30.94
  -7 -13   2   33.65   29.87
  -6 -13   2   25.18   28.10
  -5 -13   2   26.05   27.55
  -4 -13   2  186.02   15.68
  -3 -13   2   92.80   13.04
  -2 -13   2   27.59   27.38
  -1 -13   2  -42.89   30.13
   0 -13   2  121.49   13.22
   1 -13   2  -15.56   28.30
   2 -13   2   -1.85   28.43
   3 -13   2   19.18   14.01
   4 -13   2   19.40   14.36
   5 -13   2  -11.70   29.40
   6 -13   2   33.55   12.99
   7 -13   2  -60.98   33.06
 -11 -13   1   25.71   32.05
 -10 -13   1  -71.15   33.38
  -9 -13   1   25.82   20.41
  -8 -13   1  -33.06   29.72
  -7 -13   1   -9.89   29.50
  -6 -13   1  -15.40   28.34
  -5 -13   1  -13.73   28.16
  -4 -13   1   -4.80   27.66
  -3 -13   1   21.68   19.59
  -2 -13   1   16.76   27.23
  -1 -13   1  -13.27   28.41
   0 -13   1  -22.00   27.25
   1 -13   1  127.71   13.29
   2 -13   1   14.71   16.23
   3 -13   1  137.46   13.63
   4 -13   1   -3.85   28.60
   5 -13   1   16.68   29.17
   6 -13   1   21.99   29.75
   7 -13   1   38.05   30.20
 -11 -13   0  -18.92   33.48
 -10 -13   0   38.01   31.88
  -9 -13   0  -24.17   30.05
  -8 -13   0  -12.46   30.71
  -7 -13   0   62.29   13.02
  -6 -13   0  -14.81   29.69
  -5 -13   0  -41.89   29.72
  -4 -13   0  -20.57   28.77
  -3 -13   0   27.77   18.84
  -2 -13   0   24.02   27.86
  -1 -13   0  192.97   17.61
   0 -13   0    9.61   28.28
   1 -13   0   64.01   13.48
   2 -13   0   74.59   13.01
   3 -13   0   31.75   30.55
   4 -13   0   20.24   29.28
   5 -13   0   80.65   13.60
   6 -13   0   27.70   30.20
   7 -13   0   -3.43   30.76
 -11 -13  -1  -14.35   31.83
 -10 -13  -1   15.57   29.50
  -9 -13  -1    5.65   28.01
  -8 -13  -1   20.82   30.21
  -7 -13  -1   36.84   28.08
  -6 -13  -1  -22.16   29.53
  -5 -13  -1   69.18   12.94
  -4 -13  -1   38.22   28.40
  -3 -13  -1   73.46   12.76
  -2 -13  -1    4.35   27.44
  -1 -13  -1  170.98   17.04
   0 -13  -1   27.62   27.74
   1 -13  -1   29.65   27.24
   2 -13  -1  -15.94   28.65
   3 -13  -1   31.80   28.19
   4 -13  -1    7.04   28.85
   5 -13  -1   32.22   30.60
   6 -13  -1   19.60   22.22
   7 -13  -1  -46.20   32.53
 -12 -13  -2   -9.62   33.57
 -11 -13  -2   37.94   29.65
 -10 -13  -2  -29.02   31.46
  -9 -13  -2  -33.36   29.94
  -8 -13  -2   20.73   27.11
  -7 -13  -2    8.45   20.45
  -6 -13  -2   74.31   13.37
  -5 -13  -2   53.25   12.90
  -4 -13  -2   25.50   27.09
  -3 -13  -2   27.21   27.48
  -2 -13  -2   25.07   28.06
  -1 -13  -2   70.78   12.82
   0 -13  -2   40.21   28.09
   1 -13  -2   35.70   12.19
   2 -13  -2   32.41   12.78
   3 -13  -2  -14.25   29.54
   4 -13  -2    0.54   28.78
   5 -13  -2   -2.71   29.61
   6 -13  -2  -33.90   33.03
 -12 -13  -3  -74.68   34.18
 -11 -13  -3   33.60   30.94
 -10 -13  -3  -25.34   31.73
  -9 -13  -3   31.37   13.31
  -8 -13  -3   65.12   14.10
  -7 -13  -3  -25.57   28.87
  -6 -13  -3   45.25   31.05
  -5 -13  -3  140.03   13.39
  -4 -13  -3   29.62   12.75
  -3 -13  -3  113.21   13.10
  -2 -13  -3   69.56   12.78
  -1 -13  -3   88.21   12.92
   0 -13  -3    2.38   27.17
   1 -13  -3  -49.07   28.93
   2 -13  -3   52.77   12.80
   3 -13  -3   16.28   28.28
   4 -13  -3  -10.38   29.48
   5 -13  -3   18.69   30.98
   6 -13  -3  -23.64   31.81
 -12 -13  -4   19.83   16.05
 -11 -13  -4   -9.24   32.57
 -10 -13  -4   26.18   30.62
  -9 -13  -4  -25.68   30.70
  -8 -13  -4  -58.67   31.67
  -7 -13  -4    4.79   28.93
  -6 -13  -4   -6.10   29.06
  -5 -13  -4    6.80   27.07
  -4 -13  -4   30.33   26.57
  -3 -13  -4   94.05   13.40
  -2 -13  -4   54.33   13.19
  -1 -13  -4   16.87   20.20
   0 -13  -4  -49.94   29.56
   1 -13  -4   92.83   13.52
   2 -13  -4   -4.94   28.01
   3 -13  -4  -15.66   29.15
   4 -13  -4  -31.27   30.77
   5 -13  -4   29.54   21.32
   6 -13  -4   27.74   29.82
 -12 -13  -5  -25.91   34.50
 -11 -13  -5   39.28   31.04
 -10 -13  -5   21.71   30.29
  -9 -13  -5  -45.57   31.56
  -8 -13  -5   29.86   20.20
  -7 -13  -5   32.35   28.48
  -6 -13  -5   27.50   28.57
  -5 -13  -5    4.19   20.91
  -4 -13  -5  164.59   16.42
  -3 -13  -5   39.14   26.24
  -2 -13  -5  142.03   13.17
  -1 -13  -5    4.55   31.08
   0 -13  -5  -18.16   28.36
   1 -13  -5    9.05   28.93
   2 -13  -5  -10.93   29.55
   3 -13  -5    6.94   31.65
   4 -13  -5  -18.56   31.08
   5 -13  -5   -8.83   31.29
 -12 -13  -6   35.58   30.48
 -11 -13  -6   -7.40   30.85
 -10 -13  -6   15.34   31.97
  -9 -13  -6  -21.09   31.35
  -8 -13  -6   -0.43   31.43
  -7 -13  -6   35.23   31.57
  -6 -13  -6  253.25   24.61
  -5 -13  -6   28.48   13.31
  -4 -13  -6   12.42   28.17
  -3 -13  -6   10.83   28.85
  -2 -13  -6   41.93   13.35
  -1 -13  -6   -1.43   30.18
   0 -13  -6   10.02   28.19
   1 -13  -6   30.92   28.88
   2 -13  -6   -4.79   29.44
   3 -13  -6    3.98   29.48
   4 -13  -6    3.18   33.10
 -12 -13  -7   23.30   22.71
 -11 -13  -7  -37.83   33.90
 -10 -13  -7   35.51   31.64
  -9 -13  -7   40.62   29.39
  -8 -13  -7  -11.25   31.68
  -7 -13  -7   30.36   20.99
  -6 -13  -7  190.83   18.74
  -5 -13  -7  -11.16   28.81
  -4 -13  -7  -13.74   28.18
  -3 -13  -7   14.81   20.60
  -2 -13  -7   18.41   27.22
  -1 -13  -7   23.81   19.26
   0 -13  -7   31.23   28.16
   1 -13  -7   30.41   27.38
   2 -13  -7   25.96   27.05
   3 -13  -7   42.17   13.69
   4 -13  -7   41.18   29.97
 -12 -13  -8  -15.60   33.12
 -11 -13  -8  -66.25   32.96
 -10 -13  -8   34.38   33.21
  -9 -13  -8    9.31   32.20
  -8 -13  -8   -3.28   30.73
  -7 -13  -8  -59.12   32.50
  -6 -13  -8  -19.34   30.37
  -5 -13  -8  -16.41   30.59
  -4 -13  -8  175.68   16.92
  -3 -13  -8   11.25   28.72
  -2 -13  -8  -25.08   29.59
  -1 -13  -8  -28.22   28.05
   0 -13  -8   11.18   27.54
   1 -13  -8  -14.32   30.48
   2 -13  -8   16.12   30.43
   3 -13  -8   28.52   29.69
 -11 -13  -9  -10.97   33.68
 -10 -13  -9   16.84   32.55
  -9 -13  -9   22.32   29.56
  -8 -13  -9   25.03   22.39
  -7 -13  -9  -17.56   31.32
  -6 -13  -9    5.36   30.14
  -5 -13  -9   70.10   13.97
  -4 -13  -9   18.40   30.45
  -3 -13  -9    2.82   29.76
  -2 -13  -9   37.90   28.07
  -1 -13  -9   63.87   13.09
   0 -13  -9   19.07   28.56
   1 -13  -9  -10.41   30.50
   2 -13  -9   34.60   29.90
 -11 -13 -10   35.28   32.48
 -10 -13 -10  -42.75   33.70
  -9 -13 -10   22.69   31.93
  -8 -13 -10   -0.83   31.29
  -7 -13 -10    2.94   32.19
  -6 -13 -10  -28.18   32.21
  -5 -13 -10    1.57   30.94
  -4 -13 -10   -2.77   31.14
  -3 -13 -10   37.35   29.47
  -2 -13 -10    3.41   28.24
  -1 -13 -10   21.02   29.93
   0 -13 -10   17.69   30.39
   1 -13 -10   15.62   29.52
 -10 -13 -11  -25.72   34.43
  -9 -13 -11   -2.72   32.01
  -8 -13 -11   31.52   31.81
  -7 -13 -11  -41.23   33.61
  -6 -13 -11  -12.54   32.37
  -5 -13 -11  -28.94   30.46
  -4 -13 -11    0.45   30.18
  -3 -13 -11  -23.37   32.46
  -2 -13 -11    4.62   30.71
  -1 -13 -11  -15.17   30.27
   0 -13 -11  -29.40   32.13
  -9 -13 -12   31.97   15.58
  -8 -13 -12   25.01   30.74
  -7 -13 -12   32.76   21.88
  -6 -13 -12  -45.34   31.79
  -5 -13 -12   29.76   32.66
  -4 -13 -12   21.37   29.29
  -3 -13 -12   -2.49   30.55
  -2 -13 -12    1.64   32.15
  -7 -13 -13   76.74   14.99
  -6 -13 -13   -7.54   32.71
  -5 -13 -13  -29.98   33.75
  -4 -13 -13   20.79   31.31
   0 -14  10   33.05   31.55
   1 -14  10   43.37   33.58
  -3 -14   9   37.91   31.77
  -2 -14   9    3.78   33.66
  -1 -14   9  -15.21   32.29
   0 -14   9   47.86   14.43
   1 -14   9   10.03   31.39
   2 -14   9   -0.75   32.00
   3 -14   9    7.25   30.82
   4 -14   9  -23.52   32.57
  -4 -14   8  -53.26   33.44
  -3 -14   8   62.33   14.26
  -2 -14   8  -35.48   29.96
  -1 -14   8   21.33   22.05
   0 -14   8   20.94   30.35
   1 -14   8   26.37   28.49
   2 -14   8  -30.46   33.26
   3 -14   8    4.46   29.62
   4 -14   8  -22.31   30.91
   5 -14   8   19.15   30.58
  -6 -14   7  -21.33   32.00
  -5 -14   7   42.46   31.14
  -4 -14   7  -22.39   31.33
  -3 -14   7    4.44   30.46
  -2 -14   7  -39.88   31.97
  -1 -14   7    6.29   30.53
   0 -14   7   10.36   30.02
   1 -14   7   14.22   34.44
   2 -14   7  -32.87   31.41
   3 -14   7   30.31   13.90
   4 -14   7   29.40   30.68
   5 -14   7  -32.49   31.53
  -6 -14   6  -23.73   31.74
  -5 -14   6   13.53   17.17
  -4 -14   6   49.73   14.13
  -3 -14   6   -9.05   21.06
  -2 -14   6  -14.10   32.02
  -1 -14   6   58.74   14.23
   0 -14   6   12.20   28.72
   1 -14   6  -19.05   31.94
   2 -14   6  -34.59   30.61
   3 -14   6  -15.28   30.68
   4 -14   6   17.35   21.41
   5 -14   6   19.71   30.28
   6 -14   6   34.38   31.98
  -7 -14   5   17.55   30.94
  -6 -14   5   19.30   31.72
  -5 -14   5  -64.87   31.81
  -4 -14   5  -25.84   32.56
  -3 -14   5    4.37   29.57
  -2 -14   5   68.10   13.04
  -1 -14   5   10.87   29.24
   0 -14   5   26.59   28.59
   1 -14   5   20.61   20.84
   2 -14   5    8.56   28.34
   3 -14   5  -36.46   30.02
   4 -14   5  -40.18   31.25
   5 -14   5   18.12   30.86
   6 -14   5  -16.51   31.08
  -8 -14   4    3.64   31.23
  -7 -14   4  -50.39   32.14
  -6 -14   4   19.91   29.71
  -5 -14   4  -27.71   30.42
  -4 -14   4  -37.10   29.50
  -3 -14   4   10.51   29.72
  -2 -14   4    7.20   29.94
  -1 -14   4   13.48   29.34
   0 -14   4   76.32   13.91
   1 -14   4   45.43   13.32
   2 -14   4   20.74   29.08
   3 -14   4   13.65   31.06
   4 -14   4   51.59   13.87
   5 -14   4    9.22   29.72
   6 -14   4  -45.74   33.45
  -9 -14   3    9.00   32.44
  -8 -14   3   33.97   31.26
  -7 -14   3   36.74   29.33
  -6 -14   3   22.47   29.13
  -5 -14   3   35.88   26.63
  -4 -14   3  -34.43   31.08
  -3 -14   3    0.46   28.19
  -2 -14   3   20.16   29.17
  -1 -14   3   -5.04   31.59
   0 -14   3   28.69   20.83
   1 -14   3  -12.94   29.47
   2 -14   3   13.74   28.33
   3 -14   3  -18.68   31.57
   4 -14   3   20.92   20.20
   5 -14   3   30.23   21.20
   6 -14   3   -0.41   30.82
  -9 -14   2   16.55   30.37
  -8 -14   2   39.87   29.52
  -7 -14   2  -33.52   30.34
  -6 -14   2   26.46   20.90
  -5 -14   2    3.15   29.62
  -4 -14   2  -27.15   29.21
  -3 -14   2   66.74   13.83
  -2 -14   2   18.31   19.42
  -1 -14   2  144.45   14.06
   0 -14   2  -15.60   29.16
   1 -14   2   36.97   12.99
   2 -14   2   26.37   19.80
   3 -14   2   26.42   30.22
   4 -14   2   26.43   29.11
   5 -14   2  -15.92   33.72
   6 -14   2   -1.81   30.30
 -10 -14   1   41.47   13.74
  -9 -14   1  -18.39   33.24
  -8 -14   1   47.00   13.65
  -7 -14   1   21.36   29.51
  -6 -14   1   30.53   12.63
  -5 -14   1  -60.43   30.39
  -4 -14   1   40.86   13.11
  -3 -14   1  101.06   13.49
  -2 -14   1  -14.47   26.89
  -1 -14   1   90.16   13.68
   0 -14   1  -31.62   29.44
   1 -14   1  -24.68   29.68
   2 -14   1  -26.02   28.15
   3 -14   1   42.78   13.61
   4 -14   1   -8.18   29.19
   5 -14   1   -5.22   30.06
   6 -14   1    9.04   30.38
 -10 -14   0   16.31   32.09
  -9 -14   0   37.85   13.32
  -8 -14   0  -58.32   32.70
  -7 -14   0   -9.23   29.33
  -6 -14   0   18.04   20.20
  -5 -14   0   38.41   27.15
  -4 -14   0   22.10   26.56
  -3 -14   0   89.19   12.73
  -2 -14   0   -4.06   28.53
  -1 -14   0   -5.61   29.73
   0 -14   0   -9.86   29.05
   1 -14   0  -10.18   28.91
   2 -14   0   34.52   28.30
   3 -14   0    7.98   20.78
   4 -14   0    9.52   30.99
   5 -14   0  -37.56   30.58
   6 -14   0   -3.68   32.26
 -10 -14  -1   -8.94   30.22
  -9 -14  -1   15.40   29.41
  -8 -14  -1  -26.75   30.39
  -7 -14  -1  -13.18   29.56
  -6 -14  -1   12.43   29.32
  -5 -14  -1   27.45   27.39
  -4 -14  -1  -78.34   29.51
  -3 -14  -1   -0.48   27.05
  -2 -14  -1   25.46   13.37
  -1 -14  -1   -2.38   30.37
   0 -14  -1  -11.33   28.26
   1 -14  -1   38.02   28.05
   2 -14  -1   34.84   13.10
   3 -14  -1    0.90   28.81
   4 -14  -1  -11.01   30.60
   5 -14  -1  -24.18   34.28
 -11 -14  -2   41.49   30.19
 -10 -14  -2  -44.48   33.50
  -9 -14  -2   10.06   28.81
  -8 -14  -2   43.65   29.56
  -7 -14  -2   32.23   29.98
  -6 -14  -2   34.08   29.16
  -5 -14  -2  152.08   13.90
  -4 -14  -2   -1.67   29.17
  -3 -14  -2   61.91   12.98
  -2 -14  -2   14.00   28.74
  -1 -14  -2  -29.55   29.54
   0 -14  -2   11.96   27.96
   1 -14  -2   -7.10   20.98
   2 -14  -2  -28.88   28.98
   3 -14  -2   24.42   28.36
   4 -14  -2   15.51   29.31
   5 -14  -2   26.42   28.77
 -11 -14  -3  -26.81   32.28
 -10 -14  -3   32.91   13.91
  -9 -14  -3  -50.49   32.63
  -8 -14  -3   16.56   28.05
  -7 -14  -3    3.23   29.25
  -6 -14  -3   40.16   13.62
  -5 -14  -3  -23.95   30.04
  -4 -14  -3   55.57   13.02
  -3 -14  -3  -17.59   29.15
  -2 -14  -3   75.66   12.61
  -1 -14  -3   23.11   20.07
   0 -14  -3   76.36   13.27
   1 -14  -3   42.28   28.23
   2 -14  -3   14.10   14.35
   3 -14  -3   -7.78   29.11
   4 -14  -3   27.64   13.37
   5 -14  -3  -16.63   31.30
 -11 -14  -4    8.37   30.12
 -10 -14  -4   31.10   31.45
  -9 -14  -4  -21.57   31.88
  -8 -14  -4  -42.72   31.27
  -7 -14  -4   42.11   13.41
  -6 -14  -4   58.97   13.18
  -5 -14  -4   20.26   20.51
  -4 -14  -4   30.40   20.95
  -3 -14  -4  -17.97   28.56
  -2 -14  -4   28.06   29.40
  -1 -14  -4   21.48   27.28
   0 -14  -4   19.58   27.84
   1 -14  -4   70.38   13.55
   2 -14  -4   19.81   29.86
   3 -14  -4   12.36   29.58
   4 -14  -4   -2.68   31.52
 -11 -14  -5   37.06   32.90
 -10 -14  -5   20.09   31.39
  -9 -14  -5  -22.08   30.52
  -8 -14  -5   31.98   29.80
  -7 -14  -5   29.65   13.23
  -6 -14  -5    6.03   28.11
  -5 -14  -5   18.35   16.22
  -4 -14  -5  -10.34   28.42
  -3 -14  -5    8.33   29.70
  -2 -14  -5  -84.43   31.48
  -1 -14  -5   26.06   28.40
   0 -14  -5   14.47   29.51
   1 -14  -5   -5.96   28.89
   2 -14  -5  -30.01   30.32
   3 -14  -5   26.94   30.42
   4 -14  -5  -37.97   32.82
 -11 -14  -6   16.87   30.96
 -10 -14  -6  -18.14   31.88
  -9 -14  -6    2.08   30.94
  -8 -14  -6  -18.25   32.69
  -7 -14  -6  -21.60   30.56
  -6 -14  -6   36.11   30.89
  -5 -14  -6   28.02   13.50
  -4 -14  -6  -16.68   28.85
  -3 -14  -6  -14.73   28.67
  -2 -14  -6   30.08   12.73
  -1 -14  -6  -29.12   28.83
   0 -14  -6   -7.68   30.60
   1 -14  -6   18.04   28.81
   2 -14  -6   49.21   13.69
   3 -14  -6   19.47   20.84
 -11 -14  -7  -27.33   35.79
 -10 -14  -7   43.91   14.94
  -9 -14  -7  -34.02   31.92
  -8 -14  -7   30.47   30.52
  -7 -14  -7  232.64   20.36
  -6 -14  -7   39.62   27.81
  -5 -14  -7  -31.07   29.58
  -4 -14  -7    4.40   30.61
  -3 -14  -7  -42.90   29.21
  -2 -14  -7   17.80   29.56
  -1 -14  -7  -37.10   31.13
   0 -14  -7   40.77   27.52
   1 -14  -7    5.79   28.85
   2 -14  -7   -1.89   29.52
 -10 -14  -8  -11.70   33.74
  -9 -14  -8   -5.67   32.21
  -8 -14  -8   20.57   31.86
  -7 -14  -8    7.64   31.31
  -6 -14  -8   36.02   27.62
  -5 -14  -8   24.92   22.24
  -4 -14  -8    6.71   28.90
  -3 -14  -8   34.55   29.33
  -2 -14  -8  -33.20   32.06
  -1 -14  -8  -34.60   30.46
   0 -14  -8   25.60   29.46
   1 -14  -8   -8.92   30.70
 -10 -14  -9   -8.74   34.75
  -9 -14  -9   34.22   29.73
  -8 -14  -9   32.40   32.25
  -7 -14  -9   13.74   29.52
  -6 -14  -9    5.08   29.36
  -5 -14  -9   47.94   14.43
  -4 -14  -9   65.80   14.21
  -3 -14  -9   37.24   30.76
  -2 -14  -9  -34.36   31.61
  -1 -14  -9   34.40   31.67
   0 -14  -9  -17.05   31.88
  -9 -14 -10   10.26   32.11
  -8 -14 -10  -55.86   33.92
  -7 -14 -10   18.74   30.13
  -6 -14 -10   -5.60   33.00
  -5 -14 -10   20.29   30.68
  -4 -14 -10   15.94   29.45
  -3 -14 -10   23.50   31.38
  -2 -14 -10  -25.41   32.89
  -1 -14 -10  -17.53   32.44
  -8 -14 -11   13.71   32.06
  -7 -14 -11   30.86   30.75
  -6 -14 -11   16.43   22.59
  -5 -14 -11   16.33   31.12
  -4 -14 -11    0.27   32.89
  -3 -14 -11   36.10   30.92
   0 -15   8  -26.58   34.22
  -3 -15   7   -8.18   31.36
  -2 -15   7   28.37   30.51
  -1 -15   7   24.55   21.59
   0 -15   7   40.48   31.83
   1 -15   7   23.27   15.97
   2 -15   7  -12.58   32.29
  -4 -15   6  -17.16   33.25
  -3 -15   6  -26.46   32.89
  -2 -15   6   39.54   29.75
  -1 -15   6   -8.45   30.56
   0 -15   6   39.39   32.68
   1 -15   6   10.49   32.47
   2 -15   6   13.24   30.64
   3 -15   6  -38.22   32.64
  -6 -15   5   28.66   29.28
  -5 -15   5   -3.30   33.22
  -4 -15   5   43.76   29.60
  -3 -15   5  -22.77   30.37
  -2 -15   5   15.05   30.04
  -1 -15   5   28.35   14.07
   0 -15   5    4.58   31.09
   1 -15   5   -7.69   31.20
   2 -15   5   23.32   30.74
   3 -15   5   -5.98   29.86
   4 -15   5  -34.15   32.82
  -6 -15   4  -11.92   32.74
  -5 -15   4  -14.18   32.26
  -4 -15   4   16.19   18.21
  -3 -15   4   22.34   30.87
  -2 -15   4  -15.23   30.58
  -1 -15   4   -5.56   31.63
   0 -15   4   17.43   31.10
   1 -15   4  -18.32   31.38
   2 -15   4   16.70   31.75
   3 -15   4  -11.40   31.62
   4 -15   4  -31.12   31.95
  -7 -15   3   16.30   31.69
  -6 -15   3   -0.21   31.88
  -5 -15   3   27.86   29.12
  -4 -15   3   -5.15   30.27
  -3 -15   3   15.05   30.80
  -2 -15   3   -9.98   30.45
  -1 -15   3    6.34   30.63
   0 -15   3   36.67   30.11
   1 -15   3    4.82   29.38
   2 -15   3    7.17   30.29
   3 -15   3    4.44   30.82
   4 -15   3   35.91   29.82
  -8 -15   2   -6.53   32.59
  -7 -15   2  -41.94   33.83
  -6 -15   2   -7.79   31.76
  -5 -15   2   36.48   31.03
  -4 -15   2  -71.65   32.48
  -3 -15   2  -50.20   32.83
  -2 -15   2   11.20   30.25
  -1 -15   2   22.84   31.55
   0 -15   2  -52.46   31.01
   1 -15   2   12.92   30.11
   2 -15   2   41.66   30.90
   3 -15   2   -7.03   32.30
   4 -15   2  -24.49   33.07
  -8 -15   1   -8.81   33.17
  -7 -15   1   29.61   13.97
  -6 -15   1    5.38   29.51
  -5 -15   1   27.08   28.92
  -4 -15   1   31.71   22.15
  -3 -15   1   48.36   13.74
  -2 -15   1   29.78   29.02
  -1 -15   1    5.67   30.93
   0 -15   1   13.01   29.79
   1 -15   1  -19.99   30.69
   2 -15   1   17.75   30.85
   3 -15   1  -24.97   32.75
   4 -15   1   -5.74   31.92
  -9 -15   0  -31.22   32.53
  -8 -15   0   -9.70   30.73
  -7 -15   0   42.41   31.53
  -6 -15   0   15.18   31.07
  -5 -15   0    8.74   30.84
  -4 -15   0   47.94   13.75
  -3 -15   0  -31.33   30.39
  -2 -15   0   21.23   20.17
  -1 -15   0  -12.92   30.95
   0 -15   0   20.81   16.87
   1 -15   0   -7.76   29.39
   2 -15   0    1.70   32.22
   3 -15   0    0.23   30.59
   4 -15   0   18.14   31.31
  -9 -15  -1  -70.25   34.61
  -8 -15  -1  -15.20   30.48
  -7 -15  -1    3.80   28.91
  -6 -15  -1   -9.53   29.97
  -5 -15  -1  -44.51   32.03
  -4 -15  -1    8.21   30.11
  -3 -15  -1   15.89   29.72
  -2 -15  -1  -36.96   30.27
  -1 -15  -1   30.42   13.55
   0 -15  -1  -33.53   30.98
   1 -15  -1   21.57   12.68
   2 -15  -1   35.99   30.76
   3 -15  -1   14.68   30.17
   4 -15  -1  -46.32   32.62
  -9 -15  -2  -54.33   32.92
  -8 -15  -2   -5.78   31.69
  -7 -15  -2   -1.03   30.02
  -6 -15  -2    6.08   32.34
  -5 -15  -2  -20.90   30.65
  -4 -15  -2   39.58   12.80
  -3 -15  -2   39.10   29.79
  -2 -15  -2   69.77   13.63
  -1 -15  -2    5.88   29.82
   0 -15  -2   -8.72   27.39
   1 -15  -2  -10.45   29.80
   2 -15  -2   40.51   28.20
   3 -15  -2   27.15   28.18
  -9 -15  -3    4.02   33.21
  -8 -15  -3  -24.20   31.85
  -7 -15  -3   25.50   31.03
  -6 -15  -3   -1.72   32.41
  -5 -15  -3    1.31   30.20
  -4 -15  -3   38.82   28.85
  -3 -15  -3    3.11   28.62
  -2 -15  -3    6.33   29.46
  -1 -15  -3  -33.27   30.24
   0 -15  -3    6.62   29.72
   1 -15  -3   -5.00   29.66
   2 -15  -3  -23.00   31.28
   3 -15  -3    1.41   29.07
  -9 -15  -4   64.22   14.41
  -8 -15  -4   34.72   28.12
  -7 -15  -4    6.13   30.24
  -6 -15  -4  -21.51   29.36
  -5 -15  -4   14.88   30.45
  -4 -15  -4  -19.31   30.77
  -3 -15  -4  -41.70   29.48
  -2 -15  -4  -15.02   29.39
  -1 -15  -4  -26.59   29.31
   0 -15  -4  -47.22   32.39
   1 -15  -4  -11.41   30.83
[truncated: 535,413 more chars]
