# Supplementary material for: Syntheses, Structures, and Electrochemical Properties of Metallacyclic Oxidovanadium(V) Complexes with Asymmetric Multidentate Linking Ligands
Source: Molecules. 2024 Apr 9;29(8):1700. doi: 10.3390/molecules29081700 (PMC11052122; doi:10.3390/molecules29081700)
Supplement: Supplementary file 1 [file molecules-29-01700-s001.zip › Complex4.cif]

data_global
_audit_creation_date                               2021-07-07
_audit_creation_method                            'by CrystalStructure 4.3'
_audit_update_record                               ?

#==============================================================================
# PROCESSING SUMMARY (IUCr Office Use Only)

_journal_date_recd_electronic                      ?
_journal_date_from_coeditor                        ?
_journal_date_accepted                             ?
_journal_coeditor_code                             ?

#==============================================================================
# SUBMISSION DETAILS

_publ_contact_author_name                         'ENTER NAME'
_publ_contact_author_email                        'ENTER EMAIL ADDRESS'
_publ_contact_author_fax                          'ENTER FAX NUMBER'
_publ_contact_author_phone                        'ENTER PHONE NUMBER'
_publ_contact_letter
;
    ENTER TEXT OF LETTER
;
_publ_requested_journal                           'ENTER JOURNAL NAME HERE'
_publ_requested_category
                                               'CHOOSE FI FM FO CI CM CO or AD'
_publ_requested_coeditor_name                      ?

#==============================================================================
# TITLE AND AUTHOR LIST

_publ_section_title
;
    ENTER SECTION TITLE
;
_publ_section_title_footnote
;
    ENTER FOOTNOTE TO TITLE OF PAPER
;
loop_
_publ_author_name
_publ_author_footnote
_publ_author_address
' FIRST AUTHORS NAME '
;
  FIRST AUTHORS FOOTNOTES
;
;
  FIRST AUTHORS ADDRESS
;
_publ_section_synopsis
;
    ENTER SYNOPSIS
;

#==============================================================================
# TEXT

_publ_section_abstract
;
    ENTER ABSTRACT
;
_publ_section_comment
;
    ENTER TEXT
;
_publ_section_references
;
    ENTER OTHER REFERENCES

    Rigaku (2018). CrystalStructure. Version 4.3. 
    Rigaku Corporation, Tokyo, Japan.

    Altomare, A., Cascarano, G., Giacovazzo, C. and Guagliardi, A. 
    (1993). J. Appl. Cryst. 26, 343-350.
    SIR92

    Sheldrick, G.M. (2008) SHELXL Version 2016/6, Acta Cryst. A64, 112-122.

;
_publ_section_figure_captions
;
    ENTER FIGURE CAPTIONS
;
_publ_section_exptl_prep
;
    ENTER COMPOUND PREPARATION DETAILS
;
_publ_section_exptl_refinement
;
    ENTER SPECIAL DETAILS OF THE REFINEMENT
;

#==============================================================================
data_(HNEt3)[VO2(L5-H)]

#==============================================================================
# CHEMICAL DATA

_chemical_formula_sum                             'C26 H28 N3 O6 V'
_chemical_formula_moiety                          'C26 H28 N3 O6 V'
_chemical_formula_weight                           529.47
_chemical_melting_point                            ?

#==============================================================================
# CRYSTAL DATA
_space_group_crystal_system                        monoclinic
_space_group_name_H-M_alt                         'P 1 21/n 1'
_space_group_name_Hall                            '-P 2yn'
_space_group_IT_number                             14
loop_
_space_group_symop_id
_space_group_symop_operation_xyz
1   '+X,+Y,+Z'
2   '1/2-X,1/2+Y,1/2-Z'
3   '-X,-Y,-Z'
4   '-1/2+X,-1/2-Y,-1/2+Z'
#------------------------------------------------------------------------------
_cell_length_a                                     11.978(3)
_cell_length_b                                     7.5880(14)
_cell_length_c                                     28.042(5)
_cell_angle_alpha                                  90.0000
_cell_angle_beta                                   101.705(18)
_cell_angle_gamma                                  90.0000
_cell_volume                                       2495.7(8)
_cell_formula_units_Z                              4
_cell_measurement_reflns_used                      21
_cell_measurement_theta_min                        10.19
_cell_measurement_theta_max                        12.22
_cell_measurement_temperature                      301
#------------------------------------------------------------------------------
_exptl_crystal_description                         prismatic
_exptl_crystal_colour                              orange
_exptl_crystal_size_max                            0.400
_exptl_crystal_size_mid                            0.200
_exptl_crystal_size_min                            0.100
_exptl_crystal_density_diffrn                      1.409
_exptl_crystal_density_meas                        ?
_exptl_crystal_density_method                     'not measured'
_exptl_crystal_F_000                               1104.00
_exptl_absorpt_coefficient_mu                      0.444
_exptl_absorpt_correction_type                     none

#==============================================================================
# EXPERIMENTAL DATA

_diffrn_ambient_temperature                        301
_diffrn_radiation_type                            'Mo K\a'
_diffrn_radiation_wavelength                       0.71069
_diffrn_measurement_device_type                   'Rigaku AFC5S'
_diffrn_measurement_method                         \w
_diffrn_reflns_number                              5577
_diffrn_reflns_av_unetI/netI                       0.2359
_diffrn_reflns_av_R_equivalents                    0.0735
_diffrn_reflns_theta_max                           27.499
_diffrn_reflns_theta_min                           2.530
_diffrn_reflns_theta_full                          25.240
_diffrn_measured_fraction_theta_max                0.955
_diffrn_measured_fraction_theta_full               0.988
_diffrn_reflns_Laue_measured_fraction_max          0.955
_diffrn_reflns_Laue_measured_fraction_full         0.988
_diffrn_reflns_point_group_measured_fraction_max   0.955
_diffrn_reflns_point_group_measured_fraction_full  0.988
_diffrn_reflns_limit_h_min                        -15
_diffrn_reflns_limit_h_max                         14
_diffrn_reflns_limit_k_min                         0
_diffrn_reflns_limit_k_max                         9
_diffrn_reflns_limit_l_min                        -36
_diffrn_reflns_limit_l_max                         0
_diffrn_standards_number                           3
_diffrn_standards_interval_count                   0
_diffrn_standards_decay_%                         -0.977
_reflns_number_total                               5478
_reflns_number_gt                                  1828
_reflns_threshold_expression                       F^2^>2.0\s(F^2^)
_reflns_Friedel_coverage          0.000
_reflns_Friedel_fraction_max      .
_reflns_Friedel_fraction_full     .

#==============================================================================
# REFINEMENT DATA

_refine_special_details
;
    Refinement was performed using all reflections. The weighted 
    R-factor (wR) and goodness of fit (S) are based on F^2^.
    R-factor (gt) are based on F. The threshold expression of
    F^2^ > 2.0 sigma(F^2^) is used only for calculating R-factor (gt).
;
_refine_ls_structure_factor_coef                   Fsqd
_refine_ls_R_factor_all                            0.2748
_refine_ls_R_factor_gt                             0.0790
_refine_ls_wR_factor_ref                           0.3181
_refine_ls_wR_factor_gt                            0.2160
_refine_ls_number_restraints                       101
_refine_ls_hydrogen_treatment                      mixed
_refine_ls_number_reflns                           5478
_refine_ls_number_parameters                       329
_refine_ls_goodness_of_fit_ref                     0.947
_refine_ls_weighting_scheme                        calc
_refine_ls_weighting_details
                   'w = 1/[\s^2^(Fo^2^)+(0.1633P)^2^] where P=(Fo^2^+2Fc^2^)/3'
_atom_sites_solution_hydrogens                     geom
_atom_sites_solution_primary                       direct
_atom_sites_solution_secondary                     difmap
_refine_ls_shift/su_max                            0.002
_refine_diff_density_max                           0.64
_refine_diff_density_min                          -0.60
_refine_ls_extinction_method                       none
_refine_ls_extinction_coef                         ?

loop_
_atom_type_symbol
_atom_type_description
_atom_type_scat_dispersion_real
_atom_type_scat_dispersion_imag
_atom_type_scat_source
  'C' 'C'  0.0033 0.0016 
;
International Tables for Crystallography
(Vol. C, Tables 4.2.6.8 and 6.1.1.4)
;
  'H' 'H'  0.0000 0.0000 
;
International Tables for Crystallography
(Vol. C, Table 6.1.1.4)
;
  'N' 'N'  0.0061 0.0033 
;
International Tables for Crystallography
(Vol. C, Tables 4.2.6.8 and 6.1.1.4)
;
  'O' 'O'  0.0106 0.0060 
;
International Tables for Crystallography
(Vol. C, Tables 4.2.6.8 and 6.1.1.4)
;
  'V' 'V'  0.3005 0.5294 
;
International Tables for Crystallography
(Vol. C, Tables 4.2.6.8 and 6.1.1.4)
;

#==============================================================================
# ATOMIC COORDINATES AND THERMAL PARAMETERS

loop_
 _atom_site_label
 _atom_site_type_symbol
 _atom_site_fract_x
 _atom_site_fract_y
 _atom_site_fract_z
 _atom_site_U_iso_or_equiv
 _atom_site_adp_type
 _atom_site_occupancy
 _atom_site_site_symmetry_order  
 _atom_site_calc_flag
 _atom_site_refinement_flags_posn
 _atom_site_refinement_flags_adp
 _atom_site_refinement_flags_occupancy
 _atom_site_disorder_assembly
 _atom_site_disorder_group
V1 V 0.82837(10) 0.90390(18) 0.39205(4) 0.0481(4) Uani 1 1 d . U . . .
O1 O 0.9685(4) 0.9034(7) 0.37142(18) 0.0586(13) Uani 1 1 d . U . . .
O2 O 0.7258(4) 0.7461(7) 0.41653(18) 0.0550(14) Uani 1 1 d . U . . .
O3 O 0.6474(4) 0.4686(7) 0.56085(18) 0.0535(13) Uani 1 1 d . U . . .
O4 O 0.8752(6) 0.3849(10) 0.6944(2) 0.078(2) Uani 1 1 d . U . . .
H12 H 0.887(6) 0.404(11) 0.669(3) 0.05(2) Uiso 1 1 d . . . . .
O5 O 0.7481(4) 0.9124(8) 0.33708(17) 0.0596(14) Uani 1 1 d . U . . .
O6 O 0.8195(4) 1.0984(7) 0.4157(2) 0.0633(14) Uani 1 1 d . U . . .
N1 N 0.9347(5) 0.7827(8) 0.4573(2) 0.0445(14) Uani 1 1 d . U . . .
N2 N 0.8281(5) 0.4891(8) 0.6018(2) 0.0496(15) Uani 1 1 d . U . . .
N3 N 0.6869(7) 0.2834(9) 0.3286(3) 0.073(2) Uani 1 1 d . U . . .
H28 H 0.715372 0.167533 0.340823 0.087 Uiso 1 1 calc R U . . .
C1 C 1.0746(6) 0.9417(9) 0.3949(3) 0.0497(17) Uani 1 1 d . U . . .
C2 C 1.1480(7) 1.0190(11) 0.3690(3) 0.061(2) Uani 1 1 d . U . . .
H1 H 1.122474 1.046860 0.336300 0.073 Uiso 1 1 calc R U . . .
C3 C 1.2594(7) 1.0553(11) 0.3915(3) 0.064(2) Uani 1 1 d . U . . .
H2 H 1.307929 1.109860 0.374020 0.077 Uiso 1 1 calc R U . . .
C4 C 1.2989(7) 1.0111(11) 0.4395(3) 0.062(2) Uani 1 1 d . U . . .
H3 H 1.374016 1.035604 0.454388 0.074 Uiso 1 1 calc R U . . .
C5 C 1.2281(6) 0.9314(10) 0.4655(3) 0.0509(18) Uani 1 1 d . U . . .
H4 H 1.255548 0.900138 0.497789 0.061 Uiso 1 1 calc R U . . .
C6 C 1.1130(6) 0.8961(9) 0.4434(2) 0.0416(15) Uani 1 1 d . U . . .
C7 C 1.0431(6) 0.8129(10) 0.4722(3) 0.0475(17) Uani 1 1 d . U . . .
H5 H 1.077001 0.777936 0.503554 0.057 Uiso 1 1 calc R U . . .
C8 C 0.8687(6) 0.6956(9) 0.4863(3) 0.0420(16) Uani 1 1 d . U . . .
C9 C 0.7522(6) 0.6829(10) 0.4613(3) 0.0495(18) Uani 1 1 d . U . . .
C10 C 0.6707(6) 0.6043(11) 0.4841(3) 0.0512(18) Uani 1 1 d . U . . .
H6 H 0.594423 0.594876 0.468768 0.061 Uiso 1 1 calc R U . . .
C11 C 0.7100(6) 0.5429(10) 0.5299(3) 0.0463(16) Uani 1 1 d . U . . .
C12 C 0.8236(6) 0.5569(9) 0.5551(3) 0.0437(16) Uani 1 1 d . U . . .
C13 C 0.9039(6) 0.6334(9) 0.5339(3) 0.0442(16) Uani 1 1 d . U . . .
H7 H 0.979180 0.644017 0.550411 0.053 Uiso 1 1 calc R U . . .
C14 C 0.7249(6) 0.4385(10) 0.6038(3) 0.0452(16) Uani 1 1 d . U . . .
C15 C 0.6865(7) 0.3599(9) 0.6438(3) 0.0490(17) Uani 1 1 d . U . . .
C16 C 0.5740(7) 0.2985(10) 0.6401(3) 0.0525(18) Uani 1 1 d . U . . .
H8 H 0.522186 0.310434 0.610675 0.063 Uiso 1 1 calc R U . . .
C17 C 0.5397(7) 0.2220(11) 0.6786(3) 0.064(2) Uani 1 1 d . U . . .
H9 H 0.465027 0.182400 0.675335 0.077 Uiso 1 1 calc R U . . .
C18 C 0.6152(9) 0.2033(13) 0.7223(3) 0.077(3) Uani 1 1 d . U . . .
H10 H 0.591057 0.154885 0.748917 0.092 Uiso 1 1 calc R U . . .
C19 C 0.7293(8) 0.2578(13) 0.7266(3) 0.074(3) Uani 1 1 d . U . . .
H11 H 0.781569 0.241058 0.755643 0.089 Uiso 1 1 calc R U . . .
C20 C 0.7624(7) 0.3347(11) 0.6880(3) 0.0552(19) Uani 1 1 d . U . . .
C21 C 0.7933(14) 0.4111(15) 0.3368(5) 0.127(4) Uani 1 1 d . U . . .
H13 H 0.768596 0.526988 0.324294 0.153 Uiso 1 1 calc R U . . .
H14 H 0.823442 0.422413 0.371442 0.153 Uiso 1 1 calc R U . . .
C22 C 0.8811(13) 0.351(3) 0.3137(9) 0.216(10) Uani 1 1 d . U . . .
H15 H 0.943453 0.433197 0.319780 0.259 Uiso 1 1 calc R U . . .
H16 H 0.907156 0.237654 0.326385 0.259 Uiso 1 1 calc R U . . .
H17 H 0.852302 0.342245 0.279230 0.259 Uiso 1 1 calc R U . . .
C23 C 0.6355(9) 0.2603(15) 0.2767(4) 0.093(3) Uani 1 1 d . U . . .
H18 H 0.580080 0.165546 0.273626 0.112 Uiso 1 1 calc R U . . .
H19 H 0.694632 0.224143 0.259729 0.112 Uiso 1 1 calc R U . . .
C24 C 0.5782(11) 0.4199(18) 0.2523(4) 0.117(4) Uani 1 1 d . U . . .
H20 H 0.547097 0.393662 0.218735 0.141 Uiso 1 1 calc R U . . .
H21 H 0.517871 0.455082 0.268161 0.141 Uiso 1 1 calc R U . . .
H22 H 0.632619 0.513780 0.254240 0.141 Uiso 1 1 calc R U . . .
C25 C 0.6190(16) 0.345(2) 0.3601(6) 0.156(6) Uani 1 1 d . U . . .
H23 H 0.670047 0.395401 0.388214 0.187 Uiso 1 1 calc R U . . .
H24 H 0.573844 0.442081 0.343742 0.187 Uiso 1 1 calc R U . . .
C26 C 0.5450(10) 0.2339(19) 0.3777(8) 0.181(8) Uani 1 1 d . U . . .
H25 H 0.505762 0.298615 0.398663 0.217 Uiso 1 1 calc R U . . .
H26 H 0.490608 0.186431 0.350834 0.217 Uiso 1 1 calc R U . . .
H27 H 0.587447 0.139442 0.395600 0.217 Uiso 1 1 calc R U . . .

loop_
 _atom_site_aniso_label
 _atom_site_aniso_U_11
 _atom_site_aniso_U_22
 _atom_site_aniso_U_33
 _atom_site_aniso_U_23
 _atom_site_aniso_U_13
 _atom_site_aniso_U_12
V1 0.0435(7) 0.0475(8) 0.0497(8) 0.0073(7) 0.0006(5) 0.0020(6)
O1 0.050(3) 0.062(3) 0.058(3) 0.005(3) -0.002(2) 0.000(3)
O2 0.047(3) 0.061(3) 0.051(3) 0.011(3) -0.004(2) -0.015(2)
O3 0.048(3) 0.051(3) 0.057(3) 0.004(3) 0.002(2) 0.001(2)
O4 0.076(4) 0.102(6) 0.049(4) 0.004(4) -0.006(3) -0.015(4)
O5 0.052(3) 0.081(4) 0.044(3) 0.010(3) 0.005(2) -0.008(3)
O6 0.065(3) 0.047(3) 0.075(4) 0.005(3) 0.009(3) 0.006(3)
N1 0.043(3) 0.037(3) 0.052(3) -0.002(3) 0.006(3) 0.004(3)
N2 0.055(3) 0.041(3) 0.051(3) 0.002(3) 0.006(3) 0.001(3)
N3 0.090(5) 0.051(4) 0.080(5) 0.016(4) 0.023(4) 0.041(4)
C1 0.046(4) 0.039(4) 0.065(4) -0.004(4) 0.013(3) 0.002(3)
C2 0.059(4) 0.056(5) 0.064(5) 0.004(4) 0.004(4) -0.003(4)
C3 0.057(4) 0.059(6) 0.079(5) -0.002(4) 0.023(4) 0.000(4)
C4 0.042(4) 0.061(5) 0.082(5) -0.014(5) 0.010(4) -0.008(4)
C5 0.048(4) 0.048(5) 0.053(4) -0.011(4) 0.003(3) 0.001(3)
C6 0.044(3) 0.034(4) 0.048(4) -0.010(3) 0.013(3) 0.005(3)
C7 0.049(4) 0.037(4) 0.051(4) 0.002(3) 0.000(3) 0.002(3)
C8 0.040(3) 0.037(4) 0.049(4) -0.003(3) 0.009(3) 0.005(3)
C9 0.047(4) 0.046(4) 0.050(4) -0.001(3) -0.002(3) -0.003(3)
C10 0.041(4) 0.055(5) 0.055(4) 0.001(4) 0.004(3) -0.002(4)
C11 0.044(4) 0.038(4) 0.055(4) -0.004(3) 0.006(3) 0.003(3)
C12 0.044(3) 0.035(4) 0.049(4) -0.008(3) 0.002(3) 0.008(3)
C13 0.040(4) 0.038(4) 0.051(4) -0.003(3) 0.001(3) 0.006(3)
C14 0.050(4) 0.044(4) 0.043(3) -0.006(3) 0.011(3) 0.012(3)
C15 0.057(4) 0.034(4) 0.056(4) -0.001(3) 0.012(3) 0.000(3)
C16 0.058(4) 0.043(5) 0.058(4) 0.005(4) 0.016(4) 0.010(4)
C17 0.061(5) 0.056(5) 0.077(5) 0.013(4) 0.020(4) 0.011(4)
C18 0.089(6) 0.080(7) 0.065(5) 0.026(5) 0.026(5) 0.004(5)
C19 0.089(5) 0.081(7) 0.049(5) 0.012(5) 0.003(4) 0.007(5)
C20 0.066(4) 0.048(5) 0.053(4) 0.000(4) 0.014(4) 0.001(4)
C21 0.181(10) 0.045(6) 0.130(10) 0.003(7) -0.029(8) -0.019(7)
C22 0.090(9) 0.190(19) 0.36(3) 0.115(18) 0.034(12) -0.027(11)
C23 0.088(7) 0.077(7) 0.108(7) -0.019(6) 0.006(6) 0.005(6)
C24 0.128(10) 0.131(10) 0.075(7) 0.006(7) -0.022(7) 0.024(8)
C25 0.230(15) 0.120(11) 0.149(10) 0.057(9) 0.109(12) 0.091(10)
C26 0.072(7) 0.100(10) 0.40(3) -0.066(13) 0.123(12) -0.017(7)

#==============================================================================
_computing_data_collection
                                'MSC/AFC Diffractometer Control (Rigaku, 1998)'
_computing_cell_refinement
                                               'MSC/AFC Diffractometer Control'
_computing_data_reduction
                                               'MSC/AFC Diffractometer Control'
_computing_structure_solution
                                               'SIR92 (Altomare, et al., 1994)'
_computing_structure_refinement
                                      'SHELXL Version 2016/6 (Sheldrick, 2008)'
_computing_publication_material
                                          'CrystalStructure 4.3 (Rigaku, 2018)'
_computing_molecular_graphics                     'CrystalStructure 4.3'

#==============================================================================
# MOLECULAR GEOMETRY

_geom_special_details
;
 All esds (except the esd in the dihedral angle between two l.s. planes)
 are estimated using the full covariance matrix.  The cell esds are taken
 into account individually in the estimation of esds in distances, angles
 and torsion angles; correlations between esds in cell parameters are only
 used when they are defined by crystal symmetry.  An approximate (isotropic)
 treatment of cell esds is used for estimating esds involving l.s. planes.
;

loop_
 _geom_bond_atom_site_label_1
 _geom_bond_atom_site_label_2
 _geom_bond_distance
 _geom_bond_site_symmetry_2
 _geom_bond_publ_flag
V1 O6 1.630(6) . ?
V1 O5 1.644(5) . ?
V1 O1 1.884(5) . ?
V1 O2 1.939(5) . ?
V1 N1 2.206(6) . ?
O1 C1 1.339(9) . ?
O2 C9 1.320(8) . ?
O3 C11 1.377(9) . ?
O3 C14 1.382(8) . ?
O4 C20 1.380(10) . ?
O4 H12 0.77(7) . ?
N1 C7 1.301(9) . ?
N1 C8 1.409(9) . ?
N2 C14 1.306(9) . ?
N2 C12 1.399(9) . ?
N3 C25 1.399(14) . ?
N3 C23 1.470(11) . ?
N3 C21 1.580(15) . ?
N3 H28 0.9800 . ?
C1 C2 1.379(11) . ?
C1 C6 1.389(10) . ?
C2 C3 1.383(11) . ?
C2 H1 0.9300 . ?
C3 C4 1.376(11) . ?
C3 H2 0.9300 . ?
C4 C5 1.365(11) . ?
C4 H3 0.9300 . ?
C5 C6 1.418(9) . ?
C5 H4 0.9300 . ?
C6 C7 1.422(10) . ?
C7 H5 0.9300 . ?
C8 C13 1.399(9) . ?
C8 C9 1.432(9) . ?
C9 C10 1.404(10) . ?
C10 C11 1.358(10) . ?
C10 H6 0.9300 . ?
C11 C12 1.403(9) . ?
C12 C13 1.359(10) . ?
C13 H7 0.9300 . ?
C14 C15 1.426(10) . ?
C15 C20 1.393(10) . ?
C15 C16 1.409(11) . ?
C16 C17 1.361(11) . ?
C16 H8 0.9300 . ?
C17 C18 1.375(12) . ?
C17 H9 0.9300 . ?
C18 C19 1.409(13) . ?
C18 H10 0.9300 . ?
C19 C20 1.358(11) . ?
C19 H11 0.9300 . ?
C21 C22 1.42(2) . ?
C21 H13 0.9700 . ?
C21 H14 0.9700 . ?
C22 H15 0.9600 . ?
C22 H16 0.9600 . ?
C22 H17 0.9600 . ?
C23 C24 1.489(15) . ?
C23 H18 0.9700 . ?
C23 H19 0.9700 . ?
C24 H20 0.9600 . ?
C24 H21 0.9600 . ?
C24 H22 0.9600 . ?
C25 C26 1.386(18) . ?
C25 H23 0.9700 . ?
C25 H24 0.9700 . ?
C26 H25 0.9600 . ?
C26 H26 0.9600 . ?
C26 H27 0.9600 . ?

loop_
 _geom_angle_atom_site_label_1
 _geom_angle_atom_site_label_2
 _geom_angle_atom_site_label_3
 _geom_angle
 _geom_angle_site_symmetry_1
 _geom_angle_site_symmetry_3
 _geom_angle_publ_flag
O6 V1 O5 105.8(3) . . ?
O6 V1 O1 105.2(3) . . ?
O5 V1 O1 95.7(2) . . ?
O6 V1 O2 108.5(3) . . ?
O5 V1 O2 93.7(2) . . ?
O1 V1 O2 140.9(2) . . ?
O6 V1 N1 96.6(2) . . ?
O5 V1 N1 157.4(3) . . ?
O1 V1 N1 81.6(2) . . ?
O2 V1 N1 75.5(2) . . ?
C1 O1 V1 131.7(5) . . ?
C9 O2 V1 120.9(4) . . ?
C11 O3 C14 105.2(5) . . ?
C20 O4 H12 106(6) . . ?
C7 N1 C8 122.6(6) . . ?
C7 N1 V1 124.3(5) . . ?
C8 N1 V1 112.1(4) . . ?
C14 N2 C12 106.9(6) . . ?
C25 N3 C23 119.1(10) . . ?
C25 N3 C21 104.8(11) . . ?
C23 N3 C21 112.4(9) . . ?
C25 N3 H28 106.6 . . ?
C23 N3 H28 106.6 . . ?
C21 N3 H28 106.6 . . ?
O1 C1 C2 118.4(7) . . ?
O1 C1 C6 121.3(7) . . ?
C2 C1 C6 120.1(7) . . ?
C1 C2 C3 120.2(8) . . ?
C1 C2 H1 119.9 . . ?
C3 C2 H1 119.9 . . ?
C4 C3 C2 120.4(8) . . ?
C4 C3 H2 119.8 . . ?
C2 C3 H2 119.8 . . ?
C5 C4 C3 120.1(8) . . ?
C5 C4 H3 119.9 . . ?
C3 C4 H3 119.9 . . ?
C4 C5 C6 120.4(7) . . ?
C4 C5 H4 119.8 . . ?
C6 C5 H4 119.8 . . ?
C1 C6 C5 118.6(7) . . ?
C1 C6 C7 123.4(6) . . ?
C5 C6 C7 118.0(7) . . ?
N1 C7 C6 124.0(7) . . ?
N1 C7 H5 118.0 . . ?
C6 C7 H5 118.0 . . ?
C13 C8 N1 127.8(6) . . ?
C13 C8 C9 121.3(7) . . ?
N1 C8 C9 110.8(6) . . ?
O2 C9 C10 122.2(6) . . ?
O2 C9 C8 117.5(7) . . ?
C10 C9 C8 120.3(7) . . ?
C11 C10 C9 115.9(7) . . ?
C11 C10 H6 122.0 . . ?
C9 C10 H6 122.0 . . ?
C10 C11 O3 127.4(7) . . ?
C10 C11 C12 124.4(7) . . ?
O3 C11 C12 108.1(6) . . ?
C13 C12 N2 132.1(6) . . ?
C13 C12 C11 120.8(7) . . ?
N2 C12 C11 107.0(7) . . ?
C12 C13 C8 117.3(6) . . ?
C12 C13 H7 121.4 . . ?
C8 C13 H7 121.4 . . ?
N2 C14 O3 112.9(6) . . ?
N2 C14 C15 127.9(7) . . ?
O3 C14 C15 119.2(7) . . ?
C20 C15 C16 117.5(8) . . ?
C20 C15 C14 120.1(7) . . ?
C16 C15 C14 122.4(7) . . ?
C17 C16 C15 121.4(8) . . ?
C17 C16 H8 119.3 . . ?
C15 C16 H8 119.3 . . ?
C16 C17 C18 120.1(8) . . ?
C16 C17 H9 120.0 . . ?
C18 C17 H9 120.0 . . ?
C17 C18 C19 119.9(8) . . ?
C17 C18 H10 120.1 . . ?
C19 C18 H10 120.1 . . ?
C20 C19 C18 119.5(8) . . ?
C20 C19 H11 120.3 . . ?
C18 C19 H11 120.3 . . ?
C19 C20 O4 116.8(8) . . ?
C19 C20 C15 121.7(8) . . ?
O4 C20 C15 121.6(7) . . ?
C22 C21 N3 112.9(12) . . ?
C22 C21 H13 109.0 . . ?
N3 C21 H13 109.0 . . ?
C22 C21 H14 109.0 . . ?
N3 C21 H14 109.0 . . ?
H13 C21 H14 107.8 . . ?
C21 C22 H15 109.5 . . ?
C21 C22 H16 109.5 . . ?
H15 C22 H16 109.5 . . ?
C21 C22 H17 109.5 . . ?
H15 C22 H17 109.5 . . ?
H16 C22 H17 109.5 . . ?
N3 C23 C24 114.8(9) . . ?
N3 C23 H18 108.6 . . ?
C24 C23 H18 108.6 . . ?
N3 C23 H19 108.6 . . ?
C24 C23 H19 108.6 . . ?
H18 C23 H19 107.5 . . ?
C23 C24 H20 109.5 . . ?
C23 C24 H21 109.5 . . ?
H20 C24 H21 109.5 . . ?
C23 C24 H22 109.5 . . ?
H20 C24 H22 109.5 . . ?
H21 C24 H22 109.5 . . ?
C26 C25 N3 120.9(14) . . ?
C26 C25 H23 107.1 . . ?
N3 C25 H23 107.1 . . ?
C26 C25 H24 107.1 . . ?
N3 C25 H24 107.1 . . ?
H23 C25 H24 106.8 . . ?
C25 C26 H25 109.5 . . ?
C25 C26 H26 109.5 . . ?
H25 C26 H26 109.5 . . ?
C25 C26 H27 109.5 . . ?
H25 C26 H27 109.5 . . ?
H26 C26 H27 109.5 . . ?

loop_
 _geom_torsion_atom_site_label_1
 _geom_torsion_atom_site_label_2
 _geom_torsion_atom_site_label_3
 _geom_torsion_atom_site_label_4
 _geom_torsion
 _geom_torsion_site_symmetry_1
 _geom_torsion_site_symmetry_2
 _geom_torsion_site_symmetry_3
 _geom_torsion_site_symmetry_4
 _geom_torsion_publ_flag
O6 V1 O1 C1 52.7(7) . . . . ?
O5 V1 O1 C1 160.8(6) . . . . ?
O2 V1 O1 C1 -96.2(7) . . . . ?
N1 V1 O1 C1 -41.9(6) . . . . ?
V1 O1 C1 C2 -146.4(6) . . . . ?
V1 O1 C1 C6 37.3(10) . . . . ?
O1 C1 C2 C3 -177.8(7) . . . . ?
C6 C1 C2 C3 -1.5(12) . . . . ?
C1 C2 C3 C4 1.5(13) . . . . ?
C2 C3 C4 C5 -0.2(13) . . . . ?
C3 C4 C5 C6 -1.0(12) . . . . ?
O1 C1 C6 C5 176.5(6) . . . . ?
C2 C1 C6 C5 0.3(10) . . . . ?
O1 C1 C6 C7 -2.5(11) . . . . ?
C2 C1 C6 C7 -178.7(7) . . . . ?
C4 C5 C6 C1 1.0(10) . . . . ?
C4 C5 C6 C7 -180.0(7) . . . . ?
C8 N1 C7 C6 178.2(7) . . . . ?
V1 N1 C7 C6 -14.3(10) . . . . ?
C1 C6 C7 N1 -5.2(12) . . . . ?
C5 C6 C7 N1 175.8(7) . . . . ?
C7 N1 C8 C13 1.9(11) . . . . ?
V1 N1 C8 C13 -167.0(6) . . . . ?
C7 N1 C8 C9 179.0(7) . . . . ?
V1 N1 C8 C9 10.1(7) . . . . ?
V1 O2 C9 C10 164.4(6) . . . . ?
V1 O2 C9 C8 -16.1(9) . . . . ?
C13 C8 C9 O2 179.4(7) . . . . ?
N1 C8 C9 O2 2.1(9) . . . . ?
C13 C8 C9 C10 -1.1(11) . . . . ?
N1 C8 C9 C10 -178.4(7) . . . . ?
O2 C9 C10 C11 179.1(7) . . . . ?
C8 C9 C10 C11 -0.3(11) . . . . ?
C9 C10 C11 O3 176.7(7) . . . . ?
C9 C10 C11 C12 1.3(11) . . . . ?
C14 O3 C11 C10 -176.3(7) . . . . ?
C14 O3 C11 C12 -0.4(7) . . . . ?
C14 N2 C12 C13 176.9(8) . . . . ?
C14 N2 C12 C11 0.2(8) . . . . ?
C10 C11 C12 C13 -1.0(11) . . . . ?
O3 C11 C12 C13 -177.1(6) . . . . ?
C10 C11 C12 N2 176.2(7) . . . . ?
O3 C11 C12 N2 0.1(8) . . . . ?
N2 C12 C13 C8 -176.8(7) . . . . ?
C11 C12 C13 C8 -0.5(10) . . . . ?
N1 C8 C13 C12 178.3(7) . . . . ?
C9 C8 C13 C12 1.5(10) . . . . ?
C12 N2 C14 O3 -0.5(8) . . . . ?
C12 N2 C14 C15 179.6(7) . . . . ?
C11 O3 C14 N2 0.5(8) . . . . ?
C11 O3 C14 C15 -179.6(6) . . . . ?
N2 C14 C15 C20 2.3(12) . . . . ?
O3 C14 C15 C20 -177.5(6) . . . . ?
N2 C14 C15 C16 -174.9(7) . . . . ?
O3 C14 C15 C16 5.2(11) . . . . ?
C20 C15 C16 C17 1.9(11) . . . . ?
C14 C15 C16 C17 179.2(7) . . . . ?
C15 C16 C17 C18 0.0(13) . . . . ?
C16 C17 C18 C19 -2.3(14) . . . . ?
C17 C18 C19 C20 2.6(15) . . . . ?
C18 C19 C20 O4 -179.9(8) . . . . ?
C18 C19 C20 C15 -0.7(14) . . . . ?
C16 C15 C20 C19 -1.5(12) . . . . ?
C14 C15 C20 C19 -178.9(8) . . . . ?
C16 C15 C20 O4 177.7(7) . . . . ?
C14 C15 C20 O4 0.3(12) . . . . ?
C25 N3 C21 C22 170.1(13) . . . . ?
C23 N3 C21 C22 -59.1(15) . . . . ?
C25 N3 C23 C24 54.7(15) . . . . ?
C21 N3 C23 C24 -68.4(12) . . . . ?
C23 N3 C25 C26 79.1(18) . . . . ?
C21 N3 C25 C26 -154.2(16) . . . . ?

loop_
_geom_hbond_atom_site_label_D
_geom_hbond_atom_site_label_H
_geom_hbond_atom_site_label_A
_geom_hbond_site_symmetry_D
_geom_hbond_site_symmetry_H
_geom_hbond_site_symmetry_A
_geom_hbond_distance_DA
_geom_hbond_distance_DH
_geom_hbond_distance_HA
_geom_hbond_angle_DHA
_geom_hbond_publ_flag
O4 H12 N2 . . . 2.663(9) 0.771 1.976 148.2 no
N3 H28 O5 . . 1_545 2.907(9) 0.980 1.982 156.4 no
N3 H28 O6 . . 1_545 2.982(9) 0.980 2.275 128.1 no

#==============================================================================
# Additional structures and associated data_? identifiers
# should be added at this point if there is more than one 
# structure analysis in the CIF.

_shelx_res_file
;
TITL (HNEt3)[VO2(L5-H)]
    shelxl.res
    created by SHELXL-2016/6 at 19:31:32 on 01-Jul-2021
CELL  0.71069 11.97810 7.58800 28.04160 90.00000 101.70460 90.00000
ZERR  4 0.00250 0.00140 0.00510 0.00000 0.01830 0.00000
LATT 1
SYMM .50-X, .50+Y, .50-Z
SFAC C H N O V
UNIT 104 112 12 24 4
OMIT   -1   2   3
OMIT   -1   2   2
OMIT   -1   0   5
OMIT   -5   0   3
OMIT    2   2   0
OMIT    0   1   2
OMIT   -1   1   2
OMIT    3   0   3
OMIT   -1   2   4
OMIT    2   1   2
OMIT    2   1   0
OMIT    2   2   0
OMIT   -1   1   4
OMIT   -1   1   5
OMIT   -2   1   3
OMIT    2   3   2
OMIT    2   1   3
OMIT   -1   0  15
OMIT    0   2   0
OMIT   -3   0  13
OMIT   -2   2   4
OMIT   -2   0   2
OMIT    2   1   0
OMIT    5   0   1
OMIT   -3   3  11
OMIT   -5   0   5
OMIT    3   2   1
OMIT    0   2   1
OMIT   -1   1   3
OMIT   -3   0   3
OMIT    0   2   4
OMIT    1   1   1
OMIT    2   0   0
OMIT    2   0   0
OMIT   -2   2   9
L.S. 20
FMAP 2
PLAN 50
WPDB -2
HTAB
BOND $H
CONF
LIST 4
TEMP 28.0
ACTA
DELU
SIZE 0.200 0.100 0.400
WGHT    0.163300
FVAR       0.25633
V1    5    0.828366    0.903901    0.392054    11.00000    0.04347    0.04753 =
         0.04969    0.00725    0.00061    0.00203
O1    4    0.968530    0.903425    0.371417    11.00000    0.04998    0.06218 =
         0.05833    0.00515   -0.00168    0.00046
O2    4    0.725774    0.746053    0.416531    11.00000    0.04658    0.06111 =
         0.05132    0.01084   -0.00435   -0.01475
O3    4    0.647419    0.468551    0.560851    11.00000    0.04815    0.05112 =
         0.05727    0.00375    0.00160    0.00104
O4    4    0.875166    0.384939    0.694445    11.00000    0.07589    0.10168 =
         0.04901    0.00438   -0.00557   -0.01544
H12   2    0.886632    0.403751    0.668835    11.00000    0.04749
O5    4    0.748136    0.912388    0.337083    11.00000    0.05178    0.08137 =
         0.04392    0.00960    0.00532   -0.00758
O6    4    0.819497    1.098403    0.415703    11.00000    0.06500    0.04741 =
         0.07542    0.00521    0.00912    0.00576
N1    3    0.934730    0.782721    0.457280    11.00000    0.04289    0.03697 =
         0.05238   -0.00190    0.00635    0.00438
N2    3    0.828097    0.489070    0.601833    11.00000    0.05471    0.04075 =
         0.05125    0.00183    0.00591    0.00140
N3    3    0.686863    0.283421    0.328566    11.00000    0.09031    0.05128 =
         0.07958    0.01595    0.02303    0.04059
AFIX  13
H28   2    0.715372    0.167533    0.340823    11.00000   -1.20000
AFIX   0
C1    1    1.074606    0.941744    0.394888    11.00000    0.04568    0.03850 =
         0.06548   -0.00361    0.01292    0.00184
C2    1    1.147997    1.019031    0.368995    11.00000    0.05880    0.05616 =
         0.06439    0.00407    0.00389   -0.00261
AFIX  43
H1    2    1.122474    1.046860    0.336300    11.00000   -1.20000
AFIX   0
C3    1    1.259402    1.055278    0.391490    11.00000    0.05728    0.05905 =
         0.07935   -0.00248    0.02313   -0.00015
AFIX  43
H2    2    1.307929    1.109860    0.374020    11.00000   -1.20000
AFIX   0
C4    1    1.298924    1.011124    0.439543    11.00000    0.04192    0.06131 =
         0.08155   -0.01367    0.00981   -0.00774
AFIX  43
H3    2    1.374016    1.035604    0.454388    11.00000   -1.20000
AFIX   0
C5    1    1.228103    0.931442    0.465471    11.00000    0.04831    0.04798 =
         0.05340   -0.01069    0.00341    0.00128
AFIX  43
H4    2    1.255548    0.900138    0.497789    11.00000   -1.20000
AFIX   0
C6    1    1.112953    0.896134    0.443416    11.00000    0.04352    0.03429 =
         0.04848   -0.01017    0.01251    0.00472
C7    1    1.043104    0.812921    0.472169    11.00000    0.04950    0.03739 =
         0.05126    0.00154   -0.00004    0.00190
AFIX  43
H5    2    1.077001    0.777936    0.503554    11.00000   -1.20000
AFIX   0
C8    1    0.868666    0.695558    0.486255    11.00000    0.03974    0.03724 =
         0.04901   -0.00260    0.00899    0.00518
C9    1    0.752161    0.682860    0.461276    11.00000    0.04693    0.04637 =
         0.05036   -0.00062   -0.00163   -0.00272
C10   1    0.670682    0.604305    0.484093    11.00000    0.04097    0.05518 =
         0.05511    0.00149    0.00446   -0.00235
AFIX  43
H6    2    0.594423    0.594876    0.468768    11.00000   -1.20000
AFIX   0
C11   1    0.710027    0.542916    0.529915    11.00000    0.04403    0.03827 =
         0.05486   -0.00435    0.00602    0.00313
C12   1    0.823569    0.556877    0.555084    11.00000    0.04400    0.03525 =
         0.04865   -0.00816    0.00188    0.00796
C13   1    0.903880    0.633405    0.533901    11.00000    0.03986    0.03810 =
         0.05104   -0.00273    0.00091    0.00604
AFIX  43
H7    2    0.979180    0.644017    0.550411    11.00000   -1.20000
AFIX   0
C14   1    0.724855    0.438516    0.603787    11.00000    0.04957    0.04403 =
         0.04256   -0.00597    0.01079    0.01209
C15   1    0.686495    0.359916    0.643789    11.00000    0.05679    0.03449 =
         0.05578   -0.00083    0.01168    0.00031
C16   1    0.574008    0.298485    0.640058    11.00000    0.05800    0.04277 =
         0.05834    0.00475    0.01557    0.00966
AFIX  43
H8    2    0.522186    0.310434    0.610675    11.00000   -1.20000
AFIX   0
C17   1    0.539661    0.222028    0.678576    11.00000    0.06150    0.05601 =
         0.07704    0.01316    0.01995    0.01088
AFIX  43
H9    2    0.465027    0.182400    0.675335    11.00000   -1.20000
AFIX   0
C18   1    0.615203    0.203334    0.722269    11.00000    0.08876    0.08010 =
         0.06548    0.02599    0.02631    0.00353
AFIX  43
H10   2    0.591057    0.154885    0.748917    11.00000   -1.20000
AFIX   0
C19   1    0.729315    0.257756    0.726584    11.00000    0.08870    0.08078 =
         0.04893    0.01152    0.00304    0.00741
AFIX  43
H11   2    0.781569    0.241058    0.755643    11.00000   -1.20000
AFIX   0
C20   1    0.762362    0.334750    0.687986    11.00000    0.06593    0.04799 =
         0.05256   -0.00035    0.01401    0.00149
C21   1    0.793253    0.411103    0.336768    11.00000    0.18126    0.04505 =
         0.13044    0.00334   -0.02879   -0.01868
AFIX  23
H13   2    0.768596    0.526988    0.324294    11.00000   -1.20000
H14   2    0.823442    0.422413    0.371442    11.00000   -1.20000
AFIX   0
C22   1    0.881137    0.351215    0.313676    11.00000    0.09026    0.18957 =
         0.36338    0.11522    0.03375   -0.02736
AFIX  33
H15   2    0.943453    0.433197    0.319780    11.00000   -1.20000
H16   2    0.907156    0.237654    0.326385    11.00000   -1.20000
H17   2    0.852302    0.342245    0.279230    11.00000   -1.20000
AFIX   0
C23   1    0.635477    0.260251    0.276714    11.00000    0.08757    0.07729 =
         0.10796   -0.01925    0.00561    0.00466
AFIX  23
H18   2    0.580080    0.165546    0.273626    11.00000   -1.20000
H19   2    0.694632    0.224143    0.259729    11.00000   -1.20000
AFIX   0
C24   1    0.578179    0.419864    0.252295    11.00000    0.12790    0.13050 =
         0.07508    0.00608   -0.02190    0.02445
AFIX  33
H20   2    0.547097    0.393662    0.218735    11.00000   -1.20000
H21   2    0.517871    0.455082    0.268161    11.00000   -1.20000
H22   2    0.632619    0.513780    0.254240    11.00000   -1.20000
AFIX   0
C25   1    0.619044    0.345493    0.360149    11.00000    0.22956    0.11969 =
         0.14916    0.05739    0.10852    0.09083
AFIX  23
H23   2    0.670047    0.395401    0.388214    11.00000   -1.20000
H24   2    0.573844    0.442081    0.343742    11.00000   -1.20000
AFIX   0
C26   1    0.545030    0.233927    0.377656    11.00000    0.07234    0.10003 =
         0.40178   -0.06639    0.12346   -0.01718
AFIX  33
H25   2    0.505762    0.298615    0.398663    11.00000   -1.20000
H26   2    0.490608    0.186431    0.350834    11.00000   -1.20000
H27   2    0.587447    0.139442    0.395600    11.00000   -1.20000
AFIX   0
HKLF 4


REM  (HNEt3)[VO2(L5-H)]
REM R1 =  0.0790 for    1828 Fo > 4sig(Fo)  and  0.2748 for all    5478 data
REM    329 parameters refined using    101 restraints

END

WGHT      0.1684      0.0000

REM Instructions for potential hydrogen bonds
HTAB O4 N2
EQIV $1 x, y-1, z
HTAB N3 O5_$1
HTAB N3 O6_$1
EQIV $2 -x+2, -y+2, -z+1
HTAB C7 O6_$2
EQIV $3 -x+3/2, y-1/2, -z+1/2
HTAB C24 O1_$3

REM Highest difference peak  0.639,  deepest hole -0.603,  1-sigma level  0.103
Q1    1   0.7270  0.4127  0.3531  11.00000  0.05    0.64
Q2    1   0.8295  0.9104  0.3559  11.00000  0.05    0.59
Q3    1   0.8017  0.9047  0.4302  11.00000  0.05    0.56
Q4    1   0.5469  0.2584  0.3373  11.00000  0.05    0.50
Q5    1   1.1028  0.9256  0.5271  11.00000  0.05    0.39
Q6    1   0.7365  0.9128  0.4070  11.00000  0.05    0.38
Q7    1   0.7984  0.8205  0.3219  11.00000  0.05    0.37
Q8    1   0.9619  0.9045  0.3959  11.00000  0.05    0.35
Q9    1   0.5369  0.2827  0.4079  11.00000  0.05    0.34
Q10   1   0.9991  0.6118  0.4137  11.00000  0.05    0.33
Q11   1   0.4060  0.0472  0.3279  11.00000  0.05    0.33
Q12   1   0.7124  0.2267  0.3338  11.00000  0.05    0.32
Q13   1   0.7063  0.4029  0.7716  11.00000  0.05    0.32
Q14   1   0.8145  1.0583  0.4532  11.00000  0.05    0.32
Q15   1   0.8744  0.3531  0.7326  11.00000  0.05    0.31
Q16   1   0.8811  0.6320  0.3805  11.00000  0.05    0.31
Q17   1   0.9641  0.9231  0.4784  11.00000  0.05    0.31
Q18   1   0.9550  0.9936  0.3505  11.00000  0.05    0.30
Q19   1   0.8567  1.1895  0.3750  11.00000  0.05    0.30
Q20   1   0.8241  0.5286  0.5248  11.00000  0.05    0.30
Q21   1   0.8171  1.1752  0.4193  11.00000  0.05    0.30
Q22   1   0.7802  0.3750  0.2494  11.00000  0.05    0.30
Q23   1   0.9586  0.1616  0.3416  11.00000  0.05    0.30
Q24   1   0.7349  0.7776  0.3569  11.00000  0.05    0.29
Q25   1   0.9263  0.7756  0.4241  11.00000  0.05    0.29
Q26   1   0.5538  0.0603  0.3732  11.00000  0.05    0.29
Q27   1   0.5923  0.3867  0.1867  11.00000  0.05    0.29
Q28   1   0.6358  0.5602  0.3294  11.00000  0.05    0.29
Q29   1   0.9634  0.5520  0.4010  11.00000  0.05    0.29
Q30   1   0.4853  0.5211  0.4410  11.00000  0.05    0.29
Q31   1   0.6711  0.4611  0.5920  11.00000  0.05    0.28
Q32   1   0.6549  0.2917  0.3288  11.00000  0.05    0.28
Q33   1   1.0817  0.8838  0.3770  11.00000  0.05    0.28
Q34   1   0.5914  0.1811  0.2289  11.00000  0.05    0.28
Q35   1   0.4953  0.5155  0.2972  11.00000  0.05    0.27
Q36   1   0.8267  1.0851  0.3913  11.00000  0.05    0.27
Q37   1   0.3576  0.1062  0.6288  11.00000  0.05    0.27
Q38   1   1.2487  1.2515  0.3910  11.00000  0.05    0.27
Q39   1   0.6884  0.4310  0.6193  11.00000  0.05    0.27
Q40   1   0.8622  0.4252  0.3449  11.00000  0.05    0.27
Q41   1   1.0121  1.0103  0.3853  11.00000  0.05    0.26
Q42   1   0.4168  0.5083  0.2660  11.00000  0.05    0.26
Q43   1   0.7967  0.3099  0.6549  11.00000  0.05    0.26
Q44   1   1.1642  0.9021  0.4505  11.00000  0.05    0.26
Q45   1   0.7913  0.4118  0.7918  11.00000  0.05    0.26
Q46   1   0.7454  0.2194  0.8144  11.00000  0.05    0.25
Q47   1   0.9632  0.9237  0.3314  11.00000  0.05    0.25
Q48   1   0.5946  0.2099  0.3925  11.00000  0.05    0.25
Q49   1   0.6286  0.4572  0.5950  11.00000  0.05    0.25
Q50   1   1.3024  1.0637  0.3681  11.00000  0.05    0.25
;

_shelx_res_checksum   76607

_shelx_hkl_file
;
  -1   0  -2   -0.79    1.18
   1   0  -3  108.10    6.89
   0   1   0    0.45    1.16
   0   1  -1   46.85    2.47
   0   0  -4 1501.30   13.70
   0   1  -2 1148.18   11.80
  -1   0  -3  235.64    5.90
   1   0  -4    1.25    1.32
   1   1   0  903.15   10.47
  -1   1   0  929.88   10.56
   1   1  -1    9.13    0.86
  -1   1  -1  355.40    6.99
   1   1  -2 1126.45   13.73
   2   0  -1    0.94    0.64
  -2   0   0 3661.84   21.63
   2   0   0 3660.78   21.84
   0   1  -3  111.60    4.27
   2   0  -2   31.57    2.53
  -1   1  -2  210.96    6.18
   1   1  -3  302.20   11.85
  -2   0  -1    0.23    1.67
   0   0  -5   -1.03    1.70
   2   0  -3    1.51    1.58
  -1   0  -4    1.31    1.49
   1   0  -5  789.76   16.58
   0   1  -4  198.42    6.29
  -2   0  -2  654.19   10.03
   2   0  -4  485.68   10.87
  -1   1  -3 2226.78   20.42
   1   1  -4   27.77    2.30
   2   1  -1  395.40    9.06
   2   1   0 1253.95   14.61
  -2   1   0 1299.08   14.72
   2   1  -2    2.42    1.99
  -1   0  -5  173.80    6.41
   1   0  -6    1.56    1.84
   0   0  -6   58.79    3.71
  -2   0  -3    0.79    2.18
   2   0  -5    0.17    1.50
  -2   1  -1  122.76    5.05
   0   1  -5 1333.22   18.18
   2   1  -3   38.66    2.53
  -1   1  -4  574.85   11.81
   1   1  -5  477.67   15.62
  -2   1  -2  249.33    7.05
   2   1  -4    1.33    2.36
  -2   0  -4   40.34    3.52
   2   0  -6   -1.04    2.08
  -1   0  -6   -1.70    2.03
   3   0  -1  145.42    5.69
   3   0  -2    0.29    2.14
   1   0  -7  128.37    6.20
  -1   1  -5  266.42    8.48
   1   1  -6  483.03   11.94
   0   0  -7    2.93    1.99
   0   1  -6  152.42    6.48
   3   0   0    1.90    1.47
  -3   0   0    1.36    1.01
  -2   1  -3   30.33    2.25
   3   0  -3   99.25    5.06
   2   1  -5  215.96    7.39
   0   2   0   20.82    1.70
  -3   0  -1  111.11    5.16
   0   2  -1  495.29   10.38
   3   0  -4   -0.23    2.31
   0   2  -2  602.09   11.72
  -2   0  -5    2.58    2.17
   2   0  -7    1.83    2.00
   1   2  -1   -0.39    2.30
  -1   2   0  822.03   13.52
   1   2   0  814.93   13.57
  -2   1  -4  130.30    6.27
  -3   0  -2    1.02    2.14
   2   1  -6   10.94    1.33
  -1   2  -1  314.31    8.58
   1   2  -2 3396.65   28.69
   3   0  -5  898.74   16.13
  -1   1  -6   15.09    1.44
   3   1  -1   77.28    4.69
   3   1  -2  351.32   10.31
   1   1  -7  178.83    7.99
  -1   0  -7  125.24    6.48
   0   2  -3  170.29    6.89
   1   0  -8   -1.12    2.11
   0   1  -7    6.64    1.12
   3   1   0  258.31    7.85
  -3   1   0  281.87    8.01
   3   1  -3   71.01    5.01
  -1   2  -2  108.75    5.43
   0   0  -8   47.94    3.88
   1   2  -3 5190.79   36.66
  -3   1  -1  256.83    7.92
  -3   0  -3  858.35   14.10
   3   1  -4  271.03    9.08
   3   0  -6    2.35    2.14
   0   2  -4  718.04   13.70
  -2   0  -6  492.56   12.12
  -2   1  -5    1.88    2.32
  -1   2  -3    1.57    2.34
   1   2  -4 3925.07   34.85
   2   1  -7  -54.39   10.84
   2   0  -8    1.84    2.45
  -3   1  -2   58.60    4.52
   3   1  -5    2.90    1.00
   2   2  -1  126.84    6.18
  -1   1  -7    2.03    1.05
  -2   2   0  830.28   14.53
   2   2   0  776.37   14.35
   2   2  -2  290.07    9.28
   1   1  -8   -0.37    2.21
  -3   0  -4    1.88    2.18
   0   1  -8    3.00    2.08
  -1   0  -8   -1.18    2.25
  -2   2  -1    1.22    2.25
   0   2  -5    2.84    2.25
   2   2  -3  539.29   13.28
  -1   2  -4  572.74   13.30
   1   0  -9    8.75    1.23
   1   2  -5  911.82   19.54
   3   0  -7   98.98    9.59
  -3   1  -3  356.49    9.81
   0   0  -9   -0.81    1.91
   3   1  -6  209.55    8.30
  -2   2  -2  419.66   11.00
  -2   1  -6    5.56    1.09
   2   2  -4  311.10   10.90
   2   1  -8   76.71    5.92
   4   0  -2  244.59    8.34
  -2   0  -7   -3.23    2.35
   4   0  -1    2.14    1.52
   4   0  -3   -0.01    2.32
   2   0  -9   -0.70    2.03
   4   0   0   49.08    4.44
  -1   2  -5   33.37    2.92
  -4   0   0   53.76    4.39
   1   2  -6  117.36    7.46
   0   2  -6  388.61   10.99
   4   0  -4  935.60   16.69
  -3   0  -5  134.79    6.37
  -2   2  -3  216.95    8.24
   2   2  -5   17.72    1.84
  -3   1  -4   63.65    4.59
  -1   1  -8 1214.48   21.22
   3   0  -8    1.80    1.67
   1   1  -9   22.69    2.01
   3   1  -7   24.53    2.37
  -4   0  -1    1.32    0.94
   4   0  -5    1.30    1.30
   0   1  -9  325.30   10.70
  -1   0  -9  133.85    7.23
   1   0 -10    1.21    2.22
   4   1  -2   20.64    1.97
  -2   1  -7  301.27   10.89
  -2   2  -4   23.57    2.15
   4   1  -1    4.68    1.02
   4   1  -3  530.69   13.83
   2   2  -6    9.98    1.69
   2   1  -9   83.46    5.49
  -4   0  -2  260.33    9.07
  -1   2  -6    2.45    2.38
   3   2  -1   31.73    2.65
   3   2  -2   86.80    5.88
   0   0 -10    1.60    2.11
   1   2  -7   19.06    1.83
   4   1   0   50.90    4.14
  -4   1   0   53.13    4.56
   4   0  -6  371.21   11.73
  -2   0  -8  276.23   10.10
   0   2  -7   10.25    1.27
   4   1  -4   36.65    3.04
  -3   1  -5  200.72    8.47
  -3   2   0   61.10    4.73
   3   2   0   59.17    4.74
   3   2  -3  330.43   12.10
  -3   0  -6   -0.10    2.20
   2   0 -10   48.33    4.47
   3   1  -8   39.56    3.16
   3   0  -9    0.40    2.77
  -3   2  -1   34.36    2.88
  -4   1  -1  249.47    8.78
   3   2  -4  240.60   10.18
   4   1  -5   62.48    5.39
  -4   0  -3   -5.56    2.53
  -1   1  -9  127.92    7.53
  -2   2  -5  182.86    8.48
   1   1 -10  124.91    6.83
   2   2  -7    1.70    2.48
   4   0  -7   -1.47    2.70
  -3   2  -2  128.21    6.82
  -4   1  -2  129.71    6.77
   3   2  -5  119.68    7.88
   0   1 -10  198.75    8.65
  -1   2  -7  123.10    7.47
   4   1  -6   34.53    3.25
  -2   1  -8  707.35   17.43
   1   2  -8    3.01    1.19
  -1   0 -10   -0.96    2.55
  -3   1  -6    6.59    1.33
   2   1 -10   51.87    4.56
   1   0 -11   -2.78    2.75
   0   2  -8   21.21    1.92
   0   3   0    0.24    2.22
   3   1  -9   83.75    6.57
  -3   0  -7  211.78    9.25
   0   3  -1   -0.92    2.83
  -4   0  -4  109.77    6.18
  -3   2  -3    4.99    1.21
  -2   0  -9   -1.24    2.82
   3   2  -6   46.56    3.92
   3   0 -10    1.17    2.44
   0   0 -11   -0.36    2.21
  -4   1  -3  410.73   11.54
   4   0  -8  173.53   10.58
  -2   2  -6   24.86    2.20
   0   3  -2  291.90   10.25
   2   0 -11    1.83    1.02
   2   2  -8    6.80    5.00
   4   1  -7  432.65   13.83
   1   3  -1   67.18    5.75
  -1   3   0   -0.80    2.95
   1   3   0   -2.38    2.52
  -1   3  -1  172.59    7.96
   1   3  -2  128.26    7.11
   0   3  -3   85.81    5.89
  -1   1 -10    4.88    1.20
  -3   2  -4    5.90    1.25
  -1   3  -2    6.64    1.28
   1   1 -11   36.87    3.15
  -1   2  -8  195.20    9.22
   1   3  -3  126.93    7.17
   1   2  -9  179.43    9.95
   3   2  -7    2.77    3.72
  -3   1  -7   20.30    1.85
   5   0  -2   -1.17    2.50
  -4   0  -5   -1.25    2.79
   5   0  -3   16.63    1.63
  -4   1  -4    2.71    1.16
  -2   1  -9   19.86    1.92
   5   0  -1   84.60    6.12
   0   2  -9  253.64   11.03
   0   3  -4   38.37    3.15
   3   1 -10   -2.43    2.44
   5   0  -4   -3.30    2.80
   0   1 -11   -2.51    2.77
   4   1  -8   48.64    3.77
   4   0  -9    1.92    2.43
  -1   3  -3  110.19    6.80
   2   1 -11   87.76    6.04
   1   3  -4  268.35   10.28
  -3   0  -8    1.44    2.32
   4   2  -2  304.87   11.63
  -2   2  -7   -1.16    2.67
  -1   0 -11   60.18    4.13
   5   0   0   -1.68    2.46
  -5   0   0   -4.20    2.09
   4   2  -1   18.24    1.80
   4   2  -3   14.55    1.66
   1   0 -12    1.01    2.55
   5   0  -5  296.94   11.22
   2   2  -9   98.64    9.46
   3   0 -11    6.10   11.64
   2   3  -1  131.76    7.41
   2   3   0   80.56    5.90
  -2   3   0   70.49    5.88
   4   2   0   49.28    3.60
  -4   2   0   62.85    5.57
   2   3  -2   28.43    2.51
   4   2  -4    5.59    1.30
  -2   0 -10  152.39    8.56
  -3   2  -5   -0.23    2.64
  -2   3  -1   -1.38    2.51
  -5   0  -1   47.93    4.58
   3   2  -8   -0.01    3.02
   0   3  -5  122.31    7.34
   2   3  -3    3.43    2.53
   2   0 -12  206.81   10.74
  -1   3  -4    4.26    1.21
   1   3  -5  126.46    7.61
   0   0 -12  112.19    7.81
   5   0  -6    2.30    2.40
   5   1  -2   50.73    4.93
  -4   2  -1   48.53    3.43
   5   1  -3    2.03    2.69
  -4   1  -5  105.62    6.72
   4   2  -5   67.41    6.61
   5   1  -1    8.89    1.44
  -4   0  -6    5.98    1.27
   5   1  -4  370.75   12.96
  -1   2  -9   53.00    4.36
   4   1  -9  103.30    7.34
  -2   3  -2   19.82    1.79
   2   3  -4  401.28   13.31
   1   2 -10   23.77    2.21
  -3   1  -8  135.05    8.42
   4   0 -10   73.83    7.26
  -1   1 -11  219.92   10.39
  -5   1   0  144.06    7.36
   5   1   0  129.36    7.27
  -5   0  -2   -3.19    2.68
   1   1 -12   58.21    5.13
   5   1  -5   68.86    6.23
  -4   2  -2  145.26    7.50
   3   1 -11    6.98    5.05
   0   2 -10    4.98    1.36
   5   0  -7  132.82    8.15
  -1   3  -5   48.68    3.64
   4   2  -6   12.83    1.62
  -2   2  -8   13.89    1.75
   1   3  -6   97.34    7.68
   0   3  -6  374.96   12.61
  -2   1 -10   58.09    4.19
  -2   3  -3    9.80    1.37
  -3   2  -6   27.61    2.44
   2   3  -5  122.04    8.68
   2   2 -10   39.65    3.42
  -3   0  -9  509.44   15.32
  -5   1  -1   -0.92    2.73
   2   1 -12   26.88    2.39
   0   1 -12  140.13    8.43
   3   2  -9    8.15    7.66
   5   1  -6    8.64    1.57
   3   0 -12   -0.97    2.62
  -4   1  -6   24.19    2.12
  -5   0  -3   50.06    3.60
  -4   2  -3   52.96    3.76
  -1   0 -12    2.58    3.40
   1   0 -13   -3.75    2.96
   4   2  -7  279.93   12.71
   4   1 -10   14.15    1.70
   5   0  -8   -3.59    3.07
  -4   0  -7    2.54    2.47
  -2   3  -4   63.46    5.78
  -5   1  -2  167.21    8.35
  -2   0 -11   -3.91    3.17
   2   3  -6   57.33    4.96
  -1   3  -6   62.40    5.38
   3   3  -1    0.70    2.81
   3   3  -2    4.79    3.27
   1   3  -7  624.23   17.48
   5   1  -7  103.03    8.12
   2   0 -13   -2.08    2.96
   4   0 -11    0.89    2.91
   0   3  -7  140.21    8.56
  -3   3   0    2.25    2.66
   3   3   0    3.18    2.98
  -1   2 -10  462.20   16.10
   3   3  -3   37.15    2.96
   1   2 -11   -0.71    2.74
   0   0 -13   -1.67    3.42
  -3   1  -9   24.15    2.27
  -3   2  -7   44.04    3.52
  -3   3  -1    4.81    1.31
  -4   2  -4  119.24    7.36
   3   3  -4  315.91   12.55
  -5   0  -4    2.95    2.38
   3   1 -12    8.77    1.58
  -2   2  -9  333.44   13.17
  -5   1  -3    1.09    3.03
   3   2 -10   -2.76    3.57
   0   2 -11    9.57    1.55
   4   2  -8   84.17    7.19
  -1   1 -12  212.75   10.53
  -2   3  -5   64.53    6.23
   2   2 -11   47.68    3.61
   5   0  -9  294.68   13.01
   1   1 -13  131.28    7.61
   2   3  -7    5.95    1.53
   5   1  -8  560.00   17.87
  -4   1  -7  167.62    9.27
  -3   3  -2    0.34    2.70
  -2   1 -11  239.27   11.53
  -3   0 -10   -6.06    3.28
   3   3  -5   -0.43    3.67
  -1   3  -7   34.87    2.89
   2   1 -13   67.78    5.97
   1   3  -8   10.37    1.71
   4   1 -11  126.64    9.09
   3   0 -13   56.59    5.93
   0   3  -8   59.03    5.41
  -4   0  -8  236.89   10.55
   0   1 -13   26.34    2.23
   5   2  -2  153.43    9.22
  -4   2  -5   13.60    1.60
   5   2  -3  127.97    8.72
  -3   3  -3   46.07    3.90
  -5   1  -4  158.92    8.73
   5   2  -1  185.53    9.40
  -5   0  -5  311.27   11.41
   4   0 -12    3.02    3.30
   3   3  -6    4.78    1.50
   5   2  -4   66.19    4.88
   4   2  -9  280.99   12.10
  -1   0 -13 1970.78   32.93
  -2   3  -6  185.67    9.89
   1   0 -14    0.31    2.41
   5   1  -9  352.00   14.31
  -3   2  -8   10.43    1.53
   2   3  -8  350.48   17.07
  -2   0 -12   62.24    4.64
   6   0  -3   -0.56    3.03
   5   2   0   16.76    1.84
  -1   2 -11   13.35    1.91
  -5   2   0   19.37    1.77
   5   0 -10   -0.56    3.04
   6   0  -2  324.64   12.23
   6   0  -4  366.90   12.98
   1   2 -12    3.19    2.91
   5   2  -5   37.53    3.07
  -3   1 -10   53.30    4.38
   2   0 -14   78.57    7.76
   3   2 -11    2.63    2.80
   6   0  -1   -5.29    3.20
  -2   2 -10   90.48    7.62
   6   0  -5   -0.18    3.10
   3   1 -13   25.07    2.28
  -3   3  -4   39.71    3.54
  -1   3  -8   47.32    4.17
  -5   2  -1   -1.77    3.16
  -4   1  -8    2.80    3.26
   2   2 -12   42.00    4.10
   1   3  -9  246.91   12.55
   0   0 -14  704.12   19.14
   3   3  -7   80.68    6.34
   0   2 -12   24.53    2.26
   5   2  -6  207.25   11.78
  -6   0   0   16.36    1.61
   6   0   0   10.99    1.69
  -4   2  -6  106.51    8.24
   0   3  -9   11.67    1.64
  -5   1  -5   48.33    3.75
   6   0  -6  252.43   11.27
   4   1 -12    2.49    2.40
  -1   1 -13   43.01    3.69
   1   1 -14    3.72    1.30
  -5   0  -6    1.81    2.38
  -3   0 -11  746.49   20.64
  -2   1 -12   86.06    7.97
  -2   3  -7    3.02    2.90
   4   3  -2    2.61    2.70
   6   1  -3   11.50    1.70
   4   2 -10  123.29    8.76
   5   1 -10  174.63   11.11
  -5   2  -2   32.04    2.72
  -4   0  -9   -2.42    2.72
   4   3  -1   -1.05    3.14
   6   1  -2   18.87    1.77
   4   3  -3    3.05    1.53
   6   1  -4  166.49    9.42
   2   3  -9   40.55    3.66
  -6   0  -1    1.24    2.46
   2   1 -14    4.47    3.47
   5   2  -7   71.38    6.97
  -4   3   0   84.39    7.03
   3   0 -14    0.50    2.88
   6   1  -1    4.26    3.40
   4   3   0   96.87    7.06
   5   0 -11  471.23   21.32
  -3   3  -5   20.95    1.99
   6   0  -7   -1.05    3.35
   4   3  -4  475.05   17.45
   6   1  -5   57.33    4.26
   4   0 -13    2.80    2.18
  -3   2  -9   94.24    7.42
   3   3  -8    2.91    1.45
   0   1 -14    4.29    3.23
   0   4   0   30.28    2.60
   6   1   0    9.83    1.55
  -6   1   0    9.59    1.58
  -4   3  -1   -5.25    2.57
   0   4  -1   46.30    3.66
   4   3  -5   72.93    5.52
   3   2 -12   -2.44    3.57
   6   1  -6  280.43   12.51
  -6   0  -2   38.01    3.50
  -5   2  -3   36.69    3.00
  -1   3  -9   81.84    7.36
  -1   2 -12   13.04    1.78
   0   4  -2   -1.51    2.79
   1   3 -10   27.24    2.52
   1   2 -13    4.35    3.09
  -5   1  -6   17.31    1.70
  -1   0 -14   17.32    2.81
  -3   1 -11   76.34    7.22
   1   4  -1  375.90   13.80
  -1   4   0  101.22    7.60
   1   4   0  104.54    7.66
   5   2  -8    0.59    3.86
   6   0  -8   41.16    4.07
  -4   2  -7   39.97    3.84
  -2   0 -13    0.71    3.05
  -4   1  -9  453.38   15.75
   1   0 -15   43.08    3.75
  -2   2 -11  141.32    9.90
  -1   4  -1    1.56    3.48
  -6   1  -1   10.67    1.56
  -4   3  -2   94.45    7.33
   1   4  -2   59.07    4.50
   0   3 -10   36.12    3.14
   2   0 -15    3.96    2.67
   0   4  -3   54.94    3.99
   3   1 -14   16.88    1.85
   2   2 -13   80.99    7.84
   4   3  -6  264.17   14.19
   5   1 -11  173.11   11.10
  -2   3  -8   15.98    1.79
  -5   0  -7  130.86    8.00
   4   2 -11    1.34    3.04
   6   1  -7    9.99    1.79
  -3   3  -6   49.09    4.23
   4   1 -13   11.93    3.33
  -1   4  -2   42.96    3.49
   2   3 -10    1.36    3.24
   1   4  -3   17.54    1.90
   0   2 -13   20.47    2.03
   3   3  -9   -0.01    3.96
  -6   0  -3    3.34    2.52
   5   0 -12   -1.29    3.58
  -5   2  -4   -0.32    2.71
   0   0 -15    5.81    4.41
  -4   0 -10    1.95    2.77
   0   4  -4   67.29    6.53
  -6   1  -2  131.37    8.61
  -4   3  -3    3.85    3.42
  -1   4  -3  434.48   14.86
   6   0  -9    0.55    3.25
   1   4  -4  132.12    8.95
  -3   0 -12    0.34    3.31
   5   2  -9   -0.50    3.29
  -1   1 -14    5.36    3.79
   4   3  -7  103.41   10.31
  -2   1 -13  158.46   10.38
   6   1  -8    4.32    3.31
   1   1 -15    0.29    2.69
  -3   2 -10   47.08    4.33
   2   4  -1   51.31    4.01
   4   0 -14   19.91   14.28
  -2   4   0   -0.31    3.95
   2   4   0   11.95    1.82
   2   4  -2  125.71    8.62
   3   0 -15    3.20    1.53
   2   1 -15    3.42    2.83
  -5   1  -7   79.76    6.72
  -1   3 -10   11.49    1.73
   3   2 -13   14.55    2.22
   1   3 -11  117.61    9.02
  -2   4  -1    3.44    3.07
  -4   2  -8   15.09    1.74
   0   4  -5   24.59    2.20
   2   4  -3   19.71    1.97
  -1   4  -4   94.34    7.66
   1   4  -5    0.52    3.69
  -6   0  -4  153.53    8.99
  -3   3  -7  191.67   10.96
  -6   1  -3  211.88   10.24
  -4   3  -4  152.10    9.34
   5   1 -12  182.27   10.60
  -2   3  -9   22.84    2.20
  -5   2  -5   -2.92    2.61
   0   1 -15   37.24    3.00
   4   2 -12   12.36    2.25
   3   3 -10    2.27    4.34
  -4   1 -10   64.89    4.54
   0   3 -11    0.05    2.62
  -5   0  -8   -1.64    2.95
   4   3  -8  138.29   11.67
  -2   4  -2   74.60    6.75
  -1   2 -13    1.54    2.60
   2   4  -4    7.58    1.74
   2   3 -11    3.93    2.93
   6   1  -9   49.75    4.35
   6   0 -10  275.40   13.50
  -3   1 -12    2.52    2.19
   1   2 -14    8.90    1.64
  -2   2 -12   37.52    3.43
   6   2  -3    3.51    2.67
   5   2 -10  243.68   12.25
   6   2  -2  233.89   11.42
   6   2  -4    0.03    2.66
   4   1 -14    3.53    2.93
   2   2 -14   86.56    6.09
   5   0 -13  290.23   22.89
  -2   0 -14   56.15    5.08
  -1   0 -15  161.42   10.34
  -1   4  -5   -5.37    3.10
   3   1 -15  121.00    8.92
   6   2  -1    4.41    3.01
   1   4  -6    0.32    4.05
   0   4  -6   41.15    3.93
   6   2  -5   14.20    1.94
  -2   4  -3   46.20    4.04
   1   0 -16   -3.42    3.13
   2   4  -5   48.76    4.55
   2   0 -16   38.99    3.10
   0   2 -14   58.24    4.95
  -6   1  -4   53.13    4.17
  -4   3  -5    3.34    3.27
   5   3  -2   17.36    2.08
  -6   2   0  210.36   10.57
   5   3  -3  120.87    9.23
   6   2   0  198.84   10.23
  -4   0 -11    0.25    2.55
  -6   0  -5   -2.98    3.39
   5   3  -1   10.98    1.77
   6   2  -6  139.19    9.76
   5   3  -4    1.60    2.09
  -5   1  -8   28.02    2.79
   4   3  -9    5.15    1.75
   6   1 -10  107.00    9.07
  -5   2  -6   25.42    2.42
  -3   3  -8   18.09    2.17
  -3   2 -11    2.26    3.12
  -1   3 -11   -3.69    3.29
   5   3   0  142.36    9.42
  -5   3   0  128.03    8.64
  -2   4  -4   79.30    6.79
  -4   2  -9   72.63    5.24
  -3   0 -13  275.32   14.19
   6   0 -11   -0.62    3.30
   4   0 -15   -1.95    3.43
   1   3 -12    1.66    4.04
   0   0 -16   50.77    4.30
   5   3  -5   33.95    3.34
   2   4  -6  730.70   22.82
  -6   2  -1   33.57    2.98
  -1   4  -6   77.94    7.30
   3   4  -1  115.18    8.39
   3   3 -11   55.12    6.50
   3   4  -2   83.78    7.20
   1   4  -7  318.23   14.19
   5   1 -13    3.00    3.95
   7   0  -3   -2.88    3.16
  -2   1 -14   72.35    6.75
   7   0  -4   -2.20    3.33
   3   2 -14   12.01    2.10
  -1   1 -15  117.23    8.97
   5   2 -11    2.36    1.49
   0   4  -7   15.79    1.82
   6   2  -7  245.72   13.62
   3   4   0    0.96    3.07
  -3   4   0    2.27    2.91
  -2   3 -10    1.38    2.84
   7   0  -2    0.26    2.33
   3   4  -3   -0.15    3.36
   1   1 -16   25.30    2.53
   3   0 -16    2.98    2.02
   4   2 -13   18.78    5.05
   7   0  -5  105.84    8.09
   2   1 -16   20.33    1.93
  -5   0  -9   75.44    7.03
  -5   3  -1   22.52    2.00
   2   3 -12   19.32    2.65
   0   3 -12  161.78   10.92
   5   3  -6   -0.39    3.90
   7   0  -1  277.71   12.51
  -3   4  -1   47.95    4.13
   3   4  -4  459.17   17.35
  -4   1 -11   50.34    4.39
  -6   1  -5   95.48    7.52
  -4   3  -6   23.74    2.18
   7   0  -6   -2.45    2.99
  -6   2  -2   -3.31    3.14
  -2   4  -5   29.84    2.95
   5   0 -14   -3.84    3.39
   2   4  -7  861.46   27.19
  -1   2 -14  147.31   10.02
  -6   0  -6   15.34    1.87
   4   3 -10   54.83    4.44
  -2   2 -13  191.41   12.02
   6   2  -8    9.62    1.61
  -5   3  -2   12.73    1.72
   7   0   0   -3.69    3.32
  -3   1 -13   80.01    7.58
  -7   0   0   -7.04    3.39
  -3   4  -2  120.70    8.36
   4   1 -15   11.83    4.45
   1   2 -15    2.30    3.25
   6   1 -11   21.38    2.36
   0   1 -16    0.00    3.32
   3   4  -5   18.71    2.23
   7   1  -3   17.59    2.02
   5   3  -7   88.13    8.67
  -1   4  -7   37.00    3.19
   7   1  -4   66.49    5.32
   7   0  -7   83.50    5.66
   2   2 -15   27.45    2.57
   1   4  -8  211.68   11.97
  -5   2  -7   69.84    4.97
   7   1  -2  286.19   12.86
   6   0 -12    3.48    3.25
   3   1 -16   35.02    3.16
   7   1  -5    0.94    2.16
   0   4  -8   37.35    3.36
  -3   3  -9   47.17    4.37
  -5   1  -9   34.42    3.10
  -2   0 -15   -3.94    4.09
  -6   2  -3   84.66    7.47
   7   1  -1   19.89    1.93
  -7   0  -1    8.95    1.65
   5   2 -12    9.88    1.98
  -3   4  -3   -0.69    3.19
  -1   0 -16    2.56    3.43
   3   3 -12   -0.70    4.12
  -4   0 -12  177.33   11.61
   0   2 -15  171.93   11.62
   3   4  -6   63.17    5.38
   7   1  -6  154.80   11.17
  -4   2 -10   35.55    3.20
  -5   3  -3   -0.46    3.08
   1   0 -17   36.65    3.20
   2   0 -17   -2.11    2.84
  -1   3 -12    1.87    3.01
  -2   4  -6  135.61    9.75
   7   0  -8   -2.12    3.13
   6   2  -9   27.92    2.57
   5   1 -14    7.68    2.07
  -3   2 -12   91.53    8.59
   1   3 -13   44.05    4.39
   2   4  -8  174.17   12.32
  -6   1  -6   49.27    4.22
   5   3  -8   -0.23    3.52
  -4   3  -7   79.96    7.77
   7   1   0    2.52    1.37
  -7   1   0    0.23    3.01
  -2   3 -11   32.45    2.92
   4   0 -16   -1.90    3.30
   4   2 -14   -2.61    3.38
   2   3 -13    7.83    2.20
   7   1  -7    0.83    2.35
   3   2 -15  122.43    9.22
  -5   0 -10   -0.23    3.26
   4   3 -11    1.66    4.11
  -3   0 -14   -6.84    4.20
  -7   0  -2    0.94    2.95
   6   1 -12  146.35   10.66
  -6   0  -7   -4.95    3.19
  -3   4  -4   10.77    1.88
  -1   4  -8   10.58    1.74
   0   3 -13    1.19    3.14
   1   4  -9    1.85    1.83
   3   4  -7   70.81    6.20
  -2   1 -15   68.14    5.55
  -6   2  -4   27.63    2.55
   0   0 -17    1.67    2.92
  -7   1  -1   12.16    1.95
   7   0  -9   13.28    2.08
  -5   3  -4    6.08    1.72
  -1   1 -16   88.57    8.40
   3   0 -17   -2.88    3.53
  -4   1 -12    1.19    2.55
   0   4  -9   76.92    7.64
   5   0 -15   -1.44    3.87
   1   1 -17    3.32    1.36
  -5   2  -8   34.39    3.29
   2   1 -17   31.34    2.62
   6   0 -13    0.49    2.69
   7   1  -8  151.20   11.02
   6   2 -10    0.49    3.78
   5   3  -9  117.39   10.84
   4   4  -2  302.66   13.74
  -2   4  -7    1.92    3.37
   4   4  -1   40.82    3.65
   4   4  -3   62.98    5.28
   2   4  -9  207.59   13.48
  -3   3 -10   42.41    3.71
   4   1 -16   -2.19    3.74
   5   2 -13   35.90    3.28
  -2   2 -14   34.82    3.26
   4   4   0   27.79    2.31
  -1   2 -15   24.66    2.54
  -4   4   0   26.37    2.53
  -7   0  -3  286.85   12.95
  -5   1 -10   63.91    4.82
  -3   4  -5   94.19    7.78
   4   4  -4    4.88    3.62
  -3   1 -14  106.02    9.01
   1   2 -16  141.33   10.31
  -7   1  -2  207.79   10.90
   3   3 -13    1.59    5.78
  -6   1  -7   34.72    2.97
  -4   3  -8   67.70    5.07
   2   2 -16   -6.85    3.32
   3   4  -8    3.67    4.14
  -4   4  -1    2.43    2.88
   0   1 -17   42.12    4.13
   7   0 -10   -4.93    4.41
   7   1  -9  126.60   10.36
  -4   2 -11   81.97    6.01
   3   1 -17    4.03    1.60
   4   4  -5   -2.71    4.00
  -6   2  -5   69.04    5.05
  -5   3  -5   95.65    7.92
   4   3 -12   36.60    5.26
   5   1 -15   26.58    3.57
  -1   4  -9    3.25    1.64
  -1   3 -13   24.79    2.59
   6   1 -13  191.33   11.48
   1   4 -10   63.47    5.42
  -4   0 -13    4.42    3.34
   1   3 -14   31.33    2.93
  -2   3 -12  132.06   10.86
  -6   0  -8   59.45    4.79
   6   3  -3    4.72    4.47
   5   3 -10    3.73    4.20
   6   3  -2  110.82    9.37
  -3   2 -13    8.63    1.69
   4   2 -15    6.62    4.60
   6   2 -11  186.34   11.70
  -2   0 -16  163.24   12.29
   6   3  -4   18.71    2.26
   0   2 -16   32.70    3.14
  -4   4  -2  134.87    9.17
   2   3 -14    6.10    4.96
   0   4 -10   26.57    2.60
   7   2  -3   27.63    2.46
  -5   0 -11  307.16   13.97
   7   2  -4   50.70    4.76
   6   3  -1   21.55    2.19
   4   4  -6   89.66    6.41
  -2   4  -8   84.40    5.81
  -1   0 -17   20.03    2.21
  -7   1  -3    4.88    3.41
  -7   0  -4   -0.81    3.41
   7   2  -2   57.63    4.65
   2   0 -18   74.91    5.84
   6   3  -5   38.43    3.68
   4   0 -17    2.46    2.97
  -3   4  -6    0.41    3.89
   1   0 -18  -10.14    3.48
   3   2 -16   68.59    5.68
   2   4 -10    1.69    3.36
   7   2  -5    4.46    3.71
  -5   2  -9    2.92    3.56
   6   0 -14   29.20    3.33
   0   3 -14   32.21    2.90
   3   4  -9    2.94    3.86
  -6   3   0    1.88    3.77
   6   3   0   -1.61    3.83
   7   1 -10    8.92    1.80
   7   2  -1    3.51    2.75
   7   0 -11  350.97   16.55
   6   3  -6    1.21    3.36
   5   0 -16   -3.87    3.27
   7   2  -6   34.65    3.17
  -3   0 -15  123.86    9.86
  -4   4  -3    1.94    3.53
   5   2 -14  125.31    9.85
  -4   1 -13   94.33    8.73
  -5   3  -6   26.13    2.47
  -3   3 -11  140.38   10.54
   4   4  -7  122.79   10.46
  -6   2  -6   20.94    2.09
  -6   1  -8   34.07    3.26
  -7   2   0   43.57    4.06
  -4   3  -9   14.11    1.98
   7   2   0   41.24    3.66
  -2   1 -16   -0.09    3.94
  -6   3  -1   70.10    5.15
   3   0 -18    0.72    3.04
  -5   1 -11    1.97    3.27
   3   3 -14   -4.96    4.04
   7   2  -7    1.97    3.87
   5   3 -11  106.57    8.08
  -1   1 -17    9.64    1.97
   0   0 -18   62.96    5.16
  -7   1  -4  281.56   13.17
   6   3  -7    0.98    3.24
  -1   4 -10   39.18    3.45
   2   1 -18   27.51    2.65
   4   1 -17   42.31    3.90
   4   3 -13    1.72    3.99
   6   2 -12   -3.68    3.48
   1   1 -18   20.15    2.15
   1   4 -11   26.86    2.78
   6   1 -14    6.79    1.80
  -7   0  -5   16.04    1.94
   0   5   0   -5.49    3.77
  -3   4  -7  302.38   15.30
  -2   2 -15   11.90    2.02
   0   5  -1  150.80   10.23
  -7   2  -1    4.55    3.20
  -4   4  -4   11.97    1.71
  -1   2 -16    3.72    1.81
   7   1 -11   15.53    2.06
  -6   0  -9    3.03    3.08
  -4   2 -12    1.50    2.95
  -2   4  -9    4.28    4.15
  -3   1 -15   65.43    5.43
   5   1 -16    4.90    1.77
   3   4 -10    8.57    2.01
   0   4 -11   16.70    2.10
  -6   3  -2   63.28    4.89
   1   2 -17    2.18    5.15
   4   4  -8   39.96    3.66
   2   2 -17   13.11    2.14
   0   5  -2    2.78    1.88
   2   4 -11   17.18    2.63
   7   2  -8  108.32    9.39
  -1   5   0   48.71    4.47
   1   5   0   46.68    3.85
   7   0 -12    0.19    3.67
  -1   3 -14   25.44    2.62
   1   5  -1    2.53    3.68
  -2   3 -13    1.65    1.47
   6   3  -8   49.66    4.42
   1   3 -15    4.88    1.71
  -1   5  -1   18.97    2.26
   1   5  -2  133.21    9.81
   3   1 -18    5.11    1.67
   4   2 -16    5.17    3.61
   0   5  -3   50.00    4.45
   8   0  -4  254.98   13.12
   2   3 -15    3.03    4.72
  -4   0 -14    4.12    2.87
   6   0 -15   -1.11    3.14
   8   0  -3   -0.06    3.23
  -5   2 -10   -1.89    3.50
  -5   3  -7    4.88    3.42
   0   1 -18   -6.33    3.02
  -3   2 -14   18.17    2.23
   8   0  -5    2.02    3.96
  -5   0 -12   -0.07    3.50
  -7   2  -2    7.54    1.91
  -6   2  -7   57.36    5.23
  -1   5  -2  108.08    9.47
   1   5  -3   22.84    2.34
   8   0  -2    2.34    2.94
  -7   1  -5   33.62    3.30
   5   4  -2   56.64    4.42
  -4   4  -5    6.71    4.48
   8   0  -6    9.83    1.84
  -6   3  -3    3.34    2.35
   0   2 -17  245.63   14.45
   5   4  -3  249.25   13.19
   5   3 -12   -3.01    4.06
   7   2  -9    1.01    3.34
   3   2 -17   11.51    1.97
  -6   1  -9  133.91   10.10
   5   4  -1   11.12    1.88
   0   3 -15   29.96    2.89
  -2   0 -17    3.63    3.21
   0   5  -4   49.73    3.88
   4   0 -18   -4.88    4.32
   5   2 -15    5.47    4.59
  -4   3 -10   11.41    2.10
   5   4  -4    4.01    1.82
   8   0  -1    1.01    3.36
   4   4  -9   72.76    7.19
  -7   0  -6   -2.15    3.04
   6   2 -13    6.47    1.95
  -1   5  -3    1.26    3.51
   6   3  -9   -1.13    3.51
   1   5  -4   13.28    2.07
   5   0 -17    6.00    4.40
  -3   3 -12   26.18    2.44
  -3   4  -8   -1.13    3.47
   7   1 -12    5.99    1.81
  -1   0 -18    2.06    3.43
  -1   4 -11   18.25    2.20
   8   0  -7   -0.08    3.88
   5   4   0    3.21    2.35
  -5   4   0    6.63    1.67
   2   0 -19   -0.07    3.58
   1   4 -12    0.20    3.45
   5   4  -5  101.91    9.32
   4   3 -14   -2.69    7.18
   1   0 -19   77.63    5.60
   2   5  -1   17.81    2.09
   3   4 -11   30.27    3.20
   2   5   0   18.46    2.25
  -2   5   0   13.31    2.11
   8   1  -4   34.97    3.13
   2   5  -2   19.08    2.27
   3   3 -15   12.92    2.59
   8   1  -3   96.25    8.76
  -7   2  -3   31.31    3.12
  -4   1 -14   52.75    5.25
   6   1 -15   30.49    2.94
   8   0   0   27.97    2.59
  -2   4 -10   14.24    2.20
  -8   0   0   26.91    2.67
   8   1  -5    5.80    1.79
  -3   0 -16   -5.68    3.90
   7   0 -13   36.50    3.34
  -5   1 -12   16.17    2.13
  -2   5  -1  200.50   11.83
  -5   4  -1   46.99    3.79
   0   5  -5  268.60   13.63
   2   5  -3   62.90    5.39
   8   1  -2    3.38    3.75
  -1   5  -4   42.75    3.62
   2   4 -12   16.01    2.69
   1   5  -5    3.07    4.14
   0   4 -12   12.75    1.96
  -6   3  -4    5.77    1.53
   8   0  -8  121.60    9.57
   5   4  -6   22.38    2.49
   8   1  -6   96.80    8.84
  -6   0 -10   29.78    2.68
   7   2 -10   12.58    2.25
  -4   4  -6    4.94    4.12
   3   0 -19   87.46    7.16
  -2   1 -17    5.26    3.73
   4   1 -18   69.80    6.94
  -5   3  -8   -4.50    4.17
  -2   5  -2    4.19    3.66
   8   1  -1    3.29    2.39
  -7   1  -6   47.24    4.51
   2   5  -4   10.88    1.88
   5   1 -17   -1.77    3.55
   6   3 -10   14.41    2.43
  -4   2 -13   69.63    5.81
  -8   0  -1    1.21    3.58
  -6   2  -8   -2.03    3.65
   4   4 -10    5.17    5.48
  -1   1 -18   55.33    5.30
   8   1  -7   -2.35    3.83
  -5   4  -2   18.80    2.31
   2   1 -19   46.56    3.81
  -2   2 -16   15.46    2.29
   0   0 -19    0.14    3.53
   1   1 -19   18.49    2.33
   6   0 -16    5.10    2.65
   5   4  -7   25.63    2.79
   5   3 -13    3.88    4.89
  -2   3 -14   38.35    3.74
  -1   5  -5   -5.39    4.32
  -1   3 -15  248.11   14.53
  -5   2 -11   89.75    6.45
  -1   2 -17    5.27    4.34
   8   0  -9   -4.27    3.56
   1   5  -6  103.12    9.71
   0   5  -6   -1.54    4.03
  -7   2  -4   34.18    3.40
   8   1   0   51.88    4.76
  -8   1   0   55.14    4.68
  -2   5  -3   74.97    5.43
  -7   0  -7  211.53   12.03
  -3   1 -16    2.61    2.41
   1   3 -16    2.07    3.55
   2   2 -18   14.89    2.25
   7   1 -13   22.53    2.36
   4   2 -17   88.68    8.47
   2   5  -5    3.98    3.86
   1   2 -18  125.98   10.61
  -3   4  -9    2.54    4.43
   2   3 -16   24.28    2.56
   6   2 -14   13.98    2.25
   8   1  -8    1.25    3.68
  -6   1 -10   11.56    2.00
  -5   0 -13  124.06   10.91
  -4   3 -11    6.57    5.48
  -6   3  -5    4.20    4.28
   7   2 -11   10.79    2.14
   3   4 -12    8.22    2.59
   3   1 -19    1.68    5.05
  -3   2 -15   38.14    3.62
   5   2 -16   22.30    2.40
  -4   0 -15   -0.66    3.33
  -5   4  -3  123.18    9.69
  -8   0  -2  217.77   12.33
  -1   4 -12    4.29    3.74
   7   0 -14   -4.32    3.61
   1   4 -13   -1.80    3.62
   5   4  -8    8.96    1.80
  -8   1  -1   70.64    5.47
  -4   4  -7   37.37    3.27
  -2   5  -4   -1.49    3.11
  -3   3 -13    1.28    3.35
   6   3 -11   11.71    2.16
  -2   4 -11    2.83    1.49
   4   3 -15   -4.65    4.06
   0   3 -16  111.02   10.44
   0   1 -19   29.43    2.86
   2   5  -6   19.24    2.37
   3   2 -18  163.84   11.89
  -1   5  -6   -9.96    4.39
   8   0 -10   42.03    4.14
   3   5  -1   17.78    2.37
   3   5  -2  183.04   12.24
   1   5  -7    5.04    5.27
   6   1 -16   29.08    3.14
   5   0 -18   -1.78    2.93
   7   3  -3   -5.01    4.74
   7   3  -4   -2.09    3.48
   2   4 -13    3.68    1.67
  -3   5   0  135.91   10.36
   4   0 -19   -1.24    3.36
   4   4 -11    4.65    3.66
   0   2 -18   59.24    5.76
   3   5   0  133.60   10.47
   0   5  -7    0.41    3.81
   8   1  -9   22.66    2.78
   7   3  -2   -1.24    3.37
  -7   1  -7   58.84    4.86
   3   5  -3    1.40    2.70
   3   3 -16   -3.29    4.32
   7   3  -5    4.35    4.12
   0   4 -13    1.80    4.07
  -5   3  -9   37.27    3.68
  -7   2  -5    2.91    3.82
  -2   0 -18   41.70    4.02
   7   3  -1  162.22   10.76
  -3   5  -1   12.23    2.17
  -5   1 -13   28.26    2.74
  -6   0 -11   -1.25    3.68
   3   5  -4    2.42    3.51
  -5   4  -4    4.05    3.92
  -6   2  -9    6.47    5.00
  -8   0  -3    3.20    4.00
   7   3  -6   26.96    2.66
  -4   1 -15    4.56    1.45
  -8   1  -2   -0.39    3.24
  -2   5  -5    2.11    2.80
   2   0 -20    8.69    2.14
  -1   0 -19   -3.30    4.33
   7   1 -14    2.71    3.73
   5   3 -14    3.51    3.10
   5   4  -9    8.22    5.86
   2   5  -7    4.80    5.67
   7   2 -12   61.09    5.51
  -6   3  -6   73.26    5.88
  -7   0  -8   -4.08    3.81
  -3   5  -2   47.04    3.89
  -7   3   0   16.56    2.22
   7   3   0   17.20    2.26
   1   0 -20   -1.82    3.36
  -3   0 -17   33.63    3.26
  -3   4 -10    7.64    1.97
   3   5  -5   -2.77    4.42
   8   1 -10  101.13   10.00
   8   0 -11   -5.58    3.61
  -1   5  -7   -5.27    3.77
   5   1 -18   -7.34    4.12
   8   2  -4    7.07    2.19
   7   3  -7   11.34    2.03
   1   5  -8   -5.57    3.60
   6   2 -15  129.64   10.38
   8   2  -3   -0.42    3.68
  -4   2 -14    2.09    4.28
   6   0 -17   -3.37    4.67
   4   1 -19   26.85    2.90
   8   2  -5   33.58    3.13
  -5   2 -12  113.20   10.15
   3   4 -13    5.84    4.43
   6   3 -12   45.69    4.43
   0   5  -8   32.38    3.08
  -4   4  -8    9.28    1.98
   8   2  -2    3.92    3.52
   3   0 -20    1.69    2.16
  -2   1 -18  118.31   10.65
  -2   3 -15   13.54    2.39
   8   2  -6   37.67    3.42
   7   0 -15   33.99    3.12
  -6   1 -11   38.24    3.65
  -7   3  -1  107.57    9.13
  -3   5  -3   22.50    2.54
  -1   3 -16    5.45    5.54
  -5   4  -5   14.83    2.18
  -4   3 -12    1.27    4.12
  -8   1  -3   40.31    3.45
  -2   2 -17  127.03   11.08
   4   4 -12    8.98    7.74
   3   5  -6  106.21    9.71
   4   2 -18   11.61    2.07
   1   3 -17   59.17    5.45
  -1   4 -13   35.69    3.32
   2   3 -17   -7.76    4.01
   8   2  -1  123.93    9.87
  -7   2  -6   43.48    3.92
  -2   5  -6    1.55    3.69
   2   1 -20    2.74    3.44
  -8   0  -4   15.64    2.14
   7   3  -8   -0.78    3.88
  -1   1 -19   16.29    2.36
   1   4 -14   21.24    2.53
   5   2 -17   56.17    5.55
   2   5  -8   83.42    6.83
  -2   4 -12   28.39    2.72
   6   4  -3    4.10    4.67
   8   2  -7    4.50    3.61
  -7   1  -8   57.19    4.96
  -1   2 -18   38.91    3.15
   5   4 -10   12.28    2.25
   6   4  -2   79.93    5.82
  -5   0 -14   -0.17    3.55
   2   2 -19   63.72    5.93
   1   1 -20   12.69    2.07
   6   4  -4   12.65    2.03
  -3   1 -17   34.96    3.27
   0   0 -20    3.53    4.33
   4   3 -16    5.20    3.76
   2   4 -14   41.14    3.97
   1   2 -19   -4.09    4.71
   8   1 -11   16.25    2.39
   6   4  -1   -1.10    4.05
  -5   3 -10   16.75    2.32
   6   1 -17   -5.56    4.52
  -3   3 -14    3.80    3.18
  -8   2   0    3.58    3.68
   8   2   0    8.45    1.96
   6   4  -5    5.75    1.96
  -3   2 -16  233.25   14.43
   7   2 -13    0.98    2.74
   8   0 -12   17.54    2.31
  -7   3  -2   -0.57    4.63
  -6   3  -7   21.30    2.33
  -3   5  -4   84.81    5.86
  -4   0 -16  185.53   13.58
  -1   5  -8  100.69    9.19
   3   1 -20   13.20    2.26
   1   5  -9    7.24    5.52
   0   4 -14   34.28    3.24
   3   5  -7    4.18    1.90
   8   2  -8   -1.90    3.09
   6   4   0   18.36    2.37
  -6   2 -10   -0.17    3.59
  -6   4   0   20.91    2.41
   7   1 -15    1.24    4.25
   0   3 -17   13.47    2.47
   7   3  -9   37.34    3.67
   5   0 -19   -2.27    4.00
   3   3 -17  155.37   11.56
   0   5  -9   65.44    5.75
   6   4  -6   76.40    6.05
   3   2 -19   30.55    3.05
   5   3 -15   43.71    5.16
  -7   0  -9  107.46    8.61
  -6   0 -12   -7.20    3.76
   6   3 -13    1.40    2.25
  -8   1  -4   81.51    6.16
  -5   4  -6    1.28    3.55
  -3   4 -11    2.00    1.90
   4   5  -2    3.61    4.44
  -8   2  -1   21.97    2.53
  -2   5  -7   96.40    8.82
   4   0 -20   82.99    7.82
   4   5  -1    3.18    3.89
  -5   1 -14   41.81    4.06
  -4   4  -9    4.68    5.02
   4   5  -3   88.62    8.69
   0   1 -20    0.73    3.53
   2   5  -9    3.99    3.63
  -6   4  -1   -0.84    4.25
  -8   0  -5   -1.68    4.01
   0   2 -19   31.69    2.83
   6   2 -16   30.06    2.90
   4   5   0   -1.43    4.26
  -4   5   0    3.08    2.62
   3   4 -14   -0.46    3.46
  -7   3  -3    2.82    2.19
   5   4 -11   -3.77    3.76
   8   2  -9   14.88    2.47
   4   5  -4    4.22    4.50
   6   4  -7   52.76    5.25
  -3   5  -5   12.66    2.43
  -7   2  -7   11.22    2.16
   8   1 -12   -0.53    4.19
   4   4 -13   47.64    4.88
  -4   1 -16    1.36    3.19
   3   5  -8   48.91    4.71
   7   0 -16    4.66    3.32
   6   0 -18   14.94    4.23
  -2   0 -19   -4.07    3.90
  -4   5  -1    1.91    3.65
   7   3 -10   44.07    4.39
  -5   2 -13   21.79    2.47
   4   5  -5    2.94    2.66
   8   0 -13   -2.31    3.73
   5   1 -19   -5.21    5.48
  -6   4  -2   20.81    2.36
  -4   2 -15  187.08   14.11
  -7   1  -9   37.82    3.59
  -8   2  -2    4.90    3.51
  -1   5  -9    2.19    3.89
   2   0 -21   -7.15    4.06
  -6   1 -12   10.47    2.01
   1   5 -10   69.13    6.13
  -4   3 -13    2.15    4.21
   7   2 -14   18.18    2.38
  -3   0 -18   -2.33    4.06
  -1   4 -14   33.18    3.24
  -1   0 -20   -4.09    3.57
   4   1 -20   26.70    2.91
  -6   3  -8    9.19    2.02
  -2   4 -13   22.32    2.73
   6   4  -8   24.64    2.75
   9   0  -4    1.90    4.09
   1   4 -15    8.05    5.72
   9   0  -5  190.33   12.93
  -2   3 -16  113.27    7.67
   1   0 -21    2.29    1.93
  -4   5  -2   -7.16    4.06
  -8   1  -5   45.96    4.14
   9   0  -3   16.86    2.44
   8   2 -10    0.66    2.17
   0   5 -10    2.08    1.84
   5   2 -18   -2.12    4.62
   2   4 -15   12.55    2.65
   4   5  -6   -0.07    5.19
  -5   3 -11   29.34    2.82
  -2   5  -8    0.37    4.12
   9   0  -6   -0.21    4.11
  -1   3 -17   72.30    6.61
  -5   4  -7   57.79    4.69
  -7   3  -4   -4.21    4.58
   4   2 -19   40.69    3.39
   2   3 -18   -5.98    3.84
  -3   5  -6   43.84    4.05
   4   3 -17    9.08    8.83
   2   5 -10    4.88    1.91
   3   0 -21    6.97    2.08
   1   3 -18   -1.76    4.17
   9   0  -2    4.38    3.95
   7   1 -16   -2.64    3.94
   6   3 -14   20.24    2.65
   6   1 -18    4.23    5.19
  -2   1 -19    3.71    4.21
  -8   0  -6   97.88    9.30
   3   5  -9    2.84    4.01
  -2   2 -18   16.22    2.59
  -6   4  -3    6.47    2.17
   9   0  -7   26.55    2.53
  -5   0 -15   -1.11    3.84
  -6   2 -11   30.76    2.93
   5   4 -12   -2.62    3.57
   8   1 -13  120.72   11.46
   7   3 -11    0.43    3.83
   0   4 -15   12.48    2.18
  -7   0 -10   -1.45    4.33
  -3   3 -15   37.75    3.39
  -8   2  -3   52.19    5.15
   5   3 -16    0.94    4.56
  -4   4 -10   15.44    2.25
  -4   5  -3   18.63    2.37
   2   1 -21   46.44    4.13
   2   2 -20   -1.46    4.05
   9   0  -1   81.10    6.21
  -1   2 -19    4.20    1.81
  -3   4 -12   10.58    2.35
   4   5  -7   45.29    4.46
  -1   1 -20   13.15    2.45
  -3   1 -18   14.23    2.42
  -7   2  -8   40.84    3.37
   9   1  -4   -1.79    4.23
   1   2 -20    7.37    5.12
  -3   2 -17    3.14    2.97
   9   1  -5   -2.17    5.00
   1   1 -21   49.52    4.28
   9   0  -8   -7.34    4.18
   3   3 -18   72.25    6.75
   4   4 -14    4.77    3.83
  -6   0 -13   -1.69    3.44
   8   0 -14   17.65    2.52
   9   1  -3   11.32    2.09
   8   2 -11   64.66    5.21
   0   0 -21   -2.03    3.64
   3   4 -15   35.02    3.93
  -4   0 -17    3.11    4.53
   6   2 -17   88.00    7.09
   9   1  -6    1.89    4.82
   0   3 -18    6.69    1.90
   5   0 -20    2.90    4.06
  -1   5 -10   29.96    2.99
   1   5 -11    1.97    3.80
   3   1 -21   43.88    4.35
  -9   0   0   -6.15    4.24
   9   0   0    2.21    2.40
   9   1  -2   -8.16    4.52
  -7   3  -5   69.75    6.51
   7   0 -17   23.83    2.70
   3   2 -20   84.83    7.21
  -8   1  -6   14.58    2.48
  -3   5  -7   -0.57    3.99
  -6   4  -4   64.63    5.44
   9   1  -7    6.46    1.95
   7   2 -15    3.76    4.35
  -4   5  -4    5.28    4.24
  -5   1 -15    0.65    4.06
  -6   3  -9    0.88    4.59
  -2   5  -9   12.53    2.24
   9   0  -9   20.80    2.61
  -7   1 -10   41.20    3.97
   3   5 -10   23.23    3.09
   4   5  -8    8.22    2.31
  -5   4  -8    3.49    3.73
   0   5 -11   29.34    2.70
   4   0 -21   -2.50    4.25
   2   5 -11   19.24    2.66
  -8   2  -4    2.49    4.21
   9   1  -1   15.75    2.28
   6   4 -10   23.77    2.98
   6   0 -19   -2.12    3.73
   7   3 -12   24.11    2.72
  -5   2 -14   34.62    3.07
   9   1  -8   15.42    2.36
   0   2 -20   71.80    6.42
  -8   0  -7    4.11    3.80
  -9   0  -1   65.60    5.60
   8   1 -14   20.22    2.71
  -6   1 -13    1.32    3.78
   5   4 -13   -2.43    5.68
   0   1 -21   30.51    2.90
   8   3  -4   16.80    2.33
  -2   4 -14   -5.56    3.63
  -1   4 -15    4.57    2.02
  -4   1 -17   51.77    4.55
   8   3  -3   -1.17    3.63
   6   3 -15   13.61    2.54
  -4   3 -14   46.66    4.40
   5   1 -20   12.97    9.87
   8   3  -5    9.13    2.18
  -5   3 -12    5.29    4.63
   8   2 -12   11.74    2.50
   1   4 -16    0.17    5.26
  -9   1   0   62.22    5.46
   9   1   0   66.39    5.63
  -4   2 -16   47.63    4.39
   2   4 -16    2.44    4.96
   8   3  -2   30.35    2.81
   7   1 -17    3.53    4.21
   9   0 -10   -0.01    4.49
   5   5  -2    3.92    3.66
  -4   5  -5   56.98    4.54
   5   5  -3    3.82    4.42
   8   3  -6  123.96   11.99
  -2   0 -20   83.02    6.80
  -4   4 -11   45.23    4.41
   5   2 -19   33.65    3.33
  -6   4  -5   -1.21    4.00
   5   5  -1   -8.96    4.57
  -2   3 -17   -2.24    4.49
   9   1  -9    3.88    4.07
   5   5  -4   62.42    6.01
   4   3 -18   60.77    5.80
  -7   2  -9    4.41    4.42
   8   0 -15    4.23    3.90
   4   5  -9    5.13    2.13
   4   1 -21  124.55    8.66
   8   3  -1   15.99    2.40
  -7   3  -6    3.35    2.12
  -6   2 -12   59.75    4.65
  -7   0 -11   64.59    5.63
   6   1 -19   -1.97    4.72
   5   3 -17   -3.44    5.83
  -3   5  -8   30.11    2.90
   4   2 -20   -0.01    4.53
   2   0 -22   36.65    3.39
   5   5   0   68.13    6.40
   8   3  -7    2.48    5.03
  -3   0 -19   82.97    6.41
  -1   3 -18    3.80    1.83
  -5   5   0   60.51    5.96
  -1   5 -11   12.72    2.43
   2   3 -19    8.10    2.26
  -3   4 -13    0.56    4.86
  -9   0  -2   -4.39    4.14
   4   4 -15   11.10    8.19
   6   4 -11   61.70    5.93
   1   5 -12   42.30    4.09
   5   5  -5   16.88    2.58
   0   4 -16   -2.10    3.34
  -8   2  -5   81.63    6.13
  -8   1  -7  100.14    9.76
   3   5 -11    1.95    4.32
  -9   1  -1   10.10    2.07
  -1   0 -21   -4.49    4.54
   1   3 -19   27.44    3.04
   7   4  -3   95.64    9.21
   7   4  -4   55.94    5.50
  -2   5 -10    1.99    3.92
   8   3   0   58.36    5.28
  -8   3   0   54.62    5.11
   1   0 -22    3.90    4.08
   7   4  -2    4.86    1.95
  -5   0 -16    3.53    4.22
  -3   3 -16    3.54    4.23
   7   3 -13   81.79    6.97
   3   4 -16    8.75    7.52
   7   4  -5   18.33    2.64
  -5   5  -1    2.28    4.14
  -5   4  -9    1.01    4.03
   3   0 -22    3.04    3.39
   2   5 -12    1.27    4.64
   7   2 -16    5.05    1.86
   9   0 -11    3.02    3.44
   6   2 -18   -0.36    4.72
  -2   2 -19    1.26    4.62
   0   6   0  169.76   11.97
   0   5 -12    4.15    4.67
   9   1 -10  119.73    8.26
   8   3  -8    1.86    5.04
   5   5  -6   -2.53    4.01
  -6   3 -10  129.52   11.01
   0   6  -1   -7.39    4.19
   7   4  -1   16.68    2.37
   7   0 -18    2.71    3.61
  -6   0 -14   37.81    3.42
  -2   1 -20    3.96    3.70
   8   2 -13    3.60    4.30
  -4   5  -6    8.56    1.94
   3   3 -19   64.79    6.15
   7   4  -6   16.99    2.53
   8   1 -15   -1.01    4.70
   0   6  -2    4.58    4.17
  -8   0  -8    4.33    3.11
   2   2 -21    9.49    2.36
  -7   1 -11    1.31    4.27
   5   4 -14    9.99    6.87
  -1   6   0    5.52    4.43
   1   6   0    5.59    4.07
   1   6  -1  116.52   10.52
  -3   2 -18   15.08    2.29
  -6   4  -6   -0.70    4.83
  -8   3  -1   36.05    3.25
  -1   2 -20   83.69    6.79
   2   1 -22   19.16    2.61
   4   5 -10    4.61    4.20
  -3   1 -19   10.34    2.37
  -7   4   0    0.09    3.79
  -5   5  -2   56.15    5.47
   7   4   0   -4.20    4.12
   9   2  -4    2.18    2.92
   5   0 -21    7.22    2.93
  -9   1  -2    0.97    4.43
   9   2  -5   17.65    2.76
  -9   0  -3    2.90    3.11
  -1   6  -1   23.31    2.75
   1   6  -2   -1.60    4.30
   1   2 -21   -5.52    4.38
   0   3 -19   26.74    2.98
   9   2  -3   20.35    2.31
  -1   1 -21   -5.40    3.57
  -4   0 -18   59.78    4.94
   6   3 -16   36.44    3.60
   5   5  -7    7.91    6.17
   0   6  -3   42.90    4.14
   7   4  -7   27.32    2.88
   9   2  -6   16.12    2.47
   8   3  -9   12.92    2.43
   1   1 -22   18.03    2.58
  -7   3  -7    3.89    4.49
  -5   1 -16  136.78   12.01
   6   4 -12    0.74    3.92
  -1   6  -2   -3.54    4.16
   3   2 -21   25.28    3.09
   1   6  -3   25.95    3.00
   9   2  -2   28.84    2.80
  -3   5  -9   -5.22    4.59
   6   0 -20   -2.48    5.62
   9   1 -11   30.10    3.06
   3   1 -22   -2.61    4.45
   0   0 -22   -4.90    4.45
  -8   2  -6   23.26    2.65
   8   0 -16    4.67    4.25
  -2   4 -15    0.99    4.50
   9   0 -12    2.64    1.81
  -5   3 -13   62.47    5.76
   9   2  -7    6.87    4.95
  -7   4  -1   38.73    3.51
  -5   2 -15    8.29    2.19
   7   1 -18    0.28    4.86
  -6   1 -14   11.20    2.19
  -1   4 -16   34.70    3.38
   3   5 -12   10.88    2.88
  -4   4 -12   37.03    3.53
  -7   2 -10    3.16    2.54
  -5   5  -3    3.91    4.53
  -4   3 -15   -0.66    4.57
   0   6  -4   62.48    5.09
  -8   3  -2    3.61    4.31
   4   0 -22   13.00    2.91
   1   4 -17   -1.02    4.75
  -1   5 -12   12.25    2.52
   2   4 -17   38.14    3.80
  -1   6  -3   84.36    6.54
  -8   1  -8   -4.88    4.43
   9   2  -1   12.72    2.28
   7   4  -8    0.64    4.73
   1   6  -4    2.39    6.05
   1   5 -13    3.50    5.39
   7   3 -14   36.76    3.53
   5   5  -8   69.52    6.88
  -4   5  -7   14.55    2.49
  -2   5 -11  176.72   12.73
   5   1 -21   -2.04    4.90
  -9   1  -3   26.23    2.91
   9   2  -8    8.39    6.15
  -7   0 -12    3.73    3.50
   2   6  -1   28.49    2.85
   8   3 -10   20.67    3.01
   8   2 -14   -3.37    4.83
   4   4 -16   14.89    3.81
  -6   2 -13   -5.26    4.62
   2   6   0   24.95    2.90
  -4   1 -18   71.26    6.81
  -2   6   0   33.21    3.23
  -4   2 -17    4.56    6.06
   0   2 -21    8.03    2.46
   5   3 -18    6.38    7.00
   2   6  -2    7.40    2.16
   2   5 -13   54.45    4.85
  -5   4 -10   16.90    2.72
  -9   0  -4   -1.27    3.77
   4   3 -19   29.55    3.93
   4   5 -11   46.84    4.27
   5   2 -20   53.51    4.52
  -3   4 -14    3.45    3.03
  -7   4  -2    0.32    4.13
  -6   4  -7   33.26    3.32
  -9   2   0    0.32    4.12
  -2   6  -1    1.05    3.79
   9   2   0    8.60    2.17
   0   6  -5    2.78    2.22
   0   5 -13    2.23    4.70
   6   1 -20    4.59    4.70
  -1   6  -4    1.28    4.43
   2   6  -3    3.50    5.15
   0   1 -22   18.12    2.63
   7   2 -17   -4.01    4.06
   1   6  -5  106.92   10.25
  -2   3 -18   47.73    3.97
   8   1 -16    7.20    5.24
   9   1 -12    5.05    3.55
   0   4 -17    2.83    2.55
  -6   3 -11   -0.76    4.64
  -5   5  -4   32.14    3.03
   7   4  -9   15.29    2.73
   3   4 -17    5.26    4.76
  -8   0  -9   -2.95    3.87
  -8   3  -3    6.88    2.07
   9   2  -9   25.83    3.01
   5   4 -15    3.42    3.81
  -2   6  -2   45.72    4.34
   4   1 -22  140.90   13.52
   4   2 -21   19.35    2.73
   2   6  -4   13.97    2.40
   9   0 -13    2.33    4.37
   6   4 -13   -1.88    5.18
   2   3 -20   70.48    5.81
  -1   3 -19   38.04    3.64
   6   2 -19    1.96    4.54
  -2   0 -21    4.72    3.91
   5   5  -9   22.26    2.82
   7   0 -19   12.15    2.26
  -7   3  -8   12.51    2.23
   1   3 -20    1.59    4.70
  -3   3 -17    5.26    4.75
  -3   5 -10  140.05   12.33
  -8   2  -7   39.83    3.56
  -7   1 -12    8.08    2.18
  -9   2  -1    8.75    2.14
   8   3 -11   27.84    3.14
  -3   0 -20    2.02    4.12
  -5   0 -17    4.48    1.88
  -1   6  -5    0.93    4.65
  -7   4  -3   80.58    6.46
  -9   1  -4   61.00    5.93
   1   6  -6   12.29    2.43
   2   0 -23   -4.25    5.21
   6   3 -17    0.93    4.69
   0   6  -6   39.88    3.80
  -6   0 -15    1.12    3.34
  -2   6  -3   13.17    2.47
   3   5 -13   -2.76    6.10
   2   6  -5   -2.42    4.44
  -4   5  -8   -1.28    5.54
   3   3 -20   43.75    4.17
  -1   0 -22    0.46    3.31
   8   0 -17   -5.19    4.66
   9   2 -10   24.92    3.17
  -9   0  -5  254.62   14.34
   7   3 -15   12.87    2.50
   7   4 -10   -8.04    5.19
  -2   2 -20   38.09    3.46
   3   0 -23   79.55    7.48
   1   0 -23  142.89   11.94
  -8   1  -9   24.01    2.49
  -5   5  -5   -0.77    4.74
   4   5 -12    5.81    4.28
   8   2 -15  122.03    8.78
  -1   5 -13    8.44    2.07
  -7   2 -11   61.43    5.77
  -8   3  -4   20.80    2.67
   9   1 -13   44.50    4.16
   1   5 -14   -2.51    4.86
  -4   4 -13   -1.68    4.08
  -2   1 -21   -2.80    4.62
   7   1 -19   12.33    2.35
  -2   5 -12   -4.44    4.30
   5   0 -22    3.35    4.72
   2   2 -22   -4.68    5.42
  -6   4  -8   47.02    4.62
   6   5  -3    4.72    4.82
  -3   2 -19   -3.47    4.57
   5   5 -10    5.76    4.70
  -2   6  -4   -0.04    3.13
  -5   3 -14    1.98    4.58
  -9   2  -2   65.27    5.37
   6   5  -2    0.34    4.30
   0   3 -20  122.42    8.88
  -2   4 -16    9.96    7.06
   2   6  -6   22.94    2.92
   6   5  -4    3.58    2.39
  -1   6  -6   -0.79    4.79
   6   0 -21   -3.75    3.97
   2   5 -14   19.33    2.90
   3   6  -1   30.67    3.08
  -1   2 -21   -1.59    5.44
   3   6  -2   -5.61    4.86
  -3   1 -20   -6.85    4.32
   1   6  -7   37.69    3.68
  -5   1 -17   29.49    3.15
  -5   4 -11   50.04    4.54
   6   5  -1   11.25    2.55
  -1   4 -17   51.70    4.58
   9   0 -14    3.44    4.35
   2   1 -23    2.79    2.13
   3   6   0    4.49    1.89
  -3   6   0    3.38    2.15
   0   6  -7   65.22    6.46
  -7   4  -4   -4.42    5.88
  -4   0 -19   -1.08    4.57
  -6   1 -15    1.44    3.68
   6   5  -5   63.22    6.10
   1   2 -22   34.95    3.27
   3   6  -3   -1.17    4.99
   8   3 -12    2.45    4.06
   2   4 -18   13.66    2.80
  -5   2 -16    3.03    4.47
   4   4 -17    7.33    5.71
   1   4 -18   27.77    3.06
  -4   3 -16    4.45    4.18
   6   4 -14    4.75    4.86
   3   2 -22  123.82   11.82
   9   2 -11   21.93    3.16
   0   5 -14    6.58    2.17
   8   1 -17   42.94    3.98
  -1   1 -22   53.62    4.53
  -7   0 -13    4.96    1.96
  -3   6  -1   15.63    2.62
   6   5   0    0.06    5.78
  -9   1  -5    3.50    5.58
  -6   5   0    3.71    4.54
   3   6  -4    5.61    5.79
   7   2 -18   18.37    2.67
  10   0  -5    1.71    4.45
  -6   2 -14    4.63    5.16
   1   1 -23   -5.20    4.31
   3   1 -23    9.00    2.12
   5   3 -19   -0.91    9.22
  10   0  -4    3.15    4.14
   7   4 -11   28.67    3.19
   6   5  -6    7.41    2.35
  -8   0 -10   -2.74    4.25
   5   4 -16   -1.38    6.03
  -3   4 -15   12.99    2.46
  10   0  -6    1.95    5.06
  -7   3  -9   17.67    2.48
  -6   3 -12   25.72    3.02
  -2   6  -5    3.21    3.64
  -8   2  -8    6.37    5.10
  10   0  -3   -0.21    3.34
   0   0 -23   -6.34    4.85
  -5   5  -6   44.47    3.94
   2   6  -7    4.70    5.24
   4   0 -23   -3.17    4.50
  -3   5 -11   32.03    3.25
   5   1 -22   44.31    4.85
   4   3 -20   42.53    4.30
  -4   5  -9   28.34    3.07
  -3   6  -2   45.91    4.07
   5   2 -21    2.34    4.91
  10   0  -7   -8.16    4.95
  -9   2  -3   34.91    3.41
  -9   0  -6    4.55    3.75
  -6   5  -1   22.61    2.62
   3   6  -5   70.79    6.68
  -8   3  -5   -6.92    4.37
   3   4 -18   15.55    3.58
   6   1 -21   -5.92    5.96
  -4   2 -18    2.39    4.49
  -1   6  -7   15.16    2.60
   3   5 -14   30.94    4.03
  10   0  -2   39.82    3.74
   9   1 -14   -2.95    5.15
   5   5 -11    5.38    2.14
   1   6  -8    3.16    2.83
   0   4 -18    4.61    3.80
   6   5  -7   81.68    6.63
  -4   1 -19    4.75    4.86
   4   5 -13    3.28    5.54
   7   0 -20    2.19    3.85
   0   6  -8    9.16    2.27
   6   2 -20   -0.11    4.97
  10   0  -8    1.04    4.45
  -7   4  -5    2.62    5.09
   7   3 -16   -3.34    5.32
   6   3 -18   -3.20    4.55
   0   2 -22   70.17    6.75
  -2   3 -19   16.21    2.83
  -7   1 -13   16.67    2.80
   8   2 -16    3.89    4.25
   9   2 -12   23.16    2.96
   8   0 -18    3.44    4.85
  -3   6  -3    1.58    5.23
  10   1  -5   18.64    2.89
   8   3 -13   -0.67    4.11
  -6   4  -9    3.26    5.50
  10   1  -4   26.14    3.03
  10   0  -1    1.28    5.10
  -6   5  -2    5.95    6.00
  -8   1 -10    2.78    4.32
   3   6  -6    4.14    4.90
  10   1  -6   35.56    3.31
   4   2 -22    5.92    4.83
   9   0 -15  183.55   13.99
  -2   6  -6  109.01    9.92
   2   3 -21    4.12    2.23
  10   1  -3   24.95    2.89
   2   6  -8   35.77    3.35
  -1   5 -14    4.75    5.31
   0   1 -23    2.25    3.33
  -1   3 -20   12.88    2.45
   4   1 -23   22.08    3.27
   7   4 -12    0.27    4.84
  -3   3 -18    2.18    3.84
   6   5  -8    9.12    2.54
  -2   5 -13    0.97    4.86
   9   3  -4    9.10    6.73
  10   0  -9    1.61    3.12
   1   5 -15    5.10    4.43
  10   1  -7   11.97    2.39
   9   3  -5   77.77    6.66
  -6   0 -16   47.11    4.66
  -9   1  -6    5.10    4.75
   1   3 -21   60.54    5.43
  -7   2 -12   51.30    5.06
   9   3  -3    6.19    5.10
   8   4  -4    2.51    5.60
  10   1  -2   -1.92    4.73
   2   5 -15   63.92    5.89
   6   4 -15    3.43    6.17
   9   3  -6    4.93    5.93
   8   4  -3   -4.04    4.58
  -4   4 -14    9.04    6.10
  -5   0 -18    1.04    4.01
  -9   2  -4    6.10    5.03
  -5   5  -7    1.75    4.08
   8   4  -5   45.26    3.84
  -5   4 -12   19.62    2.98
  -2   0 -22    0.88    4.89
  10   0   0   33.16    3.35
 -10   0   0   36.53    3.54
  -3   6  -4   -4.09    4.94
  -1   6  -8    7.27    4.97
   3   3 -21   29.84    3.13
   7   1 -20    1.20    5.16
   9   3  -2   14.60    2.68
   8   4  -2   32.28    3.07
  10   1  -8   54.37    4.63
   1   6  -9    3.22    5.65
   3   6  -7    1.68    4.58
  -8   3  -6   27.57    3.14
  -3   0 -21   11.01    2.39
  -6   5  -3    3.50    5.79
   8   4  -6   -3.04    4.88
   8   1 -18   -2.16    4.06
   9   3  -7   53.50    5.12
  -5   3 -15   27.77    3.05
   5   5 -12   21.42    3.58
   2   0 -24   13.19    2.70
   0   5 -15   25.14    2.75
   0   6  -9    1.85    3.63
  -8   2  -9   66.00    6.40
  10   1  -1   14.42    2.80
  -7   3 -10    0.18    4.85
  -2   4 -17    5.07    2.28
  -9   0  -7    5.06    5.18
  10   0 -10   -3.05    4.89
   4   4 -18   11.26    8.72
  -4   5 -10    6.46    2.43
   9   1 -15   -8.19    5.33
   8   4  -1   54.19    4.60
  -7   4  -6   -0.12    4.63
   9   3  -1    5.10    3.70
   9   2 -13   36.35    3.59
   6   5  -9   80.34    7.04
  -3   5 -12    6.64    6.19
   5   4 -17   -9.28    7.86
  -2   2 -21   36.50    3.72
  -8   0 -11    3.54    4.02
   4   6  -2   39.18    3.79
   6   0 -22    2.87    2.82
  -2   6  -7   14.15    2.70
   7   2 -19   -5.28    5.15
   8   4  -7   50.07    4.71
  -1   0 -23    2.88    6.92
   4   6  -1    4.73    3.21
   2   4 -19   14.34    2.88
  -1   4 -18   79.48    7.45
   5   0 -23    0.94    6.24
   4   6  -3    5.25    4.89
  10   1  -9    1.34    6.12
   3   0 -24   -2.43    5.34
   2   6  -9   -6.78    5.43
   9   3  -8    7.54    5.98
  -6   1 -16    6.19    5.10
  -7   0 -14    1.36    4.33
   4   5 -14   -2.75    5.14
   8   3 -14    3.21    4.31
  -6   3 -13   76.64    6.80
   1   4 -19   29.35    3.31
 -10   0  -1    2.53    2.55
   1   0 -24    3.02    5.13
  -3   2 -20   73.17    7.15
   4   6   0    1.70    4.64
  -5   2 -17   17.91    2.76
   0   3 -21   10.88    2.91
  -4   3 -17    2.27    2.32
  -4   6   0    4.41    5.20
   3   5 -15    0.64    6.07
  -5   1 -18   44.82    4.10
   2   2 -23   46.75    4.08
  -8   4   0    1.84    2.52
   4   6  -4    8.07    2.39
  -6   2 -15   40.53    3.62
   5   3 -20   -3.24    5.69
  -3   6  -5    3.41    4.94
   8   4   0   -1.95    4.81
  -3   4 -16   67.75    5.87
   7   4 -13   -2.99    4.51
  -2   1 -22    0.27    4.50
  10   1   0   28.41    3.15
 -10   1   0   28.45    2.89
  -9   3   0   62.76    5.70
   9   3   0   47.21    4.59
   3   6  -8    9.60    6.44
   7   3 -17   49.07    4.39
  -1   2 -22    9.32    2.42
   8   2 -17    3.46    5.01
   9   0 -16    4.11    3.19
  -6   5  -4    6.55    5.35
  -3   1 -21   20.16    2.69
   8   4  -8   44.81    4.10
  -4   6  -1   14.38    2.33
  -4   0 -20    7.36    5.03
  -6   4 -10   34.61    3.35
  -9   2  -5   21.47    2.85
  10   0 -11   -0.75    4.24
   4   6  -5    3.06    5.19
   3   2 -23    6.46    6.12
   1   2 -23    3.30    2.63
   2   1 -24   24.43    3.25
  -9   1  -7   73.98    6.75
   3   4 -19   14.76    3.19
   9   3  -9    2.43    4.74
  10   1 -10    6.84    4.64
  -1   6  -9    7.78    6.50
  -5   5  -8    0.01    5.68
   4   3 -21    5.48    4.04
   8   0 -19  -13.85    5.61
   1   6 -10    0.99    4.61
   6   5 -10    6.35    5.23
   6   3 -19    1.63    5.11
  -8   1 -11   96.00    7.37
   6   1 -22   -8.45    7.22
   5   2 -22   -3.41    4.74
  -8   4  -1    9.83    2.26
  -1   1 -23    1.44    5.82
   5   1 -23   61.57    5.86
   7   0 -21    6.89    2.35
   3   1 -24    4.56    3.24
   0   4 -19    4.31    3.13
  -7   1 -14   35.90    3.29
  -4   6  -2   21.29    2.67
  -8   3  -7   11.55    2.32
   6   2 -21    1.79    8.38
 -10   0  -2   22.76    3.02
  -9   3  -1    3.03    5.14
   1   1 -24   19.28    2.87
   0   6 -10   19.11    2.99
 -10   1  -1   -2.26    4.55
  -2   5 -14   15.67    2.71
   5   5 -13    7.33    5.88
   6   4 -16    1.46    2.39
   4   6  -6   77.86    7.40
  -1   5 -15   16.72    2.71
   4   0 -24  142.19   11.63
   9   2 -14    0.68    4.40
  -2   6  -8    5.94    5.38
   8   4  -9   28.31    3.02
  -4   2 -19    7.57    6.02
  -7   4  -7    3.76    5.22
  -3   6  -6    4.50    1.88
   1   5 -16    0.10    5.41
   2   6 -10   -0.94    5.15
   2   5 -16   15.32    3.16
   0   0 -24   64.74    6.45
  -9   0  -8   -4.46    6.14
  -7   2 -13   53.43    4.75
   9   3 -10   13.81    2.89
   3   6  -9   37.70    3.92
   9   1 -16    5.78    4.82
  -4   1 -20   64.97    5.46
  -5   4 -13    0.68    4.37
  -2   3 -20   -3.74    4.50
  10   2  -5    3.81    3.22
  10   1 -11   12.57    2.51
  -4   5 -11    3.48    5.04
  -6   5  -5   80.01    6.69
  10   0 -12    7.19    2.00
  10   2  -4   40.79    3.56
  -8   2 -10   55.18    4.94
  -4   4 -15   51.06    4.40
  -8   4  -2   40.27    3.90
  10   2  -6  -10.53    4.93
  -4   6  -3   18.39    2.59
   8   3 -15    3.66    3.14
  -7   3 -11    8.02    5.90
   8   1 -19    1.99    3.13
  10   2  -3   -3.64    5.61
   7   4 -14    8.97    2.80
   0   2 -23   27.60    3.30
   4   6  -7   56.33    5.25
   4   2 -23  104.61    8.31
   2   3 -22    3.70    4.19
  -3   3 -19   10.31    2.31
  -9   3  -2   -5.89    4.31
  -3   5 -13   20.34    2.96
   7   1 -21    6.14    5.09
  -6   0 -17   -4.96    5.06
   6   5 -11   26.12    3.12
  10   2  -7   14.64    2.54
   4   5 -15    4.08    5.93
  -9   2  -6   13.15    2.79
   0   5 -16    4.48    5.74
 -10   1  -2   13.86    2.94
  -1   3 -21    7.12    2.30
   8   4 -10   -1.55    6.13
   7   5  -3   53.60    4.79
   7   5  -4    6.49    5.34
   5   4 -18    5.19    4.35
 -10   0  -3    2.85    4.57
  10   2  -2   24.36    2.87
   4   1 -24   40.27    3.86
  -8   0 -12    9.91    2.35
   4   4 -19   -2.10    5.35
  -1   6 -10    6.53    4.90
   1   3 -22    2.61    2.74
   7   5  -2   72.40    5.67
  -5   3 -16   -6.34    4.56
   3   5 -16   30.68    4.86
   9   0 -17   -2.66    4.44
   7   5  -5    3.64    4.72
   1   6 -11    2.34    3.53
   7   2 -20   -0.13    4.88
  10   2  -8    7.33    4.99
  -5   0 -19   67.24    6.43
  -5   5  -9   -0.76    4.30
   3   3 -22    2.81    5.08
   9   3 -11   22.35    2.99
  -9   1  -8   12.24    2.46
   0   1 -24    1.51    4.02
  -3   6  -7    4.58    5.38
  -2   4 -18   -0.04    4.38
  -4   6  -4   -7.06    5.95
   7   5  -1   -0.04    4.42
   8   2 -18    4.43    3.22
  -6   4 -11    5.28    2.13
   7   3 -18   -1.93    4.51
  10   1 -12   27.97    3.34
  -6   3 -14    4.74    4.52
  -2   6  -9   23.70    2.74
   7   5  -6    6.11    5.55
  10   2  -1    9.20    2.60
  -8   4  -3   16.12    2.52
   3   6 -10  126.43   10.87
   0   6 -11    6.45    2.33
   4   6  -8  126.04    8.60
   9   2 -15    4.91    4.10
  -8   3  -8   55.75    5.11
  -7   0 -15   30.96    3.13
   2   4 -20   -4.33    5.23
  10   0 -13   -3.51    4.87
   2   6 -11   34.38    3.74
  -1   4 -19   23.23    3.27
   5   5 -14    3.29    2.36
  -2   0 -23    1.02    4.72
  -6   5  -6   -0.86    4.79
  -7   4  -8   29.87    3.12
   6   0 -23    4.08    4.54
   7   5   0    4.75    3.58
  -7   5   0   12.72    2.48
  -3   0 -22   -9.45    4.82
   1   4 -20    5.93    6.27
  10   2  -9   29.32    3.01
   5   3 -21    4.28    3.46
  -9   3  -3   23.25    3.13
  -3   4 -17   75.27    7.28
  -6   1 -17    6.22    2.08
  -6   2 -16    5.48    3.93
   8   4 -11   19.98    3.01
  -4   3 -18   51.20    5.04
 -10   1  -3   99.99    7.85
   8   0 -20    3.21    4.98
   7   5  -7    7.34    5.06
  -5   2 -18   -8.38    6.12
  -8   1 -12    0.32    3.55
   5   0 -24  -12.34    6.33
   2   0 -25   -6.27    4.93
   6   4 -17    5.05    3.77
  -2   2 -22   17.61    2.86
  10   2   0    2.36    5.36
   6   5 -12    3.69    3.22
 -10   2   0    6.52    4.94
   9   1 -17   52.53    4.59
  -5   1 -19   -0.22    4.90
   6   3 -20    4.26    5.29
  -9   0  -9  185.97   14.89
   3   4 -20    5.13    4.90
   0   3 -22   61.09    5.68
 -10   0  -4   24.33    2.74
  -3   2 -21    2.48    3.30
  -2   5 -15   77.46    6.82
   3   0 -25   -0.65    5.15
   5   6  -2    3.31    4.54
  -4   6  -5   -5.30    5.62
   8   3 -16    4.50    4.38
   9   3 -12    7.56    2.66
   5   6  -3   18.76    2.96
  -7   5  -1    3.92    4.99
   7   4 -15   14.92    2.56
  -1   5 -16   26.47    3.25
  -1   0 -24  -11.13    4.79
   5   6  -1   -0.09    4.51
   2   2 -24    2.90    4.74
  -4   5 -12    2.24    5.72
  -9   2  -7   26.58    3.10
  10   2 -10    2.38    5.39
   5   6  -4   21.70    3.09
   1   5 -17    0.01    3.98
   7   0 -22   -1.60    4.39
   4   6  -9    3.78    7.11
   4   3 -22   23.05    3.32
   2   5 -17    6.94    6.62
  -7   1 -15   23.32    3.40
  -8   4  -4    1.91    3.83
   1   0 -25   48.33    4.75
  10   1 -13    9.28    2.40
   7   5  -8    3.77    4.33
  -2   1 -23   -0.41    4.20
  -8   2 -11   63.92    6.22
  -3   6  -8    5.00    3.56
  -5   6   0  -16.32    5.89
   6   2 -22   -6.64    4.73
  -4   0 -21   -5.93    5.18
   6   1 -23  -10.71    7.00
   5   6   0   -0.31    3.67
  -1   6 -11   -0.63    5.16
  -1   2 -23    2.44    2.10
  -3   1 -22   10.47    7.40
  -5   4 -14    3.62    4.78
   5   2 -23   22.07    3.00
   3   2 -24    6.24    5.24
   1   6 -12   21.89    2.96
   0   4 -20   13.65    2.67
   5   6  -5   -0.73    5.61
  -7   2 -14   26.06    3.02
  -7   3 -12   10.76    2.61
   3   6 -11    9.52    2.77
   4   5 -16    4.65    5.56
 -10   2  -1   27.59    3.10
  10   0 -14   25.87    3.28
   1   2 -24   24.74    2.95
  -9   3  -4    7.13    5.85
   8   1 -20    4.12    4.64
  -5   5 -10   39.42    3.57
   5   1 -24   -2.66    6.96
  -2   6 -10   30.56    3.27
   2   1 -25   32.85    3.46
  -3   5 -14    3.34    6.04
  -7   5  -2   22.27    2.83
   8   4 -12    4.01    3.62
  -6   5  -7    7.46    2.11
  -4   4 -16    4.30    6.62
  -5   6  -1   19.86    2.78
   9   0 -18    2.66    3.02
   2   6 -12   15.70    2.78
  -9   1  -9    0.97    4.81
 -10   1  -4    4.82    6.10
   9   2 -16    1.65    5.40
   0   6 -12   -1.92    5.74
   5   6  -6   14.94    3.09
  -4   2 -20   -0.20    4.98
   3   1 -25    5.76    2.18
   0   5 -17   12.74    2.59
  10   2 -11    1.00    4.90
   7   5  -9   19.51    2.91
   3   5 -17    5.00    3.59
   5   4 -19   -2.05    4.66
   4   0 -25   -5.07    5.96
  -1   1 -24    3.84    3.51
  -4   6  -6   38.01    3.44
  -8   3  -9    5.86    2.16
  -8   0 -13   -3.51    4.47
   5   5 -15   -8.34    5.13
  -7   4  -9    3.88    3.89
   7   1 -22    7.31    6.00
  -6   4 -12   -0.95    4.93
   8   2 -19   14.95    2.62
   1   1 -25   11.44    2.91
   6   5 -13   36.51    3.37
   9   3 -13   35.59    3.48
 -10   0  -5   -4.38    4.89
  -2   3 -21   11.05    2.65
   7   3 -19   11.79    2.62
   4   6 -10    3.18    5.52
   4   4 -20    7.20    4.92
  -4   1 -21   31.04    3.94
  -5   6  -2   16.56    2.71
   7   2 -21    1.87    4.50
  -8   4  -5    4.69    3.21
 -10   2  -2   -5.57    5.05
  -6   0 -18   51.85    4.51
   5   6  -7   37.08    3.81
  10   1 -14   28.72    3.26
  -3   3 -20    2.50    5.00
  -7   5  -3   -6.77    5.20
  -5   3 -17    7.14    6.32
   4   2 -24    4.38    5.41
   0   0 -25   -0.42    4.28
   2   3 -23   -3.15    4.33
  -6   3 -15    5.19    4.96
   9   1 -18    3.64    5.38
  -3   6  -9   23.15    2.96
   7   4 -16    1.88    4.52
   0   2 -24   18.44    3.05
   6   4 -18   -0.22    3.06
  -1   3 -22  -11.09    6.57
  -9   2  -8    4.21    4.13
  -2   4 -19    3.06    4.33
   8   3 -17    0.89    5.41
  -9   0 -10    1.74    4.94
   7   5 -10    3.07    5.99
  -9   3  -5   28.60    3.14
   1   3 -23   29.71    3.36
  10   0 -15   -0.54    4.85
  10   2 -12    0.23    4.91
   8   4 -13   33.69    3.49
   3   6 -12   40.50    4.69
   3   3 -23    5.34    3.96
   4   1 -25   19.02    3.20
  -7   0 -16   -5.76    5.53
  -5   6  -3    4.70    5.62
  -8   1 -13   -4.43    4.95
  -5   0 -20   -1.29    4.73
   8   0 -21   -0.43    4.34
  -1   6 -12    6.47    4.89
   2   4 -21    7.78    2.83
  -4   5 -13    4.11    3.49
 -10   1  -5    4.15    6.17
   1   6 -13    4.31    5.86
  -1   4 -20   77.60    7.60
   5   6  -8    9.95    2.56
  -3   4 -18    5.16    6.82
   5   3 -22   -3.40    5.35
  -6   5  -8   -0.87    4.53
  -4   6  -7    1.87    4.50
   9   4  -4    3.79    2.01
  -2   6 -11    0.44    3.82
  -6   2 -17    2.06    5.24
   9   4  -5    3.11    4.40
  11   0  -5  182.15   15.03
  -2   5 -16   -3.05    5.56
   1   4 -21   16.82    2.94
  11   0  -6   -7.95    6.12
   6   0 -24    7.62    5.66
   9   4  -3    6.09    5.16
   6   3 -21   -2.34    5.67
  -6   1 -18   14.12    2.66
  11   0  -4    1.79    5.07
  -5   5 -11   -5.81    5.58
 -10   2  -3    7.09    2.54
   2   6 -13   -5.39    5.44
   0   1 -25   -0.31    5.56
  -1   5 -17   26.02    3.33
   9   3 -14    5.21    5.55
   9   4  -6   -2.12    4.77
  -8   2 -12   -4.23    5.66
   4   6 -11    0.35    4.44
  -7   5  -4   -0.31    5.52
  -4   3 -19    2.95    4.87
  11   0  -7   61.81    5.78
   2   5 -18    1.24    5.69
   4   5 -17    3.77    4.98
   9   2 -17    8.58    6.40
   1   5 -18    3.45    6.24
   3   4 -21    6.09    5.16
   9   4  -2   15.51    3.03
  -5   2 -19   16.64    2.62
   0   6 -13    0.23    4.93
 -10   0  -6   12.86    2.73
  11   0  -3   26.60    3.16
   6   5 -14    5.79    4.91
   0   7   0    3.87    4.47
  -8   4  -6   38.19    3.59
  -7   3 -13   48.72    4.40
  -9   1 -10   -4.06    4.80
   9   0 -19   55.53    5.25
   0   7  -1   25.82    3.19
   9   4  -7    0.66    4.76
  -5   4 -15    6.17    2.64
   5   0 -25   29.41    4.51
  10   3  -5   -0.68    5.39
  -2   0 -24   17.01    2.84
  -5   6  -4    4.73    3.96
  11   0  -8   -0.01    5.88
  10   3  -4   -2.80    4.19
  -3   0 -23    6.23    2.44
  10   1 -15   32.14    3.72
  -7   1 -16   65.33    5.88
   7   5 -11    9.41    2.60
   7   0 -23    1.69    5.56
  -3   5 -15    5.19    3.70
   5   5 -16    4.35    4.27
  -7   4 -10   35.02    3.62
  -8   3 -10    8.83    7.71
  -5   1 -20    1.89    4.54
  10   3  -6    0.00    4.16
   8   1 -21    2.02    4.05
   9   4  -1   -5.24    4.54
   0   7  -2   15.59    2.52
  -7   2 -15    4.51    5.01
  10   2 -13   15.67    2.83
  11   0  -2    2.01    3.54
  10   3  -3   -4.15    4.90
   5   6  -9    3.26    5.68
   1   7  -1   -2.88    4.72
   1   7   0   18.44    2.73
   0   3 -23   -3.45    5.40
  -1   7   0   19.34    2.96
  -2   2 -23    1.88    4.57
   4   3 -23    3.46    6.31
   6   2 -23    3.81    3.56
  10   3  -7    4.71    4.60
   2   0 -26   50.96    4.59
  -3   2 -22   14.33    2.94
  -9   3  -6    4.87    5.27
  -1   7  -1   21.54    2.95
  11   1  -5    2.01    4.07
   1   7  -2   10.08    2.68
  -3   6 -10    1.99    4.03
   9   4  -8    3.93    4.54
  11   1  -6   -6.74    5.68
   6   1 -24    0.91    5.53
   3   5 -18    1.12    4.55
  -6   4 -13    0.66    4.73
   8   4 -14    2.46    5.65
  11   0  -9    3.36    6.72
  11   1  -4   14.28    2.87
   0   7  -3    1.11    4.54
   0   4 -21   22.69    3.09
  10   3  -2    9.69    2.37
  -4   4 -17   -0.89    4.61
   8   2 -20    2.82    4.15
   3   0 -26    1.23    3.98
   5   2 -24   16.71    2.91
   0   5 -18    5.37    3.64
  10   0 -16   -0.63    4.98
   5   4 -20   -3.41    7.43
   2   2 -25   -5.79    4.80
  11   1  -7   30.08    3.78
   3   6 -13   -4.69    5.15
  -1   7  -2    3.32    2.56
   1   7  -3   17.18    2.79
  -9   4   0   60.70    5.51
  -8   0 -14   43.61    4.05
   7   3 -20   -4.71    5.16
  -4   6  -8   35.79    3.34
  11   0  -1    8.38    5.88
   9   4   0   47.51    4.51
  10   3  -8    7.06    4.83
  11   1  -3    5.15    4.39
  -1   0 -25    3.41    4.76
   7   4 -17    0.03    5.52
 -10   1  -6   -0.17    4.69
  -9   2  -9   -2.95    4.72
  -7   5  -5    6.25    5.87
 -10   2  -4    2.41    3.76
  -4   0 -22   35.36    3.73
   3   2 -25    1.86    4.66
   9   1 -19   -0.51    4.47
   8   3 -18    6.22    6.37
   5   1 -25   41.19    4.69
  -1   2 -24   28.16    3.56
  11   1  -8   13.76    3.04
  -2   1 -24    0.28    4.50
   1   0 -26    5.46    4.68
  -3   1 -23   -0.10    5.90
  -5   6  -5    4.64    4.59
  -6   5  -9   23.00    3.25
  10   3  -1  -10.72    4.97
   7   1 -23   29.89    3.28
   0   7  -4   -2.66    5.07
   9   4  -9    2.99    5.03
   4   6 -12   10.66    2.97
  -1   6 -13   27.35    3.09
   4   4 -21   20.18    4.14
  11   0 -10    2.92    3.55
   9   3 -15   25.50    3.06
   7   2 -22   -7.10    5.01
  -9   0 -11    5.86    4.41
  -1   7  -3    3.43    4.79
   1   2 -25   19.44    3.23
  11   1  -2   30.36    3.09
   1   7  -4   -4.58    4.67
   6   4 -19    1.75    5.20
   1   6 -14    8.26    6.29
   7   5 -12   -5.32    5.86
  -2   6 -12   67.52    5.83
   6   6  -3   -6.71    6.40
   5   6 -10   -2.36    5.38
  -4   2 -21    1.06    4.57
  10   3  -9    4.26    4.90
   6   6  -2    0.37    5.81
   2   1 -26    2.33    4.44
   6   6  -4    3.67    5.59
  -6   3 -16    6.87    2.26
  -8   4  -7   64.95    5.78
   2   7  -1    6.74    2.36
   2   6 -14    7.76    5.41
  11   0   0    6.33    4.81
 -11   0   0   -3.76    4.70
  -9   4  -1    3.87    4.53
  11   1  -9   29.39    3.43
   2   7   0    4.59    5.18
 -10   0  -7    3.99    3.95
   2   7  -2    5.30    3.81
   8   5  -4   -8.06    5.46
  10   2 -14    9.13    6.40
  -2   7   0    0.41    3.95
   6   6  -1   -1.43    4.97
   8   5  -3  161.01   13.33
  -4   5 -14    4.75    5.84
   6   5 -15   13.03    2.63
   3   1 -26    5.18    4.42
  -5   3 -18   -6.59    4.76
   4   0 -26   97.54    8.12
   8   5  -5   41.82    4.14
   6   6  -5    3.22    5.80
  10   1 -16   -6.74    6.43
  -2   3 -22   46.48    4.13
  -5   5 -12    4.56    5.14
  10   3   0   13.43    2.67
 -10   3   0    8.01    5.61
  -2   7  -1    1.53    4.37
  -8   1 -14    2.37    2.91
   0   7  -5    7.10    4.86
   9   2 -18    4.87    4.11
  -6   0 -19    3.65    2.88
  11   1  -1   12.05    2.45
  -1   7  -4   13.67    2.67
   2   7  -3    1.46    3.93
   8   5  -2   11.06    2.83
  -1   1 -25    1.61    5.66
   1   7  -5    8.38    2.63
   0   6 -14   25.12    3.34
   8   0 -22   -2.96    6.06
   9   4 -10    2.77    6.01
  -3   3 -21    9.41    6.57
  -4   1 -22    0.11    6.59
   8   5  -6   -4.90    5.71
   6   6   0   -1.03    6.40
  -6   6   0   10.73    2.36
  11   0 -11    1.09    4.67
  -2   4 -20   25.12    2.98
   1   1 -26   38.75    3.72
   4   2 -25   -6.50    5.60
  -7   0 -17    7.14    6.02
   6   6  -6   -0.52    4.53
  -9   3  -7   85.40    7.35
   2   3 -24   13.23    2.74
  10   3 -10    4.77    4.71
  -2   5 -17    8.39    2.72
  -8   2 -13   53.98    4.86
   4   5 -18   10.06    7.43
  -2   7  -2   12.76    2.87
   8   5  -1   22.14    3.20
   8   4 -15   25.59    3.57
  -7   5  -6   47.16    4.67
  11   1 -10   61.48    6.14
  -7   4 -11   33.71    3.79
   2   7  -4   -7.56    6.40
  -9   1 -11    8.61    2.42
   5   5 -17    1.89    4.75
   9   0 -20   -1.11    5.30
 -10   2  -5   53.27    4.92
  -5   6  -6   10.29    2.64
  -3   6 -11    2.42    5.74
  -8   3 -11   -6.48    6.97
   2   4 -22    0.96    5.20
   6   3 -22   -8.52    6.78
  -1   5 -18   26.85    3.46
   8   5  -7    6.51    2.53
  -3   4 -19   10.54    2.81
  -9   4  -2    3.13    4.23
 -11   0  -1   39.15    3.51
  -1   3 -23    5.29    5.73
  -4   6  -9   -4.41    5.48
   2   5 -19    2.10    5.53
   5   3 -23   15.05    3.40
   3   3 -24    1.90    4.75
  -6   6  -1    4.72    4.66
  -7   3 -14    6.51    5.56
  10   0 -17    0.75    4.37
   0   0 -26   -0.51    4.52
 -11   1   0   -1.76    4.66
  11   1   0    5.00    5.53
  -1   4 -21   33.71    3.61
   1   5 -19   -6.85    5.35
 -10   3  -1    9.47    2.65
 -10   1  -7   39.99    3.83
  -6   2 -18    0.95    5.15
   1   3 -24    3.12    6.27
  -1   7  -5   38.01    3.69
   3   6 -14    6.47    6.08
   1   7  -6   15.74    2.92
   0   2 -25    3.16    4.57
   5   6 -11   16.67    3.48
   6   6  -7    7.55    5.23
   0   7  -6   13.07    2.73
  -5   0 -21    7.29    2.31
  -8   5   0   38.49    3.36
   8   5   0   30.78    3.42
  -2   7  -3    7.16    4.91
   4   1 -26   -2.38    5.47
   1   4 -22   36.99    4.22
  -3   5 -16   -1.15    3.26
  -5   4 -16   21.42    3.10
   7   5 -13    2.25    5.08
   4   6 -13    3.05    5.14
   2   7  -5    4.72    3.54
  -6   1 -19   17.49    3.11
   6   0 -25    3.06    5.14
   3   4 -22   14.89    3.58
   9   4 -11    3.56    7.51
   8   1 -22   -4.83    5.31
   9   3 -16    0.03    5.67
   8   5  -8   18.86    2.69
  11   0 -12    2.26    5.10
  -6   5 -10   -5.10    4.96
  -9   2 -10   15.18    2.72
  -4   3 -20   56.97    5.36
  11   1 -11   -2.40    5.50
  10   3 -11   -4.24    4.56
   7   4 -18  -15.10    6.43
  -6   4 -14    5.21    4.45
  10   2 -15   40.28    3.98
  -7   2 -16    7.02    5.40
   3   5 -19   -3.08    4.93
  -7   1 -17   30.97    3.64
  -6   6  -2    5.30    5.75
  -5   2 -20   -2.04    5.70
   8   2 -21   13.71    2.68
   7   0 -24   -2.41    5.51
  -8   4  -8    7.32    7.10
   8   3 -19    5.94    6.73
   9   1 -20    0.03    5.69
  -1   6 -14    2.72    4.84
  -8   5  -1    3.03    5.11
  -2   7  -4   24.34    3.11
  -2   6 -13   12.28    2.70
   6   6  -8   -6.96    5.44
 -11   1  -1    3.83    5.16
   7   3 -21    1.92    4.82
   5   4 -21    1.90    8.64
 -11   0  -2    2.49    3.89
 -10   0  -8   21.47    2.98
   1   6 -15   -0.99    4.84
  -9   4  -3    1.71    6.78
  11   2  -5   -5.55    4.76
   2   7  -6    9.35    2.75
  11   2  -6    8.83    2.73
  10   1 -17   47.87    4.62
   0   5 -19   28.08    3.43
 -10   3  -2    2.23    5.04
   3   7  -1    0.71    6.20
   6   2 -24   -0.65    5.16
   0   1 -26    4.31    2.44
  -1   7  -6    1.57    4.47
   5   0 -26    3.08    5.19
   3   7  -2    3.89    3.71
  -8   0 -15    1.69    3.81
   1   7  -7    5.25    6.28
   6   5 -16   -5.81    5.77
  11   2  -4    3.43    5.48
  -4   4 -18    7.56    5.24
   2   6 -15    0.29    4.68
   4   3 -24   16.29    3.01
  -9   0 -12    3.30    3.98
   0   7  -7    0.16    5.21
  -5   1 -21    4.79    4.73
  -3   7   0    2.24    5.08
   8   5  -9   27.16    3.35
  -5   6  -7   19.81    3.31
   3   7   0    5.12    2.25
  11   2  -7    0.98    5.30
  -7   5  -7   -8.29    5.98
   3   7  -3   15.07    2.96
   6   4 -20   -0.66    5.18
  11   2  -3    3.44    5.50
   6   1 -25    6.53    5.35
 -10   2  -6   -1.79    4.73
   0   4 -22   21.23    3.03
  -3   0 -24    4.00    4.69
  -9   3  -8    1.56    4.45
   0   3 -24    8.31    5.82
  -2   0 -25    3.66    2.14
   8   4 -16   -4.08    5.44
  -3   7  -1    6.19    5.89
  -6   6  -3    2.17    3.53
  11   1 -12   14.25    2.97
   9   4 -12    2.41    3.25
   9   2 -19    3.93    5.29
  -5   5 -13    4.27    3.39
   5   6 -12    0.16    5.25
   5   2 -25   11.78    2.90
   3   7  -4    2.49    5.90
  -2   2 -24   26.21    3.61
  11   2  -8    2.89    4.35
  10   3 -12   11.48    2.76
  -3   2 -23   -3.56    5.17
  11   0 -13    3.40    7.05
   0   6 -15   10.26    2.61
  -4   5 -15   -0.31    5.43
   7   2 -23   -6.55    5.26
  -4   6 -10    6.45    4.91
  -8   5  -2   16.37    2.83
   4   4 -22    2.15    5.66
   7   1 -24   -0.10    6.21
  -2   7  -5    6.48    4.93
  11   2  -2   26.71    3.24
   6   6  -9    4.72    3.19
   7   5 -14   15.01    2.69
  -3   6 -12    5.11    5.66
   2   0 -27   -1.14    5.44
   2   7  -7    0.29    4.74
  -3   7  -2   -1.35    4.60
 -11   1  -2   -3.01    4.44
   2   2 -26    3.12    5.26
  -6   3 -17    3.39    4.09
  10   0 -18    2.21    3.37
 -10   1  -8   -4.71    6.15
   3   0 -27    1.69    5.90
  -7   4 -12   10.96    3.13
   3   7  -5   -0.66    5.23
   4   6 -14   -1.49    5.17
   8   5 -10    0.34    3.84
  11   2  -9    1.12    4.82
  -1   7  -7    2.43    4.64
  -8   1 -15    4.60    2.29
   5   1 -26  101.03    8.39
   3   6 -15    0.64    5.06
   5   5 -18   -0.74    3.65
  -9   4  -4    1.34    5.64
 -10   3  -3    1.01    2.73
  -9   1 -12   10.00    2.45
 -11   0  -3   -5.15    4.57
   3   2 -26   20.03    3.52
   1   7  -8    3.96    5.33
  -8   3 -12  116.55    9.16
  -4   0 -23    3.13    5.27
   4   5 -19   27.56    3.33
  10   2 -16    7.06    4.76
   8   0 -23    3.40    4.10
  -8   2 -14   -3.29    5.56
   9   0 -21   -6.47    4.76
   9   3 -17   13.41    3.07
   0   7  -8   10.10    2.59
  -1   0 -26    3.89    3.80
  -5   3 -19   10.28    2.89
  11   2  -1    4.99    3.63
  -3   1 -24   17.20    2.89
  -1   2 -25   -3.99    4.98
  -2   1 -25    2.57    4.03
  -6   6  -4    0.16    5.32
  -2   5 -18   13.32    2.83
  -4   2 -22   -3.24    5.08
  -6   5 -11    1.10    6.16
  -3   7  -3    1.89    4.94
   1   0 -27   17.05    3.60
   1   2 -26   21.38    3.35
  11   1 -13    5.87    4.37
  -8   4  -9   41.88    4.14
  -8   5  -3   -9.24    5.16
   3   7  -6    3.71    4.50
  -5   6  -8   -1.40    6.00
  -7   3 -15    6.94    6.56
  -9   2 -11    4.11    3.32
  11   2 -10    4.09    6.15
  -6   0 -20    3.28    4.71
  -2   7  -6   -7.77    4.39
   9   4 -13    4.55    4.59
  10   3 -13    4.25    5.67
   2   5 -20    4.74    5.45
   6   6 -10   16.05    3.07
  -7   0 -18   -6.26    5.14
  -1   5 -19    5.57    5.52
  -2   3 -23   15.25    3.02
  -2   4 -21   -1.10    4.99
   2   7  -8    8.59    2.67
   7   4 -19   16.93    2.97
   2   1 -27   -0.42    5.59
  11   0 -14   -3.07    5.90
  -7   5  -8   30.93    3.46
   6   3 -23    3.95    6.60
  -3   3 -22    7.75    5.43
   4   0 -27    3.23    4.78
  10   1 -18    0.72    4.55
   1   5 -20    4.11    6.16
  -3   5 -17    6.08    5.31
 -10   0  -9    4.90    4.93
   3   1 -27    0.72    4.56
  11   2   0    6.03    2.47
   8   5 -11  -10.62    5.36
 -11   2   0   -3.92    5.86
 -10   2  -7    3.73    4.53
  -3   4 -20   95.55    8.89
   5   6 -13   22.78    2.98
  -1   6 -15    3.39    4.16
  -5   4 -17    6.94    5.38
  -2   6 -14    1.90    4.97
 -11   1  -3   -0.42    5.61
   2   4 -23   24.55    3.05
   5   3 -24    2.90    4.45
   8   3 -20   17.51    2.95
   6   5 -17    5.26    3.71
   4   2 -26    6.77    2.52
  -6   4 -15   -0.42    5.61
  -4   1 -23   13.08    3.14
   2   3 -25    6.10    5.32
   8   1 -23   11.35    2.74
   1   6 -16   -0.61    4.77
  -3   7  -4    3.59    5.13
   9   1 -21    4.73    3.95
  -6   2 -19    2.06    4.38
  -1   7  -8    0.46    6.85
  -1   1 -26    9.57    2.48
   2   6 -16   -0.96    4.42
   1   7  -9   23.83    3.29
  -9   3  -9   -0.61    4.77
 -10   3  -4   -0.26    5.10
   8   2 -22    2.06    4.38
   3   5 -20   25.18    3.41
  -1   4 -22    4.74    2.39
   3   7  -7  -11.50    5.31
   8   4 -17    7.11    4.84
  -9   4  -5   35.94    3.61
 -11   0  -4   -1.61    5.28
   3   3 -25   53.48    4.88
   7   5 -15   10.90    7.67
  11   2 -11    1.57    4.67
  -4   6 -11   -2.64    4.27
   1   1 -27    1.91    5.00
  -6   6  -5    7.76    2.65
  -1   3 -24   -5.29    6.04
   1   4 -23    0.39    4.23
   3   4 -23   16.18    3.23
   0   7  -9    4.29    2.87
  -7   2 -17    0.58    5.18
  -9   0 -13   22.37    3.19
   7   3 -22    2.25    2.80
  -8   5  -4   -0.61    4.79
  -6   1 -20   45.60    4.67
   1   3 -25    2.27    5.33
   6   0 -26   27.40    3.49
  -5   0 -22    1.73    4.02
  -7   1 -18   32.66    3.77
   9   2 -20   -1.12    5.05
   4   7  -2    6.99    5.43
  11   1 -14    3.11    5.40
  -2   7  -7    1.07    2.55
   4   7  -1    6.73    2.56
   5   4 -22    3.71    3.95
  -4   3 -21    2.27    5.33
 -11   2  -1    3.96    3.86
   4   7  -3    1.92    5.02
  -3   6 -13    1.96    6.33
   6   6 -11   11.93    2.82
   4   1 -27    0.93    5.50
  -5   5 -14   18.46    3.08
   7   0 -25   25.23    3.26
   2   7  -9    9.78    3.02
 -10   1  -9   -2.46    5.24
   4   6 -15    6.50    5.66
   0   5 -20   -5.85    4.96
   0   6 -16   -3.47    5.71
  -8   0 -16    9.25    6.58
  10   2 -17   10.30    2.68
  10   0 -19    5.32    5.31
   0   2 -26    8.90    6.34
   6   4 -21   35.49    3.81
   0   0 -27    0.54    3.51
  10   3 -14   25.45    3.37
  -4   7   0    3.08    3.80
   4   7   0    2.78    5.11
   7   6  -3   39.74    3.83
   7   6  -4   15.07    2.93
   9   4 -14    6.34    1.95
  -3   7  -5   -1.46    4.74
  -5   2 -21    0.23    4.89
   4   7  -4    5.95    2.61
   7   6  -2   -0.43    5.68
  -4   4 -19   22.62    3.47
   8   5 -12    2.93    4.50
  11   0 -15   16.54    3.19
   3   6 -16   -4.52    4.79
   9   3 -18    6.91    2.21
   7   6  -5   -0.29    6.46
  -4   5 -16   -5.52    5.30
   6   2 -25    3.33    6.21
  -5   6  -9    3.00    2.80
   3   7  -8    5.69    5.62
  -7   4 -13    8.67    8.20
 -11   1  -4    4.78    2.01
  -4   7  -1    2.63    5.67
  11   2 -12    0.62    6.51
   7   6  -1   23.60    3.44
  10   4  -5   -2.98    5.51
   4   7  -5   21.21    3.00
   5   5 -19   -2.98    5.51
  10   4  -4    1.75    4.06
   4   3 -25    3.80    4.61
   7   6  -6   -3.34    5.21
  -8   4 -10   68.10    6.69
  -8   3 -13   48.87    4.39
  -7   5  -9    6.41    6.20
  -1   7  -9   13.46    2.80
  10   4  -6    0.77    6.06
  -9   1 -13    3.55    2.38
  -6   5 -12    2.10    4.46
   7   2 -24    3.65    5.22
   1   7 -10    2.84    2.50
   5   0 -27   43.64    3.94
   5   6 -14    2.84    2.50
  10   4  -3    5.91    6.42
 -10   3  -5    4.92    2.40
   6   1 -26    2.33    6.64
  -6   6  -6   -1.13    5.12
   0   4 -23   -4.35    5.70
  -5   1 -22    5.89    2.53
   4   4 -23   20.23    3.44
   4   5 -20   -4.86    5.92
   7   6   0    6.92    6.01
   9   0 -22    5.02    5.04
  -7   6   0   -4.52    6.20
  10   4  -7    2.96    4.54
   7   1 -25    2.34    6.66
 -10   2  -8    1.24    4.38
 -11   0  -5   22.21    3.19
 -11   2  -2   10.10    2.54
  -4   7  -2   -5.57    5.34
  -9   4  -6   20.46    3.41
  -8   5  -5   20.00    3.45
  -8   1 -16   15.36    2.70
  -6   3 -18   -2.69    4.35
   0   7 -10   -2.49    5.31
  10   1 -19    3.82    4.63
   0   1 -27    8.64    2.39
  -8   2 -15   10.36    2.57
   5   2 -26   -1.79    5.90
   7   6  -7   34.69    3.62
  10   4  -2   18.94    2.95
   4   7  -6   -0.02    3.59
   0   3 -25    2.81    5.17
  -2   7  -8   19.17    3.12
  -9   2 -12   10.42    7.38
 -10   0 -10   -0.90    7.13
  -3   7  -6    6.45    6.25
   8   0 -24   -3.71    4.92
   2   7 -10   33.58    3.84
  11   1 -15   22.64    3.31
   6   6 -12  -12.77    5.89
   7   4 -20   -0.27    5.22
   7   5 -16   24.80    3.68
  10   4  -8   13.17    2.51
  -3   0 -25   -1.99    5.08
   6   5 -18    2.82    5.19
  -3   2 -24   16.78    3.20
  -2   5 -19    5.76    5.70
   3   7  -9    3.94    3.63
  -2   2 -25   -0.63    4.89
  -2   6 -15    1.29    5.90
  -9   3 -10   -1.65    5.40
  -2   0 -26   -3.21    4.66
  -7   6  -1    1.14    6.39
   8   4 -18   -4.04    6.03
  10   3 -15    0.08    5.54
   8   5 -13    3.17    5.51
  -1   6 -16    1.29    5.91
  11   2 -13    6.47    6.27
  -7   3 -16    9.45    2.46
  -4   6 -12   35.60    3.82
  10   4  -1    5.06    5.08
  -4   7  -3    8.01    5.61
   1   6 -17   -5.81    4.42
  -5   3 -20    4.36    4.37
   8   3 -21    3.99    2.00
   2   6 -17    4.20    3.55
   9   4 -15    1.45    5.38
   5   1 -27   -3.54    5.83
   7   6  -8   12.61    2.52
   2   5 -21    9.78    6.97
  11   0 -16    2.48    4.87
   4   7  -7   13.73    3.07
   2   2 -27    5.98    6.50
  -3   5 -18   37.97    4.04
  -1   5 -20    1.30    5.92
   2   0 -28   -0.95    6.02
   9   1 -22    2.36    6.73
   9   5  -4   12.82    2.88
  10   4  -9   13.31    2.83
 -11   1  -5    5.75    4.17
  10   2 -18   14.29    2.56
   3   0 -28   -9.42    6.18
   9   5  -5   15.53    2.83
  11   3  -5   10.80    2.99
   3   2 -27   10.70    3.43
  -6   4 -16    3.70    5.29
  11   3  -6   -5.79    5.94
   1   5 -21    3.03    6.06
   6   3 -24    2.48    4.88
   9   5  -3    4.58    3.79
   4   6 -16   11.26    2.98
  -4   0 -24   -5.48    4.81
  11   3  -4   -7.73    4.93
 -11   2  -3   -7.03    5.58
  -7   0 -19    2.69    5.78
  -5   6 -10   -3.75    4.97
 -10   1 -10    5.29    4.22
   9   5  -6    5.36    3.60
  -5   4 -18   -7.55    5.82
  12   0  -6   65.23    5.93
  -4   2 -23   13.62    3.17
  -1   7 -10   -3.40    5.31
  -3   6 -14    4.70    3.16
  -7   6  -2   -1.97    6.47
  11   3  -7   15.92    2.85
  12   0  -5    3.85    2.80
 -10   4   0   -1.82    5.99
  -2   4 -22    0.23    5.01
  10   4   0    3.24    2.81
   8   1 -24    0.23    5.01
   8   2 -23    4.30    2.29
   1   7 -11    3.08    7.25
  -6   0 -21    5.26    4.50
  -6   6  -7    4.59    5.38
   9   2 -21    1.97    5.17
  10   0 -20    6.27    2.68
   3   5 -21    2.46    4.91
   9   5  -2   -4.63    4.90
  12   0  -7    1.07    3.21
  -3   1 -25    9.85    2.54
  -1   2 -26   -6.69    5.90
 -10   3  -6    1.46    5.42
  11   3  -3    6.49    4.94
  -9   0 -14   -5.15    5.18
  12   0  -4   45.12    4.09
  -3   4 -21   10.08    2.75
  -8   5  -6   -0.12    4.67
  -1   0 -27   -5.18    6.54
  -3   7  -7   13.51    2.54
   9   3 -19    2.64    5.82
   9   5  -7   -5.83    5.97
  -4   7  -4    7.42    6.40
  -2   1 -26    5.60    4.88
   0   6 -17   -4.99    4.56
  -5   5 -15   -3.26    4.72
   7   6  -9    5.03    3.84
   1   2 -27    5.39    4.06
   5   3 -25   23.95    3.17
  11   3  -8    1.27    4.46
   3   6 -17   11.80    2.74
  -2   3 -24    3.38    4.99
  -3   3 -23   14.14    3.18
  -2   7  -9    3.39    2.69
 -11   0  -6   -6.03    5.12
  12   0  -8   -1.00    4.60
   2   4 -24    1.79    4.16
  -9   4  -7   15.81    3.11
  10   4 -10    7.74    5.37
   5   6 -15   -3.25    4.72
  -7   5 -10    0.75    4.76
   3   7 -10   17.97    3.09
   7   3 -23   12.00    2.96
   0   7 -11    6.15    4.60
   1   0 -28   -3.94    5.58
   4   7  -8   -9.81    7.16
  -6   2 -20    4.25    3.59
   9   5  -1    3.38    5.00
   6   6 -13    3.22    5.58
   2   7 -11    2.27    4.09
  11   3  -2   -2.19    5.72
  12   0  -3   -4.81    5.52
  -7   2 -18   20.70    3.51
  -8   4 -11    1.99    5.20
  11   1 -16    8.39    6.01
  11   2 -14    2.08    6.08
   4   0 -28   -0.01    4.00
   2   1 -28   37.12    4.39
   6   4 -22    3.67    3.58
  -1   4 -23    6.90    2.41
   2   3 -26   12.08    2.92
   5   4 -23    2.45    2.88
   3   1 -28    7.53    5.95
   4   2 -27   24.20    3.77
 -10   2  -9   19.77    3.18
   3   4 -24    5.78    4.23
   9   5  -8   -6.33    5.73
  -7   4 -14    2.45    4.96
  12   0  -9   -1.59    4.92
  -6   5 -13    7.01    6.18
 -10   4  -1    3.14    5.62
  -4   1 -24   20.42    3.38
   8   5 -14    0.52    5.42
  11   3  -9   -3.87    5.04
   1   4 -24    4.20    6.50
   0   5 -21   -5.63    4.89
  -8   0 -17    0.52    5.42
  -7   1 -19   -7.41    7.38
  -4   5 -17   29.96    3.50
  -7   6  -3   56.99    5.04
   3   3 -26   -3.87    5.05
   5   5 -20   -1.42    5.85
  10   3 -16   -4.94    5.57
  12   1  -6   -1.77    5.53
  12   1  -5   -0.37    5.36
  12   0  -2   15.10    3.51
  -6   1 -21   -9.88    5.48
  -8   3 -14   24.46    3.56
  12   1  -7   -3.01    5.13
  -9   5   0    9.32    2.73
  10   1 -20   15.75    3.69
   9   5   0    9.35    2.56
   7   0 -26    0.69    4.82
  11   3  -1    6.51    5.01
   7   5 -17    3.51    5.95
   6   0 -27   -6.89    6.00
  -1   3 -25   22.61    3.15
   9   4 -16    8.27    6.55
  12   1  -4    3.51    5.96
  -9   1 -14    3.51    5.96
   5   7  -2    4.05    5.71
  -4   7  -5    0.87    4.12
  -4   3 -22    5.95    2.55
   5   7  -3    4.22    5.14
 -10   0 -11   -4.43    6.68
 -11   2  -4    5.29    4.57
  -4   4 -20    5.10    6.59
  -1   1 -27   -4.42    5.34
   7   6 -10    0.34    6.00
  10   4 -11    5.99    5.29
  11   0 -17   61.51    6.10
 -11   1  -6    2.64    4.31
   5   7  -1   -0.37    5.38
   1   3 -26    2.46    4.99
  12   1  -8    4.76    4.87
  -5   0 -23   -6.91    6.01
  12   0 -10    4.57    6.80
   9   5  -9   -1.60    4.96
   5   7  -4  -10.97    5.99
   1   1 -28    1.58    6.36
   4   7  -9    4.41    4.50
   9   0 -23    4.59    5.49
   4   5 -21   16.23    3.00
  11   3 -10   -2.67    6.82
  -9   2 -13    2.46    4.99
  -9   3 -11   27.47    3.58
  12   1  -3    3.00    4.72
   8   4 -19    7.60    6.01
   6   5 -19   20.59    3.00
   6   2 -26   -3.20    5.75
  -4   6 -13   -5.51    7.12
  -5   2 -22   30.31    3.77
  -3   7  -8   -0.72    5.05
   4   1 -28    3.00    6.21
  -6   6  -8   -2.14    5.25
  -1   7 -11    5.84    5.88
  -5   7   0    5.84    4.27
   5   7   0    3.36    5.08
  12   0  -1   -3.02    5.17
   7   4 -21    6.72    5.95
   7   2 -25    1.33    3.59
   5   7  -5   25.71    3.34
   1   7 -12   -3.20    5.77
  -2   6 -16   60.17    5.38
  -8   5  -7    7.26    5.72
 -10   4  -2   22.77    3.47
 -11   3   0   18.28    2.92
  12   1  -9   22.41    3.56
  -9   5  -1    6.92    5.40
  -8   2 -16    2.30    5.63
   3   7 -11    5.56    2.25
  10   2 -19   22.28    3.61
  11   3   0    9.38    7.37
   0   2 -27   15.30    3.00
 -10   3  -7   -1.61    4.98
  -5   6 -11   10.65    3.23
  -1   6 -17   -6.07    7.34
  -8   1 -17   12.60    2.74
   4   4 -24    2.13    4.65
  -7   6  -4    4.96    5.84
  -2   7 -10    5.86    4.29
   4   3 -26   16.28    2.84
  12   1  -2    7.43    2.74
   2   6 -18   20.53    3.11
   0   0 -28    6.03    6.70
   1   6 -18   -0.37    5.42
  11   2 -15    6.74    7.22
   4   6 -17   15.87    2.92
  -5   7  -1   -0.01    5.75
  12   0 -11   -8.74    5.93
  -6   3 -19    2.67    4.34
   7   1 -26   18.47    3.29
   2   7 -12   -3.58    5.46
 -11   0  -7    4.27    3.00
   6   6 -14   11.10    2.95
   8   0 -25   -6.07    4.59
   0   7 -12    0.35    6.06
   8   3 -22    3.08    2.94
   0   4 -24    4.77    2.11
   6   1 -27   20.05    3.38
  -9   4  -8   -9.83    6.40
   9   5 -10    8.36    6.62
   5   7  -6    1.89    2.88
 -10   1 -11   13.80    2.81
  11   3 -11   28.85    3.57
  11   1 -17   -2.52    6.40
  -2   5 -20    0.35    4.50
   5   0 -28   -4.30    4.77
  10   4 -12   14.23    3.28
  12   1 -10   -6.27    6.65
  -5   1 -23    9.27    7.84
   7   6 -11   42.46    3.98
  -4   7  -6    6.06    5.36
  -7   3 -17    5.35    6.16
   5   6 -16    3.56    6.04
  -3   6 -15    0.70    4.89
   8   5 -15   -5.73    4.98
 -12   0   0   14.21    2.83
  12   0   0    6.96    5.43
   9   1 -23    1.24    3.24
  10   0 -21    4.28    5.21
  -7   5 -11   15.78    3.14
   5   2 -27   -1.27    6.75
   9   3 -20    4.04    3.78
   4   7 -10   -0.73    5.11
   2   5 -22   -1.63    5.03
  12   1  -1   14.21    3.17
  -5   7  -2   -2.34    4.24
  -3   5 -19    7.52    5.18
 -11   3  -1    1.79    4.28
  -9   5  -2    6.98    5.45
   9   2 -22   10.65    2.84
  -6   4 -17    4.82    7.61
 -11   2  -5    7.53    5.18
  10   3 -17   -6.48    5.87
   3   6 -18    2.32    5.69
  -1   5 -21   -0.19    4.83
   0   3 -26   11.59    3.16
   5   7  -7   11.37    2.80
 -10   4  -3    8.90    2.86
 -10   2 -10    1.61    5.00
  -5   3 -21   -8.12    6.57
   0   6 -18   27.02    3.52
  -8   4 -12   -1.64    6.50
   1   5 -22    5.62    2.33
  12   0 -12    1.42    5.62
  -5   5 -16    5.38    6.22
   8   2 -24   -4.70    6.02
  -9   0 -15    8.85    2.59
   0   1 -28    5.93    2.80
   9   4 -17    6.47    5.72
   6   3 -25    1.24    6.19
  -3   7  -9    6.11    5.40
  -5   4 -19   -1.45    4.35
  -7   6  -5   -0.01    5.82
  -3   2 -25   -0.19    4.85
  12   1 -11   21.21    3.62
   3   5 -22   -2.36    5.92
 -11   1  -7   11.02    2.91
   9   5 -11    4.49    6.15
   8   1 -25   -9.58    6.75
  11   0 -18    6.30    4.76
  -3   0 -26    5.05    4.25
  11   3 -12    3.80    2.75
  -2   2 -26   -2.54    6.47
  -6   5 -14    3.07    2.61
   7   5 -18   -3.80    6.11
   3   7 -12    7.93    5.56
  -6   6  -9   -2.18    5.35
   5   1 -28    3.42    5.19
 -12   0  -1    1.26    4.64
  -7   0 -20    5.95    6.00
  -5   7  -3    3.97    4.90
  -2   0 -27    5.06    4.26
 -12   1   0    6.90    2.10
  12   1   0   -5.98    5.66
  -1   7 -12   -0.92    5.77
  10   1 -21   10.66    7.11
  -8   5  -8   -1.10    6.32
   7   3 -24    3.43    5.20
  -7   4 -15    7.59    6.66
  10   4 -13   10.75    2.61
   1   7 -13  -10.52    5.30
   7   6 -12   12.67    3.02
  -2   4 -23   -0.56    6.09
  11   2 -16   -2.92    6.19
   5   7  -8    0.70    7.67
   2   2 -28   13.52    2.91
  -4   7  -7    6.15    5.43
   6   4 -23   -0.19    4.87
  -2   7 -11    2.17    4.75
   3   2 -28    0.89    5.92
  -3   4 -22   19.36    3.47
 -11   3  -2    0.35    6.16
 -10   3  -8   -5.64    6.00
   5   5 -21    3.68    3.14
 -10   0 -12   -1.28    5.45
  -9   5  -3   -4.73    6.07
  -6   0 -22    9.79    7.08
  -4   2 -24    7.62    5.25
  -8   3 -15   10.09    2.81
   3   0 -29    2.36    3.99
   5   3 -26    1.44    5.67
   8   6  -4   16.09    2.99
  -4   0 -25  -14.56    6.19
  -4   5 -18    6.89    6.10
   2   0 -29    1.44    5.68
   2   7 -13    2.35    5.76
   8   4 -20    5.44    6.27
  -7   2 -19   -6.74    6.48
  -9   3 -12   -1.11    6.35
   8   6  -3    1.98    5.42
   6   6 -15    3.80    5.56
  -4   6 -14   14.57    3.04
   4   7 -11   -1.65    5.11
   5   4 -24   13.56    2.92
  12   2  -6   -1.28    5.46
   8   6  -5    4.90    5.01
   2   4 -25    4.54    6.21
  12   1 -12    3.08    4.85
  12   2  -5   -2.20    5.39
  -5   6 -12    6.54    5.79
  12   0 -13   -2.20    5.39
  -9   1 -15    5.99    6.04
 -11   0  -8    2.90    5.50
  10   2 -20    0.89    5.95
  -6   2 -21   -4.75    6.09
   8   6  -2    0.17    5.27
   6   5 -20   -0.74    5.20
  12   2  -7   27.66    3.65
   0   7 -13   11.09    7.41
  -9   4  -9   29.10    3.63
  -8   0 -18    1.99    5.43
 -10   4  -4    1.27    4.68
  -3   3 -24    7.82    6.18
   0   5 -22    0.36    4.59
  -9   2 -14   -0.01    5.88
  12   2  -4    1.44    5.69
  11   1 -18   -5.86    6.57
  -2   3 -25    6.01    4.39
   8   6  -6    3.63    6.16
  -1   2 -27   -2.39    5.99
  -3   1 -26  -11.33    6.18
   8   5 -16   11.85    2.51
   9   5 -12   -5.49    5.45
   3   4 -25    1.81    6.03
  -5   7  -4    0.17    5.29
 -11   2  -6    2.82    3.55
  11   3 -13  -10.43    6.25
  -1   4 -24   -5.87    6.58
  12   2  -8   22.26    3.31
  -7   1 -20    6.75    5.20
 -12   1  -1    8.39    5.96
   9   0 -24   -7.50    5.91
  -2   6 -17   38.84    4.09
   4   6 -18    2.00    5.44
  -2   1 -27    2.55    5.17
   8   6  -1   -6.23    6.29
   1   2 -28   26.34    3.68
  -7   6  -6    9.80    2.41
   7   4 -22    1.09    5.37
   4   5 -22   -1.47    6.08
  -1   0 -28   -3.12    5.34
 -12   0  -2    1.27    4.70
  12   2  -3   10.38    2.79
   1   4 -25    8.05    5.63
   5   7  -9   -1.48    6.08
   5   6 -17   25.68    3.73
   2   3 -27    2.55    5.18
   4   2 -28   -2.57    5.06
   7   0 -27   -2.03    6.34
   8   6  -7   20.51    3.06
  -4   4 -21   21.72    3.69
  -1   6 -18   -1.11    4.84
   4   0 -29    2.19    4.80
   2   6 -19    7.87    6.22
   1   0 -29   35.11    4.18
 -10   1 -12    4.93    6.56
  10   3 -18   13.65    3.39
  -3   7 -10   22.23    3.18
   3   3 -27    3.66    4.57
  -7   5 -12   -0.38    5.58
  -6   1 -22   15.06    3.31
   1   6 -19    0.90    7.31
  12   2  -9   21.96    3.76
   2   1 -29    5.23    4.06
   3   1 -29    4.70    3.41
  -4   1 -25    3.66    6.20
  10   4 -14   -0.74    5.24
  -9   5  -4   31.30    3.78
  -8   2 -17    8.43    7.31
 -11   3  -3    0.36    6.24
   6   0 -28    4.95    5.06
   8   6   0    1.27    6.31
  -8   6   0    0.16    6.77
  -4   3 -23    7.16    5.58
   7   6 -13    1.82    6.07
  12   2  -2   -2.40    4.35
  -3   6 -16  -13.27    7.40
  12   1 -13    4.77    5.70
   3   7 -13    6.07    4.32
  10   0 -22   -2.96    6.29
   8   3 -23  -11.79    7.25
   9   3 -21   12.20    3.18
  -4   7  -8    6.51    7.23
 -11   1  -8    2.15    4.83
   9   4 -18    4.73    3.46
  -1   3 -26   -2.31    5.48
   7   2 -26   -0.26    4.97
  -8   1 -18   -0.85    6.75
   6   2 -27    6.18    5.54
  11   0 -19   10.32    8.17
  12   0 -14   16.76    3.40
   8   6  -8   13.72    2.80
 -10   2 -11   -3.03    4.72
  -6   6 -10   -2.17    6.40
   1   3 -27   13.27    3.01
  -5   0 -24    7.32    4.97
  11   2 -17    4.35    5.40
  -5   7  -5   -0.81    5.28
   4   4 -25   -7.14    5.74
  -5   2 -23    0.60    6.61
   9   1 -24    6.69    2.47
  12   2 -10   29.06    3.88
  -8   5  -9   32.13    3.79
   3   6 -19   17.92    3.33
  -8   4 -13    6.33    2.46
   4   7 -12    7.84    6.30
   9   2 -23    3.44    5.33
  -1   7 -13   30.69    3.66
   8   0 -26   -0.62    4.59
 -12   1  -2    3.77    5.69
  -1   1 -28    2.30    5.88
  -6   3 -20    0.09    5.38
   9   5 -13    2.16    4.86
 -10   4  -5   17.68    3.01
  -7   3 -18    4.57    4.72
   1   7 -14   29.61    3.64
  -2   7 -12   15.18    2.95
  -8   6  -1   14.66    2.89
  -2   5 -21    6.37    6.48
   7   1 -27    4.16    6.03
   7   5 -19   -5.07    5.27
  12   2  -1    3.82    2.97
  11   3 -14    2.64    3.10
   6   7  -3    8.77    6.38
   5   7 -10    7.97    3.04
   4   1 -29   -7.07    7.88
   6   7  -2   -4.16    5.35
   4   3 -27   -0.11    6.01
   1   1 -29   -6.81    6.09
   6   7  -4   -4.60    6.54
 -12   0  -3    7.36    4.99
 -10   3  -9    4.37    5.42
   0   6 -19   -0.61    4.60
   2   7 -14   12.63    2.95
  -6   4 -18    4.37    5.43
   6   6 -16    4.78    2.53
  -3   5 -20    5.82    6.73
  -5   5 -17   -1.61    6.20
   6   7  -1   -3.05    4.75
   0   4 -25    7.16    5.67
   2   5 -23   -3.98    4.66
   8   6  -9   -1.05    5.95
   6   1 -28    5.88    5.22
  -6   5 -15   18.88    3.05
  -7   6  -7    6.99    6.26
   6   7  -5    7.26    7.83
  10   1 -22   -2.54    6.14
   0   2 -28    2.52    5.28
  -9   0 -16    4.95    5.15
  12   2 -11   -3.86    5.74
 -11   2  -7   -1.56    4.53
   0   7 -14    7.18    5.68
   0   8   0    2.89    5.64
   8   2 -25   15.55    3.08
  -1   5 -22   -1.97    5.89
 -11   0  -9   14.80    3.17
   8   5 -17   -5.91    6.19
  12   1 -14   -7.21    5.78
  11   1 -19   16.38    3.12
 -11   3  -4   12.14    2.82
  -9   4 -10   -3.84    5.75
  -6   7   0   17.54    3.22
   0   8  -1   32.71    3.76
  -9   5  -5   -0.11    6.04
   6   7   0    9.23    6.71
  -5   6 -13   -1.98    5.90
  -5   1 -24   14.36    2.95
 -10   0 -13    0.46    5.79
  10   4 -15    8.33    2.93
   5   2 -28   16.97    3.80
   5   0 -29   12.01    3.21
   3   5 -23   -2.71    5.18
   1   5 -23    3.82    5.74
   0   0 -29   -2.34    5.55
   6   7  -6    6.21    7.06
  -7   4 -16   -7.27    7.20
  -4   6 -15   -3.49    6.09
  -8   6  -2    5.37    8.86
  12   2   0   10.87    2.79
 -12   2   0    1.94    5.59
  -9   3 -13   -3.25    5.47
  -5   4 -20  -12.64    6.29
   8   4 -21   -3.71    7.91
   8   1 -26   10.10    3.01
   0   8  -2    7.57    6.04
  10   2 -21   -0.11    6.05
   6   3 -26    0.04    6.93
  -1   8   0    7.80    5.42
  -5   7  -6   -7.81    6.07
  12   0 -15    2.71    6.26
   7   6 -14    0.82    6.13
  -5   3 -22    4.55    7.71
  -3   7 -11   22.54    3.77
   1   8  -1   -0.84    5.36
   1   8   0    5.94    2.59
   5   5 -22   11.25    3.05
  -4   7  -9   -1.57    4.55
   7   3 -25   -1.20    4.97
 -12   1  -3   54.39    5.20
  -1   8  -1    3.97    6.67
  -6   7  -1    2.97    3.72
  11   4  -5    4.23    6.09
   1   8  -2    8.45    2.48
   6   4 -24   -1.23    6.57
   6   5 -21   -7.22    5.82
  -8   3 -16    1.99    5.60
  11   4  -6   -8.57    6.87
  10   3 -19    6.11    6.24
   8   6 -10    4.78    5.84
   0   8  -3   18.68    3.07
   0   3 -27    5.22    4.43
  11   4  -4   -3.84    5.77
   5   6 -18   -4.05    6.37
   3   7 -14    8.12    7.22
   5   7 -11    7.96    6.40
   9   5 -14   23.48    3.42
   4   6 -19    0.41    7.24
   6   7  -7   -6.89    6.17
  -4   5 -19    1.97    5.63
  11   4  -7    3.09    6.61
  12   2 -12   -3.11    6.45
  -7   0 -21   -1.93    4.10
   4   7 -13   -1.03    6.01
  11   3 -15   11.31    2.68
  -1   8  -2    4.05    4.21
  -9   2 -15    6.12    6.26
  -9   1 -16   -1.21    4.99
   1   8  -3   -5.60    6.57
  11   4  -3    7.57    2.40
 -12   0  -4    3.88    5.78
 -10   4  -6    7.41    6.65
 -11   1  -9   15.06    2.87
  11   2 -18    0.94    4.68
  -2   6 -18   -7.47    6.44
  -7   5 -13   -3.31    5.52
  -3   2 -26   21.28    3.58
  -6   6 -11   -0.82    5.39
   9   4 -19    4.81    5.87
   5   4 -25    7.15    4.80
  11   4  -8   -3.10    4.82
  10   5  -5  -10.75    7.31
  -3   4 -23    7.27    5.76
  -2   4 -24   -2.37    5.61
  10   5  -4    0.69    5.18
 -10   1 -13   31.31    3.83
   5   1 -29    2.56    3.78
 -12   2  -1    4.54    4.25
  -7   2 -20    6.14    6.29
  -8   6  -3    5.85    9.16
  11   0 -20    5.77    5.95
   0   8  -4    7.49    5.09
   0   1 -29    2.00    5.64
  -6   7  -2   22.70    3.37
  -8   5 -10    3.88    5.80
   7   4 -23   -9.40    6.31
  -2   2 -27    5.74    7.35
  10   5  -6    6.33    2.11
   9   0 -25    4.24    2.88
  -1   8  -3    2.53    6.89
  -3   0 -27    1.56    6.83
   1   8  -4   10.01    2.97
  11   4  -2    6.07    2.25
   2   6 -20   -1.77    5.32
   5   3 -27    6.98    2.87
  -8   0 -19    0.33    4.78
  10   5  -3    5.88    2.78
  -1   6 -19    4.67    4.82
  12   1 -15   22.05    3.48
  -1   7 -14    6.97    2.65
   0   5 -23    6.50    6.62
  -7   6  -8    5.64    4.91
   4   5 -23    8.81    2.78
  -6   0 -23   -1.80    5.33
   6   7  -8    5.24    3.83
  -2   7 -13    1.99    4.00
   9   3 -22    5.80    5.97
  10   5  -7   12.71    3.01
   2   4 -26    6.51    6.63
 -11   3  -5   -7.71    7.01
   1   6 -20   -0.46    5.79
   1   7 -15    4.27    6.15
  -9   5  -6   -1.98    5.98
  -3   6 -17    7.53    5.10
 -10   2 -12    5.63    4.91
  10   0 -23    1.85    4.53
   2   8  -1   21.97    3.71
  -6   2 -22   -9.40    6.34
  -2   0 -28   10.33    6.89
   8   6 -11    2.79    4.65
  11   4  -9    4.90    4.00
  -4   2 -25    6.37    3.16
   3   2 -29    2.96    5.75
   2   8  -2    1.99    5.67
  -2   8   0    3.94    3.50
   2   8   0    1.99    5.67
  10   5  -2   -3.17    6.52
   2   7 -15   -2.20    6.58
   2   2 -29    4.48    5.54
 -10   3 -10    0.69    5.21
   6   6 -17    4.47    5.55
   3   4 -26    8.14    3.04
  -5   7  -7    1.60    6.85
  10   4 -16   15.61    2.85
  -4   0 -26   13.62    3.14
  -7   1 -21   -0.46    5.80
  12   2 -13    6.92    6.94
   8   3 -24    9.92    3.12
  12   0 -16   -1.78    5.35
  -8   4 -14   -3.90    5.85
   0   8  -5    4.13    5.17
  -2   8  -1   -6.53    4.91
 -11   2  -8   -7.90    6.16
   2   8  -3    3.75    4.75
   7   5 -20    6.23    4.60
  -1   8  -4   -6.38    5.97
  11   4  -1    0.69    5.22
   3   0 -30    3.75    4.75
   1   8  -5   -9.26    5.76
  10   5  -8    7.33    5.80
  -3   3 -25   43.04    4.34
 -12   1  -4   -1.83    6.91
  -1   4 -25    1.48    4.08
  -8   2 -18    3.93    5.84
   3   6 -20   -8.86    6.09
   2   0 -30   10.37    6.93
  -4   4 -22  -11.57    6.78
  -6   7  -3   -3.57    7.58
   7   6 -15    7.74    2.61
  -2   3 -26   11.69    2.94
   8   5 -18    7.94    5.51
   5   7 -12    4.14    5.18
   7   0 -28   -3.11    4.87
   1   4 -26   -1.79    5.37
  10   5  -1   10.78    2.99
   0   7 -15   16.25    3.01
   9   2 -24   -6.60    6.58
 -11   0 -10   -9.05    5.08
  11   1 -20    5.06    3.67
  -4   7 -10    9.05    6.57
  -2   8  -2    4.72    4.86
 -12   2  -2   -5.04    4.70
  11   4 -10    1.05    5.62
  -8   6  -4   -0.83    5.46
  -9   4 -11    3.56    5.49
  -1   2 -28   -0.47    5.83
   2   8  -4   -7.19    6.83
  -3   1 -27    4.16    2.72
   9   1 -25    2.60    5.41
   9   5 -15   -4.68    5.12
   6   7  -9    3.27    7.54
  -8   1 -19    1.66    5.33
  -3   7 -12   -8.11    5.17
  11   3 -16    6.39    4.62
  -6   1 -23    5.07    6.87
   2   3 -28    9.03    2.78
   7   2 -27    5.10    5.28
 -12   0  -5    0.70    5.25
  -5   6 -14    1.24    6.59
   4   2 -29   -4.90    5.82
  10   5  -9    6.81    6.10
   1   2 -29   10.22    7.48
   0   6 -20    3.95    5.88
  10   1 -23  -11.99    6.51
   3   3 -28    5.86    6.03
  -2   1 -28   -9.91    6.07
  -6   5 -16   -0.63    4.74
   4   7 -14    6.06    2.41
  11   4   0    4.90    5.96
 -11   4   0   -1.80    5.39
 -10   4  -7    7.62    5.16
  -4   3 -24   24.21    3.82
   6   0 -29   -4.32    5.53
  -1   8  -5    4.34    3.82
   3   7 -15   28.30    4.14
   4   0 -30    3.58    5.51
  -7   3 -19    3.27    2.49
  -5   5 -18    7.04    5.47
   1   8  -6    4.32    6.23
  -1   0 -29   15.90    3.18
   0   8  -6    6.08    5.38
   6   2 -28    2.27    2.51
   8   0 -27   -3.34    5.61
  -2   8  -3   -1.05    6.13
  12   3  -6    8.33    2.56
   4   4 -26    5.70    4.98
  12   3  -5    0.12    5.56
   8   6 -12    4.11    6.80
  -2   5 -22    2.23    5.04
   2   8  -5   19.74    3.30
  -4   1 -26  -11.69    6.85
 -10   5   0    1.08    5.65
  10   5   0    1.64    5.35
  10   2 -22    6.28    4.63
  12   1 -16    4.74    4.88
  -6   3 -21   -1.42    5.78
  12   3  -7    5.12    5.30
  10   3 -20   -4.51    6.17
  -4   6 -16   23.27    3.65
  -6   4 -19    3.29    2.84
   3   1 -30   -0.63    4.75
 -10   0 -14   -4.31    5.54
   1   0 -30    5.37    4.78
  12   3  -4    1.29    4.94
   8   4 -22    8.37    5.93
  -3   5 -21    5.08    6.89
  -9   3 -14   15.93    2.72
  -6   7  -4    0.12    5.58
   2   1 -30    7.64    5.17
  11   2 -19    7.98    3.29
  12   2 -14   -1.26    6.73
  -9   0 -17   -2.78    5.34
  -1   3 -27    4.37    4.44
  11   4 -11    7.64    5.17
   5   6 -19    3.86    3.00
 -11   3  -6   -4.70    5.15
  -5   2 -24    2.40    6.12
   7   1 -28   -8.74    5.51
  12   3  -8    9.87    7.23
   2   5 -24   -0.09    6.23
  -9   5  -7   19.23    2.98
  -7   4 -17   -3.94    5.92
  -5   0 -25   40.39    4.65
 -11   1 -10   -7.04    6.32
  -5   7  -8   -8.60    6.50
  10   5 -10   -0.05    4.41
  -7   6  -9   -4.32    5.56
   1   3 -28    1.67    5.37
  -6   6 -12   11.06    2.95
  12   3  -3    0.66    6.88
   8   2 -26    0.50    5.96
   6   7 -10   24.66    3.45
   9   4 -20    4.47    2.64
  -8   5 -11   30.18    3.80
   4   3 -28    3.89    5.94
   6   5 -22   -2.25    5.05
  -2   8  -4   -2.12    6.13
   4   6 -20   15.29    3.36
 -11   4  -1    3.53    5.58
  -1   5 -23   -0.92    5.55
   5   5 -23   -1.52    5.84
 -12   1  -5   15.88    3.07
  12   0 -17   -3.55    7.21
  11   0 -21   -0.34    5.23
 -12   2  -3   -1.30    5.14
   2   8  -6    3.53    5.58
   3   5 -24   21.35    3.26
  -7   5 -14    3.30    6.23
  -8   6  -5   13.13    3.03
  10   4 -17   -3.46    5.69
   3   8  -1   -0.56    5.92
  -1   8  -6    4.37    4.48
  12   3  -9    2.93    5.88
 -10   5  -1   -5.76    5.11
   3   8  -2    3.54    3.13
   0   4 -26    8.45    2.30
   5   7 -13  -11.06    6.07
   1   8  -7    7.77    6.27
   6   1 -29  -10.10    6.15
   1   5 -24    8.13    2.73
  -1   7 -15   15.11    3.36
  -2   7 -14   47.43    4.76
  -8   3 -17    3.90    5.97
   4   1 -30    7.04    5.54
  -5   4 -21    0.41    6.02
   3   8   0    0.87    4.55
   0   8  -7   -6.60    6.10
  -1   1 -29   -5.86    6.79
  -3   8   0  -12.41    5.63
   8   1 -27    5.97    7.04
   3   8  -3    0.64    5.33
  13   0  -6    1.47    4.16
  12   3  -2    7.94    2.48
   1   7 -16   12.89    3.01
  13   0  -7    3.78    4.85
  -9   2 -16    7.51    2.83
  13   0  -5   -7.57    6.04
   2   7 -16   11.65    3.07
   6   4 -25    1.37    4.32
   7   6 -16   -1.35    4.28
   7   3 -26   -0.57    5.94
   1   1 -30    2.40    3.76
 -10   1 -14    5.49    5.77
   9   5 -16    3.31    6.25
  -2   6 -19   -5.42    5.55
 -11   2  -9    7.43    5.94
   6   3 -27    6.24    4.18
   6   6 -18   -1.77    6.50
  -3   8  -1   -0.70    4.83
  -9   1 -17   13.88    3.17
  13   0  -8    0.64    5.35
  -4   5 -20    6.46    2.62
  11   4 -12    0.75    3.51
 -10   3 -11    5.31    3.95
  -4   7 -11    1.98    5.83
   3   8  -4   -8.20    6.33
  10   5 -11   -5.05    5.93
   8   6 -13   -2.38    6.76
  11   3 -17   -7.23    6.41
  -6   7  -5   10.36    2.76
  13   0  -4    1.25    3.55
   5   2 -29    5.87    5.64
 -10   2 -13    1.75    6.46
  12   3 -10   -5.79    5.14
  -5   3 -23    7.68    5.24
 -12   0  -6    5.88    6.15
   0   2 -29    6.70    5.16
  -5   1 -25   -0.70    4.84
   9   3 -23   13.13    2.56
  -2   8  -5    3.29    2.68
   5   0 -30   -3.72    6.37
   2   6 -21    8.42    6.02
   7   4 -24   12.35    2.91
   8   5 -19    6.11    5.48
  12   2 -15    3.51    3.03
  13   0  -9    4.16    5.31
  10   0 -24   12.18    3.00
   2   8  -7    3.32    2.57
  -1   6 -20   -5.44    5.57
  -3   6 -18    4.31    6.36
  12   3  -1    0.04    5.68
  -3   8  -2    3.41    2.85
 -11   4  -2   -1.54    5.91
  -3   7 -13    6.73    5.17
   9   6  -4    0.27    4.94
   6   7 -11  -15.02    8.12
   9   6  -5    6.78    2.52
   4   7 -15    0.41    6.06
 -10   4  -8    6.26    6.52
  11   1 -21    3.33    6.30
   9   0 -26    1.61    5.46
   7   5 -21    0.41    6.06
  12   1 -17   -0.80    6.60
  13   0  -3   -3.13    6.11
   0   7 -16    6.26    6.52
   3   8  -5   -7.50    7.02
   1   6 -21   11.77    3.04
 -10   5  -2    6.92    2.73
  -7   0 -22    3.57    5.64
   9   6  -3    8.07    5.67
 -11   0 -11   19.06    3.01
   5   4 -26   -3.13    6.11
  -8   4 -15   -0.20    6.35
   7   7  -3   -0.44    6.94
  -1   8  -7    1.76    4.59
   7   7  -4    7.72    5.27
   0   0 -30    8.83    6.41
   1   8  -8   -6.06    5.88
  -9   4 -12    5.90    6.18
   9   6  -6    6.50    5.89
   4   5 -24    3.71    6.64
   7   7  -2    0.27    4.96
  13   1  -6   13.22    3.44
  -7   2 -21   -3.51    5.76
  13   1  -7   -6.07    5.89
   3   7 -16    5.90    6.19
   3   6 -21    8.94    2.76
   0   3 -28    9.50    2.69
   0   8  -8   -8.02    5.73
   9   6  -2   -1.69    4.77
   7   7  -5    7.26    2.96
  -8   0 -20   -2.26    7.67
  13   1  -5    7.98    2.57
  13   0 -10   -6.20    4.73
  -5   7  -9   -0.57    6.01
  12   3 -11   -0.20    6.37
 -12   2  -4   -2.53    5.86
 -11   3  -7   20.29    3.58
  -3   4 -24  -10.10    7.16
   8   3 -25    1.86    4.71
  -8   6  -6   10.90    3.18
  -9   5  -8   31.87    4.21
   0   5 -24   -2.76    6.49
  -2   4 -25    6.77    5.20
   7   7  -1   -2.16    6.21
  13   1  -8   -3.14    6.14
   9   6  -7    6.66    6.87
  -3   8  -3    8.95    2.52
  -5   6 -15   -8.15    7.30
  13   0  -2   -1.55    5.94
  10   5 -12    4.16    3.43
  11   4 -13    2.38    6.25
  13   1  -4   -4.36    6.69
   5   3 -28   -7.30    6.47
   7   7  -6    1.62    5.49
   3   8  -6    6.44    5.26
  11   2 -20   -0.20    6.38
  -7   6 -10    2.18    4.30
 -12   1  -6    4.82    5.02
  12   3   0    4.20    5.35
 -12   3   0    0.41    6.11
  -2   8  -6   -0.71    4.89
   5   1 -30   -5.72    6.29
  -3   2 -27    5.80    5.12
  10   3 -21    3.11    3.98
   9   2 -25    6.81    2.69
   9   6  -1    6.68    6.89
  12   0 -18   11.73    8.05
   5   7 -14    3.60    5.68
  -8   2 -19    1.77    6.54
   2   8  -8    4.07    4.04
  -6   7  -6    4.19    2.92
   2   4 -27    1.26    5.09
  13   1  -9   -2.77    6.52
  10   1 -24    1.63    5.51
  -6   2 -23    9.60    2.64
  -6   0 -24   37.28    4.07
   7   7   0    4.44    5.66
  -7   7   0   19.47    3.20
   9   1 -26   -0.34    5.34
  -6   5 -17    2.38    6.28
  10   4 -18    5.20    5.46
  10   2 -23    6.46    7.47
  13   1  -3   -3.77    6.45
   9   6  -8    8.05    7.30
   3   4 -27   11.99    2.97
  13   0 -11   -1.05    7.25
  -2   2 -28   -2.78    6.53
  -7   1 -22    5.48    7.42
  -6   6 -13   -5.61    7.24
   8   6 -14    3.98    3.51
 -11   1 -11   -6.73    6.23
   0   6 -21    5.34    6.52
   7   7  -7    4.83    5.05
 -10   5  -3    4.36    6.44
  -4   6 -17   19.43    3.69
   0   1 -30    7.01    2.35
  -3   0 -28   -4.77    6.39
 -11   4  -3    1.26    5.10
  -8   5 -12    8.41    3.13
  -4   4 -23    1.78    6.57
   5   6 -20    4.98    6.16
  12   3 -12   47.53    4.86
  13   0  -1    6.20    5.56
  -9   3 -15    5.08    2.89
   8   4 -23   -2.92    5.50
   6   7 -12   26.21    3.83
  -3   8  -4   -0.58    6.07
  -4   2 -26   -2.17    6.27
 -10   0 -15   -5.14    6.04
   9   6   0    2.32    4.08
   9   4 -21    3.85    4.96
  -9   6   0    5.60    5.88
  12   2 -16    2.01    5.93
  -1   8  -8    3.60    2.71
   9   5 -17   -4.76    6.40
  13   1 -10    4.23    5.39
  -8   1 -20    1.21    4.28
  -5   5 -19    5.22    5.49
  -1   4 -26   -2.93    5.51
   1   8  -9   -0.34    5.36
   7   6 -17   -1.81    6.62
   3   8  -7    4.31    4.20
   3   2 -30   15.75    3.54
   7   0 -29    0.42    6.14
  11   3 -18   -4.16    6.12
  11   0 -22    2.63    5.64
  -2   7 -15    4.13    7.06
   2   2 -30    4.28    3.19
  -3   3 -26    0.79    6.51
 -12   0  -7   -4.92    5.34
  -2   0 -29   -5.15    6.05
  -7   7  -1   38.51    4.01
  13   1  -2   22.97    3.88
   1   4 -27   -7.89    5.06
  -1   7 -16   -4.41    6.76
   7   2 -28   10.84    8.06
  -4   0 -27   -4.92    5.34
  -4   7 -12    3.63    5.73
  -7   3 -20    4.25    5.42
 -12   3  -1    1.03    5.88
   9   6  -9   10.84    2.85
   0   8  -9    1.65    5.56
   1   7 -17  -17.41    7.33
 -11   2 -10   -1.71    4.84
  -2   3 -27    7.60    6.07
   2   7 -17    5.85    5.17
   4   6 -21    1.65    5.56
  -7   5 -15    6.85    5.26
  -6   4 -20    0.04    5.79
  10   5 -13    3.25    5.32
  12   1 -18   -6.15    5.98
   7   7  -8    9.54    2.60
  -9   0 -18    0.27    5.04
   6   6 -19    4.25    5.41
   3   0 -31    6.61    5.99
   4   8  -2    4.86    5.08
   8   0 -28    3.68    3.52
  13   0 -12   -4.32    5.01
  -7   4 -18    5.49    4.72
  -2   5 -23   -3.57    5.85
  11   4 -14   -2.57    5.93
  -2   8  -7    1.41    6.26
   4   8  -1    6.86    5.27
   6   5 -23    6.75    6.98
  -6   1 -24    8.74    2.73
 -12   2  -5    8.81    2.76
  -3   5 -22    6.38    6.64
   4   8  -3    6.52    7.55
   4   4 -27    7.76    7.05
 -10   3 -12   -0.35    5.40
   2   0 -31    6.62    6.00
 -10   4  -9   -2.33    5.21
   2   8  -9   -7.55    5.51
  13   1 -11   -5.41    6.71
  -8   6  -7   -6.38    8.82
  -6   3 -22    3.88    4.99
  -9   6  -1    5.82    4.33
   4   7 -16   -4.18    6.16
   6   2 -29   -1.57    6.03
  -4   8   0   -3.57    5.86
   4   8   0    6.13    2.79
  -4   3 -25    1.27    5.15
   3   3 -29    8.79    3.06
   2   3 -29   -4.57    5.78
  -3   1 -28   15.93    3.72
  13   0   0    0.42    6.19
  -5   7 -10    9.01    6.54
 -13   0   0   -8.04    6.85
   4   2 -30    8.63    6.18
   6   0 -30    1.66    5.59
  -3   8  -5    4.79    6.86
   4   8  -4   -0.72    4.96
   8   5 -20    1.66    5.59
  -1   2 -29   -5.57    5.70
   8   2 -27    2.41    6.36
  -3   7 -14   37.24    4.54
   5   5 -24    3.07    3.15
  -7   7  -2   -0.45    7.09
   2   5 -25    8.91    7.98
  13   1  -1    6.88    5.29
  -6   7  -7    3.27    5.36
  12   3 -13    6.54    7.56
 -10   1 -15    4.46    4.00
 -11   3  -8   -0.10    4.59
   3   8  -8   -0.58    6.12
  -9   5  -9   18.81    3.57
 -10   5  -4   -1.34    5.33
 -10   2 -14    2.52    4.41
   1   2 -30   -3.20    6.26
  -8   3 -18   11.51    3.04
   9   6 -10    6.13    4.35
   7   1 -29   -3.44    6.89
  11   1 -22   -2.92    8.06
  -4   8  -1  -13.69    6.77
 -11   4  -4    6.53    4.85
   4   0 -31   -2.72    4.77
   3   5 -25   -8.44    6.52
  -9   2 -17    0.04    5.83
 -12   1  -7   -1.34    5.34
  -2   1 -29    4.04    6.17
   0   7 -17    7.30    2.66
   7   7  -9   23.07    3.45
  -2   6 -20   -1.96    5.66
   3   7 -17   25.24    3.57
  -1   5 -24   -0.10    4.60
   4   8  -5   21.34    3.55
  -4   1 -27    7.08    3.18
   5   7 -15   15.84    3.29
 -11   0 -12    3.28    5.38
   9   3 -24    5.81    6.96
  -1   8  -9    4.53    4.64
   8   6 -15    8.43    6.84
  12   0 -19   -9.84    6.08
  -5   2 -25    1.28    5.18
  -9   4 -13    7.05    6.42
 -12   3  -2   13.47    2.86
  -1   0 -30   -4.84    6.49
   6   7 -13    5.79    2.37
   7   5 -22    1.67    5.62
  -1   3 -28    3.53    4.54
   1   8 -10    5.54    4.75
  -7   6 -11    7.70    5.23
   1   5 -25    2.66    5.71
  13   0 -13   -1.35    5.34
  -9   1 -18    9.81    3.16
   6   4 -26    3.43    6.47
  13   1 -12   -6.60    5.65
   3   1 -31    4.43    6.55
  -5   4 -22    7.31    5.74
   8   1 -28   -0.96    5.77
  10   0 -25   -3.59    5.90
  -3   6 -19   -3.45    6.92
   2   6 -22    0.80    6.60
  -4   5 -21   10.61    7.87
   7   3 -27   -0.35    5.44
  -9   6  -2    1.28    5.19
  -5   0 -26    2.04    6.03
   4   3 -29    5.06    6.28
  12   2 -17   18.60    3.48
   1   0 -31   15.46    3.21
   2   1 -31   13.60    2.99
  -4   8  -2   -3.36    5.16
  11   2 -21    6.55    4.87
   7   4 -25    1.42    6.33
   1   3 -29   -2.83    6.65
  -8   4 -16    8.85    7.21
  -1   6 -21    5.31    5.58
  10   4 -19    4.68    5.90
   0   8 -10    3.30    5.39
   0   4 -27    5.93    5.24
  10   5 -14    0.66    5.54
  -7   7  -3    7.72    3.21
   4   8  -6    3.92    5.05
 -13   1   0   -6.50    6.72
  -2   8  -8    0.80    6.62
   6   1 -30    3.54    4.56
  13   1   0    2.44    6.42
 -13   0  -1    9.87    7.28
   6   3 -28    6.85    7.07
   1   6 -22   -2.60    6.01
  -5   6 -16    4.94    5.15
  13   2  -6    2.91    4.94
  -3   8  -6    4.45    6.58
  11   4 -15    5.56    4.78
  10   3 -22   -2.84    6.67
   2   8 -10   -3.62    5.93
  13   2  -7    3.82    3.44
  13   2  -5    3.69    5.83
   9   5 -18   -2.99    5.62
   9   0 -27    3.69    5.83
   9   6 -11  -10.64    7.92
   3   6 -22    5.46    6.66
   3   8  -9   -2.99    5.62
  11   3 -19    7.77    8.53
  12   3 -14   25.19    3.93
  13   2  -8   24.02    3.68
   7   7 -10    3.99    6.25
   4   1 -31    5.26    5.62
 -12   0  -8   19.78    3.60
  -6   6 -14    2.99    6.17
   7   6 -18    5.27    5.63
  -5   3 -24   12.10    3.37
  13   2  -4   19.97    3.60
   4   5 -25   11.65    3.69
 -11   1 -12    0.97    6.01
 -12   2  -6    1.61    5.69
  -8   5 -13    2.43    3.94
  -4   8  -3    1.23    3.72
  12   1 -19    1.31    5.40
  -1   1 -30    4.02    2.25
   5   2 -30    5.49    7.64
  -8   6  -8  -10.34    6.84
   8   3 -26    3.84    7.81
  -4   7 -13    4.53    4.71
  13   1 -13   10.34    2.96
 -10   5  -5    7.31    5.82
   5   4 -27   -3.46    5.22
   4   8  -7    3.74    6.92
  10   1 -25    3.26    5.45
  -6   7  -8  -13.76    6.24
  10   2 -24   -6.76    5.73
  13   2  -9   -0.58    7.23
  13   0 -14    3.26    5.45
   9   4 -22    4.01    3.14
 -11   4  -5   10.21    2.65
  -5   1 -26   -1.33    6.54
   5   6 -21    2.73    6.86
  -9   6  -3    7.01    8.82
  -2   7 -16    1.61    4.03
   1   1 -31    8.41    3.25
   9   2 -26    2.73    6.85
 -12   3  -3   -1.07    5.86
  -7   0 -23    4.40    3.29
  13   2  -3   -1.44    5.43
   5   0 -31    7.76    3.06
  -8   0 -21    6.21    4.43
  -7   2 -22    3.64    5.89
 -11   2 -11    2.25    5.38
  -4   6 -18   -0.74    8.64
  -6   5 -18    3.64    5.89
  11   0 -23    9.09    6.68
  -5   7 -11    4.65    5.98
   0   2 -30    4.76    7.01
  -7   7  -4   17.22    3.17
  -1   7 -17  -10.75    6.50
   0   5 -25   -1.07    5.86
 -13   1  -1    4.02    6.29
 -10   4 -10    4.29    5.57
  -1   8 -10   12.25    3.21
   2   7 -18   -7.60    7.68
   4   7 -17    5.68    6.07
   8   4 -24   -7.81    5.66
   1   8 -11    5.68    6.07
   1   7 -18    8.85    7.31
  -9   3 -16   -0.43    5.54
 -13   0  -2   -4.93    7.57
  13   2 -10   -6.69    6.82
  -8   2 -20    5.20    4.32
   9   1 -27    0.96    6.05
   6   6 -20    5.31    5.67
   6   7 -14    6.44    6.82
  -3   4 -25   -5.30    7.24
   0   6 -22   -1.98    6.86
 -10   0 -16   -2.36    6.49
 -11   3  -9   -3.11    5.70
  -3   8  -7    4.00    3.02
  -4   8  -4   -2.47    5.36
  -2   4 -26   -3.65    7.06
  -9   5 -10   52.40    4.96
   9   6 -12    9.13    6.71
   8   6 -16   -5.15    5.51
 -12   1  -8   -0.43    5.56
  13   2  -2    0.97    6.06
  10   5 -15    7.74    6.25
  -2   8  -9    6.08    6.48
 -10   3 -13    5.71    2.45
   7   7 -11    3.34    2.76
   5   3 -29    7.44    3.23
  -7   5 -16   -2.58    3.91
   5   7 -16   -3.11    5.71
  -3   7 -15    8.03    3.39
   0   3 -29   -5.80    5.86
   0   8 -11   -3.12    5.71
   3   8 -10   11.09    2.96
   4   8  -8    4.14    7.31
  -5   5 -20    6.54    2.86
   8   5 -21    6.72    6.18
   4   6 -22    9.53    7.08
   2   8 -11    3.15    4.16
  12   2 -18    3.50    7.57
   0   0 -31    2.91    3.57
  12   3 -15   -0.31    6.67
  12   0 -20    8.88    7.34
  11   4 -16    7.94    2.71
  13   1 -14   -0.69    6.31
   2   4 -28    3.03    6.26
  -6   2 -24   -3.77    6.06
   3   4 -28    1.73    4.83
  -7   1 -23   -0.70    6.31
  11   5  -5    6.37    5.79
  -7   6 -12   -4.53    5.19
   5   1 -31   -1.34    6.61
  11   5  -6    7.50    6.94
  13   2 -11    2.00    6.17
  -8   1 -21   -1.88    7.83
   6   5 -24    3.47    2.37
   3   7 -18    7.02    5.45
  -4   4 -24    2.28    5.43
  -6   0 -25    6.37    5.80
  11   5  -4   10.62    2.82
  11   1 -23   -3.78    6.06
  -7   4 -19    3.72    2.73
  -9   6  -4    7.90    7.31
  -3   2 -28   -8.15    6.43
  13   0 -15    1.60    5.07
   0   7 -18   -5.46    6.30
  11   5  -7    4.97    5.26
  12   4  -6    7.76    2.72
  12   4  -5    6.65    5.00
  -9   0 -19   17.63    3.30
  -7   3 -21    0.22    5.23
  13   2  -1   -4.69    7.04
  10   4 -20    5.74    6.13
  -6   4 -21   -3.24    4.40
  12   4  -7   -5.45    6.31
 -11   0 -13   -2.10    5.84
  11   5  -3    8.06    5.56
 -13   1  -2   14.28    3.16
 -10   2 -15   -2.92    7.79
 -12   3  -4    4.72    6.06
 -10   5  -6   -6.11    6.61
  -7   7  -5    4.72    6.06
   7   0 -30    6.39    5.82
 -10   1 -16    3.04    3.63
   7   2 -29  -13.48    7.67
  -9   4 -14    3.58    4.67
  12   4  -4    2.01    6.19
  -4   8  -5    5.64    4.90
   5   8  -2   -7.41    7.17
  11   2 -22   -0.70    6.34
  -1   4 -27    7.43    5.91
   5   8  -3    8.45    6.00
   9   5 -19    5.31    3.60
 -12   2  -7    0.71    6.80
  -2   2 -29    3.75    3.06
   8   0 -29    4.72    6.06
  -2   5 -24   -3.41    6.48
 -11   4  -6   -3.53    5.32
  11   5  -8    8.08    5.57
   5   8  -1    3.35    2.51
   5   5 -25    0.22    5.25
  -6   7  -9    0.06    7.08
  -3   5 -23    5.88    2.72
  12   4  -8   -6.23    5.48
  -8   6  -9    3.05    6.30
  -4   2 -27    3.31    5.55
   7   5 -23   -0.81    5.15
  11   3 -20   -0.05    6.03
 -13   0  -3    3.43    6.68
   5   8  -4    8.20    6.70
   4   8  -9    5.61    3.26
 -12   0  -9   -6.89    5.83
   1   4 -28    5.76    6.16
  -3   0 -29    3.27    8.21
  11   5  -2    5.00    5.29
   9   6 -13    5.00    5.29
  12   4  -3    5.49    6.84
   9   3 -25   -1.74    6.28
  -3   3 -27   -7.05    7.53
   0   1 -31    0.60    5.72
  -9   2 -18   -1.24    7.63
  12   1 -20    4.19    7.39
  -8   3 -19    5.77    6.17
  -3   8  -8    2.01    6.22
  13   2 -12   -3.80    6.10
   8   2 -28    2.67    5.90
   7   7 -12    7.18    6.63
   3   2 -31    6.42    5.84
  -2   6 -21    6.53    6.93
   7   6 -19    6.25    2.43
   4   4 -28   -4.18    5.69
  -5   8   0   -0.05    6.06
   5   8   0   -2.50    5.43
  -1   8 -11   -0.05    6.05
  -6   3 -23   -2.77    6.20
   2   5 -26    3.71    5.99
   1   8 -12   -0.05    6.05
   2   2 -31   -4.85    6.02
   5   8  -5    5.12    3.74
  10   3 -23    7.03    8.18
  10   0 -26   -2.23    4.55
   3   8 -11    6.43    5.85
  12   4  -9    6.81    6.26
  -2   3 -28   17.09    3.65
  -6   1 -25    4.37    5.67
  11   5  -9    1.26    5.37
  -3   6 -20    4.74    6.10
  -4   0 -28    0.34    6.46
   8   7  -4    8.50    6.03
  -5   6 -17    8.24    6.74
 -13   2   0    2.67    5.92
   8   7  -3    2.02    6.24
  13   2   0    0.98    6.15
  -8   4 -17    6.06    5.42
   3   5 -26    5.22    2.68
  -2   0 -30   20.17    3.78
  -4   7 -14   22.28    3.52
   6   7 -15    2.30    5.47
   6   2 -30   -3.81    6.12
   2   6 -23   10.16    8.39
  13   1 -15  -14.71    6.68
  -2   8 -10  -12.65    6.85
  -6   6 -15   -0.86    7.98
   8   7  -5   -2.01    6.98
  10   5 -16    3.98    5.21
  -5   7 -12    5.35    3.70
  12   4  -2    5.51    4.86
  -9   1 -19   -5.24    5.62
  -4   3 -26    3.97    2.74
  12   3 -16   -6.81    6.95
  -5   8  -1    5.03    5.32
  -8   5 -14    0.61    5.74
   8   7  -2   -4.58    5.25
 -11   1 -13    1.76    6.93
  11   5  -1    6.45    5.87
   7   4 -26    4.92    3.79
   6   0 -31   -9.01    5.68
   2   8 -12   -9.28    6.42
  -1   5 -25    1.07    3.65
   3   3 -30    0.34    6.48
   3   0 -32   -7.97    5.78
   6   4 -27    3.07    6.34
   0   8 -12    6.15    4.27
   8   6 -17   -4.86    6.05
   7   1 -30    7.70    2.83
  -1   6 -22   -0.05    6.09
   5   8  -6    8.53    6.05
   8   7  -6    2.31    5.49
 -10   4 -11    2.88    4.35
  -9   6  -5   23.19    4.01
   2   3 -30    6.24    5.03
  -4   5 -22    3.99    5.23
   4   2 -31    4.90    2.70
  11   4 -17    3.61    4.72
   3   6 -23    4.19    3.87
   1   6 -23   -2.52    5.47
   7   3 -28    4.61    7.78
   8   1 -29    0.88    4.92
   1   5 -26   -1.09    6.00
  -4   8  -6   -6.68    5.06
  13   0 -16    1.37    6.57
  12   4 -10   -0.05    6.09
 -11   2 -12   -1.75    6.33
  -2   7 -17    3.18    7.39
  -5   4 -23    2.69    5.94
   2   0 -32    5.89    2.81
   4   7 -18   15.33    3.40
 -13   1  -3    8.43    2.74
 -11   3 -10    2.03    6.27
 -12   1  -9    4.96    2.64
   8   7  -1   -8.27    6.52
  -7   7  -6   -4.22    5.73
  12   2 -19   -2.13    5.92
   9   4 -23   -2.13    5.92
  11   5 -10    4.54    3.05
  -3   1 -29    5.66    7.86
  -9   5 -11    7.63    7.06
  -1   2 -30    3.73    6.04
  13   2 -13    6.37    4.54
   5   7 -17   -5.15    6.77
   4   8 -10   -1.86    5.11
  12   4  -1   -7.13    7.60
  10   2 -25   -1.10    6.01
  11   0 -24    8.18    5.65
   8   7  -7   -4.50    6.48
   9   0 -28    3.03    4.09
   5   6 -22   -0.82    5.21
  -1   7 -18   -6.69    5.07
  -5   8  -2    8.96    6.48
  -5   2 -26    8.82    3.69
 -12   3  -5    1.93    5.04
   2   7 -19   -1.21    4.70
   1   2 -31   -1.37    6.73
  10   1 -26    4.01    5.25
   4   0 -32    3.09    6.38
  11   5   0   -4.39    7.50
   6   6 -21    7.15    5.56
 -11   5   0   11.77    3.04
   1   7 -19    7.92    6.41
  12   0 -21    6.76    5.08
   5   8  -7   -1.87    5.12
 -10   5  -7    6.11    5.47
   6   3 -29    8.31    6.79
  -4   1 -28    5.46    5.82
 -13   0  -4   -1.10    6.04
 -13   2  -1   -5.17    6.80
  -1   3 -29    8.98    6.50
  -2   1 -30    6.78    5.09
   4   3 -30   -4.24    5.76
   9   6 -14   -0.32    6.82
   8   7   0   10.41    6.96
  -8   7   0    4.66    2.78
   4   5 -26    1.66    5.88
  -4   6 -19   -1.26    7.73
   8   3 -27   -5.94    6.00
  -3   7 -16    5.73    4.98
   7   7 -13   -3.35    7.59
   0   4 -28   -9.37    6.48
  12   4 -11    0.61    5.80
  -3   8  -9    6.51    5.92
  -6   5 -19   11.19    3.11
  -5   0 -27    1.66    5.89
 -11   4  -7    1.27    5.45
   6   1 -31   -9.25    7.51
   9   2 -27   -5.56    6.43
   1   3 -30   -6.23    6.73
 -10   3 -14    3.03    3.29
   3   1 -32    6.51    5.93
   8   4 -25    8.45    7.79
  -7   6 -13    2.83    7.08
   8   5 -22    5.08    3.80
  -6   7 -10   16.61    3.12
   8   7  -8  -11.48    6.32
  -1   0 -31    4.55    3.40
  -9   3 -17   11.97    3.11
  11   5 -11    2.71    5.99
 -12   2  -8    2.33    5.55
  10   6  -5   -1.88    5.14
   3   8 -12   11.22    3.43
  10   6  -4    0.22    5.35
   5   4 -28   -1.88    5.14
  13   1 -16    1.39    6.63
   3   7 -19   -1.49    5.62
  -5   8  -3    0.34    6.55
  -7   5 -17    3.37    4.00
   2   1 -32   -0.16    4.85
  -8   6 -10   13.90    3.27
 -10   0 -17   -0.05    6.16
  -5   3 -25    5.73    4.68
 -12   4   0    3.61    7.80
  10   6  -6    0.22    5.35
  12   4   0   12.41    2.88
   1   0 -32   -3.65    8.21
  -1   8 -12   -4.53    6.53
  10   4 -21   -3.59    5.42
  10   6  -3    3.49    6.81
   9   5 -20   11.25    7.71
   1   8 -13    2.21    4.07
   0   6 -23   -1.77    6.40
  -8   7  -1   15.78    3.16
  11   1 -24    8.65    6.13
  -4   8  -7   -0.82    5.26
   4   6 -23   -8.36    6.59
   5   8  -8   -0.32    6.88
  -8   0 -22    6.16    5.51
   9   1 -28   10.89    2.79
 -11   5  -1   -0.60    7.52
  13   2 -14    5.60    6.98
  10   6  -7    1.28    5.47
  -2   8 -11   -1.11    6.08
  12   3 -17    3.48    2.68
  -9   6  -6   29.71    4.26
  -7   2 -23   -5.99    6.06
   0   7 -19    4.33    4.35
  11   3 -21   16.27    3.66
  10   5 -17    2.72    6.02
 -12   0 -10   -6.55    7.43
   4   1 -32    2.34    5.58
   5   2 -31    1.12    7.32
  -8   2 -21    7.57    3.13
   0   5 -26   -4.16    6.94
  -7   0 -24   -2.66    4.03
  12   1 -21    4.36    3.48
   6   7 -16    6.78    8.02
   2   8 -13    0.34    6.58
 -13   1  -4    0.22    5.38
  10   6  -2    8.66    6.14
  11   2 -23   -2.05    7.10
 -11   0 -14   -7.45    5.52
   8   7  -9   11.20    2.84
   4   8 -11    7.62    6.06
  -5   5 -21  -12.11    7.68
  13   0 -17  -10.38    7.48
  -7   7  -7   -5.05    6.19
  12   4 -12    7.17    5.63
  13   3  -6    6.50    5.99
  13   3  -7   -0.14    6.21
  -9   4 -15   -3.02    5.09
  -5   1 -27    6.58    7.11
  13   3  -5    5.52    7.04
 -13   2  -2   -0.98    3.68
   0   8 -13   -7.47    6.74
  10   6  -8    2.65    3.50
   6   5 -25    6.89    6.42
   7   6 -20   -1.96    5.20
 -10   2 -16    3.64    4.83
  11   4 -18   -0.14    6.22
  -3   4 -26   -1.20    6.14
  -1   1 -31    3.64    4.83
   5   0 -32  -10.64    6.49
  13   3  -8    2.65    6.07
  -5   7 -13    9.36    2.94
  11   5 -12   -5.06    6.19
   8   6 -18    7.19    5.65
  -5   8  -4    5.08    5.46
  13   3  -4    3.64    2.72
  10   6  -1   -2.94    6.38
  -7   4 -20    4.21    3.95
 -12   4  -1   20.07    3.72
 -12   3  -6  -10.98    7.20
 -10   1 -17    4.79    6.27
  -8   7  -2   -0.82    6.57
  -4   7 -15   -0.45    6.95
  -2   4 -27   -2.49    7.80
   1   1 -32    0.23    6.64
   9   6 -15    4.59    4.27
   7   5 -24   -7.41    7.78
   5   3 -30   -4.99    7.30
 -13   0  -5    1.52    4.60
   0   2 -31  -10.61    7.57
   5   8  -9    7.29    6.85
   7   7 -14   -1.96    5.22
  12   2 -20    5.29    2.85
  13   3  -9    1.98    6.42
  10   3 -24    4.10    6.60
  -9   0 -20    1.41    4.09
  -8   1 -22    3.35    4.07
  10   6  -9   -8.27    5.94
 -11   5  -2    7.23    5.68
 -10   5  -8    3.05    6.53
   9   3 -26    2.96    5.26
 -10   4 -12    6.02    4.24
 -12   1 -10    3.96    4.92
  -3   8 -10    6.58    4.68
  -6   6 -16    3.35    5.75
  13   3  -3    1.98    6.43
  -6   4 -22    3.33    2.71
   8   7 -10   -3.47    8.65
 -11   3 -11   -4.32    7.03
  -7   3 -22   -1.97    5.23
  -7   1 -24   -0.53    5.82
  -4   4 -25    0.54    5.91
  -8   5 -15    0.24    6.68
   5   5 -26    7.69    7.24
  -6   2 -25   17.95    3.33
   5   7 -18   -3.26    7.12
   2   4 -29    3.43    6.93
   3   4 -29   -6.45    6.88
  -9   5 -12   -4.71    6.66
   0   3 -30    6.79    4.83
  -5   6 -18   -0.82    6.59
  13   1 -17    1.69    7.14
  13   2 -15    5.48    5.95
 -11   1 -14   -5.48    5.79
   4   7 -19    2.65    4.33
  10   6   0   -0.90    5.35
 -10   6   0   -4.72    6.66
  12   4 -13   -0.37    7.98
   3   8 -13    1.60    6.02
  -2   6 -22    4.30    3.29
  -9   2 -19    8.78    7.34
  -4   8  -8    2.49    2.95
 -11   4  -8   -5.40    6.97
  10   0 -27    2.98    5.28
  13   3 -10    5.88    6.39
 -11   2 -13    0.24    6.69
  -8   3 -20    5.35    4.49
  -3   5 -24   18.64    4.10
  -6   0 -26    4.62    4.31
  -8   4 -18    5.80    5.10
   7   2 -30   -7.92    6.40
  -3   6 -21    6.27    6.81
  -2   5 -25    6.49    4.67
   5   1 -32   -0.14    6.28
  -2   7 -18   -0.14    6.28
  12   0 -22   -0.37    8.00
  -6   7 -11   -3.35    6.01
   8   0 -30    5.59    7.11
   7   0 -31    4.16    2.69
  13   3  -2    2.29    5.67
  -8   7  -3   13.22    2.97
  -5   8  -5    4.83    6.32
  11   5 -13    8.41    6.98
   8   2 -29   16.07    3.51
  -9   6  -7   -1.51    6.93
   0   0 -32    7.65    6.17
   2   6 -24   -0.83    6.62
 -13   2  -3   -1.21    6.20
   4   8 -12   22.04    3.90
   9   4 -24    0.16    5.47
  10   6 -10    2.20    4.16
 -12   2  -9   -4.81    5.45
  -1   8 -13    3.76    6.23
 -12   4  -2    1.92    5.19
  -3   2 -29    7.66    6.17
   2   7 -20   10.01    2.74
  -1   4 -28    1.01    7.48
  12   3 -18  -15.96    8.21
 -13   1  -5    5.13    5.52
  -1   7 -19   -0.45    7.02
  11   0 -25    0.55    5.95
  -8   6 -11    5.34    4.08
   1   8 -14    7.06    7.58
   6   8  -3    3.84    7.34
  -2   8 -12    5.14    5.52
   2   5 -27   11.02    3.31
  -7   7  -8   -0.14    6.31
  -9   1 -20    6.66    2.65
   6   6 -22   -3.75    5.56
   5   8 -10   48.09    4.76
  13   0 -18   -2.28    6.12
  -6   3 -24    0.24    6.73
   7   4 -27   -4.05    6.37
   6   8  -2   -4.05    6.37
  -1   6 -23    1.53    4.65
   4   4 -29    0.47    4.52
   3   6 -24   13.14    2.72
   1   4 -29   -5.13    6.28
   5   6 -23   -6.20    6.19
  10   5 -18   -5.89    5.35
  -3   7 -17    1.31    6.81
   1   7 -20    4.84    6.34
   6   8  -4   -6.89    6.52
  13   3 -11    2.39    6.89
   3   5 -27   -5.74    7.67
  -7   6 -14    2.31    5.70
  10   2 -26   -4.44    5.94
  14   0  -7    0.16    5.49
 -10   6  -1   -2.91    7.55
   8   7 -11   -0.91    5.39
   2   8 -14    5.30    7.79
  14   0  -6    7.67    6.18
  -4   2 -28    1.63    6.07
 -11   5  -3  -10.12    6.27
   1   6 -24   -1.22    6.23
   6   8  -1    7.00    6.52
  -3   3 -28    2.62    4.79
   6   4 -28   -1.22    6.23
  -2   2 -30    2.40    6.91
   6   7 -17    2.01    6.50
  -4   5 -23   13.41    3.30
   6   8  -5    7.69    6.20
  14   0  -8   12.41    3.30
  13   3  -1    9.90    3.57
  14   0  -5    4.08    5.43
   8   5 -23    5.93    6.45
  10   4 -22  -15.74    7.65
   9   5 -21    3.01    5.32
 -10   3 -15   -0.91    5.41
  -1   5 -26    2.62    4.80
  10   1 -27    6.23    5.65
   0   8 -14    8.94    8.37
   3   7 -20    4.94    7.47
   6   2 -31    6.32    4.85
  -3   0 -30    6.25    5.65
   3   2 -32   -3.07    5.19
   7   3 -29    3.39    4.11
  -6   1 -26    3.01    5.34
   9   6 -16    8.78    6.30
  -4   6 -20   -0.53    5.89
  11   4 -19    2.01    6.52
  12   4 -14   -7.91    7.54
 -12   0 -11   -3.00    6.50
  -6   8   0    5.64    7.17
  11   3 -22   -6.53    6.96
  14   0  -9    5.86    5.15
   6   8   0    3.47    7.01
  12   1 -22    5.55    6.02
   7   7 -15   -3.69    6.81
   8   1 -30    0.63    7.15
 -12   3  -7   -5.54    5.87
 -13   0  -6    2.32    3.30
  10   6 -11  -11.15    7.32
  -2   3 -29    3.79    6.28
  -5   4 -24    3.10    6.61
   1   5 -27    5.17    5.56
   7   1 -31    3.40    5.83
   0   1 -32    0.93    6.44
   9   0 -29    5.25    6.78
  14   0  -4    3.10    6.61
  13   2 -16   -4.07    6.41
   6   8  -6   -4.22    9.02
  -4   3 -27   -0.14    6.35
   2   2 -32    0.55    6.00
  -4   0 -29   -8.45    6.06
  -8   7  -4   10.05    8.47
   8   6 -19    2.33    5.74
  -6   5 -20    4.10    5.46
   8   4 -26   -4.39    7.14
   6   0 -32    5.37    4.10
  -5   8  -6    1.64    6.11
  -7   5 -18   -2.69    5.71
  -3   8 -11   -5.48    7.06
  -9   3 -18    2.25    4.21
  11   1 -25    1.63    6.10
   3   3 -31    6.68    7.29
  13   3 -12   -0.68    8.68
   8   3 -28    0.85    5.13
  11   5 -14   -4.86    5.50
  14   0 -10    0.55    4.25
  11   2 -24    1.32    6.86
   9   2 -28    4.87    4.52
  -4   8  -9  -11.28    6.22
  13   1 -18   -2.70    5.72
  -5   7 -14    8.44    5.88
  -2   0 -31    4.49    5.95
   7   6 -21    4.27    7.78
 -12   4  -3    2.71    4.39
   4   5 -27   -5.25    4.99
 -10   5  -9    5.58    6.05
   2   3 -31   -6.64    5.79
  -6   8  -1    8.22    7.73
   0   7 -20    0.93    6.46
   4   2 -32    1.94    5.25
 -10   6  -2   13.97    2.99
 -10   0 -18    8.84    6.34
  14   0  -3   -9.82    6.73
  14   1  -7   -0.54    5.92
  12   2 -21    7.60    8.91
  14   1  -6    3.80    6.30
   3   8 -14   -2.70    5.73
 -13   2  -4    2.89    8.34
 -13   3   0   -6.27    6.26
  13   3   0   -0.54    5.93
   5   8 -11    1.49    8.84
   3   0 -33   19.64    3.78
   6   8  -7    8.31    8.68
   4   6 -24    8.65    3.04
   6   3 -30   18.04    3.62
 -11   0 -15   10.03    8.52
  14   1  -8    3.42    5.86
   8   7 -12    8.46    5.89
   4   8 -13   -3.02    6.54
  14   1  -5    1.33    6.88
  -9   4 -16   -2.71    5.74
  -4   7 -16  -16.90    8.60
  -5   2 -27   -9.14    6.42
 -11   4  -9    4.91    6.42
   0   6 -24   -5.89    6.70
  -9   6  -8    4.91    6.42
  -3   1 -30   -3.02    6.55
   2   0 -33   -1.08    4.16
 -11   5  -4    0.86    5.16
  14   1  -9    2.73    6.23
  -1   2 -31    8.09    5.41
 -12   1 -11   -2.01    5.36
  14   0 -11   -6.28    6.27
   4   3 -31   -1.23    6.31
 -13   1  -6    7.79    6.27
   5   7 -19   19.56    3.32
  10   6 -12    7.47    7.02
   5   4 -29    7.39    5.81
   9   1 -29    7.87    7.40
 -10   4 -13    3.44    5.88
  14   1  -4   -3.72    6.88
 -11   3 -12    3.35    4.37
  -6   8  -2   -3.03    6.56
   0   4 -29    5.53    4.63
 -10   2 -17    5.49    2.87
  -7   7  -9   -0.80    5.16
   4   0 -33   -7.00    6.62
  14   0  -2    2.35    5.79
  -6   7 -12    0.86    5.17
   1   2 -32    6.97    3.09
  12   3 -19   -2.71    5.76
  -9   5 -13    4.60    7.18
  -4   1 -29    2.73    6.26
   6   1 -32    4.49    3.75
  -1   3 -30    6.70    6.19
  13   0 -19   -0.92    5.47
  13   3 -13    8.58    7.12
   6   5 -26    1.65    6.15
  12   4 -15    4.34    3.57
  -1   8 -14   25.68    4.04
  -5   5 -22   -4.13    6.48
  10   3 -25   -7.47    4.78
   4   7 -20    4.31    7.85
  -5   0 -28    5.23    5.62
  -2   8 -13    7.11    6.63
   6   8  -8   12.31    3.73
  14   1 -10   -7.71    6.96
  -8   2 -22   -3.82    5.66
  -5   3 -26   -2.72    5.77
  -8   0 -23    0.95    6.51
  -2   1 -31   -6.31    6.30
   1   8 -15    4.53    6.00
  -6   6 -17    5.31    6.88
   1   3 -31    1.65    6.17
  -8   7  -5    3.67    3.15
   7   5 -25    1.96    5.29
 -12   2 -10    3.05    5.41
  12   0 -23    2.04    6.61
 -10   1 -18    2.04    6.62
  -8   5 -16   -1.32    4.95
  -7   2 -24    6.03    6.55
  10   5 -19    6.34    5.73
  14   1  -3   -9.51    7.20
   0   5 -27    0.16    5.60
 -10   6  -3   -5.54    7.15
   2   8 -15   -0.46    7.17
  -5   8  -7    2.82    7.42
 -13   3  -1   17.87    3.76
  -8   6 -12   -3.12    5.27
   3   1 -33   -5.54    7.15
 -11   2 -14    3.14    6.72
  13   2 -17    2.04    6.62
 -11   1 -15   -1.24    6.35
  14   0 -12    5.95    5.23
  -7   4 -21    4.59    2.49
  11   5 -15   -4.84    6.83
   9   6 -17    5.33    6.89
  -1   0 -32    1.96    5.31
  -7   0 -25   -0.14    6.44
   7   7 -16   -2.34    6.26
   9   3 -27   14.31    3.29
  -5   6 -19    1.26    5.72
   0   9   0    0.24    6.88
 -12   4  -4   -7.44    6.23
   6   7 -18    6.44    6.99
  -2   7 -19   -1.95    6.70
   2   1 -33    3.85    6.39
   0   9  -1    7.20    3.28
 -13   0  -7    9.59    3.17
  -6   8  -3    5.97    5.24
   5   2 -32    0.16    5.62
  14   1 -11    7.45    5.86
  14   0  -1    5.65    6.12
   5   8 -12   17.99    3.80
 -12   3  -8  -11.84    5.84
   8   7 -13   -1.25    6.37
   1   0 -33   11.61    3.08
   0   8 -15   20.57    3.85
  -4   8 -10    6.69    4.81
  11   4 -20    0.24    6.88
  -9   0 -21    6.67    2.63
   4   1 -33    6.53    8.05
   0   9  -2   -1.00    5.07
  -7   6 -15    3.38    4.41
  14   1  -2    0.87    5.21
  -3   4 -27    7.48    5.87
   9   4 -25   -3.36    7.35
 -13   2  -5    7.17    6.69
   2   7 -21   -0.93    5.52
  10   6 -13    0.87    5.22
   6   8  -9   -0.85    6.80
  13   1 -19   -0.85    6.80
   5   5 -27    3.71    4.80
  -1   9   0    7.48    5.87
  10   0 -28    5.05    7.63
  -3   8 -12    8.12    9.37
   1   9  -1   -1.87    7.81
   1   9   0   -3.76    6.96
  -8   4 -19    7.08    5.37
  -2   6 -23    3.24    7.83
  -1   7 -20   -5.65    5.99
  -3   7 -18    2.05    6.66
  -9   2 -20   -9.11    8.61
  -6   4 -23   -4.55    6.09
   6   6 -23   -2.34    6.28
  -5   1 -28    8.34    7.86
  11   0 -26   -4.93    5.59
   9   5 -22    3.72    2.81
  -8   1 -23    6.37    5.78
   9   7  -4    7.07    5.36
 -11   5  -5  -10.37    6.42
  -3   6 -22   -6.42    7.53
   9   7  -5  -12.97    7.01
  -1   9  -1    3.08    6.77
   1   9  -2   -4.98    6.91
  10   4 -23   -2.42    6.29
  -7   3 -23   -5.70    7.23
  -2   4 -28    5.30    6.95
   4   8 -14   14.50    3.83
   5   3 -31   -4.26    6.57
   1   7 -21    1.99    6.68
  -8   3 -21    5.96    5.28
   9   7  -3   -5.69    7.21
   5   0 -33   -1.34    6.41
   0   9  -3    0.45    4.67
 -12   0 -12    9.32    6.89
  11   3 -23    1.99    6.67
   3   8 -15    2.76    7.50
 -10   5 -10   -4.27    6.58
   9   7  -6   -0.63    6.05
   5   6 -24   -0.93    6.84
   8   6 -20    8.52    6.00
   2   6 -25    5.61    6.18
  -1   9  -2   -3.20    5.34
   8   5 -24   -2.04    6.75
  -4   4 -26    9.63    3.24
   9   7  -2    5.99    6.63
   1   9  -3   -8.69    6.21
  -7   1 -25    5.58    4.71
   3   7 -21   -0.22    6.51
 -13   3  -2    1.55    4.80
  -1   1 -32    0.11    5.67
  -9   6  -9    4.31    8.92
  -3   5 -25   -0.88    7.95
  10   2 -27    4.68    2.80
 -10   6  -4   15.35    3.57
   3   4 -30    0.83    5.25
  -8   7  -6   -3.15    6.68
 -14   0   0    7.58    8.20
  -6   8  -4    4.20    4.87
 -10   3 -16    3.77    5.06
  -6   2 -26    3.43    5.99
   2   4 -30    2.88    9.42
   9   7  -7   -0.27    5.14
   3   6 -25    4.14    5.60
 -13   1  -7  -10.51    6.48
  -2   5 -26    3.93    3.57
   8   2 -30   -5.77    6.04
  -5   7 -15   -3.95    5.76
  -1   6 -24   -0.99    5.57
   7   2 -31  -12.22    8.80
   8   0 -31    8.63    7.24
   7   4 -28    2.70    6.37
   1   1 -33    8.58    6.03
   0   2 -32   -0.99    5.57
   0   9  -4    0.89    6.63
  -7   7 -10   -1.72    5.97
  -5   8  -8    4.86    5.19
 -11   4 -10   -5.77    6.05
  -9   1 -21   -3.22    5.36
   7   6 -22   12.22    2.99
   9   7  -1    5.26    5.71
  -1   9  -3    8.21    5.53
   1   9  -4   -0.22    6.53
   6   8 -10    7.15    6.74
   1   6 -25   -3.57    6.26
   0   3 -31    3.80    6.48
  10   1 -28    7.59    3.14
   7   0 -32    2.33    5.90
  11   2 -25   -5.70    7.26
  11   5 -16   -8.30    6.66
  -6   0 -27  -10.21    5.63
   2   5 -28    4.19    4.45
  -4   6 -21  -10.57    6.50
  11   1 -26    7.74    2.90
 -12   4  -5   -2.42    7.54
   3   5 -28    0.14    6.99
   9   7  -8   -0.24    6.55
   2   9  -1    4.95    6.57
  -6   7 -13    6.38    5.85
   2   9   0    0.48    6.20
   5   1 -33  -12.81    6.32
  -2   9   0   -7.26    6.79
   8   7 -14    9.39    6.94
  -4   5 -24    8.27    6.87
  10   6 -14   -4.35    5.26
  -2   8 -14    4.23    6.93
  -6   3 -25    4.23    6.93
   5   8 -13    4.95    6.58
   2   9  -2    2.33    5.91
   6   4 -29   -7.25    6.79
 -12   1 -12   -2.47    6.38
   0   7 -21   -2.85    5.89
  -4   7 -17    7.54    7.19
  -1   8 -15  -11.66    7.59
  -7   5 -19   -1.73    6.00
   4   4 -30    5.91    3.02
   5   7 -20   -2.86    5.90
  -1   4 -29   -0.61    6.10
   8   4 -27   10.49    7.04
   1   8 -16    4.63    7.34
  -9   3 -19    3.78    5.10
  -9   7   0    1.23    5.83
   9   7   0    5.27    5.74
  10   5 -20    4.14    3.43
  -2   9  -1    5.15    4.82
  -6   5 -21   -2.48    6.38
   0   9  -5    3.12    6.85
 -11   3 -13    3.44    6.04
   2   9  -3    8.30    6.88
   9   6 -18    0.17    6.99
   2   8 -16    4.18    5.64
  -1   9  -4   -7.18    7.91
   7   7 -17    3.85    3.41
   1   9  -5    6.44    7.12
 -11   0 -16    3.06    5.53
 -10   4 -14   -6.21    5.59
   1   4 -30   -0.24    6.58
  -3   2 -30    9.51    9.03
  -9   5 -14   -4.29    6.65
   9   0 -30   -7.65    6.35
 -14   1   0    3.99    2.69
   7   3 -30    1.62    6.31
  -9   4 -17    3.44    6.05
 -12   2 -11  -10.15    8.06
  -1   5 -27    2.34    5.94
 -13   2  -6   -5.10    5.71
 -14   0  -1    0.44    4.73
  -4   8 -11   -8.74    7.47
  -6   8  -5   -4.58    8.44
 -13   0  -8   -2.46    6.40
   0   0 -33   -9.49    6.63
 -11   5  -6   16.35    3.26
   8   1 -31   13.78    3.03
   8   3 -29   -4.71    6.19
   9   2 -29    9.67    3.23
 -10   0 -19    3.80    5.11
   4   6 -25   -5.42    6.56
  -8   6 -13    0.87    6.69
   9   7  -9  -12.81    7.53
 -13   3  -3   -3.91    7.09
  -5   4 -25   -0.24    6.60
 -12   3  -9    0.11    5.74
  -2   9  -2    5.70    6.26
  -3   3 -29    8.33    6.90
   1   5 -28    1.62    6.33
   4   7 -21    0.87    6.69
  -4   2 -29   13.55    3.91
   2   9  -4    1.23    5.84
   6   2 -32   -5.44    6.57
 -10   6  -5   -0.59    7.37
   6   7 -19    7.92    6.46
   7   1 -32   -2.51    4.96
   4   5 -28    3.86    6.53
  -6   1 -27    8.99    3.00
  -3   8 -13    7.53    3.21
   6   8 -11    7.93    6.47
   4   8 -15    4.57    6.18
  -8   7  -7    3.46    6.08
  11   4 -21   -3.85    9.14
  -2   2 -31    3.46    6.08
   0   8 -16    3.51    7.32
  -9   7  -1    2.00    6.81
  10   3 -26   -9.54    6.66
 -10   2 -18   -0.22    6.62
  -6   6 -18   -2.15    5.54
   7   8  -3    0.09    5.76
   7   8  -4  -14.34    7.06
  -1   9  -5    8.73    7.35
  -4   3 -28    9.17    8.75
   1   9  -6    6.48    7.17
  -8   5 -17    3.42    4.52
   0   6 -25   -1.42    5.10
  -2   3 -30    2.96    5.14
   0   9  -6    1.95    5.46
   3   2 -33   -1.71    7.30
   7   8  -2    3.85    6.55
 -11   2 -15    6.05    5.38
  -2   9  -3  -11.28    9.00
   3   8 -16   -2.79    8.29
   6   0 -33   -1.75    6.05
   2   9  -5   -3.23    6.80
  -3   0 -31   10.29    2.91
   7   8  -5   -5.86    6.13
  -5   8  -9  -12.18    7.27
 -11   1 -16    8.78    7.36
   7   5 -26    5.58    5.16
   6   3 -31   -9.93    7.43
   6   5 -27    2.35    4.23
   9   7 -10    1.96    5.46
   3   3 -32    4.30    8.11
   9   1 -30    5.01    6.66
   7   8  -1   -5.47    6.61
   2   2 -33   -1.66    8.38
 -10   5 -11   -8.81    7.53
  -9   6 -10   -2.50    6.46
 -14   1  -1   10.63    7.14
  -4   0 -30    3.52    7.35
 -13   1  -8   -6.96    7.31
   0   1 -33   -3.60    6.35
  -2   7 -20   -9.60    6.70
  10   6 -15    4.56    4.66
  11   5 -17   -8.46    6.78
 -10   1 -19    6.47    5.93
  -7   6 -16    1.56    4.90
  -5   5 -23   -3.97    7.16
   7   8  -6    3.82    5.15
 -12   4  -6    2.36    6.01
   2   3 -32   -6.64    5.08
  -5   6 -20    3.09    5.60
   4   2 -33   -1.42    5.12
   8   7 -15    6.33    4.94
   9   5 -23    5.00    6.68
   8   6 -21   -8.82    7.54
 -14   0  -2   -6.97    7.32
   5   4 -30   -1.38    6.56
  -7   7 -11    2.70    5.03
   5   8 -14    2.35    6.01
  10   4 -24    7.99    6.51
  -6   8  -6    1.66    7.60
  -2   9  -4    7.61    6.05
 -12   0 -13   -3.25    6.83
   2   7 -22    2.75    6.50
  11   3 -24    7.65    7.29
   9   3 -28   -3.59    7.57
  -5   2 -28    5.27    5.68
  -2   0 -32    8.35    5.64
  -3   7 -19   -2.16    5.58
   7   8   0    8.39    3.00
  -9   7  -2    1.60    4.03
  -7   8   0    5.35    5.84
  -8   2 -23   -0.98    7.02
  11   6  -5    2.35    6.01
   2   9  -6   -0.41    4.99
   9   4 -26    6.12    4.34
  11   6  -6    2.69    5.03
  -1   9  -6    5.13    2.60
   3   9  -2  -15.59    8.14
   6   6 -24    0.83    5.38
   3   9  -1    1.23    5.91
   4   3 -32  -14.50    7.13
   3   0 -34    1.83    4.70
  -1   7 -21   -1.69    7.35
  -7   4 -22  -10.78    6.63
 -11   4 -11    4.86    3.25
   1   9  -7   -8.42    7.94
  -8   0 -24   10.72    3.50
  11   6  -4   -6.63    6.54
   7   8  -7   -1.03    5.70
 -13   3  -4   -7.05    6.08
   0   4 -30    4.58    4.70
   3   9   0    6.96    7.64
   0   9  -7   -2.52    6.48
  -3   9   0    4.68    7.48
  11   0 -27    2.70    5.04
   1   7 -22   -1.43    5.14
   3   9  -3    3.14    6.97
  11   6  -7   -0.22    6.66
  -5   7 -16    6.16    6.81
   6   1 -33    2.71    5.05
   6   8 -12  -11.82    8.75
  -3   1 -31    4.73    8.54
   0   5 -28   -4.78    6.29
  -1   2 -32   -6.26    7.02
  11   6  -3   -1.72    7.36
  -5   3 -27   12.17    3.49
 -10   6  -6   -1.78    6.12
  -8   4 -20    1.64    6.42
  -7   2 -25    1.97    5.51
 -11   5  -7    0.11    5.83
   9   7 -11   -1.69    7.36
   3   7 -22   -5.17    5.79
   2   0 -34   -5.18    5.79
   8   5 -25    0.88    6.79
  10   0 -29   -5.92    6.19
  -1   3 -31   -5.13    7.11
 -13   2  -7    2.42    7.32
  -2   8 -15   -0.60    7.47
  -3   9  -1    0.10    5.84
   4   0 -34    5.87    8.62
  -7   8  -1    4.98    5.32
   9   6 -19    6.85    4.97
   3   9  -4    4.12    4.85
  -4   1 -30   -1.74    7.39
  -6   7 -14   -0.55    8.54
   5   6 -25    8.62    3.32
   7   7 -18    4.63    6.25
  -1   8 -16    6.20    3.27
  11   6  -8    1.78    3.70
  -4   8 -12    3.86    5.20
   1   2 -33   -3.27    6.87
  -3   6 -23   11.32    3.75
  -2   6 -24    7.31    6.92
  -5   0 -29   17.56    3.55
  -9   0 -22   -1.79    6.13
   5   5 -28   -0.25    6.70
 -12   5   0    5.44    7.18
 -10   3 -17   -1.04    5.74
   7   6 -23  -13.43    7.25
   1   8 -17   -3.66    6.41
  -9   2 -21    2.77    6.55
  -7   0 -26   -3.32    5.50
  10   5 -21   -1.73    7.39
   2   8 -17   -5.93    6.21
  -2   9  -5   -1.05    5.73
   1   3 -32   -3.98    7.21
  -8   7  -8    0.89    6.81
   7   8  -8    4.58    3.40
  11   6  -2    6.59    7.25
 -14   1  -2    8.81    6.20
   2   9  -7    1.24    5.95
 -13   0  -9  -17.98    8.05
  10   2 -28    7.52    5.05
 -12   1 -13    8.50    7.04
  -3   9  -2  -11.20    7.45
  -6   4 -24   -1.84    4.55
  -2   1 -32    6.97    5.03
  -8   3 -22    0.14    7.17
  -9   7  -3   -6.65    7.80
  11   2 -26   -6.28    7.04
   5   7 -21   -2.52    6.53
   2   6 -26    5.07    6.75
   3   9  -5   -0.99    7.08
   4   8 -16   -4.81    6.33
 -12   3 -10   -2.18    5.63
   3   1 -34   -6.66    6.60
  11   6  -9    5.03    4.29
  -4   7 -18    0.10    5.87
   5   2 -33    2.78    6.56
  -7   3 -24    4.66    6.29
  -8   1 -24   -1.74    7.43
  -1   9  -7    2.73    5.09
 -12   2 -12    0.10    5.87
  -5   8 -10   -8.22    6.02
 -14   0  -3   -0.29    5.32
   1   9  -8   -1.39    6.63
  -3   4 -28  -21.85    7.42
 -11   3 -14   -2.18    5.64
  11   1 -27   -9.32    7.21
   3   6 -26   -5.16    7.16
  -3   8 -14    1.99    5.55
  10   6 -16    5.67    3.01
  -7   8  -2    4.27    5.79
  -9   5 -15    6.61    7.31
  -6   8  -7   12.13    2.95
  -8   6 -14   -0.65    6.27
   0   9  -8    3.21    7.02
  11   6  -1    3.13    5.66
 -10   4 -15    3.18    7.03
   6   7 -20    5.67    2.90
  -1   0 -33    1.23    3.68
   0   7 -22    5.81    6.41
  -1   6 -25    0.10    5.88
   7   4 -29    6.91    5.01
 -14   2   0    1.26    5.99
   2   1 -34    2.04    6.95
  11   5 -18    6.65    2.86
  10   1 -29    4.32    7.12
  -4   6 -22    5.68    5.26
  11   4 -22    2.04    6.94
   5   3 -32   -8.95    7.66
   8   7 -16    0.14    7.20
   0   8 -17    9.70    8.28
   9   7 -12    3.20    2.45
 -12   4  -7   -0.30    5.33
  -3   5 -26    7.32    5.60
   4   1 -34   -4.04    7.26
  -3   9  -3    4.52    4.76
  -2   4 -29   -0.30    5.33
   7   8  -9    4.28    5.80
   3   8 -17   -1.02    5.76
   8   2 -31    8.86    6.23
   1   6 -26    5.78    4.89
  -4   4 -27    8.47    5.72
  -7   5 -20   -0.22    6.76
   1   0 -34    1.25    6.00
  -9   1 -22    1.64    6.50
   3   9  -6    5.81    6.42
  -5   1 -29   -1.35    7.87
 -12   5  -1    8.20    2.88
   5   8 -15   -0.65    6.29
 -11   0 -17    3.54    6.22
   4   7 -22    1.64    6.50
  -2   5 -27   -0.65    6.29
  -2   9  -6    4.69    6.32
  11   6 -10    3.53    6.21
  -9   6 -11    6.59    6.04
 -13   3  -5   -0.35    5.36
  -7   1 -26    9.68    7.18
   6   8 -13    0.92    6.85
  -9   4 -18   -2.62    6.60
   2   9  -8    2.36    7.43
   8   0 -32   -3.72    8.78
   5   0 -34    8.44    5.74
 -13   1  -9    1.56    5.00
   3   4 -31    2.34    6.14
   8   4 -28    2.73    6.62
   7   2 -32    0.42    4.88
  -6   2 -27    3.88    6.73
  -9   3 -20    4.82    4.17
 -10   5 -12    3.11    3.58
   2   4 -31    4.67    7.61
 -11   6   0   -3.01    6.12
  -6   5 -22    2.73    6.64
  -7   7 -12  -15.21    9.04
 -10   6  -7  -10.27    7.64
 -13   4   0    6.42    2.87
   3   5 -29    5.76    6.47
  -7   8  -3  -13.34    7.80
   2   5 -29    5.79    6.46
  -4   5 -25    3.89    4.77
 -14   1  -3    0.04    5.94
  -9   7  -4    8.10    6.67
   6   4 -30    0.04    5.93
   4   6 -26   -2.22    8.23
  -3   9  -4    5.02    5.41
 -10   0 -20    0.44    6.46
   7   0 -33    0.44    6.45
 -11   5  -8    3.90    6.75
  -1   9  -8    6.94    5.06
  -6   6 -19   -0.70    7.61
  10   3 -27    1.56    5.02
  -1   1 -33    0.04    5.95
 -11   2 -16    7.03    2.74
   1   9  -9    7.36    7.04
   3   9  -7   -8.38    7.41
  -8   5 -18    6.96    6.59
  -6   3 -26   12.06    3.36
   8   6 -22   -9.53    7.32
   9   2 -30    7.74    7.48
   9   0 -31   -6.85    6.70
   7   8 -10    7.50    2.88
  11   6 -11   -3.79    6.52
 -14   2  -1    0.04    5.95
   8   3 -30    6.66   10.38
  -6   0 -28    1.20    6.06
   4   4 -31    4.69    7.64
 -13   2  -8   -0.32    4.84
   7   3 -31    6.58    6.08
   0   2 -33   -4.93    7.69
 -11   4 -12   -5.00    6.46
   0   9  -9   -1.88    6.25
  -7   6 -17    4.29    7.23
 -10   2 -19    7.00    4.73
  -8   7  -9    6.59    6.09
   0   3 -32    2.01    8.20
   9   5 -24   -6.08    7.60
   1   1 -34   -4.56    6.92
 -11   1 -17    3.53    7.57
 -12   5  -2    4.28    4.15
 -14   0  -4    2.77    7.90
   9   7 -13   -5.74    5.36
  -1   5 -28   -0.70    7.64
  -1   4 -30   -7.27    6.24
 -12   0 -14   21.99    3.94
  -4   8 -13   -4.57    6.93
   5   1 -34    5.06    6.88
   4   9  -2   -0.32    6.86
  11   3 -25    1.61    7.80
  -2   7 -21   -4.19    6.05
  -2   9  -7   -0.72    6.37
   8   1 -32    0.83    6.94
  -6   8  -8    6.20    5.56
   9   6 -20    5.81    4.94
  10   4 -25   -5.33    7.27
   7   7 -19    5.43    5.99
   4   9  -1    2.75    6.68
 -11   6  -1    8.94    3.30
   7   5 -27   -6.88    6.73
   4   9  -3    0.44    6.48
  -5   4 -26   -4.96    6.45
   4   5 -29    9.41    3.71
   2   9  -9   -6.13    6.35
   1   5 -29    6.23    4.94
  -2   8 -16   -7.65    7.10
   1   4 -31    6.62    7.43
  10   6 -17    3.91    6.78
   0   6 -26    1.21    6.09
   4   9   0    3.13    5.77
  -4   9   0   -1.89    6.28
  -3   7 -20    0.06    7.33
  -5   8 -11   -5.35    7.30
  -5   7 -17    2.76    6.70
 -13   4  -1    5.09    6.90
  -7   8  -4    7.24    2.85
  -1   8 -17   -0.36    5.42
   4   9  -4   -8.45    6.15
   6   5 -28    2.38    7.50
  -3   9  -5   -5.74    6.85
 -13   0 -10    1.21    6.10
  -5   6 -21    2.76    6.70
   2   7 -23    8.17    6.73
  -6   7 -15   -0.32    6.88
   2   8 -18   -4.59    6.95
   4   8 -17    9.73    7.28
   6   2 -33   -3.02    7.48
  10   5 -22    5.45    6.01
 -10   1 -20    3.91    5.33
   7   1 -33   -1.48    5.24
  -3   2 -31   -1.51    5.30
   1   8 -18   11.36    3.42
   3   9  -8    0.04    5.98
   6   6 -25    0.06    7.33
   6   8 -14   -1.89    6.29
   9   4 -27    6.24    7.00
  -1   7 -22    2.77    6.72
  -3   3 -30   -8.47    6.16
   8   7 -17    0.04    5.99
   9   1 -31   -0.33    6.88
  -4   9  -1    2.39    7.53
  11   5 -19    7.38    5.69
  -9   7  -5   -1.49    6.79
 -12   3 -11    1.60    6.62
  11   6 -12    7.02    6.62
  -6   1 -28    1.21    6.11
 -12   4  -8    0.04    6.00
 -13   3  -6  -18.16    7.53
  11   0 -28   -2.65    6.69
  -4   2 -30   -0.30    8.10
   4   9  -5    6.45    4.65
   1   7 -23   10.17    3.66
   3   7 -23  -11.56    7.65
  -5   5 -24    0.83    6.99
   7   8 -11   -9.24    6.57
   9   3 -29    4.08    2.89
  -3   8 -15    3.94    6.83
   5   8 -16   -1.47    8.01
   0   0 -34    3.17    5.08
  -1   9  -9    2.77    6.73
 -14   1  -4    3.66    3.48
   7   6 -24    0.86    8.18
   1   9 -10    5.88    4.04
   8   5 -26   -4.59    6.97
  -4   3 -29    0.83    7.00
   6   3 -32    0.81    5.57
 -14   2  -2   -6.57    5.87
 -12   1 -14    4.29    4.13
   5   7 -22   -9.27    6.58
 -12   2 -13   -3.84    6.62
 -10   6  -8    5.51    7.40
  -2   2 -32   -1.90    6.32
 -11   6  -2    0.06    7.38
   6   0 -34    3.13    3.96
 -12   5  -3   10.81    3.35
  -2   3 -31   -3.44    7.09
  -4   9  -2    0.84    7.02
  -7   4 -23   -4.61    6.99
   5   4 -31    6.66    6.16
   3   8 -18    8.60    5.84
   6   7 -21   -6.15    7.70
 -10   3 -18    2.43    8.68
   3   2 -34    5.91    7.83
  -8   4 -21    8.00    2.90
   0   9 -10    1.67    9.93
   5   6 -26    2.36    4.57
  -8   6 -15   -5.41    6.00
   4   9  -6   -5.41    5.99
  -8   2 -24  -11.59    8.79
  -2   9  -8    9.41    6.88
  11   4 -23    4.91    4.74
   9   7 -14   -2.70    5.20
  -9   6 -12    6.29    7.05
 -11   3 -15  -10.08    6.98
 -13   1 -10   -8.90    7.09
   0   8 -18   -7.36    6.31
  11   2 -27    3.92    5.36
   3   3 -33    2.03    8.30
  -4   7 -19   -6.94    8.04
  10   0 -30    5.74    3.20
  -3   9  -6   -8.13    6.71
   2   9 -10    9.59    3.49
  -3   0 -32   -5.42    6.01
 -13   4  -2   -5.03    6.54
  -9   5 -16    1.61    6.66
  -7   8  -5    5.53    7.42
 -10   4 -16    9.51    3.13
 -14   0  -5    7.46    5.76
 -11   5  -9    8.64    5.87
  -3   6 -24    0.64    4.81
   3   9  -9   -4.25    6.13
  -8   0 -25   -7.37    6.32
   2   2 -34    2.79    6.77
  -7   7 -13    9.03    6.40
  -2   6 -25    4.11    2.66
  10   2 -29    2.01    7.13
   2   3 -33    3.19    7.23
  -4   0 -31   -7.36    7.63
   4   2 -34    5.53    4.80
  10   7  -5    5.11    5.50
  11   1 -28    0.04    6.04
 -10   5 -13    5.14    4.45
  10   7  -4    3.94    5.38
   5   5 -29   -0.33    6.96
  11   6 -13   -5.40    7.37
  -6   8  -9   -3.46    7.12
  -8   7 -10    6.70    6.19
  -9   2 -22    8.67    7.28
  -5   2 -29   10.26    8.90
   0   5 -29    1.59    5.12
  -4   9  -3    1.64    7.94
  10   7  -6   -7.37    6.32
   0   1 -34    6.30    5.64
  -9   0 -23    4.75    6.50
   4   3 -33   -9.33    6.63
  -7   2 -26   -0.75    4.85
  10   7  -3    2.80    6.78
   0   4 -31    6.73    7.54
   4   9  -7   -5.02    7.83
 -13   2  -9    0.84    7.07
   4   7 -23    1.62    6.68
   0   7 -23   -5.44    6.04
   7   8 -12   -3.46    7.14
   2   6 -27    6.95    2.91
  -5   3 -28    5.94    6.62
  -8   3 -23   -2.69    6.77
  10   7  -7    2.00    5.73
   6   1 -34    5.06    2.57
  10   6 -18   -5.44    6.03
  -9   7  -6   -9.34    7.92
   3   6 -27  -12.09    7.29
  -2   0 -33   -4.25    7.51
  -6   4 -25    4.36    5.99
   8   8  -4   -2.31    4.12
   3   0 -35    3.58    6.41
  10   7  -2    3.18    5.86
 -11   0 -18   -2.29    7.26
   8   8  -3   -2.31    5.84
 -11   6  -3    9.09    6.45
  -4   8 -14   -0.33    6.99
 -14   2  -3    0.84    7.09
   6   8 -15    3.18    5.87
  -4   6 -23   -1.14    5.97
  -1   9 -10   -3.88    6.69
   8   8  -5   -0.33    4.94
  -5   8 -12    4.38    7.38
  10   1 -30    6.70    4.49
  -7   5 -21    5.95    6.64
   8   6 -23    1.62    6.71
   1   9 -11    5.16    4.47
  -7   0 -27    8.31    6.84
   9   6 -21    8.30    6.83
  -9   4 -19    9.74    2.73
   7   7 -20   -1.94    4.72
  -3   1 -32   -1.12    7.37
 -11   4 -13    3.91    2.93
   8   8  -2    0.45    6.61
 -12   5  -4    1.62    6.72
  10   7  -8    4.76    6.52
  -1   6 -26    6.74    6.23
  -1   3 -32    1.25    7.55
  -7   3 -25   -4.64    8.28
  -1   2 -33    3.60    5.03
  -8   1 -25   -6.65    5.95
 -14   1  -5   -5.45    7.44
  -3   9  -7   -4.26    7.53
   7   4 -30    3.59    6.43
  -4   1 -31  -13.69    9.09
   4   0 -35    1.23    6.21
   8   8  -6    1.60    5.16
 -13   3  -7    2.03    7.21
  -5   0 -30   -6.63    7.35
  -4   9  -4   -5.06    6.60
   8   7 -18   -7.43    6.37
   2   0 -35   -3.12    4.59
   1   6 -27    2.56    4.27
  -2   9  -9    5.16    5.56
   1   3 -33   -4.27    7.54
   8   4 -29    0.45    6.62
  10   7  -1   -0.33    7.00
  -2   8 -17    3.20    5.90
   4   8 -18   -3.49    7.18
   3   9 -10   -5.07    6.60
 -13   4  -3    6.73    4.52
   1   2 -34   -1.54    5.40
  11   5 -20   -0.35    5.52
 -11   2 -17    5.26    2.95
   4   9  -8   -2.32    5.87
   0   9 -11    4.38    6.02
   8   8  -1    3.60    6.44
  -9   1 -23    0.04    6.11
 -12   4  -9   -0.74    6.53
  -7   8  -6    6.02    9.03
  -9   3 -21   18.78    3.45
   9   7 -15    1.61    5.17
  -3   5 -27    7.15    6.77
  -6   6 -20    1.61    5.18
   2   9 -11    0.26    5.45
   9   5 -25    2.41    6.32
  -3   4 -29   -7.83    7.27
 -13   0 -11    6.55    3.39
   5   8 -17   -1.15    5.99
  -8   5 -19    7.17    4.79
  -7   6 -18    2.42    6.34
   8   2 -32    1.25    7.57
   5   2 -34    2.02    5.78
  10   3 -28    5.21    8.26
  11   6 -14  -13.74    6.76
 -12   0 -15    3.21    5.91
  -6   5 -23   -4.28    7.56
  -1   8 -18    2.94    3.50
   8   8  -7    2.97    2.77
   2   8 -19    7.58    5.12
  11   3 -26    5.74    2.97
  10   7  -9   -1.54    5.41
  10   5 -23   -1.95    4.75
 -10   6  -9   -1.15    6.01
  -6   7 -16   -3.12    6.32
   4   6 -27   -0.72    7.84
  -2   1 -33   -5.49    6.10
  -2   5 -28    4.39    6.04
   1   8 -19    6.77    6.26
  10   4 -26    9.53    6.97
   5   3 -33    5.20    7.06
  -4   4 -28    7.58    7.27
 -12   3 -12    0.07    7.50
   3   1 -35    8.76    7.35
  -5   7 -18   -2.33    5.90
 -11   1 -18   -5.50    6.10
 -10   0 -21   -0.36    5.55
   8   0 -33    7.25    2.82
  -8   8   0    4.02    6.97
   8   8   0    0.83    5.68
  -2   4 -30    3.24    7.34
  -3   8 -16    9.16    6.49
 -10   7   0    4.00    5.46
  10   7   0    3.21    5.92
   7   8 -13    8.75    5.95
 -14   0  -6    0.85    7.16
  -2   7 -22   -2.72    6.85
  -7   1 -27   -5.11    6.64
  -4   5 -26    1.06    5.23
 -10   2 -20    1.26    7.61
   7   2 -33    2.02    5.81
   6   4 -31  -11.03    7.47
   3   5 -30    5.58    4.38
   3   4 -32   -0.33    7.06
   8   8  -8    1.64    6.77
 -14   3   0    4.03    6.98
   5   9  -2    6.79    6.28
  -3   7 -21    7.19    6.80
  -4   9  -5    2.43    6.37
   5   9  -3   -1.13    7.42
  -5   1 -30   -6.26    8.97
   9   2 -31   -2.70    8.11
  -6   8 -10    4.41    6.06
 -11   6  -4   -1.92    7.79
   2   5 -30  -16.59    8.63
   4   1 -35    4.93    3.84
  -6   2 -28    0.04    6.15
  -1   0 -34   -7.88    7.32
   2   1 -35    7.61    5.15
   7   5 -28    7.14    5.25
   5   9  -1    4.27    6.35
   9   0 -32   -2.03    6.49
   8   3 -31    9.11    6.53
   2   7 -24   -8.02    8.55
   3   8 -19    1.97    5.84
  -9   7  -7   -7.62    7.81
   2   4 -32    5.55    6.20
   5   9  -4    1.55    6.80
  10   7 -10    3.15    5.96
 -11   5 -10    5.14    7.13
   4   9  -9    3.14    7.39
 -14   2  -4    3.93    8.27
   5   0 -35    9.52    7.04
  -9   6 -13   -7.22    6.98
 -13   1 -11    3.16    5.98
   1   0 -35   11.29    3.26
 -12   2 -14   -4.44    7.65
   6   6 -26    5.16    5.63
  -8   7 -11    1.95    7.31
  -3   9  -8    3.15    7.41
   5   9   0    1.56    6.82
  -8   8  -1  -10.03    7.63
  -5   6 -22   -1.23    6.07
  -5   9   0   -8.05    8.57
   6   7 -22   -2.44    7.38
  -1   9 -11    4.74    7.94
   7   3 -32    5.15    4.54
  -1   7 -23   -6.42    6.60
  -6   3 -27    6.36    5.76
   7   0 -34   -3.22    6.39
   9   4 -28   -1.63    7.00
 -12   1 -15   -9.62    6.79
  11   4 -24    8.74    6.00
 -12   5  -5    5.96    6.75
   3   7 -24    0.34    8.02
   5   9  -5    2.74    8.19
   5   7 -23    7.70    3.24
   7   6 -25   -6.03    7.10
   1   9 -12    3.96    7.04
  -7   7 -14    5.96    6.75
   0   8 -19   -6.44    7.91
   3   9 -11    7.14    5.31
  -8   6 -16    7.18    5.28
   4   4 -32    3.96    7.04
 -10   7  -1    2.77    5.38
  10   6 -19    5.55    6.21
   1   7 -24    5.17    5.64
   0   6 -27    1.96    7.33
   6   5 -29   -6.84    7.47
   6   8 -16    4.76    6.64
 -13   4  -4   -0.45    7.13
  11   0 -29    9.94    7.53
  -1   5 -29    5.57    6.23
   8   8  -9   -6.44    6.60
  -2   9 -10    6.36    7.26
   4   5 -30    8.77    6.01
 -10   1 -21   11.15    8.81
   8   1 -33    5.00    3.23
  -7   8  -7    4.74    6.05
 -13   2 -10    2.36    7.79
   8   5 -27    6.56    4.81
 -14   1  -6   -5.64    6.18
  11   6 -15    5.15    7.14
  -6   0 -29   -0.43    5.62
  -5   9  -1    5.97    5.27
   2   9 -12   -0.45    7.14
  -5   4 -27  -18.89    7.81
 -11   3 -16    7.18    6.87
 -10   5 -14   -9.66    6.81
   1   5 -30    5.99    5.15
   9   7 -16   -0.02    4.39
   0   9 -12    1.93    9.62
   5   9  -6   -2.45    7.41
   9   3 -30    7.58    5.90
  -9   5 -17    4.78    6.67
  -1   4 -31    5.58    4.41
  -4   7 -20    3.44    3.68
  -5   8 -13    7.19    6.88
 -14   3  -1    4.12    3.31
  10   7 -11    6.38    5.78
 -13   3  -8   -9.28    7.31
   0   3 -33    8.80    2.84
  -1   1 -34    6.00    5.15
  11   2 -28    1.56    6.86
  -4   9  -6   -3.25    6.43
   9   1 -32    7.97    5.53
 -10   3 -19    0.37    6.76
  -8   8  -2   -2.04    6.55
  -4   8 -15   -3.66    7.34
 -10   4 -17   -8.07    5.97
  -5   5 -25    1.98    5.90
   0   2 -34  -10.90    8.04
   5   1 -35    9.20    6.59
   1   4 -32   -2.05    6.54
   5   6 -27    8.31    3.55
   8   7 -19    3.18    6.01
   7   8 -14    6.78    7.74
   1   1 -35    0.57    4.45
   4   9 -10    1.98    5.90
  -5   9  -2    7.23    5.31
  -8   4 -22  -14.94    7.32
   9   6 -22   -0.84    6.66
   7   1 -34    4.19    4.68
 -11   6  -5  -10.93    8.05
   7   7 -21   -3.25    6.44
   6   2 -34   -1.65    7.07
 -10   7  -2   -0.45    7.18
  11   5 -21   -0.84    6.65
 -12   4 -10   -2.86    6.97
   8   8 -10   -4.48    7.71
  -7   4 -24   -5.67    6.22
   5   9  -7   -3.28    7.82
   5   8 -18   -8.09    5.98
  11   1 -29    1.97    5.22
  10   0 -31   -6.88    6.10
 -10   6 -10   -8.52    6.96
   4   7 -24   -0.43    5.66
 -11   4 -14    1.97    7.39
   4   8 -19    4.40    6.16
  10   2 -30   -4.88    7.25
   8   6 -24    1.18    4.50
 -14   0  -7    4.03    3.38
   6   3 -33    3.42    3.19
  -6   1 -29    5.62    4.45
  -3   9  -9    5.64    4.47
  -3   3 -31   -3.27    6.46
  -3   2 -32    7.64    5.95
  -3   6 -25    1.99    5.93
  -8   2 -25   -0.47    8.45
 -14   2  -5    4.02    5.57
  -9   7  -8   -5.70    7.65
   0   7 -24  -12.99    8.33
 -13   0 -12   -3.66    5.91
  -2   8 -18   -5.30    6.78
  -4   2 -31    5.63    6.29
   5   4 -32   -6.10    7.18
  -6   8 -11    1.18    6.38
  -2   6 -26    2.93    3.88
  -4   3 -30    0.76    7.31
  10   7 -12   -0.45    7.19
   3   9 -12   -1.25    6.16
  -8   8  -3   -2.06    6.60
 -12   5  -6    4.34    2.71
  -5   9  -3    1.18    6.39
  -1   9 -12    6.92    3.30
  -9   2 -23   -6.54    8.03
   5   5 -30  -14.23    8.25
   2   8 -20   -4.09    6.91
   6   0 -35  -10.16    6.35
 -11   0 -19   -0.45    7.23
 -13   4  -5   -0.03    6.28
 -14   3  -2    8.48    7.06
   1   9 -13   -2.06    6.60
  -1   8 -19  -10.19    7.75
  11   6 -16    8.87    6.09
  -4   9  -7   -3.30    7.87
  10   5 -24    0.78    5.82
  -7   8  -8    2.78    8.33
   5   9  -8    1.97    8.65
 -12   3 -13   -5.31    6.81
  -8   0 -26   -3.69    7.41
  -9   4 -20    0.77    7.33
  -2   9 -11   -3.30    7.87
   2   6 -28   -6.52    6.70
  -2   3 -32    6.85    3.27
  -6   7 -17    5.25    5.72
  -3   8 -17   -2.88    7.02
   0   0 -35    3.42    3.91
  -9   0 -24   -2.05    4.89
   1   8 -20    0.77    7.33
   9   5 -26   -2.07    6.61
   3   6 -28   -2.08    7.97
  -2   2 -33    4.40    8.84
 -11   5 -11    4.43    4.92
   3   3 -34   -0.83    5.04
  -7   5 -22   -6.95    7.59
   8   8 -11   -3.28    6.50
  -4   6 -24    3.22    6.08
  -8   3 -24   -6.56    8.06
   3   2 -35    7.28    5.36
   2   9 -13    2.38    7.90
 -10   7  -3    6.46    7.37
   0   5 -30    4.04    5.60
  10   1 -31    0.36    6.83
 -11   2 -18    9.63    3.41
  -7   6 -19   -1.25    6.18
  -8   7 -12   -9.82    8.22
 -12   0 -16    8.82    3.10
   4   9 -11    7.68    5.27
  11   3 -27    0.35    8.15
   6   8 -17   10.11    7.65
 -14   1  -7    1.60    5.34
  -7   2 -27   -2.48    6.07
  10   6 -20   -1.67    7.13
  -6   6 -21  -17.14    7.67
   9   7 -17   -5.73    6.27
  -5   7 -19   -5.33    6.83
   0   9 -13    4.85    6.77
  -8   5 -20   -1.67    7.16
  10   4 -27   -1.27    7.62
  -9   6 -14   -0.03    6.31
   3   8 -20    6.27    5.04
  -6   4 -26   -7.36    5.56
   2   3 -34    2.83    5.48
 -13   1 -12    8.11    6.58
  10   3 -29   -1.67    7.14
  -5   2 -30   -1.87    4.34
  -1   6 -27  -11.45    6.27
  -3   0 -33   -1.24    4.30
   4   2 -35   -4.51    6.41
   7   8 -15    3.43    4.51
  -5   9  -4    0.79    5.86
   8   4 -30    5.45    5.31
   4   3 -34  -10.22    6.39
   7   4 -31   -1.26    6.19
 -15   0   0    5.67    6.35
 -11   6  -6    1.19    6.45
  -4   0 -32    3.22    7.57
   2   2 -35   -0.03    6.32
  -9   3 -22    1.27    2.93
   0   4 -32    2.01    5.99
  -5   3 -29    4.86    6.78
   1   6 -28   -9.83    6.93
  -7   3 -26   -4.53    6.42
  -7   7 -15   -5.77    7.73
  -8   8  -4   -3.74    8.70
 -13   2 -11   -6.99    7.63
 -11   1 -19   -3.71    5.97
  10   7 -13    6.08    6.89
 -13   3  -9   -0.06    8.96
   5   9  -9   -7.83    9.17
   6   1 -35   -1.26    6.21
  -2   7 -23    0.77    7.39
  11   4 -25    6.08    6.89
 -12   2 -15    4.37    8.91
   6   7 -23   -1.26    6.22
   4   6 -28   -1.67    7.18
  -8   1 -26   -0.46    7.29
  -6   5 -24   -8.63    7.05
  -5   8 -14    7.71    8.75
   0   1 -35    0.37    6.88
  -9   1 -24   -0.85    6.78
  -3   7 -22   -2.90    7.07
   0   8 -20   -2.90    7.08
  -3   9 -10    7.33    7.02
  -7   0 -28    1.61    5.37
 -14   3  -3   -4.54    6.45
 -10   0 -22   -0.05    7.79
  -8   6 -17   -2.08    6.68
 -12   1 -16   -1.26    6.23
  -3   5 -28   -5.40    9.36
   8   7 -20   -2.08    6.67
 -10   2 -21    0.79    5.89
   5   7 -24   -4.14    6.98
   2   7 -25   -3.32    6.56
   8   2 -33    0.39    5.23
   8   8 -12  -10.29    7.83
 -14   2  -6   -6.18    5.74
   3   9 -13    3.87    3.76
  -2   0 -34    2.83    7.11
 -10   5 -15    2.01    7.51
  -4   9  -8   -5.77    6.33
  -4   8 -16    4.48    6.26
   3   0 -36   -6.61    8.13
   7   6 -26    8.16    6.61
 -10   7  -4   11.44    3.73
  -9   7  -9    1.81    5.15
  -1   3 -33   -9.92    9.44
 -14   0  -8    2.01    7.52
  -3   4 -30   10.14    8.97
   7   5 -29    3.25    6.14
   6   6 -27    6.96    4.69
 -10   6 -11   -2.91    7.11
  -5   0 -31    8.18    6.63
  11   5 -22   -0.03    6.35
 -12   4 -11    5.30    7.34
 -12   5  -7   -9.90    6.98
   3   7 -25   -1.68    7.21
  -3   1 -33    2.02    6.03
 -13   4  -6    5.32    5.80
  -2   5 -29    6.66    4.64
  11   6 -17    2.03    6.02
  -1   2 -34    8.17    8.02
 -15   1   0    7.36    7.06
  -1   7 -24   -3.74    7.51
  -4   1 -32    5.72    6.39
   5   8 -19    6.54    5.92
  -5   9  -5   -2.50    6.13
   4   0 -36    5.52    4.32
  -5   6 -23   -1.28    7.71
   9   2 -32   -2.52    8.83
   9   4 -29    4.47    7.72
   4   9 -12    1.60    7.03
  -4   5 -27    6.95    6.52
   1   3 -34    7.15    4.80
  -7   8  -9    5.71    5.05
 -11   3 -17   11.88    8.30
  -1   9 -13    5.72    6.40
  -6   8 -12    1.60    7.03
   9   6 -23    7.53    2.85
   5   2 -35   -3.33    6.58
   8   0 -34   -5.81    7.78
   7   7 -22    9.01    6.18
 -15   0  -1    3.26    6.16
   1   7 -25  -12.80    7.67
  -4   4 -29    3.65    8.10
   6   4 -32    7.75    6.22
  -9   5 -18    6.14    6.95
   1   9 -14   -3.73    6.02
   5   3 -34   -4.56    6.47
   8   3 -32   -7.86    6.68
  -2   9 -12    9.03    6.19
   1   2 -35   -0.86    6.82
   8   5 -28    4.07    7.25
   2   0 -36    2.63    5.37
  11   0 -30    4.98    2.68
   3   5 -31    4.49    3.08
   6   9  -3   -1.27    6.26
   6   9  -2    1.59    8.36
   5   9 -10    9.00    7.66
  -4   7 -21   -5.81    7.80
   4   8 -20   -1.69    7.23
   9   0 -33    5.81    5.30
   7   2 -34   -0.44    5.78
   6   9  -4    5.73    6.41
  -2   4 -31    6.15    6.96
   2   5 -31    3.80    4.00
  -8   8  -5   -3.34    6.61
  -7   1 -28   -1.27    6.27
 -10   4 -18    4.93    5.16
   2   9 -14   -0.05    7.83
  10   7 -14    3.26    6.17
 -13   5   0    4.10    5.70
   6   9  -1   -1.27    6.28
  11   2 -29    2.44    6.62
   6   5 -30    2.04    6.05
 -11   4 -15   -0.46    7.36
   3   4 -33   -6.65    8.18
 -10   1 -22    4.91    6.86
   6   9  -5   -0.46    7.35
 -13   0 -13    7.81    7.59
  -2   1 -34   -3.76    7.55
  -6   2 -29   -3.77    7.55
   9   7 -18    0.35    8.29
   3   1 -36   -3.33    4.82
   0   6 -28   -7.05    6.26
 -10   3 -20    0.38    6.96
   7   3 -33    3.68    6.75
 -11   6  -7   -8.30    6.14
   7   8 -16   -5.41    6.93
   0   9 -14    2.45    6.65
   6   8 -18   -4.18    7.05
 -14   1  -8    4.79    3.87
   8   6 -25  -13.27    7.22
  -6   9   0    7.43    5.46
  -2   8 -19    2.45    4.70
   9   3 -31    6.11    3.66
   2   4 -33    5.14    3.64
   6   9   0    7.00    6.55
  -5   1 -31    3.22    6.22
   4   5 -31   -3.44    6.65
  -6   3 -28   -3.44    6.66
   8   8 -13   -2.99    5.56
 -11   5 -12   -0.51    5.85
   5   6 -28   -3.94    8.85
   6   9  -6   -2.14    5.01
   4   7 -25    2.37    6.68
   4   1 -36   -6.37    7.39
  -8   7 -13    2.38    6.69
 -12   6   0    3.22    6.23
   7   0 -35    1.92    7.61
 -14   3  -4    1.13    6.58
   4   4 -33    9.42    6.82
  10   6 -21    2.77    7.21
   8   1 -34   -0.73    4.52
 -15   1  -1    4.41    7.83
   2   8 -21    5.25    7.44
  -1   5 -30    4.46    6.35
   5   0 -36    1.52    7.12
  -5   9  -6    6.68    3.21
 -10   7  -5    5.91    4.78
  11   1 -30    4.63    5.22
   2   1 -36    6.95    6.59
 -12   3 -14    5.26    7.44
  -3   9 -11    7.46    2.83
  10   5 -25    1.98    6.10
  -3   8 -18    4.02    7.34
  -1   8 -20   -1.36    6.34
  -1   0 -35   -0.17    7.91
  -4   9  -9    9.84    7.36
  -5   4 -28    0.68    7.53
  -8   4 -23    7.75    7.65
  -5   5 -26   -0.57    7.43
   9   1 -33  -11.81    7.87
   9   8  -4    4.85    6.91
   9   8  -5   -5.93    6.43
  -6   9  -1    3.62    6.82
   1   5 -31    7.81    6.14
   1   8 -21    5.30    4.75
 -15   0  -2    1.53    7.14
   9   8  -3    5.31    5.88
  -6   7 -18    0.74    6.00
 -13   5  -1    5.70    5.14
   5   9 -11   -1.75    5.73
   3   9 -14   -4.30    7.12
   1   0 -36   -0.11    6.47
  10   2 -31    4.42    7.83
   0   7 -25    7.43    5.50
   9   8  -6   -0.57    7.43
 -13   3 -10    7.83    6.15
   6   9  -7  -14.78    8.52
  10   0 -32   -0.57    7.44
   4   9 -13    5.71    4.05
  -6   0 -30    4.06    4.67
 -14   2  -7    1.53    7.15
  -9   6 -15    1.14    6.60
 -13   1 -13   -0.57    7.45
   9   8  -2   -2.66    7.73
   3   8 -21   -3.06    7.23
  -7   4 -25   -1.82    7.35
  -1   4 -32   -6.02    7.92
   9   5 -27   -5.55    7.01
  -8   8  -6   -4.71    6.59
 -13   2 -12    5.54    4.40
  11   6 -18   -1.36    6.35
  -3   6 -26    1.59    5.49
  -9   7 -10   -6.82    6.92
   9   8  -7    0.68    7.55
 -13   4  -7    4.80    3.21
 -12   5  -8    6.14    7.08
 -12   0 -17   -6.03    7.94
  -5   8 -15    7.44    5.52
 -11   0 -20   -6.03    7.94
  11   3 -28   -8.91    7.22
  10   7 -15    5.11    4.56
 -12   6  -1    1.57    4.52
  -7   7 -16    2.19    4.56
;

_shelx_hkl_checksum   47099

#==============================================================================
#     End of CIF
# start Validation Reply Form
_vrf_PLAT026_HNEt3VO2L5-H
;
PROBLEM: Ratio Observed / Unique Reflections (too) Low ..        33% Check 
RESPONSE: Low diffraction was observed for this crystal and was especially low 
for high angles. The crystals effloresce during the reflection measurements.


;
# end Validation Reply Form
